# Supplementary material for: Hbo1 and Msl complexes preserve differential compaction and H3K27me3 marking of active and inactive X chromosomes during mitosis
Source: Research Square preprint supplement (doi:10.21203/rs.3.rs-4687808/v1), 2024-07-16
Supplement: Supplementary file 1 [file 74ce918a1a83af67fe935756.xlsx]

## Sheet: Up in Female chr X
Significant	#NAME?	Difference	Protein IDs	Majority protein IDs	Protein names	Gene names	id	Symbol color	Symbol type	Symbol size	Show label	Only identified by site	Reverse	Potential contaminant	Peptides	Razor + unique peptides	Unique peptides	Sequence coverage [%]	Unique + razor sequence coverage [%]	Unique sequence coverage [%]	Mol. weight [kDa]	Q-value	Score	Intensity	MS/MS count	LFQ intensity FMpool_01	LFQ intensity FMpool_02	LFQ intensity X_F1	LFQ intensity X_F2	LFQ intensity X_F3	LFQ intensity X_F4	LFQ intensity X_F5	LFQ intensity X_F6	LFQ intensity X_M1	LFQ intensity X_M2	LFQ intensity X_M3	LFQ intensity X_M4	LFQ intensity X_M5	LFQ intensity X_M6
+	2.26467	-0.857231	A2AR02	A2AR02	Peptidyl-prolyl cis-trans isomerase G	Ppig	17	Color2 [A=255, R=255, G=140, B=140]	9	4					3	3	3	4.1	4.1	4.1	88.324	0.00041391	2.2142	32394000	11	20.2326	20.3055	21.5807	20.7156	20.619	20.5564	20.9439	20.727	20.7809	20.0393	19.6885	20.2413	19.6704	19.5787
+	3.78667	-0.773815	C0HKD9;C0HKD8	C0HKD9;C0HKD8			34	Color2 [A=255, R=255, G=140, B=140]	9	4					7	7	7	27.1	27.1	27.1	51.954	0	26.89	208420000	37	23.3754	23.1486	23.6014	23.1982	23.5345	23.4282	23.7402	23.5347	22.7757	23.0999	22.8791	22.7754	22.3338	22.5302
+	3.26918	-1.03007	O35127	O35127	Protein C10	Grcc10	194	Color2 [A=255, R=255, G=140, B=140]	9	4					3	3	3	36.5	36.5	36.5	13.194	0	25.91	45509000	12	21.3431	20.5459	22.0071	22.0878	NaN	21.3946	21.4458	21.5687	20.5984	NaN	20.5637	NaN	20.7118	20.809
+	2.50022	-0.589883	O35691	O35691	Pinin	Pnn	227	Color2 [A=255, R=255, G=140, B=140]	9	4					17	17	17	28.8	28.8	28.8	82.435	0	83.813	850540000	117	25.2252	25.2517	24.937	25.7414	25.1908	25.416	25.7384	25.4968	24.8716	24.8851	25.0484	24.995	24.5206	24.6604
+	4.59583	-0.474271	O55128	O55128	Histone deacetylase complex subunit SAP18	Sap18	257	Color2 [A=255, R=255, G=140, B=140]	9	4					10	10	10	69.3	69.3	69.3	17.595	0	82.034	2287200000	93	26.5271	26.7031	26.7498	26.8282	26.6966	26.8844	26.9841	26.9706	26.4079	26.3497	26.5469	26.4315	26.2651	26.267
+	2.43529	-0.926555	O88291	O88291	DBIRD complex subunit ZNF326	Znf326	289	Color2 [A=255, R=255, G=140, B=140]	9	4					6	6	6	16.4	16.4	16.4	65.225	0	34.12	276310000	29	23.5577	23.6899	23.3802	24.4022	23.4122	24.092	24.2578	23.8011	23.5337	23.3318	22.4022	22.99	22.657	22.8715
+	3.66284	-0.762076	O88532	O88532	Zinc finger RNA-binding protein	Zfr	300	Color2 [A=255, R=255, G=140, B=140]	9	4					4	4	4	5	5	5	116.86	0	6.9034	62727000	7	21.4082	21.4391	21.6064	22.1724	22.1037	21.6211	21.6834	21.722	20.9339	21.1718	21.0603	20.8881	21.2264	NaN
+	2.37641	-0.690297	O88967	O88967	ATP-dependent zinc metalloprotease YME1L1	Yme1l1	320	Color2 [A=255, R=255, G=140, B=140]	9	4					9	9	9	16.1	16.1	16.1	80.027	0	16.718	119420000	27	22.2685	22.4709	22.6304	22.851	22.769	22.5634	22.7653	22.1686	22.4573	22.1239	22.046	21.9226	21.3085	21.7477
+	5.21221	-4.13784	P09541	P09541	Myosin light chain 4	Myl4	373	Color2 [A=255, R=255, G=140, B=140]	9	4					12	12	10	77.2	77.2	66.8	21.159	0	153.08	7884200000	139	28.3357	28.335	29.622	28.8967	29.047	29.9614	29.5867	28.6751	26.1333	26.0819	26.0189	24.8867	23.8916	23.9494
+	2.19978	-1.80138	P10400	P10400	Retrovirus-related Pol polyprotein;Reverse transcriptase;Endonuclease	Pol	383	Color2 [A=255, R=255, G=140, B=140]	9	4					3	3	3	30	30	30	13.302	0	3.7148	121410000	9	23.3498	NaN	21.561	23.7422	22.7868	24.2424	23.1615	21.5788	21.1808	21.2286	20.8692	21.2431	20.6987	NaN
+	3.12733	-0.939809	P16045	P16045	Galectin-1	Lgals1	430	Color2 [A=255, R=255, G=140, B=140]	9	4					5	5	5	45.2	45.2	45.2	14.866	0	45.162	930760000	50	25.1221	25.2054	26.3641	25.6006	25.2364	25.495	25.4625	25.4279	25.0958	24.4181	24.5577	24.6736	24.3581	24.8444
+	1.97941	-2.46558	P16406	P16406	Glutamyl aminopeptidase	Enpep	435	Color2 [A=255, R=255, G=140, B=140]	9	4					27	27	27	34.6	34.6	34.6	107.96	0	130.44	1840100000	181	26.1717	26.4853	26.2168	26.4213	26.3418	27.8421	27.5487	26.5865	25.4916	25.8168	26.2448	24.0485	21.8324	22.7296
+	1.89204	-1.13836	P23475	P23475	X-ray repair cross-complementing protein 6	Xrcc6	487	Color2 [A=255, R=255, G=140, B=140]	9	4					7	7	7	12.3	12.3	12.3	69.483	0	8.7912	64136000	15	21.1094	21.4379	21.5191	22.826	21.6353	21.9632	21.8729	21.4218	21.2424	20.9491	21.4038	20.4259	NaN	19.6523
+	3.84595	-0.866788	P28658	P28658	Ataxin-10	Atxn10	536	Color2 [A=255, R=255, G=140, B=140]	9	4					12	12	12	31.6	31.6	31.6	53.706	0	44.56	374050000	57	24.0518	23.9181	24.5934	24.6254	24.0518	24.2881	24.6046	24.3171	23.8884	23.4961	23.0717	23.5943	23.5366	23.6926
+	3.20362	-2.37288	P28667	P28667	MARCKS-related protein	Marcksl1	538	Color2 [A=255, R=255, G=140, B=140]	9	4					2	2	2	14	14	14	20.165	0	4.6997	61830000	16	21.6526	21.389	21.6863	22.2841	22.7182	22.4811	22.5231	21.6776	19.346	NaN	NaN	19.4332	20.7874	NaN
+	2.36728	-1.10189	P28843	P28843	Dipeptidyl peptidase 4;Dipeptidyl peptidase 4 membrane form;Dipeptidyl peptidase 4 soluble form	Dpp4	540	Color2 [A=255, R=255, G=140, B=140]	9	4					13	13	13	22.5	22.5	22.5	87.436	0	68.328	655830000	62	24.8262	24.8687	24.8121	25.1945	24.4091	25.6328	26.0231	24.9696	23.5886	24.3659	24.5372	24.5239	23.7442	23.6701
+	2.96102	-3.01516	P35991;Q60629;Q03145;P29319;Q8CBF3;P54763;P54761;P54754;Q61772;O09127;Q62413	P35991	Tyrosine-protein kinase BTK	Btk	586	Color2 [A=255, R=255, G=140, B=140]	9	4					15	15	15	27.9	27.9	27.9	76.437	0	39.05	315380000	45	23.5331	23.5316	23.5945	25.6658	23.7974	24.9761	24.4044	23.3848	21.7956	22.2491	21.2223	19.8876	NaN	NaN
+	2.44043	-1.00082	P37913	P37913	DNA ligase 1	Lig1	590	Color2 [A=255, R=255, G=140, B=140]	9	4					32	32	32	43.3	43.3	43.3	102.29	0	198.01	1670100000	193	26.2536	26.1145	26.4174	27.1157	25.8166	26.5382	26.6492	26.2897	26.1272	26.0505	25.0844	25.0793	25.1505	25.33
+	2.83972	-1.08552	P42209;Q9Z2Q6;P28661	P42209	Septin-1	2001-09-01	604	Color2 [A=255, R=255, G=140, B=140]	9	4					11	11	11	35	35	35	42.019	0	41.306	1015200000	44	25.5654	25.3504	25.78	25.9696	25.1812	25.654	25.8254	25.6867	25.3907	24.8267	24.5337	24.8616	23.972	23.9991
+	2.53459	-0.952892	P46935	P46935	E3 ubiquitin-protein ligase NEDD4	Nedd4	626	Color2 [A=255, R=255, G=140, B=140]	9	4					6	6	5	8.6	8.6	7.6	102.71	0	10.48	160390000	20	22.7027	22.6972	23.2616	23.6646	22.4637	23.2394	23.2581	22.8526	23.0038	22.1988	21.8368	21.9979	22.1181	21.8673
+	3.69512	-1.10092	P47955	P47955	60S acidic ribosomal protein P1	Rplp1	640	Color2 [A=255, R=255, G=140, B=140]	9	4					3	3	3	66.7	66.7	66.7	11.475	0	104.15	4991400000	44	27.7664	27.9154	28.71	27.9238	28.6436	28.0731	28.4957	27.6724	27.4436	27.2243	27.2122	26.7925	27.1402	27.1002
+	2.89534	-0.639306	P49312	P49312	Heterogeneous nuclear ribonucleoprotein A1;Heterogeneous nuclear ribonucleoprotein A1, N-terminally processed	Hnrnpa1	654	Color2 [A=255, R=255, G=140, B=140]	9	4					17	14	14	52.2	50	50	34.196	0	173.25	6996400000	237	28.1859	28.1069	28.5054	28.1091	28.8547	28.2649	28.7808	28.3898	27.9966	27.9361	28.0547	27.8835	27.5581	27.6399
+	3.0911	-0.850666	P52431	P52431	DNA polymerase delta catalytic subunit	Pold1	683	Color2 [A=255, R=255, G=140, B=140]	9	4					10	10	10	12.6	12.6	12.6	123.79	0	36.654	135160000	28	22.4634	22.5947	22.895	23.2425	22.7604	22.8562	22.7282	22.6167	22.2374	22.1067	22.0091	21.3084	21.9047	22.4289
+	4.3878	-1.71189	P56395	P56395	Cytochrome b5	Cyb5a	721	Color2 [A=255, R=255, G=140, B=140]	9	4					6	6	6	47.8	47.8	47.8	15.241	0	35.268	390630000	49	23.886	24.0176	24.985	25.2518	24.0247	24.4583	24.6487	24.5349	23.7135	23.0081	22.7203	22.982	22.4588	22.7495
+	2.21922	-0.759321	P62960;Q9Z2C8	P62960	Nuclease-sensitive element-binding protein 1	Ybx1	843	Color2 [A=255, R=255, G=140, B=140]	9	4					14	14	11	65.5	65.5	54.3	35.73	0	323.31	4681800000	131	27.7218	27.6591	28.0848	27.7349	28.9158	28.0313	27.8709	27.5165	27.4705	27.1245	26.8564	27.3557	27.4331	27.3582
+	3.21459	-0.67927	P99024	P99024	Tubulin beta-5 chain	Tubb5	974	Color2 [A=255, R=255, G=140, B=140]	9	4					22	4	4	71.8	16	16	49.67	0	179.42	28913000000	123	30.1301	30.2042	30.3886	30.7899	30.1389	30.4832	31.0558	30.6084	30.0428	29.9138	29.9376	29.9342	29.7106	29.85
+	3.57335	-1.11033	P99027	P99027	60S acidic ribosomal protein P2	Rplp2	976	Color2 [A=255, R=255, G=140, B=140]	9	4					7	7	7	91.3	91.3	91.3	11.651	0	269.9	11597000000	129	28.8729	28.892	29.8574	29.4886	30.0201	29.2614	29.3232	28.7982	28.7316	28.3785	28.3481	28.0629	28.1765	28.3893
+	2.90134	-0.983548	Q05CL8	Q05CL8	La-related protein 7	Larp7	1008	Color2 [A=255, R=255, G=140, B=140]	9	4					11	11	11	24.6	24.6	24.6	64.802	0	38.497	247610000	49	23.4156	23.2517	23.763	23.5894	23.9673	23.3475	24.1476	24.1101	23.5154	23.0855	22.5671	22.8905	22.7379	22.2272
+	2.72514	-0.974254	Q5DTM8	Q5DTM8	E3 ubiquitin-protein ligase BRE1A	Rnf20	1140	Color2 [A=255, R=255, G=140, B=140]	9	4					8	8	8	10.2	10.2	10.2	113.52	0	9.5939	89067000	18	21.4928	21.6134	22.3344	22.7129	21.5043	22.1604	22.561	22.4994	21.9532	21.5887	21.2072	21.1215	21.0466	21.0096
+	4.33961	-0.780453	Q60749;Q9WU01	Q60749	KH domain-containing, RNA-binding, signal transduction-associated protein 1	Khdrbs1	1181	Color2 [A=255, R=255, G=140, B=140]	9	4					6	6	6	14	14	14	48.37	0	45.368	1610500000	67	26.0584	25.9801	26.1356	26.4951	26.447	26.292	26.4968	26.5502	25.55	25.9654	25.3259	25.6454	25.4565	25.7907
+	2.47228	-0.926257	Q60848	Q60848	Lymphocyte-specific helicase	Hells	1187	Color2 [A=255, R=255, G=140, B=140]	9	4					13	13	13	19	19	19	95.125	0	103	314520000	46	23.5797	23.7329	23.4274	24.7381	24.0342	24.3567	24.0926	23.7857	23.3155	23.6031	22.5321	23.2921	22.8541	23.2804
+	2.80676	-0.64627	Q60960	Q60960	Importin subunit alpha-5;Importin subunit alpha-5, N-terminally processed	Kpna1	1199	Color2 [A=255, R=255, G=140, B=140]	9	4					6	6	4	13.9	13.9	8.6	60.182	0	17.268	313990000	38	23.4156	23.503	24.3518	24.1304	23.8095	23.75	24.0623	23.8591	23.6822	22.9577	23.2404	23.59	23.1113	23.5039
+	3.28486	-0.778651	Q61191	Q61191	Host cell factor 1;HCF N-terminal chain 1;HCF N-terminal chain 2;HCF N-terminal chain 3;HCF N-terminal chain 4;HCF N-terminal chain 5;HCF N-terminal chain 6;HCF C-terminal chain 1;HCF C-terminal chain 2;HCF C-terminal chain 3;HCF C-terminal chain 4;HCF C-terminal chain 5;HCF C-terminal chain 6	Hcfc1	1222	Color2 [A=255, R=255, G=140, B=140]	9	4					8	8	8	4.7	4.7	4.7	210.43	0	13.492	197430000	23	23.128	22.9647	23.4646	23.865	23.2821	23.312	23.3941	23.355	23.1459	22.5881	22.8329	22.7026	22.219	22.5125
+	1.89644	-1.57803	Q61205	Q61205	Platelet-activating factor acetylhydrolase IB subunit gamma	Pafah1b3	1224	Color2 [A=255, R=255, G=140, B=140]	9	4					4	4	4	22.4	22.4	22.4	25.853	0	4.7884	102120000	18	NaN	22.8914	22.5566	23.0581	22.0919	21.6044	23.237	23.2396	21.8044	NaN	20.5391	NaN	NaN	20.8163
+	3.11153	-0.675606	Q61286	Q61286	Transcription factor 12	Tcf12	1231	Color2 [A=255, R=255, G=140, B=140]	9	4					1	1	1	2.1	2.1	2.1	75.81	0.0056264	1.518	12640000	4	19.1702	NaN	19.2503	19.648	19.1672	19.9087	19.9007	19.5518	19.0616	18.7109	18.7436	18.858	18.9631	19.036
+	3.24046	-3.31841	Q61879	Q61879	Myosin-10	Myh10	1256	Color2 [A=255, R=255, G=140, B=140]	9	4					57	37	35	33.9	24.4	23.5	228.99	0	323.31	958580000	155	25.4671	25.4345	26.0946	26.2985	26.2991	26.8294	26.0432	25.0889	22.3721	23.8201	24.6024	23.8623	20.8843	21.2023
+	3.45177	-0.879429	Q62318	Q62318	Transcription intermediary factor 1-beta	Trim28	1272	Color2 [A=255, R=255, G=140, B=140]	9	4					27	27	27	38.6	38.6	38.6	88.846	0	234.1	5229300000	275	27.8281	27.8189	28.4483	28.2661	27.8464	27.8738	28.5053	28.245	27.7958	27.3028	26.8776	27.2169	27.3339	27.3815
+	3.46403	-1.595	Q62431;A6PWV5	Q62431	AT-rich interactive domain-containing protein 3A	Arid3a	1284	Color2 [A=255, R=255, G=140, B=140]	9	4					6	6	6	12.8	12.8	12.8	64.172	0	12.176	72498000	16	21.8709	21.3233	22.4262	22.6116	21.4283	21.9967	22.7138	22.2368	20.7615	20.2007	NaN	20.7392	20.8609	NaN
+	3.03872	-0.536654	Q64012	Q64012	RNA-binding protein Raly	Raly	1292	Color2 [A=255, R=255, G=140, B=140]	9	4					14	14	14	44.2	44.2	44.2	33.188	0	61.263	1771700000	115	26.3557	26.4134	26.376	26.7854	26.6204	26.3808	26.471	26.3392	26.3409	26.0284	25.8	25.9605	25.9318	25.6914
+	3.02258	-1.51432	Q64287	Q64287	Interferon regulatory factor 4	Irf4	1300	Color2 [A=255, R=255, G=140, B=140]	9	4					6	6	6	17.8	17.8	17.8	51.577	0	9.513	101370000	24	22.1846	21.993	23.29	23.0369	22.1732	22.199	22.5247	22.7873	22.1443	20.2453	21.2448	21.1492	21.5014	20.6402
+	2.25259	-1.38749	Q65Z40	Q65Z40	Wings apart-like protein homolog	Wapal	1314	Color2 [A=255, R=255, G=140, B=140]	9	4					7	7	7	7.8	7.8	7.8	134.07	0	14.471	115840000	19	22.2509	22.4004	22.4047	23.5543	21.7236	22.9828	23.0598	22.5235	22.1799	21.9999	20.3538	20.8793	20.8506	21.6603
+	2.98703	-0.824106	Q6DID3	Q6DID3	Protein SCAF8	Scaf8	1335	Color2 [A=255, R=255, G=140, B=140]	9	4					3	3	3	2.4	2.4	2.4	139.57	0	4.0464	82893000	15	21.859	21.7618	22.0926	22.4781	22.1435	21.816	22.353	22.1382	21.8575	21.6068	20.9296	21.529	20.9467	21.2072
+	2.60265	-0.933758	Q6P9P6	Q6P9P6	Kinesin-like protein KIF11	Kif11	1375	Color2 [A=255, R=255, G=140, B=140]	9	4					33	33	33	35.8	35.8	35.8	118.03	0	198.3	930610000	122	25.3792	25.3512	25.3764	26.3514	25.1391	25.5461	25.6009	25.6472	25.0719	24.9519	23.9759	24.4676	24.7515	24.8397
+	3.5598	-0.790411	Q6PFD9	Q6PFD9	Nuclear pore complex protein Nup98-Nup96;Nuclear pore complex protein Nup98;Nuclear pore complex protein Nup96	Nup98	1394	Color2 [A=255, R=255, G=140, B=140]	9	4					4	4	4	3.2	3.2	3.2	197.24	0	5.5322	41861000	6	20.9282	20.8968	21.6809	21.1893	NaN	NaN	21.3081	21.5169	20.9112	20.7335	20.3675	20.5077	20.6213	20.6593
+	2.45927	-1.20949	Q6PG16	Q6PG16	Holliday junction recognition protein	Hjurp	1397	Color2 [A=255, R=255, G=140, B=140]	9	4					10	10	10	19.5	19.5	19.5	74.198	0	46.333	291920000	50	23.7105	23.5844	23.0775	24.4051	24.5155	23.814	24.0857	24.3224	23.342	23.1788	21.7455	23.0242	22.7381	22.9346
+	2.0839	-0.934384	Q6ZQF0	Q6ZQF0	DNA topoisomerase 2-binding protein 1	Topbp1	1421	Color2 [A=255, R=255, G=140, B=140]	9	4					4	4	4	2.8	2.8	2.8	168.86	0	2.3096	37232000	6	20.6659	20.9047	NaN	21.5962	20.4745	NaN	21.5012	21.4847	20.3254	20.6113	20.0324	19.8725	20.411	20.7261
+	3.40575	-1.05884	Q793I8	Q793I8	TRAF-interacting protein with FHA domain-containing protein A	Tifa	1444	Color2 [A=255, R=255, G=140, B=140]	9	4					4	4	4	25	25	25	21.56	0	10.887	119120000	26	22.2215	22.5981	23.0603	22.576	22.9408	22.4525	22.9862	22.7233	22.3199	21.7019	21.933	21.9396	21.1121	21.3796
+	2.62827	-0.996433	Q80YV2	Q80YV2	Nuclear-interacting partner of ALK	Zc3hc1	1526	Color2 [A=255, R=255, G=140, B=140]	9	4					3	3	3	8.8	8.8	8.8	55.196	0	4.369	49694000	11	21.4896	20.9494	21.8685	22.0661	20.8676	21.219	21.7665	21.5357	21.1132	20.4288	20.3385	20.4007	NaN	20.506
+	3.20506	-0.478611	Q810D6	Q810D6	Glutamate-rich WD repeat-containing protein 1	Grwd1	1531	Color2 [A=255, R=255, G=140, B=140]	9	4					8	8	8	23.5	23.5	23.5	49.223	0	39.204	338280000	64	24.1125	23.7482	24.1966	23.8665	23.9538	24.0921	24.2845	24.2663	23.9345	23.5013	23.6963	23.4795	23.5827	23.5939
+	2.96601	-0.986607	Q8BFY7	Q8BFY7	Protein FAM64A	Fam64a	1540	Color2 [A=255, R=255, G=140, B=140]	9	4					2	2	2	10.4	10.4	10.4	25.686	0	2.7718	28491000	4	19.904	20.1504	20.3642	20.4907	20.957	20.417	21.1432	21.3873	19.5013	19.8288	20.0321	19.7876	19.8832	NaN
+	2.57027	-0.783961	Q8BHJ9	Q8BHJ9	Pre-mRNA-splicing factor SLU7	Slu7	1576	Color2 [A=255, R=255, G=140, B=140]	9	4					9	9	9	16.1	16.1	16.1	68.079	0	12.305	201070000	40	23.2708	23.0055	23.1035	23.6158	23.4183	23.1938	23.8043	23.2836	22.4365	23.3131	22.7915	22.6418	22.3845	22.1483
+	2.84744	-0.902709	Q8BJ71	Q8BJ71	Nuclear pore complex protein Nup93	Nup93	1589	Color2 [A=255, R=255, G=140, B=140]	9	4					11	11	11	14.9	14.9	14.9	93.28	0	19.24	242480000	33	23.4574	23.1756	23.7607	23.9142	23.3699	23.2613	23.9319	24.0107	23.2492	23.2174	22.3513	22.814	22.3475	22.8529
+	2.09393	-1.16973	Q8C6G8	Q8C6G8	WD repeat-containing protein 26	Wdr26	1722	Color2 [A=255, R=255, G=140, B=140]	9	4					1	1	1	1.6	1.6	1.6	70.543	0.0073855	1.397	10921000	3	19.0177	18.7643	20.0605	NaN	NaN	NaN	20.7764	20.1159	19.571	18.8427	NaN	18.9284	19.2493	NaN
+	2.33211	-0.733982	Q8C854	Q8C854	Myelin expression factor 2	Myef2	1729	Color2 [A=255, R=255, G=140, B=140]	9	4					11	11	11	19.6	19.6	19.6	63.294	0	51.873	575550000	65	24.5832	24.6305	25.1558	24.9755	25.0178	24.6505	25.0609	24.6752	24.6953	24.6354	24.0021	24.3826	23.8058	23.6104
+	2.61505	-1.26955	Q8CFI2	Q8CFI2	Ubiquitin-conjugating enzyme E2 R1	Cdc34	1754	Color2 [A=255, R=255, G=140, B=140]	9	4					3	3	3	14.9	14.9	14.9	26.621	0	5.5068	73599000	11	21.5798	21.6017	22.846	22.5935	21.511	21.8059	22.6171	22.3889	21.4252	21.0847	NaN	NaN	20.7715	20.8154
+	2.3992	-1.17726	Q8CII2	Q8CII2	Cell division cycle protein 123 homolog	Cdc123	1786	Color2 [A=255, R=255, G=140, B=140]	9	4					6	6	6	18.8	18.8	18.8	38.816	0	7.0534	73313000	6	21.3346	21.1001	22.1285	22.1702	21.5797	21.644	22.8356	22.7786	21.2943	20.6991	NaN	21.1901	20.8652	NaN
+	3.19888	-0.635503	Q8K310	Q8K310	Matrin-3	Matr3	1835	Color2 [A=255, R=255, G=140, B=140]	9	4					23	23	23	40.2	40.2	40.2	94.629	0	265.58	2623500000	219	26.8647	26.858	26.7972	27.4172	26.9035	27.0337	27.2715	26.9538	26.697	26.5898	26.4603	26.4546	26.123	26.2394
+	3.21036	-0.82138	Q8K409	Q8K409	DNA polymerase beta	Polb	1846	Color2 [A=255, R=255, G=140, B=140]	9	4					4	4	4	14.6	14.6	14.6	38.287	0	5.2667	73036000	13	21.8741	21.9348	21.8811	21.9028	21.9029	22.0604	22.4018	22.1515	21.5888	20.6999	21.2585	21.264	21.3323	NaN
+	3.7597	-0.532092	Q8VDF2;Q7TMI3	Q8VDF2	E3 ubiquitin-protein ligase UHRF1	Uhrf1	1925	Color2 [A=255, R=255, G=140, B=140]	9	4					38	38	38	56.5	56.5	56.5	88.303	0	323.31	12475000000	412	29.093	29.0958	29.2763	29.2042	29.1324	29.5037	29.52	29.456	28.9607	28.884	28.5455	28.9353	28.8031	28.7717
+	3.13856	-1.31505	Q8VDP4	Q8VDP4	Cell cycle and apoptosis regulator protein 2	Ccar2	1934	Color2 [A=255, R=255, G=140, B=140]	9	4					22	22	22	34.6	34.6	34.6	103	0	109.37	939390000	111	25.3684	25.3269	25.9296	26.1632	25.105	25.4571	26.0169	26.0032	25.2643	24.8871	23.7681	24.2247	24.2278	24.4126
+	2.51441	-1.48495	Q8VE92	Q8VE92	RNA-binding protein 4B	Rbm4b	1947	Color2 [A=255, R=255, G=140, B=140]	9	4					11	1	1	33.1	4.5	4.5	39.991	0	2.9624	15014000	4	20.0933	18.7089	19.3963	20.925	20.5029	19.9809	NaN	19.4658	18.7561	18.8456	18.9455	18.4399	NaN	17.859
+	2.48974	-0.617528	Q91VI7	Q91VI7	Ribonuclease inhibitor	Rnh1	1975	Color2 [A=255, R=255, G=140, B=140]	9	4					13	13	13	37.5	37.5	37.5	49.816	0	199.86	617020000	76	24.6686	24.707	25.2548	25.2047	24.764	24.8275	25.0812	25.0434	24.9708	24.5788	23.9808	24.3094	24.2084	24.422
+	2.71079	-1.1726	Q91WM1	Q91WM1	Spermatid perinuclear RNA-binding protein	Strbp	2001	Color2 [A=255, R=255, G=140, B=140]	9	4					12	10	10	19.5	16.2	16.2	73.704	0	15.62	205740000	44	23.269	23.1167	22.8059	23.713	23.8709	23.6096	23.6597	23.5738	23.0687	23.0187	22.4915	21.7615	21.9333	21.9236
+	2.31697	-0.971678	Q91YD3	Q91YD3	mRNA-decapping enzyme 1A	Dcp1a	2013	Color2 [A=255, R=255, G=140, B=140]	9	4					5	5	5	12.5	12.5	12.5	65.218	0	10.636	115140000	12	22.5731	22.2031	22.7826	22.8401	21.9603	22.464	23.2565	22.5768	21.9322	22.2012	21.3013	20.8611	21.9704	21.784
+	2.4617	-1.04046	Q91YU8	Q91YU8	Suppressor of SWI4 1 homolog	Ppan	2027	Color2 [A=255, R=255, G=140, B=140]	9	4					6	6	6	13.4	13.4	13.4	52.755	0	12.317	118180000	23	22.7854	22.6949	23.4029	22.6702	23.1864	23.0072	22.6851	22.4151	22.2836	21.8676	21.2615	NaN	22.0033	NaN
+	4.41193	-0.934445	Q920Q6;Q61474	Q920Q6	RNA-binding protein Musashi homolog 2	Msi2	2036	Color2 [A=255, R=255, G=140, B=140]	9	4					7	7	7	29.5	29.5	29.5	36.938	0	49.898	777800000	56	25.0618	25.2889	25.4452	25.5638	25.4753	25.1531	25.7226	25.3634	24.9012	24.7071	24.524	24.4998	24.1387	24.3459
+	2.30873	-0.725084	Q99JT2;Q99KH8;Q9Z2W1	Q99JT2	Serine/threonine-protein kinase 26	Stk26	2103	Color2 [A=255, R=255, G=140, B=140]	9	4					14	14	14	41.6	41.6	41.6	46.613	0	37.463	633740000	64	24.952	24.9401	25.2721	25.31	24.7373	24.7586	25.1067	25.1432	24.9687	24.7029	24.0346	24.045	23.8879	24.3382
+	2.75165	-1.80096	Q99JV5	Q99JV5	StAR-related lipid transfer protein 4	Stard4	2104	Color2 [A=255, R=255, G=140, B=140]	9	4					1	1	1	5.8	5.8	5.8	25.579	0.00041356	2.2115	9044900	4	19.5482	19.7243	NaN	20.2921	NaN	NaN	20.3519	NaN	NaN	18.4513	18.5908	NaN	NaN	NaN
+	3.5307	-0.583554	Q99KN2	Q99KN2	Probable cytosolic iron-sulfur protein assembly protein CIAO1	Ciao1	2123	Color2 [A=255, R=255, G=140, B=140]	9	4					5	5	5	23.3	23.3	23.3	37.632	0	10.843	81248000	15	21.804	21.7307	22.2978	22.3396	22.1114	21.8812	22.3981	22.1043	21.6759	21.4249	NaN	21.6353	21.5233	21.7666
+	2.52684	-0.685238	Q99LI5	Q99LI5	Zinc finger protein 281	Znf281	2143	Color2 [A=255, R=255, G=140, B=140]	9	4					6	6	6	10.6	10.6	10.6	96.683	0	15.572	134270000	19	22.4744	22.5058	22.3786	23.278	22.392	23.1298	22.8828	22.9524	22.2465	22.3006	21.8033	22.3365	21.9794	22.2359
+	2.83935	-0.752698	Q99M87	Q99M87	DnaJ homolog subfamily A member 3, mitochondrial	Dnaja3	2152	Color2 [A=255, R=255, G=140, B=140]	9	4					5	5	5	15.6	15.6	15.6	52.443	0	59.779	161380000	15	22.671	23.5274	22.5955	23.0666	23.051	22.5234	23.5124	23.3947	22.2055	22.4693	22.2176	22.1385	22.1964	22.4002
+	2.67697	-1.7738	Q99N69	Q99N69	Leupaxin	Lpxn	2162	Color2 [A=255, R=255, G=140, B=140]	9	4					9	9	9	35	35	35	43.478	0	136.51	498720000	44	24.5174	24.4387	25.2537	25.0599	24.7227	24.4003	25.2106	25.1065	23.8034	23.7799	23.5471	23.7204	21.221	23.039
+	4.62327	-2.78785	Q9CPN8;Q5SF07	Q9CPN8	Insulin-like growth factor 2 mRNA-binding protein 3	Igf2bp3	2182	Color2 [A=255, R=255, G=140, B=140]	9	4					20	20	20	41.6	41.6	41.6	63.574	0	124.37	2069300000	152	26.4159	26.3217	27.1645	27.5126	27.2392	26.9309	27.25	26.8723	25.7836	24.5914	22.9754	24.2489	24.3076	24.3354
+	2.429	-1.01452	Q9CPR1	Q9CPR1	RWD domain-containing protein 4	Rwdd4	2187	Color2 [A=255, R=255, G=140, B=140]	9	4					2	2	2	10.6	10.6	10.6	21.137	0.00041425	2.2202	55685000	6	21.3358	21.6356	22.4538	21.5017	NaN	21.8115	21.5944	22.0767	NaN	21.1887	20.5754	NaN	21.0819	20.6463
+	2.42559	-0.647283	Q9CQI6	Q9CQI6	Coactosin-like protein	Cotl1	2232	Color2 [A=255, R=255, G=140, B=140]	9	4					8	8	8	63.4	63.4	63.4	15.944	0	97.275	1231700000	69	25.9122	25.8253	26.4639	26.1832	26.0436	25.5454	25.9447	26.0088	25.8471	25.0744	25.0893	25.301	25.5579	25.4361
+	3.00193	-0.504174	Q9CWE0	Q9CWE0	Mitochondrial fission regulator 1-like	Mtfr1l	2287	Color2 [A=255, R=255, G=140, B=140]	9	4					2	2	2	8.7	8.7	8.7	31.726	0	3.3545	32990000	8	20.5952	21.0778	20.913	21.0782	NaN	20.6491	20.9495	20.9916	20.4905	20.5917	20.2406	20.478	NaN	20.2597
+	3.0326	-0.718947	Q9CWF2	Q9CWF2	Tubulin beta-2B chain	Tubb2b	2288	Color2 [A=255, R=255, G=140, B=140]	9	4					23	8	2	72.6	28.3	3.6	49.953	0	104.64	13170000000	143	28.7232	28.7378	29.067	29.7721	28.966	29.1305	29.4288	28.8195	28.4841	28.7625	28.2934	28.4719	28.4252	28.433
+	3.09435	-0.70768	Q9CWK3	Q9CWK3	CD2 antigen cytoplasmic tail-binding protein 2	Cd2bp2	2291	Color2 [A=255, R=255, G=140, B=140]	9	4					3	3	3	10.2	10.2	10.2	37.694	0	3.9027	72826000	9	21.8141	21.4634	21.9924	22.3536	22.1575	21.5508	22.1901	22.0376	21.4958	21.525	21.283	21.3089	21.0841	NaN
+	3.07129	-0.641683	Q9CX86	Q9CX86	Heterogeneous nuclear ribonucleoprotein A0	Hnrnpa0	2306	Color2 [A=255, R=255, G=140, B=140]	9	4					8	8	8	41.3	41.3	41.3	30.53	0	232.22	4790600000	84	27.7069	27.8911	28.2115	27.8132	28.007	27.7589	28.1953	28.0236	27.7385	27.645	27.3791	27.1816	27.1082	27.1072
+	2.78114	-0.62958	Q9CXY6	Q9CXY6	Interleukin enhancer-binding factor 2	Ilf2	2323	Color2 [A=255, R=255, G=140, B=140]	9	4					11	11	11	46.9	46.9	46.9	43.062	0	71.542	563060000	68	24.7293	24.7254	24.4741	24.7552	25.2481	24.9162	25.1336	24.9813	24.4967	24.0897	23.9432	24.2554	24.4814	24.4646
+	2.47474	-0.702489	Q9CY97	Q9CY97	RNA polymerase II subunit A C-terminal domain phosphatase SSU72	Ssu72	2332	Color2 [A=255, R=255, G=140, B=140]	9	4					4	4	4	20.6	20.6	20.6	22.517	0	7.1045	74981000	13	21.448	21.791	22.2767	21.9413	22.1175	22.2769	21.989	22.4221	21.98	21.3475	NaN	21.2299	21.0332	21.7499
+	3.52637	-1.1662	Q9D0B6	Q9D0B6	Protein PBDC1	Pbdc1	2375	Color2 [A=255, R=255, G=140, B=140]	9	4					9	9	9	50	50	50	22.223	0	22.423	369610000	49	23.9044	24.1305	24.8325	24.4327	23.6368	24.2193	24.7359	24.649	23.7882	23.1235	23.0198	23.0927	23.1106	23.3744
+	2.54018	-0.769008	Q9D0E1;Q91VC4	Q9D0E1	Heterogeneous nuclear ribonucleoprotein M	Hnrnpm	2378	Color2 [A=255, R=255, G=140, B=140]	9	4					40	40	40	59.4	59.4	59.4	77.648	0	212.76	18841000000	478	29.6424	29.6278	29.5809	30.3783	30.0428	29.7801	29.9771	29.6914	29.7389	29.4384	28.9287	29.1564	28.7729	28.8012
+	3.61999	-1.00448	Q9D1C1	Q9D1C1	Ubiquitin-conjugating enzyme E2 C	Ube2c	2404	Color2 [A=255, R=255, G=140, B=140]	9	4					4	4	4	30.7	30.7	30.7	19.606	0	26.425	234780000	34	23.2564	23.3635	23.9568	23.4356	23.3235	23.7225	24.2043	23.9186	23.2832	22.5118	22.8068	22.5198	22.8037	22.6089
+	2.39364	-0.914961	Q9D2V7	Q9D2V7	Coronin-7	Coro7	2431	Color2 [A=255, R=255, G=140, B=140]	9	4					14	14	14	22.5	22.5	22.5	100.81	0	30.938	444080000	73	24.2914	24.2864	24.8587	24.852	24.8681	24.2816	24.4933	24.6183	24.615	24.1078	23.0874	23.7711	23.5863	23.3145
+	2.4788	-0.704808	Q9D720	Q9D720	Non-structural maintenance of chromosomes element 1 homolog	Nsmce1	2452	Color2 [A=255, R=255, G=140, B=140]	9	4					3	3	3	15.4	15.4	15.4	30.708	0	3.8052	77663000	17	21.5307	21.7881	22.7039	21.9182	21.6659	22.0862	22.1903	21.9123	21.7757	21.3675	21.0145	21.2189	21.2532	21.618
+	4.22212	-0.527686	Q9D824	Q9D824	Pre-mRNA 3-end-processing factor FIP1	Fip1l1	2467	Color2 [A=255, R=255, G=140, B=140]	9	4					7	7	7	24.4	24.4	24.4	64.958	0	167.64	351890000	58	24.0556	23.9774	24.0256	24.1433	24.2483	24.2492	24.2172	24.1626	23.6092	23.9278	23.6278	23.7614	23.4356	23.5183
+	3.2912	-0.537877	Q9D880	Q9D880	Mitochondrial import inner membrane translocase subunit TIM50	Timm50	2469	Color2 [A=255, R=255, G=140, B=140]	9	4					8	8	8	27.8	27.8	27.8	39.776	0	63.739	800720000	76	25.0282	25.0004	25.2928	25.5382	25.1447	25.4438	25.6964	25.299	24.9415	25.0464	24.7044	25.0171	24.8561	24.622
+	2.28057	-1.75717	Q9DAI2	Q9DAI2	Intraflagellar transport protein 22 homolog	Ift22	2491	Color2 [A=255, R=255, G=140, B=140]	9	4					7	7	7	57.3	57.3	57.3	20.833	0	45.794	218560000	19	23.2363	23.0189	24.3042	24.1524	22.7781	22.8191	24.3337	23.824	23.8304	21.4015	21.0603	21.7285	21.9129	21.7349
+	2.26581	-0.927866	Q9DBX2	Q9DBX2	Phosducin-like protein	Pdcl	2525	Color2 [A=255, R=255, G=140, B=140]	9	4					4	4	4	14	14	14	34.406	0	8.4666	53963000	16	21.5488	20.8285	21.8549	22.2954	20.8391	21.3778	21.4709	21.9845	21.1623	20.5972	NaN	20.5895	20.6587	20.5384
+	3.56225	-0.540721	Q9DBY8	Q9DBY8	Nuclear valosin-containing protein-like	Nvl	2526	Color2 [A=255, R=255, G=140, B=140]	9	4					16	16	16	22.2	22.2	22.2	94.475	0	50.688	551760000	125	24.7327	24.5247	24.7278	24.8832	24.7221	24.8128	25.1397	24.6279	24.216	24.5913	24.2009	24.3151	24.1527	24.1933
+	2.17381	-0.829391	Q9EPV8	Q9EPV8	Ubiquitin-like protein 5	Ubl5	2556	Color2 [A=255, R=255, G=140, B=140]	9	4					3	3	3	56.2	56.2	56.2	8.5468	0	4.5348	78874000	8	21.7009	22.1192	21.8283	22.5073	21.4082	22.1464	22.6147	21.6416	21.2687	21.2452	21.1117	21.785	20.713	21.0465
+	2.66062	-1.01987	Q9EQ32	Q9EQ32	Phosphoinositide 3-kinase adapter protein 1	Pik3ap1	2558	Color2 [A=255, R=255, G=140, B=140]	9	4					14	14	14	23.1	23.1	23.1	90.927	0	29.95	502730000	79	24.5288	24.4713	24.8624	25.142	24.1301	24.6857	25.2456	24.8642	23.7093	23.3092	23.2216	24.0309	24.2164	24.3234
+	2.56738	-0.798566	Q9EQM6	Q9EQM6	Microprocessor complex subunit DGCR8	Dgcr8	2564	Color2 [A=255, R=255, G=140, B=140]	9	4					5	5	5	7.8	7.8	7.8	86.32	0	15.287	58520000	25	21.395	21.3512	21.5391	21.488	22.1306	21.8189	21.9525	21.2907	20.8776	21.3292	21.0003	21.2809	20.5487	20.3918
+	2.36513	-1.54863	Q9ERS5	Q9ERS5	Pleckstrin homology domain-containing family A member 2	Plekha2	2583	Color2 [A=255, R=255, G=140, B=140]	9	4					11	11	11	35.1	35.1	35.1	47.379	0	108.97	445480000	43	24.2495	23.9544	24.1249	25.8058	24.1787	24.3215	24.246	24.5941	23.7818	23.8882	21.7107	22.6072	23.1977	22.7935
+	2.94523	-0.642073	Q9EST3	Q9EST3	Eukaryotic translation initiation factor 4E transporter	Eif4enif1	2589	Color2 [A=255, R=255, G=140, B=140]	9	4					6	6	6	7.3	7.3	7.3	107.98	0	10.207	104480000	17	22.073	21.8674	22.8626	22.3614	22.3454	22.0167	22.6116	22.4867	21.8017	22.1754	21.6211	21.6863	21.8692	21.6783
+	2.40986	-0.757461	Q9JKY0	Q9JKY0	Cell differentiation protein RCD1 homolog	Rqcd1	2648	Color2 [A=255, R=255, G=140, B=140]	9	4					8	8	8	31.8	31.8	31.8	33.601	0	19.142	184970000	30	22.3271	23.2168	23.6688	23.3406	22.5704	23.0321	23.5069	23.4989	22.9918	22.6885	22.434	22.459	22.3166	22.183
+	1.63253	-2.10106	Q9JLZ6	Q9JLZ6	Hypermethylated in cancer 2 protein	Hic2	2657	Color2 [A=255, R=255, G=140, B=140]	9	4					1	1	1	1.6	1.6	1.6	66.766	0	2.6449	65520000	12	21.2432	21.5162	22.773	20.9232	22.2981	23.1252	22.5006	NaN	NaN	19.9132	20.5327	NaN	NaN	NaN
+	4.52734	-0.402186	Q9QX47	Q9QX47	Protein SON	Son	2678	Color2 [A=255, R=255, G=140, B=140]	9	4					25	25	25	15.3	15.3	15.3	265.65	0	114.31	1095100000	128	25.5441	25.5112	25.7195	25.77	25.56	25.8607	25.8594	25.8368	25.3255	25.3724	25.3092	25.3255	25.5072	25.3536
+	2.43332	-0.855838	Q9QYS9	Q9QYS9	Protein quaking	Qki	2704	Color2 [A=255, R=255, G=140, B=140]	9	4					7	7	7	24.9	24.9	24.9	37.67	0	8.4031	243200000	33	23.4405	23.2436	24.2025	24.0329	23.1949	23.5671	24.1215	23.5748	23.3609	23.0827	23.0446	22.9705	22.1977	22.9022
+	3.13634	-0.832802	Q9QZH3	Q9QZH3	Peptidyl-prolyl cis-trans isomerase E	Ppie	2708	Color2 [A=255, R=255, G=140, B=140]	9	4					9	9	9	38.9	38.9	38.9	33.448	0	17.324	737860000	27	25.0712	25.0774	25.6653	25.3326	24.9493	25.3259	25.5058	25.6612	25.0938	24.4625	24.3541	24.8758	24.3176	24.3395
+	3.04916	-1.0699	Q9QZK7	Q9QZK7	Docking protein 3	Dok3	2709	Color2 [A=255, R=255, G=140, B=140]	9	4					6	6	6	16.2	16.2	16.2	48.027	0	13.065	148890000	24	22.644	22.2478	23.3791	23.2812	22.8807	22.9788	23.1347	23.0924	22.7341	22.3191	21.9371	21.2182	21.7728	22.3462
+	2.2009	-0.796343	Q9QZQ8	Q9QZQ8	Core histone macro-H2A.1	H2afy	2711	Color2 [A=255, R=255, G=140, B=140]	9	4					19	19	17	59.9	59.9	53	39.735	0	323.31	24171000000	404	30.0044	30.0058	29.9487	30.8005	30.6266	30.5538	30.0669	30.049	29.4478	29.2722	28.9479	29.6997	30.2327	29.6671
+	3.91419	-0.477808	Q9R1C7;Q80W14	Q9R1C7	Pre-mRNA-processing factor 40 homolog A	Prpf40a	2730	Color2 [A=255, R=255, G=140, B=140]	9	4					20	20	20	23.1	23.1	23.1	108.48	0	173.67	1423800000	114	25.8728	25.9107	26.1901	26.2729	26.0857	25.8875	26.3402	26.168	25.7951	25.7742	25.6838	25.7047	25.6268	25.493
+	3.32915	-0.694134	Q9WV80	Q9WV80	Sorting nexin-1	Snx1	2772	Color2 [A=255, R=255, G=140, B=140]	9	4					9	7	7	19.7	15.7	15.7	58.951	0	13.331	136250000	39	22.6575	22.4989	22.9755	22.7863	22.4066	22.9631	22.8711	23.0992	22.5545	22.2541	21.88	22.0473	22.1384	22.0628
+	3.15288	-0.651309	Q9Z108	Q9Z108	Double-stranded RNA-binding protein Staufen homolog 1	Stau1	2797	Color2 [A=255, R=255, G=140, B=140]	9	4					8	8	8	18.7	18.7	18.7	53.924	0	26	249070000	49	23.2397	23.5775	23.8867	23.6094	23.9831	23.5215	23.7904	23.673	23.1447	23.279	23.1798	23.223	22.5259	23.2041
+	3.0089	-0.637841	Q9Z1M8	Q9Z1M8	Protein Red	Ik	2810	Color2 [A=255, R=255, G=140, B=140]	9	4					7	7	7	14	14	14	65.615	0	12.678	213680000	47	23.3554	22.9494	23.7395	23.4444	23.3403	23.0638	23.7191	23.589	22.9303	23.1451	22.7478	23.0002	22.5313	22.7144
+	4.24025	-0.690154	Q9Z204;Q8BTF8	Q9Z204	Heterogeneous nuclear ribonucleoproteins C1/C2	Hnrnpc	2821	Color2 [A=255, R=255, G=140, B=140]	9	4					15	15	15	60.4	60.4	60.4	34.384	0	223.4	8940200000	192	28.574	28.6	29.0039	28.7478	28.8904	28.6548	29.0584	29.0305	28.5019	28.3637	27.9991	28.1712	28.0324	28.1766
+	3.02049	-0.646397	Q9Z2X1	Q9Z2X1	Heterogeneous nuclear ribonucleoprotein F;Heterogeneous nuclear ribonucleoprotein F, N-terminally processed	Hnrnpf	2840	Color2 [A=255, R=255, G=140, B=140]	9	4					16	16	13	52.8	52.8	46.3	45.729	0	323.31	13275000000	274	29.192	29.0616	29.4137	29.703	29.2465	29.2172	29.5918	29.3467	29.1742	29.0463	28.5471	28.744	28.4479	28.681

## Sheet: Up in Male chr X
Significant	#NAME?	Difference	Protein IDs	Majority protein IDs	Protein names	Gene names	id	Symbol color	Symbol type	Symbol size	Show label	Only identified by site	Reverse	Potential contaminant	Peptides	Razor + unique peptides	Unique peptides	Sequence coverage [%]	Unique + razor sequence coverage [%]	Unique sequence coverage [%]	Mol. weight [kDa]	Q-value	Score	Intensity	MS/MS count	LFQ intensity FMpool_01	LFQ intensity FMpool_02	LFQ intensity X_F1	LFQ intensity X_F2	LFQ intensity X_F3	LFQ intensity X_F4	LFQ intensity X_F5	LFQ intensity X_F6	LFQ intensity X_M1	LFQ intensity X_M2	LFQ intensity X_M3	LFQ intensity X_M4	LFQ intensity X_M5	LFQ intensity X_M6
+	2.11202	1.02126	A2AL36	A2AL36	Centriolin	Cntrl	12	Color2 [A=255, R=140, G=140, B=255]	9	4					75	75	75	38.2	38.2	38.2	268.88	0	323.31	3726600000	477	27.3605	27.3421	25.8681	26.6551	26.8961	27.3789	26.6634	26.6216	27.0749	28.0357	28.6616	27.6542	27.2986	27.4857
+	2.68178	0.612781	A2BH40;E9Q4N7	A2BH40	AT-rich interactive domain-containing protein 1A	Arid1a	23	Color2 [A=255, R=140, G=140, B=255]	9	4					21	21	21	12.1	12.1	12.1	242.09	0	85.055	639480000	131	24.7396	24.9446	24.3928	24.2793	24.5416	24.7725	24.1629	24.846	24.7768	24.88	25.3258	25.1617	25.3941	25.1334
+	2.39013	0.654465	E9PVX6	E9PVX6		Mki67	130	Color2 [A=255, R=140, G=140, B=255]	9	4					164	164	164	63.5	63.5	63.5	350.86	0	323.31	62241000000	1948	31.3353	31.3371	30.5662	31.1571	31.2315	31.5015	30.9026	30.7839	31.4206	31.5443	31.4978	31.5951	32.1214	31.8904
+	1.75726	1.35585	E9Q6J5	E9Q6J5		Bod1l	143	Color2 [A=255, R=140, G=140, B=255]	9	4					15	15	15	6.4	6.4	6.4	327.45	0	17.228	149980000	26	22.7119	22.37	NaN	21.4767	20.8246	22.2432	22.339	22.7841	22.4516	22.4403	23.4953	23.1451	24.3494	23.8546
+	2.22758	1.59093	O08842	O08842	GDNF family receptor alpha-2	Gfra2	178	Color2 [A=255, R=140, G=140, B=255]	9	4					4	4	4	9.1	9.1	9.1	51.726	0	6.2855	70370000	8	21.1607	21.3089	NaN	21.0162	20.8874	20.5125	20.1624	NaN	21.3575	22.8016	23.4548	22.3022	21.6502	21.8471
+	3.23114	1.1257	O35207;Q9CPY4	O35207;Q9CPY4	Cyclin-dependent kinase 2-associated protein 1;Cyclin-dependent kinase 2-associated protein 2	Cdk2ap1;Cdk2ap2	199	Color2 [A=255, R=140, G=140, B=255]	9	4					2	2	2	18.4	18.4	18.4	12.354	0	3.548	113290000	12	22.4374	22.3137	21.7587	21.1489	21.766	NaN	21.9309	22.0683	22.1968	22.9584	23.2078	22.698	23.0553	23.0453
+	1.97493	1.09953	O55143;Q8R429;Q64518	O55143	Sarcoplasmic/endoplasmic reticulum calcium ATPase 2	Atp2a2	261	Color2 [A=255, R=140, G=140, B=255]	9	4					16	16	16	18.4	18.4	18.4	114.86	0	32.799	716380000	88	24.7158	24.9009	23.2931	25.1718	24.3023	24.3736	24.3233	24.3504	25.1414	25.01	24.7028	25.2308	26.2272	26.0994
+	6.36709	4.96742	P01872	P01872	Ig mu chain C region	Ighm	331	Color2 [A=255, R=140, G=140, B=255]	9	4					12	12	12	30.8	30.8	30.8	49.971	0	55.362	523530000	57	24.5887	24.4281	NaN	19.971	NaN	20.1047	21.0926	20.6272	25.9088	26.2115	25.0858	25.249	24.8659	25.1767
+	3.66897	1.02661	P01899;P01897;P01898;P01896;P14427;P06339;P01902	P01899;P01897	H-2 class I histocompatibility antigen, D-B alpha chain;H-2 class I histocompatibility antigen, L-D alpha chain	H2-D1;H2-L	333	Color2 [A=255, R=140, G=140, B=255]	9	4					11	11	6	34.3	34.3	19.9	40.836	0	20.878	577850000	107	24.6304	24.6795	24.6249	23.8977	24.053	24.1196	24.17	23.865	24.9021	24.9111	24.8045	25.1135	25.5148	25.6439
+	4.36777	1.80805	P01901;P14426;P14428;P03991;P04223	P01901;P14426;P14428;P03991;P04223	H-2 class I histocompatibility antigen, K-B alpha chain;H-2 class I histocompatibility antigen, D-K alpha chain;H-2 class I histocompatibility antigen, K-Q alpha chain;H-2 class I histocompatibility antigen, K-W28 alpha chain;H-2 class I histocompatibility antigen, K-K alpha chain	H2-K1;H2-D1	334	Color2 [A=255, R=140, G=140, B=255]	9	4					8	6	4	27.1	22	16.8	41.301	0	8.411	97175000	22	22.3256	21.8811	21.18	20.4277	20.8564	21.1994	20.6317	20.3193	22.9559	22.1454	21.9099	22.3394	23.2572	22.8549
+	2.13211	1.94903	P04925	P04925	Major prion protein	Prnp	341	Color2 [A=255, R=140, G=140, B=255]	9	4					3	3	3	11.8	11.8	11.8	27.977	0	2.3177	37418000	3	20.6056	20.5241	NaN	NaN	19.5564	19.932	19.1169	19.9061	NaN	22.3464	21.7688	22.6383	20.4829	20.648
+	2.52311	1.27983	P05627	P05627	Transcription factor AP-1	Jun	347	Color2 [A=255, R=140, G=140, B=255]	9	4					3	3	3	12.9	12.9	12.9	35.943	0	15.896	138220000	16	22.7604	21.9583	22.1726	21.5433	21.5662	22.2752	21.3657	21.4534	21.9464	23.426	23.8204	23.5367	22.6722	22.6537
+	2.51366	0.738119	P08113	P08113	Endoplasmin	Hsp90b1	362	Color2 [A=255, R=140, G=140, B=255]	9	4					33	31	31	48.1	46	46	92.475	0	323.31	4988900000	291	27.7861	27.7781	27.7112	27.4151	27.2686	27.558	27.5186	26.9528	27.8615	27.6773	27.9987	28.1253	28.6545	28.5356
+	2.67958	0.794185	P09528	P09528	Ferritin heavy chain;Ferritin heavy chain, N-terminally processed	Fth1	372	Color2 [A=255, R=140, G=140, B=255]	9	4					9	9	9	52.2	52.2	52.2	21.066	0	22.714	996060000	78	25.4753	25.4225	24.9648	24.9802	24.5099	25.498	24.9669	24.4514	25.7517	26.1656	25.4777	25.3495	25.6985	25.6933
+	5.47256	2.67348	P10922	P10922	Histone H1.0;Histone H1.0, N-terminally processed	H1f0	390	Color2 [A=255, R=140, G=140, B=255]	9	4					3	3	3	17.5	17.5	17.5	20.861	0	8.1944	178760000	28	22.4999	22.5954	20.6162	20.5078	20.5163	20.2434	20.3481	21.0905	23.7182	22.3447	22.5922	23.2129	24.0026	23.4927
+	4.73289	1.5495	P11911	P11911	B-cell antigen receptor complex-associated protein alpha chain	Cd79a	398	Color2 [A=255, R=140, G=140, B=255]	9	4					4	4	4	28.6	28.6	28.6	24.583	0	18.334	274110000	21	23.5976	23.6639	22.3877	22.9436	21.9604	22.512	23.3006	22.5998	24.2987	23.9849	24.079	24.1381	24.0195	24.481
+	1.81836	1.37753	P13373;P13372	P13373;P13372	Immunoglobulin omega chain;Immunoglobulin iota chain	Vpreb2;Vpreb1	405	Color2 [A=255, R=140, G=140, B=255]	9	4					2	2	2	11.3	11.3	11.3	16.052	0.0041969	1.6132	248750000	12	23.3905	23.5093	23.2593	23.0327	22.5046	20.3958	23.3768	22.5574	23.5241	24.4957	23.661	24.0025	23.7265	23.982
+	2.09983	0.799213	P15066	P15066	Transcription factor jun-D	Jund	422	Color2 [A=255, R=140, G=140, B=255]	9	4					3	3	3	17	17	17	34.904	0	50.06	89068000	20	21.9024	21.9116	21.577	21.7079	20.849	21.5529	21.4076	21.8741	22.4272	22.7557	22.7518	21.4817	22.1978	22.1496
+	3.02106	2.16534	P15530	P15530	B-cell antigen receptor complex-associated protein beta chain	Cd79b	425	Color2 [A=255, R=140, G=140, B=255]	9	4					2	2	2	10.5	10.5	10.5	25.726	0.0074156	1.4214	50746000	4	21.1638	21.3312	NaN	NaN	NaN	20.1669	NaN	19.5816	22.7707	22.3928	21.8136	21.7269	21.6284	21.9051
+	4.1203	0.9827	P20029	P20029	78 kDa glucose-regulated protein	Hspa5	472	Color2 [A=255, R=140, G=140, B=255]	9	4					34	34	32	57.9	57.9	57.9	72.421	0	323.31	14224000000	427	29.3101	29.2566	28.9561	28.6109	28.3493	28.8905	28.7663	28.8837	29.5288	29.4079	29.6006	29.6249	30.1328	30.058
+	2.8802	0.758811	P24270;Q8BI29	P24270	Catalase	Cat	492	Color2 [A=255, R=140, G=140, B=255]	9	4					18	18	18	40	40	40	59.795	0	27.46	1195300000	100	25.7972	25.582	25.3813	25.116	25.0269	25.3841	25.1021	25.8404	25.6783	25.9498	25.8024	26.3294	26.2864	26.3571
+	3.73603	0.751457	P26443	P26443	Glutamate dehydrogenase 1, mitochondrial	Glud1	514	Color2 [A=255, R=140, G=140, B=255]	9	4					7	7	7	14.7	14.7	14.7	61.336	0	15.734	236520000	62	23.4798	23.474	22.9526	23.1536	22.7218	23.2044	22.864	22.9547	23.7663	23.4083	23.3892	23.9157	23.9937	23.8866
+	3.37797	1.09118	P27773	P27773	Protein disulfide-isomerase A3	Pdia3	525	Color2 [A=255, R=140, G=140, B=255]	9	4					24	24	24	56.2	56.2	56.2	56.678	0	144.93	2853300000	207	27.0186	26.9476	26.5678	26.333	26.1878	26.707	26.6074	25.7934	27.186	26.9043	27.4161	27.4621	27.9541	27.821
+	2.30102	0.740168	P28063	P28063	Proteasome subunit beta type-8	Psmb8	529	Color2 [A=255, R=140, G=140, B=255]	9	4					3	3	3	13.8	13.8	13.8	30.26	0	4.341	69214000	17	NaN	21.9161	21.407	21.379	21.3666	21.6354	21.3119	20.9471	21.9202	21.4057	22.001	21.9684	22.5994	22.5934
+	2.51057	0.937459	P31786	P31786	Acyl-CoA-binding protein	Dbi	554	Color2 [A=255, R=140, G=140, B=255]	9	4					2	2	2	39.1	39.1	39.1	10	0	6.3133	201180000	15	23.4799	23.2636	22.5636	22.6544	22.194	23.0424	22.9334	22.1899	23.6751	22.7358	23.4224	23.4396	23.7877	24.1418
+	2.47194	0.765015	P49710	P49710	Hematopoietic lineage cell-specific protein	Hcls1	657	Color2 [A=255, R=140, G=140, B=255]	9	4					7	7	7	18.1	18.1	18.1	54.24	0	20.787	463860000	64	24.2799	24.3417	23.9304	23.9315	23.8414	24.2723	24.1085	23.6849	24.2197	24.4007	24.6644	24.575	25.4154	25.0839
+	2.99874	0.796077	P97384	P97384	Annexin A11	Anxa11	948	Color2 [A=255, R=140, G=140, B=255]	9	4					8	8	8	18.9	18.9	18.9	54.079	0	17.415	222300000	50	23.3516	23.1374	22.8666	22.7115	22.7651	23.0462	23.3613	22.6513	23.6357	23.0855	23.7133	23.8293	24.0636	23.851
+	2.79021	0.524258	P99028	P99028	Cytochrome b-c1 complex subunit 6, mitochondrial	Uqcrh	977	Color2 [A=255, R=140, G=140, B=255]	9	4					1	1	1	20.2	20.2	20.2	10.435	0	3.2476	42584000	2	21.1067	21.2882	NaN	21.0112	21.2582	20.9744	21.0031	21.0442	NaN	NaN	21.662	21.5177	21.8096	21.3404
+	3.73036	0.797705	Q01147	Q01147	Cyclic AMP-responsive element-binding protein 1	Creb1	984	Color2 [A=255, R=140, G=140, B=255]	9	4					4	4	2	10.3	10.3	5.6	36.674	0	18.847	954190000	30	25.3015	25.4793	24.9997	24.8198	24.5669	25.2442	24.8856	25.1348	25.7612	25.8796	26.1385	25.5906	25.5572	25.51
+	2.45047	0.710681	Q05816	Q05816	Fatty acid-binding protein, epidermal	Fabp5	1007	Color2 [A=255, R=140, G=140, B=255]	9	4					5	5	5	37.8	37.8	37.8	15.137	0	33.95	456480000	66	24.3295	24.4094	24.294	23.6915	23.777	23.7222	24.1523	24.025	24.7172	24.2215	24.133	24.8615	24.9676	25.0253
+	3.63773	0.669267	Q3U7R1	Q3U7R1	Extended synaptotagmin-1	Esyt1	1070	Color2 [A=255, R=140, G=140, B=255]	9	4					14	14	14	17.3	17.3	17.3	121.55	0	30.228	290980000	63	23.7136	23.8276	22.9741	23.4427	23.0513	23.3279	23.3253	23.4087	24.1585	23.8576	24.1769	23.9568	23.7805	23.6154
+	1.81932	1.20362	Q60870	Q60870	Receptor expression-enhancing protein 5	Reep5	1191	Color2 [A=255, R=140, G=140, B=255]	9	4					1	1	1	5.4	5.4	5.4	21.05	0	2.892	12156000	7	18.9123	19.6718	NaN	NaN	NaN	19.2265	18.7372	18.5331	19.1206	NaN	19.9967	20.3432	20.2125	20.5065
+	2.52135	0.903138	Q61029	Q61029	Lamina-associated polypeptide 2, isoforms beta/delta/epsilon/gamma	Tmpo	1206	Color2 [A=255, R=140, G=140, B=255]	9	4					23	12	12	62.4	33.4	33.4	50.372	0	279.82	11389000000	216	28.9651	28.9053	27.5537	28.2374	28.3839	29.0376	28.3567	28.8831	29.079	29.0544	29.594	29.403	29.2763	29.4644
+	2.20935	0.742157	Q61103	Q61103	Zinc finger protein ubi-d4	Dpf2	1213	Color2 [A=255, R=140, G=140, B=255]	9	4					4	4	4	13.8	13.8	13.8	44.229	0	29.887	297110000	31	23.8378	23.7611	23.0682	22.9712	23.0432	23.6501	23.2505	23.8195	23.4884	23.6127	24.2793	24.1616	24.3884	24.3253
+	3.99732	0.593745	Q61687	Q61687	Transcriptional regulator ATRX	Atrx	1246	Color2 [A=255, R=140, G=140, B=255]	9	4					68	68	68	31.6	31.6	31.6	278.58	0	323.31	5750800000	526	27.9441	28.0088	27.497	27.6005	27.5159	27.7303	27.7251	27.8172	28.5729	28.255	28.3373	28.0483	28.1594	28.0756
+	4.26474	1.19393	Q62511	Q62511	E3 ubiquitin-protein ligase ZFP91	Zfp91	1288	Color2 [A=255, R=140, G=140, B=255]	9	4					3	3	3	5.6	5.6	5.6	63.388	0	4.4969	63544000	8	20.7518	21.2761	NaN	21.0471	21.1129	20.6457	20.8652	20.783	22.2451	22.0156	21.528	22.1844	22.0192	22.5159
+	2.17236	0.844101	Q6P2L6	Q6P2L6	Histone-lysine N-methyltransferase NSD3	Whsc1l1	1360	Color2 [A=255, R=140, G=140, B=255]	9	4					7	7	7	7.3	7.3	7.3	161	0	15.925	129520000	21	22.6818	22.5458	21.6548	21.4992	21.5149	22.6205	22.1501	22.2917	22.596	23.217	22.8632	22.8472	22.1446	23.1278
+	2.69633	0.782716	Q6PDG5	Q6PDG5	SWI/SNF complex subunit SMARCC2	Smarcc2	1387	Color2 [A=255, R=140, G=140, B=255]	9	4					25	16	16	24.5	17.1	17.1	132.6	0	121.4	954840000	106	25.4339	25.4468	24.5476	24.7684	24.8624	25.0325	25.0984	25.3924	25.1134	25.6522	25.8264	25.6762	25.9585	26.1712
+	2.18893	1.0442	Q7TT79	Q7TT79	Microcephalin	Mcph1	1477	Color2 [A=255, R=140, G=140, B=255]	9	4					2	2	2	3.5	3.5	3.5	90.372	0	3.5551	21041000	4	19.9685	20.4132	19.3589	20.1138	NaN	20.0024	19.3462	19.8429	20.2444	NaN	NaN	20.585	21.3051	20.9736
+	2.74565	1.08323	Q80WJ7	Q80WJ7	Protein LYRIC	Mtdh	1507	Color2 [A=255, R=140, G=140, B=255]	9	4					25	25	25	48.9	48.9	48.9	63.845	0	323.31	8029800000	349	28.4271	28.3637	27.261	27.3316	27.5486	28.2304	27.6945	28.6088	28.8348	28.4734	28.7704	28.5737	29.2945	29.2275
+	2.551	0.979775	Q80X32	Q80X32	UPF0461 protein C5orf24 homolog		1510	Color2 [A=255, R=140, G=140, B=255]	9	4					2	2	2	16.5	16.5	16.5	20.139	0	16.58	109270000	15	22.4758	22.0406	21.3084	21.2475	21.978	22.3793	21.5903	21.9286	22.4225	22.1565	22.5202	22.8175	23.1904	23.2038
+	2.34791	0.844984	Q8BH04	Q8BH04	Phosphoenolpyruvate carboxykinase [GTP], mitochondrial	Pck2	1563	Color2 [A=255, R=140, G=140, B=255]	9	4					19	19	19	40	40	40	70.527	0	112.46	780160000	100	25.2779	25.1775	25.3189	24.6836	24.2204	24.4398	24.7144	24.2917	26.0621	25.1758	24.8934	25.4093	25.5516	25.6466
+	3.50395	0.723645	Q8BTM8;Q8VHX6	Q8BTM8	Filamin-A	Flna	1646	Color2 [A=255, R=140, G=140, B=255]	9	4					23	23	21	13	13	12.3	281.22	0	57.327	821790000	101	25.2945	25.0331	24.9224	25.0471	25.0943	24.6301	24.5326	24.5	25.149	25.5877	25.6018	25.7159	25.5563	25.4575
+	3.62524	1.08296	Q8BV49;Q504N7	Q8BV49;Q504N7	Pyrin and HIN domain-containing protein 1;Pyrin and HIN domain-containing protein 1-like	Pyhin1	1659	Color2 [A=255, R=140, G=140, B=255]	9	4					15	15	14	46	46	42.6	46.886	0	134.37	2087300000	118	26.4893	26.496	25.216	25.847	25.9376	25.7345	25.7778	26.4731	26.8334	26.5962	26.8297	27.0022	27.3554	26.867
+	3.12625	1.98916	Q8BYW1	Q8BYW1	Rho GTPase-activating protein 25	Arhgap25	1682	Color2 [A=255, R=140, G=140, B=255]	9	4					9	9	9	14.8	14.8	14.8	73.382	0	7.1887	64400000	24	19.4617	20.9906	19.3598	19.2915	20.3066	20.9816	20.7494	20.4735	21.3843	22.3588	22.8889	22.924	21.2171	22.3243
+	2.51618	2.67315	Q8C0T5	Q8C0T5	Signal-induced proliferation-associated 1-like protein 1	Sipa1l1	1695	Color2 [A=255, R=140, G=140, B=255]	9	4					32	32	31	25.6	25.6	25	197.03	0	126.48	648290000	63	24.3783	24.3111	23.8192	22.6482	22.0439	22.5393	20.9911	23.3826	24.6961	26.6583	26.8643	25.6333	23.872	23.7391
+	2.76765	0.654758	Q8CHY6	Q8CHY6	Transcriptional repressor p66 alpha	Gatad2a	1777	Color2 [A=255, R=140, G=140, B=255]	9	4					20	20	20	40.5	40.5	40.5	67.333	0	73.053	1097100000	143	25.5899	25.4431	24.9125	25.0441	25.2273	25.8274	25.1331	25.2948	25.5123	26.0081	26.0903	25.8399	25.9445	25.9727
+	3.76311	1.17959	Q8K2F0;Q91Y44	Q8K2F0	Bromodomain-containing protein 3	Brd3	1821	Color2 [A=255, R=140, G=140, B=255]	9	4					21	21	16	37.5	37.5	30.7	79.761	0	66.024	1308300000	158	25.8148	25.7578	24.5453	24.9705	25.0187	25.3213	25.191	25.448	25.6847	25.9124	26.5962	26.6334	26.335	26.4107
+	3.34229	1.55815	Q8R0S1	Q8R0S1	Cyclic AMP-dependent transcription factor ATF-7	Atf7	1879	Color2 [A=255, R=140, G=140, B=255]	9	4					7	7	6	24.2	24.2	21.5	44.607	0	27.923	189480000	23	23.224	23.2347	NaN	21.4557	22.4904	22.673	21.6496	22.2537	23.5242	24.1893	24.1366	23.3022	23.7055	23.1178
+	2.82643	0.650679	Q8VHR5	Q8VHR5	Transcriptional repressor p66-beta	Gatad2b	1959	Color2 [A=255, R=140, G=140, B=255]	9	4					14	14	14	31.5	31.5	31.5	65.41	0	90.201	953340000	122	25.3701	25.3202	25.0256	24.7575	24.9485	25.5992	24.9187	25.0135	25.3274	25.7328	25.9661	25.5496	25.7258	25.8653
+	4.04393	1.23434	Q91VW3	Q91VW3	SH3 domain-binding glutamic acid-rich-like protein 3	Sh3bgrl3	1985	Color2 [A=255, R=140, G=140, B=255]	9	4					3	3	3	26.9	26.9	26.9	10.477	0	3.6279	211620000	22	23.1082	23.2406	22.3051	22.2949	22.773	22.8251	22.7836	22.1971	23.1241	23.728	23.8105	23.6981	24.2979	23.9261
+	2.90141	0.661143	Q91WQ3	Q91WQ3	Tyrosine--tRNA ligase, cytoplasmic;Tyrosine--tRNA ligase, cytoplasmic, N-terminally processed	Yars	2004	Color2 [A=255, R=140, G=140, B=255]	9	4					24	24	24	44.5	44.5	44.5	59.105	0	42.778	1251500000	194	25.8957	25.7276	25.6799	25.1472	25.5853	25.6148	25.3612	25.4816	25.9262	25.9157	26.0279	25.9041	26.5172	26.5457
+	2.63686	0.874435	Q91YQ5	Q91YQ5	Dolichyl-diphosphooligosaccharide--protein glycosyltransferase subunit 1	Rpn1	2022	Color2 [A=255, R=140, G=140, B=255]	9	4					14	14	14	28	28	28	68.527	0	36.035	431580000	67	24.0669	24.3076	23.4154	23.8867	23.5458	23.8157	24.204	23.6861	24.2386	24.2758	24.3678	24.5186	25.2086	25.191
+	2.91806	1.1148	Q922R8	Q922R8	Protein disulfide-isomerase A6	Pdia6	2067	Color2 [A=255, R=140, G=140, B=255]	9	4					10	10	10	32.7	32.7	32.7	48.1	0	48.161	561760000	53	24.4084	25.0337	24.5038	23.845	23.466	23.9845	24.4077	23.7754	25.1795	24.541	24.8993	24.7712	25.7832	25.4969
+	2.85495	0.872723	Q99JF8	Q99JF8	PC4 and SFRS1-interacting protein	Psip1	2097	Color2 [A=255, R=140, G=140, B=255]	9	4					27	26	26	58	56.4	56.4	59.696	0	323.31	10237000000	341	28.69	28.7208	27.8589	27.7717	28.1832	28.5284	28.29	28.8181	28.8247	28.8159	28.9785	29.2117	29.5004	29.3555
+	3.179	0.742772	Q99KV1	Q99KV1	DnaJ homolog subfamily B member 11	Dnajb11	2126	Color2 [A=255, R=140, G=140, B=255]	9	4					4	4	4	15.9	15.9	15.9	40.555	0	7.971	247440000	30	23.4858	23.5946	23.2842	23.1518	22.4493	22.9529	23.1507	23.2778	23.7476	23.6714	23.5301	23.721	23.9852	24.0682
+	2.25929	0.805082	Q99PT1	Q99PT1	Rho GDP-dissociation inhibitor 1	Arhgdia	2178	Color2 [A=255, R=140, G=140, B=255]	9	4					8	8	8	58.8	58.8	58.8	23.407	0	84.627	973800000	68	25.4099	25.4564	25.102	24.7949	24.8417	25.3215	25.4028	24.6996	25.3632	25.2554	25.8118	25.8589	26.4988	26.2048
+	1.84133	1.20054	Q9CXE7	Q9CXE7	Transmembrane emp24 domain-containing protein 5	Tmed5	2309	Color2 [A=255, R=140, G=140, B=255]	9	4					1	1	1	5.2	5.2	5.2	26.172	0	5.6253	37169000	7	21.2085	21.0713	NaN	20.6159	NaN	20.3748	20.4172	20.4673	NaN	21.1295	21.0349	NaN	22.4506	22.0624
+	1.86982	1.43361	Q9D154;Q8VHP7;Q9JK88	Q9D154	Leukocyte elastase inhibitor A	Serpinb1a	2399	Color2 [A=255, R=140, G=140, B=255]	9	4					12	12	12	40.6	40.6	40.6	42.574	0	58.726	529100000	67	24.6947	24.5289	23.3149	23.3998	22.5797	23.5558	23.9956	24.5263	24.5769	23.807	24.5722	24.6802	26.3826	25.9549
+	1.9776	1.20203	Q9D172	Q9D172	ES1 protein homolog, mitochondrial	D10Jhu81e	2400	Color2 [A=255, R=140, G=140, B=255]	9	4					2	2	2	7.5	7.5	7.5	28.09	0	2.4867	68124000	6	21.9021	21.1196	21.3643	20.7335	21.0577	19.3176	21.2684	21.1816	22.3353	22.1656	21.2255	21.7496	22.7952	21.864
+	2.19963	2.08642	Q9ES52;Q6P549	Q9ES52	Phosphatidylinositol 3,4,5-trisphosphate 5-phosphatase 1	Inpp5d	2585	Color2 [A=255, R=140, G=140, B=255]	9	4					12	12	12	11.6	11.6	11.6	133.54	0	19.382	181780000	37	22.473	22.768	19.4947	22.36	21.6891	20.7418	22.3256	21.5241	24.0042	24.2883	24.1707	23.7069	22.7816	21.7021
+	2.77742	1.06952	Q9ESP1	Q9ESP1	Stromal cell-derived factor 2-like protein 1	Sdf2l1	2588	Color2 [A=255, R=140, G=140, B=255]	9	4					5	5	5	19	19	19	23.648	0	8.1784	140350000	27	22.5718	22.6731	21.739	22.0131	21.1077	22.5821	22.6533	22.053	22.736	22.9288	23.1083	23.1601	23.3671	23.2651
+	2.53132	1.3105	Q9JL35	Q9JL35	High mobility group nucleosome-binding domain-containing protein 5	Hmgn5	2652	Color2 [A=255, R=140, G=140, B=255]	9	4					7	7	7	27.6	27.6	27.6	45.343	0	10.566	135070000	27	22.8041	22.4741	21.5694	21.822	21.4694	21.7814	22.2873	21.2386	22.146	22.4225	23.2409	23.0251	24.2669	22.9297
+	2.47353	0.915631	Q9JMH6	Q9JMH6	Thioredoxin reductase 1, cytoplasmic	Txnrd1	2663	Color2 [A=255, R=140, G=140, B=255]	9	4					4	4	4	7.8	7.8	7.8	67.083	0	7.8342	82164000	22	21.8986	21.7536	20.9884	21.4761	21.1055	21.6963	21.5636	21.1072	21.528	21.8354	22.3239	22.1638	22.7323	22.8476
+	2.65005	0.68545	Q9WTQ5	Q9WTQ5	A-kinase anchor protein 12	Akap12	2746	Color2 [A=255, R=140, G=140, B=255]	9	4					29	29	29	29.2	29.2	29.2	180.69	0	95.749	679110000	129	24.8457	24.7489	24.8144	24.7701	24.5763	24.9277	24.4336	23.8949	25.024	25.1091	25.251	25.2547	25.4347	25.4561
+	2.53499	0.827403	Q9WVA4;Q9R1Q8	Q9WVA4	Transgelin-2	Tagln2	2775	Color2 [A=255, R=140, G=140, B=255]	9	4					11	11	11	65.8	65.8	65.8	22.395	0	82.145	1516100000	118	26.0812	26.0932	25.7288	25.2529	25.6135	25.8613	25.7872	25.4544	26.1382	25.7983	26.4234	26.361	27.0447	26.897
+	2.80278	0.71599	Q9Z2E1	Q9Z2E1	Methyl-CpG-binding domain protein 2	Mbd2	2826	Color2 [A=255, R=140, G=140, B=255]	9	4					10	9	9	31.9	30.2	30.2	43.5	0	72.759	402670000	41	24.3052	23.9783	23.9115	23.3346	23.6735	24.3323	23.5617	23.7257	24.6813	24.4851	24.6986	24.0823	24.3906	24.4973

## Sheet: Up in Female Chr 19
Significant	#NAME?	Difference	Protein IDs	Majority protein IDs	Protein names	Gene names	id	Symbol color	Symbol type	Symbol size	Show label	Only identified by site	Reverse	Potential contaminant	Peptides	Razor + unique peptides	Unique peptides	Sequence coverage [%]	Unique + razor sequence coverage [%]	Unique sequence coverage [%]	Mol. weight [kDa]	Q-value	Score	Intensity	MS/MS count	LFQ intensity SC19_F1	LFQ intensity SC19_F2	LFQ intensity SC19_F3	LFQ intensity SC19_F4	LFQ intensity SC19_F5	LFQ intensity SC19_F6	LFQ intensity SC19_M1	LFQ intensity SC19_M2	LFQ intensity SC19_M3	LFQ intensity SC19_M4	LFQ intensity SC19_M5	LFQ intensity SC19_M6	LFQ intensity SC19_MF_pool_01	LFQ intensity SC19_MF_pool_02
+	2.02423	-1.15132	O08586	O08586	Phosphatidylinositol 3,4,5-trisphosphate 3-phosphatase and dual-specificity protein phosphatase PTEN	Pten	148	Color2 [A=255, R=255, G=140, B=140]	9	4					3	3	3	8.7	8.7	8.7	47.152	0	4.5422	76726000	6	23.9885	NaN	NaN	22.3766	23.4069	23.577	22.4676	NaN	22.1103	22.3265	21.8251	22.2003	NaN	22.7548
+	2.73237	-0.723984	O08740	O08740	DNA-directed RNA polymerase II subunit RPB11	Polr2j	150	Color2 [A=255, R=255, G=140, B=140]	9	4					3	3	3	23.9	23.9	23.9	13.251	0	7.9704	134350000	29	23.7487	23.8179	23.2373	23.3855	23.6898	23.461	22.7811	23.3776	22.2983	23.0147	22.803	22.7216	22.9796	23.2045
+	2.5763	-0.686974	O35593	O35593	26S proteasome non-ATPase regulatory subunit 14	Psmd14	193	Color2 [A=255, R=255, G=140, B=140]	9	4					9	9	9	45.5	45.5	45.5	34.577	0	63.564	655730000	53	26.0679	26.1199	25.6396	25.3112	25.8357	26.1314	25.0488	25.1485	24.6967	25.3239	25.4593	25.3067	25.4527	25.5163
+	1.6668	-1.09946	O70492;O70493	O70492	Sorting nexin-3	Snx3	254	Color2 [A=255, R=255, G=140, B=140]	9	4					4	4	4	21.6	21.6	21.6	18.757	0	10.111	356860000	27	25.8505	25.8675	23.8948	24.0843	25.2093	24.8532	24.1576	24.4696	23.272	23.4092	23.5467	24.3077	24.2431	24.7504
+	1.98213	-1.06014	O88291	O88291	DBIRD complex subunit ZNF326	Znf326	261	Color2 [A=255, R=255, G=140, B=140]	9	4					6	6	6	16	16	16	65.225	0	18.047	222830000	21	25.059	24.4936	23.2186	23.7655	24.724	24.1648	23.5602	23.4881	23.3003	23.2271	22.2298	23.2591	24.1717	24.0817
+	2.27213	-0.673464	O88532	O88532	Zinc finger RNA-binding protein	Zfr	275	Color2 [A=255, R=255, G=140, B=140]	9	4					4	4	4	4.8	4.8	4.8	116.86	0	6.978	51756000	6	22.4509	22.6841	22.2659	21.9704	22.7269	21.8668	21.3335	21.6718	NaN	21.559	21.8388	21.867	21.8586	NaN
+	2.21769	-1.14167	O88967	O88967	ATP-dependent zinc metalloprotease YME1L1	Yme1l1	290	Color2 [A=255, R=255, G=140, B=140]	9	4					7	7	7	14.5	14.5	14.5	80.027	0	18.039	88444000	11	23.6135	23.5295	22.2698	22.6496	23.6753	22.947	22.2486	21.8066	21.8019	NaN	NaN	22.0326	22.6069	22.5264
+	2.41728	-0.553336	P05213;Q3UX10	P05213	Tubulin alpha-1B chain	Tuba1b	319	Color2 [A=255, R=255, G=140, B=140]	9	4					25	25	0	66.1	66.1	0	50.151	0	323.31	61548000000	496	32.6448	32.3522	32.0377	31.9163	32.5126	32.3151	32.1485	31.8985	31.5572	31.6543	31.5819	31.6183	32.1101	31.9571
+	1.6526	-1.36772	P06876	P06876	Transcriptional activator Myb	Myb	325	Color2 [A=255, R=255, G=140, B=140]	9	4					3	3	3	4.7	4.7	4.7	71.421	0	4.2707	21107000	6	22.2771	21.7874	20.4328	20.9052	21.6372	20.7412	20.4806	NaN	19.8577	19.4489	NaN	NaN	20.2361	NaN
+	1.77053	-0.901414	P07742	P07742	Ribonucleoside-diphosphate reductase large subunit	Rrm1	329	Color2 [A=255, R=255, G=140, B=140]	9	4					14	14	14	24.7	24.7	24.7	90.209	0	64.898	635890000	70	26.1839	24.8766	25.78	25.2668	26.3204	26.1927	25.6059	24.2992	24.7844	24.9475	24.3506	25.2243	25.611	25.3999
+	2.22497	-0.702572	P08775	P08775	DNA-directed RNA polymerase II subunit RPB1	Polr2a	338	Color2 [A=255, R=255, G=140, B=140]	9	4					4	4	4	2.9	2.9	2.9	217.17	0	5.7756	43213000	10	22.2259	22.0846	21.8049	22.0352	22.1555	21.7079	21.3116	NaN	20.7872	21.3341	NaN	21.7662	21.7283	21.7281
+	4.906	-3.95336	P09541	P09541	Myosin light chain 4	Myl4	345	Color2 [A=255, R=255, G=140, B=140]	9	4					11	11	9	63.2	63.2	52.8	21.159	0	68.85	6341700000	111	29.5672	29.5228	29.7916	29.9873	29.7883	29.017	26.6718	26.699	26.5731	25.3404	23.9501	24.7196	28.8896	29.0478
+	3.16328	-1.34241	P10400	P10400	Retrovirus-related Pol polyprotein;Reverse transcriptase;Endonuclease	Pol	352	Color2 [A=255, R=255, G=140, B=140]	9	4					2	2	2	18.3	18.3	18.3	13.302	0	4.1479	51814000	12	21.8773	21.7067	22.5145	23.3026	22.5462	22.3404	21.3515	20.9293	21.5268	21.1698	20.5772	20.6784	21.8841	21.2059
+	2.99681	-0.631872	P11440	P11440	Cyclin-dependent kinase 1	Cdk1	365	Color2 [A=255, R=255, G=140, B=140]	9	4					11	10	10	40.1	37.4	37.4	34.106	0	96.011	861570000	81	26.4601	26.2363	25.9528	25.8835	26.3471	26.3472	25.4027	25.5219	25.1935	25.7675	25.806	25.7441	26.1067	25.7899
+	2.6393	-0.57933	P14733	P14733	Lamin-B1	Lmnb1	389	Color2 [A=255, R=255, G=140, B=140]	9	4					42	42	38	68.2	68.2	63.1	66.785	0	323.31	9665800000	409	29.8136	29.8761	29.1184	29.2891	29.7678	29.7348	29.0292	29.1684	28.7275	29.0849	29.064	29.0498	29.3636	29.4602
+	5.49396	-1.31124	P15806	P15806	Transcription factor E2-alpha	Tcf3	397	Color2 [A=255, R=255, G=140, B=140]	9	4					3	3	3	10	10	10	67.7	0	15.835	115700000	9	23.8531	23.9476	NaN	23.7112	24.1797	23.939	22.6981	22.7172	NaN	NaN	22.5058	22.5384	NaN	23.1436
+	3.68584	-0.902814	P16045	P16045	Galectin-1	Lgals1	399	Color2 [A=255, R=255, G=140, B=140]	9	4					6	6	6	51.1	51.1	51.1	14.866	0	35.619	1041900000	49	26.3765	26.9209	26.4355	26.2642	26.6693	26.7049	25.3494	25.6559	25.2744	25.8191	25.7756	26.08	26.1092	26.2151
+	1.75429	-2.38527	P16406	P16406	Glutamyl aminopeptidase	Enpep	403	Color2 [A=255, R=255, G=140, B=140]	9	4					30	30	30	36	36	36	107.96	0	156.62	1609200000	140	27.3489	27.2886	27.1529	28.135	27.3958	26.865	26.3402	26.5474	26.4875	24.4998	21.3199	24.6797	26.7743	26.8719
+	3.05722	-0.65751	P17225	P17225	Polypyrimidine tract-binding protein 1	Ptbp1	412	Color2 [A=255, R=255, G=140, B=140]	9	4					9	8	8	29.8	27.9	27.9	56.477	0	195.56	2394500000	111	27.8602	27.4863	27.1988	27.4182	27.9429	27.6534	27.1771	26.6796	26.7247	26.9825	26.9465	27.1043	27.2426	27.1407
+	1.65711	-1.2907	P18653;Q9WUT3;Q7TPS0;Q8C0P0;Q3U214;Q9R1L5;Q60592;Q811L6	P18653	Ribosomal protein S6 kinase alpha-1	Rps6ka1	425	Color2 [A=255, R=255, G=140, B=140]	9	4					6	6	3	10.1	10.1	5.2	81.594	0	11.226	184350000	17	24.7297	23.1564	22.7942	23.6634	24.7531	24.82	23.4188	NaN	22.0314	22.2023	22.8519	22.9727	23.9614	23.8591
+	3.52492	-0.891801	P23475	P23475	X-ray repair cross-complementing protein 6	Xrcc6	450	Color2 [A=255, R=255, G=140, B=140]	9	4					4	4	4	6.1	6.1	6.1	69.483	0	5.4676	55679000	8	22.3896	22.5301	22.3759	22.4769	22.5162	22.3036	21.3658	21.3489	22.2099	21.4143	NaN	21.3621	21.7393	21.9749
+	1.96366	-1.27449	P23950	P23950	Zinc finger protein 36, C3H1 type-like 1	Zfp36l1	455	Color2 [A=255, R=255, G=140, B=140]	9	4					3	3	3	8.6	8.6	8.6	36.384	0	5.5569	56474000	5	23.3152	23.6196	22.0196	NaN	22.7039	22.1288	21.51	21.7249	21.4997	NaN	NaN	21.1971	21.8343	21.6307
+	1.67376	-1.19144	P24788	P24788	Cyclin-dependent kinase 11B	Cdk11b	463	Color2 [A=255, R=255, G=140, B=140]	9	4					9	9	9	12.9	12.9	12.9	91.512	0	16.338	186650000	28	24.8	24.6124	22.9557	23.1507	24.5912	23.8753	23.5907	23.6109	22.5058	23.0164	22.0367	22.0762	23.6077	23.7905
+	2.73666	-0.845222	P25206	P25206	DNA replication licensing factor MCM3	Mcm3	464	Color2 [A=255, R=255, G=140, B=140]	9	4					37	37	37	57.3	57.3	57.3	91.545	0	323.31	5384900000	347	29.1499	28.9965	28.2956	28.2769	29.1575	29.1179	28.2645	28.1765	27.5759	27.969	27.8653	28.072	28.5178	28.5188
+	2.64443	-0.623228	P31362;Q00196;P25425	P31362;Q00196;P25425	POU domain, class 2, transcription factor 3;POU domain, class 2, transcription factor 2;POU domain, class 2, transcription factor 1	Pou2f3;Pou2f2;Pou2f1	465	Color2 [A=255, R=255, G=140, B=140]	9	4					1	1	1	3.2	3.2	3.2	47.07	0.0056022	1.9394	32658000	4	21.7582	21.6587	21.5235	NaN	21.7666	21.909	20.9977	21.3367	NaN	21.2382	21.2764	20.6509	21.6954	21.4833
+	2.15754	-0.742489	P26369	P26369	Splicing factor U2AF 65 kDa subunit	U2af2	477	Color2 [A=255, R=255, G=140, B=140]	9	4					8	8	8	24.6	24.6	24.6	53.516	0	50.975	915560000	66	26.5158	26.4289	26.5886	25.7688	26.4425	26.2299	26.1629	26.0926	25.4583	25.5051	25.1082	25.1924	26.1377	26.0826
+	1.86996	-1.14724	P27870;Q9R0C8	P27870	Proto-oncogene vav	Vav1	490	Color2 [A=255, R=255, G=140, B=140]	9	4					12	12	12	15	15	15	98.136	0	33.338	508220000	61	26.1667	24.4413	24.8925	25.1509	26.0475	26.0586	25.1316	23.3352	24.1509	24.611	24.2662	24.3791	25.0893	25.2768
+	3.30059	-1.37559	P28658	P28658	Ataxin-10	Atxn10	499	Color2 [A=255, R=255, G=140, B=140]	9	4					9	9	9	22.5	22.5	22.5	53.706	0	39.893	294610000	49	25.2674	24.9003	24.1849	24.6574	25.0009	25.0523	23.8556	23.6187	22.5948	23.6368	23.0371	24.0665	24.2861	24.2942
+	1.9928	-1.58624	P28667	P28667	MARCKS-related protein	Marcksl1	501	Color2 [A=255, R=255, G=140, B=140]	9	4					2	2	2	14	14	14	20.165	0	5.6656	75348000	15	22.586	23.5301	23.1506	22.6491	23.3376	23.5641	NaN	NaN	NaN	20.9413	NaN	22.1587	22.4405	22.99
+	2.23958	-1.33391	P28843	P28843	Dipeptidyl peptidase 4;Dipeptidyl peptidase 4 membrane form;Dipeptidyl peptidase 4 soluble form	Dpp4	504	Color2 [A=255, R=255, G=140, B=140]	9	4					15	15	15	25.3	25.3	25.3	87.436	0	80.658	1208100000	53	26.9633	26.6682	26.2032	27.1539	27.46	26.6305	25.9686	26.0049	26.0192	25.6998	23.8856	25.4976	26.4565	26.6992
+	2.20473	-0.826343	P28867	P28867	Protein kinase C delta type;Protein kinase C delta type regulatory subunit;Protein kinase C delta type catalytic subunit	Prkcd	505	Color2 [A=255, R=255, G=140, B=140]	9	4					3	3	3	5.3	5.3	5.3	77.546	0	6.3715	71561000	12	23.2092	22.0782	22.3202	22.1126	22.9979	22.725	21.9796	21.4174	21.2094	21.9041	22.0149	21.9597	22.455	22.0672
+	3.03016	-0.419351	P35550	P35550	rRNA 2-O-methyltransferase fibrillarin	Fbl	538	Color2 [A=255, R=255, G=140, B=140]	9	4					14	14	10	56	56	44.6	34.306	0	114.18	1907300000	103	27.4403	27.2556	27.302	27.3513	27.3886	27.0437	26.8704	26.8735	27.1118	27.0241	26.6514	26.7341	26.9529	27.1262
+	1.63507	-1.09442	P35761	P35761	Dual specificity protein kinase TTK	Ttk	543	Color2 [A=255, R=255, G=140, B=140]	9	4					4	4	4	5.1	5.1	5.1	96.21	0	4.6546	26999000	3	21.7587	NaN	NaN	NaN	22.5798	21.5929	20.8536	NaN	NaN	20.8758	20.9187	NaN	20.9347	NaN
+	4.0623	-2.22556	P35991;Q60629;Q03145;P29319;Q8CBF3;P54763;P54761;P54754;Q61772;O09127;Q62413	P35991	Tyrosine-protein kinase BTK	Btk	547	Color2 [A=255, R=255, G=140, B=140]	9	4					12	12	12	22.3	22.3	22.3	76.437	0	24.79	355790000	34	25.2271	24.3621	24.6668	25.1877	26.0458	25.7658	23.7958	22.7671	23.579	22.9128	22.3859	22.4614	25.0637	24.8235
+	3.3718	-1.45091	P37913	P37913	DNA ligase 1	Lig1	550	Color2 [A=255, R=255, G=140, B=140]	9	4					26	26	26	38.3	38.3	38.3	102.29	0	186.49	1289900000	135	27.3268	26.6414	26.1607	26.6542	27.6087	27.2948	26.2964	25.2867	25.2105	25.2793	25.2894	25.6189	26.3656	26.4353
+	4.01072	-1.0459	P42209	P42209	Septin-1	2001-09-01	562	Color2 [A=255, R=255, G=140, B=140]	9	4					10	10	10	37.7	37.7	37.7	42.019	0	63.921	1035400000	36	27.12	26.9281	26.1952	26.1394	26.5669	26.5716	25.7063	25.5793	25.2959	25.5272	25.5645	25.5725	26.1614	26.1956
+	1.89763	-1.44478	P43247	P43247	DNA mismatch repair protein Msh2	Msh2	567	Color2 [A=255, R=255, G=140, B=140]	9	4					20	20	20	27.5	27.5	27.5	104.15	0	86.243	537490000	80	26.3489	24.7948	24.8158	24.8001	26.3184	26.0917	25.136	22.9281	24.5167	24.2853	23.1798	24.4551	25.3438	25.1047
+	3.69817	-1.13611	P47955	P47955	60S acidic ribosomal protein P1	Rplp1	595	Color2 [A=255, R=255, G=140, B=140]	9	4					3	3	3	66.7	66.7	66.7	11.475	0	101.73	4043800000	38	28.6037	29.0285	28.9548	28.7216	28.4371	28.0118	27.5155	28.0014	27.3928	27.0741	27.309	27.6479	28.2008	28.0711
+	2.86191	-0.509543	P49312	P49312	Heterogeneous nuclear ribonucleoprotein A1;Heterogeneous nuclear ribonucleoprotein A1, N-terminally processed	Hnrnpa1	608	Color2 [A=255, R=255, G=140, B=140]	9	4					18	17	15	52.5	52.5	50.3	34.196	0	131.43	9347600000	253	29.3926	29.5768	29.8244	29.5912	29.7117	29.2697	28.8975	29.0958	29.3674	29.1434	28.8001	29.0047	29.4423	29.3414
+	2.58015	-0.928587	P49717;Q9CWV1	P49717	DNA replication licensing factor MCM4	Mcm4	611	Color2 [A=255, R=255, G=140, B=140]	9	4					28	28	28	42.7	42.7	42.7	96.735	0	145.26	2680000000	208	28.1771	28.0522	27.1189	27.2118	28.0289	27.9967	27.2194	26.851	26.2523	26.9044	26.7516	27.0354	27.4262	27.3829
+	2.00981	-0.970816	P49718	P49718	DNA replication licensing factor MCM5	Mcm5	612	Color2 [A=255, R=255, G=140, B=140]	9	4					21	21	21	36.2	36.2	36.2	82.342	0	83.367	2284000000	118	28.0356	26.9252	27.016	27.0925	28.2341	28.0444	27.3626	26.227	26.2857	26.8338	26.3321	26.4818	27.3916	27.2745
+	2.87898	-1.19346	P51807	P51807	Dynein light chain Tctex-type 1	Dynlt1	626	Color2 [A=255, R=255, G=140, B=140]	9	4					3	3	3	38.9	38.9	38.9	12.483	0	8.6984	72794000	13	23.3042	22.9505	NaN	23.2849	23.359	22.639	21.9894	NaN	NaN	21.3505	22.0724	22.244	22.6823	21.5542
+	4.22305	-2.00105	P56395	P56395	Cytochrome b5	Cyb5a	673	Color2 [A=255, R=255, G=140, B=140]	9	4					7	7	7	49.3	49.3	49.3	15.241	0	43.304	430270000	49	26.0042	26.2643	24.7325	25.2095	25.4641	25.1902	23.7046	23.615	22.6883	23.591	23.1889	24.0705	24.904	24.7626
+	2.31872	-0.539213	P60335	P60335	Poly(rC)-binding protein 1	Pcbp1	703	Color2 [A=255, R=255, G=140, B=140]	9	4					15	15	10	66.9	66.9	52.8	37.497	0	202.8	4868200000	168	28.741	28.8115	28.3272	28.2359	28.7932	29.0804	28.1662	28.3097	27.7941	28.1331	28.121	28.2299	28.3069	28.4292
+	2.22088	-0.75668	P62301	P62301	40S ribosomal protein S13	Rps13	748	Color2 [A=255, R=255, G=140, B=140]	9	4					3	3	3	22.5	22.5	22.5	17.222	0	23.992	4451500000	45	28.8451	28.7797	29.053	28.5787	28.5363	28.2126	28.0976	28.4592	28.0651	28.1159	27.3405	27.3871	28.2427	28.0817
+	2.24544	-0.664033	P62331	P62331	ADP-ribosylation factor 6	Arf6	756	Color2 [A=255, R=255, G=140, B=140]	9	4					4	4	4	28.6	28.6	28.6	20.082	0	8.8823	295630000	25	25.0368	24.4701	24.3293	24.6114	24.7717	24.7692	24.4276	24.3043	24.2225	23.8478	23.3814	23.8207	24.2743	24.0768
+	2.49725	-0.690309	P62334	P62334	26S protease regulatory subunit 10B	Psmc6	757	Color2 [A=255, R=255, G=140, B=140]	9	4					16	16	16	52.2	52.2	52.2	44.172	0	110.48	1817300000	139	27.4536	27.6646	26.9282	26.9083	27.4172	27.416	26.723	26.6449	26.0334	26.5716	26.7028	26.9703	27.0299	26.8644
+	2.85269	-0.444156	P62876	P62876	DNA-directed RNA polymerases I, II, and III subunit RPABC5	Polr2l	780	Color2 [A=255, R=255, G=140, B=140]	9	4					2	2	2	29.9	29.9	29.9	7.645	0	6.4265	129700000	17	23.5228	23.3111	23.5922	23.3476	23.8259	23.7691	23.2328	22.9038	23.0844	23.2498	23.1824	23.0504	NaN	23.2578
+	2.21745	-0.897055	P62960;Q9Z2C8	P62960	Nuclease-sensitive element-binding protein 1	Ybx1	788	Color2 [A=255, R=255, G=140, B=140]	9	4					11	11	8	42.9	42.9	31.7	35.73	0	323.31	2397600000	105	27.5291	27.7169	28.3899	28.2695	27.6849	27.0047	26.3612	27.0558	27.1402	27.2011	26.4068	27.0476	27.4503	27.5125
+	2.40868	-0.570307	P68372;Q9D6F9;A2AQ07	P68372;Q9D6F9	Tubulin beta-4B chain;Tubulin beta-4A chain	Tubb4b;Tubb4a	827	Color2 [A=255, R=255, G=140, B=140]	9	4					23	23	4	75.5	75.5	16	49.83	0	323.31	64245000000	784	32.4418	32.351	31.7778	31.7246	32.3541	32.1623	31.7719	31.8687	31.4465	31.5162	31.4422	31.3442	31.8918	31.8668
+	3.56062	-1.22238	P70202	P70202	Latexin	Lxn	834	Color2 [A=255, R=255, G=140, B=140]	9	4					4	4	4	26.6	26.6	26.6	25.492	0	18.312	555110000	36	26.2343	26.3454	25.0733	25.4729	25.6615	25.5634	24.5064	24.9261	24.3793	24.1858	24.6565	24.3623	25.5122	25.2651
+	2.3221	-1.13737	P70333	P70333	Heterogeneous nuclear ribonucleoprotein H2	Hnrnph2	842	Color2 [A=255, R=255, G=140, B=140]	9	4					11	6	6	37.9	21.2	21.2	49.279	0	119.72	419750000	46	25.278	25.1545	24.4642	24.8129	25.2523	25.4879	24.4679	24.7023	22.8908	24.2599	23.8213	23.4833	25.03	24.6691
+	3.88837	-0.637538	P70372	P70372	ELAV-like protein 1	Elavl1	846	Color2 [A=255, R=255, G=140, B=140]	9	4					13	13	13	52.8	52.8	52.8	36.169	0	135.6	2293400000	104	27.7607	27.6574	27.8504	27.321	27.5728	27.485	26.9413	27.1794	27.055	27.1011	26.7146	26.8306	27.3031	27.2089
+	2.49676	-0.771751	P70388	P70388	DNA repair protein RAD50	Rad50	847	Color2 [A=255, R=255, G=140, B=140]	9	4					18	18	18	15.2	15.2	15.2	153.49	0	48.594	479870000	98	25.6634	25.336	25.0175	24.7554	25.7438	25.7916	25.0524	24.5426	24.3502	24.4628	24.691	24.5781	24.9975	25.0875
+	1.85251	-0.82499	P70671	P70671	Interferon regulatory factor 3	Irf3	856	Color2 [A=255, R=255, G=140, B=140]	9	4					4	4	4	12.6	12.6	12.6	46.852	0	12.574	116360000	21	23.0296	23.1642	22.658	23.2768	23.7482	24.0256	22.6161	22.3102	21.8077	23.1849	22.3083	22.7251	22.806	22.6154
+	2.73951	-0.862869	P70677	P70677	Caspase-3;Caspase-3 subunit p17;Caspase-3 subunit p12	Casp3	857	Color2 [A=255, R=255, G=140, B=140]	9	4					4	4	4	20.9	20.9	20.9	31.474	0	18.337	250500000	19	24.1977	24.6785	24.3035	24.5427	24.7506	24.5634	23.8293	23.3917	22.8338	23.8434	23.8974	24.0637	24.1897	24.0138
+	2.17044	-0.669669	P97310	P97310	DNA replication licensing factor MCM2	Mcm2	882	Color2 [A=255, R=255, G=140, B=140]	9	4					27	27	27	38.7	38.7	38.7	102.08	0	106.53	1637100000	195	27.278	27.2748	26.5777	26.6218	27.3947	27.4762	26.7363	26.5389	26.0508	26.5387	26.1439	26.5966	26.7336	26.669
+	2.08169	-0.76502	P97311	P97311	DNA replication licensing factor MCM6	Mcm6	883	Color2 [A=255, R=255, G=140, B=140]	9	4					33	33	33	44.3	44.3	44.3	92.866	0	192.45	2451400000	200	27.9993	27.8841	27.0569	27.0502	28.0692	28.0712	27.1191	26.9475	26.3899	26.9707	26.9195	27.1942	27.3818	27.4891
+	2.15583	-1.04419	P97377;Q80YP0	P97377	Cyclin-dependent kinase 2	Cdk2	893	Color2 [A=255, R=255, G=140, B=140]	9	4					7	6	6	24.6	22.3	22.3	38.978	0	8.701	97205000	19	23.4239	23.1306	22.3717	22.3328	23.6178	23.789	22.1668	21.835	21.4273	22.5466	21.9401	22.4848	22.5048	23.0037
+	2.38964	-1.04558	P97760	P97760	DNA-directed RNA polymerase II subunit RPB3	Polr2c	908	Color2 [A=255, R=255, G=140, B=140]	9	4					6	6	6	33.8	33.8	33.8	31.443	0	17.085	259770000	26	24.6771	24.7117	24.3199	24.505	24.6866	24.8967	23.6898	24.1116	23.3861	22.3562	24.1107	23.8691	24.2421	24.1102
+	3.15593	-1.06541	P97930	P97930	Thymidylate kinase	Dtymk	917	Color2 [A=255, R=255, G=140, B=140]	9	4					6	6	6	30.2	30.2	30.2	23.914	0	8.2473	255980000	33	24.7715	24.6325	23.9384	24.0751	25.0603	24.6832	23.413	23.0709	23.1872	23.5057	23.5991	23.9927	24.0741	24.0907
+	2.84196	-0.626658	P99024	P99024	Tubulin beta-5 chain	Tubb5	918	Color2 [A=255, R=255, G=140, B=140]	9	4					22	4	4	71.8	16	16	49.67	0	304.07	28516000000	122	31.5532	31.3813	30.7517	30.9368	31.3967	31.3643	30.847	30.7471	30.6066	30.4367	30.5258	30.4609	31.0616	30.9952
+	2.93665	-0.820691	P99027	P99027	60S acidic ribosomal protein P2	Rplp2	920	Color2 [A=255, R=255, G=140, B=140]	9	4					7	7	7	91.3	91.3	91.3	11.651	0	200.71	13307000000	135	30.415	30.5839	30.3949	30.1749	30.2468	29.5275	29.2834	29.7822	29.237	29.2036	29.2477	29.6648	29.9606	29.8829
+	2.00569	-0.726359	Q08639	Q08639	Transcription factor Dp-1	Tfdp1	962	Color2 [A=255, R=255, G=140, B=140]	9	4					2	2	2	7.3	7.3	7.3	45.23	0	3.7212	35706000	3	22.0739	22.015	20.9467	21.1913	22.0017	21.3962	20.8353	20.9232	20.3572	20.9816	21.0431	21.1263	21.2589	21.4627
+	2.24347	-0.593388	Q3TWW8	Q3TWW8	Serine/arginine-rich splicing factor 6	Srsf6	1004	Color2 [A=255, R=255, G=140, B=140]	9	4					11	11	8	29.5	29.5	21.2	39.025	0	24.296	2634000000	99	28.0487	28.0415	27.5934	27.6438	27.8132	27.3198	27.3093	27.4514	27.3572	27.2435	26.72	26.8186	27.4374	27.352
+	1.9375	-0.808825	Q3U0V2	Q3U0V2	Tumor necrosis factor receptor type 1-associated DEATH domain protein	Tradd	1008	Color2 [A=255, R=255, G=140, B=140]	9	4					3	3	3	12.6	12.6	12.6	34.577	0	18.875	108410000	14	23.7328	23.7699	23.0725	22.9266	23.2974	23.0486	23.233	22.6994	22.1576	NaN	22.0093	22.3964	22.7519	23.1036
+	3.29674	-0.829606	Q4FK66	Q4FK66	Pre-mRNA-splicing factor 38A	Prpf38a	1065	Color2 [A=255, R=255, G=140, B=140]	9	4					6	6	6	18.9	18.9	18.9	37.436	0	10.262	759820000	19	26.312	25.9873	25.8054	26.6702	26.2175	26.0975	25.8248	25.2696	25.0611	25.4943	25.278	25.1845	25.9054	25.8612
+	2.12971	-0.819835	Q5DTM8	Q5DTM8	E3 ubiquitin-protein ligase BRE1A	Rnf20	1084	Color2 [A=255, R=255, G=140, B=140]	9	4					6	6	6	7.2	7.2	7.2	113.52	0	12.196	967990000	16	27.2022	26.6072	26.0007	25.8291	26.5532	26.5219	25.8954	25.7769	25.2895	25.5705	25.1865	26.0766	25.7129	26.1789
+	2.44914	-0.755318	Q60749;Q9WU01	Q60749	KH domain-containing, RNA-binding, signal transduction-associated protein 1	Khdrbs1	1118	Color2 [A=255, R=255, G=140, B=140]	9	4					6	6	6	14	14	14	48.37	0	59.327	1747100000	52	27.0943	27.0714	27.0298	26.9706	27.2395	27.2317	26.6577	25.7289	26.0152	26.9418	26.6883	26.0735	26.7712	26.8884
+	2.41802	-0.85847	Q60775	Q60775	ETS-related transcription factor Elf-1	Elf1	1119	Color2 [A=255, R=255, G=140, B=140]	9	4					5	5	5	19.6	19.6	19.6	66.22	0	26.566	161350000	17	24.0196	23.8866	23.0913	23.2154	24.2677	24.3068	22.7484	22.6516	23.1018	22.9333	23.1442	23.0573	23.4663	23.5042
+	2.82699	-2.04714	Q60848	Q60848	Lymphocyte-specific helicase	Hells	1124	Color2 [A=255, R=255, G=140, B=140]	9	4					10	10	10	16.3	16.3	16.3	95.125	0	96.787	246550000	36	25.3102	23.8133	23.4192	24.302	25.384	24.6277	23.9278	22.6628	22.0176	21.6878	21.6985	22.5791	24.2948	24.1521
+	2.89969	-0.675913	Q60875	Q60875	Rho guanine nucleotide exchange factor 2	Arhgef2	1129	Color2 [A=255, R=255, G=140, B=140]	9	4					16	16	16	21.8	21.8	21.8	111.97	0	42.78	632700000	60	25.8451	25.4195	25.5684	25.6622	26.273	25.8291	25.2436	25.031	24.6663	25.2885	25.1104	25.202	25.4357	25.4146
+	2.29472	-0.600805	Q60953	Q60953	Protein PML	Pml	1136	Color2 [A=255, R=255, G=140, B=140]	9	4					3	3	3	3.5	3.5	3.5	98.241	0.0029648	2.3863	52982000	3	22.681	21.9075	22.2776	22.0838	22.411	22.1864	21.4253	NaN	NaN	21.6419	21.6604	21.9008	21.9463	22.1096
+	4.14377	-0.886111	Q60960	Q60960	Importin subunit alpha-5;Importin subunit alpha-5, N-terminally processed	Kpna1	1137	Color2 [A=255, R=255, G=140, B=140]	9	4					3	3	1	8.9	8.9	3.5	60.182	0	14.496	279840000	14	24.7051	25.1806	24.7005	24.6056	24.8866	24.4822	24.1642	23.6769	23.704	24.0807	23.6366	23.9817	23.8307	23.8567
+	4.12621	-0.624682	Q61164	Q61164	Transcriptional repressor CTCF	Ctcf	1155	Color2 [A=255, R=255, G=140, B=140]	9	4					4	4	4	6.2	6.2	6.2	83.745	0	7.263	174850000	14	24.2115	23.9346	24.1223	23.7415	23.9819	23.7284	23.2088	23.2396	23.4668	23.5037	23.1951	23.3582	23.1855	23.8284
+	4.03851	-0.785084	Q61191	Q61191	Host cell factor 1;HCF N-terminal chain 1;HCF N-terminal chain 2;HCF N-terminal chain 3;HCF N-terminal chain 4;HCF N-terminal chain 5;HCF N-terminal chain 6;HCF C-terminal chain 1;HCF C-terminal chain 2;HCF C-terminal chain 3;HCF C-terminal chain 4;HCF C-terminal chain 5;HCF C-terminal chain 6	Hcfc1	1161	Color2 [A=255, R=255, G=140, B=140]	9	4					7	7	7	4.2	4.2	4.2	210.43	0	17.58	196890000	21	24.0626	24.4414	24.0192	23.9043	24.1187	24.0614	23.2999	22.9363	23.3602	23.1831	23.6648	23.4526	23.8763	23.8188
+	1.82524	-0.935022	Q61210	Q61210	Rho guanine nucleotide exchange factor 1	Arhgef1	1165	Color2 [A=255, R=255, G=140, B=140]	9	4					11	11	11	16.3	16.3	16.3	102.8	0	48.546	320150000	52	25.1994	25.0818	24.0725	24.2363	24.9734	24.9161	24.521	24.0981	23.2677	22.8781	23.8689	24.2356	24.8731	24.3247
+	3.05946	-0.934933	Q61216	Q61216	Double-strand break repair protein MRE11A	Mre11a	1166	Color2 [A=255, R=255, G=140, B=140]	9	4					6	6	6	9.3	9.3	9.3	80.222	0	11.826	101650000	15	22.9329	23.6083	22.8159	22.6659	23.8159	23.2628	22.3741	22.3706	22.3139	22.1839	21.9289	22.3207	22.4864	22.8291
+	2.44188	-2.06885	Q61879;Q02566;Q91Z83;P13542;Q5SX39;A2AQP0;Q5SX40	Q61879	Myosin-10	Myh10	1193	Color2 [A=255, R=255, G=140, B=140]	9	4					34	17	16	19.5	10.7	10.3	228.99	0	64.973	264990000	41	24.3547	25.182	25.5345	25.6541	24.7774	23.2772	23.2526	21.7943	23.5154	23.2911	NaN	21.7858	24.1569	24.1605
+	2.13578	-0.86262	Q61881	Q61881	DNA replication licensing factor MCM7	Mcm7	1194	Color2 [A=255, R=255, G=140, B=140]	9	4					23	23	23	41.7	41.7	41.7	81.21	0	114.18	2343100000	167	28.1457	27.2684	27.0586	27.2278	28.089	28.1924	27.2395	26.4526	26.3623	26.9669	26.7727	27.0124	27.3157	27.4028
+	1.80363	-0.890263	Q61937	Q61937	Nucleophosmin	Npm1	1195	Color2 [A=255, R=255, G=140, B=140]	9	4					13	13	13	55.5	55.5	55.5	32.56	0	287.69	12646000000	158	30.0716	30.4843	31.1001	30.5221	29.5516	29.0574	29.1901	29.3811	29.1699	29.0207	29.2586	29.4251	29.649	29.6698
+	2.96161	-0.77963	Q61990;P57722	Q61990	Poly(rC)-binding protein 2	Pcbp2	1196	Color2 [A=255, R=255, G=140, B=140]	9	4					14	9	9	59.1	45.3	45.3	38.221	0	47.314	1853300000	79	27.5322	27.5143	26.8305	26.9061	27.489	27.7352	26.6964	26.5505	26.1791	26.7297	26.5588	26.6148	27.0201	27.0605
+	2.22681	-0.84627	Q62095	Q62095	ATP-dependent RNA helicase DDX3Y	Ddx3y	1200	Color2 [A=255, R=255, G=140, B=140]	9	4					22	1	1	31.5	1.5	1.5	73.427	0.0044643	2.0391	67223000	12	23.3163	23.1579	21.9524	22.0914	22.9702	22.5458	22.1594	21.7104	21.7423	21.9133	21.6977	21.7334	NaN	22.1719
+	3.16886	-0.865058	Q62167;P16381;Q61496	Q62167;P16381	ATP-dependent RNA helicase DDX3X;Putative ATP-dependent RNA helicase Pl10	Ddx3x;D1Pas1	1203	Color2 [A=255, R=255, G=140, B=140]	9	4					28	27	7	48	48	18.3	73.101	0	256.31	2996500000	150	28.5028	28.155	27.4697	27.7236	28.2485	28.0247	27.4868	27.1778	26.7918	27.2255	27.0439	27.2083	27.6972	27.7146
+	3.72197	-0.935729	Q62318	Q62318	Transcription intermediary factor 1-beta	Trim28	1212	Color2 [A=255, R=255, G=140, B=140]	9	4					26	26	26	37.1	37.1	37.1	88.846	0	167.78	5242400000	282	29.1743	29.1848	28.5923	28.4705	28.9884	29.134	28.0563	28.1743	27.5088	27.9523	28.1127	28.1255	28.4879	28.4847
+	2.96762	-1.71614	Q62431;A6PWV5	Q62431	AT-rich interactive domain-containing protein 3A	Arid3a	1224	Color2 [A=255, R=255, G=140, B=140]	9	4					4	4	4	7	7	7	64.172	0	6.5803	43262000	9	22.4277	22.7994	22.5419	22.3554	22.4434	21.9819	NaN	NaN	NaN	20.2545	21.1631	NaN	22.0602	21.2734
+	2.03359	-0.853145	Q62448	Q62448	Eukaryotic translation initiation factor 4 gamma 2	Eif4g2	1227	Color2 [A=255, R=255, G=140, B=140]	9	4					23	23	23	28.4	28.4	28.4	102.1	0	133.51	1259600000	124	27.3611	26.9863	26.048	26.1785	27.0951	26.8976	26.3164	25.9701	25.2074	25.9356	25.8657	26.1525	26.4578	26.4437
+	2.58179	-0.742516	Q63850	Q63850	Nuclear pore glycoprotein p62	Nup62	1230	Color2 [A=255, R=255, G=140, B=140]	9	4					6	6	6	16.3	16.3	16.3	53.254	0	23.142	445100000	35	25.6192	25.6189	24.827	25.2144	25.354	25.5283	24.4131	24.3354	NaN	24.4862	24.9015	24.9526	24.954	24.8721
+	2.80699	-0.640727	Q64012	Q64012	RNA-binding protein Raly	Raly	1232	Color2 [A=255, R=255, G=140, B=140]	9	4					13	13	13	42	42	42	33.188	0	59.361	1200800000	94	27.0019	26.441	26.7045	26.5956	26.8127	26.5818	26.3565	26.1909	26.0881	26.2317	25.4947	25.9312	26.3943	26.3453
+	2.91166	-1.60733	Q64287	Q64287	Interferon regulatory factor 4	Irf4	1239	Color2 [A=255, R=255, G=140, B=140]	9	4					5	5	5	15.3	15.3	15.3	51.577	0	10.027	98402000	16	23.2099	23.8596	22.4335	22.4769	23.9967	23.8938	21.4277	21.4993	NaN	22.1558	21.8617	21.5776	22.9712	22.9234
+	1.61328	-1.46376	Q65Z40	Q65Z40	Wings apart-like protein homolog	Wapal	1255	Color2 [A=255, R=255, G=140, B=140]	9	4					7	7	7	7.3	7.3	7.3	134.07	0	13.739	78003000	10	22.8675	22.6646	21.9204	21.2621	24.5283	22.556	21.2353	22.5079	20.1534	21.3047	20.6467	21.1685	22.0524	22.1913
+	2.38922	-0.67039	Q69ZQ2	Q69ZQ2	Pre-mRNA-splicing factor ISY1 homolog	Isy1	1263	Color2 [A=255, R=255, G=140, B=140]	9	4					4	4	4	19.6	19.6	19.6	32.989	0	27.403	169220000	23	24.2741	24.2629	23.3757	23.412	23.8031	23.8595	23.207	23.3797	22.9134	23.3094	22.893	23.2624	23.4995	23.368
+	3.2307	-0.819271	Q6NZJ6	Q6NZJ6	Eukaryotic translation initiation factor 4 gamma 1	Eif4g1	1285	Color2 [A=255, R=255, G=140, B=140]	9	4					15	15	14	10.8	10.8	10.3	176.07	0	39.497	588790000	71	25.9382	25.4981	25.3874	25.3171	26.1945	25.6725	25.2918	24.7951	24.74	24.8033	24.7736	24.6885	25.3538	25.2514
+	3.2917	-1.25181	Q6P9L6	Q6P9L6	Kinesin-like protein KIF15	Kif15	1307	Color2 [A=255, R=255, G=140, B=140]	9	4					27	27	27	23.9	23.9	23.9	160.12	0	86.078	561070000	80	26.4393	25.8042	24.945	25.1902	26.0157	25.7565	24.8159	24.4551	24.2332	24.2596	24.1658	24.7104	25.1791	25.1548
+	2.43942	-1.56783	Q6P9P6	Q6P9P6	Kinesin-like protein KIF11	Kif11	1308	Color2 [A=255, R=255, G=140, B=140]	9	4					25	25	25	27.1	27.1	27.1	118.03	0	66.381	621000000	85	26.3405	25.7057	24.6088	25.0204	26.7182	26.5413	24.917	23.5767	24.0238	23.7694	24.5727	24.6683	25.3209	25.0425
+	3.61758	-1.08321	Q6PG16	Q6PG16	Holliday junction recognition protein	Hjurp	1324	Color2 [A=255, R=255, G=140, B=140]	9	4					9	9	9	18.6	18.6	18.6	74.198	0	29.272	296910000	31	25.1058	24.9365	24.6601	24.5825	24.8511	24.8709	24.2545	24.1186	23.8104	23.5526	23.0242	23.7473	24.3667	24.4253
+	1.7928	-1.09184	Q6PGG2	Q6PGG2	GEM-interacting protein	Gmip	1326	Color2 [A=255, R=255, G=140, B=140]	9	4					2	2	2	4	4	4	107.54	0	7.1217	67314000	4	22.6612	22.5938	21.9799	21.9397	23.504	23.4918	21.7406	NaN	21.3876	21.763	NaN	21.5217	21.841	22.0695
+	2.41528	-0.568874	Q6Y7W8	Q6Y7W8	PERQ amino acid-rich with GYF domain-containing protein 2	Gigyf2	1339	Color2 [A=255, R=255, G=140, B=140]	9	4					17	17	17	20.7	20.7	20.7	149.19	0	96.722	1200500000	125	26.8394	27.0839	26.5939	26.4652	26.6002	26.3768	26.4733	26.2478	26.2292	25.8874	25.9333	25.7751	26.3419	26.3006
+	1.99438	-1.4446	Q6ZQ08	Q6ZQ08	CCR4-NOT transcription complex subunit 1	Cnot1	1343	Color2 [A=255, R=255, G=140, B=140]	9	4					14	14	14	6.8	6.8	6.8	266.8	0	28.143	192650000	46	24.6915	23.6176	23.7652	23.6394	24.8644	24.4269	24.1588	21.7865	22.9645	22.8067	21.4894	23.1315	23.5995	22.9226
+	1.52459	-1.53905	Q6ZQB6;A2ARP1	Q6ZQB6	Inositol hexakisphosphate and diphosphoinositol-pentakisphosphate kinase 2	Ppip5k2	1346	Color2 [A=255, R=255, G=140, B=140]	9	4					10	10	10	11	11	11	128.43	0	15.726	101930000	18	23.9308	22.2344	22.3787	22.261	24.1327	24.291	21.9291	22.5541	20.4378	NaN	20.8951	22.5125	22.6846	22.472
+	2.79445	-0.498037	Q6ZWQ0	Q6ZWQ0	Nesprin-2	Syne2	1353	Color2 [A=255, R=255, G=140, B=140]	9	4					3	3	3	0.5	0.5	0.5	782.72	0.00045725	3.0313	1307200000	10	26.9865	27.1302	26.6584	26.5419	26.7278	26.949	26.1297	26.3032	26.3539	26.3899	26.6324	26.1966	26.4374	26.7205
+	3.52383	-0.414723	Q7TMK9	Q7TMK9	Heterogeneous nuclear ribonucleoprotein Q	Syncrip	1375	Color2 [A=255, R=255, G=140, B=140]	9	4					25	25	25	49.1	49.1	49.1	69.632	0	323.31	7517100000	249	29.2231	29.379	29.3551	29.0303	29.2863	29.32	28.6707	28.9909	28.8651	28.8606	28.7129	29.0053	29.1851	29.0964
+	1.87087	-0.920454	Q7TMY8	Q7TMY8	E3 ubiquitin-protein ligase HUWE1	Huwe1	1378	Color2 [A=255, R=255, G=140, B=140]	9	4					2	2	2	0.8	0.8	0.8	482.63	0	4.4136	26940000	8	22.2327	22.0775	NaN	NaN	21.4417	21.7359	21.2477	20.7254	NaN	NaN	NaN	20.8814	20.9436	21.414
+	2.89498	-0.624732	Q7TQK4	Q7TQK4	Exosome complex component RRP40	Exosc3	1386	Color2 [A=255, R=255, G=140, B=140]	9	4					3	3	3	23.4	23.4	23.4	29.546	0	10.932	110470000	19	23.4283	23.3768	23.1572	23.1576	22.9991	23.2909	22.453	22.9506	22.7301	22.743	22.0756	22.7092	23.2852	22.848
+	2.07957	-0.727648	Q7TSC1	Q7TSC1	Protein PRRC2A	Prrc2a	1388	Color2 [A=255, R=255, G=140, B=140]	9	4					6	5	5	3.7	3.3	3.3	229.2	0	9.4836	75206000	15	23.0439	23.1742	22.8078	22.9591	22.5511	22.2118	21.5106	22.1398	21.9637	22.2351	NaN	22.4691	22.4871	22.5537
+	1.91842	-0.915629	Q7TSZ8	Q7TSZ8	Nucleus accumbens-associated protein 1	Nacc1	1392	Color2 [A=255, R=255, G=140, B=140]	9	4					2	2	2	4.5	4.5	4.5	56.536	0	4.208	19215000	5	21.8085	20.6498	NaN	20.5568	20.9494	21.2714	20.3777	NaN	NaN	20.2002	19.9445	20.0039	20.5798	20.4897
+	2.00851	-1.70266	Q7TT37	Q7TT37	Elongator complex protein 1	Ikbkap	1394	Color2 [A=255, R=255, G=140, B=140]	9	4					8	8	8	7.5	7.5	7.5	149.58	0	20.807	145840000	25	24.4453	23.348	23.1815	22.7491	24.7681	24.4335	22.9795	21.1583	NaN	22.1305	21.2738	23.0492	22.9433	23.3604
+	2.00325	-2.27786	Q80TP3	Q80TP3	E3 ubiquitin-protein ligase UBR5	Ubr5	1401	Color2 [A=255, R=255, G=140, B=140]	9	4					6	6	6	2.3	2.3	2.3	308.35	0	7.7767	45034000	8	20.9372	22.0385	NaN	21.8784	24.3717	21.8667	19.9454	NaN	19.8504	20.0477	NaN	19.9191	21.1491	NaN
+	2.03714	-0.693447	Q80U58;Q80U78	Q80U58;Q80U78	Pumilio homolog 2;Pumilio homolog 1	Pum2;Pum1	1405	Color2 [A=255, R=255, G=140, B=140]	9	4					6	6	6	6	6	6	114.31	0	13.302	254330000	29	24.626	23.9995	23.7731	24.2579	24.6736	24.239	23.8775	22.8971	23.4772	23.8255	23.3994	23.9318	23.8205	24.084
+	2.74371	-0.723881	Q80UG5	Q80UG5	Septin-9	2009-09-01	1408	Color2 [A=255, R=255, G=140, B=140]	9	4					5	5	5	9.1	9.1	9.1	65.574	0	9.4043	153600000	39	23.6599	23.8309	23.8491	23.391	23.7796	23.854	22.7586	22.9322	22.6134	23.193	22.8504	23.6736	23.5464	23.5612
+	2.80634	-0.471892	Q80UW8	Q80UW8	DNA-directed RNA polymerases I, II, and III subunit RPABC1	Polr2e	1412	Color2 [A=255, R=255, G=140, B=140]	9	4					7	7	7	44.3	44.3	44.3	24.57	0	62.622	367030000	25	24.8415	25.0453	25.2483	24.693	24.9211	25.1191	24.4029	24.8349	24.482	24.3191	24.5554	24.4427	24.2809	24.9833
+	2.14512	-0.952008	Q80YR7	Q80YR7	Claspin	Clspn	1439	Color2 [A=255, R=255, G=140, B=140]	9	4					1	1	1	1	1	1	146.71	0.0044571	2.0304	12076000	4	21.12	20.8877	20.3816	20.2621	20.8609	NaN	19.9607	19.7902	19.5005	NaN	NaN	NaN	NaN	19.8087
+	1.95917	-0.871992	Q8BG48	Q8BG48	Serine/threonine-protein kinase 17B	Stk17b	1460	Color2 [A=255, R=255, G=140, B=140]	9	4					6	6	6	22.3	22.3	22.3	41.982	0	22.595	277750000	27	25.1796	24.8833	23.7707	24.6887	24.7763	24.4037	24.3131	24.3196	23.5885	23.7419	23.1748	23.3324	23.8116	24.0876
+	1.80221	-0.841525	Q8BHD7	Q8BHD7	Polypyrimidine tract-binding protein 3	Ptbp3	1484	Color2 [A=255, R=255, G=140, B=140]	9	4					10	10	9	28.7	28.7	26.8	56.7	0	244.47	1560600000	47	27.6143	26.7261	26.7212	26.6623	27.3031	27.2909	27.1504	25.4802	25.7802	26.5176	26.0731	26.2674	26.578	26.8875
+	2.27917	-0.938184	Q8BHJ9	Q8BHJ9	Pre-mRNA-splicing factor SLU7	Slu7	1485	Color2 [A=255, R=255, G=140, B=140]	9	4					8	8	8	16.6	16.6	16.6	68.079	0	28.808	174270000	39	24.3172	24.3602	23.4485	23.455	24.2157	23.6648	23.6898	22.6838	23.4255	22.5823	22.5326	22.9185	23.5788	23.6772
+	3.00121	-1.21155	Q8BIQ5	Q8BIQ5	Cleavage stimulation factor subunit 2	Cstf2	1491	Color2 [A=255, R=255, G=140, B=140]	9	4					8	8	4	20	20	8.1	61.341	0	43.624	278150000	32	24.9463	25.3402	23.8898	24.3733	24.7624	24.8281	23.6693	23.8401	23.3446	23.2535	22.8416	23.9218	24.3552	24.1083
+	2.06972	-1.14477	Q8BJ71	Q8BJ71	Nuclear pore complex protein Nup93	Nup93	1494	Color2 [A=255, R=255, G=140, B=140]	9	4					6	6	6	8.5	8.5	8.5	93.28	0	18.798	134550000	19	24.4268	23.8023	22.63	23.2019	24.2261	23.5666	22.9482	22.51	22.4673	22.7061	NaN	21.8561	23.3495	23.0544
+	1.99289	-1.64883	Q8BMS9	Q8BMS9	Ras association domain-containing protein 2	Rassf2	1519	Color2 [A=255, R=255, G=140, B=140]	9	4					10	10	10	37.1	37.1	37.1	37.973	0	30.389	278630000	33	25.3588	25.361	23.0601	23.6436	25.1421	25.3516	23.7243	23.877	21.8807	23.0877	22.4244	23.0302	23.9387	24.2068
+	3.32358	-0.790623	Q8C2Q3	Q8C2Q3	RNA-binding protein 14	Rbm14	1606	Color2 [A=255, R=255, G=140, B=140]	9	4					18	18	18	30.3	30.3	30.3	69.448	0	64.07	1940900000	144	27.7385	27.4216	27.4646	27.2191	27.5604	27.2528	27.1225	26.8621	26.7397	26.6082	26.2761	26.3047	27.0408	27.0633
+	1.8962	-1.00014	Q8C5L3	Q8C5L3	CCR4-NOT transcription complex subunit 2	Cnot2	1615	Color2 [A=255, R=255, G=140, B=140]	9	4					2	2	2	5.4	5.4	5.4	59.71	0	3.9788	126890000	6	24.1489	24.2559	22.826	22.6869	23.5788	23.913	22.8685	22.8097	22.2116	22.4333	NaN	22.5173	23.1029	22.6886
+	3.48441	-0.940542	Q8C7Q4	Q8C7Q4	RNA-binding protein 4	Rbm4	1620	Color2 [A=255, R=255, G=140, B=140]	9	4					9	9	2	31.6	31.6	12.2	40.045	0	102.69	258730000	37	24.8634	24.7536	24.4626	24.1791	24.5275	24.5369	23.9578	24.0868	23.6734	23.3781	23.157	23.4269	24.1752	24.4046
+	4.42094	-1.0151	Q8C854	Q8C854	Myelin expression factor 2	Myef2	1624	Color2 [A=255, R=255, G=140, B=140]	9	4					11	11	11	20.1	20.1	20.1	63.294	0	56.134	652260000	77	26.0981	26.094	26.2531	25.78	25.9085	25.682	25.0687	25.3745	25.0763	24.8101	24.5524	24.843	25.4942	25.5728
+	2.62871	-0.906787	Q8CDG3	Q8CDG3	Deubiquitinating protein VCIP135	Vcpip1	1636	Color2 [A=255, R=255, G=140, B=140]	9	4					4	4	4	4.5	4.5	4.5	134.5	0	6.1065	48346000	6	23.0007	22.1992	NaN	NaN	22.5506	22.7684	21.8734	21.6705	NaN	NaN	21.6054	21.7424	21.3283	21.6458
+	2.24331	-0.696874	Q8CGF7;Q3B807	Q8CGF7	Transcription elongation regulator 1	Tcerg1	1651	Color2 [A=255, R=255, G=140, B=140]	9	4					8	8	8	7.9	7.9	7.9	123.79	0	14.448	247960000	30	24.421	24.5875	23.957	23.9579	24.5834	24.9936	23.71	23.5728	23.2593	24.005	23.8302	23.9419	24.1301	24.0203
+	3.94362	-1.39182	Q8CII2	Q8CII2	Cell division cycle protein 123 homolog	Cdc123	1671	Color2 [A=255, R=255, G=140, B=140]	9	4					5	5	5	15.8	15.8	15.8	38.816	0	8.8352	72358000	13	23.1015	23.0927	22.0943	23.1381	22.6159	23.0666	21.703	21.952	21.1965	21.257	20.9861	21.6634	22.3907	21.9578
+	1.95639	-0.714679	Q8K0V4	Q8K0V4	CCR4-NOT transcription complex subunit 3	Cnot3	1690	Color2 [A=255, R=255, G=140, B=140]	9	4					5	5	5	6.8	6.8	6.8	81.945	0	7.7833	85341000	10	22.6434	23.3242	22.6605	21.9943	23.1494	23.1041	21.65	22.162	21.8708	22.3277	22.1871	22.3902	22.7361	22.3571
+	2.02696	-0.964317	Q8K2D3	Q8K2D3	Enhancer of mRNA-decapping protein 3	Edc3	1698	Color2 [A=255, R=255, G=140, B=140]	9	4					7	7	7	15.6	15.6	15.6	55.957	0	15.645	140000000	20	24.2826	24.2725	23.1333	23.054	23.7257	23.3111	22.9685	22.9074	22.4614	21.763	22.841	23.0518	23.3777	23.2888
+	2.88775	-0.677066	Q8K310	Q8K310	Matrin-3	Matr3	1711	Color2 [A=255, R=255, G=140, B=140]	9	4					23	23	23	37	37	37	94.629	0	209.41	2826800000	167	28.2598	27.9133	27.6089	27.5436	28.1369	27.8506	27.4596	27.4222	27.2184	27.3083	26.8178	27.0243	27.7503	27.5993
+	2.28265	-0.870688	Q8K409	Q8K409	DNA polymerase beta	Polb	1723	Color2 [A=255, R=255, G=140, B=140]	9	4					4	4	4	14.6	14.6	14.6	38.287	0	9.6313	102520000	19	23.5452	23.5532	23.6903	23.1829	23.153	23.1404	22.8129	23.0268	22.0935	NaN	NaN	22.0941	23.115	23.1835
+	4.83632	-0.840228	Q8R001	Q8R001	Microtubule-associated protein RP/EB family member 2	Mapre2	1737	Color2 [A=255, R=255, G=140, B=140]	9	4					2	2	1	8.3	8.3	5.2	36.946	0	6.6879	136720000	15	23.6501	23.7097	23.3672	23.498	23.8986	23.6082	22.6086	22.6559	22.8049	22.985	22.6038	23.0322	23.2864	23.4354
+	2.62395	-1.71051	Q8R080	Q8R080	G2 and S phase-expressed protein 1	Gtse1	1743	Color2 [A=255, R=255, G=140, B=140]	9	4					13	13	13	23.2	23.2	23.2	78.751	0	39.077	288250000	53	25.1286	25.1568	24.4267	24.6939	24.8811	24.74	24.1229	23.5048	23.5615	23.3731	21.2315	22.9703	24.3422	24.5534
+	3.45517	-0.834301	Q8R081	Q8R081	Heterogeneous nuclear ribonucleoprotein L	Hnrnpl	1744	Color2 [A=255, R=255, G=140, B=140]	9	4					21	21	21	50.3	50.3	50.3	63.963	0	323.31	6392500000	220	29.411	29.2984	28.8237	28.7116	29.2184	29.2481	28.7066	28.4897	27.9933	28.2032	28.1147	28.1979	28.7481	28.8527
+	2.07633	-0.975046	Q8R0K9	Q8R0K9	Transcription factor E2F4	E2f4	1751	Color2 [A=255, R=255, G=140, B=140]	9	4					2	2	2	5.9	5.9	5.9	43.833	0	4.3676	13841000	4	20.5552	21.0636	20.0308	20.4938	21.2299	20.4931	19.7857	NaN	19.4686	NaN	NaN	19.7539	NaN	20.1468
+	2.65267	-0.466375	Q8R323	Q8R323	Replication factor C subunit 3	Rfc3	1767	Color2 [A=255, R=255, G=140, B=140]	9	4					7	7	7	25.6	25.6	25.6	40.526	0	45.529	479460000	51	25.4038	25.4343	25.3873	25.2704	25.2432	25.2811	24.7679	25.3434	24.9539	24.8898	24.5796	24.6871	24.9965	25.0158
+	3.89835	-0.749421	Q8VDF2;Q7TMI3	Q8VDF2	E3 ubiquitin-protein ligase UHRF1	Uhrf1	1785	Color2 [A=255, R=255, G=140, B=140]	9	4					33	33	33	49	49	49	88.303	0	277.15	6652900000	262	29.17	29.2606	29.016	29.202	29.3574	29.197	28.418	28.8751	28.6677	28.3872	28.2792	28.0793	28.8451	28.9089
+	3.97321	-1.43929	Q8VDP4	Q8VDP4	Cell cycle and apoptosis regulator protein 2	Ccar2	1792	Color2 [A=255, R=255, G=140, B=140]	9	4					21	21	21	31.1	31.1	31.1	103	0	65.013	997840000	103	26.9898	26.9338	25.7717	26.2392	27.0588	26.5403	25.5768	25.2378	24.9361	24.9286	24.9436	25.275	26.1987	26.1614
+	2.37998	-0.99594	Q8VDW0	Q8VDW0	ATP-dependent RNA helicase DDX39A	Ddx39a	1796	Color2 [A=255, R=255, G=140, B=140]	9	4					9	9	5	24.6	24.6	15.9	49.067	0	34.698	2090500000	120	28.047	27.0498	26.9988	26.7954	27.7657	27.7804	27.1608	26.1961	25.9582	26.3892	26.2731	26.484	27.1093	27.019
+	4.58891	-0.994574	Q8VE10	Q8VE10	N-alpha-acetyltransferase 40	Naa40	1798	Color2 [A=255, R=255, G=140, B=140]	9	4					2	2	2	12.7	12.7	12.7	27.229	0	7.368	125140000	13	23.3354	23.7416	23.5348	23.4482	23.9088	23.4024	22.4915	22.7519	22.4852	22.7821	NaN	22.3258	23.564	23.1877
+	1.97582	-0.706372	Q8VEK3	Q8VEK3	Heterogeneous nuclear ribonucleoprotein U	Hnrnpu	1810	Color2 [A=255, R=255, G=140, B=140]	9	4					26	26	26	44	44	44	87.917	0	323.31	12259000000	291	30.2165	29.4586	29.6315	29.5773	30.3525	30.3975	29.7418	29.4523	29.327	29.118	28.763	28.9936	29.6492	29.7225
+	1.94365	-0.739209	Q91V81	Q91V81	RNA-binding protein 42	Rbm42	1819	Color2 [A=255, R=255, G=140, B=140]	9	4					2	2	2	4.2	4.2	4.2	49.875	0.0094007	1.7705	31812000	5	22.3447	22.0837	NaN	22.6987	22.1162	NaN	21.6854	NaN	NaN	21.3613	NaN	21.6681	NaN	NaN
+	3.17336	-0.973254	Q91VI7	Q91VI7	Ribonuclease inhibitor	Rnh1	1828	Color2 [A=255, R=255, G=140, B=140]	9	4					9	9	9	25.4	25.4	25.4	49.816	0	127	466320000	70	25.5204	25.4109	25.1943	24.948	25.4956	26.0418	24.7213	24.5086	23.8185	24.5473	24.5156	24.6601	25.0263	24.9901
+	4.26426	-1.56699	Q91WM1	Q91WM1	Spermatid perinuclear RNA-binding protein	Strbp	1857	Color2 [A=255, R=255, G=140, B=140]	9	4					7	6	6	11.5	9.5	9.5	73.704	0	10.922	87203000	20	23.2578	23.4831	23.1481	23.3445	23.4707	22.8208	21.5137	21.8064	22.5995	21.1502	21.2781	21.7751	21.8332	22.4382
+	1.53065	-1.41146	Q91YJ2	Q91YJ2	Sorting nexin-4	Snx4	1871	Color2 [A=255, R=255, G=140, B=140]	9	4					3	3	3	8	8	8	51.777	0	10.594	35151000	8	22.5815	22.3989	NaN	21.1472	22.5901	22.4421	20.9975	20.6435	NaN	NaN	NaN	NaN	21.3268	21.2682
+	2.76425	-0.912413	Q91YR7	Q91YR7	Pre-mRNA-processing factor 6	Prpf6	1878	Color2 [A=255, R=255, G=140, B=140]	9	4					14	14	14	15.6	15.6	15.6	106.72	0	21.238	171000000	30	24.1619	23.8187	23.5499	23.2798	24.1534	24.2956	23.5554	22.7421	22.8645	23.1366	22.5785	22.9078	23.8461	23.5946
+	2.29191	-0.822048	Q920Q6;Q61474	Q920Q6	RNA-binding protein Musashi homolog 2	Msi2	1889	Color2 [A=255, R=255, G=140, B=140]	9	4					8	8	8	34.1	34.1	34.1	36.938	0	28.964	980850000	53	27.0039	26.901	26.3015	25.712	26.4878	26.0616	25.8336	25.814	25.7408	25.5343	25.1123	25.5005	26.1695	26.1338
+	3.66415	-0.969338	Q921F2	Q921F2	TAR DNA-binding protein 43	Tardbp	1891	Color2 [A=255, R=255, G=140, B=140]	9	4					11	11	11	29.7	29.7	29.7	44.547	0	61.931	3777500000	128	28.7578	28.6399	27.8679	28.0854	28.6865	28.5165	27.7485	27.6471	27.2557	27.3954	27.208	27.4832	28.1397	28.1251
+	2.41281	-1.22462	Q921M4	Q921M4	Golgin subfamily A member 2	Golga2	1898	Color2 [A=255, R=255, G=140, B=140]	9	4					6	6	6	7.4	7.4	7.4	113.28	0	10.183	61102000	9	23.2189	22.838	22.081	21.1744	22.8132	22.6725	21.1598	21.5902	20.7072	21.4865	21.0762	21.4305	21.7886	21.5111
+	2.294	-0.573492	Q922D4	Q922D4	Serine/threonine-protein phosphatase 6 regulatory subunit 3	Ppp6r3	1908	Color2 [A=255, R=255, G=140, B=140]	9	4					3	3	3	4	4	4	94.652	0	4.5285	59367000	8	22.5937	22.9543	22.1823	22.394	22.506	22.4948	21.8904	21.7865	21.6963	21.6705	22.3502	22.2902	22.0448	22.0215
+	2.16797	-0.835491	Q922K7	Q922K7	Probable 28S rRNA (cytosine-C(5))-methyltransferase	Nop2	1912	Color2 [A=255, R=255, G=140, B=140]	9	4					8	8	8	15.5	15.5	15.5	86.751	0	21.937	354750000	38	25.4195	25.3571	24.718	24.6008	25.0236	24.6285	24.5115	24.6868	24.183	24.251	23.54	23.5622	24.8923	24.5364
+	1.65468	-1.25602	Q922Q2	Q922Q2	Serine/threonine-protein kinase RIO1	Riok1	1915	Color2 [A=255, R=255, G=140, B=140]	9	4					11	11	11	21.7	21.7	21.7	64.91	0	14.537	232550000	26	24.2229	24.0105	23.9003	24.2632	25.5251	24.3949	24.3377	23.5626	22.9426	21.8402	22.9675	NaN	24.1241	23.9195
+	1.9266	-0.786379	Q922Y1	Q922Y1	UBX domain-containing protein 1	Ubxn1	1921	Color2 [A=255, R=255, G=140, B=140]	9	4					3	3	3	17.8	17.8	17.8	33.572	0	5.4421	201390000	17	24.5346	24.3271	23.5341	23.3962	24.4405	24.4792	23.0308	23.6191	22.7585	23.573	23.3756	23.6366	23.7373	23.8126
+	2.09478	-0.788078	Q99JT2;Q9Z2W1	Q99JT2	Serine/threonine-protein kinase 26	Stk26	1953	Color2 [A=255, R=255, G=140, B=140]	9	4					9	9	6	25.2	25.2	17.1	46.613	0	15.579	458220000	38	25.3855	25.605	25.0353	24.6619	25.5035	25.7366	24.838	24.9218	23.7686	24.4885	24.4057	24.7768	24.7388	24.8698
+	4.87678	-1.65451	Q99JV5	Q99JV5	StAR-related lipid transfer protein 4	Stard4	1954	Color2 [A=255, R=255, G=140, B=140]	9	4					1	1	1	5.8	5.8	5.8	25.579	0.0013339	2.8056	9598300	4	NaN	20.9875	NaN	NaN	21.1181	20.9334	NaN	19.2926	NaN	NaN	19.3872	19.3956	NaN	20.5418
+	2.67052	-0.811962	Q99JX7	Q99JX7	Nuclear RNA export factor 1	Nxf1	1957	Color2 [A=255, R=255, G=140, B=140]	9	4					4	4	4	7.4	7.4	7.4	70.299	0	5.7418	59000000	11	22.9495	22.386	22.3829	21.7931	22.7372	22.2968	21.8125	22.0476	21.2762	21.5856	21.4369	21.5149	21.7596	21.8839
+	2.58874	-0.575729	Q99K48	Q99K48	Non-POU domain-containing octamer-binding protein	Nono	1964	Color2 [A=255, R=255, G=140, B=140]	9	4					14	12	12	31.1	29	29	54.54	0	53.296	1457800000	95	26.9747	26.9852	26.6716	26.6996	27.0374	27.3107	26.5073	26.2085	25.9198	26.6392	26.429	26.5208	26.7029	26.7669
+	2.22406	-0.569745	Q99KG3	Q99KG3	RNA-binding protein 10	Rbm10	1969	Color2 [A=255, R=255, G=140, B=140]	9	4					11	11	10	14.2	14.2	13.4	103.49	0	22.903	422540000	54	25.4199	25.2288	25.1188	25.0017	25.3665	24.8031	24.8049	24.7517	24.635	24.9546	24.1353	24.2388	24.9895	24.698
+	2.18294	-0.792733	Q99LH1	Q99LH1	Nucleolar GTP-binding protein 2	Gnl2	1992	Color2 [A=255, R=255, G=140, B=140]	9	4					8	8	8	12.6	12.6	12.6	83.345	0	21.818	146440000	12	23.9816	23.3177	23.5212	22.9001	24.2371	23.8377	22.8199	23.0202	22.8787	22.8307	NaN	22.6497	23.2173	24.0449
+	2.59943	-0.700894	Q99LI5	Q99LI5	Zinc finger protein 281	Znf281	1993	Color2 [A=255, R=255, G=140, B=140]	9	4					5	5	5	8.1	8.1	8.1	96.683	0	17.497	108000000	21	23.5167	23.2603	22.8038	23.3957	23.3853	23.0423	23.0468	22.8271	22.1856	22.4359	22.2448	22.4585	22.814	22.8132
+	2.17144	-1.52177	Q99MK8;Q3UYH7	Q99MK8	Beta-adrenergic receptor kinase 1	Adrbk1	2007	Color2 [A=255, R=255, G=140, B=140]	9	4					15	15	15	22.6	22.6	22.6	79.638	0	41.745	612650000	73	25.9693	25.7357	25.4534	25.4987	26.2271	26.4686	25.3816	24.9358	22.9287	24.9801	23.2538	24.7424	25.2721	25.6412
+	4.63646	-2.06678	Q99N69	Q99N69	Leupaxin	Lpxn	2012	Color2 [A=255, R=255, G=140, B=140]	9	4					8	8	8	31.6	31.6	31.6	43.478	0	144.89	406050000	34	26.1107	25.6541	25.3031	25.0949	25.3318	25.7169	24.2886	23.7144	23.3736	23.7821	22.7727	22.8794	24.876	23.908
+	1.73785	-0.922288	Q99PG2	Q99PG2	Opioid growth factor receptor	Ogfr	2022	Color2 [A=255, R=255, G=140, B=140]	9	4					6	6	6	14.4	14.4	14.4	70.678	0	18.442	127460000	18	24.0585	23.6687	22.5353	23.1421	23.8419	23.6898	22.805	23.2904	22.3349	22.0117	NaN	22.3934	23.388	23.2471
+	4.73351	-3.62028	Q9CPN8;Q5SF07	Q9CPN8	Insulin-like growth factor 2 mRNA-binding protein 3	Igf2bp3	2032	Color2 [A=255, R=255, G=140, B=140]	9	4					19	19	19	40.8	40.8	40.8	63.574	0	118.29	2060600000	125	28.2077	27.9319	28.005	27.7579	27.8795	27.9783	24.9989	25.222	22.1119	24.1108	24.6327	24.9622	27.32	27.0724
+	2.34158	-0.604318	Q9CQC6	Q9CQC6	Basic leucine zipper and W2 domain-containing protein 1	Bzw1	2074	Color2 [A=255, R=255, G=140, B=140]	9	4					12	12	12	30.8	30.8	30.8	48.043	0	22.305	633340000	75	25.431	25.562	25.6093	25.5715	25.8508	25.8846	24.9476	24.8374	24.5248	25.1563	25.2227	25.5945	25.5552	25.3124
+	1.76154	-1.05678	Q9CR00	Q9CR00	26S proteasome non-ATPase regulatory subunit 9	Psmd9	2109	Color2 [A=255, R=255, G=140, B=140]	9	4					8	8	8	34.7	34.7	34.7	24.72	0	13.444	149250000	25	24.142	24.3458	23.1218	23.0244	23.7947	24.0609	22.3675	23.4643	21.7543	22.1236	22.9532	23.486	22.8444	23.3395
+	2.29926	-0.840498	Q9CS42	Q9CS42	Ribose-phosphate pyrophosphokinase 2	Prps2	2132	Color2 [A=255, R=255, G=140, B=140]	9	4					8	4	4	31.8	15.7	15.7	34.786	0	28.404	119710000	17	24.0429	22.9074	23.5404	22.8784	23.4409	23.8451	22.783	22.334	22.5021	22.6368	NaN	22.7542	23.4615	22.7007
+	3.74854	-0.411542	Q9CU62	Q9CU62	Structural maintenance of chromosomes protein 1A	Smc1a	2136	Color2 [A=255, R=255, G=140, B=140]	9	4					44	44	44	38.9	38.9	38.9	143.23	0	98.038	1997600000	247	27.4342	27.4963	27.3983	27.2611	27.2183	27.3189	27.0034	27.1127	26.8171	26.938	27.0384	26.7483	27.022	26.9545
+	3.4053	-0.426329	Q9CW03	Q9CW03	Structural maintenance of chromosomes protein 3	Smc3	2138	Color2 [A=255, R=255, G=140, B=140]	9	4					37	37	37	29.8	29.8	29.8	141.55	0	78.177	2018000000	195	27.4788	27.5701	27.4792	27.043	27.3493	27.3811	26.9524	27.0749	26.837	26.9406	26.997	26.9416	27.0952	27.0553
+	2.43048	-0.779989	Q9CWF2	Q9CWF2	Tubulin beta-2B chain	Tubb2b	2141	Color2 [A=255, R=255, G=140, B=140]	9	4					23	8	2	72.6	28.3	3.6	49.953	0	64.233	13428000000	135	30.2686	30.3587	29.5898	29.5892	30.1173	29.7032	29.6945	29.4795	28.8603	29.2077	28.8066	28.8983	29.6638	29.6081
+	2.40007	-0.67642	Q9CX86	Q9CX86	Heterogeneous nuclear ribonucleoprotein A0	Hnrnpa0	2163	Color2 [A=255, R=255, G=140, B=140]	9	4					9	9	9	43.6	43.6	43.6	30.53	0	196.55	6583800000	80	29.225	29.4324	29.0339	29.0454	29.334	28.8467	28.7146	29.057	28.6473	28.2076	28.0846	28.1479	28.9327	28.8923
+	3.51518	-0.815259	Q9CXY6	Q9CXY6	Interleukin enhancer-binding factor 2	Ilf2	2179	Color2 [A=255, R=255, G=140, B=140]	9	4					7	7	7	29	29	29	43.062	0	21.231	369910000	41	24.8902	25.3916	25.3002	25.2337	25.0246	24.5585	24.416	24.5575	24.2049	23.9854	24.1555	24.188	24.7035	24.6975
+	4.19093	-0.666424	Q9CYR0	Q9CYR0	Single-stranded DNA-binding protein, mitochondrial	Ssbp1	2192	Color2 [A=255, R=255, G=140, B=140]	9	4					3	3	3	25	25	25	17.319	0	34.47	489450000	28	25.4851	25.6146	25.4574	25.1552	25.4418	25.3984	24.6696	24.7723	24.7536	25.1343	24.6546	24.5696	25.2091	25.0727
+	1.99856	-0.751093	Q9CZX0	Q9CZX0	Elongator complex protein 3	Elp3	2215	Color2 [A=255, R=255, G=140, B=140]	9	4					2	2	2	4.9	4.9	4.9	62.384	0.0013304	2.7887	20611000	5	21.283	NaN	21.0917	NaN	21.5127	21.8956	20.9975	NaN	20.8806	20.8087	20.2556	20.531	20.5193	NaN
+	2.64456	-1.10094	Q9D0B6	Q9D0B6	Protein PBDC1	Pbdc1	2225	Color2 [A=255, R=255, G=140, B=140]	9	4					5	5	5	25.3	25.3	25.3	22.223	0	12.133	305550000	42	25.1293	25.318	24.0715	24.5788	24.8195	24.6765	23.8492	24.0005	22.8281	23.5101	23.5438	24.2563	24.4882	24.6486
+	3.63564	-1.00067	Q9D0E1;Q91VC4	Q9D0E1	Heterogeneous nuclear ribonucleoprotein M	Hnrnpm	2228	Color2 [A=255, R=255, G=140, B=140]	9	4					42	42	42	65.6	65.6	65.6	77.648	0	200.37	17549000000	470	30.8353	30.6362	30.4916	30.2326	30.8217	30.6251	30.0888	30.0113	29.5877	29.4771	29.1318	29.3418	30.1295	30.2066
+	2.22273	-0.583789	Q9D0I8	Q9D0I8	mRNA turnover protein 4 homolog	Mrto4	2234	Color2 [A=255, R=255, G=140, B=140]	9	4					11	11	11	45.2	45.2	45.2	27.545	0	23.986	767610000	63	26.253	26.2822	26.425	25.9654	25.7808	25.6375	25.36	25.9714	25.4928	25.4912	25.1853	25.3404	25.7744	25.8342
+	2.9677	-0.875919	Q9D1C1	Q9D1C1	Ubiquitin-conjugating enzyme E2 C	Ube2c	2252	Color2 [A=255, R=255, G=140, B=140]	9	4					5	5	5	35.2	35.2	35.2	19.606	0	19.169	260030000	31	24.5617	24.6531	24.2065	24.2888	24.8425	24.8858	23.4671	23.5271	23.1791	23.9011	23.8561	24.2523	23.9867	24.1786
+	2.77299	-1.01457	Q9D2V7	Q9D2V7	Coronin-7	Coro7	2277	Color2 [A=255, R=255, G=140, B=140]	9	4					16	16	16	26.8	26.8	26.8	100.81	0	41.436	473840000	54	25.1744	25.4892	25.433	25.0811	25.5234	26.0164	24.8623	23.7221	24.1687	24.6906	24.2113	24.9751	25.1629	24.9589
+	2.05195	-0.712766	Q9D5T0	Q9D5T0	ATPase family AAA domain-containing protein 1	Atad1	2289	Color2 [A=255, R=255, G=140, B=140]	9	4					8	8	8	29.6	29.6	29.6	40.744	0	27.092	463930000	49	25.854	25.6422	24.4879	25.3664	25.409	25.1296	24.9337	24.8405	24.3029	24.4002	24.4554	24.6798	24.8203	24.7858
+	2.79791	-0.906229	Q9D6L8	Q9D6L8	Peptidyl-prolyl cis-trans isomerase-like 3	Ppil3	2293	Color2 [A=255, R=255, G=140, B=140]	9	4					4	4	4	31.1	31.1	31.1	18.127	0	22.358	301320000	29	25.2811	24.6722	24.6795	24.3484	24.8171	24.7579	24.2279	24.4056	23.9432	23.7304	23.4865	23.3253	24.4912	24.5507
+	2.4134	-0.586453	Q9D6T0	Q9D6T0	Nitric oxide synthase-interacting protein	Nosip	2296	Color2 [A=255, R=255, G=140, B=140]	9	4					6	6	6	25.9	25.9	25.9	33.209	0	13.439	104630000	14	23.4025	23.4429	22.5538	22.8899	22.9308	23.1723	22.7429	22.295	22.4598	22.6267	22.2945	22.4547	22.9121	23.1491
+	2.04563	-0.653313	Q9D720	Q9D720	Non-structural maintenance of chromosomes element 1 homolog	Nsmce1	2300	Color2 [A=255, R=255, G=140, B=140]	9	4					3	3	3	15.4	15.4	15.4	30.708	0	5.8537	63132000	14	22.7022	22.4405	22.1146	22.4842	22.4173	22.5234	21.7657	22.5673	21.7737	21.69	21.8284	21.1371	22.2361	21.8051
+	2.21133	-1.20414	Q9D787	Q9D787	Peptidyl-prolyl cis-trans isomerase-like 2	Ppil2	2301	Color2 [A=255, R=255, G=140, B=140]	9	4					2	2	2	3.5	3.5	3.5	59.064	0.0017369	2.5915	14754000	6	21.1243	20.244	19.8036	20.2301	21.063	21.1507	19.7938	NaN	19.0489	19.1796	NaN	19.5716	19.8341	19.9649
+	2.47905	-0.529672	Q9D880	Q9D880	Mitochondrial import inner membrane translocase subunit TIM50	Timm50	2315	Color2 [A=255, R=255, G=140, B=140]	9	4					8	8	8	27.8	27.8	27.8	39.776	0	53.544	896940000	75	26.6072	26.2752	25.9102	25.8439	26.4924	26.0841	25.7254	25.8663	25.4694	25.71	25.6879	25.5759	25.9319	26.1526
+	2.09414	-1.33056	Q9DAI2	Q9DAI2	Intraflagellar transport protein 22 homolog	Ift22	2338	Color2 [A=255, R=255, G=140, B=140]	9	4					6	6	6	51.9	51.9	51.9	20.833	0	80.509	169510000	17	24.4873	24.5012	22.959	23.7027	24.4078	24.4047	NaN	22.7531	NaN	22.0252	22.9625	23.2454	23.6777	23.6889
+	2.15123	-0.907866	Q9DAP7	Q9DAP7	Histone chaperone ASF1B	Asf1b	2340	Color2 [A=255, R=255, G=140, B=140]	9	4					2	2	2	17.3	17.3	17.3	22.464	0	3.7151	92558000	9	23.9363	23.3378	NaN	22.698	23.3133	22.6418	22.2904	22.0289	NaN	22.3847	22.1702	22.5137	22.5313	23.2836
+	2.59978	-0.841728	Q9DAW6	Q9DAW6	U4/U6 small nuclear ribonucleoprotein Prp4	Prpf4	2345	Color2 [A=255, R=255, G=140, B=140]	9	4					5	5	5	13.1	13.1	13.1	58.369	0	9.6189	140000000	13	23.3504	23.533	23.9247	23.3522	23.7276	24.3643	23.1339	23.2442	22.7778	22.7442	22.3085	22.9934	22.9871	22.8695
+	1.93751	-1.22659	Q9DBT3	Q9DBT3	Coiled-coil domain-containing protein 97	Ccdc97	2367	Color2 [A=255, R=255, G=140, B=140]	9	4					2	2	2	5.9	5.9	5.9	38.724	0.0071006	1.8348	14136000	3	21.3676	21.7472	NaN	NaN	21.202	21.1343	NaN	NaN	NaN	NaN	20.4408	19.8316	NaN	20.5292
+	2.80937	-0.58962	Q9DBY8	Q9DBY8	Nuclear valosin-containing protein-like	Nvl	2370	Color2 [A=255, R=255, G=140, B=140]	9	4					17	17	17	24.8	24.8	24.8	94.475	0	42.797	527410000	98	25.6742	25.4617	25.2387	25.1021	25.7513	25.4579	25.2253	24.9906	24.5642	24.8133	24.8107	24.744	25.3048	25.4236
+	2.35909	-1.09655	Q9EQ32	Q9EQ32	Phosphoinositide 3-kinase adapter protein 1	Pik3ap1	2399	Color2 [A=255, R=255, G=140, B=140]	9	4					15	15	15	24.4	24.4	24.4	90.927	0	30.853	489990000	70	25.569	25.3749	24.9693	24.9861	26.0644	25.7769	23.6808	23.8468	23.9815	24.7601	24.8351	25.0571	25.0963	25.1655
+	1.85095	-0.914304	Q9EQM6	Q9EQM6	Microprocessor complex subunit DGCR8	Dgcr8	2406	Color2 [A=255, R=255, G=140, B=140]	9	4					4	4	4	6.5	6.5	6.5	86.32	0	15.038	61564000	23	23.0787	22.8982	23.2331	22.8351	22.4954	22.0225	22.1659	22.4592	22.1068	NaN	21.2908	21.2084	NaN	22.1274
+	2.14652	-0.772996	Q9EQN3;Q9Z2S7;P62500	Q9EQN3	TSC22 domain family protein 4	Tsc22d4	2407	Color2 [A=255, R=255, G=140, B=140]	9	4					4	4	4	13.4	13.4	13.4	39.978	0	8.6191	45870000	11	22.5697	22.2969	21.5477	21.596	22.1972	22.3222	21.0257	21.2509	21.1131	21.4152	NaN	21.7716	21.7836	21.2697
+	2.4474	-1.648	Q9ERS5	Q9ERS5	Pleckstrin homology domain-containing family A member 2	Plekha2	2425	Color2 [A=255, R=255, G=140, B=140]	9	4					6	6	6	17.9	17.9	17.9	47.379	0	28.977	310250000	22	26.0055	24.9523	23.577	24.5366	25.3066	25.0275	24.1238	22.7525	23.149	23.2158	NaN	23.0236	24.5025	24.4241
+	2.16666	-1.21651	Q9EST3	Q9EST3	Eukaryotic translation initiation factor 4E transporter	Eif4enif1	2431	Color2 [A=255, R=255, G=140, B=140]	9	4					7	7	7	9.5	9.5	9.5	107.98	0	14.561	180570000	21	24.9874	24.3582	22.9853	23.5487	24.5479	23.9598	23.1268	23.0003	NaN	22.4509	22.5999	23.0624	23.7974	23.6349
+	2.20842	-1.54367	Q9ESZ8;Q99NI3	Q9ESZ8	General transcription factor II-I	Gtf2i	2437	Color2 [A=255, R=255, G=140, B=140]	9	4					8	8	8	10.4	10.4	10.4	112.26	0	14.401	120840000	19	24.1966	23.2341	22.0934	22.966	24.1746	23.859	22.29	22.4821	20.8576	22.3637	21.0437	22.2246	23.0767	23.1078
+	3.03393	-0.583529	Q9JHW4	Q9JHW4	Selenocysteine-specific elongation factor	Eefsec	2446	Color2 [A=255, R=255, G=140, B=140]	9	4					3	3	3	8.6	8.6	8.6	63.538	0	3.9745	24894000	4	21.5388	NaN	21.3919	NaN	21.6656	21.6449	20.9701	NaN	NaN	21.0597	NaN	20.9005	21.5624	20.8995
+	2.17404	-0.80498	Q9JI13	Q9JI13	Something about silencing protein 10	Utp3	2449	Color2 [A=255, R=255, G=140, B=140]	9	4					7	7	7	17.9	17.9	17.9	53.398	0	35.603	137560000	24	23.7429	23.6228	23.2833	23.3801	23.7441	23.8967	22.9254	23.3117	22.4023	22.2415	22.4383	23.5207	23.1354	23.0187
+	2.2596	-0.583719	Q9JK48	Q9JK48	Endophilin-B1	Sh3glb1	2477	Color2 [A=255, R=255, G=140, B=140]	9	4					6	6	5	15.3	15.3	13.2	40.855	0	8.3275	76546000	22	22.7517	22.9542	22.6845	22.8364	22.7234	22.7865	NaN	22.0654	21.5955	22.4782	22.51	22.3796	22.424	22.4515
+	3.20536	-0.926941	Q9JKY0	Q9JKY0	Cell differentiation protein RCD1 homolog	Rqcd1	2488	Color2 [A=255, R=255, G=140, B=140]	9	4					6	6	6	23.7	23.7	23.7	33.601	0	12.363	134720000	18	23.8819	24.1464	23.4363	23.3196	23.7543	23.2971	22.8897	23.0843	22.6267	22.8402	22.1763	22.6568	23.1457	23.2183
+	1.93451	-0.82612	Q9QYS9	Q9QYS9	Protein quaking	Qki	2545	Color2 [A=255, R=255, G=140, B=140]	9	4					5	5	5	17	17	17	37.67	0	8.0953	202170000	20	24.377	25.0421	23.5305	23.796	24.0327	23.9506	23.2452	23.6863	23.5658	23.2552	22.5861	23.4335	23.7228	23.7536
+	4.0295	-1.8493	Q9QZK7	Q9QZK7	Docking protein 3	Dok3	2553	Color2 [A=255, R=255, G=140, B=140]	9	4					6	6	6	14	14	14	48.027	0	11.639	136610000	20	24.7168	23.4912	23.587	23.606	24.329	23.669	22.0633	21.9727	22.0278	NaN	NaN	22.1384	23.831	22.7815
+	3.58839	-0.539837	Q9WUK4	Q9WUK4	Replication factor C subunit 2	Rfc2	2604	Color2 [A=255, R=255, G=140, B=140]	9	4					16	16	16	52.7	52.7	52.7	38.724	0	59.29	1364200000	126	26.8353	26.7918	26.8939	26.8322	26.9109	26.7596	26.2339	26.6802	26.4625	26.2066	26.1632	26.0383	26.5172	26.6284
+	2.39743	-1.32886	Q9WV80	Q9WV80	Sorting nexin-1	Snx1	2615	Color2 [A=255, R=255, G=140, B=140]	9	4					12	10	10	25.1	21.1	21.1	58.951	0	24.596	204000000	33	24.6906	24.2974	23.8629	24.2105	24.333	24.2699	23.2378	22.6471	21.4209	23.4535	23.1592	23.7727	23.5589	23.9938
+	2.29579	-0.887515	Q9WVR4	Q9WVR4	Fragile X mental retardation syndrome-related protein 2	Fxr2	2625	Color2 [A=255, R=255, G=140, B=140]	9	4					6	4	4	12.2	8.2	8.2	73.742	0	16.156	204190000	22	24.4408	24.0127	23.6953	23.4795	24.7229	24.5446	23.6924	23.0742	23.1423	23.1909	22.8083	23.6625	23.6282	23.5965
+	3.13255	-0.964956	Q9Z0H4	Q9Z0H4	CUGBP Elav-like family member 2	Celf2	2629	Color2 [A=255, R=255, G=140, B=140]	9	4					7	7	6	16.3	16.3	15	54.27	0	24.705	570410000	34	25.8606	25.9157	25.2612	25.1321	25.8338	26.0715	24.9483	24.76	24.1697	24.6704	24.6745	25.0621	25.3867	25.4118
+	2.54237	-1.08777	Q9Z108	Q9Z108	Double-stranded RNA-binding protein Staufen homolog 1	Stau1	2636	Color2 [A=255, R=255, G=140, B=140]	9	4					9	9	9	24	24	24	53.924	0	19.788	308030000	32	24.9099	25.1114	25.0349	24.5951	24.8066	24.8953	23.6583	24.3257	24.2002	24.2477	22.5798	23.8148	24.5302	24.0593
+	3.299	-0.426974	Q9Z1M8	Q9Z1M8	Protein Red	Ik	2650	Color2 [A=255, R=255, G=140, B=140]	9	4					9	9	9	19	19	19	65.615	0	50.602	320230000	53	24.917	24.6769	24.6812	24.4558	24.7553	24.6242	24.0698	24.3742	24.3422	24.386	24.0943	24.2819	24.5479	24.4216
+	2.29685	-0.633666	Q9Z1X4	Q9Z1X4	Interleukin enhancer-binding factor 3	Ilf3	2657	Color2 [A=255, R=255, G=140, B=140]	9	4					10	10	9	15.7	15.7	14.3	96.02	0	26.031	441860000	43	25.3093	25.4427	25.6065	25.1825	25.1557	24.8588	24.1123	25.0437	24.8603	24.6777	24.3131	24.7465	24.9431	24.8221
+	4.04736	-0.671779	Q9Z204;Q8BTF8	Q9Z204	Heterogeneous nuclear ribonucleoproteins C1/C2	Hnrnpc	2660	Color2 [A=255, R=255, G=140, B=140]	9	4					16	16	16	60.4	60.4	60.4	34.384	0	167.41	9071500000	170	29.7065	29.7959	29.7317	29.345	29.6126	29.5676	28.8785	29.3531	28.9058	28.974	28.8447	28.7726	29.23	29.4022
+	3.13358	-0.783992	Q9Z2X1	Q9Z2X1	Heterogeneous nuclear ribonucleoprotein F;Heterogeneous nuclear ribonucleoprotein F, N-terminally processed	Hnrnpf	2674	Color2 [A=255, R=255, G=140, B=140]	9	4					16	16	13	52.8	52.8	46.3	45.729	0	323.31	13936000000	282	30.541	30.3537	29.9086	29.7703	30.3436	30.3197	29.7298	29.7794	29.1381	29.2996	29.2286	29.3574	29.8415	29.9229

## Sheet: Up in Male Chr 19
Significant	#NAME?	Difference	Protein IDs	Majority protein IDs	Protein names	Gene names	id	Symbol color	Symbol type	Symbol size	Show label	Only identified by site	Reverse	Potential contaminant	Peptides	Razor + unique peptides	Unique peptides	Sequence coverage [%]	Unique + razor sequence coverage [%]	Unique sequence coverage [%]	Mol. weight [kDa]	Q-value	Score	Intensity	MS/MS count	LFQ intensity SC19_F1	LFQ intensity SC19_F2	LFQ intensity SC19_F3	LFQ intensity SC19_F4	LFQ intensity SC19_F5	LFQ intensity SC19_F6	LFQ intensity SC19_M1	LFQ intensity SC19_M2	LFQ intensity SC19_M3	LFQ intensity SC19_M4	LFQ intensity SC19_M5	LFQ intensity SC19_M6	LFQ intensity SC19_MF_pool_01	LFQ intensity SC19_MF_pool_02
+	2.65984	1.04876	A2AL36	A2AL36	Centriolin	Cntrl	6	Color2 [A=255, R=140, G=140, B=255]	9	4					74	74	74	36.7	36.7	36.7	268.88	0	323.31	3939600000	429	27.6475	27.6072	27.8652	27.7873	27.0604	27.0505	28.8625	28.9037	29.2178	28.3203	28.078	27.9283	28.1442	28.02
+	3.03839	0.783141	A2BH40;E9Q4N7	A2BH40	AT-rich interactive domain-containing protein 1A	Arid1a	15	Color2 [A=255, R=140, G=140, B=255]	9	4					17	17	17	10.4	10.4	10.4	242.09	0	50.865	588680000	76	24.7613	24.8312	25.1043	25.0959	24.8414	25.2665	25.4718	25.8564	26.3635	25.469	25.9522	25.4865	25.1895	25.4294
+	1.94599	0.760075	A3KGV1	A3KGV1	Outer dense fiber protein 2	Odf2	16	Color2 [A=255, R=140, G=140, B=255]	9	4					21	21	21	31.2	31.2	31.2	95.54	0	112.55	946150000	127	25.6744	25.5687	26.0239	25.9057	25.3767	25.3743	26.5135	26.7136	27.2458	26.2486	26.0525	25.7102	25.9682	25.9879
+	4.22152	0.593335	E9PVX6	E9PVX6		Mki67	117	Color2 [A=255, R=140, G=140, B=255]	9	4					129	129	129	55.3	55.3	55.3	350.86	0	323.31	24927000000	1234	30.5411	30.3538	30.4203	30.4096	30.4018	30.6688	30.8955	30.8602	31.084	30.983	31.351	31.1819	30.6964	30.8027
+	2.34744	1.48916	E9Q6J5	E9Q6J5		Bod1l	128	Color2 [A=255, R=140, G=140, B=255]	9	4					5	5	5	2.1	2.1	2.1	327.45	0	10.258	49125000	8	20.4984	20.9579	NaN	21.1384	20.7372	20.9071	21.8062	21.8759	23.5964	22.7646	21.2433	22.7354	20.7712	21.5363
+	3.60878	0.672326	E9Q7G0	E9Q7G0		Numa1	130	Color2 [A=255, R=140, G=140, B=255]	9	4					63	63	63	37.7	37.7	37.7	235.63	0	222.06	3206700000	424	27.4914	27.6802	27.3896	27.2151	27.5827	27.6601	27.8634	28.1681	27.9826	28.3506	28.5183	28.1703	27.8418	27.8405
+	1.94264	0.826757	O09131	O09131	Glutathione S-transferase omega-1	Gsto1	169	Color2 [A=255, R=140, G=140, B=255]	9	4					2	2	2	7.1	7.1	7.1	27.497	0.00090539	2.9576	54103000	3	21.9056	21.4475	NaN	21.2555	21.4815	21.453	21.8777	21.7741	21.946	22.5509	22.8648	22.9988	21.7869	22.1123
+	1.79501	1.33235	O88502;E9Q4S1	O88502	High affinity cAMP-specific and IBMX-insensitive 3,5-cyclic phosphodiesterase 8A	Pde8a	271	Color2 [A=255, R=140, G=140, B=255]	9	4					7	7	7	9.5	9.5	9.5	93.17	0	16.655	97521000	16	22.3895	23.0221	21.2598	21.5955	21.8143	20.7864	24.4214	23.5201	23.3027	22.9588	22.3674	22.2914	22.2758	22.6025
+	3.3143	1.03036	P01899;P01897;P01898;P14427;P01896;P06339	P01899;P01897	H-2 class I histocompatibility antigen, D-B alpha chain;H-2 class I histocompatibility antigen, L-D alpha chain	H2-D1;H2-L	306	Color2 [A=255, R=140, G=140, B=255]	9	4					14	14	8	42	42	27.9	40.836	0	29.113	691520000	86	24.736	25.0192	25.1049	25.27	24.9735	24.9081	25.5613	26.0808	25.4503	26.0873	26.3349	26.6792	25.4991	25.5217
+	2.0429	2.10588	P01901;P14428;P03991;P04223	P01901;P14428;P03991;P04223	H-2 class I histocompatibility antigen, K-B alpha chain;H-2 class I histocompatibility antigen, K-Q alpha chain;H-2 class I histocompatibility antigen, K-W28 alpha chain;H-2 class I histocompatibility antigen, K-K alpha chain	H2-K1	307	Color2 [A=255, R=140, G=140, B=255]	9	4					8	6	2	24.7	19.5	8.1	41.301	0	10.612	89122000	22	NaN	21.2725	NaN	NaN	21.3022	NaN	23.5808	22.7471	22.2872	23.6942	23.7003	24.35	NaN	22.5442
+	1.67499	1.63182	P05201	P05201	Aspartate aminotransferase, cytoplasmic	Got1	317	Color2 [A=255, R=140, G=140, B=255]	9	4					6	6	6	21.8	21.8	21.8	46.247	0	16.122	53042000	12	NaN	20.686	NaN	21.0369	20.94	20.9706	22.0778	21.2165	22.1278	NaN	23.4076	23.8713	22.0923	21.9561
+	2.14909	1.48557	P05627	P05627	Transcription factor AP-1	Jun	320	Color2 [A=255, R=140, G=140, B=255]	9	4					3	3	3	12.9	12.9	12.9	35.943	0	29.949	183230000	19	22.8324	22.3256	23.4901	23.2797	21.9642	21.9393	24.727	24.7049	24.9456	23.9671	23.6992	22.7008	23.8776	23.6084
+	2.14037	0.732599	P09528	P09528	Ferritin heavy chain;Ferritin heavy chain, N-terminally processed	Fth1	344	Color2 [A=255, R=140, G=140, B=255]	9	4					10	10	10	54.9	54.9	54.9	21.066	0	26.894	1229000000	79	26.278	26.3148	25.5691	26.3644	25.6221	25.7265	27.2775	27.0294	26.4402	26.2806	26.5238	26.7189	26.0943	26.4965
+	1.96736	0.984468	P10852	P10852	4F2 cell-surface antigen heavy chain	Slc3a2	357	Color2 [A=255, R=140, G=140, B=255]	9	4					13	13	13	29.5	29.5	29.5	58.336	0	46.049	717020000	83	24.3038	25.4673	24.7715	25.4518	25.2168	25.0168	25.4887	25.7358	25.478	25.8195	26.6561	26.9568	25.7601	25.6164
+	4.50315	2.08994	P10922	P10922	Histone H1.0;Histone H1.0, N-terminally processed	H1f0	359	Color2 [A=255, R=140, G=140, B=255]	9	4					3	3	3	17.5	17.5	17.5	20.861	0	7.1958	74781000	13	20.8567	20.3632	20.8663	NaN	20.3464	20.6122	22.3447	22.4746	22.3492	23.737	22.3352	22.9526	22.5514	22.3416
+	2.84175	0.946569	P11911	P11911	B-cell antigen receptor complex-associated protein alpha chain	Cd79a	367	Color2 [A=255, R=140, G=140, B=255]	9	4					4	4	4	27.7	27.7	27.7	24.583	0	16.46	173580000	15	22.8149	22.7827	23.3077	23.6353	23.3123	22.9127	23.68	23.8173	23.936	23.8324	24.5599	24.6195	23.3712	23.6968
+	2.39552	0.601385	P13373;P13372	P13373;P13372	Immunoglobulin omega chain;Immunoglobulin iota chain	Vpreb2;Vpreb1	375	Color2 [A=255, R=140, G=140, B=255]	9	4					2	2	2	11.3	11.3	11.3	16.052	0.0056383	1.9781	270690000	10	24.3613	24.0802	23.5773	NaN	24.1481	23.8236	24.6868	24.8454	24.3705	24.8378	24.4196	24.4366	24.2778	24.332
+	2.21226	0.96858	P15066	P15066	Transcription factor jun-D	Jund	392	Color2 [A=255, R=140, G=140, B=255]	9	4					3	3	3	14.4	14.4	14.4	34.904	0	15.637	117450000	22	22.6189	23.2003	22.2096	22.8902	22.1714	22.2382	23.6815	24.2972	23.8321	22.9656	23.4893	22.8743	22.8419	23.1155
+	2.84351	1.62221	P15379	P15379	CD44 antigen	Cd44	393	Color2 [A=255, R=140, G=140, B=255]	9	4					6	6	6	8.5	8.5	8.5	85.616	0	13.967	310090000	22	23.3191	23.3016	24.1883	24.2123	23.3553	22.0231	25.0083	24.7247	25.6235	25.007	24.3947	25.3746	23.9715	24.7109
+	2.34707	1.12799	P16951	P16951	Cyclic AMP-dependent transcription factor ATF-2	Atf2	407	Color2 [A=255, R=140, G=140, B=255]	9	4					4	3	3	12.5	10.3	10.3	52.297	0	7.2626	89903000	14	21.6088	22.6503	21.8891	22.6166	21.6195	21.806	22.804	24.0499	23.6403	22.9554	23.0762	22.4324	22.6004	22.2528
+	2.91565	0.979804	P20029	P20029	78 kDa glucose-regulated protein	Hspa5	435	Color2 [A=255, R=140, G=140, B=255]	9	4					31	29	29	54.4	51.9	51.9	72.421	0	297.8	9985500000	365	28.6955	29.0812	28.645	29.2197	28.8211	28.9101	29.252	29.7046	29.4667	29.9814	30.3864	30.4602	29.3921	29.5352
+	2.34744	0.880588	P24270;Q8BI29	P24270	Catalase	Cat	456	Color2 [A=255, R=140, G=140, B=255]	9	4					21	21	21	49.7	49.7	49.7	59.795	0	60.182	1731400000	112	26.336	26.6225	26.2848	26.8078	26.147	26.1799	26.9117	26.9779	26.6338	27.4978	27.566	28.0743	26.9188	26.9637
+	2.17541	0.692693	P27546	P27546	Microtubule-associated protein 4	Map4	484	Color2 [A=255, R=140, G=140, B=255]	9	4					2	2	2	2.5	2.5	2.5	117.43	0.0017376	2.5953	37632000	6	21.1107	21.5136	NaN	21.4088	20.9108	21.2306	21.3441	22.0901	22.2041	21.8485	NaN	22.1512	21.4221	21.6441
+	2.49968	1.09119	P27773	P27773	Protein disulfide-isomerase A3	Pdia3	488	Color2 [A=255, R=140, G=140, B=255]	9	4					24	24	24	56.2	56.2	56.2	56.678	0	187.25	3724500000	179	26.9951	27.7316	27.1828	27.7639	27.2333	27.2674	27.8075	28.1945	27.8022	28.6908	28.9223	29.304	28.0644	28.0677
+	2.09234	1.02415	P49025	P49025	Citron Rho-interacting kinase	Cit	607	Color2 [A=255, R=140, G=140, B=255]	9	4					26	26	26	14.1	14.1	14.1	235.39	0	53.448	532940000	78	24.4253	23.5959	24.7356	24.8444	24.9301	24.7525	26.1841	25.4973	26.3739	25.1929	24.9576	25.2229	25.1088	25.4586
+	3.50502	0.957388	P57780;Q7TPR4;Q9JI91;O88990	P57780	Alpha-actinin-4	Actn4	684	Color2 [A=255, R=140, G=140, B=255]	9	4					29	29	29	39.7	39.7	39.7	104.98	0	202.68	1715100000	198	25.9775	26.5248	26.392	27.0172	26.2772	26.0569	26.9755	27.2831	27.6103	27.3805	27.2364	27.5042	26.8507	26.813
+	2.28954	0.648147	P60766	P60766	Cell division control protein 42 homolog	Cdc42	706	Color2 [A=255, R=140, G=140, B=255]	9	4					6	5	5	41.9	36.1	36.1	21.258	0	36.903	582900000	61	24.4168	25.3346	24.8521	25.2698	25.0683	25.039	25.3862	25.6218	25.3076	25.6276	25.7983	26.128	25.699	25.3817
+	1.61345	1.21748	P68433	P68433	Histone H3.1	Hist1h3a	830	Color2 [A=255, R=140, G=140, B=255]	9	4					7	1	1	48.5	23.5	23.5	15.404	0	27.578	200070000	14	NaN	23.3207	22.9046	23.3446	21.815	NaN	23.1553	24.7754	24.8864	23.8586	23.7238	23.9829	25.2137	24.5938
+	2.40676	1.17345	P81269	P81269	Cyclic AMP-dependent transcription factor ATF-1	Atf1	866	Color2 [A=255, R=140, G=140, B=255]	9	4					4	2	2	11.5	5.6	5.6	29.237	0.0032666	2.0784	118430000	5	22.8807	22.5509	22.8379	NaN	22.7878	22.5751	24.0515	24.8658	23.8045	NaN	23.6492	23.1286	NaN	23.635
+	2.18432	0.784462	P83870	P83870	PHD finger-like domain-containing protein 5A	Phf5a	868	Color2 [A=255, R=140, G=140, B=255]	9	4					1	1	1	11.8	11.8	11.8	12.405	0	4.4409	27622000	2	20.7642	21.0889	NaN	21.271	21.2862	21.0407	21.5224	21.8913	22.2104	NaN	NaN	NaN	21.4685	21.4077
+	2.19465	1.02833	P97315	P97315	Cysteine and glycine-rich protein 1	Csrp1	884	Color2 [A=255, R=140, G=140, B=255]	9	4					5	5	5	42	42	42	20.583	0	13.659	110030000	19	21.6061	22.2552	22.2595	22.5186	22.1051	22.9755	22.9779	22.4819	23.2785	23.3074	23.6808	24.1635	23.1467	23.0372
+	2.75394	0.817925	Q01147	Q01147	Cyclic AMP-responsive element-binding protein 1	Creb1	928	Color2 [A=255, R=140, G=140, B=255]	9	4					4	4	2	10.3	10.3	5.6	36.674	0	21.398	1317300000	45	26.2256	26.1229	26.0235	26.3013	25.9952	26.1008	26.9661	27.5518	27.2043	26.6118	27.0955	26.2473	26.6418	26.4651
+	2.83007	0.735378	Q02650	Q02650	Paired box protein Pax-5	Pax5	938	Color2 [A=255, R=140, G=140, B=255]	9	4					4	4	4	17.9	17.9	17.9	42.231	0	19.923	78497000	12	22.1974	21.9029	22.0575	22.0939	22.5351	22.6668	22.973	23.2118	23.2074	NaN	22.7763	22.7196	22.4356	22.2952
+	2.05503	0.899167	Q05816	Q05816	Fatty acid-binding protein, epidermal	Fabp5	950	Color2 [A=255, R=140, G=140, B=255]	9	4					6	6	6	38.5	38.5	38.5	15.137	0	36.993	735130000	80	24.3663	25.2603	24.8781	24.8094	25.4292	25.8934	25.6042	25.7002	25.6261	26.1395	26.5101	26.4515	25.6635	25.6487
+	2.00578	0.758296	Q2YDW7	Q2YDW7	N-lysine methyltransferase SETD8	Setd8	975	Color2 [A=255, R=140, G=140, B=255]	9	4					3	3	3	12	12	12	38.845	0	7.6034	58322000	6	21.7978	21.6248	NaN	22.0412	22.4374	NaN	23.1208	22.6533	22.2984	22.795	NaN	22.8005	21.9545	22.0351
+	2.69393	0.872317	Q3THK3	Q3THK3	General transcription factor IIF subunit 1	Gtf2f1	989	Color2 [A=255, R=140, G=140, B=255]	9	4					12	12	12	31.3	31.3	31.3	57.241	0	190.17	966010000	97	25.6429	25.7427	25.673	25.9865	24.9974	25.5281	26.2407	26.864	26.9525	25.9765	26.5983	26.1726	25.9368	26.24
+	3.02648	0.746161	Q5PSV9	Q5PSV9	Mediator of DNA damage checkpoint protein 1	Mdc1	1091	Color2 [A=255, R=140, G=140, B=255]	9	4					4	4	4	2.8	2.8	2.8	184.67	0	5.8641	60267000	5	21.57	21.7941	21.3991	21.6814	22.0637	21.6488	21.9459	22.3082	22.3904	22.5645	22.4876	22.9373	22.1922	21.8627
+	4.93103	1.11299	Q61033	Q61033	Lamina-associated polypeptide 2, isoforms alpha/zeta	Tmpo	1144	Color2 [A=255, R=140, G=140, B=255]	9	4					31	31	20	55.8	55.8	36.9	75.167	0	323.31	13618000000	353	29.222	29.2927	29.2141	29.6074	29.0606	29.3092	29.9229	30.3244	30.7148	30.3828	30.6852	30.3538	29.8687	29.9038
+	3.45836	2.16212	Q61043	Q61043	Ninein	Nin	1146	Color2 [A=255, R=140, G=140, B=255]	9	4					33	33	33	18.5	18.5	18.5	234.72	0	85.29	580950000	83	23.6735	23.4665	23.692	24.9839	24.1527	22.8722	26.4402	26.6621	26.7117	25.3032	25.3282	25.3681	25.4347	25.1131
+	3.32568	1.13609	Q61103	Q61103	Zinc finger protein ubi-d4	Dpf2	1150	Color2 [A=255, R=140, G=140, B=255]	9	4					7	7	7	25.6	25.6	25.6	44.229	0	12.995	216960000	16	23.06	23.4664	23.298	23.9201	22.8239	23.4187	23.8186	24.3906	24.8832	24.3799	24.8951	24.4363	23.7884	23.84
+	3.80748	0.600409	Q61687	Q61687	Transcriptional regulator ATRX	Atrx	1183	Color2 [A=255, R=140, G=140, B=255]	9	4					45	45	45	23.2	23.2	23.2	278.58	0	175.51	2221100000	287	26.9167	27.209	26.8959	26.9121	26.8649	27.2011	27.5256	27.8274	27.6163	27.2691	27.6326	27.731	27.1856	27.3758
+	4.26898	0.973585	Q6A065	Q6A065	Centrosomal protein of 170 kDa	Cep170	1266	Color2 [A=255, R=140, G=140, B=255]	9	4					29	29	29	23.9	23.9	23.9	175.05	0	106.07	860510000	125	25.3594	25.5826	25.3035	25.6328	25.3201	24.9604	26.3742	26.3788	26.8056	26.2336	26.0611	26.147	25.9225	25.8779
+	2.83499	0.856239	Q6PDG5	Q6PDG5	SWI/SNF complex subunit SMARCC2	Smarcc2	1315	Color2 [A=255, R=140, G=140, B=255]	9	4					20	11	11	21.2	14.7	14.7	132.6	0	100.2	562780000	66	24.9739	24.8115	25.2057	24.8183	24.5465	24.9964	25.2051	25.9307	26.1542	25.3823	26.2557	25.5617	25.2232	25.3201
+	2.04145	2.09619	Q6URW6	Q6URW6	Myosin-14	Myh14	1336	Color2 [A=255, R=140, G=140, B=255]	9	4					6	1	1	3.1	0.6	0.6	228.58	0.00089405	2.8589	1196800000	6	25.4531	25.0374	25.6369	25.3675	26.1955	NaN	28.1372	NaN	28.4635	26.3021	NaN	NaN	26.7689	26.2385
+	3.35492	0.861213	Q80WJ7	Q80WJ7	Protein LYRIC	Mtdh	1422	Color2 [A=255, R=140, G=140, B=255]	9	4					21	21	21	44.9	44.9	44.9	63.845	0	323.31	4854100000	245	27.6933	27.8746	27.753	28.1991	27.4327	28.4194	28.4052	28.8788	28.7956	28.6392	28.9292	28.8915	28.4349	28.3092
+	2.8641	0.89141	Q8BTM8;Q8VHX6	Q8BTM8	Filamin-A	Flna	1543	Color2 [A=255, R=140, G=140, B=255]	9	4					25	25	24	14.6	14.6	14.3	281.22	0	71.088	705040000	90	25.1403	25.7234	25.3254	25.3307	24.6917	24.567	25.9752	25.939	25.6998	26.1543	25.9341	26.4246	25.6504	25.7857
+	2.70679	0.864455	Q8BTY2	Q8BTY2	Sodium bicarbonate cotransporter 3	Slc4a7	1546	Color2 [A=255, R=140, G=140, B=255]	9	4					3	3	3	3.2	3.2	3.2	116.51	0	3.4355	30272000	6	20.2835	20.8629	20.6067	20.9883	20.8086	NaN	22.1263	21.3249	21.6695	21.1576	21.3244	21.844	20.9442	20.7883
+	2.43574	0.781299	Q8BV49;Q504N7	Q8BV49;Q504N7	Pyrin and HIN domain-containing protein 1;Pyrin and HIN domain-containing protein 1-like	Pyhin1	1555	Color2 [A=255, R=140, G=140, B=255]	9	4					12	12	11	35	35	31.7	46.886	0	77.335	1106800000	101	25.7632	25.4283	25.8756	25.2609	25.7941	26.4093	26.5164	26.3569	26.9498	26.8921	26.2206	26.2834	26.1921	26.1831
+	1.83565	1.37272	Q8BVI4	Q8BVI4	Dihydropteridine reductase	Qdpr	1560	Color2 [A=255, R=140, G=140, B=255]	9	4					1	1	1	4.6	4.6	4.6	25.57	0.0033473	2.2526	27239000	7	20.5655	21.217	NaN	21.4199	21.3919	NaN	NaN	NaN	NaN	NaN	22.2823	22.7603	21.6748	21.4664
+	2.40526	1.64961	Q8BYW1	Q8BYW1	Rho GTPase-activating protein 25	Arhgap25	1581	Color2 [A=255, R=140, G=140, B=255]	9	4					4	4	4	6.5	6.5	6.5	73.382	0	5.8616	52917000	12	NaN	21.2506	21.0841	NaN	NaN	20.6087	22.4196	22.5472	22.1931	23.8617	22.2512	22.5116	21.8629	22.0442
+	1.38501	4.23484	Q8C0T5;G3X9J0;Q80TE4	Q8C0T5	Signal-induced proliferation-associated 1-like protein 1	Sipa1l1	1592	Color2 [A=255, R=140, G=140, B=255]	9	4					23	23	23	19.9	19.9	19.9	197.03	0	66.507	205080000	41	NaN	19.7095	NaN	NaN	19.6152	NaN	26.0024	22.307	26.09	24.9548	20.5864	23.4427	23.3991	21.3037
+	2.98576	0.978743	Q8K2F0	Q8K2F0	Bromodomain-containing protein 3	Brd3	1699	Color2 [A=255, R=140, G=140, B=255]	9	4					19	19	14	31.4	31.4	24.7	79.761	0	52.196	1108100000	121	25.4841	25.5023	26.027	25.8138	25.4233	25.8895	26.1134	26.7262	27.136	27.1873	26.6923	26.1571	26.1676	26.2235
+	2.63894	0.678262	Q8K2H1	Q8K2H1	Periphilin-1	Pphln1	1700	Color2 [A=255, R=140, G=140, B=255]	9	4					2	2	2	7.1	7.1	7.1	43.835	0.0025478	2.4059	27374000	4	20.4773	20.6871	21.1668	NaN	20.6667	20.8185	21.3747	21.1666	21.6696	21.8378	21.4543	21.1462	20.7798	20.4787
+	2.72568	0.68965	Q8K305	Q8K305	Kinetochore-associated protein NSL1 homolog	Nsl1	1710	Color2 [A=255, R=140, G=140, B=255]	9	4					4	4	4	19.2	19.2	19.2	31.739	0	20.856	153120000	22	22.9066	23.5091	23.2532	23.3199	22.6913	23.2213	24.0507	24.0086	23.5101	23.8628	24.11	23.4972	23.6872	23.2457
+	2.84672	0.788513	Q8K389	Q8K389	CDK5 regulatory subunit-associated protein 2	Cdk5rap2	1715	Color2 [A=255, R=140, G=140, B=255]	9	4					33	33	33	21.5	21.5	21.5	205.94	0	95.262	952600000	148	25.6615	25.7238	25.7894	25.7795	25.4524	25.3849	26.679	26.811	26.8544	26.0626	26.1877	25.9278	26.1468	25.9901
+	2.0359	1.06364	Q8K3C3	Q8K3C3	Protein LZIC	Lzic	1717	Color2 [A=255, R=140, G=140, B=255]	9	4					1	1	1	5.3	5.3	5.3	21.536	0.0070922	1.8268	9330600	2	NaN	20.7147	NaN	20.6046	NaN	NaN	NaN	NaN	NaN	NaN	21.6365	21.8101	NaN	NaN
+	2.65515	0.686065	Q8R0A0	Q8R0A0	General transcription factor IIF subunit 2	Gtf2f2	1746	Color2 [A=255, R=140, G=140, B=255]	9	4					16	16	16	65.1	65.1	65.1	28.381	0	103.74	2205800000	117	26.7275	26.9204	27.2212	27.1202	26.798	26.8945	27.4979	27.9297	28.1652	27.1456	27.6315	27.4283	27.4002	27.2523
+	4.43118	1.86013	Q8R0S1	Q8R0S1	Cyclic AMP-dependent transcription factor ATF-7	Atf7	1752	Color2 [A=255, R=140, G=140, B=255]	9	4					6	6	5	19.4	19.4	16.7	44.607	0	39.992	218420000	28	22.4357	22.6114	23.3003	23.1628	22.5013	22.5467	24.5165	25.2406	25.2993	24.3727	24.3087	23.9814	23.8263	24.1157
+	2.87625	0.801744	Q91WQ3	Q91WQ3	Tyrosine--tRNA ligase, cytoplasmic;Tyrosine--tRNA ligase, cytoplasmic, N-terminally processed	Yars	1860	Color2 [A=255, R=140, G=140, B=255]	9	4					22	22	22	41.3	41.3	41.3	59.105	0	44.495	1027200000	127	25.5464	25.6497	26.0896	25.9363	25.5886	25.7644	26.0577	26.4256	26.3274	26.5281	26.9419	27.1048	26.1148	26.2582
+	4.69173	0.835939	Q921U8	Q921U8	Smoothelin	Smtn	1903	Color2 [A=255, R=140, G=140, B=255]	9	4					18	18	18	22	22	22	100.29	0	85.005	580510000	69	25.1659	25.1135	24.6703	24.5867	25.0233	24.9437	25.659	25.8015	25.9884	25.6417	25.6553	25.7733	25.1619	25.5072
+	2.61307	0.630671	Q922Q8	Q922Q8	Leucine-rich repeat-containing protein 59	Lrrc59	1917	Color2 [A=255, R=140, G=140, B=255]	9	4					10	10	10	35.2	35.2	35.2	34.877	0	69.748	1643300000	85	26.3738	26.5561	26.3085	26.9976	26.3887	26.6421	26.8746	27.5715	27.4038	27.0006	26.9094	27.291	26.8463	26.9106
+	1.7664	1.11576	Q922R8	Q922R8	Protein disulfide-isomerase A6	Pdia6	1918	Color2 [A=255, R=140, G=140, B=255]	9	4					10	10	10	32.7	32.7	32.7	48.1	0	43.837	676180000	67	24.4233	25.3551	24.1684	25.5619	24.8615	24.6821	24.9947	25.2616	25.5607	26.4069	26.5565	26.9664	25.8181	25.1374
+	3.04216	0.730533	Q99JF8	Q99JF8	PC4 and SFRS1-interacting protein	Psip1	1947	Color2 [A=255, R=140, G=140, B=255]	9	4					26	26	25	52.8	52.8	51.3	59.696	0	323.31	9018000000	268	28.6594	28.7544	29.1428	29.1213	28.6645	29.1128	29.1596	29.7395	29.8314	29.7423	29.9671	29.3985	29.2095	29.246
+	3.01504	0.642425	Q99K43	Q99K43	Protein regulator of cytokinesis 1	Prc1	1963	Color2 [A=255, R=140, G=140, B=255]	9	4					14	14	14	29.4	29.4	29.4	70.289	0	38.276	699850000	70	25.1474	25.3958	24.9499	25.369	25.0942	25.5604	25.7428	26.1366	26.0581	25.6461	26.1732	25.6145	25.4523	25.4449
+	3.00864	1.01929	Q9DBR7;Q8BG95	Q9DBR7	Protein phosphatase 1 regulatory subunit 12A	Ppp1r12a	2365	Color2 [A=255, R=140, G=140, B=255]	9	4					8	8	8	8.2	8.2	8.2	114.99	0	20.485	171010000	23	22.8959	22.9151	23.6078	23.3729	22.8518	22.3982	24.1742	24.1161	24.0201	23.9732	23.4301	24.444	23.4425	23.3985
+	2.00128	0.717417	Q9ESP1	Q9ESP1	Stromal cell-derived factor 2-like protein 1	Sdf2l1	2429	Color2 [A=255, R=140, G=140, B=255]	9	4					6	6	6	29.9	29.9	29.9	23.648	0	27.877	130800000	16	22.7336	22.9801	NaN	22.6168	23.0683	22.918	23.3825	23.5015	23.4702	23.0137	23.7243	24.3923	23.0011	23.1596
+	1.98083	1.51293	Q9JL35	Q9JL35	High mobility group nucleosome-binding domain-containing protein 5	Hmgn5	2491	Color2 [A=255, R=140, G=140, B=255]	9	4					10	10	10	33.5	33.5	33.5	45.343	0	56.622	185270000	35	22.0487	22.9834	21.6902	22.1914	23.24	23.1483	23.3324	22.8627	23.462	24.7427	24.6073	25.3726	23.8656	23.4762
+	2.49236	1.34933	Q9JMH6	Q9JMH6	Thioredoxin reductase 1, cytoplasmic	Txnrd1	2505	Color2 [A=255, R=140, G=140, B=255]	9	4					6	6	6	13.1	13.1	13.1	67.083	0	14.04	115900000	23	21.9795	22.882	22.2134	22.2374	21.9183	21.5612	22.6291	23.5059	22.6669	23.6131	23.9497	24.5231	22.9894	22.6073
+	3.72997	0.778416	Q9QUI0;Q62159;P62746	Q9QUI0;Q62159	Transforming protein RhoA;Rho-related GTP-binding protein RhoC	Rhoa;Rhoc	2508	Color2 [A=255, R=140, G=140, B=255]	9	4					6	6	6	33.2	33.2	33.2	21.782	0	83.051	378460000	32	24.0593	24.623	24.6436	24.3836	24.2924	23.9562	25.0083	25.054	24.9039	25.4034	25.0723	25.1867	24.6946	24.9248
+	2.40095	0.783528	Q9R0P9	Q9R0P9	Ubiquitin carboxyl-terminal hydrolase isozyme L1	Uchl1	2567	Color2 [A=255, R=140, G=140, B=255]	9	4					2	2	2	13.9	13.9	13.9	24.838	0	6.9146	37772000	9	21.2201	NaN	21.5521	21.4388	21.4067	21.2005	21.5996	21.9783	NaN	22.1224	22.3237	22.7117	NaN	21.6654
+	2.20878	0.77283	Q9WTQ5	Q9WTQ5	A-kinase anchor protein 12	Akap12	2590	Color2 [A=255, R=140, G=140, B=255]	9	4					31	31	31	31.7	31.7	31.7	180.69	0	96.091	670650000	106	25.156	25.7368	25.0286	25.2903	24.8964	24.5603	25.5703	25.8063	25.4386	25.9086	26.0838	26.4976	25.4972	25.6781
+	2.63375	1.23485	Q9Z0P4	Q9Z0P4	Paralemmin-1	Palm	2632	Color2 [A=255, R=140, G=140, B=255]	9	4					9	9	9	34.7	34.7	34.7	41.614	0	124.87	595250000	66	25.1766	24.9319	24.5409	24.752	24.3005	23.8434	26.5511	26.277	26.1211	25.6098	25.1451	25.2502	25.3989	25.4301

## Sheet: Enriched on Female X uniquely
Proteins enriched only on female X chromosomes (37)	Proteins enriched only on female X chromosomes (37)	Proteins enriched only on female X chromosomes (37)	Proteins enriched only on female X chromosomes (37)
- excluding those also enriched on chr19 -	- excluding those also enriched on chr19 -	- excluding those also enriched on chr19 -	- excluding those also enriched on chr19 -
Unique in female X
gene name
Ppig
Grcc10
Pnn
Sap18
Nedd4
Pold1
Larp7
Pafah1b3
Tcf12
Scaf8
Nup98
Topbp1
Tifa
Zc3hc1
Grwd1
Fam64a
Wdr26
Cdc34
Rbm4b
Dcp1a
Ppan
Ciao1
Dnaja3
Rwdd4
Cotl1
Mtfr1l
Cd2bp2
Ssu72
Fip1l1
Pdcl
Ubl5
Hic2
Son
Ppie
H2afy
Prpf40a

## Sheet: Enriched on Male X uniquely
Proteins enriched only on male X chromosomes (33)
- excluding those also enriched on chr19 -
Unique in male X
Gene names
Gfra2
Cdk2ap1;Cdk2ap2
Atp2a2
Ighm
H2-K1;H2-D1
Prnp
Hsp90b1
Cd79b
Glud1
Psmb8
Dbi
Hcls1
Anxa11
Uqcrh
Esyt1
Reep5
Zfp91
Whsc1l1
Mcph1
Pck2
Gatad2a
Gatad2b
Sh3bgrl3
Rpn1
Dnajb11
Arhgdia
Tmed5
Serpinb1a
D10Jhu81e
Inpp5d
Tagln2
Mbd2
