# Supplementary material for: Hbo1 and Msl complexes preserve differential compaction and H3K27me3 marking of active and inactive X chromosomes during mitosis
Source: Research Square preprint supplement (doi:10.21203/rs.3.rs-4687808/v1), 2024-07-16
Supplement: Supplementary file 2 [file 9cdff15f3a32fb0769bbb4d1.xlsx]

## Sheet: proteinGroups
Protein IDs	Majority protein IDs	Protein names	Gene names	Mol. weight [kDa]	Intensity	Intensity Female_chr Xa_1	Intensity Female_chr Xa_2	Intensity Female_chr Xa_3	Intensity Female_chr Xi_1	Intensity Female_chr Xi_2	Intensity Female_chr Xi_3	Intensity Female_chr Xi_4	Intensity Pool_1	Intensity Pool_2	Intensity Pool_3	Intensity Male_chr X_1	Intensity Male_chr X_2	Intensity Male_chr X_3	Intensity Male_chr X_4	LFQ Intensity Female_chr Xa_1	LFQ Intensity Female_chr Xa_2	LFQ Intensity Female_chr Xa_3	LFQ Intensity Female_chr Xi_1	LFQ Intensity Female_chr Xi_2	LFQ Intensity Female_chr Xi_3	LFQ Intensity Female_chr Xi_4	LFQ intensity Pool_1	LFQ intensity Pool_2	LFQ intensity Pool_3	LFQ Intensity Male_chr X_1	LFQ Intensity Male_chr X_2	LFQ Intensity Male_chr X_3	LFQ intensity X_male_4
P10853;Q8CGP2;Q8CGP1;P70696	P10853;Q8CGP2;Q8CGP1;P70696	Histone H2B type 1-F/J/L;Histone H2B type 1-P;Histone H2B type 1-K;Histone H2B type 1-A	Hist1h2bf;Hist1h2bp;Hist1h2bk;Hist1h2ba	13.936	2456200000000	127250000000	119130000000	100790000000	100130000000	135970000000	128340000000	85299000000	106060000000	116640000000	90450000000	117220000000	106200000000	111630000000	83073000000	96588000000	129300000000	116900000000	144020000000	85991000000	72027000000	69079000000	92319000000	105300000000	88626000000	163090000000	99976000000	85328000000	78956000000
C0HKE9;C0HKE8;C0HKE7;C0HKE6;C0HKE5;C0HKE4;C0HKE3;C0HKE2;C0HKE1;Q8CGP6;Q8R1M2;Q8CGP7;Q8CGP5;Q8BFU2;Q8CGP4	C0HKE9;C0HKE8;C0HKE7;C0HKE6;C0HKE5;C0HKE4;C0HKE3;C0HKE2;C0HKE1;Q8CGP6;Q8R1M2;Q8CGP7;Q8CGP5;Q8BFU2;Q8CGP4	Histone H2A type 1-H;Histone H2A.J;Histone H2A type 1-K;Histone H2A type 1-F;Histone H2A type 3;Histone H2A	Hist1h2ah;H2afj;Hist1h2ak;Hist1h2af;Hist3h2a;Hist1h2aa	14.135	1032100000000	51429000000	54749000000	36055000000	62236000000	63525000000	53663000000	31824000000	48243000000	45210000000	37798000000	53569000000	41608000000	39028000000	36080000000	54772000000	65567000000	45248000000	86275000000	49760000000	36369000000	31613000000	45170000000	45445000000	40710000000	65062000000	35584000000	35496000000	32091000000
P60710;E9Q3M9	P60710	Actin, cytoplasmic 1;Actin, cytoplasmic 1, N-terminally processed	Actb	41.736	909690000000	43640000000	32859000000	32358000000	26595000000	51121000000	58962000000	32409000000	36879000000	40183000000	33592000000	50562000000	43458000000	46275000000	38694000000	33189000000	34987000000	32113000000	31350000000	33604000000	33969000000	28196000000	33986000000	36442000000	34962000000	63367000000	33835000000	38793000000	37900000000
P62806	P62806	Histone H4	Hist1h4a	11.367	809370000000	34921000000	35166000000	27204000000	34053000000	42487000000	48097000000	32083000000	37464000000	34439000000	32767000000	25386000000	39395000000	34568000000	39095000000	31725000000	28741000000	24271000000	72758000000	26679000000	29857000000	20942000000	25948000000	26369000000	26516000000	22416000000	30951000000	23106000000	25124000000
Q8VDD5;B1AR69;Q91Z83;P13542;Q5SX39;P13541;A2AQP0;Q5SX40	Q8VDD5	Myosin-9	Myh9	226.37	518850000000	33259000000	28130000000	18178000000	6674500000	21440000000	25104000000	10564000000	22057000000	20728000000	20875000000	37236000000	42729000000	36456000000	31233000000	26914000000	27914000000	18705000000	8696900000	13802000000	14910000000	10082000000	19139000000	19909000000	20792000000	46975000000	35589000000	30309000000	29061000000
P84228	P84228	Histone H3.2	Hist1h3b	15.388	334170000000	9689100000	11457000000	12094000000	16342000000	16131000000	22525000000	16757000000	9697500000	12260000000	15502000000	9327100000	17287000000	16611000000	17935000000	7311900000	11918000000	11156000000	40372000000	13368000000	11683000000	11606000000	12135000000	15271000000	15318000000	13640000000	17440000000	13825000000	15395000000
P10126	P10126	Elongation factor 1-alpha 1	Eef1a1	50.113	191670000000	7031400000	5496500000	5718800000	8718600000	12130000000	13848000000	7696900000	8017600000	8147600000	6645100000	3130700000	7722200000	6247800000	6158300000	6240600000	5768900000	6896400000	10287000000	7659800000	9407600000	7632800000	7220400000	7496600000	7234600000	4173000000	5808100000	5776400000	5967400000
P68372;Q9D6F9;A2AQ07	P68372;Q9D6F9	Tubulin beta-4B chain;Tubulin beta-4A chain	Tubb4b;Tubb4a	49.83	182080000000	8504600000	5835900000	6327300000	6813500000	12500000000	14850000000	6948000000	7960000000	6703200000	6286700000	4527800000	6184600000	7261200000	5859900000	6836400000	6178700000	6730600000	7782000000	7796500000	8518800000	6510300000	6038400000	6348700000	6307600000	5377200000	4727700000	5991200000	5185500000
P05213;Q3UX10	P05213	Tubulin alpha-1B chain	Tuba1b	50.151	179480000000	7861100000	5707700000	6394900000	6385900000	11181000000	14451000000	7067100000	8400000000	7346700000	6574000000	4246300000	6533200000	7968800000	5592800000	7227200000	6459500000	7553400000	8653300000	7806900000	9890000000	7264700000	7174200000	7074900000	6973500000	5611300000	5651100000	7114000000	5931500000
P09405	P09405	Nucleolin	Ncl	76.722	146410000000	5844200000	5500300000	10399000000	4469400000	9206600000	13212000000	6379600000	5651800000	6342600000	6028400000	4992900000	4682400000	5128600000	3840900000	5345900000	7036800000	13631000000	5747500000	6407700000	9094600000	5836800000	5769400000	6394800000	6310400000	7060200000	4334400000	5202900000	3889700000
Q9ERK4	Q9ERK4	Exportin-2	Cse1l	110.45	138700000000	12331000	19827000000	33413000	36373000	129990000	106160000	17103000000	88590000	110560000	18930000000	15369000000	49072000	122120000	35762000	347490000	39816000000	1514500000	3204800000	4659400000	3044600000	7063200000	3456800000	4227400000	6628000000	6797100000	2151500000	4033400000	1671200000
E9PVX6	E9PVX6		Mki67	350.86	124670000000	4665700000	4931600000	3779200000	4216200000	5723200000	5902300000	4666500000	5741800000	5249400000	4712400000	3023700000	10311000000	8127100000	8396200000	4494300000	5854200000	4721600000	5349500000	4205800000	4007400000	4757700000	5202600000	5275700000	5120300000	4278800000	8743300000	7197600000	8089400000
Q3UV17	Q3UV17	Keratin, type II cytoskeletal 2 oral	Krt76	62.844	121040000000	8090100000	7185600000	3012200000	3398100000	7280700000	4754100000	4703900000	7252500000	5674700000	2973900000	1513600000	2628500000	2337800000	1633300000	7850900000	8952000000	3991400000	4614000000	4721200000	3437200000	5634100000	6518700000	5075900000	4238800000	2131600000	2442500000	2186900000	1707100000
P43275	P43275	Histone H1.1	Hist1h1a	21.785	109090000000	4101300000	5181700000	4442100000	5531600000	7035300000	7509500000	3407100000	5625900000	6720500000	4498700000	2543000000	4724200000	4346700000	4857400000	3136700000	5926400000	5381700000	9915400000	5363700000	4882800000	3236900000	4457200000	5053200000	5097900000	3541400000	5102100000	4098200000	5580400000
P16858;A0A1D5RLD8;Q64467	P16858;A0A1D5RLD8	Glyceraldehyde-3-phosphate dehydrogenase	Gapdh	35.81	105540000000	4062400000	2704600000	3210100000	5657000000	5924900000	7127200000	5181400000	4601700000	4142200000	3780700000	1899700000	4179500000	4287600000	4493000000	3101700000	2788600000	3525500000	6741100000	3870500000	4386800000	4965600000	3647000000	3823200000	3817700000	2216900000	3587600000	3591300000	3781100000
P15864	P15864	Histone H1.2	Hist1h1c	21.266	104410000000	2378800000	4724900000	5108400000	3328300000	7146600000	7933400000	3787700000	3173900000	4481100000	4640300000	2765500000	5573400000	4687400000	6303700000	2341200000	4825800000	6538100000	5201400000	4659400000	5690300000	3335500000	4060100000	4298500000	5699200000	4103600000	5923700000	4940400000	6627200000
P11499;REV__Q8BL66	P11499	Heat shock protein HSP 90-beta	Hsp90ab1	83.28	100130000000	2537500000	2010500000	2865400000	2743300000	6712100000	5402500000	4339900000	4080000000	4370700000	3873000000	2170900000	4322800000	4825900000	4124500000	2380500000	2864600000	3613400000	3622400000	4914100000	3672100000	4213900000	4025000000	4339300000	4183200000	3030400000	3844700000	4307700000	4126800000
P63017;P17156;P16627	P63017	Heat shock cognate 71 kDa protein	Hspa8	70.87	98101000000	2684400000	2278100000	3153500000	2644200000	5821700000	4878200000	4659700000	4329400000	4211100000	4339300000	2666400000	4535100000	4900700000	4942000000	2668400000	2827500000	3913100000	3271800000	4171100000	3290100000	4549800000	4132500000	4109200000	4304900000	3799900000	4149600000	4368200000	4685000000
O54962	O54962	Barrier-to-autointegration factor;Barrier-to-autointegration factor, N-terminally processed	Banf1	10.102	96743000000	5546700000	4796200000	1979300000	3481500000	4861300000	4364100000	3564400000	3954400000	4324300000	3844600000	5947600000	4882200000	4118800000	5490400000	5388700000	5552300000	2113000000	5194500000	3581300000	3015500000	3478600000	3989200000	3938400000	3972700000	7938000000	4783400000	3865700000	5348200000
Q60605;Q8CI43	Q60605	Myosin light polypeptide 6	Myl6	16.93	89131000000	4570100000	4023100000	2859900000	1389400000	2764000000	3372000000	1608900000	4004300000	3695400000	3437400000	8653700000	6995600000	6124900000	7747300000	4137100000	4180900000	3350000000	1598900000	1902900000	2262400000	1486400000	3663700000	3298900000	3450700000	10479000000	5956900000	5553000000	6810100000
P99024	P99024	Tubulin beta-5 chain	Tubb5	49.67	86848000000	3342000000	3106900000	3454400000	3422800000	5949400000	7287900000	3293800000	3806600000	3292300000	3294100000	1489200000	2791400000	3592800000	2570300000	4088100000	3549700000	4035400000	4087400000	3968100000	4553900000	3080500000	3382300000	2881900000	3208700000	2598800000	2272400000	2936300000	2543900000
Q9QZQ8	Q9QZQ8	Core histone macro-H2A.1	H2afy	39.735	78616000000	1995100000	2152000000	1626900000	6465600000	5550900000	8170000000	5379400000	2914200000	3237400000	2591300000	744510000	2342200000	1841400000	2000900000	2019300000	2675200000	1843000000	8952800000	4572100000	5216500000	5272700000	3105700000	3433200000	3051700000	1065000000	2167400000	1725800000	2042700000
Q01320	Q01320	DNA topoisomerase 2-alpha	Top2a	172.79	78527000000	3840000000	1061200000	1534100000	2107900000	2417200000	3503100000	3122300000	3175500000	2891200000	2729600000	1821200000	9413200000	5488700000	5170700000	3262100000	1408300000	2171500000	2644100000	1772800000	2542700000	3419400000	3117000000	3296900000	3378300000	2720300000	7286100000	4944900000	5595100000
P27661	P27661	Histone H2AX	H2afx	15.142	75737000000	2710800000	3804000000	1361900000	91784000	5600000000	6321200000	2657700000	2721200000	1515700000	2525000000	2997900000	2270300000	4940800000	3516300000	3122000000	4827700000	2083500000	216220000	3874800000	3685000000	2281900000	2487000000	1791200000	3003400000	4715900000	2265900000	4204500000	3198800000
P20152;P31001;P15331;P08553	P20152	Vimentin	Vim	53.687	73952000000	3759400000	3898500000	2292800000	1125400000	3429700000	3704400000	1217200000	3475400000	3404000000	2477500000	9020500000	5667400000	4474900000	4048100000	3307900000	4189700000	3107800000	1632400000	2345000000	2563200000	1570400000	3003800000	3039200000	2929000000	11071000000	4753500000	4061300000	3999900000
Q7TN89	Q7TN89	GTPase ERas	Eras	24.32	71276000000	3410300000	3299500000	12997000	6410800000	4478300000	4020700000	3696500000	4415800000	4253100000	3780700000	1617600000	82936000	4462500000	3103000000	3670400000	4536100000	8768400	9307800000	3573200000	3137200000	4122000000	1625100000	4703400000	4579500000	2386600000	36320000	4517700000	3389300000
P43276	P43276	Histone H1.5	Hist1h1b	22.576	62935000000	2832700000	2689400000	2828000000	3280300000	3364000000	3887900000	2152900000	2771500000	2405300000	2444400000	2252700000	2870900000	2975200000	3168400000	2595600000	3508600000	3412800000	4125000000	2700400000	2674400000	1896800000	2724600000	2678400000	2437200000	2786600000	2871400000	2960800000	3016000000
Q3THE2	Q3THE2	Myosin regulatory light chain 12B	Myl12b	19.779	59710000000	4160400000	3197300000	1706900000	738360000	2449800000	2959000000	1169300000	2737400000	2353200000	2201200000	4954100000	4423300000	4318500000	4258100000	3042600000	3003200000	1840100000	1007500000	1437800000	1536300000	1047500000	2108700000	2171700000	2148500000	5849000000	2935600000	3188800000	3475800000
P68134;P68033;P63268;P62737	P68134;P68033;P63268;P62737	Actin, alpha skeletal muscle;Actin, alpha cardiac muscle 1;Actin, gamma-enteric smooth muscle;Actin, aortic smooth muscle	Acta1;Actc1;Actg2;Acta2	42.051	58761000000	4032100000	2145600000	1735500000	1578000000	3671800000	4306700000	1530700000	2461200000	2056900000	1718700000	2996000000	2757500000	2489900000	2260800000	2441600000	1737700000	1822600000	1336900000	2004500000	1912000000	873250000	1482300000	1730700000	1637900000	2475100000	1739200000	1740400000	1830800000
Q64511	Q64511	DNA topoisomerase 2-beta	Top2b	181.91	57865000000	2966000000	957440000	1782900000	1357800000	1691200000	3546000000	2548600000	2423600000	2338200000	2382700000	1700300000	5601400000	4119600000	4071600000	2781600000	1347300000	2302000000	1790000000	1138800000	2463700000	2466100000	2350700000	2332300000	2356500000	2308100000	4664400000	3286500000	3904100000
Q3THW5;P0C0S6	Q3THW5;P0C0S6	Histone H2A.V;Histone H2A.Z	H2afv;H2afz	13.509	55435000000	4473400000	3313600000	1557700000	2240700000	2000100000	2381000000	1680300000	3050700000	1825000000	2492200000	1968000000	2054100000	1673800000	1866000000	4371300000	3947000000	2131500000	2932900000	1501500000	1578700000	2124600000	2750400000	1821300000	2746800000	3140800000	1964700000	1409600000	1800900000
O08573	O08573	Galectin-9	Lgals9	40.035	54460000000	5105600000	2657000000	1583500000	1172100000	2060900000	4985500000	1800000000	2485100000	2069300000	2010100000	2114800000	3138500000	2383300000	2748600000	4201400000	2883500000	2257500000	1553700000	1714200000	3253800000	1693600000	2082700000	2184900000	2203700000	2477300000	2549800000	2114300000	2583600000
P29341;Q9D4E6;A2A5N3;Q8C7D3	P29341	Polyadenylate-binding protein 1	Pabpc1	70.67	48494000000	3108300000	1712400000	1416700000	1219700000	2842800000	2486800000	1544600000	2153400000	2070800000	1921700000	2367500000	2734800000	2576200000	1964600000	2555700000	2245200000	1762500000	1514500000	1876500000	1756800000	1444400000	1975100000	2038300000	2097100000	3068100000	2230100000	2256300000	1901300000
Q8VEK3	Q8VEK3	Heterogeneous nuclear ribonucleoprotein U	Hnrnpu	87.917	45111000000	1682800000	1146300000	1721300000	1849700000	3084100000	4755500000	1663800000	1900900000	1729000000	1430500000	789460000	1905700000	1627100000	1215700000	1751400000	1411500000	2263600000	2145400000	2112100000	2995000000	1789600000	1736500000	1789700000	1666200000	1138800000	1580100000	1474000000	1360200000
Q920B9	Q920B9	FACT complex subunit SPT16	Supt16h	119.82	44606000000	3171200000	562110000	1158100000	640550000	1123400000	2130700000	936500000	2054800000	1863800000	1618100000	3830300000	5220300000	4255200000	3771200000	2943400000	803320000	1387000000	978940000	811650000	1465200000	960220000	1825600000	1760100000	1726500000	4925000000	4228700000	3561000000	3417500000
P63325	P63325	40S ribosomal protein S10	Rps10	18.916	41921000000	2671000000	2003800000	1421200000	926140000	1867700000	2385500000	1458700000	1686600000	1909900000	2479400000	2004700000	2517700000	1691100000	1963900000	1988000000	1987700000	1701900000	1465600000	2032000000	1630000000	1324500000	1550500000	1809200000	1962900000	2505600000	2491900000	2109200000	2524000000
Q9Z2X1	Q9Z2X1	Heterogeneous nuclear ribonucleoprotein F;Heterogeneous nuclear ribonucleoprotein F, N-terminally processed	Hnrnpf	45.729	40198000000	2073200000	1275800000	1808900000	1538700000	2599100000	3284300000	1743900000	1518500000	1738100000	1613200000	892600000	1358000000	1421900000	1184100000	1821800000	1449200000	2264200000	1943900000	1778200000	2202900000	1935400000	1486800000	1754400000	1716200000	1289000000	1145600000	1275600000	1199300000
Q61656	Q61656	Probable ATP-dependent RNA helicase DDX5	Ddx5	69.289	36197000000	1425700000	1136300000	1273600000	875860000	2361200000	3107400000	1489800000	1520700000	1510100000	1354200000	860130000	1846500000	1867800000	1364700000	1400500000	1319200000	1595700000	1213900000	1619500000	1944700000	1534900000	1445100000	1449500000	1453600000	1144600000	1514700000	1710200000	1390700000
Q9D0E1;Q91VC4	Q9D0E1	Heterogeneous nuclear ribonucleoprotein M	Hnrnpm	77.648	34928000000	1689900000	1164000000	1644400000	1226000000	2361400000	3290800000	1842600000	1481100000	1464600000	1532700000	586480000	1067300000	1155100000	901390000	1280100000	1241300000	1709900000	1630000000	1501200000	1642900000	1766400000	1254100000	1415600000	1395200000	846340000	912590000	929610000	876230000
P17182;P17183	P17182	Alpha-enolase	Eno1	47.14	34829000000	748090000	905310000	1118100000	737990000	1606800000	1667000000	2230200000	1520200000	1527000000	1265500000	1301500000	1906500000	1816900000	2465100000	762630000	1122900000	1324800000	1106700000	1131000000	1182100000	2265900000	1497100000	1374000000	1430300000	1748800000	1682600000	1643600000	2289700000
P62270;F6YVP7;A0A1Y7VKY1	P62270;F6YVP7;A0A1Y7VKY1	40S ribosomal protein S18	Rps18;Gm10260	17.718	34610000000	1547600000	1285000000	1163100000	1186600000	2412700000	2130000000	1838700000	1332200000	1362700000	1693000000	887980000	1132500000	1283500000	1202100000	1537100000	1708400000	1557000000	1602600000	1836000000	1546200000	1633000000	1350700000	1460300000	1642900000	1223900000	1116500000	1251600000	1154100000
P97351	P97351	40S ribosomal protein S3a	Rps3a	29.885	34068000000	1577100000	1074200000	1214600000	1150600000	2383200000	3050500000	1488600000	1236500000	1372700000	1157200000	980790000	1083500000	1363300000	889420000	1659500000	1428400000	1467100000	1644800000	1553800000	1879400000	1274800000	1179700000	1282700000	1158100000	1417200000	937150000	1055100000	782370000
Q61937	Q61937	Nucleophosmin	Npm1	32.56	30419000000	1424500000	1078600000	1862500000	762590000	1838300000	2920300000	1766000000	1403000000	1244700000	1493300000	1022800000	980280000	1230300000	988680000	1237700000	1365500000	2249800000	826650000	1281300000	1726000000	1567700000	1173100000	1321000000	1306000000	1330600000	883650000	1097900000	900690000
D3Z2H9	D3Z2H9		Tpm3-rs7	28.991	29952000000	1745300000	1312100000	1045800000	453300000	1273800000	1206500000	742750000	1211100000	1270400000	1194900000	2665300000	1974700000	2031000000	2243200000	1883000000	1639700000	1207400000	589050000	926510000	894100000	752310000	1353300000	1306400000	1292500000	3542200000	1736300000	1656100000	2034200000
Q9CPR4;B2RY53	Q9CPR4	60S ribosomal protein L17	Rpl17	21.423	29187000000	1452300000	1149700000	1361900000	910630000	1898200000	2471700000	1010600000	1298300000	1182500000	1124300000	971440000	1054700000	1133200000	953910000	1313400000	1297700000	1468800000	1092700000	1203600000	1415500000	989980000	1205600000	1127300000	1110500000	1303500000	832500000	997960000	820470000
Q8CAQ8	Q8CAQ8	MICOS complex subunit Mic60	Immt	83.899	28770000000	1804800000	1027400000	1275900000	696570000	1278400000	1864900000	1068000000	1247300000	1069100000	1153300000	533170000	1445800000	1937300000	1667800000	1690700000	1225100000	1408300000	869610000	993530000	1175200000	1028200000	1263500000	1172900000	1165800000	826860000	1379800000	1777000000	1536200000
Q8VDF2;Q7TMI3	Q8VDF2	E3 ubiquitin-protein ligase UHRF1	Uhrf1	88.303	28641000000	1840300000	754980000	869990000	585150000	1280000000	1368500000	1450800000	1321300000	1242300000	1062500000	294590000	1731200000	1332700000	1110300000	1616400000	959620000	1140300000	796310000	1006200000	984420000	1556400000	1216600000	1234200000	1260300000	475850000	1517500000	1241400000	1139000000
P60843;P10630	P60843;P10630	Eukaryotic initiation factor 4A-I;Eukaryotic initiation factor 4A-II;Eukaryotic initiation factor 4A-II, N-terminally processed	Eif4a1;Eif4a2	46.153	28513000000	975030000	663810000	719450000	1482100000	2152000000	2101000000	1507300000	1276300000	1277100000	1009000000	202880000	814140000	905290000	742000000	736490000	646330000	848910000	1530400000	1148400000	1090400000	1426100000	1009200000	1020300000	951150000	269510000	562150000	724070000	639490000
P61979	P61979	Heterogeneous nuclear ribonucleoprotein K	Hnrnpk	50.976	28354000000	1277000000	1030200000	1357200000	766310000	1524200000	2398300000	1411000000	1301400000	846110000	914480000	672520000	1216400000	1246700000	1111100000	1182400000	1081300000	1510400000	1142300000	1198500000	1394400000	1312200000	1148600000	1164600000	1226800000	1121700000	979990000	1326800000	1199100000
P62702	P62702	40S ribosomal protein S4, X isoform	Rps4x	29.597	28353000000	1331300000	790350000	957680000	1333100000	1974900000	2032000000	1174900000	1523100000	1260000000	1188500000	685570000	1193300000	949830000	813360000	1075600000	1052800000	1196400000	1732500000	1302600000	1309700000	1209300000	1197000000	1155700000	1197800000	909680000	915360000	900620000	885180000
P09242	P09242	Alkaline phosphatase, tissue-nonspecific isozyme	Alpl	57.514	26570000000	2282600000	1861700000	869750000	401880000	1129500000	1441300000	603320000	1096700000	1087000000	919610000	1691000000	1545400000	1553500000	1545400000	1927100000	1848900000	953730000	490250000	680510000	853250000	618200000	996630000	1052000000	1024000000	2080000000	1200000000	1397800000	1343900000
P18760;P45591	P18760	Cofilin-1	Cfl1	18.559	25926000000	592740000	623270000	913750000	583420000	1671600000	1646800000	998520000	1085300000	948110000	1259900000	863950000	1138900000	1055400000	1357100000	647140000	705820000	1099200000	862900000	1221700000	1126200000	1213200000	1058500000	1053100000	1233600000	1255000000	1043200000	1069400000	1325700000
P52480;P53657	P52480	Pyruvate kinase PKM	Pkm	57.844	25680000000	452190000	595230000	877640000	477720000	1167800000	1617900000	1218500000	1228600000	1077500000	986890000	706940000	1525600000	1388100000	1468500000	409670000	711500000	1031600000	747530000	908710000	1081300000	1278300000	1112100000	1117200000	1125300000	968420000	1277000000	1177500000	1521500000
Q08943	Q08943	FACT complex subunit SSRP1	Ssrp1	80.859	25015000000	2017800000	542530000	805380000	527340000	846570000	1379400000	528440000	1061000000	919550000	843220000	2336800000	1959800000	2022400000	1562100000	1720900000	671340000	987100000	752940000	631700000	990390000	600830000	979900000	943050000	993200000	2716700000	1736700000	1660500000	1467800000
P14131	P14131	40S ribosomal protein S16	Rps16	16.445	24820000000	460550000	987830000	1047200000	1083500000	1633600000	1525600000	1085700000	625730000	1342000000	1116200000	605650000	376130000	1013600000	1036100000	749800000	722720000	879420000	1474500000	1440200000	1219600000	1007700000	770380000	1073500000	1048600000	704650000	794790000	722850000	780580000
Q6PDM2	Q6PDM2	Serine/arginine-rich splicing factor 1	Srsf1	27.744	23491000000	1469400000	1191200000	991500000	543350000	1161600000	1763700000	873990000	1079700000	984530000	814380000	1351300000	1186300000	1434600000	1037200000	1342300000	1416200000	1308700000	724890000	856810000	1185700000	875710000	975050000	994180000	1006900000	1815900000	1059400000	1200200000	1028300000
P17742	P17742	Peptidyl-prolyl cis-trans isomerase A;Peptidyl-prolyl cis-trans isomerase A, N-terminally processed	Ppia	17.971	23387000000	679810000	642810000	752470000	536350000	1378900000	1404000000	1319800000	1079000000	996660000	968000000	824660000	1280200000	1101600000	1359000000	609500000	686110000	859970000	750980000	845050000	808120000	1045600000	913070000	834750000	894190000	1207900000	1025200000	943400000	1222600000
P14869	P14869	60S acidic ribosomal protein P0	Rplp0	34.216	23341000000	1115800000	790850000	883330000	797970000	1399500000	1787500000	890140000	1058100000	940400000	890760000	875100000	975740000	1224000000	798140000	1180800000	972220000	1148100000	1064000000	1016300000	1226200000	997870000	901160000	954620000	966700000	1158200000	829060000	1095000000	793850000
P00520;Q4JIM5	P00520	Tyrosine-protein kinase ABL1	Abl1	122.67	22978000000	1243100000	675730000	842020000	497160000	1098400000	2118800000	726440000	1074200000	908220000	839490000	941920000	2025400000	1439000000	1731300000	1081200000	777270000	1103800000	629740000	700610000	1227000000	693120000	911150000	898840000	918570000	1324200000	1693000000	1196200000	1479000000
P62983;A0A0A6YW67;P0CG49;P0CG50	P62983;A0A0A6YW67;P0CG49;P0CG50	Ubiquitin-40S ribosomal protein S27a;Ubiquitin;40S ribosomal protein S27a;Polyubiquitin-B;Ubiquitin;Polyubiquitin-C;Ubiquitin;Ubiquitin-related 1;Ubiquitin-related 2	Rps27a;Gm8797;Ubb;Ubc	17.951	22607000000	705040000	861940000	774870000	1250400000	1644600000	1453800000	948580000	881500000	893360000	878460000	622720000	786260000	717950000	704630000	700910000	1205900000	979100000	1453900000	1106400000	993910000	1019000000	874490000	933230000	966480000	776480000	685010000	674070000	718780000
P58252	P58252	Elongation factor 2	Eef2	95.313	22235000000	428840000	516470000	401430000	705450000	1393100000	1482900000	863790000	973640000	759070000	644060000	221790000	887530000	860690000	1013900000	505160000	566020000	663540000	785040000	1071700000	914090000	1010300000	871590000	820880000	904300000	496970000	756140000	748230000	874790000
Q8BG05	Q8BG05	Heterogeneous nuclear ribonucleoprotein A3	Hnrnpa3	39.652	21959000000	1181200000	754180000	822880000	637250000	1319900000	1681700000	682300000	899120000	925210000	757400000	731840000	1170400000	1339200000	997610000	964570000	873460000	896670000	745720000	874330000	1052100000	661290000	794510000	869370000	830070000	1013600000	1076200000	1235300000	987310000
P62830	P62830	60S ribosomal protein L23	Rpl23	14.865	21038000000	1087900000	678360000	708200000	541290000	1178300000	1480600000	1385600000	955960000	755600000	1151000000	444210000	800520000	804140000	986590000	1059500000	858010000	878780000	763140000	918940000	1051100000	1102900000	867310000	817020000	887740000	743160000	812040000	776830000	839840000
O88569	O88569	Heterogeneous nuclear ribonucleoproteins A2/B1	Hnrnpa2b1	37.402	20915000000	986540000	669060000	751170000	671400000	1331900000	1459900000	722940000	1047400000	926210000	681780000	627130000	991180000	1222400000	981080000	931050000	839840000	909550000	871260000	967640000	959750000	791490000	1000700000	865960000	845570000	857470000	969500000	1188000000	1056000000
P25444	P25444	40S ribosomal protein S2	Rps2	31.231	20765000000	1156900000	708720000	529280000	755240000	1379000000	1692200000	961960000	820230000	750540000	569280000	344720000	1064600000	687660000	535910000	1017600000	718910000	729210000	1060600000	994190000	1150400000	780620000	976760000	868030000	727710000	633050000	717290000	676610000	616150000
P27659;E9PWZ3	P27659	60S ribosomal protein L3	Rpl3	46.109	20456000000	653160000	461210000	624880000	1002700000	1616800000	1775100000	889730000	700720000	899910000	849620000	270620000	627810000	611230000	604360000	529140000	530780000	727720000	1378000000	993200000	1043700000	790460000	653450000	877320000	780100000	373420000	541030000	548720000	537380000
O89053	O89053	Coronin-1A	Coro1a	50.989	20063000000	696700000	380540000	720680000	447960000	1183800000	1497600000	729810000	822490000	723500000	720880000	792250000	1074000000	815560000	1044000000	643180000	562850000	898200000	703180000	838600000	989320000	820070000	871720000	778590000	834860000	1009600000	890000000	767340000	1074700000
P84089	P84089	Enhancer of rudimentary homolog	Erh	12.259	19984000000	1163000000	915530000	950220000	390270000	962220000	1561100000	1021900000	925210000	775440000	814650000	837160000	1066000000	1211000000	972900000	878220000	1002700000	865140000	443440000	585400000	815460000	893050000	635460000	697950000	689990000	966350000	790370000	850170000	860380000
P14733	P14733	Lamin-B1	Lmnb1	66.785	19856000000	1067600000	895140000	1189200000	766340000	1087200000	1290100000	825890000	768970000	867220000	785920000	522420000	679340000	719760000	698140000	860080000	965430000	1151400000	889140000	704240000	900160000	876970000	683900000	811200000	773010000	640710000	747890000	746960000	847120000
Q8VE37	Q8VE37	Regulator of chromosome condensation	Rcc1	44.93	19745000000	1112800000	633090000	412540000	478260000	953320000	957810000	1106900000	708090000	799550000	713980000	441760000	1306000000	1026900000	995230000	970850000	709370000	496340000	677880000	611420000	559750000	1084200000	649220000	775030000	712960000	622490000	1012800000	849460000	832680000
Q9CX86	Q9CX86	Heterogeneous nuclear ribonucleoprotein A0	Hnrnpa0	30.53	19363000000	1023600000	769220000	683950000	583450000	1122900000	1834900000	831880000	848510000	796500000	688820000	539700000	832140000	972090000	717700000	938760000	866660000	742250000	910140000	812560000	1042300000	716570000	792300000	725050000	743110000	882090000	687190000	793890000	656000000
P49312	P49312	Heterogeneous nuclear ribonucleoprotein A1;Heterogeneous nuclear ribonucleoprotein A1, N-terminally processed	Hnrnpa1	34.196	19292000000	880350000	728930000	568740000	514510000	1493200000	1198200000	880730000	748800000	882010000	775160000	469340000	995960000	829740000	696740000	894040000	756750000	784340000	671680000	917640000	805930000	703300000	757570000	753670000	720000000	752770000	766420000	913730000	717100000
Q8CG48	Q8CG48	Structural maintenance of chromosomes protein 2	Smc2	134.24	19279000000	837940000	614020000	702960000	817280000	1167700000	1099200000	589020000	906030000	778630000	922840000	553910000	789970000	729360000	666300000	805700000	820990000	861420000	1061900000	833170000	795460000	675520000	821330000	815550000	839780000	746940000	763730000	726680000	689810000
Q7TMK9	Q7TMK9	Heterogeneous nuclear ribonucleoprotein Q	Syncrip	69.632	19225000000	965870000	685970000	671150000	536440000	1282000000	1445500000	670700000	856260000	860880000	667680000	574310000	811960000	827180000	624970000	900260000	818320000	913140000	714210000	904630000	932050000	728970000	843810000	814980000	800250000	748300000	752000000	804280000	743280000
P62264	P62264	40S ribosomal protein S14	Rps14	16.273	19099000000	949480000	666750000	692120000	549460000	1374900000	1562200000	849240000	687660000	778570000	839160000	721140000	896660000	879870000	758840000	830630000	746800000	717660000	612660000	854840000	797180000	707340000	551980000	682270000	732610000	854900000	614030000	627020000	611250000
Q9Z204;Q8BTF8	Q9Z204	Heterogeneous nuclear ribonucleoproteins C1/C2	Hnrnpc	34.384	18788000000	958390000	782040000	791770000	672230000	1207800000	1373800000	788640000	825190000	835560000	739320000	622130000	725230000	697930000	634620000	800580000	855560000	921990000	793620000	764800000	837400000	790610000	692060000	754930000	775570000	758050000	550620000	617580000	580870000
Q792Z1;Q792Y9;Q792Z0;Q792Y8	Q792Z1		Try10	26.221	18730000000	1273400000	864200000	797820000	620470000	800630000	933050000	643300000	822820000	775150000	690040000	952840000	989730000	839620000	739670000	744610000	559440000	646530000	518050000	311340000	364710000	515540000	425000000	493520000	450640000	788650000	452540000	458800000	456760000
P62082	P62082	40S ribosomal protein S7	Rps7	22.127	18685000000	863070000	690070000	746100000	639560000	1039300000	1265400000	784380000	792780000	701200000	743380000	616640000	806810000	640760000	656760000	1002800000	881540000	997050000	1005500000	678620000	871840000	709850000	793350000	701910000	741500000	989480000	680450000	572410000	618580000
Q9CZX8	Q9CZX8	40S ribosomal protein S19	Rps19	16.085	18514000000	1097200000	770840000	992240000	433380000	1200400000	1475600000	611760000	831810000	689340000	752580000	765250000	626630000	833670000	730600000	1072300000	1023500000	1090700000	622310000	859940000	1060100000	662070000	774060000	718410000	769900000	1137600000	705070000	815980000	702380000
P35979	P35979	60S ribosomal protein L12	Rpl12	17.804	18481000000	1003200000	711010000	748080000	530510000	1256000000	1631600000	712080000	796010000	775410000	692000000	711880000	671220000	823280000	522110000	983390000	883740000	1101700000	710350000	915980000	1180700000	703730000	743750000	784910000	765670000	1008800000	609430000	762590000	500240000
Q9CXW4	Q9CXW4	60S ribosomal protein L11	Rpl11	20.252	18366000000	738140000	583010000	665280000	496570000	1196800000	1499500000	753950000	724900000	749860000	729200000	552630000	679020000	874410000	687620000	795540000	685310000	755370000	801880000	906850000	1062800000	860040000	719740000	766230000	791800000	833710000	622550000	762880000	727450000
P20029	P20029	78 kDa glucose-regulated protein	Hspa5	72.421	18308000000	608310000	562860000	482830000	404370000	658360000	642710000	975800000	762060000	718610000	638510000	858060000	1259100000	1604400000	1287000000	552190000	662550000	591680000	525750000	514800000	430090000	1010300000	757300000	784840000	759070000	1113400000	1112500000	1318800000	1238600000
P09541	P09541	Myosin light chain 4	Myl4	21.159	18070000000	1865700000	1195200000	945970000	684500000	1571500000	1358300000	427320000	766640000	768330000	512660000	29221000	19452000	26571000	34565000	1794000000	1445200000	1162300000	787860000	1049700000	815070000	560530000	684110000	785080000	722610000	46118000	13482000	34141000	72983000
P51881	P51881	ADP/ATP translocase 2;ADP/ATP translocase 2, N-terminally processed	Slc25a5	32.931	17951000000	581200000	536910000	446080000	1139000000	1298800000	1409600000	549260000	693330000	694950000	537180000	441430000	561580000	769840000	570040000	542590000	704020000	590810000	1364100000	931050000	935100000	612300000	628510000	695070000	586630000	615780000	530090000	721320000	533230000
P63276	P63276	40S ribosomal protein S17	Rps17	15.524	17944000000	1027100000	726820000	792140000	788080000	1297100000	1084000000	583390000	676260000	740360000	765890000	713860000	570380000	716870000	434600000	938800000	919690000	950320000	796650000	855600000	649820000	573370000	656700000	746990000	769480000	1016600000	517770000	640050000	515700000
P62852	P62852	40S ribosomal protein S25	Rps25	13.742	17613000000	1153000000	1094600000	817430000	664840000	1052700000	1058000000	670250000	694400000	754310000	701800000	820600000	585090000	541030000	635720000	1083300000	1364300000	1078000000	835270000	829430000	801180000	713850000	690550000	812660000	789370000	1110400000	555200000	527800000	656470000
P62900	P62900	60S ribosomal protein L31	Rpl31	14.463	17591000000	906250000	753980000	925900000	594360000	1269000000	1404100000	690460000	636790000	803970000	725890000	687930000	429580000	723620000	386640000	923840000	976510000	1200900000	781730000	970820000	988760000	740580000	655400000	837090000	757640000	905930000	541820000	642180000	450730000
P11031	P11031	Activated RNA polymerase II transcriptional coactivator p15	Sub1	14.427	17481000000	1035800000	640500000	1187900000	338170000	660800000	1733500000	428250000	783620000	719570000	595460000	604270000	1358500000	1187300000	1214600000	782460000	748370000	1272200000	360720000	403600000	912370000	500740000	676710000	649780000	669500000	735430000	1048000000	958740000	1152400000
Q8R081	Q8R081	Heterogeneous nuclear ribonucleoprotein L	Hnrnpl	63.963	17448000000	808610000	491890000	621180000	757790000	1061100000	1501700000	736340000	842390000	650320000	593260000	439280000	721370000	828040000	656520000	714190000	637520000	738360000	893950000	733220000	879000000	740360000	715480000	666900000	654070000	536710000	595750000	692460000	617420000
Q68FD5	Q68FD5	Clathrin heavy chain 1	Cltc	191.55	17099000000	656130000	593310000	640350000	558830000	1145800000	1758200000	871680000	791380000	718470000	669100000	213620000	643550000	771140000	589040000	699420000	735090000	816810000	824750000	778760000	1077400000	827740000	762160000	731900000	712830000	412110000	584120000	683010000	600020000
P17918	P17918	Proliferating cell nuclear antigen	Pcna	28.785	17014000000	520410000	364540000	597140000	447170000	1017200000	1075000000	792890000	781190000	640470000	662770000	581430000	825460000	939770000	953670000	444680000	403700000	655870000	539700000	670070000	629750000	755540000	636990000	626170000	661330000	710000000	637200000	752570000	803110000
P0DP28;P0DP27;P0DP26;P20801	P0DP28;P0DP27;P0DP26			16.837	17000000000	954620000	550560000	643020000	213470000	618420000	754600000	394020000	743060000	758360000	795340000	1782200000	1318800000	1301400000	1427500000	978800000	935890000	709940000	261440000	436030000	462350000	389860000	741050000	767020000	764650000	2409500000	1141800000	1239800000	1322500000
P99027;A0A5F8MPY2	P99027;A0A5F8MPY2	60S acidic ribosomal protein P2	Rplp2	11.651	16984000000	991630000	628450000	861430000	593680000	1010300000	1081600000	710090000	830000000	762790000	616250000	536200000	563250000	574160000	451680000	878360000	761160000	1175900000	715150000	674940000	741000000	795160000	702990000	737090000	728950000	667990000	467700000	512300000	494510000
P62908	P62908	40S ribosomal protein S3	Rps3	26.674	16711000000	486240000	335590000	459120000	515660000	1109000000	1081100000	775700000	748380000	649790000	648640000	252880000	668450000	625300000	578550000	431730000	432050000	520820000	677440000	748420000	653570000	659610000	656870000	644150000	619880000	336080000	511320000	523590000	505570000
P09411;P09041	P09411	Phosphoglycerate kinase 1	Pgk1	44.55	16506000000	202380000	322410000	555200000	402830000	753260000	911650000	1066900000	802450000	705740000	543600000	406220000	1014200000	876930000	922050000	214230000	359200000	629930000	497520000	488270000	650730000	1010900000	620140000	693970000	639270000	595840000	789160000	725860000	927780000
Q7TPV4	Q7TPV4	Myb-binding protein 1A	Mybbp1a	152.04	16499000000	577670000	524740000	517340000	725690000	1125700000	1307000000	913410000	670640000	704610000	605050000	256530000	619800000	494740000	533790000	641540000	593820000	605950000	981990000	819040000	874990000	905450000	673230000	654950000	687500000	493630000	519410000	477470000	509970000
Q60973	Q60973	Histone-binding protein RBBP7	Rbbp7	47.789	16287000000	864450000	457250000	548280000	443880000	715950000	811230000	613390000	711200000	715880000	569880000	809540000	1075700000	1023600000	932780000	875530000	596000000	638550000	603720000	513950000	541450000	563450000	707880000	676660000	601140000	1074900000	997330000	899160000	928260000
P62751	P62751	60S ribosomal protein L23a	Rpl23a	17.695	16124000000	672320000	805870000	813260000	710680000	978130000	1248600000	753870000	617320000	725290000	695410000	357040000	555990000	484310000	679570000	696980000	1001700000	1089500000	879220000	717410000	901570000	762070000	581740000	732640000	773550000	471220000	488890000	465580000	700720000
P25206	P25206	DNA replication licensing factor MCM3	Mcm3	91.545	15644000000	627630000	527870000	606380000	702390000	1173200000	1134000000	758360000	687080000	671780000	606700000	159750000	348450000	350690000	312990000	641270000	617050000	706410000	848060000	730870000	754120000	775130000	639070000	637680000	655620000	311770000	353690000	368320000	382010000
Q91ZW3;Q6PGB8	Q91ZW3	SWI/SNF-related matrix-associated actin-dependent regulator of chromatin subfamily A member 5	Smarca5	121.63	15586000000	699800000	482910000	407670000	448720000	591320000	783820000	598030000	707260000	636760000	579430000	298000000	1320900000	969140000	995290000	624750000	592640000	560490000	615770000	434580000	553270000	648530000	630050000	661970000	638470000	435590000	1047100000	818290000	937730000
Q9Z277	Q9Z277	Tyrosine-protein kinase BAZ1B	Baz1b	170.65	15549000000	786590000	530190000	463910000	447740000	632210000	705930000	583950000	750190000	638230000	557590000	212340000	1264900000	877310000	1036000000	692350000	682220000	566230000	627510000	447430000	550770000	629830000	682830000	621700000	583980000	401730000	1011600000	792940000	941550000
P47911	P47911	60S ribosomal protein L6	Rpl6	33.509	15286000000	478290000	427630000	571950000	559230000	1269400000	1382400000	667410000	600210000	647980000	651580000	265460000	592300000	553800000	399460000	554950000	494460000	663800000	1035100000	815240000	947020000	843310000	605070000	670870000	706620000	433740000	549330000	493750000	441050000
P63101	P63101	14-3-3 protein zeta/delta	Ywhaz	27.771	14854000000	477570000	530860000	471910000	295760000	693420000	838650000	735180000	473000000	616540000	527030000	752160000	1079300000	1077800000	1121900000	422880000	488070000	512770000	367060000	379910000	454410000	650170000	500340000	505870000	512880000	996290000	742290000	799950000	909520000
P80314	P80314	T-complex protein 1 subunit beta	Cct2	57.477	14841000000	276850000	227300000	366160000	421450000	1229800000	647980000	660190000	682910000	668850000	552120000	257790000	390480000	637280000	418520000	307430000	358840000	490680000	512460000	676260000	489730000	652980000	592840000	583900000	629050000	444960000	401940000	656300000	456650000
P60335	P60335	Poly(rC)-binding protein 1	Pcbp1	37.497	14478000000	663500000	426950000	578540000	522650000	810780000	1111100000	731280000	635000000	609420000	631430000	338720000	549440000	653490000	513200000	562600000	512120000	699930000	630030000	608890000	738430000	793740000	542840000	602600000	667390000	442750000	470580000	601660000	519640000
Q61033	Q61033	Lamina-associated polypeptide 2, isoforms alpha/zeta	Tmpo	75.167	14298000000	977670000	545890000	334830000	193610000	565200000	586650000	305230000	647290000	628730000	448640000	1426000000	1334600000	1115200000	1117900000	919640000	649650000	506940000	349390000	391790000	391650000	380480000	634720000	622270000	570400000	1919100000	1164000000	1067900000	1187400000
Q8CG47	Q8CG47	Structural maintenance of chromosomes protein 4	Smc4	146.89	14283000000	517120000	459670000	429280000	516220000	927330000	829070000	466370000	676730000	676190000	618990000	356260000	678740000	596980000	621710000	521720000	534320000	531150000	750110000	621810000	594390000	488940000	632690000	645180000	639720000	505290000	588830000	559100000	534970000
E9Q557	E9Q557	Desmoplakin	Dsp	332.91	13910000000	870060000	921030000	244770000	244340000	842300000	248490000	563130000	652510000	622470000	523520000	81794000	107430000	71966000	161490000	811590000	1130700000	406430000	364410000	560300000	228660000	638380000	569800000	629280000	562460000	120540000	161530000	97609000	204240000
P35550	P35550	rRNA 2-O-methyltransferase fibrillarin	Fbl	34.306	13682000000	623510000	359730000	375850000	671380000	975570000	1126000000	667360000	507270000	583090000	444170000	198280000	526880000	334160000	371200000	653690000	538860000	492530000	765200000	729390000	720460000	658380000	496190000	574210000	556180000	396550000	476930000	356750000	399490000
P62827;Q14AA6;Q61820	P62827;Q14AA6;Q61820	GTP-binding nuclear protein Ran;GTP-binding nuclear protein Ran, testis-specific isoform	Ran;1700009N14Rik;Rasl2-9	24.423	13650000000	439130000	334570000	369850000	468190000	894670000	851810000	578070000	614620000	632690000	463220000	243280000	657750000	579120000	666580000	473710000	441260000	409960000	594470000	629770000	555990000	586120000	587370000	595050000	530740000	361950000	623470000	547590000	634530000
P38647	P38647	Stress-70 protein, mitochondrial	Hspa9	73.46	13480000000	508620000	359870000	442970000	552290000	592050000	730620000	656790000	553180000	528810000	533160000	322980000	626010000	704010000	631680000	480780000	493990000	548710000	681140000	457690000	465800000	674610000	533470000	564710000	562830000	481750000	541150000	574920000	610350000
Q6ZWV3;P86048	Q6ZWV3;P86048	60S ribosomal protein L10;60S ribosomal protein L10-like	Rpl10;Rpl10l	24.604	13321000000	566330000	267390000	577630000	384290000	904710000	1349000000	636860000	535980000	558170000	332800000	251160000	384790000	566910000	420380000	365560000	266570000	483730000	451570000	538630000	628540000	433550000	420760000	399130000	356920000	260000000	300290000	341990000	297260000
Q8K2B3	Q8K2B3	Succinate dehydrogenase [ubiquinone] flavoprotein subunit, mitochondrial	Sdha	72.585	13317000000	573870000	505390000	494740000	526170000	582060000	574000000	506120000	681700000	603720000	538250000	629740000	699500000	681810000	559380000	557450000	395930000	614940000	380430000	435990000	431920000	1140900000	599140000	635910000	701640000	767410000	659250000	592460000	900020000
P62281	P62281	40S ribosomal protein S11	Rps11	18.431	13156000000	474700000	353100000	392320000	581990000	806510000	1197500000	711940000	523300000	538630000	504880000	280810000	550610000	529970000	508500000	448180000	404590000	498840000	740920000	589190000	852020000	617690000	567940000	532470000	629550000	398210000	503780000	507740000	588410000
O35737	O35737	Heterogeneous nuclear ribonucleoprotein H;Heterogeneous nuclear ribonucleoprotein H, N-terminally processed	Hnrnph1	49.199	13111000000	703910000	414080000	563780000	432870000	871210000	1172200000	659420000	512360000	524460000	558630000	338430000	516610000	492560000	343020000	673120000	494640000	645630000	591940000	607150000	751780000	638410000	513570000	480570000	532500000	477210000	429780000	431140000	465430000
P63038	P63038	60 kDa heat shock protein, mitochondrial	Hspd1	60.955	13103000000	376290000	375460000	366620000	309240000	576810000	665680000	1196800000	455910000	476860000	474000000	393770000	613720000	723540000	687810000	412000000	466360000	497120000	399650000	414370000	429580000	906880000	522270000	516300000	489710000	610750000	560180000	600090000	656280000
P62754	P62754	40S ribosomal protein S6	Rps6	28.68	12941000000	628270000	297860000	351980000	757630000	804300000	1116400000	461560000	431450000	515010000	415600000	356320000	594910000	502590000	434810000	585130000	476320000	504930000	694010000	621710000	794790000	547030000	588770000	550330000	474040000	379920000	537870000	431070000	501730000
P07901	P07901	Heat shock protein HSP 90-alpha	Hsp90aa1	84.787	12926000000	275490000	311340000	291540000	352790000	1079600000	579750000	599070000	616770000	618610000	411790000	173720000	429910000	521420000	541410000	330350000	391190000	397410000	533650000	675640000	400280000	600550000	562190000	544190000	489070000	355770000	438210000	483490000	508420000
P80316	P80316	T-complex protein 1 subunit epsilon	Cct5	59.623	12865000000	235460000	205790000	349170000	292350000	945570000	602210000	552630000	511980000	475230000	520340000	201600000	441060000	473430000	506260000	284260000	321100000	436130000	402700000	622600000	434590000	564820000	489630000	531340000	548470000	330410000	390560000	494470000	439070000
Q569Z6	Q569Z6	Thyroid hormone receptor-associated protein 3	Thrap3	108.18	12735000000	789440000	770420000	734070000	188330000	727200000	1020800000	432910000	582740000	556640000	466340000	419720000	662810000	629540000	486460000	697840000	876660000	799710000	300650000	481170000	685240000	486930000	545700000	530190000	538520000	704640000	601490000	589550000	475740000
P23198	P23198	Chromobox protein homolog 3	Cbx3	20.855	12704000000	729020000	717950000	496030000	314700000	527910000	469600000	406550000	590390000	534180000	473340000	570170000	577930000	508110000	559400000	493820000	657400000	607500000	332440000	343470000	274320000	388090000	357500000	485060000	491270000	671480000	471360000	434980000	524910000
Q61686	Q61686	Chromobox protein homolog 5	Cbx5	22.186	12603000000	641080000	521690000	475880000	242610000	520480000	290900000	516280000	537270000	503860000	516570000	484810000	347800000	519630000	554790000	444280000	689730000	653780000	453320000	348920000	295570000	501590000	445410000	475380000	481850000	610750000	426010000	414280000	480540000
Q9D8E6	Q9D8E6	60S ribosomal protein L4	Rpl4	47.153	12391000000	493960000	285060000	397920000	576930000	965080000	1167900000	537990000	559780000	468420000	455080000	210790000	468110000	478040000	389550000	448530000	371470000	479850000	633740000	651670000	760020000	576660000	514140000	460780000	493610000	302700000	462260000	460070000	384690000
O08583;Q9JJW6	O08583	THO complex subunit 4	Alyref	26.94	12307000000	727950000	579800000	553310000	242530000	567010000	745840000	300470000	592540000	572620000	446860000	861020000	919110000	637860000	467640000	695540000	620500000	654700000	310620000	357270000	470050000	323780000	524030000	552050000	489780000	1141000000	771270000	661950000	506660000
Q61753	Q61753	D-3-phosphoglycerate dehydrogenase	Phgdh	56.585	12292000000	374910000	300140000	398550000	496270000	692830000	859460000	585400000	520040000	512000000	505960000	219480000	459210000	653760000	497920000	382470000	422500000	498190000	538440000	559170000	619480000	512470000	503610000	512620000	524300000	456370000	435580000	588860000	531240000
O70133	O70133	ATP-dependent RNA helicase A	Dhx9	149.47	11862000000	592540000	397000000	384880000	251850000	813950000	1242400000	488460000	424670000	509340000	390300000	245690000	645120000	549820000	478440000	517570000	505940000	462640000	415420000	533440000	661240000	470540000	429260000	481050000	449650000	397240000	472240000	453200000	449530000
P43274	P43274	Histone H1.4	Hist1h1e	21.977	11825000000	562810000	644120000	461720000	578770000	552880000	763370000	340430000	452240000	419130000	435810000	531890000	604180000	579630000	689680000	467240000	682130000	659550000	700330000	423800000	498190000	392700000	374030000	468130000	521240000	544670000	601530000	644060000	775920000
Q60972	Q60972	Histone-binding protein RBBP4	Rbbp4	47.655	11569000000	711660000	318470000	329520000	182100000	470290000	721690000	344100000	474340000	380670000	313380000	672610000	964300000	761730000	663670000	741710000	443850000	400080000	313660000	355550000	452960000	346700000	478940000	431540000	397200000	861650000	810130000	642410000	595270000
Q921F2	Q921F2	TAR DNA-binding protein 43	Tardbp	44.547	11505000000	445020000	460150000	482420000	552810000	749870000	942990000	555150000	514330000	464900000	463000000	232470000	404350000	382360000	441950000	557050000	560280000	555250000	707300000	526310000	651550000	551440000	497310000	463830000	497800000	376790000	347710000	355420000	423410000
Q60865	Q60865	Caprin-1	Caprin1	78.168	11370000000	501200000	475580000	413110000	117330000	869100000	481640000	342760000	470710000	471820000	437840000	542660000	742380000	918480000	418540000	446330000	567740000	504020000	203050000	566240000	343400000	381690000	442510000	460300000	513110000	731910000	642120000	767160000	450320000
P12970	P12970	60S ribosomal protein L7a	Rpl7a	29.976	11309000000	390040000	329540000	359830000	565390000	877490000	967620000	602320000	425740000	559100000	479740000	178650000	398960000	404800000	384920000	392490000	423770000	489910000	782910000	677610000	754710000	553260000	409020000	533400000	558120000	245270000	367690000	367730000	315620000
P63242;Q8BGY2	P63242;Q8BGY2	Eukaryotic translation initiation factor 5A-1;Eukaryotic translation initiation factor 5A-2	Eif5a;Eif5a2	16.832	11243000000	499660000	258700000	324390000	422750000	689460000	821960000	500980000	414150000	451860000	355720000	211580000	357110000	389100000	471730000	421010000	301580000	425260000	572700000	466420000	541730000	557420000	387330000	475250000	367500000	372570000	331140000	353960000	413480000
P14148	P14148	60S ribosomal protein L7	Rpl7	31.419	11240000000	449220000	239300000	342610000	576110000	856100000	918970000	526170000	545630000	436190000	313730000	188890000	472610000	421560000	310250000	445440000	341050000	444220000	754180000	626060000	688080000	561230000	497720000	431660000	450060000	259280000	386180000	378230000	336630000
P13864	P13864	DNA (cytosine-5)-methyltransferase 1	Dnmt1	183.19	11133000000	335910000	252510000	336760000	194060000	798790000	700700000	640760000	461620000	461440000	428870000	146550000	699160000	646210000	694400000	339010000	314590000	471920000	312290000	524710000	499930000	613240000	433930000	454250000	456910000	287610000	610940000	515790000	609010000
P47955	P47955	60S acidic ribosomal protein P1	Rplp1	11.475	11092000000	621080000	450470000	456940000	556500000	827380000	783820000	466170000	489760000	443990000	341860000	245590000	350140000	340590000	300990000	508530000	499870000	420230000	755730000	550090000	449270000	456650000	413040000	418000000	375040000	325990000	289270000	286810000	282540000
Q62167;P16381	Q62167;P16381	ATP-dependent RNA helicase DDX3X;Putative ATP-dependent RNA helicase Pl10	Ddx3x;D1Pas1	73.101	11014000000	458890000	271180000	285530000	565830000	814630000	994920000	471250000	377250000	548380000	342190000	60114000	266220000	345930000	288850000	492670000	359940000	477840000	646970000	571060000	600830000	564870000	426710000	454310000	484150000	157290000	320260000	362520000	329880000
Q9JIK5	Q9JIK5	Nucleolar RNA helicase 2	Ddx21	93.55	10967000000	329020000	335430000	382140000	543510000	826360000	1005000000	531920000	421800000	458090000	392690000	115750000	331140000	260730000	277650000	349500000	395760000	504340000	693560000	564190000	664330000	541510000	437730000	471980000	448680000	223290000	329000000	287520000	308940000
P05064;A6ZI46;A6ZI47;P05063;Q91Y97	P05064;A6ZI46	Fructose-bisphosphate aldolase A;Fructose-bisphosphate aldolase	Aldoa;Aldoart1	39.355	10908000000	238860000	208230000	194180000	446310000	571680000	398340000	714070000	478240000	437620000	408900000	405910000	746890000	658550000	853210000	258990000	305000000	277990000	553070000	382140000	242530000	636670000	456250000	424650000	430250000	528600000	636180000	580320000	730060000
P62242	P62242	40S ribosomal protein S8	Rps8	24.205	10871000000	428900000	283040000	349830000	434730000	809530000	910570000	483080000	447300000	502550000	443170000	203180000	409570000	356030000	323740000	432920000	361480000	410910000	564630000	596300000	681470000	498510000	454870000	486620000	474920000	327780000	384810000	365930000	340810000
P42932	P42932	T-complex protein 1 subunit theta	Cct8	59.555	10866000000	183130000	223630000	331890000	208360000	800310000	500800000	515970000	424890000	463010000	465740000	135160000	339600000	482450000	358040000	213050000	288240000	380910000	312730000	511860000	372530000	482760000	432540000	434660000	444360000	233400000	314850000	454320000	354800000
P62996	P62996	Transformer-2 protein homolog beta	Tra2b	33.665	10853000000	485830000	472850000	352570000	224200000	584300000	755080000	438990000	446740000	455570000	454980000	532220000	642310000	769650000	613770000	448060000	609170000	438180000	350740000	453550000	563430000	426970000	421890000	471580000	488090000	770460000	558270000	649760000	591210000
Q62318	Q62318	Transcription intermediary factor 1-beta	Trim28	88.846	10827000000	459400000	528310000	538030000	396850000	826080000	907710000	403390000	426650000	466160000	380060000	167210000	254110000	226050000	219750000	445630000	546570000	630200000	491580000	508590000	570050000	482530000	378700000	435530000	427060000	222540000	248530000	252920000	242610000
Q05144;P60764;Q8R527;Q9ER71	Q05144;P60764	Ras-related C3 botulinum toxin substrate 2;Ras-related C3 botulinum toxin substrate 3	Rac2;Rac3	21.441	10769000000	485680000	275670000	356060000	488080000	697360000	811330000	608270000	532690000	420430000	308990000	233910000	263480000	448180000	348060000	476150000	356730000	374420000	596830000	559050000	682650000	552320000	523620000	455290000	447370000	364960000	324110000	410650000	352910000
P19096	P19096	Fatty acid synthase;[Acyl-carrier-protein] S-acetyltransferase;[Acyl-carrier-protein] S-malonyltransferase;3-oxoacyl-[acyl-carrier-protein] synthase;3-oxoacyl-[acyl-carrier-protein] reductase;3-hydroxyacyl-[acyl-carrier-protein] dehydratase;Enoyl-[acyl-carrier-protein] reductase;Oleoyl-[acyl-carrier-protein] hydrolase	Fasn	272.43	10636000000	87891000	51528000	124760000	383720000	1046400000	974320000	486770000	283160000	275150000	484810000	46764000	213650000	702280000	440770000	235670000	191550000	354230000	390210000	525350000	503230000	451650000	432010000	442400000	445300000	195570000	351740000	460840000	399050000
P56480	P56480	ATP synthase subunit beta, mitochondrial	Atp5b	56.3	10602000000	373420000	274460000	390180000	204620000	474500000	544220000	576650000	534290000	456180000	398120000	429300000	674210000	900710000	695530000	320790000	335410000	439150000	284620000	295470000	395680000	552110000	428640000	429340000	433520000	526750000	477860000	672390000	579020000
Q9Z1R9	Q9Z1R9		Prss1	26.134	10594000000	0	5574000000	0	0	0	0	0	0	0	0	0	0	0	0	0	7105800000	0	0	0	0	0	0	0	0	0	0	0	0
P62245	P62245	40S ribosomal protein S15a	Rps15a	14.839	10330000000	486700000	381740000	259920000	363770000	678260000	756130000	455440000	403380000	377610000	445520000	399880000	417190000	452470000	372960000	334240000	368260000	289990000	394890000	436980000	436300000	449690000	339260000	364340000	415060000	425910000	298660000	355350000	308280000
P14206	P14206	40S ribosomal protein SA	Rpsa	32.838	10309000000	301140000	260240000	256760000	281070000	677550000	569080000	524720000	445100000	419400000	405790000	385610000	504830000	485090000	503190000	295560000	302920000	307610000	354780000	458210000	385350000	504530000	371880000	395200000	421130000	519480000	403910000	385250000	469980000
P62960;Q9Z2C8	P62960	Nuclease-sensitive element-binding protein 1	Ybx1	35.73	10260000000	649350000	502130000	561780000	246790000	785850000	867420000	390970000	360870000	428490000	432280000	187660000	291280000	397310000	228080000	656980000	632760000	617340000	439150000	561700000	528590000	385670000	409640000	425260000	444320000	467070000	282500000	323790000	244800000
P50580	P50580	Proliferation-associated protein 2G4	Pa2g4	43.698	10133000000	256420000	390720000	336600000	300020000	609630000	539410000	520360000	397210000	451410000	389800000	207660000	326110000	390120000	401440000	258620000	312290000	408060000	379860000	468390000	410080000	519300000	435870000	406920000	399260000	362080000	333840000	359290000	407390000
P62301	P62301	40S ribosomal protein S13	Rps13	17.222	9997300000	525660000	407950000	358760000	339550000	665060000	856430000	396020000	437010000	213520000	339350000	319700000	380460000	368420000	275430000	464900000	521930000	439290000	402290000	506840000	596950000	424150000	407130000	393440000	378920000	407630000	347810000	458830000	368790000
Q9CWF2;Q7TMM9	Q9CWF2;Q7TMM9	Tubulin beta-2B chain;Tubulin beta-2A chain	Tubb2b;Tubb2a	49.953	9797600000	253340000	144460000	903010000	285520000	1670100000	493860000	412960000	304750000	334280000	314580000	174660000	251440000	1113200000	412420000	140980000	176790000	1179300000	230650000	298580000	218010000	812170000	193560000	211350000	265080000	214860000	71004000	253880000	122710000
Q60668	Q60668	Heterogeneous nuclear ribonucleoprotein D0	Hnrnpd	38.354	9588600000	191540000	461270000	428460000	109290000	625450000	701790000	505270000	215070000	443070000	240990000	165970000	633590000	706570000	608930000	239680000	358380000	353680000	247920000	363780000	476230000	410110000	383550000	319440000	432000000	424690000	478680000	618340000	529740000
B2RQC6;Q8C196	B2RQC6	CAD protein;Glutamine-dependent carbamoyl-phosphate synthase;Aspartate carbamoyltransferase;Dihydroorotase	Cad	243.24	9556800000	303890000	225630000	271960000	433000000	673550000	853650000	529550000	364390000	376250000	393550000	39078000	329740000	390900000	312230000	337190000	322200000	362880000	568350000	440550000	521100000	565300000	361040000	408190000	409210000	137190000	294350000	341900000	321100000
P60122	P60122	RuvB-like 1	Ruvbl1	50.213	9513600000	465670000	371500000	326080000	287130000	514180000	493700000	375540000	328380000	423770000	395990000	242590000	422350000	410410000	383450000	440720000	470770000	425330000	374060000	384280000	357280000	390740000	395180000	411330000	428540000	327180000	386270000	388520000	386660000
Q9Z1Q5	Q9Z1Q5	Chloride intracellular channel protein 1	Clic1	27.013	9455100000	271920000	267950000	333010000	329610000	599190000	713550000	362820000	420600000	398080000	349010000	286640000	409530000	385120000	411660000	279310000	364090000	434900000	431500000	478970000	532180000	368550000	408000000	418930000	398300000	409520000	385520000	385470000	429560000
Q8BHX3	Q8BHX3	Borealin	Cdca8	32.214	9441400000	603830000	444570000	340000000	270900000	432040000	358100000	275990000	394050000	409360000	359850000	512550000	621600000	380300000	466440000	561800000	623930000	450090000	304140000	292890000	284450000	283480000	402960000	420060000	402010000	724670000	525750000	398560000	449430000
P80318	P80318	T-complex protein 1 subunit gamma	Cct3	60.629	9246900000	193530000	174950000	253350000	209460000	672190000	518880000	445170000	330580000	372430000	352410000	143270000	329530000	469030000	273400000	221220000	237620000	292460000	288890000	425550000	345700000	393570000	335150000	376400000	362230000	213740000	271540000	409520000	284170000
Q8C156	Q8C156	Condensin complex subunit 2	Ncaph	82.302	9243200000	525790000	365040000	294960000	343580000	465610000	456180000	203360000	405990000	372270000	333220000	436930000	551840000	420440000	403060000	475300000	461760000	400230000	420420000	364770000	343670000	266640000	385320000	407050000	416970000	527070000	470700000	414430000	390320000
A2APB8	A2APB8	Targeting protein for Xklp2	Tpx2	85.893	9228700000	499940000	411440000	333130000	313360000	470300000	443900000	460300000	385220000	414300000	341320000	227200000	605540000	454750000	510520000	472240000	503380000	488570000	404870000	307260000	328960000	462040000	381100000	379790000	390140000	349800000	515560000	411780000	504830000
P49717;Q9CWV1	P49717	DNA replication licensing factor MCM4	Mcm4	96.735	9052400000	385580000	202990000	277740000	452830000	713220000	740640000	416690000	457800000	367730000	286610000	69814000	199140000	179370000	204150000	341710000	280530000	357360000	505130000	439310000	475950000	408160000	350400000	338780000	316090000	149140000	214280000	206850000	210410000
Q9WU62	Q9WU62	Inner centromere protein	Incenp	101.21	8888700000	386690000	548870000	350750000	235370000	423550000	417950000	279860000	343690000	325550000	400400000	173400000	427920000	375790000	372810000	445850000	531170000	464360000	374190000	300460000	288610000	322680000	350190000	357480000	385410000	334980000	436950000	367330000	337910000
P28656	P28656	Nucleosome assembly protein 1-like 1	Nap1l1	45.345	8837900000	249420000	229180000	264560000	255040000	672710000	519260000	243960000	350460000	316320000	293790000	246220000	430980000	388520000	333670000	232990000	268410000	385490000	367360000	380130000	316490000	290610000	269940000	348050000	337040000	359660000	362930000	306220000	339120000
P25976	P25976	Nucleolar transcription factor 1	Ubtf	89.508	8824900000	818320000	138170000	464750000	103340000	316240000	758620000	212470000	326710000	344040000	294380000	867600000	601450000	505010000	457900000	650000000	217920000	574420000	162160000	218000000	474530000	228610000	322760000	356890000	358780000	1079100000	513460000	426200000	411880000
P40142	P40142	Transketolase	Tkt	67.63	8793600000	184970000	231040000	199070000	204740000	549010000	416620000	421560000	365150000	377630000	313650000	251990000	490900000	411750000	540440000	197470000	295810000	277480000	255370000	360010000	286670000	460890000	363520000	363700000	391970000	363770000	446370000	374630000	520210000
P47962	P47962	60S ribosomal protein L5	Rpl5	34.4	8787500000	231110000	187870000	310060000	326500000	710240000	766680000	498130000	292290000	405180000	390600000	85892000	316930000	247570000	209900000	220170000	246140000	349570000	448260000	408510000	417480000	467930000	284220000	357330000	399650000	193150000	250100000	262380000	261380000
E9Q7G0	E9Q7G0		Numa1	235.63	8772900000	374910000	270570000	436630000	156740000	297040000	574750000	243160000	385900000	387100000	335970000	362390000	801710000	571730000	716660000	385650000	369610000	513920000	262500000	242340000	367340000	294850000	357030000	371600000	382290000	509610000	628080000	497290000	606190000
P08113	P08113	Endoplasmin	Hsp90b1	92.475	8699400000	155100000	168580000	214040000	120370000	319730000	313770000	519320000	405670000	374510000	342730000	558410000	745550000	704850000	801740000	201590000	268920000	263520000	186650000	242890000	242240000	495590000	381160000	372620000	368960000	634200000	613980000	638080000	732770000
P97311	P97311	DNA replication licensing factor MCM6	Mcm6	92.866	8500500000	317650000	231040000	278690000	381810000	557650000	668980000	369000000	318220000	359760000	304150000	107150000	209230000	215640000	182860000	301400000	277570000	378180000	464120000	406490000	404150000	386560000	339700000	361560000	346180000	184690000	219440000	220880000	251270000
A0A140T8T4;P51410	A0A140T8T4;P51410	60S ribosomal protein L9	Rpl9	21.853	8490300000	316780000	121750000	277530000	301150000	551310000	850150000	334200000	359540000	289010000	272070000	167910000	300250000	313810000	244170000	341430000	241450000	319470000	401760000	413710000	552940000	347340000	318220000	340750000	325540000	231920000	278740000	257710000	248290000
Q8BVY0	Q8BVY0	Ribosomal L1 domain-containing protein 1	Rsl1d1	50.421	8487000000	216390000	281410000	190580000	457290000	741420000	575920000	458560000	373630000	363480000	354830000	71548000	341520000	225840000	257150000	260650000	339710000	275060000	611470000	519540000	383170000	462860000	354970000	356530000	366510000	139080000	311160000	225960000	272070000
Q02257;Q02248	Q02257	Junction plakoglobin	Jup	81.8	8481800000	410130000	857990000	170920000	128270000	378620000	209290000	351650000	348530000	272350000	533870000	17424000	127330000	114070000	104500000	481290000	616270000	207590000	241770000	345540000	152310000	317570000	406690000	357190000	324160000	98688000	122450000	69421000	93019000
P11983	P11983	T-complex protein 1 subunit alpha	Tcp1	60.448	8417000000	149750000	143180000	196190000	262600000	789910000	512180000	338820000	344930000	336120000	296050000	99312000	238350000	321470000	248410000	185490000	185810000	278580000	334210000	411070000	344540000	371120000	341460000	350540000	363040000	172910000	233270000	306640000	250810000
Q9D6Z1	Q9D6Z1	Nucleolar protein 56	Nop56	64.464	8407200000	289890000	269900000	219330000	458530000	822950000	674370000	522960000	350170000	355250000	343280000	99501000	266800000	195090000	204580000	281200000	338850000	288120000	554770000	507730000	420230000	503520000	320410000	331790000	330290000	144430000	251850000	190700000	214030000
P84104	P84104	Serine/arginine-rich splicing factor 3	Srsf3	19.329	8380300000	528200000	411660000	359650000	191450000	443900000	679920000	280500000	355360000	373320000	365190000	535790000	416440000	465020000	329120000	497290000	536930000	431990000	289280000	333490000	512090000	315700000	348140000	391330000	402140000	712330000	372010000	420320000	349090000
P80317;Q61390	P80317	T-complex protein 1 subunit zeta	Cct6a	58.004	8325300000	131970000	175620000	205910000	201330000	730490000	426940000	371260000	312370000	348300000	285140000	135400000	256010000	303790000	205810000	208210000	240710000	307350000	307520000	439030000	295650000	391070000	332100000	361030000	375200000	222320000	269370000	345250000	261870000
Q99JF8	Q99JF8	PC4 and SFRS1-interacting protein	Psip1	59.696	8293300000	425770000	374670000	397430000	108790000	320400000	431230000	240150000	302440000	347950000	323680000	329570000	690910000	698920000	713140000	377360000	444150000	521240000	173030000	202980000	269440000	228170000	300750000	338260000	329930000	482140000	502690000	548500000	611070000
Q8VIJ6	Q8VIJ6	Splicing factor, proline- and glutamine-rich	Sfpq	75.441	8137200000	256530000	425620000	238050000	183280000	833970000	406600000	222770000	313520000	363060000	392420000	291700000	399790000	508950000	332290000	221930000	389020000	379340000	235000000	558520000	286320000	285960000	349220000	317590000	358670000	365490000	308260000	486670000	360880000
Q8BK67	Q8BK67	Protein RCC2	Rcc2	55.983	7965300000	322790000	166050000	230010000	219330000	542030000	478500000	356810000	380040000	309030000	276130000	84579000	275760000	290360000	285650000	275960000	204730000	291990000	283880000	377490000	368640000	362850000	328650000	357930000	337880000	137470000	313180000	312000000	364320000
G3X9B1	G3X9B1		Heatr1	242.07	7917700000	143370000	118270000	62546000	331830000	451260000	384210000	456250000	224210000	208560000	245200000	44896000	188230000	128300000	174470000	209700000	276850000	171060000	531130000	428160000	308430000	524040000	336360000	344640000	317780000	114620000	269270000	205420000	249660000
P62267	P62267	40S ribosomal protein S23	Rps23	15.807	7831000000	193830000	291650000	210340000	243300000	508790000	639880000	250740000	529450000	341820000	235020000	163720000	256910000	290870000	187160000	245440000	312060000	368410000	422630000	459790000	493220000	326430000	333320000	371430000	329540000	193630000	261310000	261360000	234960000
A0A2I3BRL8;Q91VM5;Q9WV02;Q9DAE2	A0A2I3BRL8;Q91VM5;Q9WV02	RNA binding motif protein, X-linked-like-1;RNA-binding motif protein, X chromosome;RNA-binding motif protein, X chromosome, N-terminally processed	Rbmxl1;Rbmx	42.178	7690300000	438680000	427290000	279000000	123450000	425370000	448480000	272520000	336070000	315100000	318490000	382580000	433570000	478820000	308220000	446900000	512010000	331560000	199050000	299140000	309970000	286620000	323020000	332120000	330690000	576060000	385620000	417350000	300380000
Q6ZWN5	Q6ZWN5	40S ribosomal protein S9	Rps9	22.591	7680200000	182790000	208960000	303610000	197420000	546290000	586450000	291510000	298140000	305020000	279670000	145470000	331730000	327280000	302210000	254260000	249790000	322730000	441610000	477680000	435930000	345590000	265540000	359510000	357240000	228110000	248060000	259050000	253250000
Q8CGC7	Q8CGC7	Bifunctional glutamate/proline--tRNA ligase;Glutamate--tRNA ligase;Proline--tRNA ligase	Eprs	170.08	7616700000	176910000	120450000	191160000	259790000	558380000	520350000	386310000	275370000	241760000	270670000	42056000	348790000	373600000	285110000	190230000	193000000	263230000	342140000	354770000	318280000	397980000	294030000	298790000	313640000	125320000	258530000	294610000	268450000
P48725	P48725	Pericentrin	Pcnt	329.46	7588800000	436840000	360050000	328210000	182900000	336180000	429300000	167210000	332540000	346920000	294970000	771060000	407140000	340150000	332060000	438650000	436360000	398520000	275780000	252590000	281820000	205560000	322330000	333400000	327990000	828120000	378240000	321460000	330530000
P33174;E9PX57;P28741	P33174	Chromosome-associated kinesin KIF4	Kif4	139.52	7521800000	718100000	284860000	365350000	177450000	359980000	422210000	192070000	310070000	275610000	315520000	126420000	496900000	455550000	419320000	357960000	328120000	468910000	279830000	249710000	307080000	237630000	326730000	339260000	312230000	230180000	475160000	407770000	385510000
Q9EPU0	Q9EPU0	Regulator of nonsense transcripts 1	Upf1	123.97	7512300000	377470000	248980000	288700000	253400000	404320000	623960000	350180000	372100000	305660000	328000000	178940000	329160000	317450000	299730000	394070000	361230000	329650000	336340000	330820000	376010000	302790000	333180000	315300000	312000000	263210000	291100000	301440000	257840000
Q61599	Q61599	Rho GDP-dissociation inhibitor 2	Arhgdib	22.851	7460700000	212590000	220760000	279630000	199390000	428130000	449340000	394940000	328390000	282930000	269100000	263080000	314670000	326790000	364720000	163770000	252420000	360660000	247490000	283980000	276930000	408750000	306470000	290270000	282140000	332420000	264080000	257470000	331390000
P61255	P61255	60S ribosomal protein L26	Rpl26	17.258	7430100000	261240000	219090000	288820000	303990000	479820000	726900000	338820000	295710000	243300000	313040000	173740000	337880000	261220000	240560000	253930000	235270000	298740000	408880000	301960000	396600000	278170000	251700000	252540000	272900000	222380000	261180000	229440000	252040000
Q9CQ71	Q9CQ71	Replication protein A 14 kDa subunit	Rpa3	13.584	7412400000	217270000	97450000	318000000	206970000	153990000	347850000	239150000	321880000	140740000	125040000	1082200000	605970000	529800000	317340000	474510000	253630000	331880000	250440000	258080000	279130000	245860000	324720000	331700000	336570000	797910000	447220000	416370000	460700000
Q6DFW4	Q6DFW4	Nucleolar protein 58	Nop58	60.342	7335500000	272030000	216970000	192890000	398580000	729590000	505760000	439940000	293970000	314100000	271630000	100940000	247830000	172060000	139260000	260520000	310350000	247910000	493600000	418570000	317650000	450610000	293210000	293650000	295470000	182210000	202250000	151530000	161780000
P97461	P97461	40S ribosomal protein S5;40S ribosomal protein S5, N-terminally processed	Rps5	22.889	7315100000	346560000	229760000	194000000	312920000	576650000	587990000	357900000	337690000	317250000	332620000	186800000	259780000	324100000	202890000	285980000	269960000	290910000	511140000	398240000	426810000	373080000	298910000	315010000	341640000	236980000	232440000	301660000	316530000
Q9WTI7;O88329	Q9WTI7	Unconventional myosin-Ic	Myo1c	121.94	7216200000	478580000	251220000	173370000	112600000	277700000	654620000	167170000	316370000	279970000	239800000	399030000	750540000	461130000	537800000	484020000	287730000	233370000	170640000	210800000	410050000	169600000	317040000	306620000	301360000	547310000	588430000	416490000	483970000
P53026	P53026	60S ribosomal protein L10a	Rpl10a	24.916	7180100000	387480000	253240000	261970000	358010000	516000000	781020000	304020000	286390000	309140000	254730000	127030000	254770000	218560000	169930000	392640000	298140000	336760000	453190000	343910000	529910000	308430000	275800000	295520000	277380000	201700000	237100000	203900000	175690000
Q04750;Q8R4U6	Q04750	DNA topoisomerase 1	Top1	90.875	7116700000	628160000	269390000	285880000	150230000	347040000	456930000	217130000	239530000	263290000	273170000	269660000	515300000	420930000	309310000	546180000	328390000	356370000	239890000	256520000	328590000	249420000	263180000	301500000	310450000	352960000	399550000	358970000	302680000
Q61881	Q61881	DNA replication licensing factor MCM7	Mcm7	81.21	7002300000	243670000	164860000	198920000	358830000	480400000	559690000	384680000	306730000	276910000	270770000	44354000	144190000	143390000	143040000	245940000	216680000	293090000	428890000	353420000	365180000	369330000	285690000	281930000	327020000	126150000	156340000	194230000	189500000
Q61687	Q61687	Transcriptional regulator ATRX	Atrx	278.58	6980100000	456270000	239610000	243600000	52269000	120540000	169370000	128670000	353660000	272560000	287390000	547220000	867580000	576850000	536620000	391270000	284600000	331710000	138580000	128540000	142910000	179520000	311470000	284310000	293890000	616640000	651460000	469240000	488270000
P08752;B2RSH2	P08752	Guanine nucleotide-binding protein G(i) subunit alpha-2	Gnai2	40.489	6913100000	330940000	251090000	212140000	213670000	374520000	329240000	107140000	282320000	273860000	256750000	283420000	530650000	441530000	308300000	337920000	322270000	245690000	268460000	246870000	231870000	209430000	290310000	287700000	281190000	364380000	366230000	399700000	371720000
Q60952	Q60952	Centrosome-associated protein CEP250	Cep250	276.81	6894300000	440550000	271850000	196070000	84575000	207570000	271200000	62618000	294770000	253070000	249500000	954170000	529530000	446310000	548670000	380100000	344780000	277630000	199690000	195090000	214280000	105640000	285590000	294000000	291360000	1046700000	434610000	405550000	475350000
P62918	P62918	60S ribosomal protein L8	Rpl8	28.024	6885100000	294310000	180480000	306150000	241240000	617750000	663270000	332890000	326900000	302730000	302990000	120490000	183130000	200180000	182870000	297560000	254190000	326790000	430450000	449050000	417950000	355810000	291270000	313100000	335270000	150790000	167740000	171560000	185040000
D0QMC3	D0QMC3	Myeloid cell nuclear differentiation antigen-like protein	Mndal	60.526	6856500000	242980000	327460000	346350000	201270000	348250000	565330000	161060000	294400000	275960000	270270000	180240000	549450000	407730000	366160000	213400000	372070000	405080000	278270000	232170000	346020000	206720000	266870000	272160000	276670000	249850000	425490000	335360000	359050000
P97379	P97379	Ras GTPase-activating protein-binding protein 2	G3bp2	54.087	6817500000	460480000	374230000	214010000	128950000	440700000	242660000	156970000	337070000	325020000	220010000	514820000	409920000	418280000	265540000	415020000	423920000	268200000	182760000	322200000	195590000	165070000	301210000	299080000	282890000	631530000	370470000	387090000	279480000
Q8K2Z4	Q8K2Z4	Condensin complex subunit 1	Ncapd2	155.66	6778000000	326210000	161370000	138580000	306510000	522410000	508110000	206740000	310190000	302510000	255140000	114790000	341300000	269590000	255000000	296500000	258080000	225850000	404940000	306880000	317990000	212120000	271240000	293690000	280890000	219670000	295140000	287260000	247350000
Q3TWW8	Q3TWW8	Serine/arginine-rich splicing factor 6	Srsf6	39.025	6771200000	297500000	253270000	330890000	111270000	424320000	557590000	440650000	273460000	229400000	362220000	194440000	377230000	355220000	279880000	352200000	336950000	391350000	237360000	303850000	373100000	357240000	204460000	316650000	435030000	290130000	313180000	317630000	259700000
P14115	P14115	60S ribosomal protein L27a	Rpl27a	16.605	6751900000	244490000	137810000	229940000	345600000	533460000	572940000	203630000	364330000	194300000	239210000	120990000	259280000	283890000	213210000	288200000	252290000	300290000	357010000	326150000	416010000	310470000	286060000	274770000	274500000	177910000	255300000	264120000	228450000
P62259	P62259	14-3-3 protein epsilon	Ywhae	29.174	6697700000	204100000	262800000	237660000	87985000	295670000	346040000	362120000	242970000	278760000	267150000	308290000	441190000	385430000	467660000	187000000	253660000	255540000	148720000	232920000	201090000	366920000	236270000	294230000	275090000	375290000	348420000	346840000	408290000
O35381;Q64G17	O35381	Acidic leucine-rich nuclear phosphoprotein 32 family member A	Anp32a	28.537	6680000000	264390000	163110000	299330000	218110000	442030000	477380000	336650000	236860000	267900000	250760000	136470000	171270000	219480000	288780000	226220000	259590000	377960000	247270000	314500000	338030000	317710000	264690000	267370000	273200000	220100000	226720000	200360000	304610000
Q6PHQ9;G5E8X2	Q6PHQ9	Polyadenylate-binding protein	Pabpc4	72.242	6668900000	399710000	238290000	213300000	247540000	472560000	430590000	281580000	285670000	333600000	270620000	221340000	241070000	269040000	206170000	349990000	317550000	273940000	275900000	314520000	278950000	265970000	258310000	311100000	282350000	277300000	228050000	244180000	216210000
Q9CWJ9	Q9CWJ9	Bifunctional purine biosynthesis protein PURH;Phosphoribosylaminoimidazolecarboxamide formyltransferase;IMP cyclohydrolase	Atic	64.217	6651500000	163310000	81765000	152010000	242190000	518030000	332770000	250620000	258610000	256740000	237440000	114900000	272420000	202030000	227870000	173720000	181660000	213250000	286970000	331760000	233640000	283490000	249970000	256230000	263850000	208830000	211800000	200090000	276790000
Q5SUA5;Q5SYD0	Q5SUA5	Unconventional myosin-Ig	Myo1g	117.23	6640900000	408780000	201720000	128350000	143110000	316670000	433380000	140380000	320510000	257920000	265180000	363350000	597010000	424580000	422020000	388250000	274100000	189270000	205330000	230130000	284130000	189610000	297280000	260510000	269950000	466420000	489090000	342620000	399880000
Q8K310	Q8K310	Matrin-3	Matr3	94.629	6619000000	330910000	300830000	254560000	238800000	395920000	548300000	268200000	333400000	275180000	203190000	201890000	304600000	293700000	233060000	340020000	361290000	334950000	281890000	304460000	372540000	268870000	294780000	293310000	255610000	283450000	260420000	275350000	226800000
P97822	P97822	Acidic leucine-rich nuclear phosphoprotein 32 family member E	Anp32e	29.622	6612500000	333940000	286470000	242440000	313920000	339860000	465480000	248840000	269830000	217160000	213400000	195730000	198910000	194900000	217650000	287640000	287260000	274830000	402440000	291060000	308380000	264500000	267900000	243030000	273610000	289450000	212110000	197540000	210600000
P49718	P49718	DNA replication licensing factor MCM5	Mcm5	82.406	6489500000	278320000	160530000	191740000	258080000	434490000	610040000	373290000	266540000	189140000	194360000	28922000	144290000	117370000	95984000	229090000	169430000	241100000	389730000	290610000	324590000	373280000	204910000	259640000	276900000	81383000	145760000	135760000	152980000
P24547	P24547	Inosine-5-monophosphate dehydrogenase 2	Impdh2	55.814	6449900000	234680000	186630000	201820000	316930000	456360000	363870000	324140000	261020000	256640000	270980000	87427000	198200000	161600000	174650000	230060000	229470000	275320000	427920000	322780000	258410000	321130000	280300000	283940000	298180000	146080000	179490000	166340000	195030000
P62849	P62849	40S ribosomal protein S24	Rps24	15.423	6443900000	280940000	267190000	208330000	308860000	469060000	576260000	315770000	251420000	280350000	238020000	99154000	183600000	159590000	183100000	223550000	301370000	234710000	364000000	282770000	345080000	292700000	202070000	234120000	232520000	117320000	148140000	139730000	158970000
Q8BP67	Q8BP67	60S ribosomal protein L24	Rpl24	17.779	6375300000	335150000	203040000	197520000	279070000	484690000	550610000	302870000	313270000	254100000	216720000	128680000	183400000	192970000	128490000	279450000	198710000	208820000	332790000	283420000	342110000	263880000	235780000	231240000	208760000	155540000	149920000	146690000	118880000
P17225	P17225	Polypyrimidine tract-binding protein 1	Ptbp1	56.477	6367600000	277030000	188820000	189110000	332340000	406660000	599020000	270740000	261400000	223110000	234880000	111120000	246550000	259470000	179860000	278920000	208170000	245800000	448400000	299300000	369400000	311180000	253180000	246210000	259060000	186520000	229140000	270420000	247800000
P17751	P17751	Triosephosphate isomerase	Tpi1	26.712	6361700000	118260000	165190000	209630000	157840000	325930000	338790000	321930000	307450000	278190000	238020000	241190000	434590000	313280000	447580000	125720000	219360000	261150000	223890000	228680000	226430000	333760000	286710000	263690000	270960000	337090000	354460000	304840000	447540000
Q6ZWU9	Q6ZWU9	40S ribosomal protein S27	Rps27	9.461	6268200000	166070000	267170000	181090000	219860000	470400000	325490000	322170000	205600000	294740000	237190000	135450000	282400000	245100000	206560000	152670000	349630000	243620000	282640000	349390000	244250000	345430000	210180000	298660000	272550000	203520000	270390000	234950000	213400000
Q8BL97	Q8BL97	Serine/arginine-rich splicing factor 7	Srsf7	30.817	6262100000	404240000	274430000	237800000	198010000	380960000	604770000	242060000	271150000	270630000	255220000	292220000	333970000	319990000	242230000	457640000	331070000	295570000	201310000	264200000	436690000	207220000	269960000	292350000	297440000	368410000	316250000	290500000	271410000
Q91VC3;A0A0N4SVP8;E9PV04	Q91VC3;A0A0N4SVP8;E9PV04	Eukaryotic initiation factor 4A-III;Eukaryotic initiation factor 4A-III, N-terminally processed	Eif4a3;Gm8994	46.839	6239600000	268590000	244610000	185990000	296580000	382920000	594750000	280000000	247300000	262190000	178590000	72843000	253470000	153480000	191280000	207070000	220720000	242320000	281440000	237890000	299620000	297960000	191520000	239950000	243770000	118150000	178690000	169060000	176650000
Q9QYJ0	Q9QYJ0	DnaJ homolog subfamily A member 2	Dnaja2	45.745	6218000000	178720000	227440000	225400000	201870000	334190000	400110000	188160000	315470000	219690000	146120000	101870000	250440000	316790000	158250000	253950000	258590000	285630000	300190000	286350000	239530000	260030000	286940000	264940000	203930000	191780000	215700000	269130000	212020000
Q7TNV0	Q7TNV0	Protein DEK	Dek	43.158	6216900000	255360000	113490000	230800000	84672000	388410000	357930000	225940000	243900000	256430000	226170000	135290000	504140000	459710000	338290000	229880000	136460000	297420000	136260000	263060000	216170000	240150000	251520000	259290000	262600000	180760000	412710000	406730000	292200000
Q60864	Q60864	Stress-induced-phosphoprotein 1	Stip1	62.581	6121300000	128040000	142460000	214710000	191090000	384300000	302110000	282890000	292640000	255620000	214710000	189090000	249220000	250550000	296330000	149340000	183160000	253200000	230620000	272360000	209180000	295110000	255900000	248310000	236560000	281030000	219580000	217440000	264080000
Q61233;Q99K51;Q3V0K9	Q61233	Plastin-2	Lcp1	70.148	6113100000	261030000	172250000	217270000	61865000	219500000	380480000	327250000	289780000	229740000	218850000	367350000	370400000	590220000	473980000	228270000	225940000	269390000	117800000	175850000	262150000	301520000	273480000	246480000	269660000	459900000	342070000	488630000	408020000
Q810V0	Q810V0	U3 small nucleolar ribonucleoprotein protein MPP10	Mphosph10	78.734	6080500000	301910000	316830000	174810000	271410000	451430000	275290000	268730000	277140000	264420000	263300000	151670000	168530000	127860000	135620000	265450000	361520000	233200000	329060000	283310000	177550000	245140000	239490000	250220000	289020000	219890000	170250000	146580000	164020000
Q3U9G9	Q3U9G9	Lamin-B receptor	Lbr	71.439	6058300000	291780000	262360000	122740000	238030000	263800000	318180000	374620000	316700000	293120000	212970000	226110000	240850000	228540000	286660000	276020000	252810000	203340000	275470000	238320000	200120000	363750000	260130000	265050000	277560000	322130000	221640000	250060000	264230000
Q6PDQ2	Q6PDQ2	Chromodomain-helicase-DNA-binding protein 4	Chd4	217.75	6027400000	258210000	167630000	231260000	135430000	279620000	398310000	260460000	259230000	257710000	221240000	112990000	512780000	336710000	409710000	250690000	202040000	272600000	236380000	208340000	255810000	249560000	246220000	259010000	235550000	186660000	385890000	315740000	344040000
P62889	P62889	60S ribosomal protein L30	Rpl30	12.784	6005600000	302040000	181840000	252620000	253450000	318200000	554590000	300520000	259070000	201280000	185660000	154590000	208100000	266410000	218650000	258780000	199740000	231230000	322960000	263050000	332010000	250150000	236730000	227100000	222120000	189900000	163590000	203810000	175840000
O70251	O70251	Elongation factor 1-beta	Eef1b	24.693	6005300000	165480000	126110000	173560000	157700000	299200000	287800000	279740000	255890000	237320000	220250000	168350000	255870000	210310000	247650000	145920000	151930000	216750000	188990000	281840000	180070000	277840000	223740000	198070000	241480000	213780000	196190000	245810000	224240000
Q9CRB9	Q9CRB9	MICOS complex subunit Mic19	Chchd3	26.334	5993000000	369210000	203780000	227840000	124310000	354750000	395380000	254240000	265420000	258210000	253110000	124800000	292630000	353490000	329170000	364330000	283360000	361000000	194240000	235540000	277270000	257480000	242570000	253620000	267240000	159520000	281290000	358440000	324610000
Q8K224	Q8K224	N-acetyltransferase 10	Nat10	115.42	5961100000	181080000	202640000	49207000	358760000	420720000	317940000	487450000	259160000	210730000	231110000	31982000	254830000	172520000	157790000	187080000	227710000	141280000	378500000	258920000	228280000	405590000	235520000	252180000	267210000	75380000	219870000	189890000	223130000
P47963	P47963	60S ribosomal protein L13	Rpl13	24.305	5825700000	306800000	182610000	221320000	285090000	408030000	515440000	236800000	330980000	243020000	236110000	117690000	274000000	223460000	165640000	256360000	230990000	241470000	332200000	308950000	334540000	255990000	256610000	233060000	239850000	156130000	223680000	215800000	165850000
P68040	P68040	Guanine nucleotide-binding protein subunit beta-2-like 1;Guanine nucleotide-binding protein subunit beta-2-like 1, N-terminally processed	Gnb2l1	35.076	5817600000	133040000	129840000	93593000	161010000	434320000	373140000	244720000	245740000	206350000	225790000	134910000	300050000	270810000	359980000	151730000	151150000	138890000	204190000	283680000	263370000	263860000	219270000	209740000	225390000	199920000	290020000	223820000	307620000
Q99LF4	Q99LF4	tRNA-splicing ligase RtcB homolog	Rtcb	55.249	5752300000	265960000	156390000	151140000	149020000	373230000	400720000	242160000	235190000	229010000	177510000	162180000	243880000	328640000	284070000	238110000	210030000	207880000	210140000	229190000	236520000	263250000	240430000	248990000	269580000	246040000	195300000	252490000	244040000
Q6NS46	Q6NS46	Protein RRP5 homolog	Pdcd11	207.78	5748300000	185550000	161010000	111540000	267820000	424490000	322570000	401410000	269090000	242430000	202410000	46724000	246050000	175410000	147540000	205300000	228550000	172250000	363830000	299400000	230920000	374580000	258370000	256130000	251290000	87504000	175030000	153510000	163680000
Q91VR5	Q91VR5	ATP-dependent RNA helicase DDX1	Ddx1	82.499	5746400000	207250000	120570000	153670000	165590000	314400000	466580000	191230000	224470000	240840000	235940000	144470000	358880000	324070000	340900000	211540000	185470000	212430000	235560000	205660000	268110000	229250000	242720000	243630000	246880000	202820000	280290000	270780000	283670000
O35658	O35658	Complement component 1 Q subcomponent-binding protein, mitochondrial	C1qbp	31.013	5722100000	361330000	235680000	215670000	125220000	249900000	250630000	331950000	283440000	251970000	234150000	314380000	223430000	252300000	209630000	287990000	309800000	268770000	155370000	181060000	160140000	334440000	262300000	225080000	214370000	434060000	191840000	223940000	211550000
P97855	P97855	Ras GTPase-activating protein-binding protein 1	G3bp1	51.828	5674200000	257210000	225190000	105960000	93389000	404980000	220210000	160860000	221870000	245100000	202930000	310320000	340810000	453320000	257570000	215770000	277440000	182260000	132010000	272610000	136980000	188170000	204560000	243700000	228980000	381580000	297990000	387220000	245610000
P70372	P70372	ELAV-like protein 1	Elavl1	36.169	5657400000	306910000	233310000	154760000	184920000	318850000	366300000	200850000	234230000	289690000	232380000	209560000	258140000	257620000	253530000	270100000	223970000	182020000	228600000	234620000	264500000	214420000	222850000	267260000	236450000	276450000	228580000	251370000	238470000
Q6ZWY3	Q6ZWY3	40S ribosomal protein S27-like	Rps27l	9.4771	5649500000	255250000	187450000	244750000	220280000	433360000	282810000	183580000	237190000	143570000	250640000	135150000	278890000	272190000	238900000	165060000	196810000	254360000	206880000	270700000	319360000	326450000	180900000	233780000	286600000	126480000	185450000	202950000	203460000
P63168;Q80ZS7;Q9D0M5	P63168;Q80ZS7	Dynein light chain 1, cytoplasmic	Dynll1;BC048507	10.366	5618500000	291230000	207840000	204340000	148050000	396640000	431760000	338690000	107890000	286170000	142370000	177530000	258710000	264190000	227050000	326370000	166500000	223540000	147200000	316570000	244750000	359350000	162520000	254480000	265300000	200770000	246050000	243760000	223130000
O55135	O55135	Eukaryotic translation initiation factor 6	Eif6	26.511	5561100000	217540000	242510000	125230000	170280000	427130000	345050000	250940000	225950000	202250000	125380000	113720000	275510000	173590000	126010000	213150000	276120000	188100000	213750000	265790000	262180000	317910000	218360000	215400000	183070000	151580000	180290000	156490000	166620000
Q9WTM5	Q9WTM5	RuvB-like 2	Ruvbl2	51.112	5545400000	242780000	187550000	155110000	138380000	284640000	273960000	169880000	226790000	241510000	199230000	109600000	261770000	247300000	210820000	271980000	227750000	185190000	214530000	208820000	180890000	186810000	233690000	238920000	229490000	184880000	227150000	207540000	205260000
Q9CU62	Q9CU62	Structural maintenance of chromosomes protein 1A	Smc1a	143.23	5522000000	201760000	210610000	292030000	139450000	367240000	390720000	241970000	226630000	200410000	225330000	75133000	170080000	247510000	200840000	225230000	264890000	313610000	197140000	208990000	230260000	215230000	221070000	235920000	244590000	183520000	198980000	228410000	197930000
Q9CR57	Q9CR57	60S ribosomal protein L14	Rpl14	23.564	5519800000	229160000	106040000	172280000	243610000	417950000	577500000	218980000	235140000	261700000	172400000	63776000	163310000	159960000	151120000	181720000	137210000	224700000	277020000	275740000	340440000	277220000	191820000	255270000	200860000	119870000	152620000	141950000	158470000
Q9CQI6	Q9CQI6	Coactosin-like protein	Cotl1	15.944	5516000000	242810000	172310000	201960000	214920000	427110000	425650000	312040000	184630000	149920000	202550000	52152000	118410000	52640000	101270000	226320000	219050000	272200000	284420000	300700000	270960000	294810000	208670000	211880000	221390000	110730000	100760000	86712000	109930000
P57776	P57776	Elongation factor 1-delta	Eef1d	31.293	5506300000	131830000	94417000	145700000	160060000	361960000	310620000	224300000	274340000	207130000	210000000	135810000	191200000	203650000	190030000	137890000	153260000	191070000	213970000	292760000	185150000	209810000	246670000	208410000	218280000	205900000	176040000	185610000	195260000
Q8BHD7;B2RU80	Q8BHD7	Polypyrimidine tract-binding protein 3	Ptbp3	56.7	5493000000	155660000	180650000	273340000	235530000	442150000	693090000	289250000	142450000	291610000	302360000	70240000	261320000	166010000	203590000	193060000	177820000	240060000	278800000	298810000	355980000	265200000	204370000	251490000	270710000	101310000	218730000	219530000	223120000
Q99020	Q99020	Heterogeneous nuclear ribonucleoprotein A/B	Hnrnpab	30.831	5473200000	210550000	160000000	202840000	134650000	371660000	412510000	232000000	267130000	224430000	230960000	203180000	287940000	366440000	249830000	225950000	259100000	267620000	176230000	242270000	296000000	259750000	234160000	218410000	240250000	269390000	255070000	338730000	248200000
O70201	O70201	Baculoviral IAP repeat-containing protein 5	Birc5	16.297	5408600000	394740000	168100000	134990000	155840000	190220000	225150000	155720000	242360000	174050000	165430000	292790000	331180000	235110000	255220000	274150000	204220000	151310000	166170000	129830000	133100000	165260000	208590000	151520000	160740000	297740000	249810000	190090000	233270000
Q99K48	Q99K48	Non-POU domain-containing octamer-binding protein	Nono	54.54	5402200000	185490000	176300000	200890000	193840000	356610000	328550000	240160000	248340000	284120000	250440000	137780000	173620000	270240000	196440000	174630000	236070000	213470000	149580000	308870000	173110000	201800000	206550000	219840000	195630000	201420000	144200000	196900000	170030000
P97310	P97310	DNA replication licensing factor MCM2	Mcm2	102.08	5361900000	134450000	120430000	187370000	195820000	390020000	447470000	215150000	228150000	202500000	228980000	53217000	147410000	103390000	129960000	179760000	161830000	213040000	285460000	270340000	273370000	219080000	223080000	220820000	242470000	108430000	154220000	127110000	154870000
P60867	P60867	40S ribosomal protein S20	Rps20	13.373	5349100000	381450000	162140000	187590000	185910000	291310000	344520000	270050000	84334000	199910000	228610000	70843000	228460000	302980000	259420000	250130000	196720000	213010000	225210000	232480000	252340000	234510000	206490000	231100000	240020000	253100000	214100000	244210000	220180000
Q8CH18	Q8CH18	Cell division cycle and apoptosis regulator protein 1	Ccar1	132.06	5290000000	643640000	235590000	343400000	39591000	51983000	77571000	42409000	427580000	399610000	30368000	386760000	814520000	28677000	28258000	429570000	259260000	410880000	103690000	140590000	159290000	132940000	278690000	227110000	129590000	1032000000	242860000	72087000	68738000
Q9EST5	Q9EST5	Acidic leucine-rich nuclear phosphoprotein 32 family member B	Anp32b	31.078	5277600000	280220000	175170000	152110000	209610000	344500000	410160000	279290000	258910000	217050000	168830000	103060000	167750000	184860000	167430000	282420000	210100000	201590000	284520000	264870000	298280000	279710000	242920000	223190000	193090000	144780000	155170000	169630000	174970000
Q9JJA4	Q9JJA4	Ribosome biogenesis protein WDR12	Wdr12	47.346	5272500000	271290000	207930000	119160000	212890000	373910000	322880000	347560000	234970000	210530000	165860000	86951000	207980000	129660000	131120000	275710000	220110000	169110000	253530000	233160000	227400000	298470000	218670000	192190000	214520000	163350000	176660000	152620000	137550000
Q9CPN8;O88477;Q5SF07	Q9CPN8	Insulin-like growth factor 2 mRNA-binding protein 3	Igf2bp3	63.574	5264700000	359540000	279130000	229580000	224000000	436200000	427860000	275510000	256550000	196450000	181730000	12230000	9265300	10279000	15826000	282580000	384280000	374160000	345510000	275710000	286940000	335830000	182030000	198260000	201260000	4608700	11929000	13409000	21025000
Q921M3	Q921M3	Splicing factor 3B subunit 3	Sf3b3	135.55	5264000000	266160000	181060000	206310000	79913000	317930000	314930000	169010000	248410000	185400000	185630000	177700000	368810000	293490000	248810000	268290000	247700000	266140000	150100000	194860000	221300000	198120000	204460000	218480000	225740000	225020000	272860000	265550000	275990000
Q03265	Q03265	ATP synthase subunit alpha, mitochondrial	Atp5a1	59.752	5256700000	129770000	114050000	168910000	101120000	258450000	344920000	238260000	231980000	193500000	224380000	127120000	290140000	440880000	351720000	136610000	146680000	212610000	135170000	173270000	253530000	258570000	212750000	212820000	218460000	156110000	205450000	328230000	243260000
Q9R0Q7	Q9R0Q7	Prostaglandin E synthase 3	Ptges3	18.721	5243400000	272900000	123370000	156070000	264560000	313190000	392880000	205970000	306320000	199950000	135590000	87142000	176010000	180790000	179840000	246780000	195300000	228380000	311870000	247400000	303790000	222270000	220420000	161400000	155340000	153530000	174350000	199090000	199150000
Q3TVW5	Q3TVW5	Trichoplein keratin filament-binding protein	Tchp	60.642	5204500000	773230000	0	296130000	445800000	0	0	0	814100000	0	217030000	743680000	0	1602000	428500000	267330000	0	453940000	435590000	0	0	0	363480000	0	321480000	403650000	0	36218000	497870000
Q61990;P57722	Q61990	Poly(rC)-binding protein 2	Pcbp2	38.221	5081300000	232500000	142960000	154110000	256580000	320480000	475380000	250950000	183820000	189100000	171950000	78598000	164990000	183270000	124690000	216230000	173520000	191650000	312630000	235140000	326680000	286880000	192780000	193850000	207260000	122770000	148760000	177830000	168080000
Q05D44	Q05D44	Eukaryotic translation initiation factor 5B	Eif5b	137.61	5056500000	337520000	45062000	300890000	39804000	177730000	390410000	208560000	216400000	206280000	182290000	64434000	412830000	335800000	309370000	287840000	142800000	324390000	111080000	149880000	239640000	185870000	234350000	211000000	219700000	138460000	331320000	276360000	286510000
P34022	P34022	Ran-specific GTPase-activating protein	Ranbp1	23.596	5035400000	101890000	116050000	200020000	137970000	352990000	291760000	234260000	191660000	222760000	216830000	131690000	199210000	169950000	150700000	143690000	186070000	220390000	224320000	252670000	207570000	190730000	226290000	212950000	227060000	185620000	169730000	155680000	201510000
Q8R2M2	Q8R2M2	Deoxynucleotidyltransferase terminal-interacting protein 2	Dnttip2	84.276	5028200000	222340000	252850000	125340000	156680000	314410000	251230000	265690000	179690000	234710000	191030000	112220000	198780000	164970000	167890000	201590000	257100000	160340000	209610000	225620000	138920000	244850000	181820000	204990000	228810000	245420000	236670000	213040000	216250000
P34884	P34884	Macrophage migration inhibitory factor	Mif	12.504	5013600000	73094000	150280000	97634000	133190000	316630000	201490000	269120000	158960000	186670000	223410000	324890000	387030000	432900000	322180000	104280000	134170000	115720000	144620000	177510000	170180000	302590000	188940000	194790000	226330000	364370000	306250000	300430000	418650000
Q9CZM2	Q9CZM2	60S ribosomal protein L15	Rpl15	24.146	4992600000	200550000	138710000	123280000	234070000	398140000	453400000	210100000	204590000	199430000	146690000	84212000	198160000	203650000	124970000	201200000	168100000	149900000	316890000	286670000	313340000	208930000	199220000	187440000	157230000	133780000	174350000	183100000	148730000
Q80WJ7	Q80WJ7	Protein LYRIC	Mtdh	63.845	4991900000	258640000	216480000	196600000	72225000	209860000	281590000	170190000	197820000	250770000	162180000	325790000	406330000	335160000	288100000	247450000	284820000	225790000	172300000	150130000	183890000	177620000	224000000	202110000	186940000	477550000	330810000	268570000	263430000
Q99LE6	Q99LE6	ATP-binding cassette sub-family F member 2	Abcf2	71.781	4976000000	221390000	132920000	157900000	152940000	272930000	365320000	242690000	230430000	198990000	196980000	30921000	268580000	241320000	207870000	173910000	151520000	169160000	187170000	178390000	237910000	258990000	189530000	183700000	210690000	86960000	206110000	197460000	213820000
P63158	P63158	High mobility group protein B1	Hmgb1	24.893	4925700000	205540000	122580000	167860000	130740000	257010000	400410000	195820000	243120000	221430000	198610000	289240000	309780000	288980000	319100000	151740000	241710000	268900000	175760000	162340000	254800000	199760000	172150000	195910000	195430000	366890000	252570000	253990000	313340000
Q02053;P31254	Q02053	Ubiquitin-like modifier-activating enzyme 1	Uba1	117.81	4894200000	94907000	36374000	99886000	196690000	400230000	299070000	149470000	234710000	201290000	208750000	50040000	162120000	169190000	171280000	117490000	112290000	158700000	218220000	244130000	205370000	171180000	205270000	196950000	217910000	120050000	148370000	149850000	175970000
Q1HFZ0	Q1HFZ0	tRNA (cytosine(34)-C(5))-methyltransferase	Nsun2	85.451	4893900000	227420000	128410000	166400000	254630000	347350000	334650000	247440000	235070000	170220000	157300000	69196000	173460000	141200000	126170000	194530000	181330000	226970000	254780000	199520000	247050000	261610000	199350000	193300000	203060000	115240000	129670000	154080000	164060000
Q9D0T1	Q9D0T1	NHP2-like protein 1;NHP2-like protein 1, N-terminally processed	Nhp2l1	14.173	4877500000	191980000	236920000	105840000	279880000	368340000	282300000	248300000	192170000	197720000	182830000	173160000	157560000	156190000	121450000	186030000	264980000	167390000	337900000	290870000	202640000	265490000	185520000	226820000	235250000	216860000	154040000	147000000	160010000
P62334	P62334	26S protease regulatory subunit 10B	Psmc6	44.172	4875000000	121070000	105340000	180420000	184400000	368610000	360810000	233010000	164430000	199620000	219190000	44825000	121700000	167690000	155930000	145070000	158570000	214830000	242860000	252550000	185950000	217220000	156810000	194090000	198760000	99421000	136660000	159230000	150440000
Q9Z1N5	Q9Z1N5	Spliceosome RNA helicase Ddx39b	Ddx39b	49.035	4870200000	136840000	118930000	110150000	187540000	341390000	375530000	153870000	175350000	228400000	215060000	52281000	129050000	215360000	124260000	104490000	142030000	161230000	203010000	213960000	219320000	172320000	161240000	168680000	192790000	86676000	115010000	162010000	113130000
Q3TXS7	Q3TXS7	26S proteasome non-ATPase regulatory subunit 1	Psmd1	105.73	4848500000	142820000	92843000	167830000	166740000	334100000	277840000	159960000	188680000	171000000	171900000	58033000	148180000	185410000	136840000	161670000	162110000	191230000	223460000	226280000	188550000	169400000	178490000	188060000	199780000	124420000	132950000	172610000	152720000
Q8BU30	Q8BU30	Isoleucine--tRNA ligase, cytoplasmic	Iars	144.27	4834200000	122980000	87930000	74278000	120440000	392900000	329070000	206480000	173480000	170900000	170810000	48060000	224370000	233470000	140140000	122640000	108060000	149060000	223580000	251130000	221540000	194940000	194160000	197930000	181920000	116440000	187090000	194190000	164010000
O88685	O88685	26S protease regulatory subunit 6A	Psmc3	49.548	4811400000	129650000	128160000	174240000	252490000	321160000	287030000	217610000	202990000	216800000	207140000	53118000	109610000	137470000	129520000	139220000	146390000	208580000	274320000	215340000	168800000	204640000	169390000	200130000	192310000	104150000	111490000	132440000	128410000
Q8R0A0	Q8R0A0	General transcription factor IIF subunit 2	Gtf2f2	28.381	4797800000	227960000	64279000	233210000	24057000	193300000	339810000	150870000	168650000	218300000	177930000	186750000	494330000	315680000	290750000	295980000	126460000	281600000	63356000	136690000	229910000	154620000	216450000	206430000	201840000	228990000	382300000	324900000	313080000
P35980	P35980	60S ribosomal protein L18	Rpl18	21.644	4796700000	143110000	129830000	166920000	243000000	378770000	381710000	243150000	210140000	214530000	207350000	66781000	158270000	163010000	125070000	168200000	163240000	209810000	295390000	265750000	269670000	241530000	185830000	205000000	217180000	125610000	138900000	154560000	130280000
Q922B2	Q922B2	Aspartate--tRNA ligase, cytoplasmic	Dars	57.147	4773200000	101280000	87432000	131530000	158960000	340010000	332920000	233580000	193110000	198690000	199680000	41013000	152470000	204950000	186250000	106890000	110150000	169060000	246040000	232370000	215280000	229470000	209010000	186550000	206010000	99799000	162410000	176050000	168280000
Q9D8N0	Q9D8N0	Elongation factor 1-gamma	Eef1g	50.06	4768400000	83311000	67066000	112120000	128530000	351710000	232030000	191930000	142340000	203310000	176690000	93681000	170020000	216930000	193660000	114090000	99172000	142340000	168320000	252870000	157380000	195990000	197730000	202040000	202390000	136710000	171850000	203000000	182260000
P62843	P62843	40S ribosomal protein S15	Rps15	17.04	4767700000	262040000	193990000	227610000	143750000	320290000	420270000	117660000	228860000	182400000	135040000	237240000	166080000	183580000	163880000	188800000	133800000	208560000	143510000	136580000	165850000	180040000	117550000	148650000	119810000	193050000	89399000	121830000	124640000
P30681	P30681	High mobility group protein B2	Hmgb2	24.162	4767500000	93438000	128180000	199210000	39699000	111680000	288520000	287840000	64538000	215820000	275740000	388410000	404320000	435100000	533590000	168140000	154570000	222740000	101160000	133450000	181480000	257450000	162440000	170840000	244070000	489860000	309110000	316580000	414200000
P06151;P00342;P16125	P06151	L-lactate dehydrogenase A chain	Ldha	36.498	4752400000	74614000	107080000	119890000	75864000	123890000	170990000	316470000	223380000	222670000	202860000	197930000	453310000	515810000	637880000	100290000	139120000	149110000	110380000	99777000	139530000	303530000	209070000	210930000	214600000	291410000	449230000	427510000	538990000
Q01853	Q01853	Transitional endoplasmic reticulum ATPase	Vcp	89.321	4750800000	156840000	150050000	176430000	76979000	222430000	300120000	261780000	206660000	166060000	141840000	203570000	321320000	299900000	323010000	160010000	210330000	209580000	108070000	172150000	186130000	283380000	185090000	185800000	187070000	266230000	235010000	237310000	281460000
P46471	P46471	26S protease regulatory subunit 7	Psmc2	48.647	4748500000	133740000	88418000	138870000	204360000	312270000	312430000	185410000	202420000	193000000	183680000	53603000	126270000	199210000	149460000	115040000	134090000	202490000	243990000	214570000	185460000	188690000	194960000	187740000	197640000	105600000	135010000	176090000	157730000
Q8K019	Q8K019	Bcl-2-associated transcription factor 1	Bclaf1	106	4715100000	319780000	295290000	278970000	54571000	260570000	371180000	181380000	205420000	246700000	159340000	267840000	267780000	270900000	184110000	302920000	348430000	315770000	106900000	174300000	225440000	175670000	199630000	214650000	208990000	368260000	244320000	251170000	194140000
Q6ZQ58	Q6ZQ58	La-related protein 1	Larp1	121.12	4691300000	269490000	189580000	140170000	118560000	334830000	206340000	158360000	184160000	195430000	174390000	212720000	255430000	291820000	147510000	254060000	240360000	217760000	163540000	219600000	164800000	180700000	194380000	198470000	211600000	301130000	209770000	234300000	158810000
Q9JKF1	Q9JKF1	Ras GTPase-activating-like protein IQGAP1	Iqgap1	188.74	4671500000	88953000	87743000	113960000	89898000	321740000	348850000	147040000	179510000	199170000	215560000	82082000	208150000	347100000	203130000	112750000	130460000	175400000	154730000	206930000	202450000	166330000	190240000	198150000	189100000	146880000	195200000	261830000	203770000
P37913	P37913	DNA ligase 1	Lig1	102.29	4657100000	175340000	139430000	256520000	251920000	351790000	493690000	243480000	155880000	182750000	189490000	4444400	73386000	100620000	62127000	227240000	198670000	310310000	307800000	214580000	319690000	243580000	177040000	178290000	197850000	5476100	96252000	94704000	94387000
P62717	P62717	60S ribosomal protein L18a	Rpl18a	20.732	4652000000	138730000	140650000	137310000	207750000	383910000	369330000	133540000	143320000	225650000	182200000	102510000	156190000	162770000	78731000	138080000	123830000	176730000	320730000	244670000	256300000	210980000	161340000	188880000	203490000	117360000	122220000	143550000	126430000
Q8BFR5	Q8BFR5	Elongation factor Tu, mitochondrial	Tufm	49.508	4630500000	199760000	138510000	228390000	181330000	197650000	392260000	268280000	176790000	212610000	216570000	79824000	160370000	232030000	227340000	201670000	177440000	230170000	231720000	152980000	239050000	223620000	188930000	202240000	213320000	162040000	152290000	184850000	200290000
Q640M1	Q640M1	U3 small nucleolar RNA-associated protein 14 homolog A	Utp14a	87.264	4623700000	179590000	280270000	128420000	140310000	423360000	248440000	322340000	156760000	149880000	185090000	60138000	109860000	89458000	82493000	205840000	267570000	185880000	266550000	228900000	153540000	261990000	182320000	195020000	192760000	132390000	107060000	101510000	93625000
P40630	P40630	Transcription factor A, mitochondrial	Tfam	27.987	4584800000	162120000	137360000	191010000	106620000	215920000	275850000	178530000	124890000	212410000	177400000	238790000	356330000	239760000	217980000	224510000	146040000	214670000	139970000	124360000	170930000	199740000	125580000	169840000	177230000	263740000	262870000	190540000	181940000
P63037	P63037	DnaJ homolog subfamily A member 1	Dnaja1	44.868	4571500000	185940000	180810000	202430000	159760000	337110000	289160000	126100000	124680000	213590000	200550000	99905000	159510000	172530000	137960000	231350000	215780000	210830000	205490000	214080000	184460000	189970000	190150000	203190000	199120000	159260000	153200000	171880000	164400000
P26039;Q71LX4	P26039	Talin-1	Tln1	269.82	4541800000	67947000	93348000	184410000	79288000	364010000	302110000	134950000	149730000	200330000	215870000	59914000	132000000	253310000	149730000	117480000	158280000	205230000	152220000	219690000	169070000	166240000	198460000	191900000	188620000	135050000	136630000	224840000	147940000
P41105	P41105	60S ribosomal protein L28	Rpl28	15.733	4498100000	154970000	112760000	132660000	230680000	309790000	349340000	241440000	167650000	208500000	229790000	75397000	129580000	151450000	139710000	142160000	135760000	153370000	319430000	242990000	249100000	232740000	230690000	180680000	212630000	109780000	96498000	144470000	137410000
A2AL36	A2AL36	Centriolin	Cntrl	268.88	4491400000	186010000	156560000	84040000	38430000	131480000	92674000	35479000	183880000	186730000	163960000	833980000	493140000	317180000	412960000	199690000	190250000	161580000	87231000	117980000	103370000	48198000	170480000	198510000	189340000	886430000	365520000	292940000	381100000
P61358	P61358	60S ribosomal protein L27	Rpl27	15.798	4475600000	254980000	121570000	140200000	180650000	331190000	379980000	220050000	228230000	210510000	167660000	97211000	134550000	166580000	113430000	234570000	164180000	197420000	269580000	221790000	250510000	248480000	215090000	201830000	194890000	144600000	128560000	173580000	136430000
P62855	P62855	40S ribosomal protein S26	Rps26	13.015	4468800000	152260000	183520000	136500000	199480000	243430000	287260000	186080000	227150000	208330000	198850000	104080000	154410000	159760000	161650000	134820000	236380000	174840000	249540000	239720000	192700000	187320000	193670000	214220000	219340000	135330000	139900000	148060000	165580000
Q3U1J4	Q3U1J4	DNA damage-binding protein 1	Ddb1	126.85	4467800000	279570000	264570000	203870000	76415000	189470000	197150000	116900000	157280000	178660000	180690000	161420000	255820000	213380000	232750000	232500000	265200000	267790000	134900000	124790000	148600000	121980000	169820000	198020000	192650000	270830000	223160000	212790000	224890000
Q99KP6	Q99KP6	Pre-mRNA-processing factor 19	Prpf19	55.238	4451000000	146220000	65809000	114690000	112320000	341760000	253560000	210620000	175610000	198990000	184850000	95029000	231830000	240540000	172420000	164680000	164800000	149050000	157340000	206590000	176110000	179190000	171100000	191780000	163200000	143710000	180430000	188080000	184160000
Q60749;Q9R226;Q9WU01	Q60749	KH domain-containing, RNA-binding, signal transduction-associated protein 1	Khdrbs1	48.37	4447800000	301290000	172270000	221000000	146290000	267720000	330900000	184820000	200600000	146940000	209190000	105290000	148570000	148550000	139130000	232000000	184160000	230830000	152890000	151910000	212480000	157450000	150710000	146310000	170760000	113160000	112390000	121600000	125350000
Q9JHJ0	Q9JHJ0	Tropomodulin-3	Tmod3	39.502	4417700000	223810000	197640000	143290000	64809000	161040000	207900000	126630000	181570000	166270000	153950000	487780000	221190000	215740000	335520000	198300000	224870000	190060000	120980000	153040000	137530000	117710000	186090000	158820000	196170000	602160000	187180000	195510000	225930000
Q9JIX8	Q9JIX8	Apoptotic chromatin condensation inducer in the nucleus	Acin1	150.72	4408600000	243540000	180060000	282810000	53869000	270240000	380500000	132190000	225550000	177380000	160520000	201360000	228120000	214890000	184710000	254590000	255750000	311700000	115700000	171120000	226540000	147920000	188140000	191010000	192400000	304260000	198990000	199780000	180440000
Q8VDM6	Q8VDM6	Heterogeneous nuclear ribonucleoprotein U-like protein 1	Hnrnpul1	96.001	4399000000	296890000	154430000	188820000	100460000	227280000	422320000	173540000	212150000	159250000	149640000	246660000	222660000	259030000	195630000	246950000	233810000	246180000	131580000	166820000	257770000	160580000	188040000	180650000	173710000	287910000	228290000	204600000	196300000
Q8BMJ2	Q8BMJ2	Leucine--tRNA ligase, cytoplasmic	Lars	134.19	4379900000	90536000	62667000	72562000	155160000	353740000	265220000	199860000	136310000	165480000	189840000	41374000	153810000	153950000	155340000	111890000	100820000	131170000	241620000	220230000	182700000	194500000	171220000	192400000	183320000	88565000	139770000	152810000	141620000
Q7TQH0	Q7TQH0	Ataxin-2-like protein	Atxn2l	110.65	4352300000	312940000	179570000	116960000	81957000	187670000	233630000	109580000	181290000	223990000	185760000	458480000	220500000	288730000	197300000	291690000	253170000	166520000	118310000	164810000	142280000	124120000	183690000	192160000	190530000	511210000	198220000	229190000	215210000
O55128	O55128	Histone deacetylase complex subunit SAP18	Sap18	17.595	4350700000	197120000	225400000	227660000	99594000	232530000	380200000	197030000	198950000	177350000	177250000	125660000	143700000	174930000	166910000	189700000	218890000	236550000	133980000	170810000	248990000	164860000	196150000	149020000	156460000	202050000	137480000	143990000	129300000
Q99MN1	Q99MN1	Lysine--tRNA ligase	Kars	67.839	4346900000	157310000	103340000	159850000	85957000	255090000	198570000	281750000	171640000	166840000	217780000	54838000	233620000	248420000	162280000	165000000	146520000	179820000	150670000	176490000	157020000	227060000	175740000	168690000	191330000	137760000	180530000	235410000	169820000
P11103	P11103	Poly [ADP-ribose] polymerase 1	Parp1	113.1	4338400000	272420000	74381000	185500000	65388000	166800000	345180000	139030000	172580000	170490000	144860000	142570000	280250000	334160000	313420000	252190000	112570000	205810000	101160000	136980000	227390000	139140000	192940000	203700000	171720000	207820000	271560000	256490000	256530000
Q08288	Q08288	Cell growth-regulating nucleolar protein	Lyar	43.735	4326200000	231210000	215440000	189550000	143900000	298470000	230930000	132530000	203750000	178140000	171930000	187110000	161970000	171720000	180010000	239520000	234760000	237730000	187000000	215090000	169960000	132180000	196850000	171160000	187130000	269070000	154430000	172240000	149260000
Q6RT24	Q6RT24	Centromere-associated protein E	Cenpe	286.52	4321600000	283500000	212540000	175150000	141640000	260960000	217610000	138830000	166530000	167990000	164680000	217660000	186510000	113910000	121620000	214930000	254520000	225750000	206330000	172830000	146200000	147110000	173050000	195320000	190390000	274190000	164890000	130510000	142990000
Q3UMU9	Q3UMU9	Hepatoma-derived growth factor-related protein 2	Hdgfrp2	74.29	4257300000	299390000	250940000	313980000	45630000	160170000	244060000	105190000	128070000	176930000	155080000	210400000	195890000	251020000	171870000	253950000	262050000	350460000	116670000	134180000	161520000	136070000	162580000	171170000	189790000	290670000	198910000	243400000	180020000
P62880;P29387	P62880	Guanine nucleotide-binding protein G(I)/G(S)/G(T) subunit beta-2	Gnb2	37.331	4254900000	245880000	149340000	79380000	88664000	240930000	229030000	128510000	174170000	154580000	140000000	138970000	295360000	361210000	320620000	180420000	195810000	114470000	120990000	171340000	149650000	135520000	177660000	178900000	158480000	212350000	248500000	291480000	313210000
P62137	P62137	Serine/threonine-protein phosphatase PP1-alpha catalytic subunit	Ppp1ca	37.54	4253700000	268600000	118940000	120800000	132120000	275640000	291570000	147840000	202850000	157940000	137750000	171140000	230310000	268330000	255960000	206440000	155750000	159820000	143670000	171130000	205900000	164610000	195190000	159770000	175660000	225980000	216570000	216120000	230370000
Q8K363	Q8K363	ATP-dependent RNA helicase DDX18	Ddx18	74.18	4238800000	134710000	135910000	85178000	210550000	311470000	350860000	235450000	162360000	98834000	145550000	21080000	277820000	122260000	102940000	147800000	155800000	115620000	247510000	214490000	187280000	252190000	178350000	159110000	183980000	53186000	177020000	136250000	162550000
P27773	P27773	Protein disulfide-isomerase A3	Pdia3	56.678	4201000000	81556000	95980000	108520000	37876000	142560000	179840000	283860000	218710000	194300000	168000000	285820000	408400000	366290000	468790000	92964000	151200000	142710000	84105000	113860000	112190000	262220000	194870000	197420000	182650000	341980000	300350000	304090000	394660000
Q6URW6	Q6URW6	Myosin-14	Myh14	228.58	4187800000	257150000	224540000	106050000	67610000	156850000	188530000	77014000	188260000	200760000	155030000	247250000	334080000	297250000	253660000	264800000	255040000	129610000	93943000	119730000	127500000	77235000	188520000	212210000	180280000	353890000	318330000	291190000	267700000
Q5F2E7	Q5F2E7	Nuclear fragile X mental retardation-interacting protein 2	Nufip2	75.656	4152500000	262300000	216720000	116050000	45620000	176520000	159390000	96716000	211430000	169770000	161360000	505990000	241770000	240650000	173180000	282860000	268600000	168000000	89116000	137750000	129490000	109270000	182740000	183570000	183160000	550420000	221840000	229020000	198740000
P35700	P35700	Peroxiredoxin-1	Prdx1	22.176	4118900000	114220000	132580000	117210000	85159000	174900000	284230000	292660000	125450000	135050000	172700000	158360000	217900000	252520000	172970000	143700000	187290000	158100000	128520000	152910000	159900000	243220000	164640000	156520000	195710000	193040000	176550000	173580000	223170000
Q922S4	Q922S4	cGMP-dependent 3,5-cyclic phosphodiesterase	Pde2a	105.62	4113400000	244390000	117820000	142650000	40044000	176620000	413640000	130190000	216140000	152570000	126020000	166570000	268280000	508200000	250160000	223950000	156910000	182000000	58864000	125140000	218820000	146580000	184110000	188310000	185770000	231940000	229510000	414010000	275110000
Q9DBE9	Q9DBE9	pre-rRNA processing protein FTSJ3	Ftsj3	95.531	4095100000	113720000	131170000	102600000	203360000	333900000	254390000	275440000	177830000	175210000	140700000	29064000	188970000	135650000	131240000	151560000	209470000	129980000	211900000	217770000	171800000	254840000	179940000	175290000	167340000	70630000	161900000	127470000	147450000
P50247	P50247	Adenosylhomocysteinase	Ahcy	47.688	4092200000	122970000	74449000	123620000	153120000	305260000	287760000	185010000	194770000	140020000	159120000	38364000	146140000	134140000	141720000	114250000	102400000	142820000	218090000	185390000	197220000	180460000	171050000	149900000	154540000	67264000	131670000	125890000	135140000
P05202	P05202	Aspartate aminotransferase, mitochondrial	Got2	47.411	4088700000	193180000	207750000	44385000	363490000	108690000	70035000	47287000	285960000	188680000	149300000	140320000	546330000	334620000	187960000	47692000	117820000	103070000	50119000	69268000	221250000	334060000	178200000	159990000	173210000	232330000	376190000	330740000	538200000
Q9CWK8	Q9CWK8	Sorting nexin-2	Snx2	58.47	4061900000	104840000	115230000	180430000	91056000	223700000	285420000	168550000	165450000	127980000	146950000	137510000	174910000	201030000	197370000	131140000	144490000	195540000	144010000	171580000	191540000	190660000	164430000	158370000	170640000	169770000	152730000	186580000	192130000
Q9D883;Q8BGJ9	Q9D883	Splicing factor U2AF 35 kDa subunit	U2af1	27.815	3999500000	244960000	172870000	83391000	93941000	354460000	261170000	134970000	119050000	169800000	181800000	120720000	145950000	142600000	112790000	198150000	148370000	139840000	134990000	192680000	166390000	153300000	139680000	141620000	172430000	169050000	97037000	123690000	86845000
P32067	P32067	Lupus La protein homolog	Ssb	47.756	3993300000	149330000	109570000	186520000	155020000	299330000	405460000	171520000	192820000	134790000	129030000	17989000	120000000	95357000	53937000	139330000	186020000	210240000	202120000	227710000	216820000	165530000	176170000	156340000	150540000	60581000	102790000	102380000	80913000
Q8C2Q3	Q8C2Q3	RNA-binding protein 14	Rbm14	69.448	3986900000	166810000	159300000	123240000	143390000	252740000	371640000	202640000	162690000	172600000	151350000	130820000	193430000	219770000	155330000	174380000	219030000	165760000	171900000	225230000	209010000	196770000	159620000	182540000	180430000	172240000	169700000	183930000	169350000
Q8VDM4	Q8VDM4	26S proteasome non-ATPase regulatory subunit 2	Psmd2	100.2	3951500000	142390000	99673000	132070000	120970000	269280000	239610000	170710000	164460000	175720000	150830000	35411000	119100000	167840000	124660000	144750000	131060000	161740000	172850000	185260000	172550000	164260000	180030000	167650000	168410000	75248000	111530000	147250000	130900000
P16045	P16045	Galectin-1	Lgals1	14.866	3948000000	87878000	124620000	69509000	133760000	270670000	169130000	229940000	136210000	147600000	146480000	50675000	64504000	77203000	95692000	92655000	123950000	95237000	181990000	200940000	141310000	241770000	125170000	150850000	157970000	83633000	72817000	70232000	91690000
Q99L45	Q99L45	Eukaryotic translation initiation factor 2 subunit 2	Eif2s2	38.092	3943600000	181540000	98673000	158640000	63386000	240410000	235160000	188650000	164190000	179820000	158820000	57042000	205600000	225600000	171570000	179620000	128750000	183550000	115640000	151350000	149110000	170590000	181890000	169340000	164360000	141160000	165770000	190200000	159000000
Q8BFZ3	Q8BFZ3	Beta-actin-like protein 2	Actbl2	42.004	3936000000	0	0	0	0	0	0	0	0	0	5234600	0	0	3926000000	0	0	0	0	0	0	0	0	0	0	5911400	0	0	3734800000	0
P84099	P84099	60S ribosomal protein L19	Rpl19	23.466	3924800000	130480000	141740000	237970000	149590000	270550000	558640000	139040000	118180000	141650000	179600000	62675000	137620000	205320000	125000000	127460000	186980000	208710000	229080000	204670000	332310000	158340000	140980000	150610000	177300000	102850000	128600000	162250000	124540000
Q99K85	Q99K85	Phosphoserine aminotransferase	Psat1	40.472	3923000000	53658000	52434000	50029000	124430000	350240000	177430000	122600000	132530000	167680000	171710000	53139000	126250000	109680000	144910000	69553000	84694000	110210000	162250000	216660000	116590000	111050000	148800000	166670000	151640000	112970000	131240000	113660000	144630000
Q9Z1Z2	Q9Z1Z2	Serine-threonine kinase receptor-associated protein	Strap	38.442	3913600000	158780000	106620000	149800000	95502000	283600000	311200000	190960000	199200000	140890000	141000000	77994000	117250000	99869000	123530000	148610000	132510000	186560000	173540000	196860000	184320000	194460000	157900000	154540000	154590000	120390000	110840000	112410000	122470000
Q9Z1Q9	Q9Z1Q9	Valine--tRNA ligase	Vars	140.21	3905500000	59288000	61755000	106290000	101930000	354330000	324740000	137600000	142010000	154280000	193510000	24145000	127420000	148430000	133140000	82608000	90359000	145080000	152640000	211930000	191950000	158050000	135340000	175680000	174790000	79339000	133340000	148460000	131920000
Q9DAW9;Q08091;Q08093	Q9DAW9	Calponin-3	Cnn3	36.428	3898800000	94039000	107980000	66962000	215650000	334940000	148730000	300860000	155050000	169710000	172210000	25975000	28334000	63912000	95285000	107780000	121180000	111440000	317530000	187880000	111890000	263780000	136610000	161470000	175750000	61070000	58890000	76149000	89568000
P67984	P67984	60S ribosomal protein L22	Rpl22	14.759	3880900000	203350000	158190000	168870000	103440000	247500000	261680000	149740000	139270000	166830000	142280000	174290000	141060000	166050000	141960000	173860000	189430000	222920000	135490000	170600000	207650000	159260000	138530000	168160000	174230000	204500000	125850000	176220000	161140000
P58462;Q99JB6;P58463;Q9DBY0	P58462	Forkhead box protein P1	Foxp1	78.832	3868800000	265070000	108070000	187600000	78257000	167390000	256220000	103870000	165960000	164680000	138460000	335060000	258220000	226870000	216190000	244750000	173820000	220080000	139110000	123180000	203830000	116900000	151110000	161170000	162270000	386240000	211890000	207560000	200650000
P29351	P29351	Tyrosine-protein phosphatase non-receptor type 6	Ptpn6	67.558	3860800000	63110000	76787000	77463000	150710000	272370000	289060000	105680000	178330000	161880000	158770000	39925000	91687000	76132000	63883000	112350000	116970000	161940000	232200000	229200000	211810000	148870000	184100000	177170000	174980000	86103000	134860000	125080000	114100000
P97496	P97496	SWI/SNF complex subunit SMARCC1	Smarcc1	122.89	3837700000	176260000	94879000	142750000	51644000	121770000	233760000	146170000	190500000	130070000	138260000	157230000	300330000	290310000	300630000	206870000	148880000	184020000	100720000	115810000	153180000	135730000	167640000	158880000	158010000	203740000	250040000	211410000	216380000
Q8BGQ7	Q8BGQ7	Alanine--tRNA ligase, cytoplasmic	Aars	106.91	3837600000	79079000	43510000	84614000	128990000	374500000	274750000	132470000	152290000	141100000	149750000	51273000	108020000	134520000	111010000	87669000	91932000	139570000	154660000	197110000	139070000	133560000	147260000	155340000	161560000	95438000	118630000	110330000	136210000
Q8C4J7	Q8C4J7	Transducin beta-like protein 3	Tbl3	88.265	3824000000	149980000	134360000	70553000	174450000	277130000	185840000	193690000	160540000	167010000	143920000	26732000	117440000	111260000	77020000	162640000	156390000	100050000	228300000	184330000	136650000	215850000	166250000	165360000	152350000	49810000	130450000	100900000	111680000
Q6IRU2	Q6IRU2	Tropomyosin alpha-4 chain	Tpm4	28.467	3800400000	197270000	184040000	155790000	18492000	167480000	195860000	73741000	161070000	195910000	165010000	467300000	278640000	296810000	256770000	173720000	198290000	157940000	51249000	97565000	108870000	74722000	196310000	181600000	166850000	573880000	250130000	251640000	246670000
P13020	P13020	Gelsolin	Gsn	85.941	3749300000	107410000	121160000	133800000	259170000	278860000	270630000	186620000	148510000	144520000	137070000	14455000	43508000	50510000	57640000	132540000	175620000	176200000	216270000	225390000	203280000	214590000	170970000	147190000	166060000	39103000	66144000	58109000	69017000
Q8BLH7	Q8BLH7	HIRA-interacting protein 3	Hirip3	65.214	3713400000	163620000	56315000	235900000	37597000	149240000	271700000	101000000	147760000	159010000	154290000	104900000	329200000	326900000	300980000	160230000	93112000	265310000	99926000	119470000	168270000	123310000	153220000	161600000	166280000	156200000	277590000	294040000	292360000
Q8BG32	Q8BG32	26S proteasome non-ATPase regulatory subunit 11	Psmd11	47.436	3701600000	94702000	96757000	111440000	132480000	266510000	223040000	124440000	128380000	146150000	160860000	54510000	107530000	129920000	104880000	124640000	112590000	134420000	173140000	191070000	148030000	131340000	141250000	171660000	156340000	93426000	108030000	143290000	124690000
Q78PY7	Q78PY7	Staphylococcal nuclease domain-containing protein 1	Snd1	102.09	3696200000	103530000	37424000	104370000	104940000	226990000	338930000	180080000	168900000	133930000	150760000	42079000	182840000	192390000	198520000	134510000	96414000	146110000	152160000	149710000	192620000	155530000	145440000	149100000	158930000	97994000	161140000	165840000	170070000
Q9JJI8	Q9JJI8	60S ribosomal protein L38	Rpl38	8.2038	3696100000	172060000	150150000	109920000	126590000	236800000	270050000	196280000	160560000	157510000	155580000	101390000	125810000	131340000	118920000	164340000	187020000	148500000	175590000	170720000	187750000	204850000	158290000	168080000	167330000	147380000	121600000	137590000	134830000
Q9Z2N8;Q99MR0	Q9Z2N8	Actin-like protein 6A	Actl6a	47.447	3667200000	221220000	137680000	116990000	78751000	166400000	213320000	117090000	162840000	136220000	130200000	128060000	296520000	218260000	177910000	207420000	155100000	173590000	114490000	107450000	137690000	122000000	157140000	141160000	141220000	173750000	225630000	191250000	228160000
P80315	P80315	T-complex protein 1 subunit delta	Cct4	58.066	3658700000	46891000	39614000	50445000	122120000	368600000	225650000	133490000	156920000	160480000	143320000	21874000	42185000	134900000	59110000	70695000	82369000	101250000	161080000	209810000	147560000	162330000	145260000	156600000	139760000	55804000	79621000	126680000	88310000
Q99MD9	Q99MD9	Nuclear autoantigenic sperm protein	Nasp	83.953	3642200000	75160000	73055000	179210000	117870000	197700000	236220000	172900000	161670000	122400000	151040000	53341000	98209000	97762000	102870000	100610000	125890000	206520000	157080000	168860000	133090000	171440000	144430000	153900000	180040000	103800000	95327000	96250000	109620000
Q91W50	Q91W50	Cold shock domain-containing protein E1	Csde1	88.79	3641000000	94792000	100570000	106140000	166520000	280000000	260580000	165990000	111140000	169760000	136060000	30011000	104460000	116460000	165290000	125600000	138470000	141680000	215510000	174740000	170910000	187380000	162000000	155190000	160790000	80368000	116160000	98131000	109180000
Q9WUA3	Q9WUA3	ATP-dependent 6-phosphofructokinase, platelet type	Pfkp	85.454	3627700000	57167000	64293000	101290000	164670000	289560000	252300000	194010000	178260000	128940000	140320000	36301000	205920000	202280000	216190000	71020000	86521000	130570000	238910000	153680000	165700000	188230000	145310000	156640000	149480000	69561000	155460000	167610000	172660000
Q61699	Q61699	Heat shock protein 105 kDa	Hsph1	96.406	3553400000	164830000	136500000	75834000	176670000	245220000	219710000	189880000	145640000	136330000	127240000	37529000	135850000	105190000	127220000	136470000	111950000	133260000	216710000	179070000	158530000	206810000	148690000	154450000	154750000	83266000	124730000	105260000	135620000
P63028	P63028	Translationally-controlled tumor protein	Tpt1	19.462	3483000000	76401000	113960000	137950000	80181000	218550000	238420000	125190000	163030000	132930000	92610000	112900000	168650000	155040000	177550000	115120000	128720000	167060000	107480000	141130000	167720000	157670000	152050000	136780000	167680000	158250000	151730000	144560000	170580000
Q8BK64	Q8BK64	Activator of 90 kDa heat shock protein ATPase homolog 1	Ahsa1	38.117	3476200000	78932000	200360000	43151000	121990000	212420000	322720000	87760000	132090000	87995000	252730000	57622000	127110000	123620000	61107000	97167000	114880000	118350000	128540000	170100000	127470000	175020000	130840000	134700000	140370000	121830000	113650000	143150000	122890000
P26369	P26369	Splicing factor U2AF 65 kDa subunit	U2af2	53.516	3468700000	148160000	140860000	123870000	137770000	258420000	351650000	162060000	121210000	140580000	152630000	93088000	104810000	125760000	72594000	169380000	148490000	163280000	164790000	177070000	220140000	159300000	122290000	134450000	151400000	117360000	103120000	116730000	89858000
E9PWG6	E9PWG6		Ncapg	112.87	3464300000	137170000	75140000	99999000	180150000	228810000	262560000	114060000	135600000	142790000	154040000	51423000	179200000	146880000	162660000	157330000	119220000	113640000	217370000	151120000	163950000	109020000	148080000	150950000	151110000	130070000	161180000	146210000	149840000
Q8CI11	Q8CI11	Guanine nucleotide-binding protein-like 3	Gnl3	60.786	3461100000	130070000	105240000	68935000	165240000	363610000	310850000	157620000	143120000	124620000	130410000	24437000	69306000	88461000	61587000	131770000	138180000	155100000	187000000	181700000	193070000	205720000	125880000	139700000	148500000	73404000	103560000	87437000	75115000
Q925I1	Q925I1	ATPase family AAA domain-containing protein 3	Atad3	66.741	3454900000	152860000	113950000	94034000	85476000	234180000	260380000	170990000	137820000	152380000	144810000	112130000	181130000	208030000	150080000	150200000	131520000	136800000	130090000	152030000	162650000	175550000	139880000	143450000	146290000	161010000	152490000	155970000	143770000
O88379	O88379	Bromodomain adjacent to zinc finger domain protein 1A	Baz1a	178.46	3454800000	103030000	50948000	83866000	82554000	112420000	218430000	143140000	139910000	141240000	101690000	36412000	380750000	266430000	247500000	126130000	97394000	131930000	81650000	81485000	136280000	153990000	155220000	156780000	130720000	86994000	283990000	226040000	246530000
Q00547	Q00547	Hyaluronan mediated motility receptor	Hmmr	91.784	3452100000	197980000	80626000	192660000	49323000	227520000	225870000	153750000	137360000	184400000	90036000	64237000	136210000	153610000	117970000	181470000	117240000	240940000	94929000	142790000	151120000	182840000	127090000	151960000	141690000	62621000	128710000	130560000	114970000
P63323	P63323	40S ribosomal protein S12	Rps12	14.525	3447600000	132080000	67242000	97076000	86744000	204860000	135560000	173670000	156240000	144560000	124040000	157030000	183720000	163210000	166800000	122660000	122530000	114560000	171070000	148520000	97887000	181600000	148210000	144700000	126160000	202640000	164950000	158100000	176940000
Q9QZD9	Q9QZD9	Eukaryotic translation initiation factor 3 subunit I	Eif3i	36.46	3440300000	134320000	46440000	95542000	86583000	243280000	223440000	157820000	135800000	132120000	124590000	84201000	123040000	187840000	121630000	132620000	109290000	122540000	147840000	178100000	136740000	141120000	157780000	121940000	126070000	128940000	121490000	142100000	117370000
Q9EQU5	Q9EQU5	Protein SET	Set	33.377	3438000000	127860000	141500000	160020000	21725000	101070000	217320000	198840000	146350000	107210000	103050000	231640000	241010000	206370000	265350000	132330000	166370000	203470000	55510000	82009000	150480000	220370000	147230000	152410000	127860000	299320000	212740000	197340000	247400000
Q6A026	Q6A026	Sister chromatid cohesion protein PDS5 homolog A	Pds5a	150.33	3433000000	143340000	83117000	153790000	148400000	251690000	495400000	41334000	155940000	187830000	188800000	92910000	23848000	35082000	24074000	79003000	63241000	145240000	195310000	201190000	204510000	168300000	157530000	171180000	149850000	32352000	108620000	161390000	100880000
Q922D8	Q922D8	C-1-tetrahydrofolate synthase, cytoplasmic;Methylenetetrahydrofolate dehydrogenase;Methenyltetrahydrofolate cyclohydrolase;Formyltetrahydrofolate synthetase;C-1-tetrahydrofolate synthase, cytoplasmic, N-terminally processed	Mthfd1	101.2	3431700000	70653000	34846000	77124000	159870000	268880000	216640000	120420000	143180000	120690000	134440000	33230000	116470000	105420000	104940000	82967000	61070000	117840000	165180000	178620000	149460000	161380000	155380000	157210000	148820000	70562000	104430000	108740000	104640000
P17095	P17095	High mobility group protein HMG-I/HMG-Y	Hmga1	11.614	3404000000	176950000	189890000	142120000	126890000	242090000	196340000	198790000	191360000	133110000	151650000	38954000	53330000	58210000	72284000	140480000	266840000	199150000	206760000	175230000	138690000	167580000	133710000	150880000	168390000	53761000	59737000	59787000	76667000
P19253	P19253	60S ribosomal protein L13a	Rpl13a	23.464	3401100000	111820000	93803000	116790000	188490000	230830000	236790000	182610000	158770000	171340000	117710000	58627000	93064000	86046000	52235000	103030000	108930000	141030000	234820000	172190000	205020000	182060000	135520000	162210000	151700000	87445000	91354000	98657000	87962000
Q9QUR6	Q9QUR6	Prolyl endopeptidase	Prep	80.751	3385000000	29009000	23033000	61849000	210850000	72862000	103200000	282940000	57648000	51369000	382330000	6093000	49885000	33454000	198010000	117580000	120080000	191670000	104480000	152130000	184760000	204530000	163710000	149870000	218000000	55684000	133290000	117050000	117840000
Q80SU7	Q80SU7	Interferon-induced very large GTPase 1	Gvin1	280.81	3352900000	125480000	68541000	144200000	123390000	171530000	395520000	115200000	156260000	147320000	147150000	36193000	182390000	220930000	159140000	140860000	105750000	170710000	177260000	132550000	227360000	138360000	135350000	142480000	142360000	92472000	146610000	181480000	153450000
P30416	P30416	Peptidyl-prolyl cis-trans isomerase FKBP4;Peptidyl-prolyl cis-trans isomerase FKBP4, N-terminally processed	Fkbp4	51.572	3337200000	52739000	64558000	123640000	67357000	284320000	157050000	160890000	113220000	148510000	109070000	86806000	134840000	134030000	171740000	67796000	91794000	137920000	110500000	159240000	103630000	155070000	125470000	148140000	127300000	104830000	128600000	112280000	149130000
Q64737	Q64737	Trifunctional purine biosynthetic protein adenosine-3;Phosphoribosylamine--glycine ligase;Phosphoribosylformylglycinamidine cyclo-ligase;Phosphoribosylglycinamide formyltransferase	Gart	107.5	3328400000	57752000	36045000	39675000	117660000	265960000	211890000	108270000	81716000	103240000	113520000	28362000	117760000	126100000	114900000	85115000	86530000	91362000	182780000	167880000	133890000	121660000	127230000	140380000	136830000	65183000	121830000	119500000	111430000
P47753	P47753	F-actin-capping protein subunit alpha-1	Capza1	32.939	3323500000	192520000	118220000	105020000	34381000	140110000	160030000	94149000	184970000	141970000	107610000	390940000	226300000	248530000	233870000	231040000	157940000	113760000	60929000	85193000	109130000	97278000	163040000	139810000	126550000	482280000	190440000	205540000	239430000
Q3TAQ9	Q3TAQ9		Wdr36	99.719	3323500000	161280000	128390000	58711000	172670000	267460000	238900000	213050000	122530000	110460000	107430000	19788000	74541000	57296000	108260000	113430000	140340000	93270000	255910000	168400000	129170000	191710000	125920000	132640000	128170000	55752000	93396000	80348000	88925000
P21107	P21107	Tropomyosin alpha-3 chain	Tpm3	32.994	3309900000	129810000	161720000	113560000	27606000	133680000	110560000	97290000	156680000	170610000	179030000	235340000	224770000	173240000	270090000	126320000	196100000	128410000	64623000	105290000	67276000	91534000	116460000	143730000	154800000	419370000	222820000	145300000	214770000
Q3THS6;Q91X83	Q3THS6	S-adenosylmethionine synthase isoform type-2	Mat2a	43.688	3291800000	135640000	94390000	101790000	162460000	239130000	226570000	163820000	148910000	140800000	130690000	45216000	108540000	85715000	106370000	144340000	121840000	133980000	192490000	156060000	163430000	158960000	135410000	143370000	134720000	72522000	104280000	86895000	110230000
P63254	P63254	Cysteine-rich protein 1	Crip1	8.5497	3291000000	144140000	174990000	197200000	55482000	130540000	356470000	295020000	135220000	172200000	131620000	88656000	127360000	142370000	154350000	138920000	221510000	295570000	92263000	93918000	237730000	290240000	141000000	170100000	188580000	126250000	105180000	134900000	136650000
Q6P542	Q6P542	ATP-binding cassette sub-family F member 1	Abcf1	94.944	3285700000	110680000	50335000	153490000	71275000	156520000	267260000	165200000	144520000	156910000	115910000	54431000	209190000	171760000	183200000	125290000	101760000	179670000	115840000	127820000	169570000	143570000	133700000	139800000	148050000	94670000	179910000	161160000	171070000
Q9CWZ3;A0A0N4SUH6	Q9CWZ3;A0A0N4SUH6	RNA-binding protein 8A	Rbm8a	19.889	3281400000	192160000	132060000	133420000	87109000	222620000	201720000	98844000	157800000	132200000	122530000	200130000	182180000	167490000	129600000	125790000	154730000	155600000	69374000	117130000	109340000	109340000	113340000	123420000	120550000	215820000	113920000	132000000	146000000
P62858	P62858	40S ribosomal protein S28	Rps28	7.8409	3279900000	151420000	132070000	105940000	76911000	160960000	217800000	169690000	168200000	141390000	116610000	162720000	185800000	165750000	165190000	117470000	115340000	93044000	102210000	93162000	108290000	164070000	118220000	125320000	110480000	173350000	120990000	103610000	121980000
Q8VEE4	Q8VEE4	Replication protein A 70 kDa DNA-binding subunit;Replication protein A 70 kDa DNA-binding subunit, N-terminally processed	Rpa1	69.036	3266400000	174650000	71183000	76961000	92987000	135330000	187990000	84765000	146830000	134430000	120340000	194110000	206340000	190620000	218670000	179460000	103640000	121670000	127830000	110170000	135900000	101820000	140290000	131360000	134860000	226870000	186950000	191480000	215580000
P14211	P14211	Calreticulin	Calr	47.994	3262100000	81789000	83554000	64839000	46944000	126280000	137860000	242630000	160970000	119740000	105340000	216810000	323600000	222570000	283090000	85730000	98508000	83351000	77013000	88875000	91827000	212730000	141970000	128480000	131200000	265280000	250230000	211840000	271480000
Q9CZN7	Q9CZN7	Serine hydroxymethyltransferase	Shmt2	55.758	3257600000	64039000	66734000	44502000	63868000	191800000	130220000	155100000	133150000	152990000	118290000	80837000	235070000	195540000	231360000	75258000	78589000	64886000	115870000	123410000	90098000	159050000	127500000	141120000	120860000	179820000	196000000	177130000	224480000
Q9CW03	Q9CW03	Structural maintenance of chromosomes protein 3	Smc3	141.55	3251500000	112150000	131690000	151570000	86780000	191070000	226590000	108560000	142790000	144370000	109860000	44456000	131860000	126150000	127510000	116890000	149930000	163750000	137480000	135750000	143730000	125700000	152960000	153620000	134480000	88522000	126730000	139160000	124140000
Q8BV49;G3UZV2	Q8BV49	Pyrin and HIN domain-containing protein 1	Pyhin1	46.886	3211700000	72223000	65090000	72725000	64358000	162320000	184130000	75017000	131710000	140760000	148320000	172240000	331110000	336820000	384320000	84706000	112060000	106820000	100840000	103520000	116160000	69195000	135780000	137170000	133390000	218680000	295730000	251440000	308680000
Q99ME9	Q99ME9	Nucleolar GTP-binding protein 1	Gtpbp4	74.112	3204000000	61308000	55680000	66476000	165180000	184430000	194300000	182080000	148760000	193480000	103330000	16543000	290370000	227510000	95818000	87485000	110890000	93461000	194890000	162160000	140380000	190600000	118210000	143280000	129720000	55917000	140140000	96868000	118130000
Q8BP92	Q8BP92	Reticulocalbin-2	Rcn2	37.27	3195100000	164170000	57645000	147250000	62640000	207060000	180260000	118730000	132840000	117650000	130940000	110690000	134720000	112230000	140880000	159810000	130320000	164870000	95387000	145620000	126270000	118840000	135550000	133710000	128350000	161210000	119420000	145370000	121830000
Q9Z103	Q9Z103	Activity-dependent neuroprotector homeobox protein	Adnp	124.31	3153600000	53038000	41174000	22973000	15783000	45536000	64470000	32486000	30912000	41047000	39107000	13320000	53517000	52354000	42304000	159170000	124400000	121030000	100500000	98488000	124300000	128120000	108370000	148200000	123270000	94550000	165580000	142480000	147470000
Q6ZQL4	Q6ZQL4	WD repeat-containing protein 43	Wdr43	75.38	3129600000	108560000	110300000	70955000	153140000	270290000	189380000	227580000	108820000	126270000	131810000	23116000	106850000	70099000	83237000	124650000	134560000	82384000	195660000	173650000	140450000	197590000	111530000	126050000	152190000	71684000	115210000	75335000	85480000
E9Q2M9	E9Q2M9		Wdfy4	354.33	3127000000	129250000	47576000	164750000	86819000	231550000	604040000	91950000	115090000	139690000	110000000	18588000	42051000	80992000	31140000	133380000	101110000	183240000	131350000	150250000	320200000	124300000	137410000	132720000	128800000	19810000	66454000	103830000	56373000
Q61545	Q61545	RNA-binding protein EWS	Ewsr1	68.461	3121700000	165670000	147930000	169630000	34223000	168560000	222790000	111520000	133440000	141390000	116750000	83225000	169080000	196950000	155110000	135540000	172310000	183620000	73038000	110760000	139180000	110480000	114980000	129390000	114110000	177940000	140740000	160320000	139950000
P62192	P62192	26S protease regulatory subunit 4	Psmc1	49.184	3103400000	79192000	69835000	119350000	111670000	235910000	219860000	136020000	107300000	124880000	107790000	53039000	86458000	160030000	104990000	102010000	103140000	126330000	147490000	154090000	119400000	119560000	127670000	130430000	124400000	87125000	85638000	131010000	105210000
P26041	P26041	Moesin	Msn	67.766	3094000000	85585000	93001000	83955000	9776600	104840000	194980000	75715000	162750000	89750000	112160000	271610000	297900000	296410000	388430000	102810000	124540000	143080000	8405500	76374000	124840000	112960000	126840000	131320000	106750000	252730000	230070000	210910000	267440000
Q60932	Q60932	Voltage-dependent anion-selective channel protein 1	Vdac1	32.351	3084500000	79721000	58620000	163450000	38780000	177110000	257260000	252240000	145550000	120200000	129500000	78395000	158220000	265010000	182720000	137780000	90337000	179460000	71753000	114900000	130330000	196350000	145310000	110380000	113950000	99291000	123510000	198330000	159750000
P08249	P08249	Malate dehydrogenase, mitochondrial	Mdh2	35.611	3068100000	61531000	93156000	89541000	59933000	105100000	155710000	186770000	143880000	106870000	126190000	140630000	215130000	190900000	244540000	70422000	106830000	120240000	81529000	86367000	104080000	207060000	150540000	125740000	149590000	192540000	172680000	180710000	240040000
Q03267;P81183;Q8C208	Q03267	DNA-binding protein Ikaros	Ikzf1	57.336	3066800000	116930000	98925000	127480000	72350000	212640000	201930000	97792000	123730000	153420000	127760000	74622000	191250000	199880000	172530000	122100000	135430000	126190000	94522000	111130000	125800000	112540000	123020000	126640000	121080000	124180000	184180000	168090000	174300000
Q9CPT5	Q9CPT5	Nucleolar protein 16	Nop16	21.139	3053700000	172670000	154970000	81436000	108260000	231140000	176530000	125310000	144690000	134010000	109940000	76625000	110200000	113040000	71917000	142220000	161540000	125740000	125690000	141350000	103220000	125790000	132420000	112370000	114510000	123990000	84300000	91975000	65823000
P24270;Q8BI29	P24270	Catalase	Cat	59.795	3046900000	114270000	73605000	44142000	41772000	165350000	122670000	169900000	139830000	121200000	105210000	86369000	244720000	222460000	231390000	124090000	115290000	82454000	68217000	121060000	73540000	158540000	139550000	137530000	118410000	126040000	185440000	162600000	195070000
O88653	O88653	Ragulator complex protein LAMTOR3	Lamtor3	13.553	3036000000	155810000	102930000	126600000	76178000	212600000	0	0	0	182910000	130050000	248640000	199040000	218160000	148520000	159820000	131530000	162520000	105430000	161650000	0	0	0	181580000	145580000	354480000	176560000	206200000	148070000
O09106;O88895	O09106	Histone deacetylase 1	Hdac1	55.074	3028900000	127630000	46587000	86007000	66598000	133060000	177520000	104150000	63096000	102320000	139800000	104200000	147430000	251120000	211970000	124740000	84267000	125020000	104240000	103720000	118470000	117870000	91958000	111470000	128320000	146270000	171510000	168510000	193600000
Q9D0I9	Q9D0I9	Arginine--tRNA ligase, cytoplasmic	Rars	75.673	3022800000	55155000	46381000	64820000	122100000	200570000	221670000	180440000	124020000	123840000	138570000	16109000	123620000	134510000	91934000	74428000	73045000	102390000	141560000	147570000	146860000	166240000	116290000	123130000	133620000	38795000	103350000	128510000	103520000
Q6PGF5	Q6PGF5		Bms1	145.41	3019800000	85896000	102080000	35388000	157670000	262200000	178370000	181640000	137310000	138770000	83026000	18392000	133750000	81730000	91667000	86949000	126850000	66325000	187760000	167790000	122910000	163960000	121510000	124170000	115490000	55379000	117310000	97094000	101890000
Q99J72	Q99J72	DNA dC->dU-editing enzyme APOBEC-3	Apobec3	52.213	3016000000	98233000	59377000	31768000	107320000	216940000	268470000	127480000	181170000	128150000	88971000	63652000	153020000	156220000	121320000	124900000	80209000	70190000	119710000	158860000	138170000	140240000	132650000	127020000	128490000	102370000	150620000	132150000	139320000
Q9CQV8	Q9CQV8	14-3-3 protein beta/alpha;14-3-3 protein beta/alpha, N-terminally processed	Ywhab	28.086	3011800000	85286000	79920000	138770000	61856000	188440000	200410000	120620000	118930000	125700000	100280000	108730000	158780000	147330000	155960000	87046000	124460000	165650000	121130000	143020000	131170000	109440000	117190000	132680000	113550000	142240000	135350000	128150000	145840000
P54775	P54775	26S protease regulatory subunit 6B	Psmc4	47.408	2970600000	103570000	81018000	136060000	126430000	234840000	160130000	118640000	127650000	129100000	106450000	21589000	63844000	96163000	85165000	118410000	94120000	149860000	157060000	147670000	115280000	140100000	123860000	115210000	122460000	77884000	82655000	104820000	91286000
Q6NZJ6	Q6NZJ6	Eukaryotic translation initiation factor 4 gamma 1	Eif4g1	176.07	2970200000	85807000	49903000	107940000	107340000	183620000	233550000	168350000	121460000	103470000	131590000	16726000	74168000	147790000	89037000	101950000	77670000	139570000	161920000	128690000	130490000	139060000	116290000	125410000	130250000	35141000	73238000	127130000	83547000
Q8VH51	Q8VH51	RNA-binding protein 39	Rbm39	59.406	2961000000	85334000	75267000	112510000	126150000	292090000	318820000	117380000	126630000	157490000	112780000	32476000	122360000	138500000	97836000	112160000	107330000	128400000	130510000	157110000	201570000	125440000	127900000	118980000	117830000	87759000	123200000	111820000	97191000
Q9CQL1;P61327	Q9CQL1;P61327	Protein mago nashi homolog 2;Protein mago nashi homolog	Magohb;Magoh	17.091	2958000000	164370000	121450000	110380000	80564000	132300000	197160000	100010000	131960000	113750000	86827000	144950000	160690000	142370000	135750000	184390000	161250000	124190000	103760000	112490000	149710000	127600000	128480000	105030000	93888000	185210000	121870000	116410000	131330000
Q8VHM5	Q8VHM5		Hnrnpr	70.887	2934400000	136800000	106910000	107070000	67476000	254940000	191640000	103900000	141080000	77548000	100170000	111090000	115370000	154740000	106040000	138360000	133590000	164140000	85904000	134420000	126150000	101570000	125890000	120640000	126450000	147330000	115300000	130990000	111310000
Q64012	Q64012	RNA-binding protein Raly	Raly	33.188	2928700000	141030000	119650000	126230000	121660000	181850000	249260000	174700000	99044000	126990000	131600000	57399000	85336000	80069000	81285000	141670000	139890000	149290000	147880000	126630000	181290000	154870000	112390000	126300000	121840000	94714000	87037000	85087000	89660000
Q91V92	Q91V92	ATP-citrate synthase	Acly	119.73	2928200000	53247000	31934000	61342000	56845000	256980000	196030000	137750000	119130000	122070000	133410000	6999600	83555000	91501000	89843000	51629000	58928000	70264000	104130000	164730000	107410000	146450000	107280000	126020000	128230000	10132000	89100000	86409000	93381000
Q3TEA8	Q3TEA8	Heterochromatin protein 1-binding protein 3	Hp1bp3	60.866	2915000000	93502000	123760000	106940000	128410000	171890000	254390000	121970000	125250000	106130000	107430000	44471000	165080000	108330000	161280000	91673000	132260000	140210000	182530000	123280000	166220000	118970000	120320000	123630000	123280000	76493000	127880000	104060000	147320000
P09602	P09602	Non-histone chromosomal protein HMG-17	Hmgn2	9.4226	2913200000	175300000	144790000	84479000	135600000	131080000	170740000	96958000	197990000	144060000	87017000	111450000	180950000	154230000	139090000	105940000	162440000	98870000	224930000	107550000	87460000	91986000	177820000	143510000	109320000	154190000	197710000	170930000	160640000
P62911;P17932	P62911	60S ribosomal protein L32	Rpl32	15.86	2898600000	98632000	72974000	68988000	141990000	228740000	228360000	120130000	153530000	146740000	101150000	45121000	99825000	70795000	44932000	85007000	83003000	104860000	160540000	154260000	151560000	116760000	124110000	137700000	98785000	61942000	90405000	80221000	64479000
P62196	P62196	26S protease regulatory subunit 8	Psmc5	45.626	2896800000	73278000	69343000	87256000	81581000	233500000	172470000	118430000	93839000	126330000	105820000	20021000	88972000	138300000	85427000	86832000	90076000	113430000	141740000	128640000	115010000	112020000	119840000	128370000	111450000	59285000	73509000	96849000	88021000
Q9D2Q3	Q9D2Q3	Uncharacterized protein C10orf88 homolog		48.743	2892200000	80459000	102120000	157150000	62483000	114770000	247500000	129250000	111700000	127290000	176680000	47331000	109150000	84441000	105970000	116180000	106830000	185920000	118930000	119470000	173470000	150120000	134990000	107130000	147880000	105060000	108420000	116090000	112980000
Q9WVM1	Q9WVM1	Rac GTPase-activating protein 1	Racgap1	70.158	2889500000	134860000	98644000	86226000	59683000	143830000	89344000	44021000	122590000	107700000	130480000	273430000	236130000	249710000	230760000	112760000	106300000	105440000	73693000	99168000	83338000	63894000	122690000	119000000	124870000	305900000	211220000	194290000	218390000
Q9WVA4;Q9R1Q8	Q9WVA4	Transgelin-2	Tagln2	22.395	2874000000	50107000	85578000	54396000	38092000	135100000	131380000	157080000	90428000	106400000	92547000	108040000	224770000	281460000	300500000	68354000	97666000	105130000	74291000	91308000	94541000	143240000	114900000	129390000	125180000	195120000	193630000	196390000	232320000
P52293	P52293	Importin subunit alpha-1	Kpna2	57.927	2868000000	103670000	74758000	64794000	119610000	225100000	143860000	188730000	112090000	138170000	99473000	21669000	126330000	183050000	88757000	110260000	99405000	91947000	169090000	147830000	92156000	162620000	112400000	120960000	111550000	62958000	134000000	158480000	109650000
Q9WUK4	Q9WUK4	Replication factor C subunit 2	Rfc2	38.724	2863200000	136130000	103580000	63414000	133520000	227370000	166080000	125430000	101810000	123980000	102850000	79253000	115730000	92399000	98287000	146680000	128880000	116270000	138620000	131050000	119060000	126650000	102620000	121150000	112600000	115550000	123610000	115050000	103060000
Q6P9P6	Q6P9P6	Kinesin-like protein KIF11	Kif11	118.03	2850900000	74703000	42615000	89815000	199610000	292630000	185370000	147450000	119890000	126100000	127450000	0	32007000	91724000	20133000	88081000	77908000	120020000	195970000	181070000	151830000	169740000	115340000	123430000	152090000	0	57747000	106120000	50819000
Q99PL5	Q99PL5	Ribosome-binding protein 1	Rrbp1	172.88	2834000000	106970000	121950000	123220000	111690000	187110000	150490000	125720000	96579000	138970000	114660000	63976000	76607000	89173000	57613000	126910000	143940000	149110000	128030000	124150000	97861000	143330000	119480000	130330000	133600000	105450000	86109000	87906000	65168000
P68373	P68373	Tubulin alpha-1C chain	Tuba1c	49.909	2833600000	152360000	71551000	65163000	97714000	118350000	297430000	122180000	152900000	97675000	110670000	64680000	116230000	125990000	91428000	93340000	63795000	81518000	110960000	96504000	141930000	104430000	108440000	75126000	90331000	67783000	71367000	91946000	61723000
Q64522	Q64522	Histone H2A type 2-B	Hist2h2ab	14.013	2833100000	91063000	115780000	53776000	274140000	113580000	77826000	126440000	127840000	105940000	175790000	185310000	75066000	113480000	92063000	80698000	152770000	81214000	393790000	84814000	58388000	144410000	118150000	105740000	153390000	252650000	81174000	111130000	87913000
Q8VDW0	Q8VDW0	ATP-dependent RNA helicase DDX39A	Ddx39a	49.067	2831700000	126180000	75131000	90642000	134290000	181110000	311910000	103450000	123370000	109270000	102470000	23932000	70780000	102010000	54979000	100340000	78212000	108310000	134560000	104280000	142830000	103610000	95108000	93790000	94865000	39056000	61296000	81583000	55771000
Q62193	Q62193	Replication protein A 32 kDa subunit	Rpa2	29.718	2816600000	171330000	62547000	79856000	95618000	129470000	147070000	66492000	114060000	107030000	89662000	267060000	172000000	168390000	209750000	170740000	84967000	109220000	123350000	87597000	106400000	66204000	125670000	107020000	96164000	341300000	156160000	171520000	181650000
O70126	O70126	Aurora kinase B	Aurkb	39.384	2810500000	212930000	51053000	33852000	68048000	253090000	129370000	84228000	161570000	209900000	90138000	136970000	154520000	151010000	133470000	134610000	109640000	72456000	124210000	107780000	108600000	101530000	111930000	99386000	97043000	160280000	179550000	145190000	156770000
Q8R010	Q8R010	Aminoacyl tRNA synthase complex-interacting multifunctional protein 2	Aimp2	35.377	2797400000	102950000	63393000	63109000	54484000	228960000	184120000	132140000	105880000	94503000	81522000	22140000	93244000	154520000	83457000	81384000	74315000	86122000	100500000	124290000	96273000	133110000	103860000	99492000	105930000	84112000	79713000	118080000	95304000
P61205;P84078;Q8BSL7	P61205;P84078;Q8BSL7	ADP-ribosylation factor 3;ADP-ribosylation factor 1;ADP-ribosylation factor 2	Arf3;Arf1;Arf2	20.601	2796600000	43766000	67654000	60004000	81005000	191870000	260790000	124480000	72302000	113270000	97773000	40671000	135500000	167230000	100920000	68246000	83660000	81881000	120760000	115280000	150810000	109910000	93029000	102380000	84530000	71030000	96690000	115040000	108330000
E9Q4Y4	E9Q4Y4		Cep192	276.34	2783000000	135730000	113390000	58228000	54031000	154880000	127550000	22563000	159090000	124740000	112260000	282130000	252150000	181900000	204280000	130290000	142840000	134480000	72870000	98622000	104240000	31417000	132900000	122850000	115870000	310970000	200550000	140190000	174830000
Q9JKX4	Q9JKX4	Protein AATF	Aatf	59.481	2773300000	119780000	117150000	52438000	121060000	202540000	131750000	164630000	116320000	120910000	128590000	45295000	105480000	78077000	86491000	145770000	135300000	91850000	175710000	134140000	81678000	147070000	107000000	118840000	114310000	104950000	90053000	62827000	75858000
A2AUM9	A2AUM9	Centrosomal protein of 152 kDa	Cep152	196.53	2770500000	178690000	94512000	63489000	55824000	112530000	92443000	13933000	98111000	106980000	89110000	407490000	169330000	162190000	169440000	157840000	137760000	92639000	83965000	91212000	58886000	29078000	125020000	117830000	112220000	438410000	172640000	148230000	166770000
P83917	P83917	Chromobox protein homolog 1	Cbx1	21.418	2760000000	178780000	116460000	111520000	62189000	102160000	104360000	98042000	152060000	91855000	107320000	151890000	129290000	115250000	126160000	184680000	155790000	135890000	88926000	78158000	72188000	95713000	142310000	99906000	113730000	217130000	124880000	113430000	125150000
Q61879	Q61879	Myosin-10	Myh10	228.99	2755900000	337640000	345640000	213360000	13973000	179250000	422030000	30733000	126930000	105680000	104580000	5576100	16284000	24834000	14951000	322820000	322870000	316630000	24897000	109730000	227230000	46967000	133370000	118850000	121740000	17466000	28119000	27389000	11460000
Q9CRB2	Q9CRB2	H/ACA ribonucleoprotein complex subunit 2	Nhp2	17.247	2755000000	149110000	132330000	93172000	95053000	184770000	220430000	101220000	121640000	95454000	110270000	128960000	69927000	76338000	65758000	150630000	165340000	133720000	121480000	152000000	126510000	115410000	112710000	121360000	120210000	158850000	81265000	79240000	83007000
Q9D1R9	Q9D1R9	60S ribosomal protein L34	Rpl34	13.293	2747400000	76562000	66670000	126830000	101070000	213830000	250710000	139780000	102140000	132920000	105750000	38261000	121300000	107660000	76166000	78107000	88563000	148200000	121470000	152850000	186090000	146090000	100350000	134440000	126350000	54249000	114410000	97496000	79431000
Q9QX47	Q9QX47	Protein SON	Son	265.65	2742700000	183660000	161180000	180960000	28822000	140080000	196000000	116190000	122000000	126080000	129400000	69280000	112470000	109590000	102270000	154820000	176570000	198550000	101920000	107410000	140200000	125880000	109820000	117920000	113650000	114050000	104370000	93628000	105280000
Q91WN1	Q91WN1	DnaJ homolog subfamily C member 9	Dnajc9	30.059	2735900000	142680000	86471000	102200000	72777000	79997000	288210000	102620000	131470000	115290000	70475000	109260000	135110000	89299000	151640000	142850000	111020000	142720000	85866000	83096000	129160000	97296000	121640000	114890000	106230000	185240000	133400000	120770000	159360000
Q68FL6	Q68FL6	Methionine--tRNA ligase, cytoplasmic	Mars	101.43	2731500000	79391000	49063000	57719000	78672000	213270000	207010000	153480000	94241000	105620000	90075000	22086000	92593000	118620000	88970000	81089000	74915000	91059000	119650000	136850000	138020000	131210000	97765000	116300000	116380000	60649000	82853000	108820000	97915000
P47738	P47738	Aldehyde dehydrogenase, mitochondrial	Aldh2	56.537	2709400000	81303000	54823000	124580000	112820000	132250000	245560000	156810000	96433000	120100000	99128000	59410000	77689000	71208000	86868000	75945000	93330000	150850000	122350000	103710000	149450000	148800000	109620000	124540000	123940000	98190000	74969000	87013000	101050000
P23492;Q9D8C9	P23492	Purine nucleoside phosphorylase	Pnp	32.277	2699600000	101470000	106090000	98561000	15707000	48751000	201740000	158060000	111310000	83407000	119270000	151350000	286320000	249290000	367380000	74940000	98568000	102810000	31020000	49369000	100350000	165870000	87324000	108620000	104990000	184250000	183060000	172800000	264020000
Q9ERU9	Q9ERU9	E3 SUMO-protein ligase RanBP2	Ranbp2	341.12	2691200000	91230000	84111000	72911000	116090000	161870000	171590000	130160000	118300000	119750000	107080000	21152000	95897000	116730000	82140000	102350000	111520000	103310000	140140000	128770000	111240000	130810000	120830000	117530000	116780000	35554000	95765000	103720000	86618000
P26516	P26516	26S proteasome non-ATPase regulatory subunit 7	Psmd7	36.539	2687200000	82707000	102040000	63548000	93541000	264710000	152720000	103290000	108070000	110430000	105540000	46690000	67526000	65742000	52451000	93431000	103290000	98298000	121550000	167950000	105380000	91247000	105150000	118410000	99182000	69748000	79350000	86064000	68606000
Q9R1C7;Q80W14	Q9R1C7	Pre-mRNA-processing factor 40 homolog A	Prpf40a	108.48	2673400000	164310000	119980000	120350000	93850000	172570000	247620000	135740000	110660000	107140000	107390000	68498000	66931000	102610000	50846000	136390000	163680000	166990000	116990000	115640000	139630000	114730000	117780000	120580000	117660000	110680000	85958000	88470000	69277000
Q8R050;Q149F3	Q8R050;Q149F3	Eukaryotic peptide chain release factor GTP-binding subunit ERF3A;Eukaryotic peptide chain release factor GTP-binding subunit ERF3B	Gspt1;Gspt2	68.625	2672600000	73241000	104960000	84493000	90027000	194060000	213670000	115520000	68502000	119580000	82006000	35828000	102010000	81992000	100630000	91589000	106110000	116900000	112510000	126100000	135360000	118680000	93168000	121320000	107660000	68026000	84535000	72433000	85908000
Q80Y19	Q80Y19	Rho GTPase-activating protein 11A	Arhgap11a	108.43	2658100000	204200000	147740000	147250000	118940000	202450000	27586000	27583000	133070000	26819000	128070000	793670	26507000	134260000	166860000	151510000	121070000	118600000	158060000	95584000	116920000	182360000	173120000	114760000	93479000	40108000	116270000	91211000	132620000
Q99PV0	Q99PV0	Pre-mRNA-processing-splicing factor 8	Prpf8	273.61	2651500000	61603000	40193000	72194000	87240000	233420000	275070000	152690000	144400000	62593000	81752000	27409000	94242000	77019000	79973000	86553000	70742000	87857000	114640000	142080000	149540000	127990000	118890000	112560000	108020000	59685000	98404000	95223000	89983000
P35564	P35564	Calnexin	Canx	67.277	2647600000	69831000	59443000	67024000	44941000	123690000	89048000	98445000	115140000	84343000	92261000	145970000	172060000	329730000	195530000	69064000	89238000	90608000	73259000	85632000	75439000	152210000	122430000	120120000	113310000	150490000	145860000	226300000	167010000
Q9CQE8	Q9CQE8	UPF0568 protein C14orf166 homolog		28.152	2646000000	150830000	85781000	78318000	43426000	140380000	189540000	89935000	99125000	97765000	82412000	89324000	106830000	188700000	171610000	113510000	117470000	107150000	71709000	119420000	107260000	104000000	103020000	106940000	111920000	122940000	115300000	129450000	147850000
P80313	P80313	T-complex protein 1 subunit eta	Cct7	59.652	2619000000	32563000	49121000	54805000	103690000	215140000	141880000	99433000	103760000	100820000	115340000	27000000	70054000	93786000	71216000	45394000	63565000	79533000	126300000	138560000	106940000	115520000	109240000	104400000	98157000	45306000	77594000	107670000	72297000
P09103	P09103	Protein disulfide-isomerase	P4hb	57.058	2609100000	55225000	59142000	60893000	26040000	60772000	121080000	185310000	100320000	101000000	84475000	175890000	242340000	190820000	235750000	62097000	83692000	107100000	55787000	61571000	81706000	157460000	105270000	117480000	102370000	194690000	181160000	153440000	224190000
Q9D0B0	Q9D0B0	Serine/arginine-rich splicing factor 9	Srsf9	25.661	2604400000	144150000	108270000	137550000	66304000	147140000	254100000	98361000	146850000	88275000	91642000	121230000	119220000	129770000	94089000	123230000	165420000	157780000	93177000	119460000	170870000	103570000	107600000	116250000	109980000	139960000	107830000	114640000	114600000
E9Q5G3	E9Q5G3	Kinesin-like protein KIF23	Kif23	108.77	2600800000	85205000	45106000	35158000	26788000	122940000	122880000	25601000	90580000	87194000	98981000	273110000	338860000	232560000	268690000	96282000	73436000	76200000	73931000	96625000	80075000	57705000	105360000	104160000	113360000	305970000	219140000	171980000	194450000
Q8K4Z5	Q8K4Z5	Splicing factor 3A subunit 1	Sf3a1	88.544	2600500000	140420000	114660000	91112000	44886000	169010000	142750000	86905000	134920000	117220000	78887000	87088000	174920000	188550000	126250000	139230000	119770000	112800000	71316000	102970000	96948000	112960000	110190000	117490000	109530000	137280000	151590000	160100000	145360000
Q61316	Q61316	Heat shock 70 kDa protein 4	Hspa4	94.132	2588700000	39931000	65221000	80004000	82007000	154610000	143780000	138500000	122400000	111750000	98195000	59150000	131430000	111600000	150720000	68456000	94671000	102220000	85294000	101230000	100290000	139950000	109920000	109740000	104980000	111480000	115740000	119280000	131320000
P10639	P10639	Thioredoxin	Txn	11.675	2586500000	23336000	124700000	94536000	3172000	191480000	92414000	220460000	101880000	118960000	39372000	51859000	206460000	91130000	229800000	54889000	93453000	102780000	29750000	83825000	115110000	182140000	94624000	93982000	66480000	182850000	204170000	161890000	189650000
P19157;P46425;F6RWR5	P19157;P46425	Glutathione S-transferase P 1;Glutathione S-transferase P 2	Gstp1;Gstp2	23.609	2582300000	75527000	68083000	64612000	76385000	147710000	143760000	108550000	107870000	105610000	91808000	74934000	132370000	83010000	173560000	77126000	88548000	89992000	95888000	122150000	96450000	122310000	105960000	108500000	104640000	119800000	110190000	97953000	130560000
Q8BGA5	Q8BGA5	KRR1 small subunit processome component homolog	Krr1	43.537	2577200000	105930000	93469000	63944000	122260000	200310000	138830000	155430000	105320000	101630000	107820000	41898000	79425000	53486000	50328000	111820000	123040000	90902000	163120000	145890000	84646000	140940000	101390000	124150000	109240000	84379000	69175000	56065000	53782000
Q8C7V3;REV__Q8C7V3	Q8C7V3	U3 small nucleolar RNA-associated protein 15 homolog	Utp15	59.374	2559700000	91725000	79060000	58695000	155210000	230220000	158910000	154100000	112890000	116240000	96904000	15625000	77712000	64145000	73044000	105330000	115030000	76214000	170310000	157380000	106760000	161520000	112310000	111800000	109650000	38647000	85762000	62227000	72263000
Q3UJB0	Q3UJB0		Sf3b2	98.197	2558200000	154980000	115050000	94536000	17441000	133910000	136630000	111000000	118360000	127930000	115860000	127230000	196650000	181990000	116180000	118520000	154460000	126480000	45997000	90713000	94822000	105080000	98685000	113210000	108240000	144860000	140700000	157690000	121060000
P97452	P97452	Ribosome biogenesis protein BOP1	Bop1	82.545	2556200000	81718000	98561000	48279000	115970000	214250000	165500000	185410000	119050000	112900000	93294000	25599000	88911000	51781000	61134000	90661000	119990000	73934000	163030000	135280000	102080000	173980000	102220000	111550000	105140000	62333000	72856000	54746000	74296000
Q9CY58	Q9CY58	Plasminogen activator inhibitor 1 RNA-binding protein	Serbp1	44.714	2556000000	86132000	66301000	97774000	28889000	113880000	132730000	157240000	136360000	97320000	102570000	122620000	199970000	247550000	201580000	98199000	85038000	125510000	60488000	75559000	74116000	134570000	97259000	104680000	101610000	165800000	159580000	190830000	199160000
O55143;Q8R429	O55143	Sarcoplasmic/endoplasmic reticulum calcium ATPase 2	Atp2a2	114.86	2549300000	44820000	51276000	52666000	50068000	127250000	117650000	237720000	119020000	136330000	98515000	22106000	134180000	160840000	114990000	51661000	68888000	73314000	80155000	82585000	86818000	230590000	98373000	114630000	105040000	51627000	121650000	163480000	126620000
Q5XG71	Q5XG71	Small subunit processome component 20 homolog	Utp20	317.74	2541100000	52367000	64625000	21791000	146350000	209180000	139790000	193410000	111580000	89864000	67656000	13347000	95472000	85553000	103010000	70364000	104170000	67636000	157490000	120060000	89205000	151950000	99504000	114560000	104720000	46920000	110020000	83868000	99299000
Q8VDP4	Q8VDP4	Cell cycle and apoptosis regulator protein 2	Ccar2	103	2536000000	152780000	133040000	172160000	105690000	200820000	243850000	114440000	107580000	100690000	97265000	21198000	37513000	59180000	43244000	128870000	145340000	200700000	126840000	122750000	165210000	125430000	94396000	113320000	108840000	49078000	58103000	58678000	62127000
P07742	P07742	Ribonucleoside-diphosphate reductase large subunit	Rrm1	90.209	2534900000	78452000	66941000	128400000	64842000	195940000	208830000	121230000	94660000	115810000	121720000	21779000	38905000	92389000	63176000	91854000	87726000	127380000	113420000	119400000	146920000	114420000	113540000	105920000	106710000	46382000	67564000	92475000	78905000
E9Q5C9	E9Q5C9		Nolc1	73.697	2525300000	78977000	26853000	178530000	30065000	138830000	189140000	132350000	103150000	87428000	115990000	56092000	173850000	206610000	195090000	90719000	59014000	196910000	61491000	114020000	117040000	116680000	105090000	111150000	113540000	90232000	142740000	162580000	162660000
Q9DBJ1;O70250	Q9DBJ1	Phosphoglycerate mutase 1	Pgam1	28.832	2519500000	52294000	69218000	78905000	52265000	124620000	154890000	117860000	114430000	88582000	88038000	81391000	133310000	166620000	207400000	61746000	85045000	88059000	75155000	90712000	85485000	162440000	116580000	93157000	89055000	122180000	138760000	136360000	170290000
P62835;P35276	P62835	Ras-related protein Rap-1A	Rap1a	20.987	2516700000	57791000	38081000	54143000	36777000	181700000	218290000	153420000	120460000	85165000	91422000	49501000	66591000	170600000	129800000	73015000	83680000	99216000	80800000	124010000	127750000	122120000	93141000	90538000	86162000	97492000	73182000	116610000	122780000
O08810	O08810	116 kDa U5 small nuclear ribonucleoprotein component	Eftud2	109.36	2511600000	102080000	94528000	91465000	42737000	195000000	201770000	89661000	104090000	96294000	90354000	13503000	85708000	112090000	95499000	103880000	116560000	123530000	99607000	121490000	108670000	102190000	96181000	104950000	109890000	30245000	86980000	96417000	82731000
P35922	P35922	Fragile X mental retardation protein 1 homolog	Fmr1	68.988	2506700000	165100000	142830000	89116000	42453000	179030000	146590000	63941000	85664000	129580000	86348000	76453000	148490000	137590000	91234000	142280000	175160000	114710000	84899000	128150000	98565000	79457000	106030000	110130000	95273000	133890000	112180000	122270000	96852000
P62821	P62821	Ras-related protein Rab-1A	Rab1A	22.677	2506700000	68155000	74793000	74268000	81550000	150040000	154910000	112370000	101660000	105490000	90687000	42993000	118340000	151560000	119180000	79718000	93966000	109370000	91778000	110670000	123500000	116710000	104070000	96134000	105020000	84782000	97659000	120840000	96273000
P18181	P18181	CD48 antigen	Cd48	27.383	2506000000	221050000	163940000	31710000	51065000	178810000	44843000	87902000	119820000	98982000	85068000	77264000	44024000	88166000	62457000	200810000	194990000	47868000	65603000	132320000	40132000	109030000	111890000	102320000	101210000	105360000	74557000	75913000	70837000
P67778	P67778	Prohibitin	Phb	29.82	2505300000	67290000	63096000	54524000	25998000	88857000	65224000	119580000	119780000	97391000	108000000	81196000	119160000	366970000	95822000	90836000	94593000	90639000	44274000	55073000	69210000	111860000	108860000	114080000	104750000	142980000	94249000	272970000	99939000
Q91VE6	Q91VE6	MKI67 FHA domain-interacting nucleolar phosphoprotein	Nifk	36.265	2500700000	91208000	101570000	75879000	137760000	211500000	148080000	170230000	122860000	108100000	89790000	26181000	100390000	59621000	64396000	91744000	114170000	88504000	146680000	134060000	117920000	162490000	100570000	108100000	115120000	41324000	105010000	79399000	80213000
Q8BTI8	Q8BTI8	Serine/arginine repetitive matrix protein 2	Srrm2	294.84	2499500000	98465000	102890000	78124000	60080000	180820000	172340000	99324000	92040000	100600000	115550000	90559000	165260000	122090000	131760000	110060000	134620000	124500000	89438000	116120000	109970000	116110000	97307000	104590000	119920000	109930000	124230000	108800000	124330000
Q03347	Q03347	Runt-related transcription factor 1	Runx1	48.609	2487700000	124470000	81175000	51806000	88115000	142580000	117540000	139440000	109100000	119770000	98315000	67600000	101900000	96919000	95038000	116700000	121780000	55963000	90374000	99411000	67061000	140630000	90153000	107980000	92608000	128390000	96608000	94641000	94219000
Q3V300	Q3V300	Kinesin-like protein KIF22	Kif22	73.189	2480000000	123580000	49689000	76201000	75139000	159510000	196590000	123350000	102870000	115370000	98366000	29120000	148980000	147320000	142300000	123470000	89085000	97142000	99667000	111380000	131150000	118280000	103960000	115940000	110530000	53250000	145770000	121120000	122020000
Q9Z0N1;Q9Z0N2	Q9Z0N1;Q9Z0N2	Eukaryotic translation initiation factor 2 subunit 3, X-linked;Eukaryotic translation initiation factor 2 subunit 3, Y-linked	Eif2s3x;Eif2s3y	51.065	2478400000	64826000	34816000	91026000	36651000	167240000	161240000	149820000	91294000	108240000	84945000	16351000	128450000	116650000	110650000	90915000	67061000	113140000	78121000	103960000	120590000	126660000	94626000	101950000	108080000	45681000	99947000	104110000	106140000
Q9D1C9	Q9D1C9	Ribosomal RNA-processing protein 7 homolog A	Rrp7a	32.399	2462300000	111900000	104740000	43444000	91793000	190810000	142250000	168500000	92977000	91482000	116800000	45986000	68861000	64845000	58608000	101460000	131800000	82197000	116540000	127200000	87187000	135660000	88237000	87314000	104720000	73884000	83086000	67596000	75304000
Q5SSI6	Q5SSI6	U3 small nucleolar RNA-associated protein 18 homolog	Utp18	61.217	2457700000	83330000	65293000	51034000	138870000	198850000	184820000	189740000	100490000	114690000	104600000	16983000	93252000	70872000	99703000	81765000	85684000	74324000	168190000	115900000	105910000	151490000	126540000	108890000	97654000	58034000	85541000	65657000	91278000
Q6P4T2	Q6P4T2	U5 small nuclear ribonucleoprotein 200 kDa helicase	Snrnp200	244.54	2448600000	78831000	51704000	71092000	65279000	179290000	222130000	138870000	91160000	93026000	91448000	23374000	99388000	112330000	60440000	90113000	73988000	92104000	102590000	126840000	125800000	108960000	94780000	106950000	98201000	56127000	92480000	92995000	89628000
Q9JI13	Q9JI13	Something about silencing protein 10	Utp3	53.398	2447900000	66340000	172450000	71081000	122120000	223280000	141880000	133240000	78872000	117640000	91814000	25969000	31370000	20529000	20808000	88909000	169610000	105080000	136590000	135150000	81030000	137820000	98635000	110950000	102860000	56741000	48662000	40325000	35436000
O89086	O89086	RNA-binding protein 3	Rbm3	16.604	2428800000	106820000	80836000	100260000	41648000	82994000	189420000	169510000	98291000	75293000	65667000	150250000	221750000	161640000	183170000	95866000	108040000	131120000	56284000	74437000	92431000	145070000	99207000	107430000	118200000	161620000	138650000	106330000	169510000
Q61584	Q61584	Fragile X mental retardation syndrome-related protein 1	Fxr1	76.221	2422200000	111660000	115660000	98357000	80467000	170380000	174900000	91686000	92295000	109140000	87409000	61293000	84473000	116860000	80759000	115390000	128630000	110720000	115230000	125800000	99263000	94501000	95259000	100560000	106670000	103740000	84509000	101230000	76311000
Q8JZQ9	Q8JZQ9	Eukaryotic translation initiation factor 3 subunit B	Eif3b	91.369	2421300000	63354000	37904000	52384000	79000000	187430000	157040000	100210000	109720000	96066000	103870000	32842000	84398000	107310000	76948000	67875000	77773000	87988000	102850000	122720000	97051000	101630000	107400000	102160000	100450000	59924000	91047000	113080000	81597000
O35691	O35691	Pinin	Pnn	82.435	2412000000	116560000	151970000	166180000	19723000	153120000	241380000	78108000	119360000	99910000	71166000	103680000	58932000	92614000	48715000	128380000	156560000	163130000	58622000	101980000	134730000	88516000	101880000	98830000	95793000	143630000	72052000	82325000	57118000
Q6PAC3	Q6PAC3	DDB1- and CUL4-associated factor 13	Dcaf13	51.456	2402100000	54869000	61904000	41995000	111600000	197610000	143080000	193450000	75341000	109920000	80949000	9723300	99341000	89951000	84798000	77498000	92823000	62906000	145210000	146010000	96648000	164250000	96132000	105350000	97493000	30509000	92650000	65461000	82176000
Q8VCG3	Q8VCG3	WD repeat-containing protein 74	Wdr74	42.636	2398100000	115970000	79527000	47218000	103290000	189500000	143560000	159340000	109400000	95486000	83741000	41492000	72011000	54015000	70158000	102990000	91730000	72818000	128540000	111590000	87508000	145780000	106310000	100450000	95732000	87706000	78182000	74366000	69917000
P70168	P70168	Importin subunit beta-1	Kpnb1	97.183	2397100000	59927000	52522000	50569000	40225000	171590000	117520000	87317000	108800000	121400000	91244000	41629000	123600000	237850000	111830000	75842000	74609000	74475000	86891000	104950000	81746000	87834000	89864000	86954000	111040000	85346000	92230000	166070000	106860000
P62071;P10833	P62071	Ras-related protein R-Ras2	Rras2	23.399	2390800000	90693000	89428000	52870000	45812000	112110000	136670000	77999000	123510000	95629000	78837000	53525000	193410000	254520000	278860000	81332000	101380000	67653000	56353000	74628000	97861000	87023000	102260000	96483000	77416000	74786000	171110000	191210000	194380000
Q922K7	Q922K7	Probable 28S rRNA (cytosine-C(5))-methyltransferase	Nop2	86.751	2370300000	89728000	81214000	64307000	134760000	204760000	98193000	150390000	94208000	98330000	98826000	17939000	90810000	76386000	94393000	74701000	113100000	88110000	156770000	133270000	91950000	136590000	81475000	108360000	104540000	44314000	91351000	75322000	78161000
Q99JY9;Q641P0	Q99JY9	Actin-related protein 3	Actr3	47.357	2361000000	101690000	54081000	64284000	23243000	138160000	144550000	88764000	104960000	105720000	91045000	106570000	95385000	129300000	146200000	85077000	75830000	84184000	80498000	92437000	80588000	82159000	102400000	100290000	94335000	200570000	99583000	108640000	113940000
Q8BT07	Q8BT07	Centrosomal protein of 55 kDa	Cep55	53.93	2352000000	75554000	79043000	91834000	74047000	127150000	101740000	93927000	106470000	91609000	110950000	121760000	133130000	133370000	141720000	110050000	107740000	99899000	94257000	103230000	83175000	87964000	96098000	102500000	97471000	169810000	113190000	111850000	127630000
Q9R0U0	Q9R0U0	Serine/arginine-rich splicing factor 10	Srsf10	31.3	2342100000	155840000	104810000	77735000	42290000	134540000	156650000	97907000	107710000	84885000	80174000	121600000	121120000	106070000	105200000	164650000	129960000	106250000	82988000	98539000	117990000	101210000	103050000	92941000	90243000	166850000	109590000	98676000	95558000
Q6P5D8	Q6P5D8	Structural maintenance of chromosomes flexible hinge domain-containing protein 1	Smchd1	225.65	2333300000	65489000	44342000	68330000	95472000	148080000	184300000	118050000	97799000	87787000	82609000	11259000	108060000	128940000	64936000	90073000	65232000	113310000	117750000	98871000	131310000	98103000	93786000	100440000	107390000	21310000	105130000	103410000	84878000
O55098	O55098	Serine/threonine-protein kinase 10	Stk10	111.9	2310200000	101030000	66034000	153900000	42072000	122150000	203360000	166810000	110900000	91274000	107530000	18996000	71994000	105370000	69069000	97546000	83621000	167400000	82134000	99921000	129720000	129920000	94218000	103120000	98547000	40713000	70872000	78414000	79211000
P26350	P26350	Prothymosin alpha;Prothymosin alpha, N-terminally processed;Thymosin alpha	Ptma	12.254	2306400000	70916000	78297000	61330000	20002000	88104000	77828000	52577000	137660000	108000000	77924000	159770000	241200000	194210000	268400000	66084000	93316000	65433000	32916000	64715000	49575000	44497000	129380000	98950000	79500000	328400000	259820000	170820000	199790000
Q99LC5	Q99LC5	Electron transfer flavoprotein subunit alpha, mitochondrial	Etfa	35.009	2304000000	111260000	104460000	138280000	96220000	100740000	275750000	97018000	107450000	73181000	67810000	60803000	76147000	163090000	80182000	112240000	105490000	129930000	106570000	76402000	148590000	103600000	101840000	95260000	87709000	90201000	97099000	110010000	108130000
Q9WVJ2	Q9WVJ2	26S proteasome non-ATPase regulatory subunit 13	Psmd13	42.809	2299800000	63019000	45801000	90826000	41813000	195310000	146940000	74060000	78945000	103770000	100530000	36833000	71145000	112520000	91185000	50212000	68582000	98481000	97984000	122080000	102780000	87795000	66459000	98131000	101400000	67118000	69587000	93272000	82923000
Q62448	Q62448	Eukaryotic translation initiation factor 4 gamma 2	Eif4g2	102.1	2299400000	119790000	76278000	89780000	84541000	182040000	185940000	109540000	106650000	77102000	97037000	1268400	53379000	70451000	56247000	99697000	99680000	104920000	142400000	115030000	115950000	107390000	102000000	97814000	102120000	3484700	46969000	73849000	45803000
Q62261;Q68FG2	Q62261	Spectrin beta chain, non-erythrocytic 1	Sptbn1	274.22	2296700000	125610000	142190000	40621000	18194000	122680000	71269000	42688000	95595000	89218000	89638000	58024000	106280000	104480000	56562000	51534000	69705000	16374000	21438000	23337000	20431000	10628000	79688000	42387000	39678000	298510000	254880000	422220000	123130000
Q9EQ61	Q9EQ61	Pescadillo homolog	Pes1	67.795	2286800000	63033000	47742000	42132000	116110000	207150000	170720000	171320000	116470000	79295000	76732000	19350000	76888000	55230000	77719000	67782000	77711000	66530000	136070000	130950000	97393000	139910000	104090000	88528000	101020000	40175000	74300000	71135000	82511000
Q61655;Q8BZY3;Q9QY15	Q61655;Q8BZY3	ATP-dependent RNA helicase DDX19A	Ddx19a;Ddx19b	53.932	2280300000	65862000	54031000	93459000	117040000	144280000	223600000	106100000	88918000	115600000	88460000	15747000	54011000	80304000	66148000	73270000	73385000	128230000	133460000	98075000	118650000	107030000	88071000	106800000	101300000	38876000	59954000	79132000	70393000
Q9CY66	Q9CY66	H/ACA ribonucleoprotein complex subunit 1	Gar1	23.474	2271000000	114010000	129340000	85148000	89005000	175100000	161630000	88821000	97922000	107980000	74824000	116480000	36987000	39898000	28733000	110610000	124650000	118520000	73339000	106250000	107810000	86831000	89139000	93435000	81845000	129090000	69596000	77333000	68759000
P62317	P62317	Small nuclear ribonucleoprotein Sm D2	Snrpd2	13.527	2270700000	104360000	86277000	92001000	46111000	152470000	175400000	81411000	95682000	90340000	72703000	92209000	126710000	135780000	103050000	81068000	97729000	73995000	62716000	102770000	102840000	85999000	87005000	85196000	80314000	120930000	99921000	104710000	91257000
Q80XU3	Q80XU3	Nuclear ubiquitous casein and cyclin-dependent kinase substrate 1	Nucks1	26.313	2260600000	87291000	27836000	137690000	10918000	57500000	162070000	46730000	115820000	106540000	99115000	157390000	271020000	273640000	171180000	86400000	46966000	182030000	30021000	43475000	111080000	58257000	107400000	108080000	109290000	204280000	228910000	243560000	169270000
Q8BHB4	Q8BHB4	WD repeat-containing protein 3	Wdr3	105.77	2251600000	50951000	79163000	34469000	116510000	177400000	121920000	143470000	80256000	94226000	94027000	16658000	66584000	57944000	68294000	68098000	83188000	63563000	150220000	110570000	84691000	142750000	105520000	85076000	85367000	39902000	79902000	59566000	74311000
Q8VI84	Q8VI84	Nucleolar complex protein 3 homolog	Noc3l	93.21	2244100000	7616100	0	0	13029000	4403200	11794000	8725300	6769500	2684000	0	900230000	6985200	495240000	734910000	130370000	0	0	179290000	138400000	132750000	141740000	104570000	110900000	0	213140000	174120000	80253000	107720000
Q9CPN9	Q9CPN9		2210010C04Rik	26.422	2240700000	312490000	0	71058000	134620000	79210000	75314000	66922000	108010000	71344000	82269000	113710000	112610000	134470000	90231000	175440000	0	103640000	202070000	65318000	60719000	77381000	116840000	65907000	103350000	175820000	115920000	142310000	102870000
Q9JI11	Q9JI11	Serine/threonine-protein kinase 4;Serine/threonine-protein kinase 4 37kDa subunit;Serine/threonine-protein kinase 4 18kDa subunit	Stk4	55.541	2232400000	88165000	88555000	112320000	57529000	177320000	163160000	82575000	102730000	79490000	92620000	53394000	75192000	102360000	68854000	92170000	106710000	128340000	111390000	88467000	113770000	89351000	102530000	106960000	93534000	95976000	68327000	89626000	89153000
Q61771;O35066;O35231;Q99PW8	Q61771;O35066;O35231;Q99PW8	Kinesin-like protein KIF3B;Kinesin-like protein KIF3B, N-terminally processed;Kinesin-like protein KIF3C;Kinesin-like protein KIFC3;Kinesin-like protein KIF17	Kif3b;Kif3c;Kifc3;Kif17	85.287	2224700000	572720000	12368000	0	1295000	271470000	2492000	200760000	2104600	2437600	0	4478300	4296200	707790000	4871400	140780000	52470000	0	60546000	80079000	70574000	140090000	69985000	97778000	0	243230000	155340000	160370000	195090000
Q9D8B3;Q9D7F7	Q9D8B3	Charged multivesicular body protein 4b	Chmp4b	24.936	2209200000	116190000	109940000	95332000	120080000	139400000	105840000	113860000	108080000	95736000	102030000	31884000	42805000	79541000	99567000	102450000	135700000	132430000	132970000	110750000	92189000	120210000	95052000	92715000	110630000	66763000	57990000	71367000	92711000
Q60930	Q60930	Voltage-dependent anion-selective channel protein 2	Vdac2	31.732	2188400000	106190000	33106000	114780000	42248000	115640000	139390000	147600000	120590000	90563000	77339000	27885000	104710000	178890000	130790000	113570000	58716000	140910000	54961000	86233000	100740000	147390000	102370000	94612000	86426000	53702000	98368000	142980000	117840000
Q8BKS9	Q8BKS9	Pumilio domain-containing protein KIAA0020	Kiaa0020	72.799	2187100000	44346000	74034000	86904000	93990000	245540000	294030000	97380000	46920000	102730000	61554000	4338200	75073000	72519000	19622000	83377000	101920000	77002000	162850000	138990000	115230000	140420000	90719000	97560000	98209000	9778200	66328000	59366000	60326000
P68254	P68254	14-3-3 protein theta	Ywhaq	27.778	2185900000	67242000	58302000	97415000	36620000	128010000	135300000	123460000	82659000	79079000	102030000	54107000	131320000	113930000	124790000	72812000	70898000	115570000	60884000	93191000	97747000	118440000	93045000	80674000	100280000	95494000	108730000	105370000	128950000
Q6A068;A0A1W2P7S8;A0A1W2P7Z8;A0A1W2P7H4;A0A1W2P855;A0A1W2P6Q8	Q6A068;A0A1W2P7S8;A0A1W2P7Z8;A0A1W2P7H4;A0A1W2P855;A0A1W2P6Q8	Cell division cycle 5-like protein	Cdc5l	92.188	2181000000	139530000	97871000	78069000	55052000	118120000	136760000	78116000	83760000	89933000	60866000	130090000	108790000	107390000	105180000	111720000	102640000	99600000	76643000	90606000	78223000	74005000	103730000	101130000	84702000	138320000	112820000	96399000	91535000
Q9WTX5	Q9WTX5	S-phase kinase-associated protein 1	Skp1	18.672	2173000000	115360000	93331000	72656000	66820000	115050000	114610000	59098000	101510000	80415000	70933000	83317000	137840000	111120000	110610000	110110000	112520000	115240000	81696000	74617000	77358000	68121000	105090000	84983000	81461000	125950000	110140000	99185000	102550000
Q61595	Q61595	Kinectin	Ktn1	152.59	2168200000	109840000	62197000	126800000	36258000	117080000	255690000	77184000	103490000	95708000	76064000	40035000	51237000	61512000	55291000	100420000	95554000	169470000	69464000	90880000	93210000	97599000	98125000	90778000	93043000	84486000	57521000	70946000	58725000
O35286	O35286	Pre-mRNA-splicing factor ATP-dependent RNA helicase DHX15	Dhx15	91.006	2164000000	73649000	58833000	60821000	73846000	120620000	172100000	98175000	87998000	93768000	87584000	18990000	135700000	106990000	100890000	81276000	79729000	75626000	99158000	91449000	95043000	108880000	85607000	92250000	92630000	52444000	118270000	96563000	100490000
Q3THK7	Q3THK7	GMP synthase [glutamine-hydrolyzing]	Gmps	76.723	2162200000	47072000	45392000	54320000	85151000	148010000	158440000	123580000	90103000	100600000	83632000	19211000	50525000	99315000	57502000	65805000	76218000	80836000	93675000	94059000	106350000	104790000	91077000	95053000	90217000	60074000	55453000	69714000	73169000
Q8CDN6	Q8CDN6	Thioredoxin-like protein 1	Txnl1	32.237	2161600000	59619000	59194000	99490000	78093000	158970000	155430000	104820000	72455000	100990000	81050000	39732000	72011000	74093000	96275000	75785000	83707000	108590000	92684000	107260000	106000000	98101000	84171000	100750000	90391000	68084000	64816000	67267000	82698000
P43247	P43247	DNA mismatch repair protein Msh2	Msh2	104.15	2158600000	59673000	31138000	99642000	91528000	125750000	255110000	141390000	80080000	74928000	83099000	4224400	59550000	82399000	54355000	75727000	63433000	115100000	131040000	94399000	142600000	118770000	89397000	84427000	97894000	10597000	52789000	65526000	66404000
P07356	P07356	Annexin A2	Anxa2	38.676	2152500000	168850000	127710000	45709000	38215000	152970000	45578000	88250000	86347000	88532000	89732000	8663700	16661000	24999000	46228000	142470000	142540000	67817000	68573000	111450000	42584000	90911000	83552000	89524000	102190000	23089000	30607000	30317000	43527000
Q9D1M4	Q9D1M4	Eukaryotic translation elongation factor 1 epsilon-1	Eef1e1	19.859	2136600000	81628000	51943000	96083000	51837000	127370000	126520000	138060000	90949000	79518000	108450000	41138000	72287000	93549000	106540000	83019000	70355000	103840000	81513000	103140000	90783000	118970000	92515000	88332000	93496000	66496000	69330000	81979000	81982000
Q8JZK9;P54869	Q8JZK9	Hydroxymethylglutaryl-CoA synthase, cytoplasmic	Hmgcs1	57.568	2132600000	43186000	24990000	43813000	81360000	164420000	118480000	98955000	96541000	59542000	95831000	23463000	86447000	81776000	60032000	49584000	42858000	72463000	97380000	105550000	84195000	93340000	85366000	92488000	103820000	35109000	70755000	64907000	74261000
Q8R1B4	Q8R1B4	Eukaryotic translation initiation factor 3 subunit C	Eif3c	105.53	2131000000	28746000	58532000	56168000	42100000	172140000	145890000	91144000	72129000	74155000	74759000	15170000	60244000	85530000	47462000	45910000	69510000	67720000	89630000	105140000	91253000	100940000	79486000	85364000	93416000	33724000	54514000	87024000	66602000
Q6P5B0	Q6P5B0	RRP12-like protein	Rrp12	143.13	2129100000	32880000	55442000	20667000	72498000	209620000	158530000	176470000	47667000	99211000	78647000	9324700	91950000	51752000	50448000	66052000	72281000	47679000	125350000	131920000	82117000	130890000	79338000	96065000	92119000	29078000	77822000	65334000	67769000
Q9CZD3	Q9CZD3	Glycine--tRNA ligase	Gars	81.877	2120400000	38283000	26511000	38923000	44625000	132160000	130790000	59658000	107700000	77036000	58636000	23736000	94331000	98110000	90648000	27400000	56521000	72292000	68071000	99879000	80607000	66613000	97609000	83221000	93431000	64336000	95263000	95901000	107900000
P62320	P62320	Small nuclear ribonucleoprotein Sm D3	Snrpd3	13.916	2118600000	139810000	74883000	104610000	53162000	111670000	156700000	143440000	99882000	73724000	108860000	85174000	59439000	71981000	93623000	105840000	111090000	109440000	70653000	92920000	100680000	125180000	76318000	91687000	99499000	77350000	69109000	85026000	84752000
Q9R0L6	Q9R0L6	Pericentriolar material 1 protein	Pcm1	228.84	2118200000	146990000	106780000	75416000	79809000	107370000	80542000	65875000	110720000	73772000	61160000	136910000	95460000	103050000	77713000	114630000	127700000	98488000	113170000	81028000	73467000	62801000	97839000	90371000	91346000	161730000	99562000	104890000	91893000
Q9ERL7	Q9ERL7	Glia maturation factor gamma	Gmfg	16.748	2097300000	66165000	59725000	71916000	76484000	146180000	128770000	84428000	68206000	99176000	58809000	54517000	95070000	82420000	64703000	55002000	71487000	92339000	86459000	94734000	79261000	76820000	69503000	88115000	69242000	86036000	72913000	70639000	75683000
P31230	P31230	Aminoacyl tRNA synthase complex-interacting multifunctional protein 1;Endothelial monocyte-activating polypeptide 2	Aimp1	33.997	2097000000	122180000	60012000	80390000	62814000	86416000	121750000	81448000	90252000	84206000	74249000	62220000	105070000	76612000	64408000	123010000	76988000	96390000	89221000	85429000	91573000	89842000	93596000	84916000	83144000	84752000	89459000	80071000	68928000
Q3TKT4;Q6DIC0	Q3TKT4	Transcription activator BRG1	Smarca4	181.43	2095500000	95537000	51405000	76611000	59142000	115730000	205170000	83516000	91186000	86857000	80459000	27925000	142620000	119490000	140060000	94565000	72401000	89573000	89752000	82602000	117620000	87108000	88712000	93412000	86074000	41891000	111360000	89355000	104230000
Q99M31	Q99M31	Heat shock 70 kDa protein 14	Hspa14	54.65	2083200000	83589000	95555000	85657000	102830000	178800000	148500000	76102000	74367000	84711000	82880000	13032000	54826000	55586000	38547000	92133000	79581000	94984000	120020000	100030000	108130000	72632000	87466000	89221000	78356000	40831000	53728000	66772000	55765000
Q8BI22	Q8BI22	Centrosomal protein of 128 kDa	Cep128	128.5	2079500000	118030000	77620000	53830000	33640000	62028000	93089000	15453000	107040000	77510000	74727000	260830000	167860000	154010000	188400000	109760000	107180000	80184000	51952000	56858000	61193000	33759000	87534000	99889000	87179000	310910000	141430000	126130000	149260000
P57780;Q7TPR4;Q9JI91;O88990;E9PX29	P57780	Alpha-actinin-4	Actn4	104.98	2066800000	81489000	42197000	24528000	14568000	63257000	47568000	50393000	101560000	84039000	58555000	303260000	192150000	236140000	211450000	77138000	76524000	47216000	39484000	47864000	45972000	72824000	87612000	82324000	78365000	351140000	133510000	179340000	166080000
E9PVA8	E9PVA8		Gcn1l1	293.02	2066600000	47417000	42146000	67677000	82245000	164070000	178930000	70663000	90710000	90352000	78460000	4938000	64920000	93140000	56956000	59084000	20988000	65737000	120910000	104990000	139670000	123290000	101530000	96874000	101040000	15956000	71016000	106230000	80841000
Q8C3J5	Q8C3J5	Dedicator of cytokinesis protein 2	Dock2	211.7	2056300000	70531000	33105000	52669000	53868000	128470000	226230000	80731000	87058000	81189000	72745000	33237000	152720000	135680000	120140000	90101000	66863000	89786000	82775000	76997000	127870000	78078000	91663000	87206000	84015000	57042000	120560000	109940000	107440000
P54276	P54276	DNA mismatch repair protein Msh6	Msh6	151.08	2053100000	56320000	79765000	68210000	99221000	154320000	221760000	88642000	80727000	72996000	71231000	4049200	64494000	68329000	53801000	79843000	76849000	94626000	107780000	97394000	134290000	100050000	86292000	91246000	88705000	6180300	72428000	74931000	75547000
P11440	P11440	Cyclin-dependent kinase 1	Cdk1	34.106	2053000000	77486000	59632000	70013000	105840000	142220000	144900000	109560000	85230000	70336000	74935000	12463000	42842000	70595000	42641000	88555000	78214000	79977000	123440000	102610000	98234000	100030000	101340000	82839000	84747000	33205000	47250000	60956000	53264000
O08784	O08784	Treacle protein	Tcof1	135	2043800000	94150000	81530000	119090000	31847000	58218000	165850000	70903000	96304000	73494000	84347000	112650000	140040000	156620000	177840000	86897000	103860000	146950000	59140000	62202000	100860000	82874000	88276000	82099000	100050000	126590000	119400000	129740000	158230000
P42209;Q9Z2Q6;P28661	P42209	Septin-1	2001-09-01	42.019	2043500000	40319000	99256000	99379000	103090000	143460000	264450000	75470000	65561000	115520000	92018000	12017000	27858000	44119000	45892000	70635000	102020000	102520000	111490000	117640000	138360000	76848000	71244000	97935000	83249000	47895000	40315000	48539000	61419000
Q9D0I8	Q9D0I8	mRNA turnover protein 4 homolog	Mrto4	27.545	2028800000	141250000	74158000	73742000	99025000	142700000	78387000	129300000	57860000	91880000	68318000	39699000	71264000	83501000	53271000	102240000	91141000	69443000	105670000	101130000	80675000	104450000	77443000	78009000	76206000	70415000	59601000	67025000	46156000
Q91Z40;Q61107;A9YVJ5;Q000W5;A0A0G2JDV3;Q8BTS3	Q91Z40		Gbp7	72.72	2027500000	43572000	49956000	49127000	40768000	150100000	133620000	82576000	114360000	117710000	49739000	96411000	84432000	149120000	87241000	68713000	66704000	109660000	62244000	80981000	96127000	73580000	97216000	98790000	72509000	120590000	79624000	131000000	96197000
Q9CS42	Q9CS42	Ribose-phosphate pyrophosphokinase 2	Prps2	34.786	2026600000	74617000	42851000	57510000	87599000	140610000	202380000	80335000	77275000	79396000	55353000	27201000	50672000	54707000	40560000	56216000	50080000	60412000	89463000	76178000	91889000	76292000	63621000	71803000	71940000	41654000	37872000	43935000	46167000
Q8CIN4;Q61036	Q8CIN4	Serine/threonine-protein kinase PAK 2;PAK-2p27;PAK-2p34	Pak2	57.93	2015100000	91776000	56282000	61754000	64210000	122890000	175120000	104840000	86251000	71958000	84205000	44577000	63269000	62603000	65639000	87414000	78430000	90863000	103290000	92439000	115800000	107250000	83595000	83354000	84062000	60896000	60473000	62237000	60072000
O55142	O55142	60S ribosomal protein L35a	Rpl35a	12.554	2012700000	68956000	38991000	58243000	73684000	141040000	228600000	103360000	83926000	93413000	90438000	25174000	62904000	73001000	66363000	66679000	50080000	71046000	127890000	97757000	146360000	81070000	88931000	88557000	81229000	49625000	62804000	59025000	54597000
O88441	O88441	Metaxin-2	Mtx2	29.758	2012300000	112920000	71757000	72576000	68142000	119660000	137060000	84526000	90270000	94861000	55309000	35853000	114050000	118980000	93407000	107420000	86837000	84765000	79995000	84952000	96001000	81373000	78306000	84441000	64427000	43427000	90498000	110340000	97999000
Q62425	Q62425	Cytochrome c oxidase subunit NDUFA4	Ndufa4	9.3267	2011400000	126610000	76890000	85679000	51562000	108660000	180910000	122400000	85729000	69783000	67542000	49434000	60038000	74843000	81273000	123720000	110600000	119880000	55298000	73176000	125170000	124340000	76378000	81511000	86980000	68668000	72697000	90209000	83735000
P45376	P45376	Aldose reductase	Akr1b1	35.732	2011100000	32392000	45624000	40177000	37421000	127340000	127470000	78226000	97537000	88122000	81642000	68378000	116820000	80175000	110580000	46990000	60463000	67121000	61177000	91132000	83102000	84641000	86871000	94405000	85919000	96977000	95866000	77825000	117780000
Q6ZWX6	Q6ZWX6	Eukaryotic translation initiation factor 2 subunit 1	Eif2s1	36.108	1996200000	71970000	21289000	53657000	33190000	73156000	136130000	124560000	80964000	87924000	57154000	27836000	128900000	105730000	77859000	60779000	43856000	80579000	61149000	81290000	78339000	105610000	82014000	102050000	70869000	47838000	90190000	94567000	85206000
P23116	P23116	Eukaryotic translation initiation factor 3 subunit A	Eif3a	161.93	1993500000	31951000	39254000	41282000	54325000	185600000	75591000	88185000	101130000	64838000	87452000	14175000	46807000	102730000	48134000	49692000	63818000	58769000	98610000	101690000	77672000	88466000	103570000	84155000	80921000	40412000	51002000	86895000	58503000
Q8CIH5	Q8CIH5	1-phosphatidylinositol 4,5-bisphosphate phosphodiesterase gamma-2	Plcg2	147.59	1983400000	41948000	30701000	60040000	53712000	128470000	146600000	145760000	68484000	78053000	57797000	2474000	26920000	34010000	33266000	62087000	45654000	71216000	92641000	100580000	94781000	130190000	84899000	88005000	85253000	7472800	42713000	44237000	42339000
Q9EQ32	Q9EQ32	Phosphoinositide 3-kinase adapter protein 1	Pik3ap1	90.927	1981400000	65674000	86970000	85056000	85087000	146740000	134170000	129020000	83065000	96370000	79076000	6062600	15383000	27978000	16720000	91500000	109810000	106680000	100720000	107740000	97091000	119240000	83567000	85458000	83785000	25251000	25206000	31602000	29476000
Q9QYI3	Q9QYI3	DnaJ homolog subfamily C member 7	Dnajc7	56.475	1980200000	52399000	49376000	65047000	55611000	132600000	162180000	94742000	105060000	89732000	85423000	30290000	56961000	74488000	65766000	79231000	81614000	101610000	95905000	86529000	92691000	94624000	87673000	87158000	83929000	47102000	63932000	58857000	68545000
O35226	O35226	26S proteasome non-ATPase regulatory subunit 4	Psmd4	40.703	1970100000	66609000	63582000	89111000	73805000	148150000	127460000	81173000	38918000	91762000	86576000	23569000	61320000	67557000	65830000	60472000	72264000	103800000	109090000	98503000	73013000	80326000	69539000	86144000	93764000	46208000	52347000	58510000	62433000
Q8R3N1	Q8R3N1	Nucleolar protein 14	Nop14	98.768	1967700000	67486000	81078000	35261000	112260000	181980000	99406000	152700000	75900000	81955000	57273000	16441000	64712000	35665000	31156000	71894000	80558000	67613000	120390000	104280000	73737000	158380000	80579000	77572000	89500000	21024000	50416000	45464000	45211000
P62874;Q61011	P62874	Guanine nucleotide-binding protein G(I)/G(S)/G(T) subunit beta-1	Gnb1	37.377	1967100000	115640000	46690000	36845000	38096000	100590000	94098000	65212000	85068000	76744000	80776000	94486000	181410000	178250000	177600000	91837000	65659000	43811000	54882000	68394000	62312000	55598000	80545000	72822000	79290000	119980000	144310000	142860000	147920000
Q9CX56	Q9CX56	26S proteasome non-ATPase regulatory subunit 8	Psmd8	39.93	1967100000	83914000	51303000	67076000	94108000	108170000	108700000	68065000	93413000	78676000	68402000	30370000	63660000	68647000	46459000	87839000	72793000	74860000	129560000	84317000	80263000	70717000	96669000	81832000	79714000	53000000	59945000	59954000	59366000
Q9D8U8	Q9D8U8	Sorting nexin-5	Snx5	46.797	1949600000	77667000	63709000	55594000	29065000	122420000	152680000	48330000	71997000	99422000	49781000	42167000	76010000	88326000	72606000	60959000	67856000	92215000	61427000	89359000	91488000	74557000	86880000	91343000	78346000	82659000	75551000	84214000	78526000
O08539;D3Z6Q9;Q7TQF7	O08539	Myc box-dependent-interacting protein 1	Bin1	64.469	1946400000	37682000	49647000	77054000	47954000	127530000	163710000	69785000	53846000	78439000	69931000	74593000	77555000	73919000	83166000	61979000	67058000	102230000	65474000	90459000	90878000	81232000	75545000	76448000	80733000	86371000	69725000	61175000	85237000
Q922Q2	Q922Q2	Serine/threonine-protein kinase RIO1	Riok1	64.91	1945000000	58416000	53480000	70526000	58913000	126580000	119700000	99625000	98933000	103800000	114140000	104830000	19142000	109780000	88713000	94825000	81724000	106130000	72689000	107930000	110730000	104370000	81716000	79839000	102840000	79570000	66275000	66452000	64691000
Q9JHU4	Q9JHU4	Cytoplasmic dynein 1 heavy chain 1	Dync1h1	532.04	1933200000	28735000	15764000	40667000	60944000	168930000	140470000	78608000	91066000	77228000	62890000	12875000	57953000	142100000	39483000	41539000	31302000	64885000	79988000	100610000	95496000	78568000	82209000	91774000	80251000	15720000	66952000	104410000	55984000
P13439	P13439	Uridine 5-monophosphate synthase;Orotate phosphoribosyltransferase;Orotidine 5-phosphate decarboxylase	Umps	52.292	1932300000	50975000	28976000	44145000	107390000	145490000	175340000	70753000	76173000	76365000	63916000	6805700	51728000	54782000	41547000	58692000	54695000	72423000	155500000	90522000	89576000	91217000	84133000	79756000	74957000	10832000	48679000	60673000	46759000
Q80X41	Q80X41	Serine/threonine-protein kinase VRK1	Vrk1	49.74	1926900000	89477000	69717000	77567000	34614000	82566000	121350000	96531000	53448000	86252000	84263000	55606000	128270000	107530000	133290000	89103000	76057000	97931000	56409000	70524000	97844000	87806000	77751000	93238000	76868000	91585000	105140000	101590000	97895000
Q9R190	Q9R190	Metastasis-associated protein MTA2	Mta2	75.029	1926600000	72212000	23065000	19063000	37847000	100210000	149550000	79187000	65572000	67701000	32867000	38693000	189490000	171170000	195870000	73408000	44516000	59754000	69510000	68271000	82197000	72733000	80509000	85578000	81762000	81681000	140090000	121060000	160290000
Q99MR6	Q99MR6	Serrate RNA effector molecule homolog	Srrt	100.45	1922800000	75907000	60814000	74775000	51100000	113920000	161700000	73910000	101950000	78079000	72370000	61903000	67265000	105190000	78538000	74221000	89793000	122990000	60695000	76111000	93034000	77010000	82615000	82760000	94117000	71749000	69719000	88995000	74818000
Q9JKP5;Q8C181;Q8R003	Q9JKP5;Q8C181	Muscleblind-like protein 1;Muscleblind-like protein 2	Mbnl1;Mbnl2	36.975	1920700000	74189000	62345000	56226000	98367000	120900000	205210000	58228000	107730000	85701000	58414000	48052000	87789000	76524000	55418000	75980000	54996000	74779000	96641000	69394000	97035000	75827000	68681000	71472000	76256000	60047000	60459000	64600000	65172000
Q3V3R1	Q3V3R1	Monofunctional C1-tetrahydrofolate synthase, mitochondrial	Mthfd1l	105.73	1908100000	54427000	16699000	51941000	52763000	66329000	133600000	79464000	86883000	79606000	80659000	49977000	119340000	213980000	122840000	68778000	45086000	71276000	83819000	61643000	92407000	83219000	79826000	70915000	85968000	71386000	98185000	150370000	108790000
Q76MZ3	Q76MZ3	Serine/threonine-protein phosphatase 2A 65 kDa regulatory subunit A alpha isoform	Ppp2r1a	65.322	1883000000	35577000	34225000	41261000	22348000	170820000	104330000	59250000	90966000	71658000	69469000	50485000	109470000	144970000	83102000	44464000	43853000	69500000	51254000	97537000	74290000	70167000	82313000	74487000	77642000	79385000	93785000	132620000	101200000
Q9D0R8	Q9D0R8	Protein LSM12 homolog	Lsm12	21.701	1873800000	111780000	99662000	70583000	53528000	93931000	32512000	71006000	55491000	74164000	107370000	125830000	97435000	97123000	79100000	103930000	111200000	79201000	78384000	72212000	49579000	64204000	68927000	80292000	88036000	200220000	81084000	85385000	83546000
Q6PDI5	Q6PDI5	Proteasome-associated protein ECM29 homolog	Ecm29	203.7	1871500000	42032000	10915000	21741000	78107000	138200000	177900000	87856000	79318000	87420000	69104000	3080400	43039000	126150000	62587000	44038000	32257000	64922000	94976000	85284000	110480000	93640000	72221000	76390000	83661000	6613300	49253000	112290000	64009000
P53996;Q9D548	P53996	Cellular nucleic acid-binding protein	Cnbp	19.592	1870100000	77275000	32723000	63788000	24570000	102110000	147690000	104580000	62707000	69260000	47311000	78419000	142540000	96033000	141360000	77473000	53182000	83230000	38385000	67277000	92547000	92741000	68825000	75632000	77946000	105210000	117800000	120860000	121680000
Q9D8W5	Q9D8W5	26S proteasome non-ATPase regulatory subunit 12	Psmd12	52.895	1866100000	27279000	40734000	41001000	72173000	143020000	115020000	85240000	64859000	67330000	64524000	11532000	53492000	71980000	53933000	38976000	57324000	63722000	103340000	98152000	67605000	71961000	79110000	68497000	76759000	23597000	57451000	63742000	55177000
Q3U821	Q3U821		Wdr75	94.036	1865500000	114430000	31326000	35463000	162970000	135630000	119110000	90986000	132980000	52710000	46575000	8326300	25978000	37410000	31384000	81701000	63135000	49747000	151990000	83115000	64379000	97498000	104400000	77330000	74971000	24083000	49657000	48699000	59304000
Q61171	Q61171	Peroxiredoxin-2	Prdx2	21.778	1856600000	59363000	83650000	33893000	29020000	122760000	146930000	103380000	91637000	95407000	78679000	41561000	82326000	77932000	98652000	59783000	97758000	90579000	45442000	74881000	91928000	88514000	72140000	75473000	89478000	81415000	83336000	75203000	116540000
Q9CR16	Q9CR16	Peptidyl-prolyl cis-trans isomerase D	Ppid	40.742	1855100000	93601000	36838000	56477000	36832000	114920000	97001000	107780000	88477000	73607000	62197000	34443000	65825000	138550000	61028000	47214000	49634000	85550000	54485000	90700000	68234000	104830000	88194000	73281000	76808000	65938000	71567000	78071000	81932000
Q80VW7	Q80VW7	AT-hook-containing transcription factor	Akna	153.12	1854600000	110560000	60798000	37960000	19367000	34386000	59422000	14923000	90841000	81667000	75103000	344510000	154000000	141240000	153400000	112050000	71787000	60608000	35893000	42591000	54208000	22138000	75679000	73857000	80698000	389620000	132550000	115470000	133330000
P54071	P54071	Isocitrate dehydrogenase [NADP], mitochondrial	Idh2	50.906	1849000000	66109000	54653000	48440000	51717000	148800000	131460000	96706000	104660000	61935000	74072000	16515000	46188000	62227000	53713000	61069000	76999000	64084000	73052000	88067000	88401000	109840000	76679000	74151000	93109000	24621000	54206000	67495000	63011000
P35601	P35601	Replication factor C subunit 1	Rfc1	125.98	1841900000	101510000	71885000	88265000	59274000	113570000	154990000	74290000	64348000	82168000	63212000	21887000	77121000	82706000	66555000	93110000	97058000	107670000	78940000	83477000	101780000	74342000	81243000	78289000	76096000	43230000	77476000	73176000	75170000
O54825	O54825	Bystin	Bysl	49.783	1820200000	49860000	62591000	71220000	60799000	86695000	150380000	77370000	129710000	90542000	87632000	12007000	95821000	43109000	55909000	78594000	95829000	67917000	99494000	92485000	60503000	101140000	73985000	66054000	67895000	33366000	45881000	41227000	35444000
B2RY56	B2RY56	RNA-binding protein 25	Rbm25	99.551	1808400000	78685000	92613000	108400000	21423000	124080000	161460000	61475000	61614000	75976000	67982000	44159000	89165000	74864000	49338000	94108000	101070000	112450000	64322000	76817000	102460000	74788000	71302000	81109000	75601000	75229000	71667000	70320000	62075000
Q6P5D4	Q6P5D4	Centrosomal protein of 135 kDa	Cep135	133.34	1800800000	123650000	81073000	42938000	24457000	58824000	57367000	24999000	90147000	83398000	55159000	284320000	111400000	106710000	93831000	88490000	100060000	85885000	59149000	55015000	56490000	36315000	78436000	74183000	80507000	279050000	119070000	98292000	96912000
P60766	P60766	Cell division control protein 42 homolog	Cdc42	21.258	1800600000	46779000	37595000	56962000	34141000	79913000	84119000	74801000	104010000	92919000	65956000	100140000	109310000	114360000	126520000	50156000	49514000	74277000	49075000	63441000	66001000	79117000	99264000	62054000	79623000	132070000	111360000	107260000	131040000
Q8CGP0;Q9D2U9;Q64524	Q8CGP0;Q9D2U9;Q64524	Histone H2B type 3-B;Histone H2B type 3-A;Histone H2B type 2-E	Hist3h2bb;Hist3h2ba;Hist2h2be	13.908	1796700000	146880000	127260000	61720000	21525000	84781000	101630000	39592000	108980000	101550000	74210000	135080000	70778000	104520000	101440000	143030000	142920000	82751000	54375000	59702000	76411000	42557000	93276000	99552000	75602000	179760000	34134000	92077000	106230000
O08585	O08585	Clathrin light chain A	Clta	25.604	1794800000	104310000	69233000	115910000	53919000	73531000	188100000	106990000	61037000	45042000	81001000	45496000	48391000	119460000	69575000	112650000	102260000	109740000	85759000	77197000	88898000	96252000	70931000	57583000	83706000	96515000	58589000	84096000	73106000
Q6P9L6	Q6P9L6	Kinesin-like protein KIF15	Kif15	160.12	1793700000	40539000	52237000	104350000	46044000	158140000	136570000	74467000	39344000	88845000	63034000	7004100	31696000	53167000	24565000	54410000	78241000	109210000	90203000	94834000	87353000	75085000	64980000	84686000	75588000	11176000	42583000	54587000	45458000
Q01768	Q01768	Nucleoside diphosphate kinase B	Nme2	17.363	1783800000	23021000	47503000	63387000	11132000	44679000	60056000	146200000	60094000	80618000	78217000	112540000	212890000	128090000	217170000	44675000	52892000	91540000	17782000	27325000	62345000	130290000	56832000	77803000	78158000	130470000	153760000	140650000	174960000
Q9CQM9	Q9CQM9	Glutaredoxin-3	Glrx3	37.778	1782100000	81096000	63140000	85430000	68017000	85187000	100250000	93082000	116080000	76818000	59679000	34316000	39389000	42388000	52838000	64153000	60516000	102050000	87912000	79648000	78469000	92274000	98375000	78782000	59584000	63830000	54395000	68015000	64572000
Q99PT1	Q99PT1	Rho GDP-dissociation inhibitor 1	Arhgdia	23.407	1779200000	60867000	62366000	46654000	26443000	81522000	78111000	64931000	80072000	69265000	53454000	117470000	180340000	120580000	173930000	58909000	78926000	55237000	40585000	54070000	63935000	62171000	74592000	75404000	71543000	170220000	144490000	113830000	166690000
O08553;P97427;Q62188	O08553	Dihydropyrimidinase-related protein 2	Dpysl2	62.277	1770900000	38795000	29952000	50734000	24856000	72047000	120380000	63211000	83621000	66680000	55849000	125200000	144420000	111020000	129520000	42020000	51378000	73350000	41005000	68157000	72151000	71214000	71047000	78282000	66765000	137080000	115420000	101170000	136410000
P05977	P05977	Myosin light chain 1/3, skeletal muscle isoform	Myl1	20.594	1767200000	49734000	106390000	56589000	0	71453000	108940000	21844000	0	72394000	103050000	81875000	179580000	143420000	240040000	49734000	135620000	74195000	0	52965000	78954000	22705000	0	74313000	116380000	113800000	166170000	136440000	246000000
Q9QXS1	Q9QXS1	Plectin	Plec	534.18	1762300000	155610000	58042000	297390000	71210000	3698000	242120000	90633000	97636000	3268500	7710200	144640000	14639000	872060	180500000	97927000	40348000	316420000	105820000	45703000	111830000	66013000	47750000	44804000	9177900	314280000	22325000	5524800	208210000
Q91YQ5	Q91YQ5	Dolichyl-diphosphooligosaccharide--protein glycosyltransferase subunit 1	Rpn1	68.527	1749300000	21201000	36795000	47126000	13237000	56463000	77668000	139950000	65151000	81736000	65501000	23241000	91191000	214340000	93322000	32136000	52456000	64553000	22398000	44717000	56861000	118120000	71714000	86183000	89181000	42643000	73533000	172060000	85276000
Q9R0N0	Q9R0N0	Galactokinase	Galk1	42.295	1746700000	55631000	43893000	38304000	120610000	111510000	119140000	76267000	84603000	81512000	71865000	31571000	56234000	57461000	58576000	55115000	50449000	59102000	128220000	75092000	82103000	99092000	75753000	76507000	77103000	50632000	50724000	57518000	59571000
Q91WK2	Q91WK2	Eukaryotic translation initiation factor 3 subunit H	Eif3h	39.832	1745900000	38975000	32919000	51845000	37065000	120730000	107920000	61132000	70178000	69250000	72147000	43328000	53149000	66917000	81375000	39092000	48155000	84093000	57136000	78481000	59965000	69197000	70731000	69859000	80313000	49000000	52064000	77967000	62999000
P41241	P41241	Tyrosine-protein kinase CSK	Csk	50.716	1745000000	50042000	57218000	65202000	75937000	118600000	165280000	71599000	74656000	63181000	66479000	17565000	77142000	82762000	44871000	65702000	64433000	73811000	87392000	75882000	120530000	71413000	74347000	76323000	76440000	34515000	61790000	69527000	64871000
Q922Q8	Q922Q8	Leucine-rich repeat-containing protein 59	Lrrc59	34.877	1740600000	56105000	56946000	82468000	61425000	96069000	128570000	79083000	85819000	79451000	62520000	45913000	92822000	95736000	63107000	99018000	66741000	93249000	52127000	76819000	84216000	78134000	75601000	78497000	72498000	73070000	81821000	89504000	74218000
Q8VHZ7	Q8VHZ7	U3 small nucleolar ribonucleoprotein protein IMP4	Imp4	33.656	1738800000	72988000	57618000	24308000	64786000	136640000	105220000	112810000	84781000	64430000	74706000	26394000	59320000	47443000	61010000	69847000	73787000	62547000	92883000	80562000	64721000	106790000	71777000	64497000	71116000	53406000	52524000	52512000	50163000
Q9QWT9	Q9QWT9	Kinesin-like protein KIFC1	Kifc1	74.152	1730500000	103130000	36731000	80885000	83541000	94253000	153270000	85967000	51436000	73935000	63635000	24075000	67721000	66790000	95574000	91758000	81663000	85434000	85373000	84131000	84707000	77228000	76824000	84414000	72552000	62154000	70628000	67609000	76273000
Q8BFZ9	Q8BFZ9	Erlin-2	Erlin2	37.872	1727100000	9622000	53754000	73392000	64624000	115040000	109720000	143980000	35836000	66782000	55285000	2397500	26580000	34113000	26245000	25079000	60028000	87412000	75819000	75839000	82490000	150150000	64878000	81799000	74007000	8041600	31295000	36601000	28185000
Q9Z1D1	Q9Z1D1	Eukaryotic translation initiation factor 3 subunit G	Eif3g	35.638	1720900000	48455000	34683000	52830000	71717000	117940000	96043000	69882000	82644000	72432000	81630000	30967000	43476000	49137000	42481000	49363000	59625000	76977000	66901000	75065000	50552000	77514000	70820000	67638000	78771000	56503000	50597000	58919000	60296000
Q9WV32;Q9R0Q6	Q9WV32	Actin-related protein 2/3 complex subunit 1B	Arpc1b	41.063	1714400000	31254000	31871000	49235000	46536000	110870000	91843000	67794000	84539000	76099000	51182000	43748000	90409000	61424000	74633000	52022000	49525000	69354000	61250000	82752000	91596000	60198000	87464000	77856000	55171000	61760000	70805000	58911000	62434000
Q91VN4	Q91VN4	MICOS complex subunit Mic25	Chchd6	29.852	1711800000	90503000	69699000	87488000	18083000	94993000	107550000	39217000	93303000	59726000	47413000	12142000	81549000	129990000	116000000	82044000	83601000	120250000	39719000	60993000	68561000	57501000	74054000	83349000	81586000	37095000	81861000	113400000	114970000
Q8BKC5	Q8BKC5	Importin-5	Ipo5	123.59	1711200000	58513000	39770000	50033000	38749000	92936000	140560000	51535000	83223000	62362000	54898000	15083000	80073000	304230000	98952000	69045000	60200000	44350000	70399000	67134000	61529000	73371000	69609000	73160000	60307000	33440000	86282000	189120000	78518000
Q99NB9	Q99NB9	Splicing factor 3B subunit 1	Sf3b1	145.81	1701300000	61776000	31800000	50172000	39759000	88527000	140160000	86005000	91147000	84266000	56731000	26548000	113250000	93628000	105680000	70753000	63858000	64610000	63759000	82744000	84012000	75247000	71618000	76497000	60639000	57537000	93203000	82993000	89559000
Q9Z1X4	Q9Z1X4	Interleukin enhancer-binding factor 3	Ilf3	96.02	1701300000	76907000	92272000	80119000	29078000	108210000	120180000	85978000	92063000	71737000	65183000	49054000	68260000	95016000	44816000	84302000	103750000	90702000	60360000	77770000	96843000	82736000	76083000	72507000	78385000	63864000	77749000	75891000	55132000
P56399	P56399	Ubiquitin carboxyl-terminal hydrolase 5	Usp5	95.832	1695700000	27801000	42015000	64482000	37905000	122490000	153490000	92138000	77306000	81789000	62899000	16382000	50164000	47627000	80472000	52136000	56788000	95953000	73248000	81952000	82188000	78587000	74789000	72660000	81112000	40392000	48884000	57212000	62945000
Q9D903	Q9D903	Probable rRNA-processing protein EBP2	Ebna1bp2	34.702	1694900000	88543000	81146000	63909000	68812000	121220000	108450000	103040000	53191000	58710000	76733000	27790000	31863000	32527000	33674000	75603000	107410000	89119000	94950000	82980000	75593000	100120000	66908000	76406000	77187000	44196000	35862000	40369000	35530000
O08709;Q8BG37	O08709	Peroxiredoxin-6	Prdx6	24.87	1688800000	23490000	46351000	22248000	35304000	106710000	61016000	85740000	64033000	47055000	80392000	35331000	51755000	51923000	63719000	37306000	44828000	35220000	64083000	94351000	43181000	101020000	70665000	66981000	74011000	47209000	41526000	51084000	62042000
Q8CJF7	Q8CJF7	Protein ELYS	Ahctf1	247.64	1688700000	90831000	69742000	56507000	33761000	65416000	93489000	66200000	58323000	72158000	53226000	23159000	170050000	107500000	124250000	73786000	88244000	76488000	56431000	51039000	60002000	69963000	62488000	73618000	71953000	62944000	108760000	82995000	109120000
Q9D554	Q9D554	Splicing factor 3A subunit 3	Sf3a3	58.841	1682700000	87246000	64397000	57144000	15761000	80750000	105310000	47375000	87780000	72777000	80609000	58731000	137430000	136920000	98639000	77577000	76584000	79414000	43900000	66960000	63879000	64498000	74366000	69553000	73576000	96540000	104800000	107190000	92200000
P61982	P61982	14-3-3 protein gamma;14-3-3 protein gamma, N-terminally processed	Ywhag	28.302	1674400000	30884000	43222000	39778000	36551000	85141000	95096000	90439000	65068000	70411000	68319000	86745000	77344000	79083000	96374000	45137000	67905000	70668000	52184000	66169000	55049000	97641000	67021000	71929000	78443000	99739000	72331000	77287000	102030000
P47915;W4VSN7	P47915;W4VSN7	60S ribosomal protein L29	Rpl29;Gm3550	17.587	1670200000	111340000	81756000	96419000	66301000	102680000	126910000	57341000	89898000	83562000	62322000	53693000	33308000	35328000	30022000	115980000	112830000	100580000	97218000	73748000	85504000	61705000	89533000	85853000	67068000	80084000	27173000	45837000	29193000
P47757	P47757	F-actin-capping protein subunit beta	Capzb	31.345	1668000000	101420000	63385000	41714000	25184000	80579000	86014000	34810000	54959000	66578000	59564000	181900000	156300000	120020000	113480000	96280000	64161000	54285000	28638000	53880000	58741000	42727000	62577000	63909000	63204000	241530000	122000000	106940000	116980000
Q920Q6;Q61474	Q920Q6	RNA-binding protein Musashi homolog 2	Msi2	36.938	1665900000	78285000	72199000	91558000	35028000	124200000	196050000	56286000	59753000	66851000	68313000	38953000	57816000	65207000	67937000	92251000	91183000	107340000	46217000	74768000	105640000	63347000	71115000	65764000	68263000	51475000	56005000	67066000	61557000
Q61768	Q61768	Kinesin-1 heavy chain	Kif5b	109.55	1664500000	63957000	55996000	101930000	26371000	101420000	101410000	39181000	72183000	74247000	49206000	38839000	74852000	91195000	61926000	54210000	69311000	97408000	53979000	78623000	78553000	63532000	75051000	71728000	69199000	66172000	63549000	81392000	61568000
P16406	P16406	Glutamyl aminopeptidase	Enpep	107.96	1662500000	304730000	169340000	150890000	0	7345600	187740000	7191100	42855000	60603000	54142000	89846000	54251000	55854000	76775000	266660000	219180000	155970000	0	8227700	141770000	8376200	59673000	62061000	73081000	151320000	61228000	37551000	84952000
Q99L47	Q99L47	Hsc70-interacting protein	St13	41.655	1661600000	38260000	41695000	66794000	36406000	129740000	134970000	104740000	85294000	66925000	70757000	41555000	51466000	38774000	71066000	47825000	51764000	88400000	66391000	79670000	79834000	98466000	71863000	63190000	80000000	63734000	49083000	45621000	74553000
P00375	P00375	Dihydrofolate reductase	Dhfr	21.606	1660100000	69993000	39044000	67559000	74136000	148430000	102520000	78770000	69631000	81754000	69253000	42393000	4723700	36677000	9757900	65329000	56578000	82254000	108530000	93207000	61533000	96694000	61499000	80399000	75043000	47260000	19238000	42245000	31104000
Q9CYH6	Q9CYH6	Ribosome biogenesis regulatory protein homolog	Rrs1	41.551	1643900000	41312000	98800000	46901000	93479000	139960000	152040000	105650000	76653000	57427000	45627000	10337000	15104000	22437000	15055000	63396000	121900000	80464000	110360000	101270000	94467000	98006000	63089000	60867000	62745000	25391000	18675000	28982000	27262000
P63330	P63330	Serine/threonine-protein phosphatase 2A catalytic subunit alpha isoform	Ppp2ca	35.608	1638500000	51785000	44564000	54642000	61117000	87479000	120400000	62720000	70842000	69434000	65716000	48043000	70232000	84759000	72158000	64419000	49253000	66471000	70309000	71416000	72826000	67855000	74285000	67924000	67206000	78635000	59243000	78381000	71020000
Q3ULJ0;P13707;Q6NXY9	Q3ULJ0	Glycerol-3-phosphate dehydrogenase 1-like protein	Gpd1l	38.225	1638000000	56496000	10714000	62157000	57859000	111170000	160940000	86348000	74437000	58913000	76533000	53379000	54349000	90973000	62685000	70400000	26741000	76500000	76253000	71186000	95403000	67618000	72215000	72458000	72253000	73270000	58838000	77586000	67659000
O35326	O35326	Serine/arginine-rich splicing factor 5	Srsf5	30.891	1632500000	106070000	73089000	46361000	20180000	110470000	165300000	17219000	119800000	30747000	60279000	60667000	88450000	100870000	24030000	91333000	78155000	108830000	52259000	65906000	95111000	45261000	74948000	54337000	80026000	129740000	55296000	70879000	62830000
Q9CQC6	Q9CQC6	Basic leucine zipper and W2 domain-containing protein 1	Bzw1	48.043	1631900000	44737000	30904000	76534000	28034000	112420000	173430000	43477000	31715000	76977000	38282000	11591000	79685000	89939000	45928000	51844000	52929000	70577000	56975000	75696000	88220000	59442000	67771000	69171000	65514000	36013000	50018000	68574000	56982000
Q9QUG9	Q9QUG9	RAS guanyl-releasing protein 2	Rasgrp2	69.445	1621600000	64377000	24956000	28090000	59393000	99774000	95491000	83113000	54760000	74154000	91958000	17337000	60658000	52377000	61086000	61927000	45845000	45061000	71853000	75735000	69385000	86899000	56129000	78204000	87261000	32659000	59236000	61381000	57027000
P70333	P70333	Heterogeneous nuclear ribonucleoprotein H2	Hnrnph2	49.279	1620700000	102360000	60596000	57638000	76951000	106340000	197070000	70013000	72566000	64321000	50069000	23140000	37383000	39075000	35342000	77311000	59435000	61148000	70229000	60376000	93165000	61362000	53433000	51755000	45347000	32869000	42790000	35393000	35672000
Q3THK3	Q3THK3	General transcription factor IIF subunit 1	Gtf2f1	57.241	1619200000	107430000	34153000	60994000	4561000	52119000	88184000	37657000	73172000	81977000	58491000	49113000	165350000	160200000	142500000	86797000	33666000	86113000	9242300	35657000	48459000	35353000	57799000	56529000	61895000	70108000	107570000	101380000	102880000
Q9Z0H1	Q9Z0H1	WD repeat-containing protein 46	Wdr46	69.047	1614100000	45769000	51511000	21988000	90122000	138650000	78775000	98923000	76647000	62932000	71183000	20919000	56373000	38362000	48186000	53106000	67646000	34052000	107120000	83739000	62296000	118740000	66592000	67804000	69769000	34047000	54169000	43623000	52931000
Q9DCL9	Q9DCL9	Multifunctional protein ADE2;Phosphoribosylaminoimidazole-succinocarboxamide synthase;Phosphoribosylaminoimidazole carboxylase	Paics	47.006	1612900000	52696000	34611000	30449000	48352000	79879000	76444000	79041000	77033000	63591000	41384000	38644000	42188000	176620000	55818000	52753000	54308000	50386000	59508000	69060000	60192000	75242000	74360000	64857000	57500000	55316000	60448000	101580000	62630000
Q9D5T0	Q9D5T0	ATPase family AAA domain-containing protein 1	Atad1	40.744	1612300000	74550000	47912000	59458000	76100000	135700000	127990000	89117000	49492000	57489000	72075000	16809000	35274000	95486000	51300000	81062000	69112000	67872000	135180000	81209000	73978000	71764000	64081000	58588000	65159000	32095000	40918000	58377000	44925000
P97770	P97770	THUMP domain-containing protein 3	Thumpd3	56.431	1605600000	79436000	48349000	49658000	70105000	110650000	155850000	88455000	71317000	60919000	56944000	13673000	42715000	71710000	43360000	68122000	68729000	71473000	79347000	79108000	91743000	78358000	62856000	66638000	73272000	22261000	47960000	55192000	44544000
A3KGV1	A3KGV1	Outer dense fiber protein 2	Odf2	95.54	1603300000	44180000	43839000	34093000	10282000	47359000	48773000	17603000	49961000	86511000	65043000	284000000	174340000	103810000	171080000	54690000	67289000	53250000	17546000	59212000	36436000	26054000	75584000	72234000	77610000	260820000	125590000	106760000	129960000
P70349	P70349	Histidine triad nucleotide-binding protein 1	Hint1	13.777	1603100000	35430000	33194000	38464000	43501000	108220000	113700000	70235000	81301000	49207000	75631000	44365000	79041000	41679000	90750000	56626000	52801000	51792000	51916000	69888000	69939000	74304000	81891000	58274000	69041000	85816000	63539000	58139000	83964000
Q8BP47	Q8BP47	Asparagine--tRNA ligase, cytoplasmic	Nars	64.279	1594500000	29214000	18088000	39191000	68927000	134740000	133200000	84423000	81707000	63647000	47509000	23302000	56930000	53781000	38986000	49288000	45185000	60488000	89238000	84144000	77138000	71968000	71961000	62524000	61541000	31951000	51186000	45224000	45501000
P70388	P70388	DNA repair protein RAD50	Rad50	153.49	1591300000	50579000	60507000	84594000	38172000	123350000	125480000	73104000	85008000	81488000	55821000	10413000	51240000	56328000	31311000	65675000	87985000	94734000	76394000	69006000	70864000	66808000	59223000	73425000	66752000	19620000	49618000	51641000	51110000
P56959	P56959	RNA-binding protein FUS	Fus	52.673	1582600000	59765000	65165000	65468000	44614000	75505000	112810000	62957000	106080000	56846000	60034000	41599000	82194000	57603000	83055000	70786000	78733000	83420000	56704000	62830000	76249000	79803000	84165000	51790000	60255000	78365000	74201000	64800000	83408000
Q99J62	Q99J62	Replication factor C subunit 4	Rfc4	39.866	1578100000	78815000	63721000	80814000	26492000	128790000	156780000	41703000	52749000	73306000	84255000	36411000	48549000	43526000	39017000	89273000	80106000	72379000	110120000	69933000	60031000	46354000	49087000	73849000	66247000	80654000	59044000	53421000	45302000
Q6NVF9	Q6NVF9	Cleavage and polyadenylation specificity factor subunit 6	Cpsf6	59.152	1577500000	114310000	74460000	63385000	60937000	78692000	114070000	48108000	87700000	66039000	34317000	93295000	68053000	103830000	75332000	106590000	100030000	76761000	52328000	60974000	76856000	52008000	65346000	60579000	53691000	104790000	63116000	91646000	76568000
Q9DCX2	Q9DCX2	ATP synthase subunit d, mitochondrial	Atp5h	18.749	1576200000	38033000	38909000	89896000	18972000	89534000	111320000	115590000	43857000	54775000	70437000	66743000	93268000	85711000	110890000	48765000	53671000	71381000	46860000	58413000	70632000	71767000	78985000	66716000	66536000	81277000	80674000	113110000	85925000
Q9CQ43	Q9CQ43		Dut	17.384	1566200000	56934000	34336000	37231000	33075000	108770000	85101000	91931000	53953000	62391000	48056000	62925000	89517000	80835000	82007000	42329000	40027000	59375000	59489000	61527000	59073000	78740000	61275000	68547000	70320000	68272000	69512000	67591000	80392000
Q62093	Q62093	Serine/arginine-rich splicing factor 2	Srsf2	25.476	1561700000	108160000	76115000	30486000	10898000	105510000	168510000	11520000	40594000	60376000	45706000	172040000	90639000	103440000	89974000	60317000	60349000	96266000	50274000	47492000	51384000	59970000	61412000	40207000	94126000	171110000	64261000	60338000	60228000
P56183	P56183	Ribosomal RNA processing protein 1 homolog A	Rrp1	54.776	1561200000	63960000	67631000	53335000	60589000	114380000	88623000	102440000	68990000	58856000	63567000	29301000	31151000	44599000	28658000	64315000	82635000	59237000	87996000	84486000	52983000	93767000	72387000	62887000	64866000	57856000	40661000	40449000	35110000
P27870;Q9R0C8	P27870	Proto-oncogene vav	Vav1	98.136	1558100000	41461000	40651000	30520000	94895000	146220000	115140000	92130000	65801000	74985000	53900000	10479000	30884000	10490000	28169000	56488000	58297000	59221000	117740000	87305000	82537000	84345000	71091000	73526000	61822000	30011000	29610000	21315000	25513000
Q921N6	Q921N6	Probable ATP-dependent RNA helicase DDX27	Ddx27	85.938	1551100000	51149000	39520000	29491000	50553000	176560000	74581000	119940000	54528000	56852000	86643000	5226700	58720000	32281000	48274000	56910000	62890000	46840000	88091000	87084000	61202000	103200000	61048000	62505000	69254000	12216000	54746000	42478000	50306000
Q9R1K9;Q8K4K1;P41209	Q9R1K9	Centrin-2	Cetn2	19.796	1544700000	93953000	74316000	51400000	53604000	88565000	61231000	36091000	54741000	65034000	49958000	99774000	86953000	65937000	77407000	77436000	77363000	53487000	61119000	59507000	44057000	60073000	53965000	71577000	53974000	123740000	71024000	60045000	61763000
P97329	P97329	Kinesin-like protein KIF20A	Kif20a	99.875	1544300000	66947000	57708000	44434000	38360000	77841000	122800000	87951000	65495000	46200000	52770000	19998000	116340000	100750000	95434000	67977000	72611000	61370000	64360000	56582000	77035000	78380000	68575000	56236000	70369000	44938000	85121000	69626000	74700000
Q61210	Q61210	Rho guanine nucleotide exchange factor 1	Arhgef1	102.8	1540200000	37181000	37672000	30111000	63771000	137800000	123740000	68615000	53390000	45236000	38149000	11912000	28331000	48593000	43974000	62103000	62653000	57738000	78413000	81011000	79357000	66700000	62924000	51764000	52942000	41963000	42325000	57777000	48682000
Q9R1T2	Q9R1T2	SUMO-activating enzyme subunit 1;SUMO-activating enzyme subunit 1, N-terminally processed	Sae1	38.62	1531000000	18093000	34004000	64065000	41621000	105700000	77630000	38380000	77237000	82210000	52136000	38961000	57434000	60314000	58202000	38742000	54804000	64083000	55336000	76844000	54043000	53879000	77647000	60746000	60911000	65701000	59542000	55254000	65813000
O35648	O35648	Centrin-3	Cetn3	19.519	1529700000	77864000	82590000	44961000	31798000	94500000	70710000	46028000	42861000	68966000	63739000	109420000	90540000	64613000	79726000	75868000	99003000	63488000	67967000	63755000	50374000	46692000	58334000	65568000	63783000	130720000	73949000	55954000	68051000
Q63850	Q63850	Nuclear pore glycoprotein p62	Nup62	53.254	1527100000	58825000	48491000	70450000	45543000	117410000	126590000	43682000	77530000	53409000	52612000	15373000	36605000	42739000	22040000	61539000	61475000	82615000	52678000	75384000	73336000	73150000	63181000	57346000	64513000	36600000	30766000	35698000	36310000
Q9D0R4	Q9D0R4	Probable ATP-dependent RNA helicase DDX56	Ddx56	61.211	1526500000	37163000	61648000	37703000	86172000	150220000	108040000	108280000	74475000	47038000	53724000	5019400	42467000	36050000	29535000	53401000	74616000	52246000	98380000	102060000	50882000	83907000	68657000	69897000	56751000	8413200	45991000	38700000	39109000
P47754	P47754	F-actin-capping protein subunit alpha-2	Capza2	32.967	1522100000	86100000	49406000	39304000	18363000	52387000	74932000	43319000	85166000	72522000	56900000	172120000	131520000	113960000	124450000	86535000	70659000	53703000	28334000	45142000	54832000	44283000	68197000	69544000	65214000	201940000	107740000	90015000	108530000
P68368	P68368	Tubulin alpha-4A chain	Tuba4a	49.924	1521800000	41583000	54677000	9987300	36603000	145550000	108190000	134330000	79243000	55226000	44043000	32361000	26828000	35585000	47744000	54433000	58560000	40782000	63606000	78069000	59079000	107250000	60314000	63716000	63453000	35062000	32646000	38494000	35846000
Q921Y2	Q921Y2	U3 small nucleolar ribonucleoprotein protein IMP3	Imp3	21.777	1521600000	78489000	50942000	46598000	52447000	76740000	71056000	70016000	74835000	48565000	55353000	29182000	54635000	47138000	41662000	63507000	63201000	60882000	66593000	57085000	51499000	75498000	64001000	54794000	54343000	42910000	51323000	41228000	49740000
Q61024	Q61024	Asparagine synthetase [glutamine-hydrolyzing]	Asns	64.282	1516700000	7117000	1773100	3105700	40855000	171620000	49899000	22667000	81889000	49556000	76552000	11466000	55914000	39265000	53843000	7601700	6973300	5640000	59721000	111520000	48265000	30014000	101760000	53488000	48292000	10514000	52172000	44337000	42622000
Q00PI9	Q00PI9	Heterogeneous nuclear ribonucleoprotein U-like protein 2	Hnrnpul2	84.939	1516500000	56726000	33280000	75627000	52951000	65377000	149370000	74092000	72569000	73873000	60004000	19653000	56041000	44398000	60467000	51984000	48633000	75519000	87614000	58027000	87755000	84370000	62079000	69656000	70715000	36637000	44653000	50179000	53060000
Q9CWX9	Q9CWX9	Probable ATP-dependent RNA helicase DDX47	Ddx47	50.638	1514600000	44492000	47251000	22610000	83057000	114800000	104720000	99284000	62148000	69033000	55758000	19729000	64855000	32316000	26760000	44139000	66946000	48426000	98854000	88736000	72056000	89869000	59618000	75349000	65709000	33197000	52837000	44446000	45357000
Q9CXK8	Q9CXK8	60S ribosome subunit biogenesis protein NIP7 homolog	Nip7	20.451	1510500000	66641000	69121000	31473000	53153000	115950000	70801000	55192000	58374000	70466000	46689000	56711000	58862000	49424000	40971000	53956000	61472000	43904000	62532000	70063000	52833000	59287000	59006000	61869000	59398000	66536000	50404000	46897000	38593000
P01942	P01942	Hemoglobin subunit alpha	Hba	15.085	1495400000	4430700	21062000	5349300	5649500	31338000	16589000	14029000	423700000	22249000	18242000	12975000	41706000	30832000	32268000	13466000	81602000	21316000	23389000	70599000	36539000	43379000	78671000	69412000	62608000	54810000	117290000	89142000	100510000
Q8BTM8	Q8BTM8	Filamin-A	Flna	281.22	1485900000	19280000	40936000	14975000	22676000	81429000	42648000	116540000	62741000	60101000	50820000	67825000	53381000	73049000	48627000	37927000	63986000	35353000	41496000	55898000	29371000	116050000	61287000	59334000	67151000	89483000	58398000	63780000	63318000
Q4VA53	Q4VA53	Sister chromatid cohesion protein PDS5 homolog B	Pds5b	164.42	1479100000	31756000	24655000	42713000	26223000	85405000	134090000	47888000	46741000	86611000	58038000	26536000	133490000	72336000	125780000	47888000	51658000	64925000	45371000	57216000	72647000	56742000	63061000	67932000	66181000	35931000	111850000	75844000	101300000
Q9CYR0	Q9CYR0	Single-stranded DNA-binding protein, mitochondrial	Ssbp1	17.319	1471800000	63424000	59367000	62610000	89325000	107830000	104970000	61784000	64990000	54287000	46581000	69548000	32425000	40215000	42262000	49083000	51711000	78218000	94953000	48116000	55542000	65901000	38910000	45883000	50379000	88309000	28452000	40841000	49694000
Q9DCH4	Q9DCH4	Eukaryotic translation initiation factor 3 subunit F	Eif3f	37.984	1470400000	43551000	34669000	34598000	27308000	105120000	93195000	55869000	57014000	50524000	44101000	24301000	41058000	69329000	50643000	45303000	48724000	53847000	51146000	78678000	57306000	63295000	53905000	66008000	62407000	41748000	44473000	61506000	54159000
O35130	O35130	Ribosomal RNA small subunit methyltransferase NEP1	Emg1	26.974	1470300000	53659000	43209000	33280000	70475000	74523000	87694000	119100000	67464000	59389000	50560000	9215800	40259000	24411000	33527000	58541000	82288000	52496000	94660000	73871000	60542000	84151000	50796000	54954000	62456000	30867000	44066000	29691000	40217000
Q60875	Q60875	Rho guanine nucleotide exchange factor 2	Arhgef2	111.97	1469800000	55399000	33701000	61651000	62760000	109090000	160700000	62697000	43211000	41509000	61780000	13774000	25195000	57328000	51502000	84074000	50278000	68826000	96510000	67852000	116330000	74686000	64550000	56011000	56230000	12591000	39357000	30962000	34862000
Q9QYB1;Q8BXK9;Q8BHB9	Q9QYB1	Chloride intracellular channel protein 4	Clic4	28.729	1463800000	20627000	18080000	35901000	55451000	121790000	58269000	49280000	59196000	54731000	47147000	35786000	39442000	49596000	57891000	19683000	28081000	60632000	63526000	80635000	40869000	60884000	60114000	57941000	70319000	52247000	40205000	42596000	57497000
Q91WQ3	Q91WQ3	Tyrosine--tRNA ligase, cytoplasmic;Tyrosine--tRNA ligase, cytoplasmic, N-terminally processed	Yars	59.105	1454500000	38062000	28403000	43624000	23541000	102040000	51794000	57341000	65460000	76830000	50735000	78061000	105470000	105850000	47034000	30043000	34182000	65182000	17364000	57528000	66384000	50796000	65163000	53470000	73099000	107290000	83979000	94976000	75339000
Q8VCY6	Q8VCY6	U3 small nucleolar RNA-associated protein 6 homolog	Utp6	70.429	1445900000	49934000	33401000	19804000	76608000	101340000	90326000	86063000	53531000	52904000	57037000	8583900	70033000	49379000	61494000	46167000	54629000	39134000	91944000	72071000	53365000	81226000	57877000	62159000	58360000	28479000	49301000	41979000	48816000
P83887;Q8VCK3	P83887;Q8VCK3	Tubulin gamma-1 chain;Tubulin gamma-2 chain	Tubg1;Tubg2	51.1	1445700000	76911000	38019000	25532000	35512000	73581000	76319000	36851000	73705000	46868000	48608000	127660000	114210000	101580000	67199000	67119000	57734000	39687000	50626000	55434000	55358000	40133000	66469000	57944000	59297000	142530000	89464000	91988000	67128000
Q8R2N2	Q8R2N2	Cirhin	Cirh1a	76.908	1444700000	42997000	39624000	34566000	86207000	133720000	92799000	96977000	38798000	84313000	75785000	7174400	41235000	26668000	30956000	51230000	54210000	39265000	95365000	79744000	52838000	93296000	45271000	64580000	67687000	17345000	36700000	35607000	41267000
Q9Z0H4	Q9Z0H4	CUGBP Elav-like family member 2	Celf2	54.27	1442800000	21991000	38775000	67837000	55386000	77719000	196790000	80697000	85409000	64443000	56133000	4537700	45796000	42692000	52621000	32397000	50404000	102610000	77273000	52384000	77768000	90428000	55798000	52679000	54398000	10810000	32384000	40540000	56850000
O54941	O54941	SWI/SNF-related matrix-associated actin-dependent regulator of chromatin subfamily E member 1	Smarce1	46.638	1442400000	65124000	55463000	68734000	30500000	41367000	76866000	51884000	37336000	71143000	66078000	55124000	107850000	91156000	90655000	68883000	57252000	83107000	42715000	37768000	55041000	52571000	45859000	66761000	63922000	77980000	91223000	72247000	83448000
Q9CXW3	Q9CXW3	Calcyclin-binding protein	Cacybp	26.51	1442000000	34942000	22562000	49791000	54000000	56813000	64299000	72093000	75254000	69033000	54342000	58915000	61764000	64335000	72189000	40889000	53414000	58365000	64720000	74436000	54340000	74906000	56288000	64630000	64506000	69283000	49558000	63261000	61859000
Q501J6	Q501J6	Probable ATP-dependent RNA helicase DDX17	Ddx17	72.399	1437500000	60857000	48007000	59628000	33876000	94250000	122290000	46875000	57500000	62257000	58853000	44261000	84899000	87688000	61673000	65818000	57994000	72491000	41327000	62406000	80726000	49124000	55998000	64384000	66730000	66896000	66623000	71383000	60992000
O35887	O35887	Calumenin	Calu	37.063	1437400000	66843000	45653000	44879000	42494000	110890000	58235000	67325000	61423000	74038000	63404000	46075000	51475000	61960000	49679000	55582000	54542000	58361000	54934000	67572000	40698000	57232000	67261000	60697000	61249000	81207000	48916000	65703000	51472000
P83940	P83940	Transcription elongation factor B polypeptide 1	Tceb1	12.473	1428700000	40441000	43957000	41422000	56736000	83661000	95563000	51321000	52108000	68697000	48717000	65192000	57362000	42188000	67014000	45014000	50063000	57140000	62370000	59013000	53733000	73120000	44340000	58228000	63470000	67371000	52209000	49037000	66479000
Q9ERS5	Q9ERS5	Pleckstrin homology domain-containing family A member 2	Plekha2	47.379	1427200000	47887000	55124000	64365000	59312000	139330000	215610000	43007000	51477000	79065000	50454000	0	17888000	21172000	26907000	52004000	62907000	84826000	72124000	60781000	109650000	61180000	50884000	69776000	65533000	0	28990000	28306000	27543000
Q8K1B8	Q8K1B8	Fermitin family homolog 3	Fermt3	75.634	1426700000	31582000	27820000	24872000	57541000	128110000	95660000	58868000	55185000	56907000	55459000	5765800	33529000	63864000	32088000	38791000	41153000	51063000	63236000	79710000	68314000	58546000	56774000	55074000	58366000	19780000	35872000	53222000	39471000
P46061	P46061	Ran GTPase-activating protein 1	Rangap1	63.53	1425500000	66445000	50945000	37326000	42754000	77853000	91475000	66300000	67389000	58587000	49368000	17863000	47293000	63075000	26742000	54994000	54927000	71707000	67744000	69839000	54337000	57712000	60387000	54411000	62099000	39323000	46416000	63569000	41003000
Q9JMA1	Q9JMA1	Ubiquitin carboxyl-terminal hydrolase 14	Usp14	56.001	1424800000	27070000	38655000	17491000	42112000	153580000	52765000	57885000	77969000	63945000	63456000	30553000	43209000	51302000	39347000	35551000	46795000	48687000	57645000	79976000	48194000	64932000	51698000	52057000	66156000	40454000	36472000	47921000	47295000
P54227	P54227	Stathmin	Stmn1	17.274	1421900000	56072000	30945000	35240000	19413000	41529000	71162000	53659000	59720000	78091000	22373000	158140000	125040000	117320000	128630000	46855000	62757000	72716000	22123000	35471000	56541000	54118000	58586000	67424000	64904000	171300000	123440000	100940000	115410000
Q60664	Q60664	Lymphoid-restricted membrane protein;Processed lymphoid-restricted membrane protein	Lrmp	59.587	1419400000	39385000	46190000	68723000	49279000	116710000	141690000	61106000	54087000	69870000	46514000	20179000	25991000	80387000	40218000	57632000	58422000	94810000	64808000	63478000	83840000	58191000	49719000	60018000	58025000	45980000	33061000	68658000	39692000
Q9D819	Q9D819	Inorganic pyrophosphatase	Ppa1	32.667	1418600000	43170000	37754000	40159000	30557000	111300000	107530000	55939000	58362000	60770000	38395000	21624000	46183000	41681000	53112000	49471000	51117000	64423000	51574000	66158000	71675000	63775000	59647000	57821000	55556000	47087000	40538000	38915000	52997000
O70194	O70194	Eukaryotic translation initiation factor 3 subunit D	Eif3d	63.988	1417000000	23952000	16821000	26218000	54089000	117640000	90843000	81005000	78195000	37483000	57492000	15415000	37459000	32006000	41154000	42333000	36797000	43864000	83171000	68607000	63330000	68508000	70720000	55496000	56191000	33630000	40241000	37047000	42477000
Q9JL26;A2APV2	Q9JL26	Formin-like protein 1	Fmnl1	122.06	1415000000	68593000	52189000	58851000	61988000	111370000	130690000	60829000	33792000	63997000	47335000	12837000	44302000	42162000	36749000	62443000	60902000	81663000	77145000	64180000	83761000	71802000	60053000	60211000	58847000	39550000	40332000	49216000	48678000
A0A2I3BPG9;P83882	A0A2I3BPG9;P83882	60S ribosomal protein L36a	Rpl36a	12.455	1412500000	51512000	9502100	62819000	65893000	121210000	170920000	103070000	58326000	55823000	53380000	29222000	34378000	40342000	76383000	45787000	33746000	70533000	65203000	92247000	114780000	98242000	39351000	50984000	79115000	31607000	43882000	30838000	56247000
Q5RJG1	Q5RJG1	Nucleolar protein 10	Nol10	80.076	1405300000	39640000	35555000	14061000	74656000	158890000	76539000	107910000	54917000	45267000	39496000	3242200	34787000	22514000	29934000	46858000	49633000	34132000	93896000	92990000	47010000	99931000	60177000	54013000	64231000	11543000	57340000	32628000	37638000
Q9CQ48	Q9CQ48	NudC domain-containing protein 2	Nudcd2	17.66	1404900000	71965000	63629000	74188000	59217000	99647000	96744000	70687000	46190000	62938000	56523000	21112000	23646000	31369000	31048000	64976000	72537000	92367000	74401000	69464000	68650000	85303000	75099000	62520000	63875000	26665000	27442000	27613000	29519000
Q78ZA7	Q78ZA7	Nucleosome assembly protein 1-like 4	Nap1l4	42.679	1404700000	54779000	46358000	63888000	39158000	31837000	49960000	73896000	54885000	19395000	53365000	82137000	55835000	47981000	52023000	49310000	50106000	60458000	53473000	56625000	53402000	79837000	59793000	54850000	57700000	75958000	56441000	47566000	58485000
Q9JKX6	Q9JKX6	ADP-sugar pyrophosphatase	Nudt5	23.984	1398400000	56394000	37540000	69737000	48819000	86279000	116940000	77028000	56114000	55891000	64825000	23666000	34113000	50214000	49534000	51516000	58913000	87583000	65300000	64200000	81474000	75142000	45087000	61470000	67330000	38876000	36928000	41367000	46041000
Q05816	Q05816	Fatty acid-binding protein, epidermal	Fabp5	15.137	1389500000	29293000	90627000	44656000	17420000	53348000	75501000	65500000	46979000	61803000	55422000	44346000	82074000	77309000	80992000	38136000	42074000	54115000	27647000	45939000	51239000	60128000	43273000	63769000	61611000	77622000	80063000	75155000	96276000
Q91WM3	Q91WM3	U3 small nucleolar RNA-interacting protein 2	Rrp9	52.106	1388400000	48596000	69906000	45608000	40484000	106050000	95263000	73647000	45365000	68082000	57745000	15228000	33293000	21231000	25323000	54781000	86229000	48785000	63208000	68577000	51583000	71298000	58235000	61728000	62696000	33867000	41012000	33931000	35878000
P58044	P58044	Isopentenyl-diphosphate Delta-isomerase 1	Idi1	26.289	1384000000	29560000	19352000	47173000	71916000	89440000	102390000	71124000	70363000	61062000	62864000	23564000	55805000	48252000	49156000	48720000	46917000	63115000	80565000	63240000	67586000	67754000	60099000	54109000	56557000	45635000	40941000	44164000	47810000
O35344	O35344	Importin subunit alpha-4	Kpna3	57.772	1382000000	66347000	23467000	41301000	21408000	44919000	62715000	47679000	60943000	59918000	66488000	71415000	117040000	111650000	115310000	74009000	41716000	58387000	40007000	45274000	46151000	48399000	56903000	62587000	61937000	77465000	93108000	101520000	89752000
P12382	P12382	ATP-dependent 6-phosphofructokinase, liver type	Pfkl	85.359	1379400000	25865000	20689000	27554000	72372000	87839000	130540000	67726000	56915000	52384000	46700000	9730800	80530000	88040000	63355000	36087000	28883000	39634000	109480000	48931000	75921000	62537000	57188000	56402000	49804000	9846200	57666000	62654000	59742000
Q9DBP5	Q9DBP5	UMP-CMP kinase	Cmpk1	22.165	1378700000	43432000	33647000	46467000	58715000	78942000	96094000	53379000	73509000	58909000	46272000	15116000	31580000	22775000	59195000	52706000	56719000	47549000	89588000	61466000	54108000	50722000	65865000	56848000	50838000	52778000	34396000	30244000	50498000
Q02650;P32114;Q00288	Q02650	Paired box protein Pax-5	Pax5	42.231	1377200000	87881000	46365000	54960000	9378200	47664000	87897000	43711000	72276000	60117000	60268000	85275000	104970000	103810000	79530000	82318000	62368000	68052000	25603000	37795000	65183000	51254000	60129000	62051000	62757000	109440000	89337000	82973000	78605000
Q9Z2U1	Q9Z2U1	Proteasome subunit alpha type-5	Psma5	26.411	1376800000	54506000	48850000	54090000	29726000	67539000	67216000	68630000	65709000	70644000	45507000	52504000	94588000	74789000	89309000	59885000	60871000	65397000	41987000	49793000	54453000	76734000	65500000	65172000	55961000	66669000	74431000	62164000	84288000
Q91VR2	Q91VR2	ATP synthase subunit gamma, mitochondrial	Atp5c1	32.886	1376200000	32149000	31785000	31521000	37900000	93847000	103030000	54226000	49679000	76043000	45503000	23681000	64843000	86258000	59145000	38606000	39520000	49797000	48765000	77666000	66235000	53175000	53528000	72322000	48039000	29570000	55379000	77197000	62984000
P70670	P70670	Nascent polypeptide-associated complex subunit alpha, muscle-specific form	Naca	220.5	1373700000	27886000	42730000	61824000	32550000	74296000	85872000	92891000	60049000	42646000	56778000	49270000	62336000	61537000	65735000	37965000	54159000	73776000	46803000	54002000	62137000	93254000	58151000	61453000	62229000	67811000	56201000	57809000	65337000
Q8QZY1	Q8QZY1	Eukaryotic translation initiation factor 3 subunit L	Eif3l	66.612	1370400000	14894000	23260000	31917000	27914000	122730000	86206000	51899000	44080000	46723000	35094000	13095000	49464000	93414000	48209000	22211000	33045000	39918000	57293000	70464000	66957000	57292000	51373000	56459000	51278000	33709000	41328000	75071000	48399000
Q8R016	Q8R016	Bleomycin hydrolase	Blmh	52.511	1367000000	97403000	66026000	15530000	12186000	97798000	38496000	44244000	73753000	68796000	59237000	18709000	47852000	31036000	69649000	76542000	92037000	38134000	19609000	77261000	23154000	47739000	45452000	59694000	58970000	22743000	29372000	25424000	38864000
Q9JIF7	Q9JIF7	Coatomer subunit beta	Copb1	107.06	1366200000	39854000	28273000	38539000	32624000	77537000	61912000	34613000	77778000	66658000	58796000	22385000	48416000	74716000	42698000	34599000	49906000	50177000	58038000	56880000	53431000	46533000	60264000	64794000	52243000	49643000	51149000	73320000	49010000
P40124	P40124	Adenylyl cyclase-associated protein 1	Cap1	51.564	1365400000	61658000	25386000	29241000	18668000	31295000	53032000	79382000	83860000	47668000	39401000	84738000	130800000	113500000	99638000	53854000	46504000	43654000	30320000	43918000	50657000	74291000	67404000	63639000	52240000	87091000	76867000	89759000	89514000
P26638	P26638	Serine--tRNA ligase, cytoplasmic	Sars	58.388	1362900000	14414000	14030000	21383000	23207000	95024000	89147000	41949000	66307000	52279000	45919000	33969000	53674000	54052000	72270000	24520000	31824000	44801000	43521000	67836000	50658000	44658000	47230000	54919000	57450000	52755000	46770000	49523000	65470000
Q99KI0	Q99KI0	Aconitate hydratase, mitochondrial	Aco2	85.462	1360500000	48694000	23860000	54172000	9782400	66810000	86229000	81585000	39703000	48544000	64920000	55652000	104120000	63678000	94455000	48768000	40674000	59634000	13973000	50224000	62164000	67313000	61317000	58824000	60020000	71714000	96354000	73895000	98648000
Q6R0H7	Q6R0H7	Guanine nucleotide-binding protein G(s) subunit alpha isoforms XLas	Gnas	121.5	1360400000	10350000	11125000	22741000	9691800	39945000	45274000	4918300	275640000	29525000	19266000	2605500	10704000	22584000	10629000	43202000	36615000	78768000	58068000	69521000	77549000	23463000	54100000	71760000	60129000	19373000	32142000	51198000	43207000
Q8CIL4	Q8CIL4	Uncharacterized protein C1orf131 homolog		31.344	1356900000	50015000	80206000	21786000	74269000	107300000	63981000	95017000	71956000	69015000	60651000	36738000	31944000	23530000	21963000	54141000	84826000	55053000	78349000	68721000	44349000	76186000	56877000	58383000	57689000	52770000	46431000	34576000	34087000
Q8R5K4	Q8R5K4	Nucleolar protein 6	Nol6	129.23	1354300000	14847000	37182000	17841000	104700000	118920000	92410000	144450000	39100000	57871000	32667000	2694600	50276000	26606000	26721000	31739000	54722000	34558000	105750000	73941000	66274000	121580000	54048000	51524000	53254000	8361800	46268000	36601000	40787000
Q922S8	Q922S8	Kinesin-like protein KIF2C	Kif2c	81.084	1337600000	62655000	56191000	34353000	45866000	70984000	121730000	78794000	80439000	44360000	37506000	12713000	56823000	32413000	47546000	74121000	50594000	53894000	75644000	63536000	64997000	59940000	66327000	53162000	58784000	33960000	49606000	42010000	54482000
P09528	P09528	Ferritin heavy chain;Ferritin heavy chain, N-terminally processed	Fth1	21.066	1336500000	33556000	46996000	43493000	8165400	44039000	50443000	71846000	59986000	74334000	71319000	32927000	130930000	127540000	136880000	36496000	47047000	41435000	18900000	41954000	35767000	87071000	61602000	55091000	76101000	89405000	92405000	103610000	129680000
Q80TV8	Q80TV8	CLIP-associating protein 1	Clasp1	169.23	1332300000	62891000	30246000	33935000	36836000	52028000	143250000	28974000	64036000	43884000	73539000	71915000	144830000	87805000	132760000	62410000	51028000	50908000	59490000	54281000	72268000	40626000	57936000	53077000	60979000	79374000	106230000	80555000	118080000
P26040	P26040	Ezrin	Ezr	69.406	1324700000	53154000	49556000	55585000	18983000	37546000	69852000	99241000	58123000	52639000	61974000	61697000	74674000	64129000	88434000	56655000	55605000	74175000	27723000	44566000	54838000	81466000	62862000	57548000	66318000	76393000	63107000	71220000	73418000
Q9R1P4	Q9R1P4	Proteasome subunit alpha type-1	Psma1	29.546	1321100000	36367000	48357000	21427000	31148000	54553000	74405000	56169000	59183000	85022000	33373000	30432000	58469000	41440000	73439000	55082000	58088000	48911000	59915000	44481000	42384000	65457000	59597000	54015000	50685000	57370000	57452000	51648000	70039000
P25911;P08103	P25911	Tyrosine-protein kinase Lyn	Lyn	58.812	1320800000	57546000	31874000	25403000	47614000	108210000	95926000	58555000	50275000	36430000	27748000	39131000	105350000	94024000	75441000	56934000	41705000	36232000	42650000	43506000	47697000	48496000	54427000	50529000	54363000	61298000	70997000	67576000	67253000
Q8BGH2	Q8BGH2	Sorting and assembly machinery component 50 homolog	Samm50	51.863	1318200000	58878000	39523000	33975000	21430000	82987000	103190000	45811000	80180000	75777000	58797000	4219200	87929000	129000000	68675000	64850000	50418000	40861000	33740000	58232000	70843000	51132000	63134000	62908000	51098000	13000000	74781000	99552000	68141000
P62309	P62309	Small nuclear ribonucleoprotein G	Snrpg	8.496	1304900000	63811000	70541000	33139000	47700000	89903000	100340000	45299000	66683000	72054000	74387000	44888000	54578000	56605000	50678000	52314000	90049000	30767000	52771000	66546000	57749000	68047000	46536000	78447000	62916000	60009000	43620000	34584000	51205000
P43277	P43277	Histone H1.3	Hist1h1d	22.099	1295700000	38474000	39906000	65795000	63192000	63907000	72845000	36467000	51395000	48858000	43585000	34782000	85122000	76881000	64242000	27179000	50872000	66164000	53626000	47372000	37966000	37904000	35346000	43478000	49221000	35830000	64036000	58586000	65839000
P68510	P68510	14-3-3 protein eta	Ywhah	28.211	1287800000	30466000	37123000	47652000	17948000	65700000	88751000	55906000	38289000	52061000	48616000	74955000	79839000	76212000	83819000	46260000	44932000	45152000	43244000	44956000	52912000	61225000	54197000	50329000	51704000	107400000	90271000	81304000	85710000
P48025;Q8BZ25	P48025	Tyrosine-protein kinase SYK	Syk	71.376	1287400000	73295000	24589000	41460000	51626000	77892000	149240000	47351000	69615000	63313000	36304000	16656000	38925000	52595000	31791000	47624000	36669000	58186000	64979000	52067000	73788000	51815000	52337000	55118000	52917000	31980000	42043000	48959000	50428000
Q99N69	Q99N69	Leupaxin	Lpxn	43.478	1285700000	77950000	55482000	76227000	34692000	86702000	133810000	36045000	56504000	49381000	45084000	32608000	22017000	40776000	40363000	61703000	66281000	82022000	51102000	63468000	81513000	43716000	49106000	53403000	56687000	46353000	32565000	38770000	40570000
Q6PR54	Q6PR54	Telomere-associated protein RIF1	Rif1	266.23	1285500000	157970000	59083000	46897000	45078000	36915000	67821000	42276000	63022000	62463000	51860000	50458000	47818000	59411000	68999000	108360000	106580000	73903000	55978000	23390000	42299000	48636000	47185000	55532000	61790000	80105000	63613000	56698000	63860000
Q9CZ30	Q9CZ30	Obg-like ATPase 1	Ola1	44.729	1284900000	10778000	5058700	19650000	17789000	192590000	131150000	42902000	50032000	38197000	39067000	9243800	21004000	86274000	43529000	22802000	14951000	34994000	50031000	94775000	41399000	64555000	55017000	44377000	59921000	22835000	33688000	44702000	54974000
Q6ZWY9;P10854;Q64478	Q6ZWY9;P10854;Q64478	Histone H2B type 1-C/E/G;Histone H2B type 1-M;Histone H2B type 1-H	Hist1h2bc;Hist1h2bm;Hist1h2bh	13.906	1277300000	80310000	36011000	20796000	188370000	47747000	50842000	12975000	35739000	26804000	26218000	66619000	67989000	35814000	34166000	57878000	42121000	27717000	196910000	35768000	36492000	13682000	41939000	29278000	29792000	91467000	61330000	33820000	35643000
Q8BML9	Q8BML9		Qars	87.676	1276200000	35023000	22840000	26860000	55674000	88031000	120170000	65569000	51295000	60435000	55284000	4053700	47569000	56585000	27331000	41081000	39893000	37911000	76105000	56399000	63691000	60923000	58012000	57606000	56031000	7207300	39517000	50520000	32655000
P29391;P49945	P29391;P49945	Ferritin light chain 1;Ferritin light chain 2	Ftl1;Ftl2	20.802	1268000000	33421000	63848000	33932000	13404000	56391000	78758000	71955000	34936000	39924000	58987000	53063000	90957000	86664000	89194000	39655000	51960000	59685000	21606000	40000000	35711000	87903000	45925000	55266000	57827000	68281000	62310000	70881000	81968000
Q9ERH4	Q9ERH4	Nucleolar and spindle-associated protein 1	Nusap1	48.572	1266200000	91376000	45046000	92956000	35705000	90424000	102980000	41026000	36977000	53379000	67877000	45462000	40117000	44946000	28374000	79835000	77036000	96725000	51555000	57653000	76635000	40489000	67001000	49658000	59674000	62919000	34495000	39585000	33721000
Q08024	Q08024	Core-binding factor subunit beta	Cbfb	22.03	1260000000	71241000	44318000	27736000	22417000	88447000	149830000	58983000	69407000	37710000	32805000	48260000	45032000	60509000	44873000	63702000	60845000	63923000	45913000	50012000	49205000	55499000	45352000	49323000	51847000	56050000	49714000	53756000	56315000
Q9Z2U0;Q9CWH6	Q9Z2U0	Proteasome subunit alpha type-7	Psma7	27.855	1247700000	82924000	37143000	53504000	28081000	30939000	32695000	42580000	85063000	60959000	41058000	74949000	44199000	40390000	55842000	41406000	57392000	56573000	46015000	56819000	50056000	69403000	57910000	50859000	52955000	60707000	58807000	51673000	82502000
Q8BMS1	Q8BMS1	Trifunctional enzyme subunit alpha, mitochondrial;Long-chain enoyl-CoA hydratase;Long chain 3-hydroxyacyl-CoA dehydrogenase	Hadha	82.669	1247600000	61166000	16890000	47361000	32418000	58790000	219500000	69435000	49897000	39785000	51001000	9022800	78236000	93856000	63998000	45723000	26003000	67146000	64007000	38026000	76350000	48328000	46278000	52123000	55649000	30023000	62727000	68253000	58346000
Q9ESX5	Q9ESX5	H/ACA ribonucleoprotein complex subunit 4	Dkc1	57.401	1246200000	59083000	56418000	37381000	32191000	106350000	85993000	47757000	47660000	55654000	57400000	31686000	47653000	41226000	29310000	51480000	63203000	45130000	67175000	70654000	62362000	61316000	57301000	39499000	68288000	43494000	48606000	38999000	34581000
P61161	P61161	Actin-related protein 2	Actr2	44.76	1245100000	43756000	34895000	42345000	25402000	66928000	70672000	49040000	60174000	46768000	50152000	75459000	48374000	53606000	58500000	45661000	47217000	49470000	34403000	46351000	44468000	55650000	48416000	53137000	53566000	83861000	52997000	52344000	60715000
Q66JX5;P0CAX8	Q66JX5	FGFR1 oncogene partner	Fgfr1op	42.758	1243200000	87315000	55730000	19094000	15915000	29056000	23827000	4716000	65910000	55055000	46715000	195370000	113100000	74270000	89328000	72238000	68695000	34504000	35522000	25792000	27433000	18088000	60251000	61451000	50386000	234400000	90790000	69514000	81337000
Q9DCW4	Q9DCW4	Electron transfer flavoprotein subunit beta	Etfb	27.623	1240500000	58078000	44670000	60612000	35346000	54948000	100550000	64482000	43689000	38321000	58068000	33081000	61491000	63315000	68942000	62401000	51728000	68890000	57844000	41079000	71856000	59576000	54122000	46239000	53661000	48585000	52541000	57797000	68154000
E9Q3P4	E9Q3P4		Cenpf	342.47	1235200000	78080000	50080000	65435000	36767000	80179000	65902000	31675000	55470000	55065000	29152000	30289000	66710000	62613000	78365000	60914000	66232000	65714000	60830000	49287000	46297000	47306000	53807000	57464000	47940000	57051000	56720000	55035000	64410000
Q66JQ7	Q66JQ7	Protein CASC5	Casc5	179.33	1231100000	48535000	36742000	24577000	49456000	50696000	35827000	71648000	43083000	59901000	32877000	24143000	61553000	56509000	47290000	48747000	50081000	38363000	66061000	43217000	32193000	64749000	48973000	48990000	52946000	49863000	64534000	49522000	56836000
P61222	P61222	ATP-binding cassette sub-family E member 1	Abce1	67.314	1230500000	17968000	23340000	16285000	20119000	95787000	93724000	52273000	55874000	66891000	54160000	5449800	35385000	29493000	19833000	27231000	32173000	37094000	39531000	65495000	62127000	64497000	50375000	54911000	56592000	20260000	38040000	42260000	33642000
P27048;P63163	P27048;P63163	Small nuclear ribonucleoprotein-associated protein B;Small nuclear ribonucleoprotein-associated protein N	Snrpb;Snrpn	23.656	1228000000	46596000	43169000	39967000	21542000	75032000	95442000	69836000	66139000	57737000	52574000	21158000	45574000	45328000	44879000	46063000	41710000	47364000	43461000	50859000	54603000	68028000	38228000	49632000	47748000	53213000	46012000	61664000	62100000
Q99LL5	Q99LL5	Periodic tryptophan protein 1 homolog	Pwp1	55.586	1227500000	90897000	52102000	44653000	54983000	67540000	96620000	51380000	55133000	66893000	55349000	48371000	46162000	55364000	22050000	77459000	66906000	55930000	74830000	57518000	55219000	45079000	47388000	58784000	54796000	66221000	41660000	41884000	29684000
P28352	P28352	DNA-(apurinic or apyrimidinic site) lyase;DNA-(apurinic or apyrimidinic site) lyase, mitochondrial	Apex1	35.49	1226400000	67713000	20728000	38849000	50988000	66518000	72403000	55168000	39292000	29560000	44469000	73942000	40138000	40076000	54601000	36924000	39304000	56243000	50654000	54624000	54937000	70825000	53954000	42933000	54244000	68986000	52010000	48547000	64877000
Q9Z1F9	Q9Z1F9	SUMO-activating enzyme subunit 2	Uba2	70.568	1215700000	18244000	15702000	25012000	32956000	74905000	63877000	50887000	50534000	50249000	41723000	37605000	46171000	84179000	44006000	18780000	28463000	39456000	42150000	62119000	37422000	49972000	48155000	50342000	53354000	37008000	43904000	73524000	53400000
Q01147	Q01147	Cyclic AMP-responsive element-binding protein 1	Creb1	35.122	1215500000	54872000	29740000	51195000	19125000	37889000	63431000	46159000	49003000	53576000	56192000	62259000	115540000	99337000	75361000	66719000	31318000	62932000	32632000	23150000	43275000	45733000	47545000	46529000	58746000	107300000	90224000	78933000	90645000
Q9D1P4	Q9D1P4	Cysteine and histidine-rich domain-containing protein 1	Chordc1	37.35	1200700000	31810000	26025000	38001000	27187000	117280000	77196000	56180000	39359000	59599000	43640000	9835400	32873000	48766000	23984000	40964000	48020000	44571000	46822000	65801000	56552000	40774000	41380000	57970000	50434000	32501000	36627000	36898000	36877000
E9Q3S4	E9Q3S4	Mitogen-activated protein kinase kinase kinase 19	Map3k19	146.41	1195100000	46260000	14679000	72368000	31601000	257600000	108920000	0	67679000	38505000	0	41732000	9396900	81640000	85886000	45973000	98406000	88298000	35676000	82459000	73455000	0	39544000	48047000	0	45641000	45726000	53174000	56349000
Q8CEE0	Q8CEE0	Centrosomal protein of 57 kDa	Cep57	56.909	1194800000	73796000	35817000	43658000	14449000	59189000	54625000	14698000	45030000	40293000	32247000	173940000	76854000	74636000	81885000	70965000	68315000	57722000	27505000	36577000	39503000	19119000	44835000	51447000	47562000	180000000	62238000	55769000	68321000
P97376	P97376	Protein FRG1	Frg1	29.127	1191300000	57574000	39259000	55415000	26782000	69293000	94825000	47334000	58272000	54707000	37930000	14795000	64542000	62138000	43730000	53915000	42975000	67302000	49879000	51370000	57425000	46017000	53042000	47683000	46657000	37715000	51731000	54583000	46906000
Q91VI7	Q91VI7	Ribonuclease inhibitor	Rnh1	49.816	1188300000	36051000	27530000	39049000	55795000	94351000	78280000	58754000	50517000	42761000	42793000	3208100	16564000	16682000	18496000	32910000	44459000	64920000	66509000	59965000	67718000	54739000	45205000	53750000	46731000	7294900	20828000	21235000	25293000
Q61598;P50396	Q61598	Rab GDP dissociation inhibitor beta	Gdi2	50.537	1182800000	22893000	44962000	48572000	0	54345000	54353000	71194000	56842000	40080000	61281000	48096000	110740000	77473000	104070000	37905000	48570000	55644000	0	36640000	44561000	62378000	55360000	48793000	57650000	81539000	85549000	73120000	93157000
Q99J77	Q99J77		Nans	40.024	1178600000	16941000	14871000	33993000	38520000	93241000	73805000	35660000	44622000	35975000	44552000	8478200	49548000	37459000	38310000	29506000	32471000	42822000	42676000	56540000	44184000	41581000	47177000	57004000	39437000	27387000	40568000	32427000	39221000
Q99JX4	Q99JX4	Eukaryotic translation initiation factor 3 subunit M	Eif3m	42.516	1168200000	23599000	10087000	22667000	26513000	94479000	97582000	48814000	45863000	28840000	53658000	18023000	49109000	55059000	63311000	22637000	29874000	34001000	40286000	50581000	35939000	48690000	48699000	43772000	46186000	46252000	47691000	52866000	50909000
P00405	P00405	Cytochrome c oxidase subunit 2	Mtco2	25.976	1165200000	45355000	21686000	34165000	31129000	56225000	98462000	62482000	52560000	47910000	41574000	26501000	56854000	117810000	80999000	39718000	31211000	37608000	56945000	35213000	48317000	71368000	36602000	41030000	42863000	43392000	41824000	61130000	56467000
Q9DB20	Q9DB20	ATP synthase subunit O, mitochondrial	Atp5o	23.363	1160500000	42023000	16612000	60887000	27726000	71126000	131210000	62617000	28881000	46694000	41788000	28692000	45291000	88651000	60484000	42072000	35261000	67123000	41599000	46593000	75555000	56044000	47708000	43473000	60913000	52743000	34702000	73365000	51169000
Q9D880	Q9D880	Mitochondrial import inner membrane translocase subunit TIM50	Timm50	39.776	1152800000	25347000	46420000	46748000	18832000	71887000	85243000	56644000	51195000	50917000	41457000	11891000	49102000	57068000	38925000	51361000	59757000	43436000	70391000	57942000	48795000	43582000	50363000	51992000	40258000	30965000	38452000	41978000	33304000
Q8K389	Q8K389	CDK5 regulatory subunit-associated protein 2	Cdk5rap2	205.94	1152400000	49780000	54257000	28232000	14027000	34286000	36294000	13123000	56741000	62109000	30501000	177160000	97549000	99153000	90177000	49977000	73725000	51515000	29706000	34069000	34649000	27182000	49599000	53965000	49760000	174830000	76748000	73507000	71093000
Q91YT7	Q91YT7	YTH domain-containing family protein 2	Ythdf2	62.279	1147500000	56029000	43465000	48571000	27729000	90445000	90691000	18340000	26847000	54786000	52865000	33979000	40419000	59556000	44763000	57970000	53802000	50238000	38525000	49285000	51807000	45275000	39978000	44133000	55136000	65615000	51549000	43512000	43899000
Q6A065;Q80U49	Q6A065	Centrosomal protein of 170 kDa	Cep170	175.05	1144400000	41214000	15118000	42880000	15350000	60211000	37378000	24929000	37516000	28823000	57100000	164610000	92319000	118380000	109530000	68867000	44901000	39479000	25704000	38315000	33046000	25846000	51426000	51343000	46586000	163130000	87614000	68591000	87797000
Q91VH6	Q91VH6	Protein MEMO1	Memo1	33.692	1136800000	882500000	1177900	18991000	0	15918000	29294000	7228500	9592200	11348000	7305600	0	7800200	5675400	4066200	283050000	38805000	50380000	0	28607000	55142000	55739000	53452000	33500000	40738000	0	50738000	29072000	61911000
Q9WVR4	Q9WVR4	Fragile X mental retardation syndrome-related protein 2	Fxr2	73.742	1132700000	80734000	48773000	36268000	40711000	84112000	75536000	50131000	66415000	49726000	32657000	16072000	19270000	37904000	24909000	60922000	70111000	62248000	48971000	58132000	58282000	54049000	57517000	55810000	38466000	36847000	23648000	41234000	27660000
Q64261	Q64261	Cyclin-dependent kinase 6	Cdk6	37.028	1130000000	26271000	34578000	9843600	60395000	91989000	26014000	95510000	35826000	53561000	42161000	2041000	20819000	17304000	22744000	34561000	41196000	23840000	77013000	61540000	26304000	90282000	42853000	50487000	49775000	4579300	24981000	28487000	24263000
Q3UPP8	Q3UPP8	Centrosomal protein of 63 kDa	Cep63	80.448	1129400000	58128000	50266000	28292000	19376000	58466000	50726000	22115000	37238000	55470000	27756000	94882000	69198000	66445000	70587000	57475000	51548000	40748000	45396000	42324000	32404000	23768000	43509000	56710000	49531000	130990000	59230000	50641000	58588000
P28658	P28658	Ataxin-10	Atxn10	53.706	1127300000	43055000	32126000	41540000	41012000	91997000	86942000	73161000	44567000	35243000	48844000	9058500	18158000	40554000	8090700	32936000	45296000	59569000	47706000	53181000	53317000	62090000	39839000	45585000	48621000	21862000	26073000	38307000	28693000
Q9D2V7	Q9D2V7	Coronin-7	Coro7	100.81	1127100000	31213000	39267000	74786000	35334000	88910000	220640000	16203000	49389000	46756000	61520000	17468000	25953000	13122000	25090000	39834000	40460000	72914000	37225000	58484000	112280000	27003000	42523000	50660000	45062000	24530000	30019000	29170000	34621000
O35465	O35465	Peptidyl-prolyl cis-trans isomerase FKBP8	Fkbp8	43.528	1124200000	69392000	20552000	37361000	40446000	59891000	119110000	50170000	45487000	61558000	65473000	12857000	43618000	55345000	25489000	53521000	36372000	49981000	52095000	48895000	68622000	54206000	46300000	45531000	48284000	30276000	35745000	49079000	38716000
P62307	P62307	Small nuclear ribonucleoprotein F	Snrpf	9.7251	1124200000	37460000	31687000	57606000	24598000	83307000	46717000	54581000	55508000	59755000	48000000	41392000	68401000	63518000	53638000	23819000	47781000	64814000	27639000	47528000	19401000	52923000	42829000	52861000	45925000	46312000	47991000	53088000	47908000
Q9CYL5	Q9CYL5	Golgi-associated plant pathogenesis-related protein 1	Glipr2	17.09	1120600000	63391000	46085000	46594000	7680800	43800000	86953000	9940900	23852000	56061000	50965000	81081000	75915000	129490000	99001000	73350000	57328000	63895000	19104000	32246000	54949000	20914000	46566000	50950000	47709000	125980000	61826000	102110000	85003000
Q99MK8;Q3UYH7	Q99MK8	Beta-adrenergic receptor kinase 1	Adrbk1	79.638	1120100000	45392000	25519000	52700000	41876000	87599000	161850000	36575000	53428000	45720000	37633000	10539000	23989000	28548000	30200000	43316000	45396000	66282000	53640000	47422000	78493000	47601000	47975000	38733000	54447000	24375000	29479000	30755000	32078000
A2AGT5	A2AGT5	Cytoskeleton-associated protein 5	Ckap5	225.63	1112600000	57697000	7440400	36779000	8777000	79421000	76649000	25398000	48493000	30825000	33373000	8464500	80303000	79653000	50032000	67064000	16555000	46716000	19221000	59091000	62992000	42375000	53526000	43068000	38232000	15757000	72246000	58759000	39433000
Q8BJW5	Q8BJW5	Nucleolar protein 11	Nol11	80.817	1111800000	32882000	32225000	18607000	52428000	96286000	66982000	69168000	59327000	54048000	34323000	3688600	47699000	24312000	32964000	41501000	41181000	29482000	66427000	62478000	48092000	72290000	59788000	50354000	55132000	8210000	38040000	22660000	35777000
Q8CCS6	Q8CCS6	Polyadenylate-binding protein 2	Pabpn1	32.296	1109600000	65899000	33582000	44227000	22398000	47804000	66929000	40687000	59746000	57924000	28488000	67550000	52511000	50848000	55060000	46231000	47389000	52495000	35729000	55462000	46005000	46359000	47065000	50419000	54691000	63480000	45643000	53687000	50666000
Q8K2F0	Q8K2F0	Bromodomain-containing protein 3	Brd3	79.761	1109300000	13446000	41239000	38841000	13442000	40778000	29790000	13833000	46408000	53568000	43382000	67606000	154620000	92453000	107990000	28566000	48457000	49719000	23516000	31256000	27002000	22203000	60538000	50372000	39821000	80431000	108090000	75099000	87118000
Q99JT2	Q99JT2	Serine/threonine-protein kinase 26	Stk26	46.613	1105400000	44528000	57199000	31737000	63105000	63820000	67955000	51892000	67410000	24814000	28200000	17205000	19303000	22422000	15416000	46403000	45713000	47314000	67818000	59188000	57624000	60715000	53399000	42765000	46537000	25317000	29772000	29390000	35379000
Q9CY27	Q9CY27	Very-long-chain enoyl-CoA reductase	Tecr	36.09	1104600000	37796000	25166000	30035000	31702000	73868000	83688000	70609000	54132000	56407000	54209000	16477000	51485000	71750000	45754000	22799000	34911000	36293000	37656000	40094000	55765000	59948000	54274000	44486000	73363000	25024000	59121000	65720000	50896000
P14685	P14685	26S proteasome non-ATPase regulatory subunit 3	Psmd3	60.718	1103600000	23294000	14440000	21164000	38266000	120900000	89077000	62763000	32476000	42861000	55184000	2663500	25265000	31430000	24561000	29098000	28982000	36342000	68526000	75719000	56446000	52811000	45518000	44172000	44634000	12753000	27080000	29070000	25342000
Q9CQF3	Q9CQF3	Cleavage and polyadenylation specificity factor subunit 5	Nudt21	26.24	1102800000	64836000	66613000	44008000	21926000	57399000	84558000	27591000	43051000	47353000	43911000	63916000	50336000	71918000	58935000	63219000	83233000	53786000	32791000	42492000	50780000	43329000	50377000	47338000	46692000	80489000	60690000	69139000	57348000
Q9Z1B5	Q9Z1B5	Mitotic spindle assembly checkpoint protein MAD2A	Mad2l1	23.598	1102300000	51414000	40034000	42954000	29100000	97015000	95008000	56059000	42651000	57972000	28383000	15516000	41552000	46912000	27263000	55069000	50612000	46681000	55700000	53070000	59106000	54489000	43987000	50542000	41420000	38923000	41822000	45025000	36358000
Q3V1V3	Q3V1V3	ESF1 homolog	Esf1	98.047	1100500000	50581000	41637000	24508000	43540000	83098000	44551000	61446000	48275000	49320000	44017000	15583000	50796000	36902000	13813000	47464000	50695000	41906000	51411000	54101000	33996000	55988000	43491000	52992000	49785000	25995000	42807000	33867000	29989000
O09167	O09167	60S ribosomal protein L21	Rpl21	18.562	1099100000	16625000	11005000	78879000	33184000	149420000	190790000	26478000	16685000	18686000	28876000	5993600	68790000	73850000	10145000	45803000	33790000	26003000	72755000	56108000	62714000	45595000	34834000	44815000	53545000	20709000	29783000	28907000	34400000
Q64152	Q64152	Transcription factor BTF3	Btf3	22.031	1093800000	45182000	32446000	17460000	23666000	48651000	74998000	69529000	34877000	42529000	36718000	32069000	61012000	72248000	61423000	29389000	45912000	42461000	32863000	35436000	32906000	53972000	26911000	37794000	35400000	35101000	39643000	40750000	39576000
Q99104;P21271;E9Q1F5	Q99104	Unconventional myosin-Va	Myo5a	215.54	1088600000	30193000	29122000	31851000	16675000	26040000	80820000	11180000	42511000	33752000	53920000	77734000	161760000	131610000	170060000	14465000	32927000	45017000	7111300	6230800	33691000	5087300	38948000	24601000	35035000	133140000	282320000	101290000	104140000
P70296	P70296	Phosphatidylethanolamine-binding protein 1;Hippocampal cholinergic neurostimulating peptide	Pebp1	20.83	1086400000	51514000	36931000	30786000	36075000	59185000	59238000	43031000	36928000	42832000	37866000	50042000	66949000	45289000	50389000	41730000	47168000	34707000	44144000	46920000	48735000	47620000	41806000	52345000	47481000	63539000	55226000	43701000	55867000
Q9DCA5	Q9DCA5	Ribosome biogenesis protein BRX1 homolog	Brix1	41.241	1084700000	49185000	31477000	14411000	49652000	71616000	74733000	76435000	52392000	45846000	36191000	0	41721000	29704000	24503000	51316000	41419000	22429000	68333000	56354000	56619000	81591000	52961000	42134000	33800000	0	41526000	27945000	35770000
Q62418	Q62418	Drebrin-like protein	Dbnl	48.699	1081000000	12321000	37537000	78929000	6686300	64066000	113420000	56353000	20243000	52001000	44934000	15099000	41893000	34995000	93461000	26407000	48847000	71191000	36026000	41513000	55283000	45088000	39538000	46257000	51627000	49787000	41266000	42309000	61773000
Q3U0V1	Q3U0V1	Far upstream element-binding protein 2	Khsrp	76.775	1079500000	23617000	26648000	57609000	23190000	77516000	56788000	62334000	42080000	46482000	41594000	38044000	81287000	61192000	75047000	27105000	41216000	60292000	32991000	50174000	53614000	53551000	39893000	56163000	41193000	55511000	60838000	54611000	63738000
Q3UPF5	Q3UPF5	Zinc finger CCCH-type antiviral protein 1	Zc3hav1	106.69	1079100000	56028000	26089000	37491000	46190000	94614000	100430000	45274000	46536000	47429000	34831000	12581000	22666000	44462000	19280000	52617000	35893000	46821000	55556000	61586000	60035000	40890000	44690000	48525000	48217000	26632000	34681000	37030000	35113000
Q9JJ80	Q9JJ80	Ribosome production factor 2 homolog	Rpf2	35.363	1073200000	36129000	36088000	15693000	55666000	93112000	47525000	79554000	36628000	47035000	46940000	16798000	50954000	20437000	41983000	36070000	42318000	32086000	68705000	60776000	45646000	71735000	41324000	43495000	48164000	24000000	41970000	31691000	36789000
Q9D0F1	Q9D0F1	Kinetochore protein NDC80 homolog	Ndc80	73.961	1071400000	30406000	40291000	29139000	49550000	63146000	51645000	52950000	62938000	50510000	36602000	23155000	29694000	39613000	24441000	39920000	53864000	48000000	53880000	53350000	42242000	45857000	54563000	47429000	49264000	60464000	33149000	40581000	36846000
Q9QUM9	Q9QUM9	Proteasome subunit alpha type-6	Psma6	27.372	1071200000	50169000	37450000	33996000	18093000	54189000	43425000	67449000	44791000	50924000	37603000	37391000	67296000	48968000	75582000	55879000	49648000	40304000	40492000	39646000	33467000	57076000	41686000	42908000	40143000	51181000	56167000	39350000	67600000
Q6ZWV7	Q6ZWV7	60S ribosomal protein L35	Rpl35	14.552	1069400000	49085000	34537000	50471000	41780000	63820000	104110000	45259000	55128000	45193000	46271000	16554000	36669000	39073000	17819000	47786000	46672000	56465000	83886000	51188000	71309000	45098000	45115000	49191000	45612000	34237000	26929000	25775000	27175000
Q9WVA3	Q9WVA3	Mitotic checkpoint protein BUB3	Bub3	36.954	1069000000	32624000	25830000	43048000	34789000	68172000	59705000	62437000	54162000	46997000	18484000	16523000	52816000	55425000	45542000	38208000	41578000	51576000	53395000	47059000	44934000	58281000	47965000	44757000	44648000	31906000	38597000	38743000	43559000
P46638;P62492	P46638;P62492	Ras-related protein Rab-11B;Ras-related protein Rab-11A	Rab11b;Rab11a	24.489	1067300000	30668000	33079000	39288000	15371000	69557000	66156000	46937000	39371000	49225000	42565000	19752000	40528000	53417000	48796000	29393000	39282000	48932000	30317000	47925000	45172000	45348000	41083000	47201000	45409000	46972000	42381000	48173000	55618000
Q9D0B6	Q9D0B6	Protein PBDC1	Pbdc1	22.223	1064800000	45972000	32107000	45738000	35061000	76281000	117070000	62856000	44326000	41280000	49534000	9101900	11752000	25130000	14191000	44907000	43600000	56057000	58341000	52526000	57360000	54126000	42172000	43503000	48482000	24248000	20851000	19954000	22215000
Q91VA7	Q91VA7	Isocitrate dehydrogenase [NAD] subunit, mitochondrial	Idh3b	42.194	1061700000	35866000	11090000	21006000	29130000	70393000	93413000	47302000	58002000	47360000	41724000	25657000	51608000	64245000	42165000	44185000	30391000	41547000	47720000	43537000	46729000	43389000	45265000	46027000	41593000	34972000	38460000	67214000	46162000
Q9CXY6	Q9CXY6	Interleukin enhancer-binding factor 2	Ilf2	43.062	1061700000	83099000	65423000	43820000	31346000	58311000	103880000	31864000	41552000	47996000	35888000	33250000	26093000	43223000	31070000	60164000	58421000	58858000	45637000	53629000	64169000	45427000	38537000	48018000	45314000	43456000	47896000	46103000	34211000
P15532	P15532	Nucleoside diphosphate kinase A	Nme1	17.208	1059000000	45924000	51317000	27154000	0	31054000	71903000	72485000	48571000	42701000	37894000	71283000	97975000	58065000	110060000	53178000	80032000	39506000	0	28186000	38036000	67833000	54155000	56099000	34577000	104840000	69413000	50872000	80366000
Q8VDJ3	Q8VDJ3	Vigilin	Hdlbp	141.74	1057800000	10467000	5882000	13236000	51424000	112190000	60187000	32154000	48341000	49239000	38748000	2860200	37965000	40882000	20343000	12251000	7354800	17057000	68706000	56834000	37857000	57154000	51245000	54480000	38037000	7075700	42224000	45558000	25535000
Q8BMJ3;J3QNT6	Q8BMJ3;J3QNT6	Eukaryotic translation initiation factor 1A, X-chromosomal	Eif1ax;Gm5039	16.46	1055900000	19206000	25436000	52236000	18327000	85923000	55501000	46321000	60095000	59698000	27257000	6065100	46437000	16728000	39684000	26947000	42138000	55643000	31652000	52600000	51818000	37971000	44944000	46624000	39856000	35368000	38339000	33333000	35487000
Q64433;Q9JI95	Q64433;Q9JI95	10 kDa heat shock protein, mitochondrial	Hspe1;Cpn10-rs1	10.963	1054400000	18113000	39185000	33082000	12053000	48970000	60186000	105480000	41106000	48641000	49248000	27019000	68567000	50105000	73559000	21653000	46614000	58051000	24406000	31480000	39646000	99736000	34742000	43670000	49049000	45104000	53490000	57105000	71865000
P08003	P08003	Protein disulfide-isomerase A4	Pdia4	71.982	1053300000	7993800	16839000	39977000	3779800	34936000	41966000	77984000	50532000	49739000	56396000	64664000	88208000	88364000	109200000	10917000	34685000	52886000	8422500	33639000	35061000	73455000	36094000	48520000	56306000	91607000	69708000	80039000	99134000
P97760	P97760	DNA-directed RNA polymerase II subunit RPB3	Polr2c	31.443	1051500000	51452000	46399000	36149000	28015000	75735000	94105000	47017000	58136000	39827000	38668000	26591000	25959000	56288000	14814000	42067000	51568000	48890000	47817000	51302000	52927000	37894000	49636000	45093000	48900000	49188000	38978000	40530000	31499000
Q9JM76	Q9JM76	Actin-related protein 2/3 complex subunit 3	Arpc3	20.524	1051200000	48918000	31934000	66165000	7739400	26501000	105960000	33682000	20933000	63354000	49216000	24356000	17842000	14416000	18146000	38745000	32565000	34629000	53168000	50181000	40882000	35416000	47197000	34940000	31349000	80421000	35160000	34936000	42827000
Q80TN4	Q80TN4	DnaJ homolog subfamily C member 16	Dnajc16	89.135	1049600000	64655000	76115000	28556000	17306000	59561000	64017000	31950000	40966000	42156000	27109000	0	21896000	63881000	18084000	60275000	73840000	45868000	36224000	49808000	28750000	43198000	47313000	49311000	41476000	0	33742000	38100000	32271000
P46467	P46467	Vacuolar protein sorting-associated protein 4B	Vps4b	49.419	1046100000	49827000	33478000	35435000	48239000	60881000	85024000	44337000	43579000	34572000	36244000	20932000	35873000	40392000	31768000	55353000	46785000	45026000	61455000	42543000	52206000	46001000	55685000	39432000	48736000	39065000	30563000	39675000	31394000
Q7TT37	Q7TT37	Elongator complex protein 1	Ikbkap	149.58	1045800000	132100000	4703300	18159000	60831000	72021000	96255000	67515000	38884000	19391000	21245000	0	1576800	7890900	6793500	33824000	8774700	40984000	72438000	69287000	67865000	72168000	72721000	39703000	39838000	0	4555700	18310000	13142000
Q9DB96	Q9DB96	Neuroguidin	Ngdn	35.658	1038600000	36338000	49439000	14409000	40428000	106300000	68078000	59282000	21698000	50053000	38103000	10221000	19968000	33830000	24822000	42161000	57143000	35834000	80006000	72717000	40063000	73123000	38269000	44321000	40598000	18819000	26472000	27033000	17788000
Q922R8	Q922R8	Protein disulfide-isomerase A6	Pdia6	48.1	1037800000	25141000	28931000	24050000	8400300	25699000	27082000	76083000	48996000	49570000	46442000	58960000	82251000	138160000	100930000	23456000	30387000	40063000	14093000	20734000	26421000	67960000	46164000	45323000	47077000	92382000	78423000	125230000	97075000
Q8BU03	Q8BU03	Periodic tryptophan protein 2 homolog	Pwp2	102.91	1037400000	45046000	27463000	17010000	48346000	82301000	54739000	59299000	49920000	42340000	38371000	8832300	40223000	25027000	25428000	45737000	37019000	25781000	72065000	55196000	40096000	58388000	39198000	45927000	45637000	21865000	37371000	28944000	31267000
Q8BIQ5;Q8C7E9	Q8BIQ5	Cleavage stimulation factor subunit 2	Cstf2	61.341	1035500000	40739000	42776000	53598000	35422000	75384000	94030000	51573000	49781000	48569000	47078000	16692000	26874000	18995000	27719000	46140000	42853000	62581000	50451000	50550000	53952000	49398000	45053000	48830000	42376000	29273000	28382000	26413000	36759000
Q8BMA6	Q8BMA6	Signal recognition particle subunit SRP68	Srp68	70.573	1035000000	31776000	32506000	34729000	38767000	67179000	87375000	52718000	45564000	55603000	44526000	7383900	23068000	33735000	28315000	37376000	38985000	48584000	50230000	45186000	57824000	53497000	48639000	45750000	44608000	17854000	27456000	34138000	32279000
P62482;P63143	P62482	Voltage-gated potassium channel subunit beta-2	Kcnab2	41.021	1029800000	19031000	22368000	7883600	229680000	177720000	86898000	19761000	27721000	38581000	30051000	5229600	8544000	0	6360700	28750000	14715000	10710000	330210000	108200000	59182000	16047000	32268000	43259000	38607000	9583200	8751800	0	7322500
Q6A028	Q6A028	Switch-associated protein 70	Swap70	68.995	1029400000	56420000	46070000	53411000	36616000	79058000	77039000	34381000	54300000	42497000	33441000	24548000	87410000	40814000	29414000	51969000	53022000	57898000	48632000	52964000	51697000	41360000	50275000	45697000	42517000	40413000	36565000	43111000	37987000
Q8JZX4	Q8JZX4	Splicing factor 45	Rbm17	45.303	1023300000	48950000	37120000	41308000	23873000	76770000	48513000	42215000	38452000	49441000	42891000	28056000	56365000	68741000	41105000	44404000	49581000	57691000	35348000	44746000	33185000	43527000	42442000	52548000	46545000	41849000	49006000	54814000	37307000
Q9JJT0	Q9JJT0	RNA 3-terminal phosphate cyclase-like protein	Rcl1	40.84	1018200000	34492000	28135000	19836000	32003000	89116000	64441000	61131000	41022000	44404000	32774000	7773000	55935000	34860000	31962000	38634000	39189000	28677000	74242000	60815000	45956000	61327000	45328000	44635000	40825000	17164000	38264000	28255000	33059000
P51150	P51150	Ras-related protein Rab-7a	Rab7a	23.489	1013600000	21800000	27493000	33283000	20361000	75439000	76421000	44788000	43829000	33795000	48078000	35431000	54606000	77726000	93812000	23458000	35506000	60828000	36671000	37079000	47642000	52456000	42075000	35760000	50583000	48226000	40137000	54686000	75882000
P60229	P60229	Eukaryotic translation initiation factor 3 subunit E	Eif3e	52.22	1012000000	11519000	10186000	27535000	21574000	68174000	51687000	54314000	31957000	47308000	47766000	10710000	29601000	79361000	47494000	19162000	23826000	23517000	28707000	37526000	25092000	42856000	32930000	38339000	34286000	25541000	26482000	49282000	31880000
P84096	P84096	Rho-related GTP-binding protein RhoG	Rhog	21.308	1010300000	33142000	35749000	37898000	21447000	56047000	113150000	40284000	46509000	35203000	41455000	16784000	48188000	55717000	48321000	34995000	41179000	52453000	28850000	40850000	68864000	42946000	42954000	42760000	48425000	39644000	44298000	46027000	50549000
Q9ERF3	Q9ERF3	WD repeat-containing protein 61;WD repeat-containing protein 61, N-terminally processed	Wdr61	33.772	1009700000	22693000	11979000	45190000	62781000	90525000	82991000	64143000	55408000	36395000	47742000	15159000	26202000	27817000	7546300	43612000	24221000	47150000	63796000	45325000	42563000	50049000	39632000	45238000	40583000	23722000	34120000	37251000	20106000
P50431	P50431	Serine hydroxymethyltransferase, cytosolic	Shmt1	52.6	1007500000	22103000	12882000	25423000	23972000	72220000	67930000	39344000	29344000	45852000	19780000	16090000	50966000	27621000	47229000	22935000	27625000	33773000	42886000	52783000	37024000	41847000	40801000	35475000	39106000	23444000	37217000	34647000	46694000
F8VQC1	F8VQC1	Signal recognition particle subunit SRP72	Srp72	74.656	1002800000	46672000	26049000	50806000	42887000	69273000	133110000	41263000	41826000	34527000	27393000	5988800	15801000	16016000	21641000	37725000	39443000	50300000	55802000	58443000	56164000	45519000	42675000	41615000	47507000	13192000	27989000	27689000	24553000
Q9DBY8	Q9DBY8	Nuclear valosin-containing protein-like	Nvl	94.475	1002100000	32024000	25302000	48275000	42008000	70059000	79500000	50632000	38847000	44259000	45678000	6225200	12939000	38596000	24284000	49558000	40853000	49733000	53970000	44749000	47190000	47363000	42894000	46221000	42372000	16336000	25245000	31764000	30838000
Q61635	Q61635		Ifi47	46.784	999020000	5178800	0	44136000	9372600	23505000	48741000	62104000	10672000	68824000	74102000	642500	83020000	76348000	88079000	19096000	0	53631000	38355000	51566000	70683000	54672000	31971000	50731000	52740000	9812800	15141000	40699000	22598000
Q8BH04	Q8BH04	Phosphoenolpyruvate carboxykinase [GTP], mitochondrial	Pck2	70.527	995380000	19776000	16786000	25677000	28144000	67475000	100850000	31257000	47027000	56564000	33732000	24550000	65074000	56425000	58959000	27870000	31669000	39072000	50109000	33189000	50608000	36637000	42408000	39301000	35759000	53889000	60634000	51585000	65332000
Q80X50	Q80X50	Ubiquitin-associated protein 2-like	Ubap2l	116.8	995160000	42435000	41153000	45869000	40119000	58781000	66774000	42547000	47177000	33235000	38360000	15926000	42786000	32818000	50166000	42495000	53641000	56793000	42059000	44806000	45540000	47490000	34639000	48980000	36373000	27634000	35702000	37224000	39513000
Q8CIE6	Q8CIE6	Coatomer subunit alpha;Xenin;Proxenin	Copa	138.43	985900000	8565200	9640600	22402000	47681000	78089000	77176000	43917000	36340000	44881000	35442000	1726200	15396000	50756000	30046000	12915000	12693000	21474000	48461000	60315000	69329000	57247000	38879000	41073000	47510000	2088400	29333000	39688000	31288000
P55264	P55264	Adenosine kinase	Adk	40.148	984010000	38615000	21800000	23288000	41817000	64624000	85901000	39026000	48268000	37589000	37849000	14172000	31968000	32274000	28289000	34870000	28144000	40200000	50632000	47012000	53384000	45548000	43187000	38286000	45426000	25835000	32700000	31760000	31435000
Q9DBG6	Q9DBG6	Dolichyl-diphosphooligosaccharide--protein glycosyltransferase subunit 2	Rpn2	69.062	982700000	20310000	6945000	4020300	7080900	78050000	40110000	54816000	18304000	40032000	16024000	8048200	60694000	63464000	30486000	29192000	17057000	0	28050000	33924000	34280000	53506000	40867000	39025000	42401000	32841000	45555000	71658000	36534000
Q6A0A9	Q6A0A9	Constitutive coactivator of PPAR-gamma-like protein 1	FAM120A	121.64	974220000	40881000	34587000	26780000	32702000	78503000	70857000	29612000	49524000	27326000	33633000	35168000	60183000	54962000	44409000	35498000	40856000	43134000	35102000	45474000	46038000	33939000	42991000	43506000	38236000	50406000	48128000	44265000	41182000
P59708	P59708	Splicing factor 3B subunit 6	Sf3b6	14.585	973880000	55733000	44137000	37251000	20123000	67269000	79929000	29927000	31839000	35857000	35848000	33795000	21412000	49570000	47902000	48043000	53491000	46333000	35580000	45160000	48970000	37397000	34031000	41834000	36560000	52530000	49980000	45519000	41489000
P08228	P08228	Superoxide dismutase [Cu-Zn]	Sod1	15.942	972680000	19782000	32552000	39895000	6735200	23048000	37364000	111640000	30215000	39868000	49657000	49788000	67137000	57331000	130520000	23175000	46217000	51594000	13932000	19194000	30506000	86669000	34641000	45578000	39373000	76912000	70122000	64436000	101140000
Q8VHR5	Q8VHR5	Transcriptional repressor p66-beta	Gatad2b	65.41	972100000	43002000	16248000	24651000	13429000	23638000	39026000	22964000	42705000	47053000	39624000	55776000	115020000	106970000	119100000	43068000	26881000	42254000	23176000	21501000	27124000	30702000	37160000	41405000	45246000	83723000	83739000	86357000	91310000
Q9Z2I8	Q9Z2I8	Succinyl-CoA ligase [GDP-forming] subunit beta, mitochondrial	Suclg2	46.839	966920000	41265000	31866000	42727000	11497000	51445000	76543000	53565000	46486000	48763000	34461000	8339800	19265000	39892000	39725000	33562000	42082000	54106000	37219000	34679000	48056000	49553000	40778000	41475000	44967000	26555000	30114000	44322000	36716000
Q8C854	Q8C854	Myelin expression factor 2	Myef2	63.294	963240000	39754000	24897000	42174000	48993000	76638000	75883000	54509000	31781000	33894000	38793000	15453000	19185000	38275000	26968000	40459000	45646000	56387000	51863000	49841000	60212000	46916000	38184000	41219000	41421000	27115000	21909000	27876000	24919000
P52431	P52431	DNA polymerase delta catalytic subunit	Pold1	123.79	961980000	20163000	17990000	22847000	26350000	85085000	113280000	45322000	49838000	25935000	36023000	1444300	28270000	22453000	11454000	33872000	28866000	46834000	46430000	62169000	59248000	38732000	36325000	46166000	33613000	8723900	14612000	26274000	12427000
P54823	P54823	Probable ATP-dependent RNA helicase DDX6	Ddx6	54.191	957570000	13799000	17390000	21043000	15825000	86886000	64510000	26715000	33736000	48226000	42458000	7004800	42576000	59895000	33018000	27245000	22703000	26617000	38069000	52433000	43737000	35123000	44682000	43071000	42863000	33356000	31018000	46720000	28494000
P57784	P57784	U2 small nuclear ribonucleoprotein A	Snrpa1	28.357	956300000	50675000	31818000	39237000	24545000	68954000	62820000	46475000	38332000	23531000	41914000	29715000	59944000	67879000	52616000	44356000	46495000	44626000	32193000	46786000	39735000	44503000	37639000	36256000	47760000	43367000	49239000	59093000	48305000
Q9R1T4	Q9R1T4	Septin-6	2006-09-01	49.619	954920000	37456000	30070000	26118000	26650000	64036000	77518000	22850000	37248000	38325000	26702000	36462000	31494000	27123000	41137000	39686000	39401000	42769000	38188000	40739000	49509000	34881000	34094000	39602000	32330000	42506000	38161000	30379000	34914000
O35685	O35685	Nuclear migration protein nudC	Nudc	38.358	953140000	28642000	23114000	33109000	10193000	53111000	44482000	78179000	24185000	38141000	34378000	42801000	56252000	71589000	54987000	30862000	33555000	42539000	16510000	36590000	31838000	58678000	51128000	35757000	40893000	61493000	46035000	58019000	59747000
P08030	P08030	Adenine phosphoribosyltransferase	Aprt	19.724	952760000	20042000	18586000	40002000	32001000	68523000	74680000	53737000	40453000	37981000	26943000	15575000	35448000	32713000	23236000	21491000	27092000	41982000	37011000	50425000	43532000	51503000	38042000	38973000	35782000	23818000	30392000	36303000	40593000
Q8BG81	Q8BG81	Polymerase delta-interacting protein 3	Poldip3	46.132	952260000	49972000	19635000	50464000	16620000	36045000	94146000	39048000	48123000	24618000	38886000	26178000	60476000	60265000	51991000	47039000	51834000	51476000	25127000	37814000	61878000	37174000	35526000	42682000	36608000	33189000	44340000	43632000	46598000
Q99K43	Q99K43	Protein regulator of cytokinesis 1	Prc1	70.289	951470000	68647000	40104000	48916000	11026000	33439000	66213000	34799000	32229000	40354000	27366000	67606000	45941000	67692000	68516000	56849000	34276000	51677000	19549000	31451000	37979000	42576000	40706000	39521000	36018000	73611000	58717000	55892000	62661000
Q9CR02	Q9CR02	Translation machinery-associated protein 16	Tma16	25.782	948260000	55320000	18129000	30040000	10645000	38552000	57244000	35931000	29978000	37345000	42240000	42674000	83260000	44830000	46681000	51518000	31345000	49871000	21741000	31025000	44141000	41549000	38715000	42649000	38165000	51628000	57301000	46972000	57701000
Q9D0F6	Q9D0F6	Replication factor C subunit 5	Rfc5	38.096	946580000	32128000	26230000	36119000	44510000	76369000	84541000	49368000	19054000	49545000	39830000	3061200	25317000	35398000	32509000	41539000	31909000	39168000	43725000	45664000	49672000	53376000	21751000	41593000	45156000	11262000	25663000	33715000	35309000
Q8C6B9	Q8C6B9	Active regulator of SIRT1	Rps19bp1	15.977	944390000	53509000	55317000	28118000	42350000	57720000	45590000	34818000	30731000	41292000	24364000	29481000	33662000	29129000	26574000	50542000	65210000	35358000	51129000	55823000	28611000	46950000	40956000	41512000	37720000	36762000	28819000	25346000	23527000
Q8BMS9;Q8CB96	Q8BMS9	Ras association domain-containing protein 2	Rassf2	37.973	943920000	34459000	20386000	56304000	63063000	85984000	88795000	46071000	27350000	30012000	44015000	4870500	17961000	18781000	10802000	33785000	47027000	55172000	63735000	45147000	50747000	45785000	34337000	42045000	48866000	12791000	18859000	24108000	22046000
Q6P5F9	Q6P5F9	Exportin-1	Xpo1	123.09	943200000	5635200	6815000	19716000	8562200	64877000	72500000	33808000	35649000	20794000	32166000	1981100	31870000	102780000	33796000	9203700	13743000	25899000	14234000	46737000	52305000	41230000	35194000	33253000	34992000	8741900	30477000	92328000	33366000
Q8CGR7	Q8CGR7	Uridine phosphorylase 2	Upp2	35.755	937850000	46605000	71354000	17867000	0	60127000	19375000	55894000	57029000	116880000	98457000	0	2878800	0	0	17585000	25710000	12485000	0	17758000	6522300	25263000	15907000	34312000	28955000	0	3080600	0	0
Q8JZU2	Q8JZU2	Tricarboxylate transport protein, mitochondrial	Slc25a1	33.931	932390000	24760000	17026000	11934000	71349000	66895000	105370000	34254000	30985000	41356000	31058000	18200000	10140000	28457000	23392000	28864000	32984000	22515000	85648000	49645000	55994000	28062000	38119000	41461000	40769000	23611000	19973000	26706000	18563000
Q3V1H1	Q3V1H1	Cytoskeleton-associated protein 2	Ckap2	74.028	930840000	61754000	34833000	27253000	11733000	62700000	37184000	49089000	55074000	48621000	30102000	32946000	59937000	61779000	44256000	54234000	43027000	44682000	20909000	35295000	31936000	42109000	40262000	45128000	34821000	39517000	54677000	44886000	38636000
Q80VD1	Q80VD1	Protein FAM98B	Fam98b	45.349	930520000	17094000	15371000	53181000	24772000	33686000	71350000	41735000	35848000	37843000	50399000	13601000	29894000	41310000	42024000	19795000	33744000	54586000	32881000	49727000	61559000	41496000	27505000	42892000	54839000	15808000	33450000	37962000	41055000
Q9R0Q4	Q9R0Q4	Mortality factor 4-like protein 2	Morf4l2	32.183	929290000	45117000	42121000	38113000	15796000	37855000	32456000	61429000	32534000	36404000	39301000	32727000	60604000	57736000	51503000	37116000	44926000	46336000	22958000	38188000	31544000	56127000	35026000	39851000	39657000	42933000	53474000	47562000	44490000
Q80YR5	Q80YR5	Scaffold attachment factor B2	Safb2	111.84	926280000	34955000	45596000	57335000	17610000	44490000	74477000	39055000	26573000	33916000	36262000	42806000	54024000	55781000	46697000	50665000	47015000	57799000	27171000	34681000	41200000	36138000	29905000	37211000	37827000	58186000	57100000	56868000	47604000
Q99JI4	Q99JI4	26S proteasome non-ATPase regulatory subunit 6	Psmd6	45.536	923700000	17133000	23098000	15696000	24640000	79961000	75667000	38012000	28238000	35470000	39018000	5554600	32371000	25997000	26294000	25091000	26475000	28567000	39063000	47025000	52026000	48454000	35686000	39791000	42733000	7086200	23773000	28454000	32339000
Q62191	Q62191	E3 ubiquitin-protein ligase TRIM21	Trim21	54.174	922240000	41475000	17370000	4453300	68674000	119140000	112150000	6418400	35503000	21515000	15121000	0	4657800	0	0	53058000	25698000	6564400	82873000	109330000	83951000	11331000	26663000	17693000	21323000	0	6963900	0	0
Q9D1C1	Q9D1C1	Ubiquitin-conjugating enzyme E2 C	Ube2c	19.606	921900000	57902000	38538000	23700000	47580000	80592000	85042000	48433000	33384000	43863000	33026000	0	20989000	19344000	7867000	50596000	43178000	26427000	58064000	49763000	50672000	46198000	37951000	42061000	32454000	0	24686000	27674000	18252000
P20764	P20764	Immunoglobulin lambda-like polypeptide 1	Igll1	22.772	915510000	42748000	62757000	6455700	73158000	68709000	74510000	22501000	49390000	12048000	12850000	215260	2380000	4400800	3416500	38131000	68383000	20825000	65985000	41405000	25138000	52279000	40031000	42297000	43504000	4062700	6679300	11901000	11177000
P51174	P51174	Long-chain specific acyl-CoA dehydrogenase, mitochondrial	Acadl	47.907	909540000	102390000	52867000	1180300	48552000	6057400	6654500	5334000	1714700	55957000	0	499760	95042000	106230000	0	82583000	62488000	36252000	35601000	37332000	40241000	46060000	38338000	35582000	0	19879000	41678000	38122000	0
Q9Z130	Q9Z130	Heterogeneous nuclear ribonucleoprotein D-like	Hnrnpdl	33.558	904910000	38821000	19147000	47150000	16937000	57312000	46835000	36199000	33945000	44868000	41450000	44702000	56776000	67183000	50320000	35564000	48980000	47307000	44352000	34650000	41652000	41781000	42579000	36960000	38523000	48123000	42567000	60807000	42767000
Q9WUD1	Q9WUD1	STIP1 homology and U box-containing protein 1	Stub1	34.909	904360000	10700000	62331000	39339000	0	10680000	33815000	34895000	72665000	11635000	40751000	15108000	60917000	43633000	36089000	60900000	33257000	30359000	0	41155000	26304000	21540000	39846000	45435000	34985000	98952000	43186000	41078000	35735000
O70456	O70456	14-3-3 protein sigma	Sfn	27.706	904180000	5693700	43524000	45763000	45443000	82797000	84758000	73642000	9728800	2478400	53288000	0	51503000	65261000	5009200	48939000	33532000	19971000	68991000	44476000	14336000	56295000	47621000	22046000	31631000	0	39192000	44733000	32802000
P35991;Q03145;P29319;Q8CBF3;P54763;P54754;Q61772;O09127;Q62413	P35991	Tyrosine-protein kinase BTK	Btk	76.437	903870000	32512000	28908000	42941000	48139000	61616000	107770000	58800000	37313000	42664000	25319000	1905600	4016400	7622000	9409200	31059000	27683000	49117000	64827000	51111000	72363000	61221000	34936000	37205000	39329000	24101000	4821200	10197000	13817000
E9Q2Z1	E9Q2Z1		Cecr2	161.53	903590000	64150000	22275000	12305000	19762000	27903000	21063000	26239000	37303000	39349000	35514000	31232000	80790000	52816000	59204000	65175000	38077000	34091000	28104000	23340000	20136000	29209000	38491000	38763000	41766000	47379000	62265000	46463000	55735000
Q922P9	Q922P9	Putative oxidoreductase GLYR1	Glyr1	59.715	899520000	18513000	20499000	55338000	10343000	18582000	78998000	38707000	37936000	28043000	32312000	4403000	85908000	56069000	63687000	30399000	44204000	69636000	19801000	25471000	35040000	32019000	46781000	33571000	36331000	16208000	51770000	45714000	46878000
Q3UEB3	Q3UEB3	Poly(U)-binding-splicing factor PUF60	Puf60	60.248	898610000	50881000	17802000	43283000	20006000	56988000	73218000	31647000	36530000	32185000	54407000	39362000	31319000	50171000	29044000	44383000	36059000	51155000	40018000	38049000	44748000	27120000	36455000	41426000	42576000	45955000	27239000	43417000	36767000
Q7TSG1	Q7TSG1	Centrosomal protein of 120 kDa	Cep120	112.58	897160000	74464000	38394000	23623000	10405000	31528000	33794000	11147000	41146000	46094000	36844000	121900000	80933000	32586000	41766000	60940000	54609000	37065000	18364000	29925000	27972000	17228000	41232000	42503000	35181000	144780000	50091000	39746000	52776000
Q9WUP7	Q9WUP7	Ubiquitin carboxyl-terminal hydrolase isozyme L5	Uchl5	37.616	896160000	25829000	26574000	21282000	25352000	72165000	56270000	50148000	45488000	31422000	31549000	13498000	29570000	33845000	42053000	38604000	30617000	33389000	30641000	40095000	36827000	38197000	39825000	34176000	33431000	31141000	31828000	34674000	41472000
Q8CGC6	Q8CGC6	RNA-binding protein 28	Rbm28	84.213	896050000	22636000	17411000	22084000	45696000	104860000	76736000	52277000	21488000	59044000	27155000	3539000	26011000	30143000	22312000	33832000	27086000	40788000	61037000	45165000	45986000	54548000	35770000	28698000	40720000	11858000	28432000	32227000	31925000
Q99JR8;Q6P9Z1	Q99JR8	SWI/SNF-related matrix-associated actin-dependent regulator of chromatin subfamily D member 2	Smarcd2	59.084	893460000	34830000	14276000	30341000	17260000	45494000	54690000	34361000	47882000	43978000	24558000	25496000	59704000	65992000	59049000	30647000	23794000	41798000	26350000	34086000	38868000	35543000	39963000	40625000	37890000	35758000	55472000	50110000	62026000
Q00899;Q3TTC2	Q00899	Transcriptional repressor protein YY1	Yy1	44.716	893400000	41256000	32416000	39777000	40200000	44327000	60024000	31988000	44323000	40489000	28589000	27536000	27699000	38626000	20442000	40850000	34666000	50218000	51850000	39507000	40344000	39619000	38224000	36240000	30355000	36653000	26075000	33776000	30663000
O54864	O54864	Histone-lysine N-methyltransferase SUV39H1	Suv39h1	47.754	892870000	23072000	20555000	22569000	28237000	24008000	44678000	49486000	48740000	34752000	35626000	12810000	86200000	56229000	61936000	46669000	33966000	29873000	26730000	22341000	31354000	42983000	38581000	35661000	39102000	30087000	59119000	44627000	52644000
O35129	O35129	Prohibitin-2	Phb2	33.296	891350000	18607000	22742000	22343000	9617300	53647000	59627000	37482000	38545000	30701000	34094000	8277900	33817000	90170000	23541000	22102000	32837000	28731000	16352000	35000000	39180000	38187000	40933000	34028000	37271000	13848000	26176000	65353000	33115000
P61965	P61965	WD repeat-containing protein 5	Wdr5	36.588	888800000	39757000	28672000	30586000	40225000	62211000	73885000	46639000	44453000	34011000	23340000	26243000	41286000	36879000	45426000	48377000	44258000	42883000	38415000	41404000	44006000	41915000	41677000	30685000	28420000	35808000	46084000	42171000	41965000
P54103	P54103	DnaJ homolog subfamily C member 2;DnaJ homolog subfamily C member 2, N-terminally processed	Dnajc2	71.721	888630000	37807000	33453000	40652000	30329000	65256000	59593000	36863000	40200000	32205000	24193000	37121000	21892000	29860000	43321000	27673000	34859000	39621000	45966000	51666000	41700000	44462000	35766000	38515000	42247000	32189000	24688000	31460000	29044000
Q64674	Q64674	Spermidine synthase	Srm	33.995	886300000	13304000	3887300	10981000	18659000	59010000	56392000	36321000	30205000	35863000	41896000	10438000	27941000	30065000	39413000	16664000	19177000	25675000	49403000	42961000	29373000	49803000	37576000	36724000	32465000	26883000	33608000	28132000	37656000
P11911	P11911	B-cell antigen receptor complex-associated protein alpha chain	Cd79a	24.583	886230000	31377000	23602000	19856000	15087000	29192000	31083000	26093000	49447000	37814000	22799000	70114000	79069000	102890000	58891000	28054000	32033000	30090000	23237000	24650000	23371000	26831000	43186000	40061000	31115000	80656000	67112000	96457000	62493000
O70435	O70435	Proteasome subunit alpha type-3	Psma3	28.405	884410000	43204000	31149000	30883000	15397000	30877000	49324000	60031000	38517000	42000000	28653000	36124000	33611000	45971000	63489000	39021000	36520000	32897000	30064000	29584000	34412000	59593000	37282000	37667000	42598000	42058000	38644000	40880000	57246000
P06800	P06800	Receptor-type tyrosine-protein phosphatase C	Ptprc	144.84	884390000	53381000	39958000	32650000	11463000	51300000	47927000	32854000	37088000	38065000	38031000	36230000	50623000	44199000	40655000	46467000	50206000	41222000	15294000	36768000	34847000	34336000	37130000	37463000	41942000	48199000	47737000	44441000	47953000
Q8BSP2	Q8BSP2	Condensin-2 complex subunit H2	Ncaph2	68.945	883050000	30396000	32876000	25465000	24972000	57472000	34209000	17521000	25213000	12242000	55165000	27389000	45106000	51068000	39655000	44458000	41637000	31879000	46720000	32904000	29799000	26931000	36199000	38893000	34850000	54059000	36535000	34136000	33775000
Q80UM3	Q80UM3	N-alpha-acetyltransferase 15, NatA auxiliary subunit	Naa15	100.96	878750000	9541600	7759700	15429000	21154000	81398000	56388000	27004000	36956000	30628000	33179000	4922400	20329000	31682000	20753000	14979000	18095000	23515000	26360000	51011000	39857000	29686000	34400000	42140000	31214000	11199000	28762000	30375000	28443000
Q9D7Z3	Q9D7Z3	Nucleolar protein 7	Nol7	28.97	876810000	49923000	49261000	29103000	36264000	61806000	51205000	33744000	38477000	29826000	37371000	21205000	24393000	17187000	17204000	47205000	55983000	29095000	57412000	40368000	35370000	36669000	30299000	28188000	37809000	37049000	21902000	18113000	19779000
Q62186	Q62186	Translocon-associated protein subunit delta	Ssr4	18.936	874020000	24363000	30289000	22700000	19494000	77249000	29821000	46854000	51986000	35432000	32990000	26171000	23644000	41845000	33555000	38070000	33394000	29522000	50086000	37171000	29621000	39470000	34957000	34204000	30712000	38512000	23810000	37176000	31297000
Q8R090	Q8R090	Chromaffin granule amine transporter	Slc18a1	56.033	872020000	0	0	0	0	128070000	0	0	0	0	0	265970000	0	0	146530000	0	0	0	0	126470000	0	0	0	0	0	313030000	0	0	159840000
Q9WTQ5	Q9WTQ5	A-kinase anchor protein 12	Akap12	180.69	866060000	16062000	15834000	21673000	3772200	49578000	13508000	71862000	36609000	30890000	32712000	54508000	40877000	72637000	71488000	29264000	28348000	30499000	8305300	40560000	19223000	50139000	32742000	38223000	38621000	70349000	39534000	54601000	51003000
Q99PM9	Q99PM9	Uridine-cytidine kinase 2	Uck2	29.404	863700000	38589000	42322000	25097000	24616000	55399000	59302000	41241000	44614000	34030000	25592000	16102000	10704000	32895000	19517000	38542000	44313000	42054000	42206000	40545000	50285000	42781000	47987000	36540000	33993000	18923000	23885000	29277000	27713000
Q9CQ60	Q9CQ60	6-phosphogluconolactonase	Pgls	27.254	859360000	9313700	19532000	20874000	18251000	103950000	34680000	41608000	36635000	36287000	42216000	7743800	17159000	19152000	22139000	24502000	29460000	34033000	43891000	51393000	33835000	40500000	34843000	32664000	33665000	28403000	20345000	21401000	30592000
Q923G2	Q923G2	DNA-directed RNA polymerases I, II, and III subunit RPABC3	Polr2h	17.143	850320000	45623000	43915000	28008000	20958000	54852000	75448000	28580000	35988000	31572000	28201000	18108000	39030000	32985000	30734000	40990000	46415000	39984000	37159000	40289000	41730000	40922000	30936000	32092000	36308000	32217000	28201000	31643000	31236000
P97371	P97371	Proteasome activator complex subunit 1	Psme1	28.673	846490000	30021000	25330000	29096000	13649000	35371000	78975000	32401000	41422000	42088000	27437000	48878000	61303000	76049000	60899000	31223000	33248000	42914000	21049000	27873000	36624000	32541000	40071000	40499000	31922000	60712000	47984000	60241000	55348000
O35593	O35593	26S proteasome non-ATPase regulatory subunit 14	Psmd14	34.577	846270000	32418000	17382000	26479000	30472000	52832000	43664000	47446000	38075000	31652000	38997000	7405700	26157000	35656000	27297000	23155000	23398000	27518000	44923000	39879000	28024000	39086000	31350000	44514000	37404000	26102000	24291000	32932000	22315000
O89079	O89079	Coatomer subunit epsilon	Cope	34.567	842120000	19020000	29340000	18587000	10334000	61236000	69760000	27700000	39642000	41034000	30907000	25765000	36811000	68865000	37113000	28837000	32858000	34567000	45944000	37489000	37112000	26631000	38428000	35115000	29312000	38766000	32200000	61084000	30835000
Q60848	Q60848	Lymphocyte-specific helicase	Hells	95.125	841220000	37773000	25448000	38676000	27563000	52891000	106580000	45928000	36689000	29348000	24397000	892140	17846000	16433000	12298000	37051000	31615000	49555000	42463000	43500000	57042000	48097000	33608000	35989000	34242000	8717700	21626000	19150000	28132000
Q8BG48	Q8BG48	Serine/threonine-protein kinase 17B	Stk17b	41.982	840030000	32140000	25117000	51583000	36447000	59294000	80828000	57200000	28704000	31612000	32814000	7521900	13679000	35415000	26220000	31699000	37974000	46193000	56253000	35687000	54111000	43399000	28922000	35897000	39892000	20050000	20280000	33318000	30441000
Q99LX0	Q99LX0	Protein deglycase DJ-1	Park7	20.021	838090000	13837000	28179000	27477000	23675000	56085000	35917000	54904000	40510000	42456000	40598000	27755000	39572000	38520000	48755000	17267000	26718000	25562000	23343000	28083000	22804000	45909000	33832000	34823000	35655000	35414000	27958000	34534000	37930000
Q8CCF0	Q8CCF0	U4/U6 small nuclear ribonucleoprotein Prp31	Prpf31	55.429	837190000	14518000	38806000	32930000	22275000	54018000	83819000	37736000	29718000	38013000	33178000	8416300	30694000	29789000	21387000	30452000	39556000	41902000	31346000	41937000	46069000	33187000	36481000	35635000	35296000	24796000	23424000	26190000	26442000
P62305	P62305	Small nuclear ribonucleoprotein E	Snrpe	10.803	834880000	36205000	12083000	19947000	26452000	28511000	84615000	76666000	33715000	16385000	11519000	30251000	42225000	17963000	39706000	33844000	33062000	39292000	40819000	31751000	40785000	55922000	37529000	25269000	26340000	47701000	36191000	33756000	34171000
P59325	P59325	Eukaryotic translation initiation factor 5	Eif5	48.968	833400000	20676000	17696000	18891000	16189000	55257000	59438000	35021000	32975000	41787000	29517000	7100000	38573000	16288000	35796000	22257000	24620000	37818000	36123000	35721000	28555000	38798000	35960000	37256000	32958000	27185000	23800000	30505000	31142000
Q6ZQK0	Q6ZQK0	Condensin-2 complex subunit D3	Ncapd3	169.43	833310000	22469000	23003000	8888400	53789000	71173000	44818000	31688000	22008000	28513000	38013000	11425000	35356000	40383000	40339000	25521000	29512000	19646000	57090000	41212000	39303000	33104000	25889000	35849000	42198000	27174000	41693000	33038000	36098000
Q923D4	Q923D4	Splicing factor 3B subunit 5	Sf3b5	10.119	832770000	39720000	43135000	22841000	17853000	57734000	37676000	19121000	32315000	33987000	37745000	40649000	48143000	60423000	49596000	32645000	44109000	37994000	21128000	35673000	29131000	32220000	29427000	34481000	33796000	47681000	35758000	43591000	36808000
Q9D1G1	Q9D1G1	Ras-related protein Rab-1B	Rab1b	22.187	826880000	45027000	36726000	36877000	31368000	50290000	65213000	19639000	45096000	39068000	21000000	9646700	20274000	30190000	25612000	41104000	39258000	43239000	33023000	29311000	38327000	32329000	35574000	36456000	35068000	28519000	29712000	40272000	35803000
Q9DBZ5	Q9DBZ5	Eukaryotic translation initiation factor 3 subunit K	Eif3k	25.086	826150000	17720000	9113200	29415000	35482000	38196000	61770000	19661000	18265000	42483000	9516600	7227400	15581000	20346000	33530000	24676000	24087000	24524000	34958000	47281000	43850000	28198000	16017000	39132000	30342000	27963000	31300000	36871000	35084000
Q80U70	Q80U70	Polycomb protein Suz12	Suz12	83.025	824200000	37565000	7464600	22751000	30483000	30585000	63821000	63728000	44367000	28301000	27950000	10453000	35193000	28824000	22492000	38601000	15098000	32728000	41404000	31030000	41011000	55425000	37721000	30999000	40714000	20147000	30322000	25916000	25799000
Q9D1D4	Q9D1D4	Transmembrane emp24 domain-containing protein 10	Tmed10	24.911	817630000	24010000	14300000	29393000	5409800	21239000	44999000	57679000	3805500	37722000	25589000	9434600	53106000	74606000	93991000	21381000	27576000	36583000	14695000	24306000	27805000	49787000	28476000	42499000	39859000	27665000	40372000	72358000	44932000
Q8VDN2;Q6PIC6;Q9WV27;Q64436	Q8VDN2	Sodium/potassium-transporting ATPase subunit alpha-1	Atp1a1	112.98	816650000	7891300	11725000	6648700	2039500	27079000	36552000	36554000	29255000	44774000	29849000	27971000	58457000	148050000	71940000	20115000	26306000	23805000	5394200	21693000	23312000	29614000	37127000	37179000	33436000	44828000	48367000	109710000	49324000
Q8VDD9;A2AHJ4	Q8VDD9	PH-interacting protein	Phip	206.72	815480000	43413000	38279000	24256000	6448200	36780000	49542000	11192000	36212000	24515000	29957000	6065000	70182000	80441000	84598000	41291000	52464000	36772000	16625000	15624000	29859000	20127000	34271000	34985000	36824000	15286000	59632000	64159000	62652000
P16546	P16546	Spectrin alpha chain, non-erythrocytic 1	Sptan1	284.59	815430000	37653000	14872000	31458000	3407300	21304000	37694000	5303400	17925000	25852000	15763000	104250000	133510000	150230000	78618000	34409000	25014000	44130000	12148000	22286000	36239000	10734000	23058000	32309000	26621000	118620000	84994000	123110000	74664000
Q8K4R9	Q8K4R9	Disks large-associated protein 5	Dlgap5	90.195	814070000	30655000	38535000	34176000	13927000	54047000	43263000	39265000	32892000	35427000	29339000	16546000	58933000	28809000	60920000	28348000	40500000	40343000	30630000	38193000	29511000	41657000	38759000	34939000	31736000	20223000	49363000	41640000	55176000
Q7TMY8	Q7TMY8	E3 ubiquitin-protein ligase HUWE1	Huwe1	482.63	811900000	42365000	24997000	4561700	31096000	4733100	99196000	48113000	40188000	38554000	44367000	0	1754800	61392000	30684000	25177000	32869000	49751000	48188000	35123000	39045000	31840000	30598000	36053000	35325000	0	15129000	40650000	20092000
P61514	P61514	60S ribosomal protein L37a	Rpl37a	10.275	811620000	20716000	17374000	24847000	53086000	56625000	57319000	40170000	32116000	29912000	40338000	20491000	20183000	23669000	16456000	28294000	20934000	39790000	79468000	34697000	59019000	30393000	36768000	24286000	33548000	23000000	24911000	24022000	17477000
Q9D0R2;Q8BLY2	Q9D0R2	Threonine--tRNA ligase, cytoplasmic	Tars	83.355	810970000	15955000	7712400	16086000	18590000	74318000	59855000	43570000	34891000	26563000	34360000	10041000	33363000	23304000	20588000	19507000	20995000	25551000	36442000	36890000	35079000	35881000	34709000	30312000	34163000	18546000	28889000	23700000	30706000
A2BE28	A2BE28	Ribosomal biogenesis protein LAS1L	Las1l	89.413	810580000	77570000	20556000	20646000	15168000	30158000	55825000	45517000	22484000	22610000	21774000	47796000	9149200	4298700	14431000	38814000	37823000	40719000	30350000	35048000	53577000	47826000	38941000	31762000	29706000	16668000	14604000	7511000	18636000
Q8R323	Q8R323	Replication factor C subunit 3	Rfc3	40.526	808010000	43945000	28057000	22731000	27934000	40760000	51392000	25432000	36206000	44775000	27428000	24446000	39783000	34285000	24707000	39736000	33448000	36787000	40465000	34878000	28703000	28867000	36233000	39813000	33301000	35474000	35114000	33632000	24931000
Q9D3D9	Q9D3D9	ATP synthase subunit delta, mitochondrial	Atp5d	17.6	807810000	20856000	23297000	33271000	12500000	34426000	41504000	48679000	37079000	33258000	29972000	32096000	44852000	63475000	47135000	20798000	29802000	43287000	16855000	24556000	32230000	50737000	33925000	34006000	33806000	44527000	41985000	60542000	50882000
P62869	P62869	Transcription elongation factor B polypeptide 2	Tceb2	13.17	806320000	30994000	10477000	26602000	21086000	51361000	32546000	29999000	50568000	27096000	30354000	26987000	38051000	34057000	43785000	31530000	28991000	45590000	30761000	33087000	30518000	40594000	38254000	33314000	37069000	39621000	31346000	30383000	40180000
O70551;Q9Z0G2;O54781	O70551	SRSF protein kinase 1	Srpk1	73.088	804750000	33445000	19390000	51338000	33504000	71610000	76403000	29570000	37176000	30876000	33864000	7295500	11782000	17261000	8668100	32981000	32208000	60524000	45297000	42607000	49626000	30144000	34318000	35076000	35985000	14747000	18376000	17606000	14932000
Q9R0P5	Q9R0P5	Destrin	Dstn	18.521	804030000	13732000	20401000	21192000	20403000	59191000	31604000	50115000	45862000	42222000	34488000	19644000	20886000	29678000	25905000	21430000	25787000	24412000	27009000	37418000	26968000	50186000	33173000	34843000	36944000	28907000	21792000	24334000	34057000
P70202	P70202	Latexin	Lxn	25.492	803620000	38062000	51534000	42787000	35620000	65287000	52596000	35466000	24935000	44748000	24350000	12631000	15850000	15666000	12624000	50761000	47552000	36634000	43099000	42260000	46969000	40407000	33560000	33204000	35965000	25807000	21204000	20874000	19104000
Q52KI8	Q52KI8	Serine/arginine repetitive matrix protein 1	Srrm1	106.86	803190000	17080000	29556000	31438000	19629000	58128000	76908000	37427000	30518000	37416000	31094000	20454000	38080000	33019000	27710000	23640000	32812000	40544000	29581000	38060000	49236000	34166000	34291000	34369000	31954000	36091000	36825000	27164000	28620000
Q60715	Q60715	Prolyl 4-hydroxylase subunit alpha-1	P4ha1	60.909	802010000	24635000	13568000	25916000	45327000	28110000	48452000	15158000	23903000	28631000	22191000	15878000	51007000	46411000	66460000	20382000	23499000	33757000	42145000	29220000	25276000	29406000	25361000	44077000	40015000	23421000	32603000	55727000	41816000
Q8BJS4	Q8BJS4	SUN domain-containing protein 2	Sun2	81.604	799020000	66832000	19039000	43600000	13661000	48332000	84470000	46254000	26239000	30940000	27450000	19348000	13212000	32421000	18961000	48299000	38981000	45766000	27555000	29757000	63360000	47574000	36442000	33606000	35272000	26333000	19976000	32609000	27661000
Q99M28	Q99M28	RNA-binding protein with serine-rich domain 1	Rnps1	34.208	796460000	29692000	45985000	23231000	7398000	70169000	97536000	40118000	47863000	42258000	17870000	3885700	18469000	26196000	19050000	33323000	31534000	30982000	16857000	25700000	47001000	28888000	29849000	24721000	20979000	22632000	31388000	25845000	21696000
Q6Y7W8	Q6Y7W8	PERQ amino acid-rich with GYF domain-containing protein 2	Gigyf2	149.19	796020000	81403000	22889000	27360000	12261000	46564000	49559000	11675000	49269000	27372000	25537000	13315000	53609000	62007000	28996000	66830000	35021000	28163000	30447000	32872000	30270000	15175000	43639000	31863000	31980000	24461000	42356000	45442000	40505000
Q921E6	Q921E6	Polycomb protein EED	Eed	50.197	794230000	45512000	23176000	22938000	12055000	45010000	76024000	44205000	29085000	37909000	23152000	10085000	28604000	28663000	22700000	40650000	19747000	30839000	23904000	25227000	40958000	46215000	33909000	34310000	33246000	20692000	41396000	35349000	33842000
G5E870	G5E870	E3 ubiquitin-protein ligase TRIP12	Trip12	224.13	789010000	36612000	23695000	27415000	19750000	54014000	62353000	30526000	23206000	30469000	33859000	19573000	41604000	25184000	35543000	25089000	30049000	52994000	41601000	35116000	45023000	35922000	27041000	33752000	40050000	8708800	34022000	31790000	41506000
Q6PE01	Q6PE01	U5 small nuclear ribonucleoprotein 40 kDa protein	Snrnp40	39.275	788850000	32088000	12480000	12844000	31588000	67109000	58008000	25120000	30508000	41698000	33329000	21077000	37955000	36419000	36759000	39081000	32280000	26713000	38358000	37652000	35066000	35908000	34117000	36386000	29407000	38846000	27023000	29086000	28862000
P70460	P70460	Vasodilator-stimulated phosphoprotein	Vasp	39.666	785370000	41925000	23700000	32242000	43514000	61037000	59196000	36182000	43242000	35336000	30994000	15881000	20525000	23098000	18464000	35390000	35038000	40523000	40591000	41714000	41766000	37185000	31807000	35109000	34990000	31119000	23559000	31897000	28180000
Q9WV55	Q9WV55	Vesicle-associated membrane protein-associated protein A	Vapa	27.855	779140000	23655000	16684000	17660000	10524000	54660000	30809000	51453000	18803000	26281000	43076000	21166000	40822000	73399000	39182000	26777000	25911000	26159000	21609000	29328000	23670000	44340000	29650000	33288000	32135000	35536000	31215000	52413000	31244000
Q9R0P3	Q9R0P3	S-formylglutathione hydrolase	Esd	31.319	777260000	18071000	17333000	21441000	12812000	56061000	59212000	44295000	29506000	33670000	31514000	20395000	36789000	27147000	41406000	24960000	21697000	29298000	25141000	35094000	35830000	41166000	34027000	33280000	33459000	28629000	31035000	26705000	38017000
Q9CPV5	Q9CPV5	Polyamine-modulated factor 1	Pmf1	23.121	776700000	19697000	49042000	19564000	37928000	61620000	25500000	46945000	41224000	34012000	27028000	23610000	16264000	31790000	20974000	25032000	46250000	36972000	35084000	42775000	24689000	43623000	34480000	38723000	28564000	33919000	30550000	31261000	22507000
Q3U7R1	Q3U7R1	Extended synaptotagmin-1	Esyt1	121.55	776670000	14039000	4731000	20329000	8591600	26220000	45158000	23017000	21169000	28717000	41421000	16533000	60910000	192820000	66607000	27782000	17537000	23848000	19984000	20606000	28806000	21257000	22995000	30942000	32117000	31694000	51161000	125310000	54185000
Q64277	Q64277	ADP-ribosyl cyclase/cyclic ADP-ribose hydrolase 2	Bst1	34.616	776190000	44614000	53011000	15348000	7051600	26304000	54452000	10713000	47248000	28389000	27206000	47557000	62090000	58972000	99917000	35367000	54253000	25512000	16707000	17637000	32093000	11930000	34215000	31069000	18422000	81707000	44647000	44630000	69147000
Q8BFY9;Q99LG2	Q8BFY9	Transportin-1	Tnpo1	102.36	775910000	18379000	17378000	19572000	26526000	46703000	59145000	39123000	29273000	34728000	31772000	7769400	27814000	55214000	24915000	19765000	27446000	31453000	37997000	41770000	39853000	32161000	29509000	37888000	35204000	13849000	28421000	40363000	23241000
Q9CVB6	Q9CVB6	Actin-related protein 2/3 complex subunit 2	Arpc2	34.357	772450000	31632000	21680000	21046000	14734000	36651000	32254000	43990000	23003000	26955000	26121000	52283000	37249000	35103000	33127000	28155000	26095000	28724000	26025000	34845000	25309000	37727000	23932000	35548000	32661000	56892000	31282000	34497000	37090000
Q62351	Q62351	Transferrin receptor protein 1	Tfrc	85.73	772080000	13241000	11915000	6084300	10673000	40611000	28888000	61182000	16333000	44463000	34557000	2232800	31863000	90673000	36012000	28262000	24071000	21414000	23447000	23151000	19813000	49697000	23910000	29647000	30593000	2281800	29406000	66672000	33837000
P62774	P62774	Myotrophin	Mtpn	12.861	766910000	12087000	12676000	36254000	15693000	31478000	54637000	40507000	42080000	34152000	22990000	24054000	35490000	31458000	34737000	17013000	21649000	45928000	29808000	32825000	32870000	38963000	34122000	30464000	34815000	31104000	30008000	31130000	32410000
Q91YU8	Q91YU8	Suppressor of SWI4 1 homolog	Ppan	52.755	765840000	24586000	17610000	21586000	43347000	73015000	59584000	40648000	38718000	24498000	33671000	3957500	8614800	26253000	24302000	31318000	39322000	36207000	61936000	43515000	34278000	42875000	31438000	26053000	28758000	10383000	18212000	19290000	22473000
Q8BGS0	Q8BGS0	Protein MAK16 homolog	Mak16	35.185	763840000	43406000	34723000	7900600	17071000	62195000	57823000	57869000	32110000	39721000	31528000	0	19249000	18467000	16690000	34203000	44518000	24009000	26855000	42003000	35376000	54425000	36740000	35266000	31950000	0	27994000	16884000	23753000
P28740	P28740	Kinesin-like protein KIF2A	Kif2a	79.755	760570000	27346000	14328000	47946000	22332000	25562000	71341000	35828000	17176000	41937000	31112000	16549000	54981000	57669000	35258000	33012000	30548000	49127000	27166000	26299000	42289000	41048000	27669000	36543000	36235000	24579000	38248000	46194000	34475000
P61089;Q9CQ37	P61089	Ubiquitin-conjugating enzyme E2 N	Ube2n	17.138	755490000	19266000	22003000	31823000	8725200	37311000	47714000	47401000	26275000	29410000	30055000	30520000	38623000	71771000	50431000	24177000	33870000	37055000	17515000	24693000	32655000	38717000	32581000	33135000	28641000	42542000	34847000	65564000	40853000
Q9WVK4;Q8BH64	Q9WVK4	EH domain-containing protein 1	Ehd1	60.602	749040000	8224100	11193000	22278000	38001000	52043000	35479000	33582000	35555000	36609000	24287000	7452700	14293000	63145000	20107000	13453000	21202000	27933000	38034000	37360000	30508000	34612000	24816000	28766000	30653000	22303000	24460000	48919000	31225000
O55029	O55029	Coatomer subunit beta	Copb2	102.45	748360000	30936000	12006000	19527000	24884000	72010000	54915000	21985000	34032000	20655000	23581000	5573300	5382500	39363000	20175000	21409000	25688000	29243000	29631000	30671000	37640000	28377000	36417000	32474000	24540000	12739000	20111000	33165000	25900000
Q2YDW7	Q2YDW7	N-lysine methyltransferase SETD8	Setd8	38.845	745610000	39591000	21300000	10807000	27786000	37149000	25738000	34852000	25616000	30023000	31834000	19390000	56628000	49476000	43912000	33334000	25385000	21881000	32818000	31627000	20648000	39665000	32046000	31860000	35835000	33763000	41396000	40649000	36441000
Q9D083	Q9D083	Kinetochore protein Spc24	Spc24	23.416	744380000	29936000	50227000	27702000	12215000	65389000	27013000	10901000	23412000	15781000	24605000	4764500	24080000	23570000	13684000	27218000	45559000	30770000	27143000	36892000	25076000	30818000	35535000	35675000	28600000	34066000	16545000	20328000	26195000
P18608	P18608	Non-histone chromosomal protein HMG-14	Hmgn1	10.152	743200000	21315000	38564000	34356000	19201000	36042000	30355000	27804000	23303000	33386000	34149000	24229000	47956000	47690000	37601000	35475000	46781000	42476000	24580000	25368000	20640000	26852000	37716000	32628000	36700000	33199000	41226000	40719000	33872000
P48962;Q3V132	P48962	ADP/ATP translocase 1	Slc25a4	32.904	742820000	19650000	139200000	4857300	23216000	39315000	54867000	15725000	28514000	27064000	156540000	9593600	21899000	39828000	10893000	22336000	107560000	20458000	47006000	29979000	46525000	22051000	28064000	40722000	65431000	17685000	26812000	36401000	31672000
Q80WS3	Q80WS3	rRNA/tRNA 2-O-methyltransferase fibrillarin-like protein 1	Fbll1	33.338	740930000	35105000	28843000	20088000	32450000	54209000	45796000	36183000	34228000	36134000	28104000	17660000	24836000	24088000	17200000	35177000	36844000	26393000	43876000	40265000	33257000	36645000	33353000	37168000	31175000	24597000	23029000	22962000	17807000
A2BH40;E9Q4N7	A2BH40	AT-rich interactive domain-containing protein 1A	Arid1a	242.09	735470000	26319000	17022000	22298000	4198800	29003000	45964000	23544000	27936000	36570000	30761000	16253000	87477000	81078000	87722000	30595000	24243000	29647000	9934300	26823000	24620000	21155000	27280000	28639000	30200000	41978000	72072000	61489000	72867000
Q9QZH3	Q9QZH3	Peptidyl-prolyl cis-trans isomerase E	Ppie	33.448	734960000	24433000	33924000	41781000	26478000	32536000	53308000	21336000	45573000	31703000	15533000	24548000	30922000	22879000	25429000	43698000	44730000	47846000	41801000	26949000	27220000	17356000	37647000	32282000	21646000	36641000	32935000	26454000	21673000
Q569Z5	Q569Z5	Probable ATP-dependent RNA helicase DDX46	Ddx46	117.45	734030000	12489000	22782000	39274000	33139000	56083000	71117000	49399000	20520000	36552000	17485000	3523500	14235000	16136000	15661000	28662000	31213000	44053000	40443000	36824000	46650000	39524000	25672000	29031000	30398000	7488200	16426000	18270000	19897000
Q9CQI7	Q9CQI7	U2 small nuclear ribonucleoprotein B	Snrpb2	25.323	733390000	41271000	23965000	10476000	18257000	38739000	29711000	34362000	51385000	27126000	27472000	27996000	40824000	59147000	29700000	38673000	41612000	21334000	30028000	41196000	27558000	32492000	36703000	33969000	27085000	48271000	34917000	34022000	30390000
Q8QZY9	Q8QZY9	Splicing factor 3B subunit 4	Sf3b4	44.355	733050000	60763000	28091000	60470000	26265000	17509000	13093000	22844000	25469000	35796000	21181000	25813000	44078000	54225000	72885000	32257000	37502000	67372000	19969000	32697000	23905000	25400000	25450000	30887000	27976000	34406000	32585000	49541000	52814000
Q9D4J7	Q9D4J7	PHD finger protein 6	Phf6	41.139	732120000	16353000	16870000	20352000	29527000	50752000	44618000	36250000	24106000	23599000	37064000	8325900	52841000	34994000	43622000	25948000	26886000	23838000	39454000	30097000	29429000	33273000	33681000	28547000	37723000	17395000	40692000	28609000	42829000
P67871	P67871	Casein kinase II subunit beta	Csnk2b	24.942	729520000	39893000	10018000	25362000	8669700	46556000	44939000	31434000	42533000	17733000	31235000	16192000	33438000	37829000	32549000	44903000	18555000	30708000	20476000	30461000	29863000	30351000	37555000	22574000	30305000	38629000	29114000	28954000	26208000
Q9CQN1	Q9CQN1	Heat shock protein 75 kDa, mitochondrial	Trap1	80.208	729000000	14348000	14260000	11860000	22531000	39440000	32598000	47374000	33071000	37332000	24500000	6475400	26020000	66209000	31348000	21477000	23127000	21436000	33143000	29044000	21749000	36917000	33907000	33752000	26265000	11286000	29896000	58551000	28932000
Q9Z2D8	Q9Z2D8	Methyl-CpG-binding domain protein 3	Mbd3	32.168	728080000	40329000	9012100	27607000	17195000	50919000	45003000	19085000	11450000	29727000	27071000	37121000	36790000	50456000	76212000	43100000	19435000	23786000	31120000	31003000	25018000	23433000	22318000	30330000	30219000	53549000	38754000	46380000	43868000
Q6PDG5	Q6PDG5	SWI/SNF complex subunit SMARCC2	Smarcc2	132.6	727290000	33811000	17900000	22889000	10506000	25754000	37744000	13210000	40554000	29580000	33216000	58975000	55922000	66178000	51057000	33115000	22292000	39284000	12605000	18826000	29189000	22883000	32867000	31340000	27984000	53628000	54723000	50848000	59749000
P46460	P46460	Vesicle-fusing ATPase	Nsf	82.613	727230000	15304000	18934000	44802000	14156000	53840000	62997000	49788000	27228000	30058000	29533000	1774300	31156000	34432000	42078000	17318000	25087000	39993000	32846000	36760000	44464000	34365000	33033000	39769000	37381000	9304600	31347000	31773000	28651000
P47758	P47758	Signal recognition particle receptor subunit beta	Srprb	29.579	725860000	26893000	30593000	25402000	23624000	50675000	41441000	53445000	19820000	31105000	31889000	0	24357000	38797000	18404000	28991000	35249000	30208000	38206000	34339000	32602000	55533000	26164000	30355000	37247000	0	21457000	36971000	22563000
Q9WUM5	Q9WUM5	Succinyl-CoA ligase [ADP/GDP-forming] subunit alpha, mitochondrial	Suclg1	36.154	725210000	41595000	18052000	29601000	39567000	37707000	87606000	34101000	30044000	36137000	21566000	3633700	23223000	20872000	26448000	33106000	22961000	34497000	43167000	30271000	51058000	35248000	24377000	33563000	42885000	13259000	20667000	23571000	26087000
Q99LB2	Q99LB2	Dehydrogenase/reductase SDR family member 4	Dhrs4	29.884	723160000	65776000	10967000	14412000	65366000	18875000	49424000	45728000	37956000	25285000	19265000	10774000	20562000	25058000	24175000	60648000	22006000	25101000	69252000	17925000	39980000	38470000	33221000	30503000	27750000	13852000	24019000	26424000	25381000
Q99KN9	Q99KN9	Clathrin interactor 1	Clint1	68.512	719810000	18436000	16799000	27883000	36710000	39354000	57454000	32618000	32389000	35995000	25990000	27107000	38286000	40024000	29199000	24050000	35024000	37962000	39143000	36164000	35528000	31966000	31225000	33392000	31162000	28444000	30653000	28654000	24212000
P62274	P62274	40S ribosomal protein S29	Rps29	6.6767	719600000	26816000	22750000	14549000	17579000	78577000	46537000	19228000	47607000	10777000	32359000	20087000	33269000	48089000	41699000	31356000	26564000	22289000	31382000	44421000	30731000	26448000	37764000	27278000	34609000	28653000	28181000	36044000	37864000
Q3TLH4;Q7TPM1	Q3TLH4	Protein PRRC2C	Prrc2c	310.89	718060000	65967000	43874000	50208000	7187800	26115000	57331000	13766000	33365000	33082000	22223000	80755000	23094000	32712000	12764000	61430000	51677000	64959000	6561300	19049000	38003000	22724000	36130000	37216000	28304000	105510000	23163000	33911000	9616100
Q9Z315	Q9Z315	U4/U6.U5 tri-snRNP-associated protein 1	Sart1	90.884	717840000	33714000	31429000	40808000	8242300	51353000	39185000	22805000	22218000	39717000	30960000	42162000	52687000	34649000	27293000	37995000	32841000	37505000	19643000	26377000	29522000	25680000	31966000	32095000	33716000	48662000	37804000	41586000	29669000
P48024;Q9CXU9	P48024;Q9CXU9	Eukaryotic translation initiation factor 1;Eukaryotic translation initiation factor 1b	Eif1;Eif1b	12.746	709540000	28799000	27241000	28628000	12788000	32480000	53352000	33250000	33156000	33112000	26382000	40161000	55290000	46162000	45254000	30587000	33036000	39787000	19072000	23026000	38590000	35975000	31168000	31374000	28483000	51291000	42438000	39348000	42916000
Q6IQY5	Q6IQY5	Centrosomal protein of 70 kDa	Cep70	71.064	709030000	32175000	24618000	27622000	18257000	30354000	36616000	31428000	31387000	30483000	25695000	30992000	36553000	33032000	29397000	32208000	32463000	37127000	24660000	22523000	27738000	32699000	30553000	31323000	29047000	39953000	31544000	31456000	28210000
Q9QUI0;Q62159;Q9CR99;P62746	Q9QUI0;Q62159	Transforming protein RhoA;Rho-related GTP-binding protein RhoC	Rhoa;Rhoc	21.782	706770000	22354000	19249000	22039000	6066600	50093000	38938000	31479000	20081000	20603000	47051000	25846000	21754000	49366000	53029000	16284000	15213000	16322000	13780000	26285000	37634000	60531000	32833000	28905000	37612000	20301000	27950000	41129000	47106000
Q8R080	Q8R080	G2 and S phase-expressed protein 1	Gtse1	78.751	706330000	45702000	32567000	44556000	15142000	72671000	77640000	30318000	36401000	34633000	32044000	6405800	16963000	19659000	16491000	41847000	45278000	51201000	25585000	32411000	48323000	38832000	27600000	28505000	33401000	16439000	29422000	22472000	23637000
P63280	P63280	SUMO-conjugating enzyme UBC9	Ube2i	18.007	705040000	31136000	21762000	5108500	7262100	45499000	46500000	50831000	22158000	28932000	23942000	12134000	40479000	34768000	40474000	42527000	24173000	19176000	27178000	29956000	30225000	49537000	24751000	28061000	25585000	23036000	28422000	27562000	37661000
P55821;P63042	P55821	Stathmin-2	Stmn2	20.828	704750000	22947000	20147000	34096000	5519400	18735000	38261000	31695000	32478000	28100000	30122000	56020000	52992000	64049000	74936000	22852000	25577000	44518000	7416400	14929000	27613000	32807000	31451000	29774000	34792000	76058000	49144000	60676000	76479000
P62331	P62331	ADP-ribosylation factor 6	Arf6	20.082	704140000	23238000	27630000	21588000	32813000	47647000	75447000	24873000	31309000	30962000	22638000	13177000	25998000	30332000	30810000	26438000	30722000	26996000	45809000	34568000	44704000	24770000	27095000	26122000	26298000	21187000	23522000	23724000	29039000
P61750	P61750	ADP-ribosylation factor 4	Arf4	20.396	703760000	28013000	3005300	22588000	21725000	45220000	85093000	55956000	3385000	36411000	28246000	7090700	24499000	26068000	21598000	23103000	21201000	24475000	57987000	32929000	43037000	45330000	19427000	34632000	31788000	10768000	23276000	24814000	20491000
P53564;P70298	P53564	Homeobox protein cut-like 1	Cux1	165.59	702600000	41968000	22248000	28545000	6569700	25492000	26138000	31399000	41824000	24039000	21666000	30500000	43457000	76437000	61869000	39740000	30813000	33794000	12434000	23661000	24487000	36295000	32312000	29855000	30306000	53363000	39068000	48969000	46731000
Q80U58	Q80U58	Pumilio homolog 2	Pum2	114.31	699100000	38016000	32160000	39271000	21338000	39888000	37926000	47355000	35173000	33448000	11484000	17693000	39417000	38822000	12040000	36865000	38300000	44545000	24115000	28409000	36047000	21477000	35175000	32513000	29545000	28615000	35999000	32289000	27921000
O70318	O70318	Band 4.1-like protein 2	Epb41l2	109.94	697070000	15007000	14290000	36936000	28577000	49631000	56243000	25038000	28159000	26752000	34271000	17352000	29899000	34346000	32919000	27629000	29347000	46357000	38676000	27543000	33644000	26214000	26250000	33910000	31593000	35362000	31356000	26062000	27895000
Q61043	Q61043	Ninein	Nin	243.72	695050000	25708000	9131600	6926100	11873000	14844000	13840000	0	31428000	18878000	15675000	167430000	68586000	58175000	77638000	28655000	4847700	9245200	13272000	16558000	12550000	0	23480000	11839000	21090000	228820000	83936000	47304000	91736000
Q8CGY8	Q8CGY8	UDP-N-acetylglucosamine--peptide N-acetylglucosaminyltransferase 110 kDa subunit	Ogt	116.95	692790000	27542000	21937000	10223000	31256000	37959000	73505000	29613000	14358000	27328000	18525000	2450800	18878000	31134000	19244000	27110000	25618000	21443000	39974000	34139000	37952000	30049000	24697000	25363000	30786000	4308500	20027000	22403000	27114000
Q921U8	Q921U8	Smoothelin	Smtn	100.29	692170000	38953000	36202000	31300000	6826700	54466000	25423000	27554000	17025000	24183000	32370000	33741000	55342000	34269000	27256000	47909000	29221000	29956000	24023000	30331000	19490000	25503000	33373000	32587000	29872000	44123000	43209000	40127000	38398000
P63087	P63087	Serine/threonine-protein phosphatase PP1-gamma catalytic subunit	Ppp1cc	36.983	691850000	17427000	30626000	26716000	24155000	41054000	40705000	26106000	17222000	28939000	24276000	24579000	41934000	34077000	37177000	25061000	37833000	34456000	32078000	29833000	29796000	27166000	24082000	29393000	26709000	34850000	39178000	31809000	37605000
Q8BQ30	Q8BQ30	Phostensin	Ppp1r18	65.629	691420000	41745000	25125000	34069000	11822000	37683000	50809000	25107000	33682000	20402000	19244000	47717000	41288000	33089000	35331000	39721000	33361000	37765000	34876000	28555000	29669000	28928000	32638000	25268000	23964000	54045000	30811000	27620000	31218000
Q7TNC4	Q7TNC4	Putative RNA-binding protein Luc7-like 2	Luc7l2	46.582	689400000	9622100	24940000	20887000	24748000	52982000	74742000	24498000	32644000	29135000	20514000	17815000	20234000	15563000	8671900	21474000	39630000	34090000	31790000	38827000	37041000	25698000	31837000	34141000	29881000	29045000	18695000	15722000	10731000
Q99JB2	Q99JB2	Stomatin-like protein 2, mitochondrial	Stoml2	38.384	688880000	26924000	9537600	31053000	19639000	39782000	46309000	31146000	40129000	32613000	32748000	7607900	25382000	62319000	34302000	23328000	17783000	28402000	27046000	32284000	21574000	40496000	33076000	31043000	30868000	12789000	25111000	63137000	28757000
Q9D2R0	Q9D2R0	Acetoacetyl-CoA synthetase	Aacs	75.199	687480000	13860000	4916200	18254000	36295000	25985000	68936000	38614000	23904000	15062000	28932000	4768300	38195000	38918000	36581000	28118000	16112000	21510000	41147000	25977000	36580000	29262000	22300000	20252000	26790000	13067000	33814000	31335000	32413000
Q64213	Q64213	Splicing factor 1	Sf1	70.402	683030000	31760000	20900000	33935000	14197000	51802000	60299000	33913000	24813000	35815000	30993000	23129000	38328000	35439000	25198000	32524000	35036000	38491000	29118000	32319000	37553000	29754000	33143000	30936000	28210000	30432000	25786000	31629000	23789000
Q9Z1N2	Q9Z1N2	Origin recognition complex subunit 1	Orc1	95.102	682110000	25008000	18655000	5474900	10934000	26690000	25739000	39486000	34107000	40467000	18332000	9843100	69074000	46750000	43393000	23282000	20257000	13561000	20205000	20974000	20398000	34154000	31386000	29559000	26051000	15346000	58518000	38415000	42424000
Q810D6	Q810D6	Glutamate-rich WD repeat-containing protein 1	Grwd1	49.223	680680000	50800000	31599000	992580	33840000	40820000	28175000	42372000	15767000	27651000	16017000	27922000	33438000	13732000	7896900	48437000	31707000	11587000	34388000	40514000	33545000	37171000	23086000	40838000	28275000	27861000	32634000	21991000	18728000
P58468	P58468	Protein FAM207A	Fam207a	24.814	674430000	8767100	43461000	17076000	29388000	52422000	30087000	35785000	13677000	27137000	16989000	8531200	33907000	18405000	9929600	20556000	45228000	27953000	31037000	26987000	20754000	29620000	33614000	25476000	29722000	17813000	27357000	20862000	17500000
Q9JKB1;P58321	Q9JKB1;P58321	Ubiquitin carboxyl-terminal hydrolase isozyme L3;Ubiquitin carboxyl-terminal hydrolase isozyme L4	Uchl3;Uchl4	26.151	673340000	3491800	16136000	29092000	6389200	50660000	47692000	24128000	31175000	33003000	25936000	18629000	37481000	42362000	38090000	14598000	24216000	33139000	13596000	41439000	21549000	29354000	24924000	35875000	30243000	26580000	23888000	30352000	34370000
O70310;O70311	O70310	Glycylpeptide N-tetradecanoyltransferase 1	Nmt1	56.888	671860000	21017000	6346600	6470500	11115000	50754000	61984000	17687000	17934000	36267000	34621000	2373100	58016000	43613000	21087000	18870000	24608000	27468000	19579000	28553000	33411000	30455000	26096000	32229000	28589000	9705200	33092000	30077000	34601000
P27782;Q00417;Q924A0;Q9Z1J1	P27782	Lymphoid enhancer-binding factor 1	Lef1	44.058	670670000	67931000	18483000	22965000	13130000	9287800	36831000	11306000	37508000	26001000	25396000	26606000	69161000	67531000	47365000	53204000	24325000	34198000	51478000	11074000	25346000	17422000	30216000	28462000	29542000	40549000	59458000	51564000	42836000
O88342	O88342	WD repeat-containing protein 1	Wdr1	66.406	668880000	12737000	14601000	16003000	3099800	28249000	50733000	27220000	22357000	23013000	20535000	29280000	62676000	51394000	44658000	14520000	25457000	25161000	8779500	22559000	33073000	30820000	23526000	32108000	28438000	30606000	48854000	32910000	43064000
Q3UJB9	Q3UJB9	Enhancer of mRNA-decapping protein 4	Edc4	152.48	666760000	40569000	39657000	36626000	23144000	31679000	83416000	19316000	35091000	29436000	14033000	5311500	25602000	22172000	11176000	38004000	36138000	31234000	40558000	27164000	41288000	27817000	31635000	32355000	25497000	15999000	20720000	24425000	14150000
Q8C5R8	Q8C5R8		Prps1l1	34.82	660500000	18095000	7398100	23931000	27030000	51899000	51778000	35736000	25521000	26541000	33162000	11079000	26066000	26044000	10649000	16934000	25615000	29853000	34304000	36731000	35866000	35020000	23437000	25697000	34339000	14807000	22961000	23983000	29640000
O09061	O09061	Proteasome subunit beta type-1	Psmb1	26.372	658390000	27436000	33669000	18378000	18546000	31290000	35187000	40203000	29203000	32900000	23341000	25771000	40218000	39284000	26418000	24049000	41319000	25754000	24708000	20725000	26040000	42166000	24347000	33892000	26547000	35881000	36023000	31715000	41759000
S4R1W1	S4R1W1	Glyceraldehyde-3-phosphate dehydrogenase	Gm3839	35.812	656500000	6322500	4663600	12381000	50137000	45869000	35000000	32564000	23414000	30824000	35526000	6021600	27014000	27688000	31315000	6385500	5924200	8778600	32085000	13859000	12963000	17453000	13853000	19513000	21470000	8191200	13695000	15184000	18255000
Q9JKB3	Q9JKB3	Y-box-binding protein 3	Ybx3	38.813	656380000	26768000	28062000	23670000	13443000	46066000	28521000	32815000	23357000	31460000	30672000	28233000	29789000	44168000	22220000	28612000	33993000	27389000	21025000	33284000	23853000	30734000	25042000	29665000	35785000	40140000	27864000	35705000	26386000
Q99P69	Q99P69	Kinetochore protein Nuf2	Nuf2	54.594	656300000	26634000	31973000	19007000	16477000	33700000	33006000	29183000	28086000	33556000	31299000	24358000	29936000	22030000	26013000	26451000	29496000	26724000	30969000	28523000	25334000	30829000	24211000	32790000	32691000	27264000	26142000	27159000	26942000
P32921	P32921	Tryptophan--tRNA ligase, cytoplasmic;T1-TrpRS;T2-TrpRS	Wars	54.357	655710000	17485000	10460000	12446000	32334000	43497000	38744000	19161000	25775000	23605000	15276000	9623300	20155000	26747000	8136700	17251000	14081000	23907000	37133000	30515000	29212000	22812000	26369000	26659000	21748000	16426000	18647000	24495000	21552000
Q9D6R2	Q9D6R2	Isocitrate dehydrogenase [NAD] subunit alpha, mitochondrial	Idh3a	39.638	655260000	13147000	6949100	13088000	15265000	28347000	20833000	50580000	31580000	33825000	26882000	9158400	24988000	85039000	46369000	18320000	10679000	16947000	25002000	18251000	18592000	29795000	29481000	27537000	30254000	42772000	32767000	59792000	36424000
O08579	O08579	Emerin	Emd	29.435	654770000	39674000	16157000	27085000	17534000	37008000	33404000	21600000	21872000	26525000	28405000	38268000	30598000	41543000	30869000	35199000	31293000	31884000	19450000	24689000	21098000	25834000	33569000	30751000	27819000	47559000	26481000	37392000	29562000
Q9QUJ7	Q9QUJ7	Long-chain-fatty-acid--CoA ligase 4	Acsl4	79.076	653630000	9726600	13741000	7316400	35724000	57158000	32509000	37267000	27358000	30083000	20622000	857930	32417000	24423000	20981000	13816000	17134000	21769000	40256000	37919000	30847000	31266000	26876000	32430000	28951000	4932400	24169000	27575000	24504000
Q8BJ71	Q8BJ71	Nuclear pore complex protein Nup93	Nup93	93.28	652990000	22384000	24183000	25429000	15585000	49817000	61711000	43800000	14972000	11120000	28337000	0	12556000	35726000	11955000	30908000	35395000	32522000	24869000	30768000	35212000	35793000	24919000	22026000	28812000	0	14791000	27259000	16912000
Q9CW46	Q9CW46	Ribonucleoprotein PTB-binding 1	Raver1	79.381	650110000	49935000	16812000	28699000	42429000	50070000	76790000	27252000	26454000	38084000	18154000	2608500	11927000	17359000	7487500	45686000	27433000	27369000	47913000	37802000	44073000	23386000	24035000	33763000	21459000	9054800	15751000	18195000	14286000
Q80XN0	Q80XN0	D-beta-hydroxybutyrate dehydrogenase, mitochondrial	Bdh1	38.299	639060000	40978000	16532000	11712000	21904000	38868000	64514000	21511000	24394000	21947000	17331000	10290000	41559000	47663000	93018000	29437000	22844000	26415000	27795000	22690000	33339000	39118000	27969000	23338000	24864000	25922000	39936000	60790000	47711000
Q5XJY5	Q5XJY5	Coatomer subunit delta	Arcn1	57.229	638900000	14127000	8312400	24093000	17487000	40529000	40515000	31085000	24692000	21324000	30309000	11740000	9342600	39404000	35789000	15376000	16712000	33383000	27962000	29913000	28076000	31334000	29568000	22733000	33510000	17566000	17107000	33728000	30234000
Q9DC33	Q9DC33	High mobility group protein 20A	Hmg20a	39.917	638880000	45235000	13192000	30209000	11385000	13263000	43447000	38802000	26107000	23804000	17443000	24182000	49374000	35205000	33421000	40427000	21522000	43072000	16582000	14259000	31120000	43038000	21900000	24711000	30502000	31678000	38544000	32311000	32608000
Q9CZW5	Q9CZW5	Mitochondrial import receptor subunit TOM70	Tomm70a	67.589	638670000	29345000	20425000	24759000	26902000	30144000	52193000	42366000	20332000	30093000	29984000	4714700	7790800	24687000	13918000	30311000	28724000	28379000	33467000	25643000	26508000	48598000	21139000	28893000	31618000	10879000	17309000	16339000	15852000
Q3UHX0	Q3UHX0	Nucleolar protein 8	Nol8	128.63	638030000	29730000	32566000	20384000	17823000	55291000	25843000	37435000	13571000	26769000	18709000	34216000	25380000	12239000	11217000	28040000	30921000	24983000	25688000	35001000	18121000	28852000	31335000	39651000	26165000	40648000	26258000	14745000	21790000
Q9ESZ8	Q9ESZ8	General transcription factor II-I	Gtf2i	112.26	637910000	28451000	22339000	25543000	31028000	45904000	66411000	44528000	14546000	23041000	22350000	0	8216700	8534000	10628000	25433000	28415000	25544000	31559000	28993000	47014000	38701000	25038000	28842000	30432000	0	10362000	10800000	7084100
Q99L28	Q99L28	Probable ribosome biogenesis protein RLP24	Rsl24d1	19.611	630960000	29125000	26057000	22335000	17320000	50231000	31776000	34121000	34521000	27121000	24390000	14306000	22056000	19602000	11184000	26539000	33521000	27936000	30643000	32658000	22001000	31310000	32045000	23905000	24608000	26072000	19082000	17638000	15028000
Q7TSC1	Q7TSC1	Protein PRRC2A	Prrc2a	229.2	629820000	64859000	49119000	40105000	2503900	50467000	43365000	29950000	10303000	22085000	40195000	48761000	20049000	31739000	16006000	38531000	44544000	56518000	9431100	22986000	28303000	38913000	16606000	23151000	49125000	63471000	19881000	22454000	20795000
Q3UA16	Q3UA16	Kinetochore protein Spc25	Spc25	26.457	629520000	27000000	25812000	22214000	29212000	27291000	36363000	42100000	16522000	25659000	27046000	18643000	22197000	20949000	21469000	27653000	31419000	25671000	32798000	24101000	27315000	40186000	22602000	24399000	27677000	28021000	20596000	19579000	22020000
Q8CHY6	Q8CHY6	Transcriptional repressor p66 alpha	Gatad2a	67.333	628840000	32645000	9745600	4216600	9421500	15943000	22138000	14894000	30181000	20250000	19247000	65338000	63390000	80170000	73016000	29219000	12360000	15736000	13780000	10383000	19812000	21629000	26922000	28773000	23268000	84710000	66607000	53047000	46886000
Q8BVI4	Q8BVI4	Dihydropteridine reductase	Qdpr	25.57	628220000	0	0	3439700	0	1855500	4145400	2391100	165460000	168550000	1867700	22891000	50353000	5719500	2741700	0	0	32082000	0	22434000	15482000	40538000	57961000	43451000	34403000	25749000	27661000	37226000	45831000
Q8C0C7	Q8C0C7	Phenylalanine--tRNA ligase alpha subunit	Farsa	57.598	627660000	40209000	26318000	19244000	22534000	47457000	44365000	9126900	19805000	32296000	20037000	11473000	3007700	6544700	7664500	31302000	25740000	22938000	30294000	32145000	28815000	16919000	22324000	24602000	24472000	24712000	14464000	13527000	12731000
E9PWW9	E9PWW9		Rsf1	161.75	627290000	30920000	15538000	47109000	7838800	19045000	47019000	23561000	30166000	27149000	31339000	34291000	61753000	45273000	42619000	37165000	23005000	49657000	11431000	10698000	23045000	23239000	34409000	28087000	30842000	51903000	44124000	44701000	42284000
O55131;Q9DA97;Q8C650	O55131	Septin-7	2007-09-01	50.549	626490000	13506000	13207000	21092000	19296000	31615000	41121000	28593000	32227000	34198000	27799000	24678000	11065000	23217000	30898000	19263000	23127000	27661000	22628000	24226000	25106000	29145000	27825000	33750000	25355000	42854000	14211000	17810000	24628000
Q9JLJ2	Q9JLJ2	4-trimethylaminobutyraldehyde dehydrogenase	Aldh9a1	53.514	625700000	15254000	12305000	11631000	13000000	37719000	35151000	16216000	23469000	28498000	28051000	6430900	23578000	29827000	29862000	17128000	14479000	19215000	24619000	28483000	23406000	28176000	23160000	27908000	23074000	18524000	21641000	20193000	26734000
Q9CQU5	Q9CQU5	ZW10 interactor	Zwint	28.713	625610000	26744000	30661000	15412000	23777000	46361000	32201000	30283000	34253000	28492000	21545000	15563000	15058000	14566000	26740000	25660000	36697000	30841000	32374000	32517000	20424000	23983000	29254000	27974000	24647000	30135000	14714000	22454000	23420000
P68433;P84244;P02301	P68433;P84244;P02301	Histone H3.1;Histone H3.3;Histone H3.3C	Hist1h3a;H3f3a;H3f3c	15.404	625110000	54723000	0	0	0	0	0	0	0	0	0	90679000	95093000	0	0	57143000	0	0	0	0	0	0	0	0	0	131900000	81595000	0	0
Q9R210;Q08874;Q64092;Q9WTW4	Q9R210	Transcription factor EB	Tfeb	52.614	621470000	31166000	32530000	16445000	17422000	44809000	28343000	11099000	30679000	30781000	21617000	45105000	21160000	52436000	24905000	23741000	30432000	21704000	21428000	19635000	16240000	14087000	29443000	26999000	25943000	47877000	33822000	31306000	26502000
Q6NV83	Q6NV83	U2 snRNP-associated SURP motif-containing protein	U2surp	118.26	621320000	21606000	33258000	38771000	23384000	42685000	36443000	29839000	10994000	12552000	23212000	9637700	31722000	37575000	23840000	28339000	39359000	39379000	24873000	26739000	36966000	37061000	21572000	24676000	32565000	13126000	23786000	30069000	26313000
Q60596	Q60596	DNA repair protein XRCC1	Xrcc1	68.97	620770000	16161000	8190600	11947000	6705300	9602900	19677000	8745200	8053300	8164100	8442700	7827900	394690000	14305000	14810000	37359000	21819000	34424000	28597000	22499000	27415000	20262000	24753000	26489000	21459000	34389000	32384000	23357000	25380000
P16330	P16330	2,3-cyclic-nucleotide 3-phosphodiesterase	Cnp	47.123	618310000	20341000	19370000	10720000	14238000	53624000	93603000	24468000	27767000	16666000	18729000	4746600	12262000	20947000	12187000	23028000	24936000	21527000	29722000	25352000	44955000	19454000	22899000	24028000	20690000	18823000	17981000	24278000	21072000
Q9WU78	Q9WU78	Programmed cell death 6-interacting protein	Pdcd6ip	96.023	616760000	18761000	29887000	23754000	5758200	52968000	40732000	18660000	26084000	22542000	38614000	21281000	33082000	45183000	32537000	23364000	27034000	33064000	16582000	30634000	30259000	21967000	28892000	32846000	31539000	30267000	23362000	35018000	26494000
Q9Z1M8	Q9Z1M8	Protein Red	Ik	65.615	616510000	36860000	18799000	44323000	30673000	28211000	16610000	47618000	29596000	15752000	32940000	20021000	17423000	28556000	31063000	34059000	35010000	40636000	26940000	28803000	24445000	27816000	22094000	24104000	28748000	19524000	20517000	25349000	24113000
Q8BVE8	Q8BVE8	Histone-lysine N-methyltransferase NSD2	Whsc1	152.25	616450000	27093000	20149000	30080000	10023000	33582000	29794000	20951000	37918000	25466000	22718000	6015200	37884000	38154000	46110000	25283000	25829000	34476000	25003000	22950000	24532000	22431000	24276000	24465000	21738000	14873000	42310000	31675000	36080000
P35278;P61021	P35278	Ras-related protein Rab-5C	Rab5c	23.412	616430000	2338000	13974000	7056700	3374800	44496000	35126000	21469000	32809000	19655000	24769000	20869000	45551000	59548000	49861000	10142000	20480000	20367000	14024000	26955000	28134000	27315000	25806000	27067000	24547000	30070000	34658000	38084000	37321000
P70290	P70290	55 kDa erythrocyte membrane protein	Mpp1	52.227	615830000	44383000	11389000	14146000	9324900	35905000	66221000	22707000	42671000	15130000	15688000	13622000	32729000	37661000	49185000	35127000	26829000	25405000	27923000	25139000	33243000	22997000	30538000	26522000	20656000	27887000	29771000	28584000	29371000
Q9D7S7	Q9D7S7	60S ribosomal protein L22-like 1	Rpl22l1	14.467	614290000	58985000	19010000	17360000	58568000	29347000	32606000	28256000	36689000	18786000	17602000	46577000	12991000	16503000	15779000	34075000	32235000	29724000	31732000	28409000	30860000	38533000	23454000	26073000	25960000	29575000	15699000	20502000	21119000
Q78IK2	Q78IK2	Up-regulated during skeletal muscle growth protein 5	Usmg5	6.3814	613860000	26966000	26045000	16561000	24631000	44298000	44062000	27714000	24148000	29640000	20756000	16185000	18521000	30015000	23900000	26655000	33296000	20975000	35439000	34520000	31674000	25550000	23541000	31060000	23767000	23251000	15851000	30498000	24287000
Q64523;Q6GSS7	Q64523;Q6GSS7	Histone H2A type 2-C;Histone H2A type 2-A	Hist2h2ac;Hist2h2aa1	13.988	613800000	41444000	34183000	0	65531000	22466000	39400000	7858300	26414000	21315000	26184000	31614000	19090000	27563000	0	42838000	45043000	0	91397000	17213000	18076000	8442700	26550000	22616000	30564000	45418000	18258000	27103000	0
Q8BPU7;Q8BHL5	Q8BPU7	Engulfment and cell motility protein 1	Elmo1	83.935	607880000	15319000	7053700	21850000	14472000	19853000	59837000	24839000	24012000	26214000	25916000	1643200	46981000	46379000	28503000	25143000	18182000	20046000	30349000	22752000	33258000	19842000	30936000	28868000	19910000	5842400	29146000	37853000	25153000
P10852	P10852	4F2 cell-surface antigen heavy chain	Slc3a2	58.336	606520000	11143000	16898000	13756000	4159700	29550000	29439000	24772000	21833000	32206000	24478000	30176000	48074000	69901000	54249000	17112000	21531000	21013000	7426200	23684000	19662000	30335000	26714000	27706000	27845000	42325000	43464000	52638000	47708000
Q61074	Q61074	Protein phosphatase 1G	Ppm1g	58.727	604830000	20106000	11138000	20463000	9646400	42557000	43167000	19414000	25938000	36123000	20051000	23014000	25545000	21792000	29445000	20098000	24011000	28120000	19108000	29065000	21874000	23079000	30113000	31452000	25688000	29663000	26518000	21185000	28739000
O70503	O70503	Very-long-chain 3-oxoacyl-CoA reductase	Hsd17b12	34.741	604350000	20844000	11345000	4416600	17189000	26792000	48902000	13866000	19679000	26233000	22150000	3980900	21536000	49923000	26741000	14863000	20622000	12723000	33145000	25912000	38675000	24168000	26777000	26105000	28703000	10679000	15439000	25562000	21284000
P19536	P19536	Cytochrome c oxidase subunit 5B, mitochondrial	Cox5b	13.813	603170000	23084000	16404000	31107000	15454000	28040000	21773000	40665000	29602000	25206000	27832000	20652000	23491000	33309000	37193000	23151000	22260000	34648000	19007000	20777000	16502000	34099000	25636000	27713000	26683000	27483000	22967000	30148000	32666000
Q9QZK7	Q9QZK7	Docking protein 3	Dok3	48.027	600870000	29409000	14990000	32293000	25075000	58454000	114410000	15454000	12867000	25985000	19853000	1352400	0	2962500	5715700	22436000	22662000	45500000	38096000	41907000	73729000	22180000	17228000	25737000	20797000	6507300	0	4072000	14606000
Q9JJ78	Q9JJ78	Lymphokine-activated killer T-cell-originated protein kinase	Pbk	36.744	599580000	26240000	20993000	20655000	20738000	49954000	43335000	33175000	27270000	25304000	27634000	5695100	15194000	18146000	21540000	24297000	21001000	28639000	36447000	34727000	34347000	39586000	23679000	26945000	32023000	15480000	13373000	15777000	22209000
Q9CQQ7	Q9CQQ7	ATP synthase F(0) complex subunit B1, mitochondrial	Atp5f1	28.948	598190000	3407100	22202000	25443000	11877000	19961000	6568200	40479000	22973000	37593000	34143000	25371000	16290000	59948000	20114000	11729000	21102000	28725000	14818000	18346000	12665000	31068000	25513000	27955000	30401000	23994000	26443000	49137000	30816000
P28474;Q64437	P28474	Alcohol dehydrogenase class-3	Adh5	39.547	597300000	13028000	10702000	13196000	15097000	52267000	30338000	23479000	19590000	18130000	17421000	11660000	28027000	20002000	35280000	13793000	15058000	21255000	23654000	25113000	22205000	25777000	22182000	26299000	23632000	22110000	21507000	17682000	23655000
Q9WUK2	Q9WUK2	Eukaryotic translation initiation factor 4H	Eif4h	27.341	596770000	21487000	18597000	26349000	17395000	29604000	26281000	41727000	27708000	21722000	22371000	28436000	40253000	35258000	47408000	18301000	28447000	27348000	20572000	24845000	22010000	33848000	30802000	26110000	21472000	33965000	32439000	31093000	42162000
P49710	P49710	Hematopoietic lineage cell-specific protein	Hcls1	54.24	594880000	10194000	21731000	30181000	1144400	20468000	24684000	52162000	31617000	28549000	13282000	46161000	51167000	46651000	70849000	14683000	20477000	27112000	6266100	13230000	12140000	55226000	24665000	31336000	18937000	92094000	45418000	32500000	68480000
Q9Z0P4	Q9Z0P4	Paralemmin-1	Palm	41.614	594070000	20805000	17669000	5761200	0	19736000	12920000	4681700	17162000	26236000	26492000	45959000	86192000	80580000	72113000	25743000	26907000	11657000	0	15491000	9342700	11773000	23726000	29421000	22138000	60934000	81336000	55325000	63790000
Q9CYG7	Q9CYG7	Mitochondrial import receptor subunit TOM34	Tomm34	34.278	592470000	23234000	18549000	20173000	16596000	42229000	41049000	26050000	36312000	26955000	20512000	12108000	21881000	17778000	22073000	19117000	25275000	25557000	29054000	32490000	29023000	26892000	25025000	24823000	23256000	18282000	21041000	21147000	21231000
Q9CZY3;Q9D2M8	Q9CZY3;Q9D2M8	Ubiquitin-conjugating enzyme E2 variant 1;Ubiquitin-conjugating enzyme E2 variant 2	Ube2v1;Ube2v2	16.355	590060000	13538000	12848000	22733000	13983000	32104000	37238000	32796000	24358000	18997000	18808000	20204000	25112000	31032000	33906000	18478000	20710000	27807000	25417000	28443000	23694000	29550000	23097000	25660000	29314000	25696000	18645000	26710000	29666000
P06745;CON__Q3ZBD7	P06745	Glucose-6-phosphate isomerase	Gpi	62.766	589950000	11986000	11705000	12648000	6927000	5837400	27654000	37582000	25081000	26854000	24029000	48937000	76032000	64228000	91462000	13503000	19066000	20655000	9849900	10507000	16350000	34145000	23676000	24712000	22012000	59468000	73092000	52847000	75179000
Q9D902	Q9D902	General transcription factor IIE subunit 2	Gtf2e2	33.046	589920000	27708000	24788000	23622000	13605000	38901000	38520000	21741000	21027000	16918000	21535000	33261000	30119000	37439000	25880000	31819000	32240000	31997000	21999000	24237000	26146000	24011000	20980000	24857000	27053000	35082000	25492000	35112000	20576000
Q99KG3	Q99KG3	RNA-binding protein 10	Rbm10	103.49	587380000	33032000	22994000	43662000	15381000	27766000	50071000	33671000	25679000	23421000	29399000	7833400	18785000	25978000	20800000	39010000	28590000	34467000	24968000	25082000	35059000	26258000	24315000	24365000	26538000	24555000	23511000	25159000	23259000
Q60960;O35345	Q60960	Importin subunit alpha-5;Importin subunit alpha-5, N-terminally processed	Kpna1	60.182	586940000	29845000	17655000	18302000	22935000	51311000	38542000	23425000	30203000	24589000	22126000	12847000	9922400	22963000	20526000	22954000	24018000	24450000	27765000	29812000	23824000	25044000	26447000	22995000	22697000	17924000	21451000	22975000	17179000
P59999	P59999	Actin-related protein 2/3 complex subunit 4	Arpc4	19.667	586460000	26964000	15248000	15703000	18532000	28822000	47073000	32784000	30802000	18778000	25170000	14546000	23988000	19275000	22824000	20021000	20896000	20981000	26443000	24990000	25700000	25580000	28879000	23601000	28606000	25770000	23081000	20129000	20558000
Q6NZF1	Q6NZF1	Zinc finger CCCH domain-containing protein 11A	Zc3h11a	86.491	585630000	21301000	25313000	35654000	24382000	55191000	65299000	30593000	25597000	21800000	21653000	3102200	15868000	11999000	11633000	26692000	28516000	42735000	28910000	27220000	34303000	26154000	23829000	23264000	21620000	10053000	15171000	17767000	13073000
Q9CY50	Q9CY50	Translocon-associated protein subunit alpha	Ssr1	32.065	583810000	26227000	16106000	13699000	15444000	37494000	33713000	38704000	30886000	26000000	28423000	9648900	16521000	32919000	23912000	20711000	28589000	24848000	30212000	24522000	22089000	35012000	23022000	24543000	26905000	24912000	13825000	28110000	21547000
Q8CFI7	Q8CFI7	DNA-directed RNA polymerase II subunit RPB2	Polr2b	133.91	583370000	21125000	13108000	17597000	24198000	48830000	46223000	27376000	18365000	28952000	10893000	1261600	16106000	23164000	19484000	22359000	17355000	22779000	22963000	31943000	32891000	30859000	23020000	26802000	20956000	4832200	20124000	24258000	18676000
Q9QXK7	Q9QXK7	Cleavage and polyadenylation specificity factor subunit 3	Cpsf3	77.504	582520000	25662000	18292000	23248000	12495000	43575000	63986000	37174000	23482000	25819000	19308000	4926000	21388000	25916000	14573000	24032000	24045000	25412000	24275000	27867000	35693000	27167000	24055000	23040000	20979000	10096000	18316000	20705000	22328000
Q9DAW6	Q9DAW6	U4/U6 small nuclear ribonucleoprotein Prp4	Prpf4	58.369	580920000	35593000	2254700	13911000	11268000	26262000	55994000	18167000	38849000	18921000	23831000	7248700	28747000	19647000	18751000	26897000	16934000	29284000	28777000	28712000	26779000	15045000	24238000	26414000	24769000	23741000	20277000	25046000	13594000
Q99L04	Q99L04	Dehydrogenase/reductase SDR family member 1	Dhrs1	34.005	580140000	25255000	19364000	13540000	30559000	26444000	52304000	24816000	36964000	25817000	24117000	11338000	20658000	17200000	11340000	18807000	18412000	17025000	35644000	18803000	20739000	24806000	26934000	25468000	28968000	13609000	20332000	15113000	12362000
D3Z3N4	D3Z3N4		Hnrnph3	36.869	580090000	24727000	23483000	28883000	28957000	37669000	51416000	35610000	26390000	30928000	28081000	6463500	16130000	21597000	26381000	24435000	24977000	38668000	32400000	27400000	31016000	31657000	23816000	26919000	27851000	17860000	19103000	19556000	25246000
Q9CZJ1	Q9CZJ1	Probable U3 small nucleolar RNA-associated protein 11	Utp11l	30.55	578830000	13206000	19440000	5512300	35996000	65473000	44654000	37949000	8156700	32228000	13484000	2204700	18777000	2136900	7970900	13235000	29881000	17939000	38934000	33722000	26286000	38459000	11569000	29676000	19779000	6225100	17481000	5179400	14891000
Q61191;Q9D968	Q61191	Host cell factor 1;HCF N-terminal chain 1;HCF N-terminal chain 2;HCF N-terminal chain 3;HCF N-terminal chain 4;HCF N-terminal chain 5;HCF N-terminal chain 6;HCF C-terminal chain 1;HCF C-terminal chain 2;HCF C-terminal chain 3;HCF C-terminal chain 4;HCF C-terminal chain 5;HCF C-terminal chain 6	Hcfc1	210.43	577830000	24378000	18813000	24729000	15314000	44691000	61531000	26696000	27917000	25493000	19596000	8605100	16899000	15996000	20463000	19435000	29485000	32701000	19450000	32986000	39422000	28317000	21123000	22979000	23848000	14157000	19975000	17867000	17011000
E9Q309	E9Q309		Cep350	346.45	577000000	33493000	19313000	6902900	5496000	17359000	13299000	2527000	18210000	21297000	21240000	147310000	47128000	36807000	33460000	30786000	32355000	13793000	7077800	12001000	7545400	1972500	17710000	36536000	17911000	180090000	52487000	46544000	47368000
Q9WUM4	Q9WUM4	Coronin-1C	Coro1c	53.12	575910000	24954000	15080000	13109000	7526400	17739000	25344000	10476000	15944000	28047000	30170000	52338000	64809000	57610000	33724000	21782000	18443000	13832000	20755000	15857000	14917000	17249000	25184000	29790000	21686000	70221000	54694000	42478000	36131000
Q8K205	Q8K205		Pop1	117.37	575870000	25188000	13425000	13294000	34708000	57620000	53311000	34780000	31132000	19750000	21777000	2618800	12085000	14093000	16275000	21606000	21519000	16336000	38275000	35488000	29800000	42361000	24110000	22464000	28658000	5668200	14506000	14127000	20100000
Q6ZWY8	Q6ZWY8	Thymosin beta-10	Tmsb10	5.0256	571980000	7909400	20502000	34966000	0	19750000	35688000	28455000	23563000	26601000	27861000	37641000	48954000	39494000	54622000	7909400	15559000	37242000	0	10543000	15777000	25486000	14804000	19872000	25885000	37393000	29987000	28460000	42506000
Q8C5L3	Q8C5L3	CCR4-NOT transcription complex subunit 2	Cnot2	59.71	571570000	13989000	27908000	31236000	7118200	39055000	63432000	26597000	23200000	28523000	26083000	4269500	29199000	6690200	32183000	34300000	24440000	25223000	22102000	26966000	30600000	22602000	21055000	25748000	23033000	17140000	18649000	18254000	19116000
Q9QZE5	Q9QZE5	Coatomer subunit gamma-1	Copg1	97.512	568050000	6951500	4607800	11197000	16183000	39960000	38389000	26514000	19600000	25833000	26734000	2763400	24985000	29541000	26422000	9006100	9483800	22287000	29354000	24094000	26365000	27735000	22144000	22090000	26466000	7223200	19128000	28495000	20278000
Q6PFR5	Q6PFR5	Transformer-2 protein homolog alpha	Tra2a	32.316	567450000	35291000	17728000	13374000	10218000	27501000	59953000	30607000	27609000	30544000	25851000	20835000	27594000	50676000	28284000	37107000	30119000	21742000	20028000	27376000	29005000	22971000	30818000	22938000	20546000	33919000	22781000	24998000	23746000
P35492	P35492	Histidine ammonia-lyase	Hal	72.257	567330000	27215000	68671000	8103900	5391900	39652000	2924900	8301000	25451000	15499000	11381000	0	0	1616000	7188100	28909000	72844000	12843000	19662000	24105000	5675500	15797000	20915000	20357000	16172000	0	0	974170	6650200
Q3UPL0	Q3UPL0	Protein transport protein Sec31A	Sec31a	133.57	567230000	15399000	4047300	18136000	5613600	71481000	64566000	32070000	19239000	18239000	29678000	3350800	6365600	24883000	10263000	25788000	18747000	23507000	20800000	27455000	25679000	28532000	23267000	21575000	17884000	11273000	15020000	21575000	16420000
O88712;P56546	O88712	C-terminal-binding protein 1	Ctbp1	47.744	565370000	14695000	19204000	28925000	7281900	37052000	40369000	33235000	20115000	27245000	25039000	2581700	19961000	22516000	27880000	21281000	21130000	29470000	18708000	21972000	28878000	24471000	22641000	23814000	28765000	14407000	17599000	21220000	19223000
Q91YR9	Q91YR9	Prostaglandin reductase 1	Ptgr1	35.56	563760000	11893000	18182000	21218000	15714000	45416000	54147000	25157000	27567000	19442000	15093000	8945100	13569000	8662400	10504000	16307000	21996000	23825000	22675000	34564000	34552000	26473000	16968000	23465000	18166000	17552000	11740000	10303000	14790000
P01872	P01872	Ig mu chain C region	Ighm	49.971	563300000	0	1934300	2343000	0	0	5091900	0	15920000	14684000	13863000	52908000	106640000	172220000	121610000	0	1942500	2249000	0	0	2541500	0	14213000	11583000	13087000	40683000	46986000	210160000	173870000
P70698;P70303	P70698	CTP synthase 1	Ctps1	66.682	561530000	17687000	5454300	14952000	10800000	44572000	53431000	18098000	16393000	20853000	30170000	5175500	18196000	33836000	15927000	19060000	12663000	24277000	24362000	26682000	28924000	18728000	20761000	22468000	27725000	17762000	14340000	25911000	16040000
Q8VDG3	Q8VDG3	Poly(A)-specific ribonuclease PARN	Parn	71.558	560020000	11142000	33219000	8725400	15112000	17750000	6640200	17881000	45644000	16901000	15186000	3365400	20464000	15070000	5278200	15596000	24447000	19055000	24249000	26671000	14494000	32428000	22476000	25188000	23948000	10551000	22129000	28199000	14167000
Q70FJ1	Q70FJ1	A-kinase anchor protein 9	Akap9	435.87	558910000	46964000	23311000	21385000	10845000	7889000	22741000	9900600	18311000	25517000	21023000	77204000	38814000	31221000	15325000	28551000	33453000	28375000	14942000	8873400	15300000	19232000	26276000	25317000	25535000	75515000	29613000	28925000	25113000
O88286	O88286	Protein Wiz	Wiz	184.29	557070000	15907000	16656000	34297000	8736500	13757000	47472000	25169000	23166000	27969000	19362000	11951000	38555000	47196000	49054000	20311000	22247000	33507000	14719000	12047000	29109000	30951000	24954000	25542000	29757000	20578000	31933000	30596000	36472000
Q8K0C9	Q8K0C9	GDP-mannose 4,6 dehydratase	Gmds	41.984	556330000	19607000	7561500	12100000	9391900	28628000	41487000	41874000	32932000	28382000	19708000	8621500	24424000	32844000	12376000	25256000	13846000	25568000	23544000	19706000	28644000	25083000	27425000	24004000	20034000	18672000	25713000	28557000	17198000
Q9D1M0	Q9D1M0	Protein SEC13 homolog	Sec13	35.565	554440000	33716000	18520000	16544000	22257000	37644000	45849000	21855000	27718000	18665000	11394000	12020000	24399000	23581000	17987000	27209000	28362000	23701000	25521000	26293000	31094000	22953000	25471000	25118000	16193000	19214000	20191000	24905000	19857000
Q9CQ65	Q9CQ65	S-methyl-5-thioadenosine phosphorylase	Mtap	31.062	554040000	14972000	12055000	11459000	16393000	41028000	32919000	22397000	30832000	14833000	17655000	11414000	28986000	20855000	43027000	20076000	23781000	20580000	16574000	25469000	29019000	29335000	26070000	24888000	22715000	22797000	19365000	22294000	31274000
P21956	P21956	Lactadherin	Mfge8	51.24	553430000	29962000	49327000	14273000	2398500	40315000	31591000	2331100	24647000	17680000	17982000	42405000	36318000	39814000	36326000	33618000	45437000	17212000	6584000	18185000	25916000	5979300	18393000	20656000	22280000	58374000	30276000	34355000	50489000
Q9Z110	Q9Z110	Delta-1-pyrroline-5-carboxylate synthase;Glutamate 5-kinase;Gamma-glutamyl phosphate reductase	Aldh18a1	87.265	552850000	1677500	4372700	8675400	13107000	21522000	38080000	27678000	24416000	21846000	22425000	7360900	24630000	79782000	36123000	5425500	8462800	14149000	16617000	15298000	29365000	21988000	26647000	26366000	27522000	15841000	20267000	56451000	35584000
Q8CGZ0	Q8CGZ0	Calcium homeostasis endoplasmic reticulum protein	Cherp	106.17	551590000	28422000	21474000	18433000	8748300	41287000	47177000	18514000	17916000	14237000	10977000	21005000	40821000	43366000	26585000	21058000	27111000	25886000	21719000	22111000	22015000	23023000	20631000	18853000	21785000	24179000	31340000	36742000	31371000
Q8BHY2	Q8BHY2	Nucleolar complex protein 4 homolog	Noc4l	58.675	550540000	22229000	8324600	2913200	17193000	46065000	52809000	38264000	31139000	7578700	16456000	2186700	28393000	16244000	7789900	19029000	20383000	14040000	37478000	29579000	28581000	33999000	19585000	17355000	20004000	6198900	21018000	15083000	16098000
Q61188	Q61188	Histone-lysine N-methyltransferase EZH2	Ezh2	85.291	547900000	15914000	7182700	17140000	10052000	40027000	38814000	24904000	19647000	28180000	24878000	11679000	19372000	29191000	15501000	27909000	13520000	18207000	15655000	26280000	23915000	27282000	24412000	25725000	18893000	13387000	24616000	22870000	17935000
P62315	P62315	Small nuclear ribonucleoprotein Sm D1	Snrpd1	13.281	545520000	0	20945000	23037000	19981000	40783000	46260000	30823000	18693000	20511000	15146000	0	11395000	23412000	15596000	0	26322000	27324000	38964000	22428000	24235000	24071000	34219000	20551000	31661000	0	16059000	17164000	13798000
Q8BX10	Q8BX10	Serine/threonine-protein phosphatase PGAM5, mitochondrial	Pgam5	31.994	545510000	36332000	15620000	22937000	26759000	47929000	22744000	5428200	28386000	16764000	23523000	40587000	35908000	16960000	2353700	31816000	21776000	27838000	31880000	25761000	18434000	19674000	17731000	26054000	25900000	42825000	22732000	21003000	20751000
Q62189	Q62189	U1 small nuclear ribonucleoprotein A	Snrpa	31.835	545240000	21164000	32875000	37953000	16224000	6136700	55731000	14020000	5083400	48611000	28839000	16223000	17492000	21476000	8191500	26602000	30539000	29073000	30940000	25981000	25064000	24081000	11659000	26618000	23557000	55940000	15448000	29983000	15377000
Q9D824	Q9D824	Pre-mRNA 3-end-processing factor FIP1	Fip1l1	64.958	544570000	38791000	27744000	26551000	17362000	40684000	38519000	16946000	19973000	21977000	23073000	23140000	38104000	22932000	10982000	29499000	26615000	31090000	27332000	22661000	20409000	15439000	19265000	22003000	24086000	39758000	22484000	21441000	17111000
O55201	O55201	Transcription elongation factor SPT5	Supt5h	120.66	543470000	22175000	3476200	13374000	21940000	38221000	39087000	36142000	13507000	22768000	26856000	4348400	8889300	9156200	8980300	14728000	12391000	25037000	28999000	21687000	34217000	26619000	16442000	18754000	25763000	11478000	18792000	15601000	18456000
P18572	P18572	Basigin	Bsg	42.444	541260000	18850000	14287000	30775000	5498600	22777000	28726000	22713000	24176000	28456000	24800000	11358000	44122000	58780000	42463000	23890000	27959000	28826000	11052000	14375000	18784000	23613000	25224000	23283000	24299000	31708000	36927000	39840000	32456000
Q9DCD0	Q9DCD0	6-phosphogluconate dehydrogenase, decarboxylating	Pgd	53.247	540400000	20408000	10848000	13995000	12351000	32317000	40358000	21751000	22898000	23116000	19356000	9925600	25486000	36953000	22147000	14975000	14363000	24216000	16021000	22566000	30136000	24689000	22007000	19839000	20486000	17003000	29715000	23962000	29820000
Q8C2K1	Q8C2K1	Differentially expressed in FDCP 6	Def6	73.453	539010000	20048000	20790000	24911000	24739000	26480000	45560000	31844000	16107000	21634000	22484000	5291300	6843200	18855000	19736000	16983000	26334000	24649000	28504000	22313000	23919000	27450000	18169000	24303000	25928000	9855400	8844500	15339000	14792000
Q9QY36;Q9CQX6;Q3UX61	Q9QY36;Q9CQX6;Q3UX61	N-alpha-acetyltransferase 10;N-alpha-acetyltransferase 11	Naa10;Gm16286;Naa11	26.519	536950000	10426000	7054100	7357500	8497400	37124000	34362000	28406000	19447000	21062000	24668000	5917300	13518000	12586000	10802000	12311000	11769000	11690000	13117000	24489000	18648000	28270000	18227000	21880000	23898000	16859000	12562000	18795000	16024000
Q8CGF7;Q3B807	Q8CGF7	Transcription elongation regulator 1	Tcerg1	123.79	535090000	35113000	11145000	30504000	4901200	36997000	48347000	21804000	18690000	21465000	19022000	8577700	10479000	16066000	17026000	27564000	2977500	41627000	13565000	22685000	31823000	27247000	20980000	23033000	25221000	16896000	19028000	18660000	25144000
Q8VEM8	Q8VEM8	Phosphate carrier protein, mitochondrial	Slc25a3	39.632	535000000	21035000	5557800	9223600	16507000	28143000	54429000	24325000	16766000	24305000	20377000	8300800	13825000	60301000	30183000	18248000	14868000	17516000	19659000	22046000	28023000	21722000	22515000	21709000	20757000	16742000	19076000	44059000	22884000
Q91WS0	Q91WS0	CDGSH iron-sulfur domain-containing protein 1	Cisd1	12.097	533930000	28012000	23596000	29265000	10296000	27497000	49385000	18740000	22137000	15643000	19727000	25889000	28274000	40710000	34171000	27412000	22863000	33203000	19566000	16272000	34144000	16622000	28981000	18022000	17364000	36090000	20151000	31624000	33461000
O35343	O35343	Importin subunit alpha-3	Kpna4	57.922	531680000	10752000	16089000	20989000	9791000	19721000	24334000	15522000	7107100	20301000	24000000	18306000	41695000	76676000	49229000	13766000	23789000	27264000	16915000	16797000	20007000	18419000	8849000	24172000	25249000	32578000	38172000	46781000	28022000
Q7TSF1;Q61495;Q7TSF0	Q7TSF1;Q61495;Q7TSF0	Desmoglein-1-beta;Desmoglein-1-alpha;Desmoglein-1-gamma	Dsg1b;Dsg1a;Dsg1c	114.45	530930000	46326000	39297000	8256000	4429300	19051000	1473800	4794600	36018000	28980000	11408000	1502600	8280300	2670800	5686600	31136000	67431000	27448000	9083400	17739000	2675300	14070000	38765000	21461000	14141000	5896700	6942000	5922500	5079100
Q8VCW8	Q8VCW8	Acyl-CoA synthetase family member 2, mitochondrial	Acsf2	67.95	529890000	17902000	17908000	43880000	2595800	14240000	67343000	12025000	34904000	18684000	6973900	22224000	33521000	67584000	55063000	22150000	28121000	40535000	12469000	11737000	48792000	14506000	22646000	23439000	17010000	30106000	31457000	46367000	51572000
Q8BSQ9	Q8BSQ9	Protein polybromo-1	Pbrm1	187.19	528510000	19558000	12305000	24416000	7198700	24417000	60552000	26680000	22906000	29559000	26253000	7331100	28587000	24013000	21190000	23032000	17793000	28567000	7774900	24475000	32664000	27858000	16531000	26440000	29461000	12263000	23323000	23341000	21277000
O70252	O70252	Heme oxygenase 2	Hmox2	35.738	527910000	17148000	14926000	7365900	17904000	27547000	43071000	23499000	17810000	25854000	16259000	13315000	17510000	50644000	26293000	19808000	17175000	17060000	23251000	18124000	26424000	22652000	22496000	20340000	17010000	28907000	20215000	34711000	22851000
P47964	P47964	60S ribosomal protein L36	Rpl36	12.215	527620000	41011000	8066200	29864000	22558000	37601000	57934000	41255000	22022000	7001700	18764000	11654000	15904000	16138000	17009000	23728000	25650000	24542000	20881000	22424000	25009000	28244000	17264000	18613000	17680000	25682000	11634000	19308000	11217000
P28843	P28843	Dipeptidyl peptidase 4;Dipeptidyl peptidase 4 membrane form;Dipeptidyl peptidase 4 soluble form	Dpp4	87.436	525010000	95477000	70626000	11895000	0	8551400	23041000	5786500	14795000	18678000	35201000	25923000	11187000	14367000	12284000	76597000	71861000	31371000	0	12962000	24950000	11386000	14588000	21790000	25568000	27926000	17426000	23179000	23546000
P70288	P70288	Histone deacetylase 2	Hdac2	55.302	524540000	6436900	0	14596000	0	32768000	29283000	13203000	24793000	16917000	29897000	23892000	40539000	48241000	48175000	23919000	0	22422000	0	20048000	15841000	30137000	28248000	20347000	30321000	30316000	30407000	39419000	37052000
P62838;P61079;P61080;Q6ZWY6	P62838;P61079;P61080;Q6ZWY6	Ubiquitin-conjugating enzyme E2 D2;Ubiquitin-conjugating enzyme E2 D3;Ubiquitin-conjugating enzyme E2 D1;Ubiquitin-conjugating enzyme E2 D2B	Ube2d2;Ube2d3;Ube2d1;Ube2d2b	16.735	523650000	6946500	16953000	4677000	21855000	43463000	43487000	23437000	24090000	20252000	22237000	16056000	6145400	33462000	19589000	19124000	20079000	16956000	31095000	28820000	23923000	23598000	21781000	18694000	21574000	19463000	15655000	28693000	19028000
Q6ZQ08	Q6ZQ08	CCR4-NOT transcription complex subunit 1	Cnot1	266.8	522370000	20719000	13817000	16434000	19062000	44971000	56377000	11291000	16687000	18560000	11850000	1846500	25282000	30086000	14190000	18986000	14226000	19740000	28529000	26014000	30499000	22254000	21470000	18438000	24598000	4471800	17565000	23530000	10983000
Q7TSI3	Q7TSI3	Serine/threonine-protein phosphatase 6 regulatory subunit 1	Ppp6r1	94.526	521300000	28952000	13978000	15564000	33515000	23617000	36031000	12679000	33672000	15883000	22557000	12688000	15770000	36773000	2690900	20014000	17378000	25597000	32246000	21027000	24690000	18566000	24186000	19979000	24814000	19452000	13871000	30218000	16735000
Q3U1F9	Q3U1F9	Phosphoprotein associated with glycosphingolipid-enriched microdomains 1	Pag1	46.549	519970000	47099000	26151000	12983000	2869900	17704000	11493000	3468200	23319000	15544000	23819000	42116000	44709000	50843000	46955000	37955000	31350000	15430000	7892900	16710000	11490000	6948100	21748000	19844000	24743000	60472000	37268000	41731000	50434000
P18654	P18654	Ribosomal protein S6 kinase alpha-3	Rps6ka3	83.693	519160000	9148400	10717000	16351000	47534000	31665000	60016000	28504000	23564000	18408000	4623500	0	7308200	13911000	14282000	23331000	18539000	15621000	45266000	30454000	34712000	21684000	22868000	20719000	14911000	0	7549900	9255500	15441000
Q8K301	Q8K301	Probable ATP-dependent RNA helicase DDX52	Ddx52	67.473	515390000	11530000	15696000	2985400	21941000	44447000	53874000	39241000	25802000	25685000	13836000	2351400	15310000	12442000	9661700	17554000	15412000	8070500	35012000	28179000	24950000	29646000	23186000	18564000	23571000	8703200	18190000	13916000	15807000
P53569	P53569	CCAAT/enhancer-binding protein zeta	Cebpz	120.26	513960000	19139000	9001200	3201300	35944000	54595000	48798000	47349000	30117000	18708000	17310000	2815500	8606100	7257300	6099900	18615000	21654000	7081800	40004000	28379000	27285000	42887000	22889000	26520000	19415000	4647800	7846700	10342000	12984000
P97386	P97386	DNA ligase 3	Lig3	113.07	511560000	28483000	10499000	17595000	9560600	23917000	57463000	28294000	19768000	26876000	19261000	5730200	30595000	29763000	28269000	31263000	21660000	20057000	20306000	15509000	29137000	26750000	23763000	23796000	20220000	21025000	26404000	21376000	25528000
P39749	P39749	Flap endonuclease 1	Fen1	42.314	510890000	17121000	12257000	14263000	19104000	34486000	29391000	20591000	17195000	21853000	15246000	15273000	14559000	38536000	22078000	20280000	17063000	27216000	20374000	22411000	18658000	23766000	18166000	23172000	21968000	25277000	12462000	23813000	18069000
O54734	O54734	Dolichyl-diphosphooligosaccharide--protein glycosyltransferase 48 kDa subunit	Ddost	49.027	509340000	21375000	3059400	1828300	12261000	28236000	32148000	31692000	20053000	20809000	8738100	14613000	5159400	52386000	22947000	12230000	15158000	13679000	23726000	17630000	17908000	28060000	20420000	22804000	22839000	15598000	13712000	34715000	20849000
Q6A0A2	Q6A0A2	La-related protein 4B	Larp4b	81.626	508420000	23123000	11148000	13853000	27150000	28210000	29957000	20612000	19382000	24183000	27221000	15244000	15472000	23805000	19577000	32443000	24096000	27226000	22708000	20642000	22888000	17505000	25589000	21101000	17607000	30106000	13136000	20141000	16028000
P30285	P30285	Cyclin-dependent kinase 4	Cdk4	33.75	508370000	27735000	17223000	21318000	22285000	44835000	50063000	18296000	25229000	30982000	32054000	0	0	0	4923100	29664000	26724000	26681000	27305000	29013000	31614000	27275000	23363000	21876000	26547000	0	0	0	12975000
P17897	P17897	Lysozyme C-1	Lyz1	16.794	507540000	29825000	41307000	10274000	13498000	35978000	9250200	10474000	25506000	21777000	17782000	3052800	4459900	0	4562900	30567000	53969000	13806000	18666000	27333000	6870600	11158000	25420000	22911000	20581000	4584400	4229600	0	5025200
P49025	P49025	Citron Rho-interacting kinase	Cit	235.39	507310000	15743000	9422900	11362000	4169400	18010000	15308000	5191200	24307000	15744000	14066000	45938000	64465000	75903000	49370000	17043000	14017000	16453000	2733500	16002000	12396000	7865300	23169000	26268000	21614000	72434000	45597000	54733000	48579000
O08915	O08915	AH receptor-interacting protein	Aip	37.605	506440000	9338100	13763000	11509000	15095000	32651000	53021000	20390000	22517000	13178000	8884500	5597200	28002000	25258000	13101000	16066000	18219000	18886000	29420000	28753000	20716000	26174000	19448000	21252000	17560000	15307000	17479000	19174000	19650000
Q9D7H3	Q9D7H3	RNA 3-terminal phosphate cyclase	RtcA	39.254	504770000	25633000	16948000	17574000	18778000	31259000	54426000	33657000	24037000	26496000	17516000	2857200	14907000	21075000	16225000	25394000	16823000	21948000	24653000	20853000	31630000	32036000	22541000	18831000	22313000	8329800	20424000	19629000	18899000
P39054;Q8BZ98	P39054	Dynamin-2	Dnm2	98.144	499770000	9011500	4304200	5559100	29666000	40339000	46664000	13084000	21806000	8995900	15939000	3588100	8700700	27910000	13544000	12513000	15116000	12546000	33530000	25000000	30424000	19256000	16297000	15984000	20343000	9446000	13800000	26271000	13335000
P63154	P63154	Crooked neck-like protein 1	Crnkl1	83.415	499660000	22878000	16298000	17499000	31709000	31937000	42889000	34734000	22601000	22552000	12883000	917610	13733000	20123000	18924000	18192000	14991000	25346000	29819000	21561000	29242000	27138000	20834000	25467000	19727000	6779000	19911000	16995000	16859000
P08775	P08775	DNA-directed RNA polymerase II subunit RPB1	Polr2a	217.17	499190000	21306000	10494000	8959100	12752000	49003000	40661000	18939000	23324000	19047000	20574000	5092800	14264000	15370000	13869000	13306000	20360000	21428000	21408000	29427000	22424000	21291000	16299000	23533000	20877000	11299000	17166000	15950000	16111000
Q9Z0H3	Q9Z0H3	SWI/SNF-related matrix-associated actin-dependent regulator of chromatin subfamily B member 1	Smarcb1	44.141	499100000	18125000	7635800	24100000	9936800	24239000	32922000	16901000	14266000	20967000	19719000	16829000	42634000	51275000	44458000	21306000	16429000	26276000	15536000	14903000	22252000	19915000	24316000	22118000	23239000	24015000	29872000	28066000	31118000
O54984	O54984	ATPase Asna1	Asna1	38.822	497960000	27208000	13909000	5431000	29134000	26585000	49719000	22393000	10841000	15569000	30907000	6642800	6827200	14935000	16404000	17110000	15649000	10599000	44159000	25251000	34116000	28923000	21383000	17424000	23643000	12972000	14011000	19244000	13855000
Q91YR7	Q91YR7	Pre-mRNA-processing factor 6	Prpf6	106.72	497500000	5854500	15988000	22820000	19508000	53193000	39267000	23125000	24253000	22959000	32226000	4616000	9703700	10927000	7093100	6967900	11825000	27101000	19943000	27908000	30280000	25973000	24125000	25784000	31170000	12247000	12118000	14866000	13806000
Q3UA06	Q3UA06	Pachytene checkpoint protein 2 homolog	Trip13	48.376	493330000	17564000	17198000	12318000	30185000	38551000	48472000	28086000	19338000	15600000	18906000	2757400	14447000	13197000	10242000	23860000	17071000	17801000	33674000	24595000	29856000	23873000	23313000	17884000	16697000	9473400	13806000	13963000	10656000
P63073	P63073	Eukaryotic translation initiation factor 4E	Eif4e	25.053	493290000	38100000	14678000	20266000	9947500	34643000	40024000	24128000	27009000	27346000	7887200	5579400	15371000	33703000	6846400	30107000	16236000	23796000	17569000	17688000	22141000	20657000	16114000	23592000	16038000	20071000	18987000	24101000	20585000
Q9D8M4	Q9D8M4	60S ribosomal protein L7-like 1	Rpl7l1	28.543	490270000	13143000	16081000	11694000	30908000	49903000	36888000	22492000	12053000	10042000	18380000	2369600	15789000	22032000	18092000	15616000	20387000	13178000	32707000	28946000	24498000	28570000	18535000	24052000	18791000	7684800	14721000	16477000	25854000
P49452	P49452	Centromere protein C	Cenpc	102.15	489690000	12767000	18311000	13985000	17225000	24753000	21478000	16766000	23618000	14719000	23258000	10549000	57344000	28646000	46887000	21083000	31333000	20215000	20395000	14447000	26922000	19150000	22140000	16144000	19572000	15767000	36832000	28664000	34672000
P62141	P62141	Serine/threonine-protein phosphatase PP1-beta catalytic subunit	Ppp1cb	37.186	487350000	26441000	13432000	19815000	18309000	5700600	50641000	18061000	27714000	19770000	25539000	11506000	20930000	21053000	33773000	16427000	19208000	20954000	20480000	13646000	19919000	24722000	21220000	24513000	24088000	21334000	26771000	25173000	28964000
Q80TP3	Q80TP3	E3 ubiquitin-protein ligase UBR5	Ubr5	308.35	487290000	11839000	18943000	14854000	20661000	43920000	50234000	34760000	17846000	26909000	21014000	2392300	5624300	4236400	8109400	14984000	22131000	25520000	26764000	21993000	34136000	37277000	14909000	20163000	20186000	8262800	9784400	9544500	12504000
P57725;P59808	P57725	SAM domain-containing protein SAMSN-1	Samsn1	41.601	485580000	19519000	14544000	39741000	21816000	21010000	59159000	22087000	23027000	15964000	23258000	1528200	2489800	7613500	5572900	18614000	20740000	30338000	32894000	20396000	32860000	14783000	28103000	20164000	17703000	7652600	8244100	9609400	7434700
Q9CPS7	Q9CPS7	RNA-binding protein PNO1	Pno1	27.453	483690000	16414000	12623000	11536000	24941000	34507000	34106000	36422000	14959000	20431000	23481000	4833800	12275000	18607000	18267000	13505000	14921000	11452000	20102000	20205000	17838000	34580000	13415000	22086000	20763000	9636400	10409000	16899000	15451000
Q9DC51;P20612;Q3V3I2;P50149;P18872;Q8CGK7	Q9DC51	Guanine nucleotide-binding protein G(k) subunit alpha	Gnai3	40.538	480360000	10284000	21292000	10094000	8283300	33760000	23239000	8432300	13463000	23411000	17366000	11072000	42180000	41991000	37047000	20940000	23509000	13455000	15823000	15090000	15456000	10539000	19838000	18696000	19422000	25926000	27423000	31355000	31113000
Q99JY0	Q99JY0	Trifunctional enzyme subunit beta, mitochondrial;3-ketoacyl-CoA thiolase	Hadhb	51.386	479050000	24193000	11636000	20616000	23394000	11753000	54783000	33404000	23854000	23047000	22374000	4542300	24252000	26570000	19699000	23113000	22251000	25250000	27928000	15449000	29191000	29676000	17874000	20841000	21379000	11981000	20980000	24075000	23784000
Q61827	Q61827	Transcription factor MafK	Mafk	17.537	479030000	25364000	17079000	9852500	20366000	30548000	13373000	36581000	12666000	26771000	16903000	11996000	23125000	16089000	13997000	20802000	21788000	14508000	23214000	22577000	8360300	31259000	13193000	25166000	19450000	16719000	15780000	13948000	15379000
Q9JLF6	Q9JLF6	Protein-glutamine gamma-glutamyltransferase K	Tgm1	89.825	478130000	33255000	30483000	15029000	4055600	30562000	11092000	13168000	15075000	20932000	14097000	2955600	4661000	1040800	4851200	30540000	32344000	15401000	8324300	20508000	8746900	15720000	16743000	21174000	12528000	4440700	5625100	2162200	9241100
P14576;E9PXC0	P14576;E9PXC0	Signal recognition particle 54 kDa protein	Srp54;Srp54c	55.72	478050000	13403000	15001000	9317100	21303000	31280000	38126000	22103000	9853600	12504000	23443000	5254500	32031000	34450000	18043000	24488000	10539000	17150000	23950000	19882000	19015000	25896000	14704000	20471000	21658000	17147000	19618000	34203000	25102000
Q9D287	Q9D287	Pre-mRNA-splicing factor SPF27	Bcas2	26.131	474630000	25179000	0	17959000	0	45428000	37882000	15631000	24437000	4179100	25807000	4478900	17174000	33448000	20110000	21544000	0	29189000	0	23994000	17222000	18770000	22209000	16883000	24978000	27250000	21552000	22668000	25547000
Q9DBC7	Q9DBC7	cAMP-dependent protein kinase type I-alpha regulatory subunit;cAMP-dependent protein kinase type I-alpha regulatory subunit, N-terminally processed	Prkar1a	43.185	472990000	7330500	4372400	22946000	5270200	31686000	46494000	7373500	32696000	25574000	25737000	18328000	21390000	19938000	23231000	16696000	15883000	27973000	22877000	19860000	26861000	17579000	21743000	23128000	21134000	21281000	18893000	18745000	19920000
Q9D0W5	Q9D0W5	Peptidyl-prolyl cis-trans isomerase-like 1	Ppil1	18.237	472180000	8049400	14688000	25743000	3158900	35406000	41571000	26674000	7320000	15110000	20485000	16467000	14963000	14616000	8089200	15083000	16282000	25341000	6752700	18727000	13361000	24948000	11803000	10852000	15628000	23043000	11621000	11923000	13450000
Q05CL8;A2AMD0	Q05CL8;A2AMD0	La-related protein 7	Larp7;Gm12666	64.802	471330000	20449000	14338000	40871000	17011000	24876000	55514000	27441000	21410000	23438000	14345000	535150	461240	2272400	4524500	21269000	23556000	45555000	21895000	21423000	34184000	20784000	14083000	21842000	20040000	2766200	1669500	8318900	9897200
O54946;Q9QYI8;Q9QYI5	O54946	DnaJ homolog subfamily B member 6	Dnajb6	39.807	471320000	46095000	9622700	41157000	16932000	23092000	28795000	15084000	14591000	29860000	29619000	15375000	16419000	19336000	14272000	24363000	22835000	31575000	18315000	22974000	21414000	21132000	22694000	23196000	21861000	17217000	19422000	21127000	17765000
Q8C147	Q8C147	Dedicator of cytokinesis protein 8	Dock8	238.98	471300000	22601000	15972000	9604900	8152300	38439000	48541000	15782000	16512000	18577000	13936000	0	3221400	2537200	5976000	16798000	22668000	19561000	13715000	23019000	34471000	19174000	16890000	17150000	14168000	0	7784100	6644500	9359200
Q920E5	Q920E5	Farnesyl pyrophosphate synthase	Fdps	40.581	470800000	5413200	4052900	9219500	0	14265000	13720000	41121000	20911000	27365000	20591000	17006000	51645000	42310000	47204000	16097000	15429000	19725000	0	10800000	16007000	31055000	20300000	17651000	26523000	29398000	27278000	33933000	35140000
P43346	P43346	Deoxycytidine kinase	Dck	30.367	468930000	2803000	2345000	11774000	0	389370000	4254400	0	4246600	11878000	1898800	3208600	0	3520900	5350800	15538000	17123000	22154000	0	24214000	17660000	0	23653000	17264000	12179000	23699000	0	18268000	31410000
Q0VBL3	Q0VBL3		Rbm15	105.72	468510000	9518300	7643200	17082000	19449000	41708000	57773000	31417000	17840000	13841000	6903100	7842200	23604000	15680000	6972100	21373000	20118000	28256000	23654000	20236000	34233000	18287000	20136000	16956000	18177000	14011000	15507000	16315000	11685000
P70677	P70677	Caspase-3;Caspase-3 subunit p17;Caspase-3 subunit p12	Casp3	31.474	466240000	13815000	17929000	13560000	13221000	37797000	43104000	15433000	15921000	22522000	19417000	9136700	9274700	9565900	16259000	12482000	19911000	22488000	22931000	23830000	25768000	20602000	16763000	18812000	18153000	14448000	13737000	11323000	15160000
Q09XV5	Q09XV5	Chromodomain-helicase-DNA-binding protein 8	Chd8	290.84	466190000	30863000	23217000	8279600	4793500	26581000	22990000	24879000	15439000	22206000	18719000	3057100	11775000	15405000	12218000	27186000	22652000	16088000	9668100	17722000	16069000	16365000	15950000	19670000	15971000	10035000	10351000	25021000	34990000
Q9CR26	Q9CR26	Vacuolar protein sorting-associated protein VTA1 homolog	Vta1	33.913	465630000	32948000	35196000	17242000	17305000	32663000	14994000	30577000	29907000	31636000	3610800	5118100	4977300	8983400	9925600	24649000	37294000	16113000	19407000	32888000	24661000	20707000	19114000	15824000	11956000	20405000	12311000	21316000	15296000
P28650	P28650	Adenylosuccinate synthetase isozyme 1	Adssl1	50.254	464220000	2610000	5388800	2720800	7117200	63803000	14265000	34579000	15049000	14014000	3568500	0	2836000	2729500	1816100	8453800	15206000	9662000	22777000	33436000	13497000	20584000	15225000	17744000	12319000	0	8742900	8650900	6259500
Q91YK2	Q91YK2	Ribosomal RNA processing protein 1 homolog B	Rrp1b	80.581	463360000	18274000	16245000	20217000	23758000	45458000	33553000	16101000	17337000	25654000	13036000	3506400	12239000	5841400	4670300	16464000	19929000	17873000	30130000	31805000	25332000	16074000	18958000	19309000	22914000	8730800	15675000	9241000	21603000
Q8C570	Q8C570	mRNA export factor	Rae1	40.965	462800000	19853000	0	6643500	16935000	34300000	33253000	35707000	15606000	14711000	15951000	4346000	7375500	4799000	14811000	22674000	0	22921000	21899000	22598000	26176000	32805000	22769000	20501000	15402000	8722500	11689000	11832000	13597000
P70404	P70404	Isocitrate dehydrogenase [NAD] subunit gamma 1, mitochondrial	Idh3g	42.785	462520000	12231000	0	20715000	12075000	27151000	11002000	40056000	21331000	11608000	25344000	5750500	19471000	38285000	25646000	16238000	0	17461000	22192000	22210000	23863000	25052000	16502000	18598000	22324000	17212000	16577000	26737000	24101000
Q61176	Q61176	Arginase-1	Arg1	34.807	462230000	54291000	57056000	5415600	1799800	17377000	0	0	30226000	8098200	0	0	0	0	0	34638000	45215000	21528000	7799500	39054000	0	0	14887000	25204000	0	0	0	0	0
[truncated: 1,572 more rows]
