# Supplementary material for: Hbo1 and Msl complexes preserve differential compaction and H3K27me3 marking of active and inactive X chromosomes during mitosis
Source: Research Square preprint supplement (doi:10.21203/rs.3.rs-4687808/v1), 2024-07-16
Supplement: Supplementary file 3 [file a3aac6743ab50df9e976b0ab.xlsx]

## Sheet: Acetyl (K)Sites_expanded_sites_
	Protein names	Gene names	Intensity Female_chrXa_1	Intensity Female_chrXa_2	Intensity Female_chrXa_3	Intensity Female_chrXi_1	Intensity Female_chrXi_2	Intensity Female_chrXi_3	Intensity Female_chrXi_4	Intensity Male_chrX_1	Intensity Male_chrX_2	Intensity Male_chrX_3	Intensity Male_chrX_4	Positions within proteins	Amino acid	Acetyl (K) Probabilities	Number of Acetyl (K)	Protein group IDs	Multiplicity	Localization prob	PEP	Position	Proteins	Positions within proteins	Leading proteins	Protein	Protein names	Gene names	Sequence window	id	Unique identifier
	Transketolase-like protein 2	Tktl2	6010900	0	10177000	10780000	9925200	0	4804000	18992000	13152000	6704200	8104200	237	K	AAQVK(0.5)NK(0.5)PTALIAK	1	2628	___1	0.5	0.00145947	237	Q9D4D4	237	Q9D4D4	Q9D4D4	Transketolase-like protein 2	Tktl2	DVEALCQAFWKAAQVKNKPTALIAKTFKGRG	137	UID138
	Transketolase-like protein 2	Tktl2	6010900	0	10177000	10780000	9925200	0	4804000	18992000	13152000	6704200	8104200	239	K	AAQVK(0.5)NK(0.5)PTALIAK	1	2628	___1	0.5	0.00145947	239	Q9D4D4	239	Q9D4D4	Q9D4D4	Transketolase-like protein 2	Tktl2	EALCQAFWKAAQVKNKPTALIAKTFKGRGIP	138	UID139
	ATP-dependent zinc metalloprotease YME1L1	Yme1l1	158570000	82062000	30665000	0	0	56106000	0	17682000	0	0	0	516	K	AAVDGKEMVTMK(0.001)ELEFSK(0.999)DK	1	407	___1	0.998775	0.000485853	516	O88967	516	O88967	O88967	ATP-dependent zinc metalloprotease YME1L1	Yme1l1	VDGKEMVTMKELEFSKDKILMGPERRSVEID	44	UID45
	Calmodulin-regulated spectrin-associated protein 2	Camsap2	0	0	966630	1439200	0	0	0	0	0	2640000	0	804	K	AK(0.999)ERESQK(0.001)MDGQR		1867	___1	0.998619	0.0186377	804	Q8C1B1	804	Q8C1B1	Q8C1B1	Calmodulin-regulated spectrin-associated protein 2	Camsap2	EAAGAEDEKVYTDRAKERESQKMDGQRSKSL	114	UID115
	Tropomyosin alpha-4 chain	Tpm4	0	40064000	31135000	22931000	0	39664000	0	0	28282000	0	0	104	K	AMK(0.457)DEEK(0.543)MEILEMQLK	1	1475	___1	0.543325	0.00454248	104	Q6IRU2	104	Q6IRU2	Q6IRU2	Tropomyosin alpha-4 chain	Tpm4	RGMKVIENRAMKDEEKMEILEMQLKEAKHIT	96	UID97
	Cytoskeleton-associated protein 2-like	Ckap2l	89068000	90296000	80196000	84218000	110410000	85146000	127270000	104050000	133560000	94373000	95272000	421	K	AQTLDSK(0.214)FRK(0.786)FPPQSHFLNK	1	1609	___1	0.785852	0.000292687	421	Q7TS74	421	Q7TS74	Q7TS74	Cytoskeleton-associated protein 2-like	Ckap2l	NIFQQKAQTLDSKFRKFPPQSHFLNKTAPRT	101	UID102
	Cytoskeleton-associated protein 2-like	Ckap2l	0	0	0	84218000	0	0	0	0	0	0	0	418	K	AQTLDSK(0.519)FRK(0.481)FPPQSHFLNK	1	1609	___1	0.518818	0.00149515	418	Q7TS74	418	Q7TS74	Q7TS74	Cytoskeleton-associated protein 2-like	Ckap2l	KYNNIFQQKAQTLDSKFRKFPPQSHFLNKTA	100	UID101
	Histone H2B type 1-F/J/L;Histone H2B type 1-K;Histone H2B type 1-P;Histone H2B type 1-C/E/G;Histone H2B type 1-M;Histone H2B type 3-B;Histone H2B type 2-E	Hist1h2bf;Hist1h2bk;Hist1h2bp;Hist1h2bc;Hist1h2bm;Hist3h2bb;Hist2h2be	0	4903700	2931900	0	2572400	2356400	0	0	0	0	2792800	24;24;24;24;24;24;24	K	AVTK(1)AQK(1)K	2	1577;1942;474	___2	1	0.00146137	24	P10853;Q8CGP1;Q8CGP2;Q6ZWY9;P10854;Q8CGP0;Q64524	24;24;24;24;24;24;24	P10853;Q6ZWY9;Q8CGP0	P10853	Histone H2B type 1-F/J/L;Histone H2B type 1-K;Histone H2B type 1-P;Histone H2B type 1-C/E/G;Histone H2B type 1-M;Histone H2B type 3-B;Histone H2B type 2-E	Hist1h2bf;Hist1h2bk;Hist1h2bp;Hist1h2bc;Hist1h2bm;Hist3h2bb;Hist2h2be	PAPKKGSKKAVTKAQKKDGKKRKRGRKESYS;PAPKKGSKKAVTKAQKKDGKKRKRSRKESYS	46	UID194
	Craniofacial development protein 1	Cfdp1	2506600	0	1957900	0	0	0	3154600	0	0	0	0	292	K	DLRLSK(1)MK(1)P	2	371	___2	1	0.00490368	292	O88271	292	O88271	O88271	Craniofacial development protein 1	Cfdp1	VDHRQFEIERDLRLSKMKP____________	40	UID188
	Craniofacial development protein 1	Cfdp1	2506600	0	1957900	0	0	0	3154600	0	0	0	0	294	K	DLRLSK(1)MK(1)P	2	371	___2	1	0.00490368	294	O88271	294	O88271	O88271	Craniofacial development protein 1	Cfdp1	HRQFEIERDLRLSKMKP______________	41	UID189
	Arginine and glutamate-rich protein 1	Arglu1	81158000	61135000	0	0	0	59187000	26745000	0	30765000	0	0	195	K	EEEERAK(1)REELER	1	1203	___1	1	0.00638587	195	Q3UL36	195	Q3UL36	Q3UL36	Arginine and glutamate-rich protein 1	Arglu1	AELAAQKAREEEERAKREELERILEENNRKI	78	UID79
	Myomegalin	Pde4dip	114250000	53347000	67579000	89896000	145440000	191920000	105860000	40939000	86615000	130120000	80469000	2155	K	EGQLMEK(1)ELLDLR	1	1675	___1	1	0.00913736	2155	Q80YT7	2155	Q80YT7	Q80YT7	Myomegalin	Pde4dip	THGPVLVGKEGQLMEKELLDLRAQVSQQEQI	102	UID103
	Actin, cytoplasmic 1;Actin, cytoplasmic 1, N-terminally processed;Actin, cytoplasmic 2;Actin, cytoplasmic 2, N-terminally processed;Actin, alpha skeletal muscle;Actin, alpha cardiac muscle 1;Actin, gamma-enteric smooth muscle;Actin, aortic smooth muscle	Actb;Actg1;Acta1;Actc1;Actg2;Acta2	0	0	0	0	2410000	0	0	0	1941400	0	0	326;326;328;328;327;328	K	EITALAPSTMK(1)IK	1	844;952;962	___1	1	0.000631869	326	P60710;P63260;P68134;P68033;P63268;P62737	326;326;328;328;327;328	P60710;P63260;P68134	P60710	Actin, cytoplasmic 1;Actin, cytoplasmic 1, N-terminally processed;Actin, cytoplasmic 2;Actin, cytoplasmic 2, N-terminally processed;Actin, alpha skeletal muscle;Actin, alpha cardiac muscle 1;Actin, gamma-enteric smooth muscle;Actin, aortic smooth muscle	Actb;Actg1;Acta1;Actc1;Actg2;Acta2	DRMQKEITALAPSTMKIKIIAPPERKYSVWI	64	UID65
	Cyclin-dependent kinase 13	Cdk13	25233000	13345000	13601000	8141100	22488000	35672000	15268000	13843000	27639000	25351000	24266000	298	K	EPPK(0.999)AYREDK(0.001)SEPK	1	1453	___1	0.999435	0.0141869	298	Q69ZA1	298	Q69ZA1	Q69ZA1	Cyclin-dependent kinase 13	Cdk13	TKSSKEPPSAYKEPPKAYREDKSEPKAYRRR	95	UID96
	Histone H2B type 3-B;Histone H2B type 3-A;Histone H2B type 2-E	Hist3h2bb;Hist3h2ba;Hist2h2be	0	0	0	0	0	0	0	0	0	0	0	44;44;44	K	ESYSIYVYK(0.667)VLK(0.667)QVHPDTGISSK(0.667)AMGIMNSFVNDIFER		1942	___2	0.666667	0.00468104	44	Q8CGP0;Q9D2U9;Q64524	44;44;44	Q8CGP0	Q8CGP0	Histone H2B type 3-B;Histone H2B type 3-A;Histone H2B type 2-E	Hist3h2bb;Hist3h2ba;Hist2h2be	KRKRGRKESYSIYVYKVLKQVHPDTGISSKA	119	UID267
	Histone H2B type 1-F/J/L;Histone H2B type 1-K;Histone H2B type 1-P;Histone H2B type 1-B;Histone H2B type 2-B;Histone H2B type 1-C/E/G;Histone H2B type 1-M;Histone H2B type 1-H	Hist1h2bf;Hist1h2bk;Hist1h2bp;Hist1h2bb;Hist2h2bb;Hist1h2bc;Hist1h2bm;Hist1h2bh	6842500	46788000	18034000	4668500	0	0	0	0	0	0	0	44;44;44;44;44;44;44;44	K	ESYSVYVYK(1)VLK	1	1435;1441;1577;474	___1	1	0.0157034	44	P10853;Q8CGP1;Q8CGP2;Q64475;Q64525;Q6ZWY9;P10854;Q64478	44;44;44;44;44;44;44;44	P10853;Q64475;Q64525;Q6ZWY9	P10853	Histone H2B type 1-F/J/L;Histone H2B type 1-K;Histone H2B type 1-P;Histone H2B type 1-B;Histone H2B type 2-B;Histone H2B type 1-C/E/G;Histone H2B type 1-M;Histone H2B type 1-H	Hist1h2bf;Hist1h2bk;Hist1h2bp;Hist1h2bb;Hist2h2bb;Hist1h2bc;Hist1h2bm;Hist1h2bh	KRKRSRKESYSVYVYKVLKQVHPDTGISSKA	47	UID48
	60 kDa SS-A/Ro ribonucleoprotein	Trove2	0	0	0	0	0	0	0	0	0	0	0	78	K	GCEVIQEIK(1)SFSQEGRTAK		268	___1	1	0.0085557	78	O08848	78	O08848	O08848	60 kDa SS-A/Ro ribonucleoprotein	Trove2	RLIEDGRGCEVIQEIKSFSQEGRTAKQEPLL	39	UID40
	Transketolase	Tkt	70837000	45379000	0	0	0	28685000	8297800	49028000	31477000	0	8427400	254	K	GITGIEDK(0.667)EAWHGK(0.667)PLPK(0.667)NMAEQIIQEIYSQVQSK		681	___2	0.666667	0.00550366	254	P40142	254	P40142	P40142	Transketolase	Tkt	IAKTFKGRGITGIEDKEAWHGKPLPKNMAEQ	55	UID203
	Transketolase	Tkt	70837000	45379000	0	0	0	28685000	8297800	49028000	31477000	0	8427400	260	K	GITGIEDK(0.667)EAWHGK(0.667)PLPK(0.667)NMAEQIIQEIYSQVQSK		681	___2	0.666667	0.00550366	260	P40142	260	P40142	P40142	Transketolase	Tkt	GRGITGIEDKEAWHGKPLPKNMAEQIIQEIY	56	UID204
	Transketolase	Tkt	70837000	45379000	0	0	0	28685000	8297800	49028000	31477000	0	8427400	264	K	GITGIEDK(0.667)EAWHGK(0.667)PLPK(0.667)NMAEQIIQEIYSQVQSK		681	___2	0.666667	0.00550366	264	P40142	264	P40142	P40142	Transketolase	Tkt	TGIEDKEAWHGKPLPKNMAEQIIQEIYSQVQ	57	UID205
	Sperm-associated antigen 17	Spag17	3448200	0	3287100	1431500	1436900	3031500	0	0	0	1743100	0	164	K	GK(0.002)GK(0.943)SPK(0.055)EK	1	1263	___1	0.943117	0.0206053	164	Q5S003	164	Q5S003	Q5S003	Sperm-associated antigen 17	Spag17	MVEERTKSEKDKGKGKSPKEKKVASAKPGKG	82	UID83
	E3 ubiquitin-protein ligase TRIM21	Trim21	0	0	0	0	0	0	0	0	18486000	0	0	154	K	GK(1)ELAEK(1)MEMDLTMQR	2	1395	___2	1	0.000268474	154	Q62191	154	Q62191	Q62191	E3 ubiquitin-protein ligase TRIM21	Trim21	YQEKIHVVLEKLRKGKELAEKMEMDLTMQRT	86	UID234
	E3 ubiquitin-protein ligase TRIM21	Trim21	0	0	0	0	0	0	0	0	18486000	0	0	159	K	GK(1)ELAEK(1)MEMDLTMQR	2	1395	___2	1	0.000268474	159	Q62191	159	Q62191	Q62191	E3 ubiquitin-protein ligase TRIM21	Trim21	HVVLEKLRKGKELAEKMEMDLTMQRTDWKRN	87	UID235
H4K8ac	Histone H4	Hist1h4a	36454000	37524000	21556000	13003000	18171000	17507000	16932000	25577000	46944000	52323000	44552000	9	K	GK(1)GGK(1)GLGK(1)GGAK	2;3	910	___2	1	0.000240629	9	P62806	9	P62806	P62806	Histone H4	Hist1h4a	_______MSGRGKGGKGLGKGGAKRHRKVLR	65	UID213
H4K5ac	Histone H4	Hist1h4a	52941000	66458000	35446000	24087000	0	34862000	14977000	0	47335000	0	59596000	6	K	GK(1)GGK(1)GLGK(1)GGAK	2;3	910	___2	1	0.000240629	6	P62806	6	P62806	P62806	Histone H4	Hist1h4a	__________MSGRGKGGKGLGKGGAKRHRK	68	UID216
H4K8ac	Histone H4	Hist1h4a	40463000	48145000	27666000	26405000	29501000	20864000	10669000	51615000	108310000	61898000	58373000	9	K	GK(1)GGK(1)GLGK(1)GGAK	2;3	910	___3	1	0.000240629	9	P62806	9	P62806	P62806	Histone H4	Hist1h4a	_______MSGRGKGGKGLGKGGAKRHRKVLR	65	UID360
H4K5ac	Histone H4	Hist1h4a	9605200	9121800	0	5026900	4200300	3616400	3853700	14589000	16217000	10574000	8308200	6	K	GK(1)GGK(1)GLGK(1)GGAK	2;3	910	___3	1	0.000240629	6	P62806	6	P62806	P62806	Histone H4	Hist1h4a	__________MSGRGKGGKGLGKGGAKRHRK	68	UID363
	Histone H4	Hist1h4a	0	0	0	70779000	76818000	0	0	67350000	195390000	0	0	13	K	GLGK(1)GGAK(1)R	2;3	910	___1	1	0.000240629	13	P62806	13	P62806	P62806	Histone H4	Hist1h4a	___MSGRGKGGKGLGKGGAKRHRKVLRDNIQ	66	UID67
	Histone H4	Hist1h4a	36454000	37524000	21556000	13003000	18171000	17507000	16932000	25577000	46944000	52323000	44552000	13	K	GLGK(1)GGAK(1)R	2;3	910	___2	1	0.000240629	13	P62806	13	P62806	P62806	Histone H4	Hist1h4a	___MSGRGKGGKGLGKGGAKRHRKVLRDNIQ	66	UID214
H4K16ac	Histone H4	Hist1h4a	292390016	291920000	171900000	276089984	348040000	182250000	144890000	441390016	1072300032	812460032	712929984	17	K	GLGK(1)GGAK(1)R	2;3	910	___2	1	0.000667562	17	P62806	17	P62806	P62806	Histone H4	Hist1h4a	SGRGKGGKGLGKGGAKRHRKVLRDNIQGITK	67	UID215
H4K14ac	Histone H4	Hist1h4a	40463000	48145000	27666000	26405000	29501000	20864000	10669000	51615000	108310000	61898000	58373000	13	K	GLGK(1)GGAK(1)R	2;3	910	___3	1	0.000240629	13	P62806	13	P62806	P62806	Histone H4	Hist1h4a	___MSGRGKGGKGLGKGGAKRHRKVLRDNIQ	66	UID361
H4K16ac	Histone H4	Hist1h4a	40463000	48145000	27666000	26405000	29501000	20864000	10669000	51615000	108310000	61898000	58373000	17	K	GLGK(1)GGAK(1)R	2;3	910	___3	1	0.000667562	17	P62806	17	P62806	P62806	Histone H4	Hist1h4a	SGRGKGGKGLGKGGAKRHRKVLRDNIQGITK	67	UID362
	Histone H2B type 1-F/J/L;Histone H2B type 1-K;Histone H2B type 1-P;Histone H2B type 1-A;Histone H2B type 1-B;Histone H2B type 2-B;Histone H2B type 1-C/E/G;Histone H2B type 1-M;Histone H2B type 1-H;Histone H2B type 3-B;Histone H2B type 3-A;Histone H2B type 2-E	Hist1h2bf;Hist1h2bk;Hist1h2bp;Hist1h2ba;Hist1h2bb;Hist2h2bb;Hist1h2bc;Hist1h2bm;Hist1h2bh;Hist3h2bb;Hist3h2ba;Hist2h2be	1655100	11506000	10750000	1491000	2556300	1850700	1304100	676800	888240	651640	0	117;117;117;118;117;117;117;117;117;117;117;117	K	HAVSEGTK(1)AVTK	1	1435;1441;1577;1942;474	___1	1	7.91e-24	117	P10853;Q8CGP1;Q8CGP2;P70696;Q64475;Q64525;Q6ZWY9;P10854;Q64478;Q8CGP0;Q9D2U9;Q64524	117;117;117;118;117;117;117;117;117;117;117;117	P10853;Q64475;Q64525;Q6ZWY9;Q8CGP0	P10853	Histone H2B type 1-F/J/L;Histone H2B type 1-K;Histone H2B type 1-P;Histone H2B type 1-A;Histone H2B type 1-B;Histone H2B type 2-B;Histone H2B type 1-C/E/G;Histone H2B type 1-M;Histone H2B type 1-H;Histone H2B type 3-B;Histone H2B type 3-A;Histone H2B type 2-E	Hist1h2bf;Hist1h2bk;Hist1h2bp;Hist1h2ba;Hist1h2bb;Hist2h2bb;Hist1h2bc;Hist1h2bm;Hist1h2bh;Hist3h2bb;Hist3h2ba;Hist2h2be	LLPGELAKHAVSEGTKAVTKYTSSK______	51	UID52
	Pre-mRNA-processing factor 6	Prpf6	11652000	7475400	0	0	9965400	10605000	7832600	0	0	0	0	710	K	HYEDFPK(0.5)LWMMK(0.5)GQIEEQGELMEK	1	2208	___1	0.500004	0.0133578	710	Q91YR7	710	Q91YR7	Q91YR7	Pre-mRNA-processing factor 6	Prpf6	QELCEEALRHYEDFPKLWMMKGQIEEQGELM	129	UID130
	Pre-mRNA-processing factor 6	Prpf6	11652000	7475400	0	0	9965400	10605000	7832600	0	0	0	0	715	K	HYEDFPK(0.5)LWMMK(0.5)GQIEEQGELMEK	1	2208	___1	0.500049	0.0133578	715	Q91YR7	715	Q91YR7	Q91YR7	Pre-mRNA-processing factor 6	Prpf6	EALRHYEDFPKLWMMKGQIEEQGELMEKARE	130	UID131
	Calcium/calmodulin-dependent protein kinase II inhibitor 2	Camk2n2	0	0	0	0	0	0	0	0	0	0	0	69	K	IDDVLK(0.5)GMGEK(0.5)PPSGV	1	1586	___1	0.5	0.0171251	69	Q78WH7	69	Q78WH7	Q78WH7	Calcium/calmodulin-dependent protein kinase II inhibitor 2	Camk2n2	AKRVVIEDDRIDDVLKGMGEKPPSGV_____	97	UID98
	Calcium/calmodulin-dependent protein kinase II inhibitor 2	Camk2n2	0	0	0	0	0	0	0	0	0	0	0	74	K	IDDVLK(0.5)GMGEK(0.5)PPSGV	1	1586	___1	0.5	0.0171251	74	Q78WH7	74	Q78WH7	Q78WH7	Calcium/calmodulin-dependent protein kinase II inhibitor 2	Camk2n2	IEDDRIDDVLKGMGEKPPSGV__________	98	UID99
	CAP-Gly domain-containing linker protein 2	Clip2	0	0	0	0	0	0	9552600	0	0	0	0	873	K	IDSLLK(1)EK	1	2987	___1	1	0.0163292	873	Q9Z0H8	873	Q9Z0H8	Q9Z0H8	CAP-Gly domain-containing linker protein 2	Clip2	ENKCKSGEKKIDSLLKEKRRLEAELEAVSRK	145	UID146
H2BK16ac	Histone H2B type 1-B	Hist1h2bb	0	0	0	0	0	1280700	0	1516100	0	826620	0	17	K	K(1)AISK(1)AQK	2	1435	___2	1	0.0156847	17	Q64475	17	Q64475	Q64475	Histone H2B type 1-B	Hist1h2bb	PEPSKSAPAPKKGSKKAISKAQKKDGKKRKR	88	UID236
H2BK20ac	Histone H2B type 1-B	Hist1h2bb	0	0	0	0	0	1280700	0	1516100	0	826620	0	21	K	K(1)AISK(1)AQK	2	1435	___2	1	0.0156847	21	Q64475	21	Q64475	Q64475	Histone H2B type 1-B	Hist1h2bb	KSAPAPKKGSKKAISKAQKKDGKKRKRSRKE	89	UID237
H2BK20ac	Histone H2B type 1-F/J/L;Histone H2B type 1-K;Histone H2B type 1-P;Histone H2B type 1-C/E/G;Histone H2B type 1-M;Histone H2B type 3-B;Histone H2B type 2-E	Hist1h2bf;Hist1h2bk;Hist1h2bp;Hist1h2bc;Hist1h2bm;Hist3h2bb;Hist2h2be	14087000	13662000	11203000	7901900	17770000	20703000	4109800	16287000	0	20241000	0	21;21;21;21;21;21;21	K	K(1)AVTK(1)AQK	2;3	1577;1942;474	___2	1	2.4e-12	21	P10853;Q8CGP1;Q8CGP2;Q6ZWY9;P10854;Q8CGP0;Q64524	21;21;21;21;21;21;21	P10853;Q6ZWY9;Q8CGP0	P10853	Histone H2B type 1-F/J/L;Histone H2B type 1-K;Histone H2B type 1-P;Histone H2B type 1-C/E/G;Histone H2B type 1-M;Histone H2B type 3-B;Histone H2B type 2-E	Hist1h2bf;Hist1h2bk;Hist1h2bp;Hist1h2bc;Hist1h2bm;Hist3h2bb;Hist2h2be	KSAPAPKKGSKKAVTKAQKKDGKKRKRGRKE;KSAPAPKKGSKKAVTKAQKKDGKKRKRSRKE	45	UID193
H2BK20ac	Histone H2B type 1-F/J/L;Histone H2B type 1-K;Histone H2B type 1-P;Histone H2B type 1-C/E/G;Histone H2B type 1-M;Histone H2B type 3-B;Histone H2B type 2-E	Hist1h2bf;Hist1h2bk;Hist1h2bp;Hist1h2bc;Hist1h2bm;Hist3h2bb;Hist2h2be	0	0	1313400	0	1797700	1232500	1843700	0	2203700	0	1192500	21;21;21;21;21;21;21	K	K(1)AVTK(1)AQK	2;3	1577;1942;474	___3	1	2.4e-12	21	P10853;Q8CGP1;Q8CGP2;Q6ZWY9;P10854;Q8CGP0;Q64524	21;21;21;21;21;21;21	P10853;Q6ZWY9;Q8CGP0	P10853	Histone H2B type 1-F/J/L;Histone H2B type 1-K;Histone H2B type 1-P;Histone H2B type 1-C/E/G;Histone H2B type 1-M;Histone H2B type 3-B;Histone H2B type 2-E	Hist1h2bf;Hist1h2bk;Hist1h2bp;Hist1h2bc;Hist1h2bm;Hist3h2bb;Hist2h2be	KSAPAPKKGSKKAVTKAQKKDGKKRKRGRKE;KSAPAPKKGSKKAVTKAQKKDGKKRKRSRKE	45	UID340
H2BK16ac	Histone H2B type 1-F/J/L;Histone H2B type 1-K;Histone H2B type 1-P;Histone H2B type 1-C/E/G;Histone H2B type 1-M;Histone H2B type 3-B;Histone H2B type 2-E	Hist1h2bf;Hist1h2bk;Hist1h2bp;Hist1h2bc;Hist1h2bm;Hist3h2bb;Hist2h2be	14087000	13662000	11203000	7901900	17770000	20703000	4109800	16287000	0	20241000	0	17;17;17;17;17;17;17	K	K(1)GSK(1)K(1)AVTK	2;3	1577;1942;474	___2	1	2.4e-12	17	P10853;Q8CGP1;Q8CGP2;Q6ZWY9;P10854;Q8CGP0;Q64524	17;17;17;17;17;17;17	P10853;Q6ZWY9;Q8CGP0	P10853	Histone H2B type 1-F/J/L;Histone H2B type 1-K;Histone H2B type 1-P;Histone H2B type 1-C/E/G;Histone H2B type 1-M;Histone H2B type 3-B;Histone H2B type 2-E	Hist1h2bf;Hist1h2bk;Hist1h2bp;Hist1h2bc;Hist1h2bm;Hist3h2bb;Hist2h2be	PDPSKSAPAPKKGSKKAVTKAQKKDGKKRKR;PEPAKSAPAPKKGSKKAVTKAQKKDGKKRKR	50	UID198
H2BK16ac	Histone H2B type 2-B	Hist2h2bb	4500100	3111800	2807200	1578000	0	0	1102400	3141900	0	0	0	17	K	K(1)GSK(1)K(1)AVTK	2;3	1441	___2	1	0.00171354	17	Q64525	17	Q64525	Q64525	Histone H2B type 2-B	Hist2h2bb	PDPAKSAPAPKKGSKKAVTKVQKKDGKKRKR	91	UID239
	Histone H2B type 1-F/J/L;Histone H2B type 1-K;Histone H2B type 1-P;Histone H2B type 1-C/E/G;Histone H2B type 1-M;Histone H2B type 3-B;Histone H2B type 2-E	Hist1h2bf;Hist1h2bk;Hist1h2bp;Hist1h2bc;Hist1h2bm;Hist3h2bb;Hist2h2be	0	0	1313400	0	1797700	1232500	1843700	0	2203700	0	1192500	16;16;16;16;16;16;16	K	K(1)GSK(1)K(1)AVTK	3	1577;1942;474	___3	1	0.00087413	16	P10853;Q8CGP1;Q8CGP2;Q6ZWY9;P10854;Q8CGP0;Q64524	16;16;16;16;16;16;16	P10853;Q6ZWY9;Q8CGP0	P10853	Histone H2B type 1-F/J/L;Histone H2B type 1-K;Histone H2B type 1-P;Histone H2B type 1-C/E/G;Histone H2B type 1-M;Histone H2B type 3-B;Histone H2B type 2-E	Hist1h2bf;Hist1h2bk;Hist1h2bp;Hist1h2bc;Hist1h2bm;Hist3h2bb;Hist2h2be	MPDPSKSAPAPKKGSKKAVTKAQKKDGKKRK;MPEPAKSAPAPKKGSKKAVTKAQKKDGKKRK	49	UID344
H2BK16ac	Histone H2B type 1-F/J/L;Histone H2B type 1-K;Histone H2B type 1-P;Histone H2B type 1-C/E/G;Histone H2B type 1-M;Histone H2B type 3-B;Histone H2B type 2-E	Hist1h2bf;Hist1h2bk;Hist1h2bp;Hist1h2bc;Hist1h2bm;Hist3h2bb;Hist2h2be	0	0	1313400	0	1797700	1232500	1843700	0	2203700	0	1192500	17;17;17;17;17;17;17	K	K(1)GSK(1)K(1)AVTK	2;3	1577;1942;474	___3	1	2.4e-12	17	P10853;Q8CGP1;Q8CGP2;Q6ZWY9;P10854;Q8CGP0;Q64524	17;17;17;17;17;17;17	P10853;Q6ZWY9;Q8CGP0	P10853	Histone H2B type 1-F/J/L;Histone H2B type 1-K;Histone H2B type 1-P;Histone H2B type 1-C/E/G;Histone H2B type 1-M;Histone H2B type 3-B;Histone H2B type 2-E	Hist1h2bf;Hist1h2bk;Hist1h2bp;Hist1h2bc;Hist1h2bm;Hist3h2bb;Hist2h2be	PDPSKSAPAPKKGSKKAVTKAQKKDGKKRKR;PEPAKSAPAPKKGSKKAVTKAQKKDGKKRKR	50	UID345
	Histone H2B type 1-F/J/L;Histone H2B type 1-K;Histone H2B type 1-P;Histone H2B type 2-B;Histone H2B type 1-C/E/G;Histone H2B type 1-M;Histone H2B type 3-B;Histone H2B type 2-E	Hist1h2bf;Hist1h2bk;Hist1h2bp;Hist2h2bb;Hist1h2bc;Hist1h2bm;Hist3h2bb;Hist2h2be	0	3370200	0	0	1923300	2871800	0	3047400	0	1875500	2183300	13;13;13;13;13;13;13;13	K	K(1)GSK(1)K(1)AVTK	3	1441;1577;1942;474	___3	1	0.00171354	13	P10853;Q8CGP1;Q8CGP2;Q64525;Q6ZWY9;P10854;Q8CGP0;Q64524	13;13;13;13;13;13;13;13	P10853;Q64525;Q6ZWY9;Q8CGP0	P10853	Histone H2B type 1-F/J/L;Histone H2B type 1-K;Histone H2B type 1-P;Histone H2B type 2-B;Histone H2B type 1-C/E/G;Histone H2B type 1-M;Histone H2B type 3-B;Histone H2B type 2-E	Hist1h2bf;Hist1h2bk;Hist1h2bp;Hist2h2bb;Hist1h2bc;Hist1h2bm;Hist3h2bb;Hist2h2be	___MPDPAKSAPAPKKGSKKAVTKVQKKDGK;___MPDPSKSAPAPKKGSKKAVTKAQKKDGK;___MPEPAKSAPAPKKGSKKAVTKAQKKDGK	53	UID348
H2BK16ac	Histone H2B type 2-B	Hist2h2bb	0	3370200	0	0	1923300	2871800	0	3047400	0	1875500	2183300	17	K	K(1)GSK(1)K(1)AVTK	2;3	1441	___3	1	0.00171354	17	Q64525	17	Q64525	Q64525	Histone H2B type 2-B	Hist2h2bb	PDPAKSAPAPKKGSKKAVTKVQKKDGKKRKR	91	UID386
	Histone H2B type 2-B	Hist2h2bb	0	3370200	0	0	1923300	2871800	0	3047400	0	1875500	2183300	16	K	K(1)GSK(1)K(1)AVTK	3	1441	___3	1	0.00171354	16	Q64525	16	Q64525	Q64525	Histone H2B type 2-B	Hist2h2bb	MPDPAKSAPAPKKGSKKAVTKVQKKDGKKRK	92	UID387
	Transcription factor SOX-3	Sox3	33981000	44018000	8729300	1548100	44212000	5291600	37141000	1569000	4618100	0	4348800	101	K	K(1)MALENPK(0.318)MHNSEISK(0.682)R	2	782	___2	0.682108	0.0182861	101	P53784	101	P53784	P53784	Transcription factor SOX-3	Sox3	KMALENPKMHNSEISKRLGADWKLLTDAEKR	62	UID210
	Transcription factor SOX-3	Sox3	33981000	44018000	8729300	1548100	44212000	5291600	37141000	1569000	4618100	0	4348800	86	K	K(1)MALENPK(0.5)MHNSEISK(0.5)R	2	782	___2	0.999938	0.0182861	86	P53784	86	P53784	P53784	Transcription factor SOX-3	Sox3	RPMNAFMVWSRGQRRKMALENPKMHNSEISK	61	UID209
	Histone H3.1;Histone H3.2;Histone H3.3	Hist1h3a;Hist1h3b;H3f3a	112040000	159970000	98667000	85828000	88226000	95555000	75326000	149860000	318660000	157500000	169210000	19;19;19	K	K(1)QLATK(1)AAR	2	1025;1026;970	___2	1	4.09e-07	19	P68433;P84228;P84244	19;19;19	P68433;P84228;P84244	P84228	Histone H3.1;Histone H3.2;Histone H3.3	Hist1h3a;Hist1h3b;H3f3a	TKQTARKSTGGKAPRKQLATKAARKSAPATG;TKQTARKSTGGKAPRKQLATKAARKSAPSTG	70	UID218
H3K27ac	Histone H3.1;Histone H3.2	Hist1h3a;Hist1h3b	87659000	79930000	67187000	38429000	64800000	62623000	43125000	65060000	169500000	135220000	147230000	28;28	K	K(1)SAPATGGVK	1	1025;970	___1	1	2.75e-05	28	P68433;P84228	28;28	P68433;P84228	P84228	Histone H3.1;Histone H3.2	Hist1h3a;Hist1h3b	GGKAPRKQLATKAARKSAPATGGVKKPHRYR	72	UID73
	Histone H1.1	Hist1h1a	25941000	49844000	29659000	25923000	35568000	46088000	20115000	16644000	12722000	16013000	21906000	66	K	K(1)SLAAAGYDVEK	1	696	___1	1	5.06e-05	66	P43275	66	P43275	P43275	Histone H1.1	Hist1h1a	SSSKERSGVSLAALKKSLAAAGYDVEKNNSR	58	UID59
H3K9/14ac	Histone H3.1;Histone H3.2;Histone H3.3;Histone H3.3C	Hist1h3a;Hist1h3b;H3f3a;H3f3c	31286000	25027000	17478000	12693000	16521000	25657000	7767200	30724000	65148000	42539000	31759000	10;10;10;10	K	K(1)STGGK(1)APR	2	1025;1026;970	___2	1	0.0109307	10	P68433;P84228;P84244;P02301	10;10;10;10	P68433;P84228;P84244	P84228	Histone H3.1;Histone H3.2;Histone H3.3;Histone H3.3C	Hist1h3a;Hist1h3b;H3f3a;H3f3c	______MARTKQTARKSTGGKAPRKQLATKA	73	UID221
H3K9/14ac	Histone H3.1;Histone H3.2;Histone H3.3;Histone H3.3C	Hist1h3a;Hist1h3b;H3f3a;H3f3c	31286000	25027000	17478000	12693000	16521000	25657000	7767200	30724000	65148000	42539000	31759000	15;15;15;15	K	K(1)STGGK(1)APR	2	1025;1026;970	___2	1	0.0109307	15	P68433;P84228;P84244;P02301	15;15;15;15	P68433;P84228;P84244	P84228	Histone H3.1;Histone H3.2;Histone H3.3;Histone H3.3C	Hist1h3a;Hist1h3b;H3f3a;H3f3c	_MARTKQTARKSTGGKAPRKQLATKAARKSA	74	UID222
	GREB1-like protein	Greb1l	0	0	0	0	0	0	0	0	0	0	0	759	K	LDNEIQSK(1)FEVFMRR	1	64	___1	1	0.0145593	759	B9EJV3	759	B9EJV3	B9EJV3	GREB1-like protein	Greb1l	RAERYVVRLDNEIQSKFEVFMRRVKQNPYTL	4	UID5
	Aldehyde oxidase 2	Aox2	0	0	0	2845600	0	4825400	2974100	0	0	0	0	1121	K	LEPVIK(1)K	1	1265	___1	1	0.0140297	1121	Q5SGK3	1121	Q5SGK3	Q5SGK3	Aldehyde oxidase 2	Aox2	QNACQILLKRLEPVIKKNPEGTWRDWIEAAF	83	UID84
	Citron Rho-interacting kinase	Cit	0	0	0	0	0	0	0	0	0	0	0	1167	K	LNDLEK(0.5)K(0.5)HAMLEMNAR	1	740	___1	0.5	0.000274958	1167	P49025	1167	P49025	P49025	Citron Rho-interacting kinase	Cit	KLKAESLSDKLNDLEKKHAMLEMNARSLQQK	59	UID60
	Citron Rho-interacting kinase	Cit	0	0	0	0	0	0	0	0	0	0	0	1168	K	LNDLEK(0.5)K(0.5)HAMLEMNAR	1	740	___1	0.5	0.000274958	1168	P49025	1168	P49025	P49025	Citron Rho-interacting kinase	Cit	LKAESLSDKLNDLEKKHAMLEMNARSLQQKL	60	UID61
	Serine/threonine-protein kinase SIK2	Sik2	0	19557000	12783000	18198000	23799000	20339000	18316000	0	18666000	0	10547000	686	K	LQK(1)PNLLPK	1	1926	___1	1	0.00332303	686	Q8CFH6	686	Q8CFH6	Q8CFH6	Serine/threonine-protein kinase SIK2	Sik2	PQQSLETQYLQHRLQKPNLLPKAQSPCPVYC	118	UID119
	Germ cell-specific gene 1 protein	Gsg1	17199000	19114000	9999200	17706000	26004000	37614000	4038300	20110000	0	0	15021000	3	K	MAK(1)MEFQK(1)GSSDQR	2	2075	___2	1	0.0012219	3	Q8R1W2	3	Q8R1W2	Q8R1W2	Germ cell-specific gene 1 protein	Gsg1	_____________MAKMEFQKGSSDQRTFIS	125	UID273
	Germ cell-specific gene 1 protein	Gsg1	17199000	19114000	9999200	17706000	26004000	37614000	4038300	20110000	0	0	15021000	8	K	MAK(1)MEFQK(1)GSSDQR	2	2075	___2	1	0.0012219	8	Q8R1W2	8	Q8R1W2	Q8R1W2	Germ cell-specific gene 1 protein	Gsg1	________MAKMEFQKGSSDQRTFISAILNM	126	UID274
	Serine/threonine-protein kinase VRK2	Vrk2	0	0	0	0	0	0	0	0	0	0	18405000	6	K	MAPRRK(1)EK	1	1780	___1	1	0.0212863	6	Q8BN21	6	Q8BN21	Q8BN21	Serine/threonine-protein kinase VRK2	Vrk2	__________MAPRRKEKYKLPVPLPEGKIL	109	UID110
	Olfactory receptor	Olfr427	0	0	0	0	0	0	1216500	0	0	0	0	3	K	MDK(0.5)K(0.5)NQTK		211	___1	0.5	0.019917	3	E9Q7E7	3	E9Q7E7	E9Q7E7	Olfactory receptor	Olfr427	_____________MDKKNQTKVTEFYFSDFP	36	UID37
	Olfactory receptor	Olfr427	0	0	0	0	0	0	1216500	0	0	0	0	4	K	MDK(0.5)K(0.5)NQTK		211	___1	0.5	0.019917	4	E9Q7E7	4	E9Q7E7	E9Q7E7	Olfactory receptor	Olfr427	____________MDKKNQTKVTEFYFSDFPQ	37	UID38
		1700101E01Rik	0	0	0	0	0	0	0	0	0	0	0	209	K	MEKKQK(1)VILGK		3	___1	0.999527	0.0196207	209	A0A087WRI3	209	A0A087WRI3	A0A087WRI3		1700101E01Rik	EQKATQQAIKMEKKQKVILGKLYETRSSQLR	0	UID1
	CAP-Gly domain-containing linker protein 1	Clip1	0	0	0	0	14682000	0	0	0	0	0	0	1010	K	MLADTEDK(0.5)LK(0.5)AAQEANR	1	2247	___1	0.5	0.00939433	1010	Q922J3	1010	Q922J3	Q922J3	CAP-Gly domain-containing linker protein 1	Clip1	EILQNLQKMLADTEDKLKAAQEANRDLMQDM	133	UID134
	CAP-Gly domain-containing linker protein 1	Clip1	0	0	0	0	14682000	0	0	0	0	0	0	1012	K	MLADTEDK(0.5)LK(0.5)AAQEANR	1	2247	___1	0.5	0.00939433	1012	Q922J3	1012	Q922J3	Q922J3	CAP-Gly domain-containing linker protein 1	Clip1	LQNLQKMLADTEDKLKAAQEANRDLMQDMEE	134	UID135
		Nuggc	38776000	25315000	20590000	25331000	26679000	28471000	17503000	29655000	36080000	39332000	31680000	759	K	NEQK(0.002)EMEK(0.998)LYRSLR	1	158	___1	0.998141	0.0205519	759	D3YWJ0	759	D3YWJ0	D3YWJ0		Nuggc	CKELADVRNEQKEMEKLYRSLREVAENAQLR	31	UID32
	PAB-dependent poly(A)-specific ribonuclease subunit PAN2	Pan2	61557000	26960000	0	29011000	45993000	37267000	0	33411000	0	34894000	32295000	1172	K	NGTEPESFHK(0.283)VLK(0.283)GLYEK(0.434)GR		1712	___1	0.434386	0.010242	1172	Q8BGF7	1172	Q8BGF7	Q8BGF7	PAB-dependent poly(A)-specific ribonuclease subunit PAN2	Pan2	TEPESFHKVLKGLYEKGRKMDWKVPEPESQT	108	UID109
	A disintegrin and metalloproteinase with thrombospondin motifs 19	Adamts19	12345000	12546000	13021000	20080000	18345000	12354000	12351000	7426300	23023000	12260000	16060000	959	K	NISLVDNK(1)K	1	837	___1	1	0.00332436	959	P59509	959	P59509	P59509	A disintegrin and metalloproteinase with thrombospondin motifs 19	Adamts19	SCTKIMSKNISLVDNKKCKDLTKPEPQIRKC	63	UID64
H2BK5ac	Histone H2B type 3-B	Hist3h2bb	21473000	22317000	16467000	10260000	18650000	28060000	14809000	12147000	12135000	10038000	0	6	K	PDPSK(1)SAPAPK	1	1942	___1	1	0.00983543	6	Q8CGP0	6	Q8CGP0	Q8CGP0	Histone H2B type 3-B	Hist3h2bb	__________MPDPSKSAPAPKKGSKKAVTK	122	UID123
H2BK5ac	Histone H2B type 1-B	Hist1h2bb	161850000	119550000	157270000	89677000	154930000	183030000	122240000	107610000	123540000	104910000	99711000	6	K	PEPSK(1)SAPAPK	1	1435	___1	1	0.00302123	6	Q64475	6	Q64475	Q64475	Histone H2B type 1-B	Hist1h2bb	__________MPEPSKSAPAPKKGSKKAISK	90	UID91
	Phosphatidylinositol-glycan biosynthesis class X protein	Pigx	35516000	22997000	18580000	0	17743000	23965000	0	19575000	0	0	0	153	K	PHK(0.5)K(0.5)DGDTLIVVNNPDLLMYCDQEFPILK	1	2343	___1	0.5	0.0067884	153	Q99LV7	153	Q99LV7	Q99LV7	Phosphatidylinositol-glycan biosynthesis class X protein	Pigx	FQAFLPVHYRYHRPHKKDGDTLIVVNNPDLL	135	UID136
	Phosphatidylinositol-glycan biosynthesis class X protein	Pigx	35516000	22997000	18580000	0	17743000	23965000	0	19575000	0	0	0	154	K	PHK(0.5)K(0.5)DGDTLIVVNNPDLLMYCDQEFPILK	1	2343	___1	0.5	0.0067884	154	Q99LV7	154	Q99LV7	Q99LV7	Phosphatidylinositol-glycan biosynthesis class X protein	Pigx	QAFLPVHYRYHRPHKKDGDTLIVVNNPDLLM	136	UID137
		Gm15800	0	484820000	387960000	807840000	881680000	571939968	430340000	847550016	0	580000000	732470016	3809	K	PK(0.004)SPEK(0.344)SK(0.652)PDEK	1	189	___1	0.651863	0.00262837	3809	E9Q2E4	3809	E9Q2E4	E9Q2E4		Gm15800	SEKKPTVKPKSPEKSKPDEKDPEKSPTKKQE	33	UID34
		Gm15800	0	0	0	25558000	0	3959800	0	0	0	0	0	3807	K	PKSPEK(0.5)SK(0.5)PDEK	1	189	___1	0.499936	0.00262837	3807	E9Q2E4	3807	E9Q2E4	E9Q2E4		Gm15800	ALSEKKPTVKPKSPEKSKPDEKDPEKSPTKK	32	UID33
	Ubiquitin-like modifier-activating enzyme 5	Uba5	27245000	23453000	10789000	10139000	29123000	18020000	6210500	10187000	30086000	16098000	0	304	K	PNPQCDDK(0.793)NCRK(0.207)QQEEYK	1	2132	___1	0.793218	0.0201788	304	Q8VE47	304	Q8VE47	Q8VE47	Ubiquitin-like modifier-activating enzyme 5	Uba5	FFPTMFMKPNPQCDDKNCRKQQEEYKKRAAA	127	UID128
	Bromodomain-containing protein 7	Brd7	94456000	56747000	0	66043000	98138000	0	0	0	0	0	0	78	K	QAPGEEK(1)GRK(1)R	2	394	___2	1	0.00302892	78	O88665	78	O88665	O88665	Bromodomain-containing protein 7	Brd7	RKKRKKGEKQAPGEEKGRKRRRVKEDKKKRD	42	UID190
	Bromodomain-containing protein 7	Brd7	94456000	56747000	0	66043000	98138000	0	0	0	0	0	0	81	K	QAPGEEK(1)GRK(1)R	2	394	___2	1	0.00302892	81	O88665	81	O88665	O88665	Bromodomain-containing protein 7	Brd7	RKKGEKQAPGEEKGRKRRRVKEDKKKRDRDR	43	UID191
	Histone H3.1;Histone H3.2;Histone H3.3	Hist1h3a;Hist1h3b;H3f3a	1529400064	2240900096	1406599936	2473799936	3014599936	2253299968	1608600064	2261700096	4159099904	3634599936	3080100096	24;24;24	K	QLATK(1)AAR	1;2	1025;1026;970	___1	1	4.09e-07	24	P68433;P84228;P84244	24;24;24	P68433;P84228;P84244	P84228	Histone H3.1;Histone H3.2;Histone H3.3	Hist1h3a;Hist1h3b;H3f3a	RKSTGGKAPRKQLATKAARKSAPATGGVKKP;RKSTGGKAPRKQLATKAARKSAPSTGGVKKP	71	UID72
	Histone H3.1;Histone H3.2;Histone H3.3	Hist1h3a;Hist1h3b;H3f3a	112040000	159970000	98667000	85828000	88226000	95555000	75326000	149860000	318660000	157500000	169210000	24;24;24	K	QLATK(1)AAR	1;2	1025;1026;970	___2	1	4.09e-07	24	P68433;P84228;P84244	24;24;24	P68433;P84228;P84244	P84228	Histone H3.1;Histone H3.2;Histone H3.3	Hist1h3a;Hist1h3b;H3f3a	RKSTGGKAPRKQLATKAARKSAPATGGVKKP;RKSTGGKAPRKQLATKAARKSAPSTGGVKKP	71	UID219
	Histone H2B type 1-F/J/L;Histone H2B type 1-K;Histone H2B type 1-P;Histone H2B type 1-A;Histone H2B type 1-B;Histone H2B type 2-B;Histone H2B type 1-C/E/G;Histone H2B type 1-M;Histone H2B type 1-H	Hist1h2bf;Hist1h2bk;Hist1h2bp;Hist1h2ba;Hist1h2bb;Hist2h2bb;Hist1h2bc;Hist1h2bm;Hist1h2bh	45994000	48135000	21321000	21348000	54098000	42892000	0	18419000	32567000	10549000	18483000	58;58;58;59;58;58;58;58;58	K	QVHPDTGISSK(1)AMGIMNSFVNDIFER	1	1435;1441;1577;474	___1	1	1.33e-22	58	P10853;Q8CGP1;Q8CGP2;P70696;Q64475;Q64525;Q6ZWY9;P10854;Q64478	58;58;58;59;58;58;58;58;58	P10853;Q64475;Q64525;Q6ZWY9	P10853	Histone H2B type 1-F/J/L;Histone H2B type 1-K;Histone H2B type 1-P;Histone H2B type 1-A;Histone H2B type 1-B;Histone H2B type 2-B;Histone H2B type 1-C/E/G;Histone H2B type 1-M;Histone H2B type 1-H	Hist1h2bf;Hist1h2bk;Hist1h2bp;Hist1h2ba;Hist1h2bb;Hist2h2bb;Hist1h2bc;Hist1h2bm;Hist1h2bh	YKVLKQVHPDTGISSKAMGIMNSFVNDIFER	54	UID55
	Histone H2B type 3-B;Histone H2B type 3-A;Histone H2B type 2-E	Hist3h2bb;Hist3h2ba;Hist2h2be	45994000	48135000	21321000	21348000	54098000	42892000	0	18419000	32567000	10549000	18483000	58;58;58	K	QVHPDTGISSK(1)AMGIMNSFVNDIFER	1	1942	___1	1	1.33e-22	58	Q8CGP0;Q9D2U9;Q64524	58;58;58	Q8CGP0	Q8CGP0	Histone H2B type 3-B;Histone H2B type 3-A;Histone H2B type 2-E	Hist3h2bb;Hist3h2ba;Hist2h2be	YKVLKQVHPDTGISSKAMGIMNSFVNDIFER	121	UID122
	Histone H2B type 3-B;Histone H2B type 3-A;Histone H2B type 2-E	Hist3h2bb;Hist3h2ba;Hist2h2be	0	0	0	0	0	0	0	0	0	0	0	58;58;58	K	QVHPDTGISSK(1)AMGIMNSFVNDIFER	1	1942	___2	1	1.33e-22	58	Q8CGP0;Q9D2U9;Q64524	58;58;58	Q8CGP0	Q8CGP0	Histone H2B type 3-B;Histone H2B type 3-A;Histone H2B type 2-E	Hist3h2bb;Hist3h2ba;Hist2h2be	YKVLKQVHPDTGISSKAMGIMNSFVNDIFER	121	UID269
	Histone H2B type 1-F/J/L;Histone H2B type 1-K;Histone H2B type 1-P;Histone H2B type 1-B;Histone H2B type 2-B;Histone H2B type 1-C/E/G;Histone H2B type 1-M;Histone H2B type 1-H	Hist1h2bf;Hist1h2bk;Hist1h2bp;Hist1h2bb;Hist2h2bb;Hist1h2bc;Hist1h2bm;Hist1h2bh	0	5307400	2701500	0	15646000	3990600	2933400	0	7943500	5183100	4555700	35;35;35;35;35;35;35;35	K	RSRK(1)ESYSVYVYK	1	1435;1441;1577;474	___1	1	0.00114334	35	P10853;Q8CGP1;Q8CGP2;Q64475;Q64525;Q6ZWY9;P10854;Q64478	35;35;35;35;35;35;35;35	P10853;Q64475;Q64525;Q6ZWY9	P10853	Histone H2B type 1-F/J/L;Histone H2B type 1-K;Histone H2B type 1-P;Histone H2B type 1-B;Histone H2B type 2-B;Histone H2B type 1-C/E/G;Histone H2B type 1-M;Histone H2B type 1-H	Hist1h2bf;Hist1h2bk;Hist1h2bp;Hist1h2bb;Hist2h2bb;Hist1h2bc;Hist1h2bm;Hist1h2bh	SKAQKKDGKKRKRSRKESYSVYVYKVLKQVH;TKAQKKDGKKRKRSRKESYSVYVYKVLKQVH;TKVQKKDGKKRKRSRKESYSVYVYKVLKQVH	52	UID53
	E3 ubiquitin-protein ligase MARCH11	2011-03-01	70264000	88357000	67506000	20980000	123810000	36767000	62597000	16383000	0	30528000	43111000	6	K	SDEGK(0.983)K(0.017)R	1	1907	___1	0.983471	3.85e-06	6	Q8CBH7	6	Q8CBH7	Q8CBH7	E3 ubiquitin-protein ligase MARCH11	2011-03-01	__________MSDEGKKRSSRADSLEAEPPL	117	UID118
		Xlr5c	4336900	0	2514500	2828300	0	0	0	3317700	3096100	0	1565700	7	K	SNK(0.152)EQK(0.848)DMK	1	2826	___1	0.847824	0.0174865	7	Q9JJR2	7	Q9JJR2	Q9JJR2		Xlr5c	_________MSNKEQKDMKKSGKHQRVHKTL	141	UID142
	Zinc finger protein 322	Znf322	0	12491000	0	0	0	0	0	115590000	48220000	0	0	107	K	TFIQSSDLISHQRIHNYEK(1)PYK		1851	___1	1	0.00881545	107	Q8BZ89	107	Q8BZ89	Q8BZ89	Zinc finger protein 322	Znf322	QSSDLISHQRIHNYEKPYKCSKCEKSFWHHL	113	UID114
		Try10	3872200	0	3514000	0	0	0	0	0	0	0	0	112	K	TLDNDIMLIK(1)LSSPVTLNAR	1	1590	___1	1	0.0029537	112	Q792Z1	112	Q792Z1	Q792Z1		Try10	PKFKKKTLDNDIMLIKLSSPVTLNARVATVA	99	UID100
	Microtubule-associated protein 1A;MAP1A heavy chain;MAP1 light chain LC2	Map1a	0	0	0	0	4139400	0	0	0	0	0	0	1402	K	TSEQK(0.003)GRDLDK(0.997)K	1	2899	___1	0.996597	0.00559311	1402	Q9QYR6	1402	Q9QYR6	Q9QYR6	Microtubule-associated protein 1A;MAP1A heavy chain;MAP1 light chain LC2	Map1a	GQQDKTSEQKGRDLDKKDTAVELGKGPEPKG	143	UID144
	Histone H2B type 1-F/J/L;Histone H2B type 1-K;Histone H2B type 1-P;Histone H2B type 1-A;Histone H2B type 1-B;Histone H2B type 2-B;Histone H2B type 1-C/E/G;Histone H2B type 1-M;Histone H2B type 1-H	Hist1h2bf;Hist1h2bk;Hist1h2bp;Hist1h2ba;Hist1h2bb;Hist2h2bb;Hist1h2bc;Hist1h2bm;Hist1h2bh	0	4890500	3275600	0	0	0	0	0	0	0	0	47;47;47;48;47;47;47;47;47	K	VLK(1)QVHPDTGISSK	1	1435;1441;1577;474	___1	1	4.71e-05	47	P10853;Q8CGP1;Q8CGP2;P70696;Q64475;Q64525;Q6ZWY9;P10854;Q64478	47;47;47;48;47;47;47;47;47	P10853;Q64475;Q64525;Q6ZWY9	P10853	Histone H2B type 1-F/J/L;Histone H2B type 1-K;Histone H2B type 1-P;Histone H2B type 1-A;Histone H2B type 1-B;Histone H2B type 2-B;Histone H2B type 1-C/E/G;Histone H2B type 1-M;Histone H2B type 1-H	Hist1h2bf;Hist1h2bk;Hist1h2bp;Hist1h2ba;Hist1h2bb;Hist2h2bb;Hist1h2bc;Hist1h2bm;Hist1h2bh	RSRKESYSVYVYKVLKQVHPDTGISSKAMGI	48	UID49
	Histone H2B type 3-B;Histone H2B type 3-A;Histone H2B type 2-E	Hist3h2bb;Hist3h2ba;Hist2h2be	0	4890500	3275600	0	0	0	0	0	0	0	0	47;47;47	K	VLK(1)QVHPDTGISSK	1	1942	___1	1	4.71e-05	47	Q8CGP0;Q9D2U9;Q64524	47;47;47	Q8CGP0	Q8CGP0	Histone H2B type 3-B;Histone H2B type 3-A;Histone H2B type 2-E	Hist3h2bb;Hist3h2ba;Hist2h2be	RGRKESYSIYVYKVLKQVHPDTGISSKAMGI	120	UID121
	Histone H2B type 3-B;Histone H2B type 3-A;Histone H2B type 2-E	Hist3h2bb;Hist3h2ba;Hist2h2be	0	0	0	0	0	0	0	0	0	0	0	47;47;47	K	VLK(1)QVHPDTGISSK	1	1942	___2	1	4.71e-05	47	Q8CGP0;Q9D2U9;Q64524	47;47;47	Q8CGP0	Q8CGP0	Histone H2B type 3-B;Histone H2B type 3-A;Histone H2B type 2-E	Hist3h2bb;Hist3h2ba;Hist2h2be	RGRKESYSIYVYKVLKQVHPDTGISSKAMGI	120	UID268
	ATP-binding cassette sub-family A member 13	Abca13	181800000	136340000	131890000	89099000	109170000	192810000	132550000	164630000	206000000	161550000	140620000	4671	K	WPRDHSVLQDIVK(0.466)PAK(0.534)DIDVETEQMR	1	1267	___1	0.534203	0.00857975	4671	Q5SSE9	4671	Q5SSE9	Q5SSE9	ATP-binding cassette sub-family A member 13	Abca13	WPRDHSVLQDIVKPAKDIDVETEQMRVLEGR	85	UID86
	ATP-binding cassette sub-family A member 13	Abca13	181800000	136340000	131890000	89099000	109170000	192810000	132550000	164630000	206000000	161550000	140620000	4668	K	WPRDHSVLQDIVK(0.5)PAK(0.5)DIDVETEQMR	1	1267	___1	0.5	0.00857975	4668	Q5SSE9	4668	Q5SSE9	Q5SSE9	ATP-binding cassette sub-family A member 13	Abca13	LLRWPRDHSVLQDIVKPAKDIDVETEQMRVL	84	UID85
			16147000	6606400	8210400	4910900	0	16100000	6102400	19181000	5017700	3442700	3542600	6667	K	YKEKYEK(1)ER	1	14	___1	0.999975	0.0131019	6667	A0A571BF58	6667	A0A571BF58	A0A571BF58			ATELQSIVKYKEKYEKERGKPMLDFETPTYI	1	UID2
	SH3 and PX domain-containing protein 2B	Sh3pxd2b	0	0	0	8110700	0	0	0	14486000	14127000	9744200	9069000	66	K	YSKFFDLQMQMLDK(0.011)FPMEGGQK(0.989)DPK	1	25	___1	0.989106	0.00126112	66	A2AAY5	66	A2AAY5	A2AAY5	SH3 and PX domain-containing protein 2B	Sh3pxd2b	LQMQMLDKFPMEGGQKDPKQRIIPFLPGKIL	2	UID3
