# Supplementary material for: Hbo1 and Msl complexes preserve differential compaction and H3K27me3 marking of active and inactive X chromosomes during mitosis
Source: Research Square preprint supplement (doi:10.21203/rs.3.rs-4687808/v1), 2024-07-16
Supplement: Supplementary file 4 [file cf4ea6cac0d87bb4dcfdb41f.xlsx]

## Sheet: Up in Xa
	Significant	#NAME?	Difference	Protein IDs	Majority protein IDs	Protein names	Gene names	id	Symbol color	Symbol type	Symbol size	Show label	Peptides	Razor + unique peptides	Unique peptides	Sequence coverage [%]	Unique + razor sequence coverage [%]	Unique sequence coverage [%]	Mol. weight [kDa]	Q-value	Score	Intensity	MS/MS count	LFQ intensity Female_chrXa_1	LFQ intensity Female_chrXa_2	LFQ intensity Female_chrXa_3	LFQ intensity Female_chrXi_1	LFQ intensity Female_chrXi_2	LFQ intensity Female_chrXi_3	LFQ intensity Female_chrXi_4	LFQ intensity Pool_1	LFQ intensity Pool_2	LFQ intensity Pool_3	LFQ intensity Male_chrX_1	LFQ intensity Male_chrX_2	LFQ intensity Male_chrX_3	LFQ intensity Male_chrX_4
	+	2.12966	1.13566	E9Q166	E9Q166		Atad2b	172	Color2 [A=255, R=0, G=255, B=0]	9	4		9	9	9	8.3	8.3	8.3	164.72	0	25.865	204440000	42	23.3377	23.7186	23.6474	22.0251	22.1335	22.7994	22.7709	22.3376	23.3924	23.171	23.4303	23.9013	23.1251	23.5413
	+	2.48515	0.864135	O08583;Q9JJW6	O08583	THO complex subunit 4	Alyref	229	Color2 [A=255, R=0, G=255, B=0]	9	4		8	8	8	36.5	36.5	36.5	26.94	0	204.35	12307000000	259	29.3736	29.2089	29.2863	28.2106	28.4124	28.8082	28.2704	28.9651	29.0402	28.8676	30.0877	29.5227	29.3021	28.9164
	+	2.29911	1.1943	P0DP28;P0DP27;P0DP26;P20801	P0DP28;P0DP27;P0DP26			440	Color2 [A=255, R=0, G=255, B=0]	9	4		11	11	6	89.9	89.9	69.8	16.837	0	213.58	17000000000	236	29.8664	29.8018	29.4031	27.9619	28.6999	28.7844	28.5384	29.465	29.5147	29.5102	31.1661	30.0887	30.2075	30.3006
	+	2.59553	0.768717	P18608	P18608	Non-histone chromosomal protein HMG-14	Hmgn1	515	Color2 [A=255, R=0, G=128, B=0]	9	6		2	2	2	43.8	43.8	43.8	10.152	0	243.63	743200000	34	25.0803	25.4794	25.3401	24.551	24.5965	24.2989	24.6785	25.1687	24.9596	25.1293	24.9846	25.2971	25.2792	25.0136
	+	2.40777	0.809831	P23198	P23198	Chromobox protein homolog 3	Cbx3	539	Color2 [A=255, R=0, G=255, B=0]	9	4		9	8	7	45.9	39.3	39.3	20.855	0	167.45	12704000000	260	28.8794	29.2922	29.1783	28.3085	28.3556	28.0313	28.5318	28.4134	28.8536	28.8719	29.3228	28.8123	28.6964	28.9675
	+	2.6828	0.750751	P48725	P48725	Pericentrin	Pcnt	705	Color2 [A=255, R=0, G=255, B=0]	9	4		100	100	100	44.8	44.8	44.8	329.46	0	323.31	7588800000	919	28.7085	28.7009	28.5701	28.0389	27.9122	28.0702	27.615	28.264	28.3127	28.2891	29.6253	28.4947	28.2601	28.3002
	+	2.7667	0.69294	P51912	P51912	Neutral amino acid transporter B(0)	Slc1a5	732	Color2 [A=255, R=0, G=255, B=0]	9	4		2	2	2	4.3	4.3	4.3	58.482	0	15.832	76660000	10	21.8322	22.0254	21.7097	NaN	21.1701	21.179	21.1394	21.6559	22.0984	NaN	22.6975	22.5915	23.6362	21.4403
	+	3.31853	0.776777	P60762	P60762	Mortality factor 4-like protein 1	Morf4l1	805	Color2 [A=255, R=0, G=255, B=0]	9	4		7	5	5	22.9	15.5	15.5	41.492	0	8.2681	221990000	33	23.6722	23.3265	23.3264	22.6534	22.6669	22.665	22.6743	23.4004	23.5828	23.2616	22.9177	23.4672	23.179	23.6866
	+	2.74901	0.92025	P83917	P83917	Chromobox protein homolog 1	Cbx1	976	Color2 [A=255, R=0, G=255, B=0]	9	4		7	6	6	42.2	33.5	33.5	21.418	0	62.148	2760000000	118	27.4605	27.215	27.0179	26.4061	26.2199	26.1053	26.5122	27.0845	26.5741	26.761	27.694	26.896	26.7572	26.8991
	+	3.78186	0.946103	Q3U1J4	Q3U1J4	DNA damage-binding protein 1	Ddb1	1129	Color2 [A=255, R=0, G=255, B=0]	9	4		39	39	39	40	40	40	126.85	0	149.71	4467800000	402	27.7927	27.9825	27.9965	27.0073	26.8949	27.1469	26.8621	27.3394	27.5611	27.5214	28.0128	27.7335	27.6649	27.7446
	+	2.8475	1.06888	Q3UMU9	Q3UMU9	Hepatoma-derived growth factor-related protein 2	Hdgfrp2	1166	Color2 [A=255, R=0, G=128, B=0]	9	6		22	21	20	42.3	41.1	38.6	74.29	0	154.4	4257300000	196	27.92	27.9653	28.3847	26.7979	26.9996	27.2671	27.0198	27.2766	27.3509	27.4998	28.1148	27.5675	27.8588	27.4236
	+	2.41582	1.30846	Q56A10	Q56A10	Zinc finger protein 608	Znf608	1202	Color2 [A=255, R=0, G=255, B=0]	9	4		5	5	5	4.8	4.8	4.8	162.34	0	9.4354	66538000	13	22.3805	21.6777	22.2909	20.9349	21.0135	20.3565	20.9267	21.258	21.1431	21.2181	21.7018	22.0036	22.0386	22.115
	+	3.70701	0.528463	Q5SVQ0	Q5SVQ0	Histone acetyltransferase KAT7	Kat7	1223	Color2 [A=255, R=0, G=255, B=0]	9	4		7	7	6	16	16	14.2	70.641	0	19.19	351970000	49	24.0607	23.9852	23.8932	23.4203	23.5261	23.3859	23.4726	23.612	23.9566	24.1112	23.56	24.3992	24.1762	24.2968
	+	2.76651	1.11346	Q60605;Q8CI43	Q60605	Myosin light polypeptide 6	Myl6	1237	Color2 [A=255, R=0, G=255, B=0]	9	4		13	13	13	76.8	76.8	76.8	16.93	0	146.62	89131000000	437	31.946	31.9612	31.6415	30.5744	30.8256	31.0752	30.4692	31.7707	31.6193	31.6842	33.2868	32.4719	32.3706	32.665
	+	2.90416	0.614483	Q61466	Q61466	SWI/SNF-related matrix-associated actin-dependent regulator of chromatin subfamily D member 1	Smarcd1	1297	Color2 [A=255, R=0, G=128, B=0]	9	6		3	3	3	6.8	6.8	6.8	58.244	0	10.648	81681000	17	22.2525	22.265	22.1527	NaN	NaN	21.5783	21.6395	22.1812	NaN	22.5237	22.6182	22.4891	22.1498	22.2785
	+	3.08751	1.18763	Q61687	Q61687	Transcriptional regulator ATRX	Atrx	1313	Color2 [A=255, R=0, G=255, B=0]	9	4		53	53	53	28.4	28.4	28.4	278.58	0	323.31	6980100000	585	28.5436	28.0844	28.3053	27.0461	26.9376	27.0905	27.4196	28.2145	28.0829	28.1307	29.1999	29.2791	28.8057	28.8631
	+	2.80774	1.44765	Q6PDM1	Q6PDM1	Male-specific lethal 1 homolog	Msl1	1462	Color2 [A=255, R=0, G=255, B=0]	9	4		2	2	2	5.5	5.5	5.5	67.319	0.00043178	3.5364	89934000	16	22.5271	22.9321	22.9842	21.7597	20.9477	21.4389	21.3209	21.985	21.7727	22.2124	22.2272	21.9266	21.6134	22.3699
	+	2.65703	0.95851	Q80TJ7	Q80TJ7	Histone lysine demethylase PHF8	Phf8	1555	Color2 [A=255, R=0, G=128, B=0]	9	6		5	5	4	6	6	4.6	113.55	0	11.435	162320000	40	23.211	23.3701	22.7279	22.1867	22.1808	22.0465	22.164	23.0825	23.3534	22.326	22.8533	23.838	22.5185	23.6271
	+	3.16749	0.892255	Q8BHX3	Q8BHX3	Borealin	Cdca8	1657	Color2 [A=255, R=0, G=255, B=0]	9	4		15	15	15	56.4	56.4	56.4	32.214	0	197.63	9441400000	180	29.0655	29.2168	28.7456	28.1802	28.1258	28.0836	28.0787	28.5861	28.646	28.5827	29.4327	28.9698	28.5702	28.7435
	+	2.91529	1.6133	Q8C0D9	Q8C0D9	Centrosomal protein of 68 kDa	Cep68	1773	Color2 [A=255, R=0, G=255, B=0]	9	4		5	5	5	9	9	9	78.748	0	7.7783	155130000	9	23.3962	22.9373	23.1399	21.3391	21.8179	21.8912	21.1297	NaN	21.5887	22.7786	23.9718	22.7824	23.3441	25.7837
	+	2.0154	2.2786	Q8CB62	Q8CB62	Centrobin	Cntrob	1815	Color2 [A=255, R=0, G=255, B=0]	9	4		14	14	14	22.2	22.2	22.2	99.403	0	118.85	315480000	53	24.6605	24.7405	23.3052	21.3126	22.1379	22.8337	21.5431	23.7046	22.7427	22.5209	26.0933	23.5711	23.6931	23.6568
	+	2.6574	1.43212	Q8CH18	Q8CH18	Cell division cycle and apoptosis regulator protein 1	Ccar1	1858	Color2 [A=255, R=0, G=128, B=0]	9	6		9	9	9	9.6	9.6	9.6	132.06	0	13.63	5290000000	76	28.6783	27.9498	28.6141	26.6277	27.0669	27.2471	26.9862	28.0541	27.7588	26.9494	29.9428	27.8555	26.1032	26.0346
	+	2.34164	0.879134	Q8K389	Q8K389	CDK5 regulatory subunit-associated protein 2	Cdk5rap2	1924	Color2 [A=255, R=0, G=255, B=0]	9	4		29	29	29	18.7	18.7	18.7	205.94	0	91.579	1152400000	179	25.5748	26.1357	25.6185	24.8243	25.022	25.0463	24.6961	25.5638	25.6855	25.5685	27.3814	26.1936	26.1314	26.0832
	+	2.30041	1.35112	Q922V4	Q922V4	Pleiotropic regulator 1	Plrg1	2158	Color2 [A=255, R=0, G=255, B=0]	9	4		4	4	4	14	14	14	56.937	0	13.827	182060000	23	23.8397	24.1	23.4094	21.949	22.3143	22.8233	22.641	22.9523	22.2316	22.3539	22.9783	22.9043	22.9244	22.8772
	+	2.50755	1.04154	Q99JF8	Q99JF8	PC4 and SFRS1-interacting protein	Psip1	2185	Color2 [A=255, R=0, G=128, B=0]	9	6		23	23	22	49.6	49.6	48.1	59.696	0	323.31	8293300000	347	28.4914	28.7265	28.9574	27.3664	27.5968	28.0054	27.7655	28.164	28.3336	28.2976	28.8449	28.9051	29.0309	29.1868
	+	2.7133	0.740532	Q9CZJ6	Q9CZJ6	Protein Mis18-alpha	Mis18a	2435	Color2 [A=255, R=0, G=255, B=0]	9	4		4	4	4	21.1	21.1	21.1	22.949	0	5.8899	368130000	21	24.5877	24.2743	24.0977	23.536	23.6373	23.6213	23.5228	24.4103	23.7703	23.3924	24.0459	23.7764	23.4057	24.0773
	+	2.72341	1.18462	Q9D8Y8	Q9D8Y8	Inhibitor of growth protein 5	Ing5	2560	Color2 [A=255, R=0, G=255, B=0]	9	4		3	3	2	15.4	15.4	10	27.798	0	5.5696	165090000	25	23.77	23.2713	23.4265	22.1815	22.3123	22.4201	NaN	22.7403	22.7917	22.8498	23.3258	23.0946	22.398	22.9497
	+	2.49922	1.00888	Q9JJ94	Q9JJ94	Sjoegren syndrome nuclear autoantigen 1 homolog	Ssna1	2703	Color2 [A=255, R=0, G=255, B=0]	9	4		2	2	2	18.5	18.5	18.5	13.557	0	9.1159	138550000	14	23.3728	23.394	NaN	NaN	22.542	22.2369	22.3447	22.9814	22.0045	23.0316	24.254	22.2264	22.164	22.6717
	+	3.469	0.580829	Q9WTX5	Q9WTX5	S-phase kinase-associated protein 1	Skp1	2826	Color2 [A=255, R=0, G=255, B=0]	9	4		9	9	9	54	54	54	18.672	0	119.98	2173000000	117	26.7144	26.7456	26.7801	26.2838	26.153	26.205	26.0216	26.6471	26.3407	26.2796	26.9083	26.7148	26.5636	26.6118

## Sheet: Up in Xi
	Significant	#NAME?	Difference	Protein IDs	Majority protein IDs	Protein names	Gene names	id	Symbol color	Symbol type	Symbol size	Show label	Peptides	Razor + unique peptides	Unique peptides	Sequence coverage [%]	Unique + razor sequence coverage [%]	Unique sequence coverage [%]	Mol. weight [kDa]	Q-value	Score	Intensity	MS/MS count	LFQ intensity Female_chrXa_1	LFQ intensity Female_chrXa_2	LFQ intensity Female_chrXa_3	LFQ intensity Female_chrXi_1	LFQ intensity Female_chrXi_2	LFQ intensity Female_chrXi_3	LFQ intensity Female_chrXi_4	LFQ intensity Pool_1	LFQ intensity Pool_2	LFQ intensity Pool_3	LFQ intensity Male_chrX_1	LFQ intensity Male_chrX_2	LFQ intensity Male_chrX_3	LFQ intensity Male_chrX_4
	+	2.5976	-1.46127	A2ANY6	A2ANY6		Mdn1	29	Color2 [A=255, R=255, G=180, B=207]	9	4		20	20	20	4.5	4.5	4.5	630.33	0	27.738	286290000	60	23.0266	22.6629	22.4996	24.6618	24.2516	24.1167	23.7338	23.5636	23.6641	23.765	NaN	22.096	22.7952	22.305
	+	2.15318	-1.19382	O54984	O54984	ATPase Asna1	Asna1	312	Color2 [A=255, R=255, G=180, B=207]	9	4		7	7	7	27	27	27	38.822	0	15.739	497960000	17	24.0283	23.8996	23.3374	25.3962	24.5898	25.0239	24.7857	24.35	24.0546	24.4949	23.6289	23.7401	24.1979	23.7239
	+	2.93614	-0.78693	O70194	O70194	Eukaryotic translation initiation factor 3 subunit D	Eif3d	331	Color2 [A=255, R=255, G=180, B=207]	9	4		13	13	13	32.8	32.8	32.8	63.988	0	82.832	1417000000	136	25.3353	25.1331	25.3865	26.3096	26.0319	25.9164	26.0298	26.0756	25.7259	25.7438	25.0032	25.2622	25.1429	25.3402
	+	2.71291	-1.00285	P14685	P14685	26S proteasome non-ATPase regulatory subunit 3	Psmd3	479	Color2 [A=255, R=255, G=180, B=207]	9	4		14	14	14	29.8	29.8	29.8	60.718	0	43.849	1103600000	89	24.7944	24.7887	25.1151	26.0301	26.1742	25.7504	25.6543	25.4399	25.3966	25.4116	23.6043	24.6907	24.793	24.595
	+	2.20633	-1.48405	P28867;Q02111	P28867	Protein kinase C delta type;Protein kinase C delta type regulatory subunit;Protein kinase C delta type catalytic subunit	Prkcd	595	Color2 [A=255, R=255, G=180, B=207]	9	4		8	8	8	13.8	13.8	13.8	77.546	0	123.47	257720000	52	22.6208	22.2092	22.5181	24.7078	23.5394	23.7302	23.7561	23.7142	23.3257	23.1502	NaN	22.3621	22.0947	NaN
	+	2.99807	-0.960005	P31938	P31938	Dual specificity mitogen-activated protein kinase kinase 1	Map2k1	608	Color2 [A=255, R=255, G=180, B=207]	9	4		5	2	2	13.5	7.6	7.6	43.474	0	24.291	60238000	11	20.476	20.7954	20.7137	21.8678	21.526	21.6722	21.4208	21.2403	21.4604	21.4291	20.389	20.9436	21.683	21.3261
	+	2.1742	-0.988897	P39054;Q8BZ98	P39054	Dynamin-2	Dnm2	645	Color2 [A=255, R=255, G=180, B=207]	9	4		9	9	9	14.4	14.4	14.4	98.144	0	32.064	499770000	57	23.5769	23.8496	23.5807	24.9989	24.5754	24.8587	24.1988	23.9581	23.9301	24.278	23.1713	23.7182	24.647	23.6687
	+	2.91923	-0.851096	P41105	P41105	60S ribosomal protein L28	Rpl28	653	Color2 [A=255, R=255, G=180, B=207]	9	4		7	7	7	43.8	43.8	43.8	15.733	0	14.535	4498100000	87	27.0829	27.0165	27.1924	28.2509	27.8563	27.8921	27.7941	27.7814	27.4289	27.6638	26.71	26.524	27.1062	27.0339
	+	2.87877	-0.733377	P50516	P50516	V-type proton ATPase catalytic subunit A	Atp6v1a	720	Color2 [A=255, R=255, G=180, B=207]	9	4		7	7	7	14.4	14.4	14.4	68.325	0	19.804	308050000	20	22.9256	22.8439	NaN	23.5815	23.4791	23.654	23.7578	23.3228	24.0591	23.2784	23.5362	24.2658	24.671	24.4886
	+	2.93521	-0.793104	P61027	P61027	Ras-related protein Rab-10	Rab10	811	Color2 [A=255, R=255, G=180, B=207]	9	4		5	4	4	28	22.5	22.5	22.541	0	10.355	438540000	33	23.3596	23.818	23.5497	24.2992	24.4492	24.316	24.4111	24.2726	24.3121	24.9627	NaN	24.0556	23.9963	24.2573
	+	2.23484	-0.940776	P61750	P61750	ADP-ribosylation factor 4	Arf4	829	Color2 [A=255, R=255, G=180, B=207]	9	4		8	4	3	54.4	25.6	17.8	20.396	0	14.703	703760000	46	24.4616	24.3376	24.5448	25.7892	24.9729	25.3591	25.434	24.2116	25.0456	24.922	23.3602	24.4723	24.5647	24.2885
	+	2.75485	-0.775616	P68040	P68040	Guanine nucleotide-binding protein subunit beta-2-like 1;Guanine nucleotide-binding protein subunit beta-2-like 1, N-terminally processed	Gnb2l1	927	Color2 [A=255, R=255, G=180, B=207]	9	4		17	17	17	75.4	75.4	75.4	35.076	0	232.53	5817600000	295	27.1769	27.1714	27.0494	27.6053	28.0797	27.9725	27.9752	27.7081	27.644	27.7478	27.5748	28.1116	27.7378	28.1966
	+	2.19718	-0.985909	P80313	P80313	T-complex protein 1 subunit eta	Cct7	967	Color2 [A=255, R=255, G=180, B=207]	9	4		16	16	16	36	36	36	59.652	0	74.361	2619000000	176	25.436	25.9217	26.2451	26.9123	27.0459	26.6722	26.7836	26.7029	26.6375	26.5486	25.4332	26.2094	26.682	26.1074
	+	2.5965	-1.00835	P80315	P80315	T-complex protein 1 subunit delta	Cct4	969	Color2 [A=255, R=255, G=180, B=207]	9	4		24	24	24	60.9	60.9	60.9	58.066	0	323.31	3658700000	254	26.0751	26.2956	26.5933	27.2632	27.6445	27.1367	27.2744	27.1141	27.2225	27.0584	25.7339	26.2466	26.9166	26.3961
	+	2.86425	-3.05916	Q61024	Q61024	Asparagine synthetase [glutamine-hydrolyzing]	Asns	1267	Color2 [A=255, R=255, G=180, B=207]	9	4		14	14	14	35.5	35.5	35.5	64.282	0	143.89	1516700000	92	22.8579	22.7334	22.4273	25.8317	26.7327	25.5245	24.8391	26.6006	25.6727	25.5253	23.3258	25.6368	25.402	25.3451
	+	3.22037	-0.676784	Q68FL6	Q68FL6	Methionine--tRNA ligase, cytoplasmic	Mars	1389	Color2 [A=255, R=255, G=180, B=207]	9	4		24	24	24	30.7	30.7	30.7	101.43	0	280.01	2731500000	221	26.273	26.1588	26.4403	26.8342	27.028	27.0403	26.9673	26.5428	26.7933	26.7943	25.854	26.3041	26.6974	26.545
	+	2.36465	-0.891566	Q6P9P6	Q6P9P6	Kinesin-like protein KIF11	Kif11	1451	Color2 [A=255, R=255, G=180, B=207]	9	4		34	34	34	37.7	37.7	37.7	118.03	0	145.55	2850900000	259	26.3923	26.2153	26.8387	27.5461	27.432	27.1779	27.3388	26.7813	26.8791	27.1803	NaN	25.7832	26.6611	25.5989
	+	3.23563	-0.542464	Q7TPV4	Q7TPV4	Myb-binding protein 1A	Mybbp1a	1536	Color2 [A=255, R=255, G=180, B=207]	9	4		48	48	48	44.5	44.5	44.5	152.04	0	323.31	16499000000	670	29.257	29.1455	29.1746	29.8711	29.6094	29.7047	29.7541	29.3265	29.2868	29.3568	28.8789	28.9523	28.8308	28.9258
	+	2.38185	-0.872755	Q8BHY2	Q8BHY2	Nucleolar complex protein 4 homolog	Noc4l	1658	Color2 [A=255, R=255, G=180, B=207]	9	4		7	7	7	19.4	19.4	19.4	58.675	0	34.127	550540000	36	24.1817	24.2809	23.743	25.1595	24.8181	24.7686	25.019	24.2232	24.0488	24.2538	22.5636	24.3251	23.8464	23.9404
	+	2.78919	-0.871816	Q8BMJ2	Q8BMJ2	Leucine--tRNA ligase, cytoplasmic	Lars	1692	Color2 [A=255, R=255, G=180, B=207]	9	4		37	37	37	36.8	36.8	36.8	134.19	0	218.12	4379900000	354	26.7375	26.5872	26.9669	27.8482	27.7144	27.4449	27.5352	27.3513	27.5195	27.4498	26.4002	27.0585	27.1872	27.0774
	+	2.78295	-0.689693	Q8BML9	Q8BML9		Qars	1695	Color2 [A=255, R=255, G=180, B=207]	9	4		17	16	16	29.3	28.3	28.3	87.676	0	47.606	1276200000	102	25.292	25.2496	25.1761	26.1815	25.7492	25.9246	25.8605	25.7898	25.7797	25.7397	22.781	25.236	25.5904	24.9608
	+	2.64695	-0.822571	Q8BU30	Q8BU30	Isoleucine--tRNA ligase, cytoplasmic	Iars	1730	Color2 [A=255, R=255, G=180, B=207]	9	4		40	40	40	39.1	39.1	39.1	144.27	0	230.76	4834200000	319	26.8699	26.6873	27.1513	27.7362	27.9039	27.723	27.5385	27.5327	27.5604	27.4387	26.795	27.4792	27.5329	27.2892
	+	3.29896	-1.93978	Q8CIE6	Q8CIE6	Coatomer subunit alpha;Xenin;Proxenin	Copa	1868	Color2 [A=255, R=255, G=180, B=207]	9	4		21	21	21	20.3	20.3	20.3	138.43	0	70.787	985900000	116	23.6225	23.5975	24.3561	25.5303	25.846	26.047	25.7707	25.2125	25.2917	25.5017	20.994	24.806	25.2422	24.8991
	+	2.76923	-1.03941	Q8CIH9	Q8CIH9	Amidophosphoribosyltransferase	Ppat	1871	Color2 [A=255, R=255, G=180, B=207]	9	4		5	5	5	11.6	11.6	11.6	57.402	0	8.5479	113950000	25	21.4779	NaN	21.6006	NaN	22.6852	22.4589	22.5919	21.6463	22.4903	22.2964	NaN	22.4042	22.1032	22.7033
	+	2.46501	-0.880413	Q8K205	Q8K205		Pop1	1898	Color2 [A=255, R=255, G=180, B=207]	9	4		13	13	13	14.7	14.7	14.7	117.37	0	34.786	575870000	79	24.3649	24.3591	23.9616	25.1899	25.0808	24.8288	25.3362	24.5231	24.4211	24.7724	22.4345	23.7901	23.752	24.2607
	+	2.38187	-1.08809	Q8K4L0	Q8K4L0	ATP-dependent RNA helicase DDX54	Ddx54	1941	Color2 [A=255, R=255, G=180, B=207]	9	4		6	6	6	9.4	9.4	9.4	97.747	0	38.804	194020000	21	NaN	22.2107	22.6686	23.6193	23.368	23.7048	23.4189	22.7661	23.3572	23.3328	NaN	22.7453	22.9531	22.9703
	+	2.19537	-1.02495	Q8QZY1	Q8QZY1	Eukaryotic translation initiation factor 3 subunit L	Eif3l	1951	Color2 [A=255, R=255, G=180, B=207]	9	4		18	18	18	37.8	37.8	37.8	66.612	0	143.26	1370400000	128	24.4048	24.9779	25.2505	25.7719	26.0704	25.9967	25.7718	25.6145	25.7507	25.6118	25.0066	25.3006	26.1618	25.5285
	+	2.76279	-2.22398	Q8VDJ3	Q8VDJ3	Vigilin	Hdlbp	2022	Color2 [A=255, R=255, G=180, B=207]	9	4		23	23	23	23	23	23	141.74	0	89.914	1057800000	120	23.5464	22.8103	24.0239	26.0339	25.7603	25.1741	25.7684	25.6109	25.6992	25.1809	22.7544	25.3316	25.4412	24.606
	+	2.36999	-1.09996	Q91V92	Q91V92	ATP-citrate synthase	Acly	2061	Color2 [A=255, R=255, G=180, B=207]	9	4		28	28	28	29.5	29.5	29.5	119.73	0	88.973	2928200000	201	25.6217	25.8125	26.0663	26.6338	27.2955	26.6786	27.1258	26.6768	26.9091	26.9342	23.2724	26.4089	26.3647	26.4766
	+	2.84139	-0.73414	Q91Z53	Q91Z53	Glyoxylate reductase/hydroxypyruvate reductase	Grhpr	2119	Color2 [A=255, R=255, G=180, B=207]	9	4		3	3	3	13.1	13.1	13.1	35.328	0	5.1027	166600000	10	22.1241	22.4341	22.4412	23.2055	22.922	23.1384	23.0032	22.8957	23.2634	22.3313	21.8334	23.0675	NaN	22.7184
	+	2.28452	-0.873916	Q922B2	Q922B2	Aspartate--tRNA ligase, cytoplasmic	Dars	2142	Color2 [A=255, R=255, G=180, B=207]	9	4		27	27	27	54.7	54.7	54.7	57.147	0	164.47	4773200000	285	26.6716	26.7149	27.333	27.8743	27.7918	27.6816	27.7737	27.639	27.475	27.6181	26.5725	27.2751	27.3914	27.3263
	+	3.04322	-0.798386	Q99JI4	Q99JI4	26S proteasome non-ATPase regulatory subunit 6	Psmd6	2186	Color2 [A=255, R=255, G=180, B=207]	9	4		11	11	11	31.9	31.9	31.9	45.536	0	19.648	923700000	79	24.5807	24.6581	24.7678	25.2193	25.4869	25.6327	25.5301	25.0889	25.2459	25.3488	22.7566	24.5028	24.7621	24.9468
	+	2.27996	-0.927814	Q99JX3	Q99JX3	Golgi reassembly-stacking protein 2	Gorasp2	2193	Color2 [A=255, R=255, G=180, B=207]	9	4		4	4	4	10.9	10.9	10.9	47.038	0	6.8763	142360000	24	21.8599	21.932	21.9852	23.2933	22.8747	22.5151	22.7308	22.7006	22.5514	22.962	22.0798	22.0488	22.1805	22.3291
	+	2.47076	-0.8171	Q99ME9	Q99ME9	Nucleolar GTP-binding protein 1	Gtpbp4	2247	Color2 [A=255, R=255, G=180, B=207]	9	4		24	24	24	37.7	37.7	37.7	74.112	0	68.388	3204000000	203	26.3825	26.7246	26.4779	27.5381	27.2728	27.0648	27.506	26.8168	27.0943	26.9508	25.7368	27.0623	26.5295	26.8158
	+	2.53019	-0.708253	Q99PV0	Q99PV0	Pre-mRNA-processing-splicing factor 8	Prpf8	2265	Color2 [A=255, R=255, G=180, B=207]	9	4		41	41	41	23.4	23.4	23.4	273.61	0	140.06	2651500000	266	26.3671	26.0761	26.3887	26.7725	27.0821	27.156	26.9315	26.8251	26.7461	26.6867	25.8309	26.5522	26.5048	26.4231
	+	2.73135	-0.869347	Q9D0I9	Q9D0I9	Arginine--tRNA ligase, cytoplasmic	Rars	2467	Color2 [A=255, R=255, G=180, B=207]	9	4		25	25	25	44.1	44.1	44.1	75.673	0	95.03	3022800000	257	26.1493	26.1223	26.6095	27.0768	27.1368	27.1299	27.3087	26.7932	26.8756	26.9936	25.2094	26.623	26.9373	26.6253
	+	3.11881	-0.721526	Q9D0R2;Q8BLY2	Q9D0R2	Threonine--tRNA ligase, cytoplasmic	Tars	2476	Color2 [A=255, R=255, G=180, B=207]	9	4		14	14	14	25.8	25.8	25.8	83.355	0	32.831	810970000	94	24.2175	24.3235	24.6069	25.1191	25.1367	25.0641	25.0967	25.0488	24.8534	25.0259	24.1446	24.784	24.4984	24.872
	+	2.67964	-0.711825	Q9D6Z1	Q9D6Z1	Nucleolar protein 56	Nop56	2528	Color2 [A=255, R=255, G=180, B=207]	9	4		28	28	28	60.2	60.2	60.2	64.464	0	323.31	8407200000	405	28.067	28.3361	28.1021	29.0473	28.9195	28.6466	28.9075	28.2553	28.3057	28.2992	27.1058	27.908	27.5067	27.6732
	+	2.50419	-0.824192	Q9EQ61	Q9EQ61	Pescadillo homolog	Pes1	2636	Color2 [A=255, R=255, G=180, B=207]	9	4		16	16	16	35.8	35.8	35.8	67.795	0	89.49	2286800000	163	26.0144	26.2116	25.9875	27.0198	26.9644	26.5373	27.0599	26.6333	26.3996	26.5901	25.2598	26.1469	26.0841	26.2981
	+	2.1223	-1.97813	Q9JHW4	Q9JHW4	Selenocysteine-specific elongation factor	Eefsec	2684	Color2 [A=255, R=255, G=180, B=207]	9	4		7	7	7	14.1	14.1	14.1	63.538	0	6.2446	107860000	17	NaN	20.7821	21.1107	NaN	22.6285	23.3489	22.7961	22.4578	22.2374	NaN	NaN	21.9339	22.0452	22.2691
	+	2.44766	-1.01197	Q9QUJ7	Q9QUJ7	Long-chain-fatty-acid--CoA ligase 4	Acsl4	2745	Color2 [A=255, R=255, G=180, B=207]	9	4		8	8	7	16.9	16.9	15.3	79.076	0	22.731	653630000	62	23.7198	24.0304	24.3758	25.2627	25.1764	24.8786	24.8981	24.6798	24.9508	24.7871	22.2339	24.5267	24.7169	24.5465
	+	2.37462	-1.42902	Q9QZQ8	Q9QZQ8	Core histone macro-H2A.1	H2afy	2787	Color2 [A=255, R=255, G=180, B=219]	9	4		22	22	20	66.1	66.1	59.1	39.735	0	323.31	78616000000	814	30.9112	31.317	30.7794	33.0597	32.0902	32.2804	32.2959	31.5323	31.6769	31.507	29.9882	31.0133	30.6846	30.9278
	+	2.5681	-1.09069	Q9WV70	Q9WV70	Nucleolar complex protein 2 homolog	Noc2l	2847	Color2 [A=255, R=255, G=180, B=207]	9	4		8	8	8	10	10	10	85.423	0	41.96	410050000	46	23.4352	23.321	23.4069	24.1775	24.8931	24.2478	24.5951	24.2232	23.8695	24.0184	22.4892	23.9345	23.5192	23.8316
