# Supplementary material for: Hbo1 and Msl complexes preserve differential compaction and H3K27me3 marking of active and inactive X chromosomes during mitosis
Source: Research Square preprint supplement (doi:10.21203/rs.3.rs-4687808/v1), 2024-07-16
Supplement: Supplementary file 5 [file f6bca3fe28af451c16d85920.xlsx]

## Sheet: proteinGroups
Protein IDs	Majority protein IDs	Peptide counts (all)	Peptide counts (razor+unique)	Peptide counts (unique)	Protein names	Gene names	Fasta headers	Number of proteins	Peptides	Razor + unique peptides	Unique peptides	Peptides before_A1	Peptides before_A2	Peptides before_B1	Peptides before_B2	Peptides before_C1	Peptides before_C2	Peptides sorted_A1	Peptides sorted_A2	Peptides sorted_B1	Peptides sorted_B2	Peptides sorted_C1	Peptides sorted_C2	Razor + unique peptides before_A1	Razor + unique peptides before_A2	Razor + unique peptides before_B1	Razor + unique peptides before_B2	Razor + unique peptides before_C1	Razor + unique peptides before_C2	Razor + unique peptides sorted_A1	Razor + unique peptides sorted_A2	Razor + unique peptides sorted_B1	Razor + unique peptides sorted_B2	Razor + unique peptides sorted_C1	Razor + unique peptides sorted_C2	Unique peptides before_A1	Unique peptides before_A2	Unique peptides before_B1	Unique peptides before_B2	Unique peptides before_C1	Unique peptides before_C2	Unique peptides sorted_A1	Unique peptides sorted_A2	Unique peptides sorted_B1	Unique peptides sorted_B2	Unique peptides sorted_C1	Unique peptides sorted_C2	Sequence coverage [%]	Unique + razor sequence coverage [%]
Q8VDD5	Q8VDD5	213	213	178	Myosin-9	Myh9	sp|Q8VDD5|MYH9_MOUSE Myosin-9 OS=Mus musculus GN=Myh9 PE=1 SV=4	1	213	213	178	200	196	169	185	186	194	139	134	140	127	149	155	200	196	169	185	186	194	139	134	140	127	149	155	167	163	139	153	156	162	118	111	116	106	124	129	74.3	74.3
E9PVX6	E9PVX6	188	188	188		Mki67	sp|E9PVX6|KI67_MOUSE Proliferation marker protein Ki-67 OS=Mus musculus GN=Mki67 PE=1 SV=1	1	188	188	188	152	142	126	150	121	122	139	137	130	112	124	133	152	142	126	150	121	122	139	137	130	112	124	133	152	142	126	150	121	122	139	137	130	112	124	133	65.3	65.3
Q9JHU4	Q9JHU4	162	162	162	Cytoplasmic dynein 1 heavy chain 1	Dync1h1	sp|Q9JHU4|DYHC1_MOUSE Cytoplasmic dynein 1 heavy chain 1 OS=Mus musculus GN=Dync1h1 PE=1 SV=2	1	162	162	162	125	132	123	129	138	133	96	90	75	70	103	94	125	132	123	129	138	133	96	90	75	70	103	94	125	132	123	129	138	133	96	90	75	70	103	94	42.9	42.9
P16546;P08032	P16546	139;1	139;1	139;1	Spectrin alpha chain, non-erythrocytic 1	Sptan1	sp|P16546|SPTN1_MOUSE Spectrin alpha chain, non-erythrocytic 1 OS=Mus musculus GN=Sptan1 PE=1 SV=4	2	139	139	139	128	129	114	124	108	107	68	67	53	53	47	48	128	129	114	124	108	107	68	67	53	53	47	48	128	129	114	124	108	107	68	67	53	53	47	48	60.2	60.2
P26039	P26039	137	137	124	Talin-1	Tln1	sp|P26039|TLN1_MOUSE Talin-1 OS=Mus musculus GN=Tln1 PE=1 SV=2	1	137	137	124	117	121	99	111	110	105	72	75	62	62	86	81	117	121	99	111	110	105	72	75	62	62	86	81	107	111	90	101	100	97	66	69	57	57	78	74	67.7	67.7
P48725	P48725	120	120	120	Pericentrin	Pcnt	sp|P48725|PCNT_MOUSE Pericentrin OS=Mus musculus GN=Pcnt PE=1 SV=2	1	120	120	120	87	86	80	91	83	80	71	72	57	51	74	64	87	86	80	91	83	80	71	72	57	51	74	64	87	86	80	91	83	80	71	72	57	51	74	64	51.6	51.6
Q9ERU9	Q9ERU9	117	117	117	E3 SUMO-protein ligase RanBP2	Ranbp2	sp|Q9ERU9|RBP2_MOUSE E3 SUMO-protein ligase RanBP2 OS=Mus musculus GN=Ranbp2 PE=1 SV=2	1	117	117	117	105	101	88	100	98	99	60	55	56	46	58	63	105	101	88	100	98	99	60	55	56	46	58	63	105	101	88	100	98	99	60	55	56	46	58	63	46.9	46.9
Q62261	Q62261	116	116	112	Spectrin beta chain, non-erythrocytic 1	Sptbn1	sp|Q62261|SPTB2_MOUSE Spectrin beta chain, non-erythrocytic 1 OS=Mus musculus GN=Sptbn1 PE=1 SV=2	1	116	116	112	103	106	91	100	85	87	50	48	55	41	38	43	103	106	91	100	85	87	50	48	55	41	38	43	100	103	87	97	82	84	50	48	55	41	38	43	61.1	61.1
E9PVA8	E9PVA8	113	113	113		Gcn1l1	sp|E9PVA8|GCN1_MOUSE eIF-2-alpha kinase activator GCN1 OS=Mus musculus GN=Gcn1 PE=1 SV=1	1	113	113	113	96	93	90	93	94	97	65	60	49	45	66	70	96	93	90	93	94	97	65	60	49	45	66	70	96	93	90	93	94	97	65	60	49	45	66	70	52.3	52.3
P19096	P19096	110	110	110	Fatty acid synthase;[Acyl-carrier-protein] S-acetyltransferase;[Acyl-carrier-protein] S-malonyltransferase;3-oxoacyl-[acyl-carrier-protein] synthase;3-oxoacyl-[acyl-carrier-protein] reductase;3-hydroxyacyl-[acyl-carrier-protein] dehydratase;Enoyl-[acyl-carrier-protein] reductase;Oleoyl-[acyl-carrier-protein] hydrolase	Fasn	sp|P19096|FAS_MOUSE Fatty acid synthase OS=Mus musculus GN=Fasn PE=1 SV=2	1	110	110	110	100	97	93	98	95	92	67	62	64	48	64	71	100	97	93	98	95	92	67	62	64	48	64	71	100	97	93	98	95	92	67	62	64	48	64	71	57.9	57.9
Q64511	Q64511	106	106	91	DNA topoisomerase 2-beta	Top2b	sp|Q64511|TOP2B_MOUSE DNA topoisomerase 2-beta OS=Mus musculus GN=Top2b PE=1 SV=2	1	106	106	91	90	88	78	88	78	85	83	76	82	78	76	73	90	88	78	88	78	85	83	76	82	78	76	73	75	73	64	73	64	70	68	64	71	65	63	60	62	62
Q6PDQ2;A2A8L1	Q6PDQ2	103;18	103;18	103;18	Chromodomain-helicase-DNA-binding protein 4	Chd4	sp|Q6PDQ2|CHD4_MOUSE Chromodomain-helicase-DNA-binding protein 4 OS=Mus musculus GN=Chd4 PE=1 SV=1	2	103	103	103	88	83	74	85	78	79	70	61	66	50	64	62	88	83	74	85	78	79	70	61	66	50	64	62	88	83	74	85	78	79	70	61	66	50	64	62	58.7	58.7
Q99PV0	Q99PV0	98	98	98	Pre-mRNA-processing-splicing factor 8	Prpf8	sp|Q99PV0|PRP8_MOUSE Pre-mRNA-processing-splicing factor 8 OS=Mus musculus GN=Prpf8 PE=1 SV=2	1	98	98	98	87	84	73	82	84	86	53	54	46	49	60	63	87	84	73	82	84	86	53	54	46	49	60	63	87	84	73	82	84	86	53	54	46	49	60	63	48.2	48.2
E9Q7G0	E9Q7G0	97	97	97		Numa1	sp|E9Q7G0|NUMA1_MOUSE Nuclear mitotic apparatus protein 1 OS=Mus musculus GN=Numa1 PE=1 SV=1	1	97	97	97	81	81	62	73	78	70	62	64	59	48	60	55	81	81	62	73	78	70	62	64	59	48	60	55	81	81	62	73	78	70	62	64	59	48	60	55	54.7	54.7
Q68FD5	Q68FD5	97	97	97	Clathrin heavy chain 1	Cltc	sp|Q68FD5|CLH1_MOUSE Clathrin heavy chain 1 OS=Mus musculus GN=Cltc PE=1 SV=3	1	97	97	97	91	91	83	91	90	95	61	60	45	37	56	58	91	91	83	91	90	95	61	60	45	37	56	58	91	91	83	91	90	95	61	60	45	37	56	58	63	63
Q6P4T2	Q6P4T2	96	96	96	U5 small nuclear ribonucleoprotein 200 kDa helicase	Snrnp200	sp|Q6P4T2|U520_MOUSE U5 small nuclear ribonucleoprotein 200 kDa helicase OS=Mus musculus GN=Snrnp200 PE=1 SV=1	1	96	96	96	87	85	82	86	83	83	61	57	53	47	57	65	87	85	82	86	83	83	61	57	53	47	57	65	87	85	82	86	83	83	61	57	53	47	57	65	53.1	53.1
Q6RT24	Q6RT24	96	96	96	Centromere-associated protein E	Cenpe	sp|Q6RT24|CENPE_MOUSE Centromere-associated protein E OS=Mus musculus GN=Cenpe PE=1 SV=1	1	96	96	96	67	66	56	65	67	59	60	56	60	53	57	53	67	66	56	65	67	59	60	56	60	53	57	53	67	66	56	65	67	59	60	56	60	53	57	53	44	44
Q80SU7	Q80SU7	96	96	96	Interferon-induced very large GTPase 1	Gvin1	sp|Q80SU7|GVIN1_MOUSE Interferon-induced very large GTPase 1 OS=Mus musculus GN=Gvin1 PE=1 SV=1	1	96	96	96	79	70	67	76	85	86	54	43	41	37	62	65	79	70	67	76	85	86	54	43	41	37	62	65	79	70	67	76	85	86	54	43	41	37	62	65	45.7	45.7
Q9QXS1;Q8R0W0	Q9QXS1	96;2	96;2	96;2	Plectin	Plec	sp|Q9QXS1|PLEC_MOUSE Plectin OS=Mus musculus GN=Plec PE=1 SV=3	2	96	96	96	68	62	68	73	57	62	24	22	23	21	28	28	68	62	68	73	57	62	24	22	23	21	28	28	68	62	68	73	57	62	24	22	23	21	28	28	25.6	25.6
Q9QXZ0	Q9QXZ0	96	96	96	Microtubule-actin cross-linking factor 1	Macf1	sp|Q9QXZ0|MACF1_MOUSE Microtubule-actin cross-linking factor 1 OS=Mus musculus GN=Macf1 PE=1 SV=2	1	96	96	96	71	74	67	70	62	64	24	28	21	19	31	29	71	74	67	70	62	64	24	28	21	19	31	29	71	74	67	70	62	64	24	28	21	19	31	29	17.5	17.5
Q9JKF1	Q9JKF1	87	87	83	Ras GTPase-activating-like protein IQGAP1	Iqgap1	sp|Q9JKF1|IQGA1_MOUSE Ras GTPase-activating-like protein IQGAP1 OS=Mus musculus GN=Iqgap1 PE=1 SV=2	1	87	87	83	76	74	74	74	78	80	57	52	41	34	57	58	76	74	74	74	78	80	57	52	41	34	57	58	72	70	71	70	74	77	53	49	39	31	53	54	65.2	65.2
Q01320	Q01320	100	85	85	DNA topoisomerase 2-alpha	Top2a	sp|Q01320|TOP2A_MOUSE DNA topoisomerase 2-alpha OS=Mus musculus GN=Top2a PE=1 SV=2	1	100	85	85	90	94	81	90	84	84	75	76	71	72	79	70	75	79	67	75	70	69	60	64	60	59	66	57	75	79	67	75	70	69	60	64	60	59	66	57	59.4	52.7
Q6P5D8	Q6P5D8	85	85	85	Structural maintenance of chromosomes flexible hinge domain-containing protein 1	Smchd1	sp|Q6P5D8|SMHD1_MOUSE Structural maintenance of chromosomes flexible hinge domain-containing protein 1 OS=Mus musculus GN=Smchd1 PE=1 SV=2	1	85	85	85	67	67	60	72	68	74	45	49	44	36	50	46	67	67	60	72	68	74	45	49	44	36	50	46	67	67	60	72	68	74	45	49	44	36	50	46	50.5	50.5
P13864	P13864	82	82	82	DNA (cytosine-5)-methyltransferase 1	Dnmt1	sp|P13864|DNMT1_MOUSE DNA (cytosine-5)-methyltransferase 1 OS=Mus musculus GN=Dnmt1 PE=1 SV=5	1	82	82	82	70	66	64	67	69	65	55	56	48	41	52	52	70	66	64	67	69	65	55	56	48	41	52	52	70	66	64	67	69	65	55	56	48	41	52	52	57.1	57.1
Q61687	Q61687	78	78	78	Transcriptional regulator ATRX	Atrx	sp|Q61687|ATRX_MOUSE Transcriptional regulator ATRX OS=Mus musculus GN=Atrx PE=1 SV=3	1	78	78	78	58	59	49	56	53	51	43	52	38	41	44	41	58	59	49	56	53	51	43	52	38	41	44	41	58	59	49	56	53	51	43	52	38	41	44	41	38.4	38.4
B2RQC6;Q8C196	B2RQC6	77;2	77;2	77;2	CAD protein;Glutamine-dependent carbamoyl-phosphate synthase;Aspartate carbamoyltransferase;Dihydroorotase	Cad	sp|B2RQC6|PYR1_MOUSE CAD protein OS=Mus musculus GN=Cad PE=1 SV=1	2	77	77	77	68	68	66	63	59	64	42	44	43	38	41	42	68	68	66	63	59	64	42	44	43	38	41	42	68	68	66	63	59	64	42	44	43	38	41	42	48.9	48.9
Q7TPV4	Q7TPV4	77	77	77	Myb-binding protein 1A	Mybbp1a	sp|Q7TPV4|MBB1A_MOUSE Myb-binding protein 1A OS=Mus musculus GN=Mybbp1a PE=1 SV=2	1	77	77	77	72	70	66	67	65	65	49	49	44	42	44	43	72	70	66	67	65	65	49	49	44	42	44	43	72	70	66	67	65	65	49	49	44	42	44	43	58.6	58.6
A2AGT5	A2AGT5	76	76	76	Cytoskeleton-associated protein 5	Ckap5	sp|A2AGT5|CKAP5_MOUSE Cytoskeleton-associated protein 5 OS=Mus musculus GN=Ckap5 PE=1 SV=1	1	76	76	76	59	59	55	58	60	52	46	40	38	39	41	39	59	59	55	58	60	52	46	40	38	39	41	39	59	59	55	58	60	52	46	40	38	39	41	39	40.2	40.2
P23116	P23116	76	76	76	Eukaryotic translation initiation factor 3 subunit A	Eif3a	sp|P23116|EIF3A_MOUSE Eukaryotic translation initiation factor 3 subunit A OS=Mus musculus GN=Eif3a PE=1 SV=5	1	76	76	76	65	65	59	63	65	60	32	42	40	26	41	40	65	65	59	63	65	60	32	42	40	26	41	40	65	65	59	63	65	60	32	42	40	26	41	40	53.6	53.6
Q7TMY8	Q7TMY8	75	75	75	E3 ubiquitin-protein ligase HUWE1	Huwe1	sp|Q7TMY8|HUWE1_MOUSE E3 ubiquitin-protein ligase HUWE1 OS=Mus musculus GN=Huwe1 PE=1 SV=5	1	75	75	75	54	58	51	54	55	59	20	21	18	15	27	30	54	58	51	54	55	59	20	21	18	15	27	30	54	58	51	54	55	59	20	21	18	15	27	30	23.7	23.7
Q8CGC7	Q8CGC7	75	75	74	Bifunctional glutamate/proline--tRNA ligase;Glutamate--tRNA ligase;Proline--tRNA ligase	Eprs	sp|Q8CGC7|SYEP_MOUSE Bifunctional glutamate/proline--tRNA ligase OS=Mus musculus GN=Eprs PE=1 SV=4	1	75	75	74	63	66	54	61	62	66	47	42	30	30	45	48	63	66	54	61	62	66	47	42	30	30	45	48	62	65	54	60	61	65	47	42	29	30	44	47	58.6	58.6
A2AN08	A2AN08	74	74	74	E3 ubiquitin-protein ligase UBR4	Ubr4	sp|A2AN08|UBR4_MOUSE E3 ubiquitin-protein ligase UBR4 OS=Mus musculus GN=Ubr4 PE=1 SV=1	1	74	74	74	57	64	57	57	54	57	22	24	22	18	37	35	57	64	57	57	54	57	22	24	22	18	37	35	57	64	57	57	54	57	22	24	22	18	37	35	18.9	18.9
F6ZDS4	F6ZDS4	74	74	74	Nucleoprotein TPR	Tpr	sp|F6ZDS4|TPR_MOUSE Nucleoprotein TPR OS=Mus musculus GN=Tpr PE=1 SV=1	1	74	74	74	63	57	50	63	54	51	10	9	8	7	16	16	63	57	50	63	54	51	10	9	8	7	16	16	63	57	50	63	54	51	10	9	8	7	16	16	34.8	34.8
Q60952	Q60952	74	74	74	Centrosome-associated protein CEP250	Cep250	sp|Q60952|CP250_MOUSE Centrosome-associated protein CEP250 OS=Mus musculus GN=Cep250 PE=1 SV=4	1	74	74	74	51	54	48	53	55	51	37	38	40	34	38	38	51	54	48	53	55	51	37	38	40	34	38	38	51	54	48	53	55	51	37	38	40	34	38	38	37.7	37.7
Q8CG48	Q8CG48	73	73	73	Structural maintenance of chromosomes protein 2	Smc2	sp|Q8CG48|SMC2_MOUSE Structural maintenance of chromosomes protein 2 OS=Mus musculus GN=Smc2 PE=1 SV=2	1	73	73	73	65	64	53	64	64	61	53	49	45	37	51	52	65	64	53	64	64	61	53	49	45	37	51	52	65	64	53	64	64	61	53	49	45	37	51	52	58.7	58.7
P11499	P11499	72	72	53	Heat shock protein HSP 90-beta	Hsp90ab1	sp|P11499|HS90B_MOUSE Heat shock protein HSP 90-beta OS=Mus musculus GN=Hsp90ab1 PE=1 SV=3	1	72	72	53	67	69	59	64	66	67	44	42	35	41	49	48	67	69	59	64	66	67	44	42	35	41	49	48	49	50	41	47	48	48	30	28	21	30	34	32	74.4	74.4
Q9CU62	Q9CU62	72	72	72	Structural maintenance of chromosomes protein 1A	Smc1a	sp|Q9CU62|SMC1A_MOUSE Structural maintenance of chromosomes protein 1A OS=Mus musculus GN=Smc1a PE=1 SV=4	1	72	72	72	64	62	54	59	62	59	45	47	37	38	42	39	64	62	54	59	62	59	45	47	37	38	42	39	64	62	54	59	62	59	45	47	37	38	42	39	56	56
Q6ZQ08	Q6ZQ08	71	71	71	CCR4-NOT transcription complex subunit 1	Cnot1	sp|Q6ZQ08|CNOT1_MOUSE CCR4-NOT transcription complex subunit 1 OS=Mus musculus GN=Cnot1 PE=1 SV=2	1	71	71	71	62	58	56	59	59	60	31	34	30	20	33	35	62	58	56	59	59	60	31	34	30	20	33	35	62	58	56	59	59	60	31	34	30	20	33	35	38.4	38.4
Q8C3J5	Q8C3J5	70	70	70	Dedicator of cytokinesis protein 2	Dock2	sp|Q8C3J5|DOCK2_MOUSE Dedicator of cytokinesis protein 2 OS=Mus musculus GN=Dock2 PE=1 SV=3	1	70	70	70	57	58	55	55	54	58	35	39	29	34	35	37	57	58	55	55	54	58	35	39	29	34	35	37	57	58	55	55	54	58	35	39	29	34	35	37	46.6	46.6
Q8CG47	Q8CG47	69	69	69	Structural maintenance of chromosomes protein 4	Smc4	sp|Q8CG47|SMC4_MOUSE Structural maintenance of chromosomes protein 4 OS=Mus musculus GN=Smc4 PE=1 SV=1	1	69	69	69	51	57	47	55	52	58	44	46	42	35	45	47	51	57	47	55	52	58	44	46	42	35	45	47	51	57	47	55	52	58	44	46	42	35	45	47	53.3	53.3
Q9Z277	Q9Z277	69	69	69	Tyrosine-protein kinase BAZ1B	Baz1b	sp|Q9Z277|BAZ1B_MOUSE Tyrosine-protein kinase BAZ1B OS=Mus musculus GN=Baz1b PE=1 SV=2	1	69	69	69	56	55	49	52	53	51	47	52	41	41	51	48	56	55	49	52	53	51	47	52	41	41	51	48	56	55	49	52	53	51	47	52	41	41	51	48	49.1	49.1
Q6P9L6	Q6P9L6	67	67	67	Kinesin-like protein KIF15	Kif15	sp|Q6P9L6|KIF15_MOUSE Kinesin-like protein KIF15 OS=Mus musculus GN=Kif15 PE=1 SV=1	1	67	67	67	59	60	45	57	56	55	31	32	22	19	28	32	59	60	45	57	56	55	31	32	22	19	28	32	59	60	45	57	56	55	31	32	22	19	28	32	50.9	50.9
P58252	P58252	66	66	65	Elongation factor 2	Eef2	sp|P58252|EF2_MOUSE Elongation factor 2 OS=Mus musculus GN=Eef2 PE=1 SV=2	1	66	66	65	63	63	58	62	62	61	37	39	31	30	40	42	63	63	58	62	62	61	37	39	31	30	40	42	62	62	57	61	61	60	36	38	31	29	39	41	75.9	75.9
Q920B9	Q920B9	66	66	66	FACT complex subunit SPT16	Supt16h	sp|Q920B9|SP16H_MOUSE FACT complex subunit SPT16 OS=Mus musculus GN=Supt16h PE=1 SV=2	1	66	66	66	55	56	48	47	52	55	43	48	43	42	54	49	55	56	48	47	52	55	43	48	43	42	54	49	55	56	48	47	52	55	43	48	43	42	54	49	55.4	55.4
A2AL36	A2AL36	65	65	65	Centriolin	Cntrl	sp|A2AL36|CNTRL_MOUSE Centriolin OS=Mus musculus GN=Cntrl PE=1 SV=2	1	65	65	65	45	43	44	45	42	38	48	48	41	39	35	40	45	43	44	45	42	38	48	48	41	39	35	40	45	43	44	45	42	38	48	48	41	39	35	40	33.7	33.7
Q8BTI8	Q8BTI8	64	64	64	Serine/arginine repetitive matrix protein 2	Srrm2	sp|Q8BTI8|SRRM2_MOUSE Serine/arginine repetitive matrix protein 2 OS=Mus musculus GN=Srrm2 PE=1 SV=3	1	64	64	64	53	56	44	49	45	46	34	38	37	29	38	33	53	56	44	49	45	46	34	38	37	29	38	33	53	56	44	49	45	46	34	38	37	29	38	33	34.3	34.3
Q9CW03	Q9CW03	64	64	64	Structural maintenance of chromosomes protein 3	Smc3	sp|Q9CW03|SMC3_MOUSE Structural maintenance of chromosomes protein 3 OS=Mus musculus GN=Smc3 PE=1 SV=2	1	64	64	64	52	52	44	48	51	50	28	33	27	28	35	28	52	52	44	48	51	50	28	33	27	28	35	28	52	52	44	48	51	50	28	33	27	28	35	28	50.3	50.3
Q9WTQ5	Q9WTQ5	64	64	64	A-kinase anchor protein 12	Akap12	sp|Q9WTQ5|AKA12_MOUSE A-kinase anchor protein 12 OS=Mus musculus GN=Akap12 PE=1 SV=1	1	64	64	64	56	59	49	59	52	47	19	14	11	10	9	11	56	59	49	59	52	47	19	14	11	10	9	11	56	59	49	59	52	47	19	14	11	10	9	11	55.4	55.4
Q8BTM8;Q8VHX6;Q80X90	Q8BTM8	63;3;2	63;3;2	63;3;2	Filamin-A	Flna	sp|Q8BTM8|FLNA_MOUSE Filamin-A OS=Mus musculus GN=Flna PE=1 SV=5	3	63	63	63	52	54	48	50	48	43	24	16	16	17	19	19	52	54	48	50	48	43	24	16	16	17	19	19	52	54	48	50	48	43	24	16	16	17	19	19	34.6	34.6
Q8CIH5	Q8CIH5	62	62	61	1-phosphatidylinositol 4,5-bisphosphate phosphodiesterase gamma-2	Plcg2	sp|Q8CIH5|PLCG2_MOUSE 1-phosphatidylinositol 4,5-bisphosphate phosphodiesterase gamma-2 OS=Mus musculus GN=Plcg2 PE=1 SV=1	1	62	62	61	53	53	48	52	52	52	32	32	30	25	35	44	53	53	48	52	52	52	32	32	30	25	35	44	52	52	47	51	51	51	31	31	29	24	34	43	57.5	57.5
Q6PDI5	Q6PDI5	61	61	61	Proteasome-associated protein ECM29 homolog	Ecm29	sp|Q6PDI5|ECM29_MOUSE Proteasome-associated protein ECM29 homolog OS=Mus musculus GN=Ecm29 PE=1 SV=3	1	61	61	61	50	53	49	51	50	51	33	32	24	27	38	37	50	53	49	51	50	51	33	32	24	27	38	37	50	53	49	51	50	51	33	32	24	27	38	37	44.8	44.8
Q8K2Z4	Q8K2Z4	61	61	60	Condensin complex subunit 1	Ncapd2	sp|Q8K2Z4|CND1_MOUSE Condensin complex subunit 1 OS=Mus musculus GN=Ncapd2 PE=1 SV=2	1	61	61	60	48	51	46	53	48	45	43	45	41	39	41	43	48	51	46	53	48	45	43	45	41	39	41	43	48	51	46	53	48	45	43	45	41	39	41	43	55.9	55.9
Q9JIK5	Q9JIK5	61	61	61	Nucleolar RNA helicase 2	Ddx21	sp|Q9JIK5|DDX21_MOUSE Nucleolar RNA helicase 2 OS=Mus musculus GN=Ddx21 PE=1 SV=3	1	61	61	61	53	57	47	53	48	52	39	36	40	36	33	34	53	57	47	53	48	52	39	36	40	36	33	34	53	57	47	53	48	52	39	36	40	36	33	34	68.9	68.9
Q8BMJ2	Q8BMJ2	60	60	60	Leucine--tRNA ligase, cytoplasmic	Lars	sp|Q8BMJ2|SYLC_MOUSE Leucine--tRNA ligase, cytoplasmic OS=Mus musculus GN=Lars PE=1 SV=2	1	60	60	60	52	53	47	50	49	50	37	36	34	31	37	41	52	53	47	50	49	50	37	36	34	31	37	41	52	53	47	50	49	50	37	36	34	31	37	41	57.3	57.3
Q91ZW3;Q6PGB8	Q91ZW3	60;15	60;15	60;15	SWI/SNF-related matrix-associated actin-dependent regulator of chromatin subfamily A member 5	Smarca5	sp|Q91ZW3|SMCA5_MOUSE SWI/SNF-related matrix-associated actin-dependent regulator of chromatin subfamily A member 5 OS=Mus musculus GN=Smarca5 PE=1 SV=1	2	60	60	60	48	49	44	47	42	42	37	38	38	31	37	39	48	49	44	47	42	42	37	38	38	31	37	39	48	49	44	47	42	42	37	38	38	31	37	39	54.4	54.4
P00520	P00520	59	59	54	Tyrosine-protein kinase ABL1	Abl1	sp|P00520|ABL1_MOUSE Tyrosine-protein kinase ABL1 OS=Mus musculus GN=Abl1 PE=1 SV=3	1	59	59	54	46	50	37	51	47	45	38	36	29	26	38	38	46	50	37	51	47	45	38	36	29	26	38	38	41	45	32	46	42	40	35	33	27	24	35	35	61.7	61.7
P57780;Q7TPR4;Q9JI91	P57780	59;19;12	59;19;12	50;10;4	Alpha-actinin-4	Actn4	sp|P57780|ACTN4_MOUSE Alpha-actinin-4 OS=Mus musculus GN=Actn4 PE=1 SV=1	3	59	59	50	55	52	53	54	49	54	25	24	27	19	25	26	55	52	53	54	49	54	25	24	27	19	25	26	46	45	46	45	42	45	22	23	24	16	24	24	71.3	71.3
Q5SWU9;E9Q4Z2	Q5SWU9	59;4	59;4	59;4	Acetyl-CoA carboxylase 1;Biotin carboxylase	Acaca	sp|Q5SWU9|ACACA_MOUSE Acetyl-CoA carboxylase 1 OS=Mus musculus GN=Acaca PE=1 SV=1	2	59	59	59	43	42	45	45	42	49	22	23	21	16	24	22	43	42	45	45	42	49	22	23	21	16	24	22	43	42	45	45	42	49	22	23	21	16	24	22	33.6	33.6
Q61595	Q61595	59	59	59	Kinectin	Ktn1	sp|Q61595|KTN1_MOUSE Kinectin OS=Mus musculus GN=Ktn1 PE=1 SV=1	1	59	59	59	48	43	36	43	48	51	29	31	23	24	34	35	48	43	36	43	48	51	29	31	23	24	34	35	48	43	36	43	48	51	29	31	23	24	34	35	50	50
Q6PB66	Q6PB66	59	59	59	Leucine-rich PPR motif-containing protein, mitochondrial	Lrpprc	sp|Q6PB66|LPPRC_MOUSE Leucine-rich PPR motif-containing protein, mitochondrial OS=Mus musculus GN=Lrpprc PE=1 SV=2	1	59	59	59	54	52	53	54	53	52	27	29	20	20	22	23	54	52	53	54	53	52	27	29	20	20	22	23	54	52	53	54	53	52	27	29	20	20	22	23	51	51
P25206	P25206	58	58	58	DNA replication licensing factor MCM3	Mcm3	sp|P25206|MCM3_MOUSE DNA replication licensing factor MCM3 OS=Mus musculus GN=Mcm3 PE=1 SV=2	1	58	58	58	52	51	48	49	50	51	42	33	33	24	34	38	52	51	48	49	50	51	42	33	33	24	34	38	52	51	48	49	50	51	42	33	33	24	34	38	72.3	72.3
Q01853	Q01853	58	58	58	Transitional endoplasmic reticulum ATPase	Vcp	sp|Q01853|TERA_MOUSE Transitional endoplasmic reticulum ATPase OS=Mus musculus GN=Vcp PE=1 SV=4	1	58	58	58	49	52	51	53	52	53	29	25	20	20	25	22	49	52	51	53	52	53	29	25	20	20	25	22	49	52	51	53	52	53	29	25	20	20	25	22	75.7	75.7
Q3TLH4	Q3TLH4	58	58	56	Protein PRRC2C	Prrc2c	sp|Q3TLH4|PRC2C_MOUSE Protein PRRC2C OS=Mus musculus GN=Prrc2c PE=1 SV=3	1	58	58	56	46	47	35	47	43	42	27	27	24	19	30	28	46	47	35	47	43	42	27	27	24	19	30	28	45	45	35	45	42	41	26	26	23	19	28	27	25.7	25.7
Q61879	Q61879	84	58	57	Myosin-10	Myh10	sp|Q61879|MYH10_MOUSE Myosin-10 OS=Mus musculus GN=Myh10 PE=1 SV=2	1	84	58	57	47	45	45	41	72	73	27	31	29	23	46	49	23	21	22	18	50	49	11	13	12	9	27	31	22	21	21	18	49	49	11	12	12	9	26	30	43.4	34.1
Q6NZJ6	Q6NZJ6	58	58	53	Eukaryotic translation initiation factor 4 gamma 1	Eif4g1	sp|Q6NZJ6|IF4G1_MOUSE Eukaryotic translation initiation factor 4 gamma 1 OS=Mus musculus GN=Eif4g1 PE=1 SV=1	1	58	58	53	52	49	45	49	45	47	26	29	24	21	30	31	52	49	45	49	45	47	26	29	24	21	30	31	47	44	40	44	40	42	22	25	21	19	26	26	36.5	36.5
Q3V3R1	Q3V3R1	57	57	56	Monofunctional C1-tetrahydrofolate synthase, mitochondrial	Mthfd1l	sp|Q3V3R1|C1TM_MOUSE Monofunctional C1-tetrahydrofolate synthase, mitochondrial OS=Mus musculus GN=Mthfd1l PE=1 SV=2	1	57	57	56	45	46	45	42	40	40	28	28	21	18	24	28	45	46	45	42	40	40	28	28	21	18	24	28	45	45	45	41	40	40	28	28	21	18	24	28	74.7	74.7
Q99104	Q99104	57	57	52	Unconventional myosin-Va	Myo5a	sp|Q99104|MYO5A_MOUSE Unconventional myosin-Va OS=Mus musculus GN=Myo5a PE=1 SV=2	1	57	57	52	54	50	39	49	39	37	27	24	24	22	26	27	54	50	39	49	39	37	27	24	24	22	26	27	49	47	35	44	36	34	26	22	22	20	23	25	32.6	32.6
Q9D0E1;Q91VC4	Q9D0E1	57;1	57;1	56;1	Heterogeneous nuclear ribonucleoprotein M	Hnrnpm	sp|Q9D0E1|HNRPM_MOUSE Heterogeneous nuclear ribonucleoprotein M OS=Mus musculus GN=Hnrnpm PE=1 SV=3	2	57	57	56	49	53	38	49	50	48	26	34	31	30	33	36	49	53	38	49	50	48	26	34	31	30	33	36	49	53	38	49	50	48	26	34	31	30	33	36	73.3	73.3
Q9EPU0	Q9EPU0	57	57	57	Regulator of nonsense transcripts 1	Upf1	sp|Q9EPU0|RENT1_MOUSE Regulator of nonsense transcripts 1 OS=Mus musculus GN=Upf1 PE=1 SV=2	1	57	57	57	53	52	48	50	52	52	40	41	35	33	42	37	53	52	48	50	52	52	40	41	35	33	42	37	53	52	48	50	52	52	40	41	35	33	42	37	59.6	59.6
P09405	P09405	56	56	56	Nucleolin	Ncl	sp|P09405|NUCL_MOUSE Nucleolin OS=Mus musculus GN=Ncl PE=1 SV=2	1	56	56	56	52	51	43	47	47	47	40	45	43	45	44	41	52	51	43	47	47	47	40	45	43	45	44	41	52	51	43	47	47	47	40	45	43	45	44	41	55.6	55.6
P08775	P08775	55	55	55	DNA-directed RNA polymerase II subunit RPB1	Polr2a	sp|P08775|RPB1_MOUSE DNA-directed RNA polymerase II subunit RPB1 OS=Mus musculus GN=Polr2a PE=1 SV=3	1	55	55	55	42	44	43	42	44	48	21	24	20	22	24	26	42	44	43	42	44	48	21	24	20	22	24	26	42	44	43	42	44	48	21	24	20	22	24	26	37	37
Q05D44	Q05D44	55	55	55	Eukaryotic translation initiation factor 5B	Eif5b	sp|Q05D44|IF2P_MOUSE Eukaryotic translation initiation factor 5B OS=Mus musculus GN=Eif5b PE=1 SV=2	1	55	55	55	43	43	40	42	43	42	34	35	35	30	32	32	43	43	40	42	43	42	34	35	35	30	32	32	43	43	40	42	43	42	34	35	35	30	32	32	46.8	46.8
Q5XG71	Q5XG71	55	55	55	Small subunit processome component 20 homolog	Utp20	sp|Q5XG71|UTP20_MOUSE Small subunit processome component 20 homolog OS=Mus musculus GN=Utp20 PE=1 SV=2	1	55	55	55	45	46	45	48	40	36	28	32	24	27	26	25	45	46	45	48	40	36	28	32	24	27	26	25	45	46	45	48	40	36	28	32	24	27	26	25	25.2	25.2
Q80TP3	Q80TP3	55	55	55	E3 ubiquitin-protein ligase UBR5	Ubr5	sp|Q80TP3|UBR5_MOUSE E3 ubiquitin-protein ligase UBR5 OS=Mus musculus GN=Ubr5 PE=1 SV=2	1	55	55	55	41	43	35	41	41	40	22	19	20	14	15	20	41	43	35	41	41	40	22	19	20	14	15	20	41	43	35	41	41	40	22	19	20	14	15	20	23.9	23.9
P14733	P14733	54	54	48	Lamin-B1	Lmnb1	sp|P14733|LMNB1_MOUSE Lamin-B1 OS=Mus musculus GN=Lmnb1 PE=1 SV=3	1	54	54	48	46	50	44	49	50	50	33	36	26	27	38	34	46	50	44	49	50	50	33	36	26	27	38	34	41	45	39	44	45	44	30	32	23	24	32	31	70.4	70.4
P37913	P37913	54	54	54	DNA ligase 1	Lig1	sp|P37913|DNLI1_MOUSE DNA ligase 1 OS=Mus musculus GN=Lig1 PE=1 SV=2	1	54	54	54	49	50	47	48	46	49	30	32	27	26	37	32	49	50	47	48	46	49	30	32	27	26	37	32	49	50	47	48	46	49	30	32	27	26	37	32	61.1	61.1
P40201	P40201	54	54	48	Chromodomain-helicase-DNA-binding protein 1	Chd1	sp|P40201|CHD1_MOUSE Chromodomain-helicase-DNA-binding protein 1 OS=Mus musculus GN=Chd1 PE=1 SV=3	1	54	54	48	40	42	43	42	40	38	34	31	29	29	29	29	40	42	43	42	40	38	34	31	29	29	29	29	34	37	37	36	34	32	31	26	26	24	26	26	36.2	36.2
Q02053	Q02053	54	54	43	Ubiquitin-like modifier-activating enzyme 1	Uba1	sp|Q02053|UBA1_MOUSE Ubiquitin-like modifier-activating enzyme 1 OS=Mus musculus GN=Uba1 PE=1 SV=1	1	54	54	43	47	48	44	51	48	46	33	31	30	27	38	35	47	48	44	51	48	46	33	31	30	27	38	35	37	38	34	40	37	36	24	23	21	20	29	28	67.3	67.3
Q6NS46	Q6NS46	54	54	54	Protein RRP5 homolog	Pdcd11	sp|Q6NS46|RRP5_MOUSE Protein RRP5 homolog OS=Mus musculus GN=Pdcd11 PE=1 SV=2	1	54	54	54	36	38	33	39	35	31	26	29	30	30	24	24	36	38	33	39	35	31	26	29	30	30	24	24	36	38	33	39	35	31	26	29	30	30	24	24	35.7	35.7
Q8CAQ8	Q8CAQ8	54	54	54	MICOS complex subunit Mic60	Immt	sp|Q8CAQ8|MIC60_MOUSE MICOS complex subunit Mic60 OS=Mus musculus GN=Immt PE=1 SV=1	1	54	54	54	51	47	35	45	45	45	35	32	31	31	26	36	51	47	35	45	45	45	35	32	31	31	26	36	51	47	35	45	45	45	35	32	31	31	26	36	70.9	70.9
Q9WTI7;O88329	Q9WTI7	54;1	54;1	54;1	Unconventional myosin-Ic	Myo1c	sp|Q9WTI7|MYO1C_MOUSE Unconventional myosin-Ic OS=Mus musculus GN=Myo1c PE=1 SV=2	2	54	54	54	48	51	48	49	47	46	28	27	28	25	37	32	48	51	48	49	47	46	28	27	28	25	37	32	48	51	48	49	47	46	28	27	28	25	37	32	54.8	54.8
Q9Z1Q9	Q9Z1Q9	54	54	54	Valine--tRNA ligase	Vars	sp|Q9Z1Q9|SYVC_MOUSE Valine--tRNA ligase OS=Mus musculus GN=Vars PE=1 SV=1	1	54	54	54	50	45	48	48	50	48	28	29	23	28	34	32	50	45	48	48	50	48	28	29	23	28	34	32	50	45	48	48	50	48	28	29	23	28	34	32	53.4	53.4
P08113	P08113	55	53	53	Endoplasmin	Hsp90b1	sp|P08113|ENPL_MOUSE Endoplasmin OS=Mus musculus GN=Hsp90b1 PE=1 SV=2	1	55	53	53	54	54	50	53	50	52	34	38	30	28	31	33	52	52	48	51	48	50	33	37	29	27	30	32	52	52	48	51	48	50	33	37	29	27	30	32	63	60.8
P20152;P15331;P03995;P46660;P08551	P20152	53;5;3;1;1	53;5;3;1;1	47;3;1;0;0	Vimentin	Vim	sp|P20152|VIME_MOUSE Vimentin OS=Mus musculus GN=Vim PE=1 SV=3	5	53	53	47	46	45	41	44	47	48	36	32	35	33	40	40	46	45	41	44	47	48	36	32	35	33	40	40	42	40	38	39	42	43	32	28	31	29	35	35	84.8	84.8
P54276	P54276	53	53	53	DNA mismatch repair protein Msh6	Msh6	sp|P54276|MSH6_MOUSE DNA mismatch repair protein Msh6 OS=Mus musculus GN=Msh6 PE=1 SV=3	1	53	53	53	44	44	41	39	45	45	32	34	25	21	35	33	44	44	41	39	45	45	32	34	25	21	35	33	44	44	41	39	45	45	32	34	25	21	35	33	49.3	49.3
Q8BU30	Q8BU30	53	53	53	Isoleucine--tRNA ligase, cytoplasmic	Iars	sp|Q8BU30|SYIC_MOUSE Isoleucine--tRNA ligase, cytoplasmic OS=Mus musculus GN=Iars PE=1 SV=2	1	53	53	53	44	44	44	40	43	45	37	38	27	26	36	32	44	44	44	40	43	45	37	38	27	26	36	32	44	44	44	40	43	45	37	38	27	26	36	32	49.1	49.1
Q99PL5	Q99PL5	53	53	53	Ribosome-binding protein 1	Rrbp1	sp|Q99PL5|RRBP1_MOUSE Ribosome-binding protein 1 OS=Mus musculus GN=Rrbp1 PE=1 SV=2	1	53	53	53	39	40	35	41	39	42	33	37	30	27	33	31	39	40	35	41	39	42	33	37	30	27	33	31	39	40	35	41	39	42	33	37	30	27	33	31	46.9	46.9
Q9R0L6	Q9R0L6	53	53	53	Pericentriolar material 1 protein	Pcm1	sp|Q9R0L6|PCM1_MOUSE Pericentriolar material 1 protein OS=Mus musculus GN=Pcm1 PE=1 SV=2	1	53	53	53	41	38	36	38	33	30	24	26	26	24	28	27	41	38	36	38	33	30	24	26	26	24	28	27	41	38	36	38	33	30	24	26	26	24	28	27	32.4	32.4
P33174	P33174	52	52	51	Chromosome-associated kinesin KIF4	Kif4	sp|P33174|KIF4_MOUSE Chromosome-associated kinesin KIF4 OS=Mus musculus GN=Kif4 PE=1 SV=3	1	52	52	51	40	42	34	38	41	40	33	40	30	29	37	34	40	42	34	38	41	40	33	40	30	29	37	34	39	41	33	37	40	39	32	39	29	28	36	33	54.4	54.4
P70388	P70388	52	52	52	DNA repair protein RAD50	Rad50	sp|P70388|RAD50_MOUSE DNA repair protein RAD50 OS=Mus musculus GN=Rad50 PE=1 SV=1	1	52	52	52	38	37	29	37	32	35	26	26	26	18	31	27	38	37	29	37	32	35	26	26	26	18	31	27	38	37	29	37	32	35	26	26	26	18	31	27	41.8	41.8
Q6A026	Q6A026	52	52	47	Sister chromatid cohesion protein PDS5 homolog A	Pds5a	sp|Q6A026|PDS5A_MOUSE Sister chromatid cohesion protein PDS5 homolog A OS=Mus musculus GN=Pds5a PE=1 SV=3	1	52	52	47	42	44	41	39	42	43	33	30	24	23	29	31	42	44	41	39	42	43	33	30	24	23	29	31	38	39	37	34	37	38	29	26	21	21	26	27	48.7	48.7
Q9JIX8	Q9JIX8	52	52	52	Apoptotic chromatin condensation inducer in the nucleus	Acin1	sp|Q9JIX8|ACINU_MOUSE Apoptotic chromatin condensation inducer in the nucleus OS=Mus musculus GN=Acin1 PE=1 SV=3	1	52	52	52	35	36	29	35	35	35	33	38	29	27	31	35	35	36	29	35	35	35	33	38	29	27	31	35	35	36	29	35	35	35	33	38	29	27	31	35	47.2	47.2
P26041	P26041	51	51	37	Moesin	Msn	sp|P26041|MOES_MOUSE Moesin OS=Mus musculus GN=Msn PE=1 SV=3	1	51	51	37	49	47	45	46	48	46	10	9	11	10	14	12	49	47	45	46	48	46	10	9	11	10	14	12	35	34	32	34	35	34	7	5	8	6	9	8	68.1	68.1
Q09XV5	Q09XV5	51	51	41	Chromodomain-helicase-DNA-binding protein 8	Chd8	sp|Q09XV5|CHD8_MOUSE Chromodomain-helicase-DNA-binding protein 8 OS=Mus musculus GN=Chd8 PE=1 SV=1	1	51	51	41	40	36	36	33	40	36	27	27	19	23	30	27	40	36	36	33	40	36	27	27	19	23	30	27	31	28	28	24	31	27	22	20	15	17	23	23	23.4	23.4
Q80TV8	Q80TV8	51	51	46	CLIP-associating protein 1	Clasp1	sp|Q80TV8|CLAP1_MOUSE CLIP-associating protein 1 OS=Mus musculus GN=Clasp1 PE=1 SV=2	1	51	51	46	38	42	36	40	32	36	26	29	27	31	29	25	38	42	36	40	32	36	26	29	27	31	29	25	35	39	33	37	29	33	23	26	22	26	25	21	38.6	38.6
Q99NB9	Q99NB9	51	51	51	Splicing factor 3B subunit 1	Sf3b1	sp|Q99NB9|SF3B1_MOUSE Splicing factor 3B subunit 1 OS=Mus musculus GN=Sf3b1 PE=1 SV=1	1	51	51	51	44	46	43	47	45	45	29	27	21	21	25	25	44	46	43	47	45	45	29	27	21	21	25	25	44	46	43	47	45	45	29	27	21	21	25	25	50.2	50.2
O70133	O70133	50	50	50	ATP-dependent RNA helicase A	Dhx9	sp|O70133|DHX9_MOUSE ATP-dependent RNA helicase A OS=Mus musculus GN=Dhx9 PE=1 SV=2	1	50	50	50	46	44	36	42	43	44	32	32	31	28	30	31	46	44	36	42	43	44	32	32	31	28	30	31	46	44	36	42	43	44	32	32	31	28	30	31	46.2	46.2
P49025	P49025	50	50	50	Citron Rho-interacting kinase	Cit	sp|P49025|CTRO_MOUSE Citron Rho-interacting kinase OS=Mus musculus GN=Cit PE=1 SV=3	1	50	50	50	37	32	27	33	39	39	27	23	19	16	21	22	37	32	27	33	39	39	27	23	19	16	21	22	37	32	27	33	39	39	27	23	19	16	21	22	27.7	27.7
P63017	P63017	50	50	37	Heat shock cognate 71 kDa protein	Hspa8	sp|P63017|HSP7C_MOUSE Heat shock cognate 71 kDa protein OS=Mus musculus GN=Hspa8 PE=1 SV=1	1	50	50	37	43	44	40	42	43	45	33	34	32	28	34	36	43	44	40	42	43	45	33	34	32	28	34	36	30	31	30	29	31	32	22	24	22	19	24	26	70.7	70.7
P97496	P97496	50	50	39	SWI/SNF complex subunit SMARCC1	Smarcc1	sp|P97496|SMRC1_MOUSE SWI/SNF complex subunit SMARCC1 OS=Mus musculus GN=Smarcc1 PE=1 SV=2	1	50	50	39	40	36	33	39	38	42	31	29	27	28	30	30	40	36	33	39	38	42	31	29	27	28	30	30	31	27	25	30	30	32	25	24	21	22	24	24	48.7	48.7
Q569Z5	Q569Z5	50	50	50	Probable ATP-dependent RNA helicase DDX46	Ddx46	sp|Q569Z5|DDX46_MOUSE Probable ATP-dependent RNA helicase DDX46 OS=Mus musculus GN=Ddx46 PE=1 SV=2	1	50	50	50	40	44	35	41	36	36	35	31	24	20	30	29	40	44	35	41	36	36	35	31	24	20	30	29	40	44	35	41	36	36	35	31	24	20	30	29	47	47
Q9Z103	Q9Z103	50	50	50	Activity-dependent neuroprotector homeobox protein	Adnp	sp|Q9Z103|ADNP_MOUSE Activity-dependent neuroprotector homeobox protein OS=Mus musculus GN=Adnp PE=1 SV=2	1	50	50	50	39	41	40	38	34	34	26	27	23	16	25	23	39	41	40	38	34	34	26	27	23	16	25	23	39	41	40	38	34	34	26	27	23	16	25	23	52.3	52.3
P97311	P97311	49	49	49	DNA replication licensing factor MCM6	Mcm6	sp|P97311|MCM6_MOUSE DNA replication licensing factor MCM6 OS=Mus musculus GN=Mcm6 PE=1 SV=1	1	49	49	49	42	42	39	42	43	45	31	35	32	28	35	34	42	42	39	42	43	45	31	35	32	28	35	34	42	42	39	42	43	45	31	35	32	28	35	34	65.5	65.5
Q5SUA5;Q5SYD0	Q5SUA5	49;2	49;2	49;2	Unconventional myosin-Ig	Myo1g	sp|Q5SUA5|MYO1G_MOUSE Unconventional myosin-Ig OS=Mus musculus GN=Myo1g PE=1 SV=1	2	49	49	49	45	46	43	46	42	42	30	31	33	26	30	35	45	46	43	46	42	42	30	31	33	26	30	35	45	46	43	46	42	42	30	31	33	26	30	35	58.1	58.1
Q6P9P6	Q6P9P6	49	49	49	Kinesin-like protein KIF11	Kif11	sp|Q6P9P6|KIF11_MOUSE Kinesin-like protein KIF11 OS=Mus musculus GN=Kif11 PE=1 SV=1	1	49	49	49	41	44	37	41	40	39	34	35	29	29	36	38	41	44	37	41	40	39	34	35	29	29	36	38	41	44	37	41	40	39	34	35	29	29	36	38	52.9	52.9
Q6ZQ58	Q6ZQ58	49	49	49	La-related protein 1	Larp1	sp|Q6ZQ58|LARP1_MOUSE La-related protein 1 OS=Mus musculus GN=Larp1 PE=1 SV=3	1	49	49	49	41	41	32	41	35	39	30	26	21	21	26	20	41	41	32	41	35	39	30	26	21	21	26	20	41	41	32	41	35	39	30	26	21	21	26	20	59.2	59.2
Q78PY7	Q78PY7	49	49	49	Staphylococcal nuclease domain-containing protein 1	Snd1	sp|Q78PY7|SND1_MOUSE Staphylococcal nuclease domain-containing protein 1 OS=Mus musculus GN=Snd1 PE=1 SV=1	1	49	49	49	44	44	38	43	39	41	33	31	27	28	34	34	44	44	38	43	39	41	33	31	27	28	34	34	44	44	38	43	39	41	33	31	27	28	34	34	63	63
Q8C7R4	Q8C7R4	49	49	49	Ubiquitin-like modifier-activating enzyme 6	Uba6	sp|Q8C7R4|UBA6_MOUSE Ubiquitin-like modifier-activating enzyme 6 OS=Mus musculus GN=Uba6 PE=1 SV=1	1	49	49	49	42	37	33	36	43	42	22	16	18	15	26	30	42	37	33	36	43	42	22	16	18	15	26	30	42	37	33	36	43	42	22	16	18	15	26	30	54.5	54.5
Q8VDJ3	Q8VDJ3	49	49	49	Vigilin	Hdlbp	sp|Q8VDJ3|VIGLN_MOUSE Vigilin OS=Mus musculus GN=Hdlbp PE=1 SV=1	1	49	49	49	40	40	36	38	36	39	22	26	18	18	24	22	40	40	36	38	36	39	22	26	18	18	24	22	40	40	36	38	36	39	22	26	18	18	24	22	44.1	44.1
Q99PU8	Q99PU8	49	49	49	Putative ATP-dependent RNA helicase DHX30	Dhx30	sp|Q99PU8|DHX30_MOUSE Putative ATP-dependent RNA helicase DHX30 OS=Mus musculus GN=Dhx30 PE=1 SV=1	1	49	49	49	36	36	39	35	33	32	22	21	16	15	21	15	36	36	39	35	33	32	22	21	16	15	21	15	36	36	39	35	33	32	22	21	16	15	21	15	49.1	49.1
Q9QX47	Q9QX47	49	49	49	Protein SON	Son	sp|Q9QX47|SON_MOUSE Protein SON OS=Mus musculus GN=Son PE=1 SV=2	1	49	49	49	38	41	35	40	32	37	27	26	27	23	19	23	38	41	35	40	32	37	27	26	27	23	19	23	38	41	35	40	32	37	27	26	27	23	19	23	30.2	30.2
P20029	P20029	50	48	48	78 kDa glucose-regulated protein	Hspa5	sp|P20029|GRP78_MOUSE 78 kDa glucose-regulated protein OS=Mus musculus GN=Hspa5 PE=1 SV=3	1	50	48	48	49	48	44	47	46	48	37	36	31	31	31	29	47	46	42	45	44	46	35	34	29	29	29	27	47	46	42	45	44	46	35	34	29	29	29	27	63.5	63.5
P63038	P63038	48	48	48	60 kDa heat shock protein, mitochondrial	Hspd1	sp|P63038|CH60_MOUSE 60 kDa heat shock protein, mitochondrial OS=Mus musculus GN=Hspd1 PE=1 SV=1	1	48	48	48	47	48	42	46	44	46	31	30	26	26	28	27	47	48	42	46	44	46	31	30	26	26	28	27	47	48	42	46	44	46	31	30	26	26	28	27	75.9	75.9
Q8BKC5;Q8BIV3	Q8BKC5	48;1	48;1	48;1	Importin-5	Ipo5	sp|Q8BKC5|IPO5_MOUSE Importin-5 OS=Mus musculus GN=Ipo5 PE=1 SV=3	2	48	48	48	44	43	40	41	44	40	23	22	22	17	24	25	44	43	40	41	44	40	23	22	22	17	24	25	44	43	40	41	44	40	23	22	22	17	24	25	68.3	68.3
Q922D8	Q922D8	49	48	48	C-1-tetrahydrofolate synthase, cytoplasmic;Methylenetetrahydrofolate dehydrogenase;Methenyltetrahydrofolate cyclohydrolase;Formyltetrahydrofolate synthetase;C-1-tetrahydrofolate synthase, cytoplasmic, N-terminally processed	Mthfd1	sp|Q922D8|C1TC_MOUSE C-1-tetrahydrofolate synthase, cytoplasmic OS=Mus musculus GN=Mthfd1 PE=1 SV=4	1	49	48	48	47	49	43	43	43	42	26	28	22	17	30	31	47	48	43	42	43	42	26	28	22	17	30	31	47	48	43	42	43	42	26	28	22	17	30	31	67.9	67.2
P52431	P52431	47	47	47	DNA polymerase delta catalytic subunit	Pold1	sp|P52431|DPOD1_MOUSE DNA polymerase delta catalytic subunit OS=Mus musculus GN=Pold1 PE=1 SV=2	1	47	47	47	38	38	38	40	41	43	26	30	18	18	23	24	38	38	38	40	41	43	26	30	18	18	23	24	38	38	38	40	41	43	26	30	18	18	23	24	54.3	54.3
Q61233;Q3V0K9	Q61233	47;2	47;2	42;1	Plastin-2	Lcp1	sp|Q61233|PLSL_MOUSE Plastin-2 OS=Mus musculus GN=Lcp1 PE=1 SV=4	2	47	47	42	42	44	39	41	42	43	27	28	18	22	24	25	42	44	39	41	42	43	27	28	18	22	24	25	37	39	35	36	37	38	22	23	13	18	20	21	83.7	83.7
Q8BSQ9	Q8BSQ9	47	47	47	Protein polybromo-1	Pbrm1	sp|Q8BSQ9|PB1_MOUSE Protein polybromo-1 OS=Mus musculus GN=Pbrm1 PE=1 SV=4	1	47	47	47	35	36	32	39	39	39	28	21	18	20	19	22	35	36	32	39	39	39	28	21	18	20	19	22	35	36	32	39	39	39	28	21	18	20	19	22	36.2	36.2
Q8CIE6	Q8CIE6	47	47	47	Coatomer subunit alpha;Xenin;Proxenin	Copa	sp|Q8CIE6|COPA_MOUSE Coatomer subunit alpha OS=Mus musculus GN=Copa PE=1 SV=2	1	47	47	47	41	42	36	40	44	42	29	27	27	22	29	26	41	42	36	40	44	42	29	27	27	22	29	26	41	42	36	40	44	42	29	27	27	22	29	26	49.8	49.8
Q8VDF2	Q8VDF2	47	47	45	E3 ubiquitin-protein ligase UHRF1	Uhrf1	sp|Q8VDF2|UHRF1_MOUSE E3 ubiquitin-protein ligase UHRF1 OS=Mus musculus GN=Uhrf1 PE=1 SV=2	1	47	47	45	39	39	33	41	41	41	34	34	31	31	36	36	39	39	33	41	41	41	34	34	31	31	36	36	37	38	32	39	40	39	33	33	31	30	35	35	71.4	71.4
Q8VEK3	Q8VEK3	47	47	47	Heterogeneous nuclear ribonucleoprotein U	Hnrnpu	sp|Q8VEK3|HNRPU_MOUSE Heterogeneous nuclear ribonucleoprotein U OS=Mus musculus GN=Hnrnpu PE=1 SV=1	1	47	47	47	44	41	35	36	41	40	30	32	26	25	28	29	44	41	35	36	41	40	30	32	26	25	28	29	44	41	35	36	41	40	30	32	26	25	28	29	54.4	54.4
O08810	O08810	47	46	46	116 kDa U5 small nuclear ribonucleoprotein component	Eftud2	sp|O08810|U5S1_MOUSE 116 kDa U5 small nuclear ribonucleoprotein component OS=Mus musculus GN=Eftud2 PE=1 SV=1	1	47	46	46	41	41	40	42	43	44	30	27	23	26	28	33	40	40	39	41	42	43	29	26	23	25	27	32	40	40	39	41	42	43	29	26	23	25	27	32	64.5	63.4
O88379	O88379	46	46	46	Bromodomain adjacent to zinc finger domain protein 1A	Baz1a	sp|O88379|BAZ1A_MOUSE Bromodomain adjacent to zinc finger domain protein 1A OS=Mus musculus GN=Baz1a PE=1 SV=3	1	46	46	46	32	32	30	29	33	33	27	29	22	18	24	23	32	32	30	29	33	33	27	29	22	18	24	23	32	32	30	29	33	33	27	29	22	18	24	23	35.4	35.4
P11103	P11103	46	46	46	Poly [ADP-ribose] polymerase 1	Parp1	sp|P11103|PARP1_MOUSE Poly [ADP-ribose] polymerase 1 OS=Mus musculus GN=Parp1 PE=1 SV=3	1	46	46	46	39	38	37	40	37	36	28	28	25	28	26	25	39	38	37	40	37	36	28	28	25	28	26	25	39	38	37	40	37	36	28	28	25	28	26	25	43	43
P35601	P35601	46	46	46	Replication factor C subunit 1	Rfc1	sp|P35601|RFC1_MOUSE Replication factor C subunit 1 OS=Mus musculus GN=Rfc1 PE=1 SV=2	1	46	46	46	36	32	33	37	35	35	30	25	25	24	25	26	36	32	33	37	35	35	30	25	25	24	25	26	36	32	33	37	35	35	30	25	25	24	25	26	48.8	48.8
Q61656	Q61656	46	46	37	Probable ATP-dependent RNA helicase DDX5	Ddx5	sp|Q61656|DDX5_MOUSE Probable ATP-dependent RNA helicase DDX5 OS=Mus musculus GN=Ddx5 PE=1 SV=2	1	46	46	37	41	44	36	41	39	40	33	34	33	27	34	36	41	44	36	41	39	40	33	34	33	27	34	36	33	35	28	33	31	31	26	27	25	21	28	29	64.8	64.8
Q61768;P28738	Q61768	46;10	46;10	36;1	Kinesin-1 heavy chain	Kif5b	sp|Q61768|KINH_MOUSE Kinesin-1 heavy chain OS=Mus musculus GN=Kif5b PE=1 SV=3	2	46	46	36	35	36	37	32	37	38	20	23	26	21	29	26	35	36	37	32	37	38	20	23	26	21	29	26	27	28	29	24	28	29	13	15	19	14	20	17	54.6	54.6
Q7TPH6	Q7TPH6	46	46	46	E3 ubiquitin-protein ligase MYCBP2	Mycbp2	sp|Q7TPH6|MYCB2_MOUSE E3 ubiquitin-protein ligase MYCBP2 OS=Mus musculus GN=Mycbp2 PE=1 SV=2	1	46	46	46	30	28	29	25	25	27	10	9	8	11	14	9	30	28	29	25	25	27	10	9	8	11	14	9	30	28	29	25	25	27	10	9	8	11	14	9	11.8	11.8
Q99KI0	Q99KI0	46	46	46	Aconitate hydratase, mitochondrial	Aco2	sp|Q99KI0|ACON_MOUSE Aconitate hydratase, mitochondrial OS=Mus musculus GN=Aco2 PE=1 SV=1	1	46	46	46	40	41	38	39	43	41	21	21	13	16	17	13	40	41	38	39	43	41	21	21	13	16	17	13	40	41	38	39	43	41	21	21	13	16	17	13	65.5	65.5
Q9JMH9	Q9JMH9	46	46	46	Unconventional myosin-XVIIIa	Myo18a	sp|Q9JMH9|MY18A_MOUSE Unconventional myosin-XVIIIa OS=Mus musculus GN=Myo18a PE=1 SV=2	1	46	46	46	35	37	30	34	38	31	12	13	11	12	14	19	35	37	30	34	38	31	12	13	11	12	14	19	35	37	30	34	38	31	12	13	11	12	14	19	25.4	25.4
P08003	P08003	45	45	44	Protein disulfide-isomerase A4	Pdia4	sp|P08003|PDIA4_MOUSE Protein disulfide-isomerase A4 OS=Mus musculus GN=Pdia4 PE=1 SV=3	1	45	45	44	43	42	34	40	40	42	12	8	15	8	13	10	43	42	34	40	40	42	12	8	15	8	13	10	42	41	33	39	39	41	12	8	15	8	13	10	64.1	64.1
P49717	P49717	45	45	44	DNA replication licensing factor MCM4	Mcm4	sp|P49717|MCM4_MOUSE DNA replication licensing factor MCM4 OS=Mus musculus GN=Mcm4 PE=1 SV=1	1	45	45	44	43	42	40	41	42	44	25	24	28	22	28	30	43	42	40	41	42	44	25	24	28	22	28	30	42	41	39	40	41	43	25	24	28	22	28	29	61.1	61.1
P52480;P53657	P52480	45;1	45;1	45;1	Pyruvate kinase PKM	Pkm	sp|P52480|KPYM_MOUSE Pyruvate kinase PKM OS=Mus musculus GN=Pkm PE=1 SV=4	2	45	45	45	41	42	40	41	40	38	27	30	28	27	31	28	41	42	40	41	40	38	27	30	28	27	31	28	41	42	40	41	40	38	27	30	28	27	31	28	76.5	76.5
Q1HFZ0	Q1HFZ0	45	45	45	tRNA (cytosine(34)-C(5))-methyltransferase	Nsun2	sp|Q1HFZ0|NSUN2_MOUSE tRNA (cytosine(34)-C(5))-methyltransferase OS=Mus musculus GN=Nsun2 PE=1 SV=2	1	45	45	45	41	37	36	40	39	36	27	22	17	20	21	23	41	37	36	40	39	36	27	22	17	20	21	23	41	37	36	40	39	36	27	22	17	20	21	23	75.4	75.4
Q3THK7	Q3THK7	45	45	45	GMP synthase [glutamine-hydrolyzing]	Gmps	sp|Q3THK7|GUAA_MOUSE GMP synthase [glutamine-hydrolyzing] OS=Mus musculus GN=Gmps PE=1 SV=2	1	45	45	45	31	31	30	30	35	32	27	21	21	13	27	24	31	31	30	30	35	32	27	21	21	13	27	24	31	31	30	30	35	32	27	21	21	13	27	24	72.7	72.7
Q64737	Q64737	45	45	45	Trifunctional purine biosynthetic protein adenosine-3;Phosphoribosylamine--glycine ligase;Phosphoribosylformylglycinamidine cyclo-ligase;Phosphoribosylglycinamide formyltransferase	Gart	sp|Q64737|PUR2_MOUSE Trifunctional purine biosynthetic protein adenosine-3 OS=Mus musculus GN=Gart PE=1 SV=3	1	45	45	45	41	42	38	43	41	40	27	27	23	18	32	29	41	42	38	43	41	40	27	27	23	18	32	29	41	42	38	43	41	40	27	27	23	18	32	29	63.7	63.7
Q8C147;Q8R1A4	Q8C147	45;1	45;1	45;1	Dedicator of cytokinesis protein 8	Dock8	sp|Q8C147|DOCK8_MOUSE Dedicator of cytokinesis protein 8 OS=Mus musculus GN=Dock8 PE=1 SV=4	2	45	45	45	37	35	32	36	37	39	20	21	17	14	25	23	37	35	32	36	37	39	20	21	17	14	25	23	37	35	32	36	37	39	20	21	17	14	25	23	26.6	26.6
Q91V92	Q91V92	45	45	45	ATP-citrate synthase	Acly	sp|Q91V92|ACLY_MOUSE ATP-citrate synthase OS=Mus musculus GN=Acly PE=1 SV=1	1	45	45	45	39	33	35	37	39	40	26	20	22	15	25	26	39	33	35	37	39	40	26	20	22	15	25	26	39	33	35	37	39	40	26	20	22	15	25	26	48.7	48.7
Q922S4	Q922S4	45	45	45	cGMP-dependent 3,5-cyclic phosphodiesterase	Pde2a	sp|Q922S4|PDE2A_MOUSE cGMP-dependent 3,5-cyclic phosphodiesterase OS=Mus musculus GN=Pde2a PE=1 SV=3	1	45	45	45	41	38	38	41	37	37	25	25	21	25	24	24	41	38	38	41	37	37	25	25	21	25	24	24	41	38	38	41	37	37	25	25	21	25	24	24	65.8	65.8
Q9JL26;A2APV2	Q9JL26	45;2	45;2	45;2	Formin-like protein 1	Fmnl1	sp|Q9JL26|FMNL1_MOUSE Formin-like protein 1 OS=Mus musculus GN=Fmnl1 PE=1 SV=1	2	45	45	45	39	37	39	35	38	38	20	24	19	18	25	27	39	37	39	35	38	38	20	24	19	18	25	27	39	37	39	35	38	38	20	24	19	18	25	27	41.7	41.7
Q9QY81	Q9QY81	45	45	45	Nuclear pore membrane glycoprotein 210	Nup210	sp|Q9QY81|PO210_MOUSE Nuclear pore membrane glycoprotein 210 OS=Mus musculus GN=Nup210 PE=1 SV=2	1	45	45	45	37	39	37	34	38	38	22	25	16	16	14	24	37	39	37	34	38	38	22	25	16	16	14	24	37	39	37	34	38	38	22	25	16	16	14	24	34.7	34.7
O88738;REV__Q5NCS9;REV__O88738	O88738	44;1;1	44;1;1	44;1;1	Baculoviral IAP repeat-containing protein 6	Birc6	sp|O88738|BIRC6_MOUSE Baculoviral IAP repeat-containing protein 6 OS=Mus musculus GN=Birc6 PE=1 SV=2	3	44	44	44	38	33	30	33	34	36	16	17	15	18	20	19	38	33	30	33	34	36	16	17	15	18	20	19	38	33	30	33	34	36	16	17	15	18	20	19	14.2	14.2
P97310	P97310	44	44	44	DNA replication licensing factor MCM2	Mcm2	sp|P97310|MCM2_MOUSE DNA replication licensing factor MCM2 OS=Mus musculus GN=Mcm2 PE=1 SV=3	1	44	44	44	38	40	38	35	35	37	26	26	21	11	27	28	38	40	38	35	35	37	26	26	21	11	27	28	38	40	38	35	35	37	26	26	21	11	27	28	55.3	55.3
Q3U7R1	Q3U7R1	44	44	44	Extended synaptotagmin-1	Esyt1	sp|Q3U7R1|ESYT1_MOUSE Extended synaptotagmin-1 OS=Mus musculus GN=Esyt1 PE=1 SV=2	1	44	44	44	41	39	38	39	34	34	24	25	23	20	22	19	41	39	38	39	34	34	24	25	23	20	22	19	41	39	38	39	34	34	24	25	23	20	22	19	47.4	47.4
Q8BX17	Q8BX17	44	44	44	Gem-associated protein 5	Gemin5	sp|Q8BX17|GEMI5_MOUSE Gem-associated protein 5 OS=Mus musculus GN=Gemin5 PE=1 SV=2	1	44	44	44	38	39	32	40	28	28	20	19	23	19	16	17	38	39	32	40	28	28	20	19	23	19	16	17	38	39	32	40	28	28	20	19	23	19	16	17	40.9	40.9
Q9WVF7	Q9WVF7	44	44	44	DNA polymerase epsilon catalytic subunit A	Pole	sp|Q9WVF7|DPOE1_MOUSE DNA polymerase epsilon catalytic subunit A OS=Mus musculus GN=Pole PE=1 SV=3	1	44	44	44	33	33	25	29	34	32	19	14	12	14	15	16	33	33	25	29	34	32	19	14	12	14	15	16	33	33	25	29	34	32	19	14	12	14	15	16	25.8	25.8
P35564	P35564	43	43	43	Calnexin	Canx	sp|P35564|CALX_MOUSE Calnexin OS=Mus musculus GN=Canx PE=1 SV=1	1	43	43	43	38	39	30	42	31	36	13	11	14	12	14	15	38	39	30	42	31	36	13	11	14	12	14	15	38	39	30	42	31	36	13	11	14	12	14	15	56.2	56.2
Q62383	Q62383	43	43	43	Transcription elongation factor SPT6	Supt6h	sp|Q62383|SPT6H_MOUSE Transcription elongation factor SPT6 OS=Mus musculus GN=Supt6h PE=1 SV=2	1	43	43	43	34	33	25	31	30	33	10	10	5	8	18	17	34	33	25	31	30	33	10	10	5	8	18	17	34	33	25	31	30	33	10	10	5	8	18	17	30.9	30.9
P06800	P06800	42	42	42	Receptor-type tyrosine-protein phosphatase C	Ptprc	sp|P06800|PTPRC_MOUSE Receptor-type tyrosine-protein phosphatase C OS=Mus musculus GN=Ptprc PE=1 SV=3	1	42	42	42	37	37	33	33	33	38	11	15	9	8	15	11	37	37	33	33	33	38	11	15	9	8	15	11	37	37	33	33	33	38	11	15	9	8	15	11	32.2	32.2
P42932	P42932	42	42	42	T-complex protein 1 subunit theta	Cct8	sp|P42932|TCPQ_MOUSE T-complex protein 1 subunit theta OS=Mus musculus GN=Cct8 PE=1 SV=3	1	42	42	42	38	37	33	36	35	38	27	28	19	19	28	28	38	37	33	36	35	38	27	28	19	19	28	28	38	37	33	36	35	38	27	28	19	19	28	28	79.4	79.4
P80314	P80314	42	42	42	T-complex protein 1 subunit beta	Cct2	sp|P80314|TCPB_MOUSE T-complex protein 1 subunit beta OS=Mus musculus GN=Cct2 PE=1 SV=4	1	42	42	42	39	40	36	39	40	40	23	26	22	19	27	27	39	40	36	39	40	40	23	26	22	19	27	27	39	40	36	39	40	40	23	26	22	19	27	27	84.5	84.5
Q3TKT4;Q6DIC0	Q3TKT4	42;14	42;14	42;14	Transcription activator BRG1	Smarca4	sp|Q3TKT4|SMCA4_MOUSE Transcription activator BRG1 OS=Mus musculus GN=Smarca4 PE=1 SV=1	2	42	42	42	31	32	29	34	31	32	22	26	25	18	24	28	31	32	29	34	31	32	22	26	25	18	24	28	31	32	29	34	31	32	22	26	25	18	24	28	33.2	33.2
Q64514	Q64514	42	42	42	Tripeptidyl-peptidase 2	Tpp2	sp|Q64514|TPP2_MOUSE Tripeptidyl-peptidase 2 OS=Mus musculus GN=Tpp2 PE=1 SV=3	1	42	42	42	35	32	35	35	34	33	15	14	16	12	14	17	35	32	35	35	34	33	15	14	16	12	14	17	35	32	35	35	34	33	15	14	16	12	14	17	45	45
Q6ZQ38	Q6ZQ38	42	42	41	Cullin-associated NEDD8-dissociated protein 1	Cand1	sp|Q6ZQ38|CAND1_MOUSE Cullin-associated NEDD8-dissociated protein 1 OS=Mus musculus GN=Cand1 PE=1 SV=2	1	42	42	41	37	37	33	36	31	36	20	21	14	18	19	20	37	37	33	36	31	36	20	21	14	18	19	20	36	36	32	35	30	35	19	20	13	17	18	19	40.1	40.1
Q70FJ1	Q70FJ1	42	42	42	A-kinase anchor protein 9	Akap9	sp|Q70FJ1|AKAP9_MOUSE A-kinase anchor protein 9 OS=Mus musculus GN=Akap9 PE=1 SV=2	1	42	42	42	29	31	31	28	24	24	24	17	25	13	23	22	29	31	31	28	24	24	24	17	25	13	23	22	29	31	31	28	24	24	24	17	25	13	23	22	14	14
Q8VDN2;Q6PIE5;Q6PIC6;Q64436	Q8VDN2	42;13;12;4	42;13;12;4	35;6;5;1	Sodium/potassium-transporting ATPase subunit alpha-1	Atp1a1	sp|Q8VDN2|AT1A1_MOUSE Sodium/potassium-transporting ATPase subunit alpha-1 OS=Mus musculus GN=Atp1a1 PE=1 SV=1	4	42	42	35	37	36	30	35	37	32	25	22	19	16	18	20	37	36	30	35	37	32	25	22	19	16	18	20	32	30	24	29	31	26	21	19	16	16	17	18	44.5	44.5
Q99MR6	Q99MR6	42	42	42	Serrate RNA effector molecule homolog	Srrt	sp|Q99MR6|SRRT_MOUSE Serrate RNA effector molecule homolog OS=Mus musculus GN=Srrt PE=1 SV=1	1	42	42	42	37	33	29	37	36	33	25	17	22	13	23	18	37	33	29	37	36	33	25	17	22	13	23	18	37	33	29	37	36	33	25	17	22	13	23	18	41.3	41.3
Q9D2V7	Q9D2V7	42	42	42	Coronin-7	Coro7	sp|Q9D2V7|CORO7_MOUSE Coronin-7 OS=Mus musculus GN=Coro7 PE=1 SV=2	1	42	42	42	35	37	32	35	34	38	25	21	14	13	19	26	35	37	32	35	34	38	25	21	14	13	19	26	35	37	32	35	34	38	25	21	14	13	19	26	67.4	67.4
L0N7N1	L0N7N1	41	41	41	Kinesin-like protein KIF14	Kif14	sp|L0N7N1|KIF14_MOUSE Kinesin-like protein KIF14 OS=Mus musculus GN=Kif14 PE=1 SV=1	1	41	41	41	29	24	21	28	27	29	23	20	20	16	23	25	29	24	21	28	27	29	23	20	20	16	23	25	29	24	21	28	27	29	23	20	20	16	23	25	31.2	31.2
P07742	P07742	41	41	41	Ribonucleoside-diphosphate reductase large subunit	Rrm1	sp|P07742|RIR1_MOUSE Ribonucleoside-diphosphate reductase large subunit OS=Mus musculus GN=Rrm1 PE=1 SV=2	1	41	41	41	37	36	34	35	37	39	20	21	19	15	22	26	37	36	34	35	37	39	20	21	19	15	22	26	37	36	34	35	37	39	20	21	19	15	22	26	69.6	69.6
P38647	P38647	41	41	41	Stress-70 protein, mitochondrial	Hspa9	sp|P38647|GRP75_MOUSE Stress-70 protein, mitochondrial OS=Mus musculus GN=Hspa9 PE=1 SV=3	1	41	41	41	38	39	32	38	37	38	24	23	26	24	25	27	38	39	32	38	37	38	24	23	26	24	25	27	38	39	32	38	37	38	24	23	26	24	25	27	62.9	62.9
P49718	P49718	41	41	41	DNA replication licensing factor MCM5	Mcm5	sp|P49718|MCM5_MOUSE DNA replication licensing factor MCM5 OS=Mus musculus GN=Mcm5 PE=1 SV=1	1	41	41	41	36	35	31	36	34	36	20	24	19	19	23	25	36	35	31	36	34	36	20	24	19	19	23	25	36	35	31	36	34	36	20	24	19	19	23	25	62.1	62.1
P70227	P70227	41	41	36	Inositol 1,4,5-trisphosphate receptor type 3	Itpr3	sp|P70227|ITPR3_MOUSE Inositol 1,4,5-trisphosphate receptor type 3 OS=Mus musculus GN=Itpr3 PE=1 SV=3	1	41	41	36	34	32	29	30	33	32	14	12	13	10	15	13	34	32	29	30	33	32	14	12	13	10	15	13	30	28	24	27	30	28	11	10	11	9	13	10	20.5	20.5
P70398	P70398	41	41	41	Probable ubiquitin carboxyl-terminal hydrolase FAF-X	Usp9x	sp|P70398|USP9X_MOUSE Probable ubiquitin carboxyl-terminal hydrolase FAF-X OS=Mus musculus GN=Usp9x PE=1 SV=2	1	41	41	41	32	31	24	34	30	32	14	13	13	5	24	18	32	31	24	34	30	32	14	13	13	5	24	18	32	31	24	34	30	32	14	13	13	5	24	18	18.6	18.6
Q569Z6	Q569Z6	41	41	40	Thyroid hormone receptor-associated protein 3	Thrap3	sp|Q569Z6|TR150_MOUSE Thyroid hormone receptor-associated protein 3 OS=Mus musculus GN=Thrap3 PE=1 SV=1	1	41	41	40	33	35	30	33	32	32	27	30	24	22	29	30	33	35	30	33	32	32	27	30	24	22	29	30	32	34	29	32	31	31	26	29	24	21	28	29	34.5	34.5
Q61316	Q61316	41	41	38	Heat shock 70 kDa protein 4	Hspa4	sp|Q61316|HSP74_MOUSE Heat shock 70 kDa protein 4 OS=Mus musculus GN=Hspa4 PE=1 SV=1	1	41	41	38	39	38	33	37	39	39	19	19	14	16	27	24	39	38	33	37	39	39	19	19	14	16	27	24	36	35	32	35	36	36	18	18	13	15	25	22	57.8	57.8
Q6PFD9	Q6PFD9	41	41	41	Nuclear pore complex protein Nup98-Nup96;Nuclear pore complex protein Nup98;Nuclear pore complex protein Nup96	Nup98	sp|Q6PFD9|NUP98_MOUSE Nuclear pore complex protein Nup98-Nup96 OS=Mus musculus GN=Nup98 PE=1 SV=2	1	41	41	41	33	30	36	34	34	31	9	10	7	5	12	9	33	30	36	34	34	31	9	10	7	5	12	9	33	30	36	34	34	31	9	10	7	5	12	9	31.5	31.5
Q80UM3	Q80UM3	41	41	39	N-alpha-acetyltransferase 15, NatA auxiliary subunit	Naa15	sp|Q80UM3|NAA15_MOUSE N-alpha-acetyltransferase 15, NatA auxiliary subunit OS=Mus musculus GN=Naa15 PE=1 SV=1	1	41	41	39	35	36	28	34	29	35	21	20	17	15	20	20	35	36	28	34	29	35	21	20	17	15	20	20	33	34	26	32	28	33	19	19	16	14	18	18	43.7	43.7
Q8BGQ7	Q8BGQ7	41	41	41	Alanine--tRNA ligase, cytoplasmic	Aars	sp|Q8BGQ7|SYAC_MOUSE Alanine--tRNA ligase, cytoplasmic OS=Mus musculus GN=Aars PE=1 SV=1	1	41	41	41	37	36	28	36	37	38	19	18	18	16	19	22	37	36	28	36	37	38	19	18	18	16	19	22	37	36	28	36	37	38	19	18	18	16	19	22	57	57
Q8VDM4	Q8VDM4	41	41	41	26S proteasome non-ATPase regulatory subunit 2	Psmd2	sp|Q8VDM4|PSMD2_MOUSE 26S proteasome non-ATPase regulatory subunit 2 OS=Mus musculus GN=Psmd2 PE=1 SV=1	1	41	41	41	38	37	34	35	35	35	21	22	20	14	27	28	38	37	34	35	35	35	21	22	20	14	27	28	38	37	34	35	35	35	21	22	20	14	27	28	56.6	56.6
Q9D0I9	Q9D0I9	41	41	41	Arginine--tRNA ligase, cytoplasmic	Rars	sp|Q9D0I9|SYRC_MOUSE Arginine--tRNA ligase, cytoplasmic OS=Mus musculus GN=Rars PE=1 SV=2	1	41	41	41	34	33	33	35	35	35	22	23	18	19	26	21	34	33	33	35	35	35	22	23	18	19	26	21	34	33	33	35	35	35	22	23	18	19	26	21	58.6	58.6
Q9JIF7	Q9JIF7	41	41	41	Coatomer subunit beta	Copb1	sp|Q9JIF7|COPB_MOUSE Coatomer subunit beta OS=Mus musculus GN=Copb1 PE=1 SV=1	1	41	41	41	35	33	33	34	32	32	22	18	18	14	22	24	35	33	33	34	32	32	22	18	18	14	22	24	35	33	33	34	32	32	22	18	18	14	22	24	51.5	51.5
E9Q5G3	E9Q5G3	40	40	40	Kinesin-like protein KIF23	Kif23	sp|E9Q5G3|KIF23_MOUSE Kinesin-like protein KIF23 OS=Mus musculus GN=Kif23 PE=1 SV=1	1	40	40	40	30	34	24	30	31	31	23	23	22	20	28	27	30	34	24	30	31	31	23	23	22	20	28	27	30	34	24	30	31	31	23	23	22	20	28	27	51	51
O70318;Q9Z2H5	O70318	40;1	40;1	37;0	Band 4.1-like protein 2	Epb41l2	sp|O70318|E41L2_MOUSE Band 4.1-like protein 2 OS=Mus musculus GN=Epb41l2 PE=1 SV=2	2	40	40	37	34	34	28	27	32	31	19	19	13	15	20	18	34	34	28	27	32	31	19	19	13	15	20	18	31	31	26	25	29	28	16	17	10	13	18	16	49.1	49.1
Q6P5E4	Q6P5E4	40	40	40	UDP-glucose:glycoprotein glucosyltransferase 1	Uggt1	sp|Q6P5E4|UGGG1_MOUSE UDP-glucose:glycoprotein glucosyltransferase 1 OS=Mus musculus GN=Uggt1 PE=1 SV=4	1	40	40	40	37	38	35	36	34	32	18	14	10	11	17	16	37	38	35	36	34	32	18	14	10	11	17	16	37	38	35	36	34	32	18	14	10	11	17	16	32.9	32.9
Q8C2K5	Q8C2K5	40	40	40	RAS protein activator like-3	Rasal3	sp|Q8C2K5|RASL3_MOUSE RAS protein activator like-3 OS=Mus musculus GN=Rasal3 PE=1 SV=1	1	40	40	40	32	31	27	31	30	31	19	17	17	18	18	15	32	31	27	31	30	31	19	17	17	18	18	15	32	31	27	31	30	31	19	17	17	18	18	15	44.6	44.6
Q8CGF7	Q8CGF7	40	40	39	Transcription elongation regulator 1	Tcerg1	sp|Q8CGF7|TCRG1_MOUSE Transcription elongation regulator 1 OS=Mus musculus GN=Tcerg1 PE=1 SV=2	1	40	40	39	34	33	31	31	32	35	17	17	6	6	18	18	34	33	31	31	32	35	17	17	6	6	18	18	33	32	30	30	31	34	17	17	6	6	17	17	32.6	32.6
Q99MK8;Q3UYH7	Q99MK8	40;8	40;8	40;8	Beta-adrenergic receptor kinase 1	Adrbk1	sp|Q99MK8|ARBK1_MOUSE Beta-adrenergic receptor kinase 1 OS=Mus musculus GN=Grk2 PE=1 SV=2	2	40	40	40	35	35	31	34	35	34	20	24	14	18	25	22	35	35	31	34	35	34	20	24	14	18	25	22	35	35	31	34	35	34	20	24	14	18	25	22	57.8	57.8
Q9R190	Q9R190	40	40	33	Metastasis-associated protein MTA2	Mta2	sp|Q9R190|MTA2_MOUSE Metastasis-associated protein MTA2 OS=Mus musculus GN=Mta2 PE=1 SV=1	1	40	40	33	25	31	28	30	26	26	21	26	27	22	27	27	25	31	28	30	26	26	21	26	27	22	27	27	21	27	23	26	22	22	17	21	22	18	23	22	58.4	58.4
A2AUM9	A2AUM9	39	39	38	Centrosomal protein of 152 kDa	Cep152	sp|A2AUM9|CE152_MOUSE Centrosomal protein of 152 kDa OS=Mus musculus GN=Cep152 PE=1 SV=1	1	39	39	38	22	23	17	21	21	24	15	12	8	12	13	17	22	23	17	21	21	24	15	12	8	12	13	17	21	22	16	20	20	23	15	12	8	12	13	16	26.4	26.4
G5E870	G5E870	39	39	39	E3 ubiquitin-protein ligase TRIP12	Trip12	sp|G5E870|TRIPC_MOUSE E3 ubiquitin-protein ligase TRIP12 OS=Mus musculus GN=Trip12 PE=1 SV=1	1	39	39	39	23	25	26	25	22	24	22	22	25	18	24	23	23	25	26	25	22	24	22	22	25	18	24	23	23	25	26	25	22	24	22	22	25	18	24	23	27.1	27.1
P05213;Q3UX10	P05213	39;4	39;4	0;0	Tubulin alpha-1B chain	Tuba1b	sp|P05213|TBA1B_MOUSE Tubulin alpha-1B chain OS=Mus musculus GN=Tuba1b PE=1 SV=2	2	39	39	0	38	36	37	36	36	37	27	26	28	23	28	28	38	36	37	36	36	37	27	26	28	23	28	28	0	0	0	0	0	0	0	0	0	0	0	0	86	86
P16406	P16406	39	39	39	Glutamyl aminopeptidase	Enpep	sp|P16406|AMPE_MOUSE Glutamyl aminopeptidase OS=Mus musculus GN=Enpep PE=1 SV=1	1	39	39	39	33	36	29	34	35	33	13	15	15	12	16	16	33	36	29	34	35	33	13	15	15	12	16	16	33	36	29	34	35	33	13	15	15	12	16	16	43	43
P27773	P27773	40	39	39	Protein disulfide-isomerase A3	Pdia3	sp|P27773|PDIA3_MOUSE Protein disulfide-isomerase A3 OS=Mus musculus GN=Pdia3 PE=1 SV=2	1	40	39	39	38	38	36	38	38	35	13	7	16	16	13	14	37	37	35	37	37	34	13	7	16	16	13	14	37	37	35	37	37	34	13	7	16	16	13	14	72.5	69.5
Q3TXS7	Q3TXS7	39	39	39	26S proteasome non-ATPase regulatory subunit 1	Psmd1	sp|Q3TXS7|PSMD1_MOUSE 26S proteasome non-ATPase regulatory subunit 1 OS=Mus musculus GN=Psmd1 PE=1 SV=1	1	39	39	39	36	33	28	29	35	34	19	21	20	14	26	25	36	33	28	29	35	34	19	21	20	14	26	25	36	33	28	29	35	34	19	21	20	14	26	25	49.3	49.3
Q3U1J4	Q3U1J4	39	39	39	DNA damage-binding protein 1	Ddb1	sp|Q3U1J4|DDB1_MOUSE DNA damage-binding protein 1 OS=Mus musculus GN=Ddb1 PE=1 SV=2	1	39	39	39	32	32	30	27	29	33	17	18	16	12	20	15	32	32	30	27	29	33	17	18	16	12	20	15	32	32	30	27	29	33	17	18	16	12	20	15	39.7	39.7
Q62167;P16381	Q62167;P16381	40;32	39;31	10;5	ATP-dependent RNA helicase DDX3X;Putative ATP-dependent RNA helicase Pl10	Ddx3x;D1Pas1	sp|Q62167|DDX3X_MOUSE ATP-dependent RNA helicase DDX3X OS=Mus musculus GN=Ddx3x PE=1 SV=3;sp|P16381|DDX3L_MOUSE Putative ATP-dependent RNA helicase Pl10 OS=Mus musculus GN=D1Pas1 PE=1 SV=1	2	40	39	10	33	30	26	31	32	36	29	26	25	23	24	26	32	29	25	30	31	35	28	25	24	22	23	25	8	7	5	8	7	8	6	6	6	6	6	6	65.3	65.3
Q8K310	Q8K310	39	39	39	Matrin-3	Matr3	sp|Q8K310|MATR3_MOUSE Matrin-3 OS=Mus musculus GN=Matr3 PE=1 SV=1	1	39	39	39	35	34	31	34	34	35	25	25	22	22	26	23	35	34	31	34	34	35	25	25	22	22	26	23	35	34	31	34	34	35	25	25	22	22	26	23	55	55
Q8VDP4	Q8VDP4	39	39	39	Cell cycle and apoptosis regulator protein 2	Ccar2	sp|Q8VDP4|CCAR2_MOUSE Cell cycle and apoptosis regulator protein 2 OS=Mus musculus GN=Ccar2 PE=1 SV=2	1	39	39	39	32	32	25	28	31	32	17	17	12	13	26	24	32	32	25	28	31	32	17	17	12	13	26	24	32	32	25	28	31	32	17	17	12	13	26	24	57.3	57.3
Q9ERK4	Q9ERK4	39	39	39	Exportin-2	Cse1l	sp|Q9ERK4|XPO2_MOUSE Exportin-2 OS=Mus musculus GN=Cse1l PE=1 SV=1	1	39	39	39	33	33	33	35	31	33	21	19	23	17	23	19	33	33	33	35	31	33	21	19	23	17	23	19	33	33	33	35	31	33	21	19	23	17	23	19	44.9	44.9
Q9QY06;Q8C170	Q9QY06	39;1	39;1	39;1	Unconventional myosin-IXb	Myo9b	sp|Q9QY06|MYO9B_MOUSE Unconventional myosin-IXb OS=Mus musculus GN=Myo9b PE=1 SV=2	2	39	39	39	24	25	27	24	23	24	19	17	16	11	20	13	24	25	27	24	23	24	19	17	16	11	20	13	24	25	27	24	23	24	19	17	16	11	20	13	25.4	25.4
A2AF47	A2AF47	38	38	38	Dedicator of cytokinesis protein 11	Dock11	sp|A2AF47|DOC11_MOUSE Dedicator of cytokinesis protein 11 OS=Mus musculus GN=Dock11 PE=1 SV=1	1	38	38	38	27	25	22	27	25	26	12	12	11	9	18	17	27	25	22	27	25	26	12	12	11	9	18	17	27	25	22	27	25	26	12	12	11	9	18	17	23.4	23.4
A2BH40	A2BH40	38	38	34	AT-rich interactive domain-containing protein 1A	Arid1a	sp|A2BH40|ARI1A_MOUSE AT-rich interactive domain-containing protein 1A OS=Mus musculus GN=Arid1a PE=1 SV=1	1	38	38	34	27	26	28	30	29	32	20	16	16	12	18	20	27	26	28	30	29	32	20	16	16	12	18	20	25	24	26	27	27	29	18	14	15	10	16	18	20.6	20.6
P10126;P62631	P10126	38;15	38;15	38;15	Elongation factor 1-alpha 1	Eef1a1	sp|P10126|EF1A1_MOUSE Elongation factor 1-alpha 1 OS=Mus musculus GN=Eef1a1 PE=1 SV=3	2	38	38	38	34	34	33	33	31	33	29	28	26	25	29	29	34	34	33	33	31	33	29	28	26	25	29	29	34	34	33	33	31	33	29	28	26	25	29	29	77.5	77.5
P29341	P29341	38	38	38	Polyadenylate-binding protein 1	Pabpc1	sp|P29341|PABP1_MOUSE Polyadenylate-binding protein 1 OS=Mus musculus GN=Pabpc1 PE=1 SV=2	1	38	38	38	35	35	31	33	35	34	26	23	26	21	31	28	35	35	31	33	35	34	26	23	26	21	31	28	35	35	31	33	35	34	26	23	26	21	31	28	61	61
P63260	P63260	38	38	1	Actin, cytoplasmic 2;Actin, cytoplasmic 2, N-terminally processed	Actg1	sp|P63260|ACTG_MOUSE Actin, cytoplasmic 2 OS=Mus musculus GN=Actg1 PE=1 SV=1	1	38	38	1	33	35	33	33	34	33	25	24	24	23	26	26	33	35	33	33	34	33	25	24	24	23	26	26	1	1	1	1	1	1	1	1	1	1	1	1	90.1	90.1
P80315	P80315	38	38	38	T-complex protein 1 subunit delta	Cct4	sp|P80315|TCPD_MOUSE T-complex protein 1 subunit delta OS=Mus musculus GN=Cct4 PE=1 SV=3	1	38	38	38	34	34	30	32	34	34	22	22	22	18	27	23	34	34	30	32	34	34	22	22	22	18	27	23	34	34	30	32	34	34	22	22	22	18	27	23	76.1	76.1
P80318	P80318	38	38	38	T-complex protein 1 subunit gamma	Cct3	sp|P80318|TCPG_MOUSE T-complex protein 1 subunit gamma OS=Mus musculus GN=Cct3 PE=1 SV=1	1	38	38	38	37	37	32	36	38	36	25	28	21	18	29	32	37	37	32	36	38	36	25	28	21	18	29	32	37	37	32	36	38	36	25	28	21	18	29	32	71.9	71.9
Q4VA53	Q4VA53	43	38	38	Sister chromatid cohesion protein PDS5 homolog B	Pds5b	sp|Q4VA53|PDS5B_MOUSE Sister chromatid cohesion protein PDS5 homolog B OS=Mus musculus GN=Pds5b PE=1 SV=1	1	43	38	38	33	35	31	34	33	33	25	25	21	17	26	27	29	30	27	29	28	28	21	21	18	15	23	23	29	30	27	29	28	28	21	21	18	15	23	23	34	30.6
Q5SQX6	Q5SQX6	38	38	23	Cytoplasmic FMR1-interacting protein 2	Cyfip2	sp|Q5SQX6|CYFP2_MOUSE Cytoplasmic FMR1-interacting protein 2 OS=Mus musculus GN=Cyfip2 PE=1 SV=2	1	38	38	23	34	34	31	31	36	31	20	15	11	12	16	20	34	34	31	31	36	31	20	15	11	12	16	20	21	21	17	19	22	20	11	8	5	7	6	13	36.2	36.2
Q60864	Q60864	38	38	38	Stress-induced-phosphoprotein 1	Stip1	sp|Q60864|STIP1_MOUSE Stress-induced-phosphoprotein 1 OS=Mus musculus GN=Stip1 PE=1 SV=1	1	38	38	38	35	34	27	33	33	34	16	18	13	17	25	21	35	34	27	33	33	34	16	18	13	17	25	21	35	34	27	33	33	34	16	18	13	17	25	21	57.5	57.5
Q61699	Q61699	41	38	38	Heat shock protein 105 kDa	Hsph1	sp|Q61699|HS105_MOUSE Heat shock protein 105 kDa OS=Mus musculus GN=Hsph1 PE=1 SV=2	1	41	38	38	37	38	32	37	35	36	19	21	15	17	25	20	34	35	31	35	32	33	18	20	14	16	23	18	34	35	31	35	32	33	18	20	14	16	23	18	61.4	57.8
Q68FL6	Q68FL6	38	38	38	Methionine--tRNA ligase, cytoplasmic	Mars	sp|Q68FL6|SYMC_MOUSE Methionine--tRNA ligase, cytoplasmic OS=Mus musculus GN=Mars PE=1 SV=1	1	38	38	38	31	32	30	31	32	34	25	23	17	15	26	23	31	32	30	31	32	34	25	23	17	15	26	23	31	32	30	31	32	34	25	23	17	15	26	23	48.9	48.9
Q6KCD5	Q6KCD5	38	38	38	Nipped-B-like protein	Nipbl	sp|Q6KCD5|NIPBL_MOUSE Nipped-B-like protein OS=Mus musculus GN=Nipbl PE=1 SV=1	1	38	38	38	30	29	27	30	26	28	20	15	19	16	22	22	30	29	27	30	26	28	20	15	19	16	22	22	30	29	27	30	26	28	20	15	19	16	22	22	16.7	16.7
Q6P5B0	Q6P5B0	38	38	38	RRP12-like protein	Rrp12	sp|Q6P5B0|RRP12_MOUSE RRP12-like protein OS=Mus musculus GN=Rrp12 PE=1 SV=1	1	38	38	38	31	30	26	29	28	27	23	22	21	19	24	20	31	30	26	29	28	27	23	22	21	19	24	20	31	30	26	29	28	27	23	22	21	19	24	20	34.8	34.8
Q6P5F9	Q6P5F9	38	38	38	Exportin-1	Xpo1	sp|Q6P5F9|XPO1_MOUSE Exportin-1 OS=Mus musculus GN=Xpo1 PE=1 SV=1	1	38	38	38	31	31	31	32	26	28	21	23	17	17	18	21	31	31	31	32	26	28	21	23	17	17	18	21	31	31	31	32	26	28	21	23	17	17	18	21	41.8	41.8
Q7TSC1	Q7TSC1	40	38	38	Protein PRRC2A	Prrc2a	sp|Q7TSC1|PRC2A_MOUSE Protein PRRC2A OS=Mus musculus GN=Prrc2a PE=1 SV=1	1	40	38	38	30	29	24	31	26	27	19	21	16	16	18	17	29	27	24	29	25	26	18	20	15	16	16	16	29	27	24	29	25	26	18	20	15	16	16	16	25.4	24.7
Q8BHN3	Q8BHN3	38	38	38	Neutral alpha-glucosidase AB	Ganab	sp|Q8BHN3|GANAB_MOUSE Neutral alpha-glucosidase AB OS=Mus musculus GN=Ganab PE=1 SV=1	1	38	38	38	34	34	33	37	35	34	3	1	2	2	5	5	34	34	33	37	35	34	3	1	2	2	5	5	34	34	33	37	35	34	3	1	2	2	5	5	54.6	54.6
Q8BI22	Q8BI22	38	38	38	Centrosomal protein of 128 kDa	Cep128	sp|Q8BI22|CE128_MOUSE Centrosomal protein of 128 kDa OS=Mus musculus GN=Cep128 PE=1 SV=2	1	38	38	38	25	28	19	23	24	28	21	20	17	16	24	20	25	28	19	23	24	28	21	20	17	16	24	20	25	28	19	23	24	28	21	20	17	16	24	20	37.5	37.5
Q8R1B4	Q8R1B4	38	38	38	Eukaryotic translation initiation factor 3 subunit C	Eif3c	sp|Q8R1B4|EIF3C_MOUSE Eukaryotic translation initiation factor 3 subunit C OS=Mus musculus GN=Eif3c PE=1 SV=1	1	38	38	38	33	32	27	28	31	29	20	20	19	15	21	20	33	32	27	28	31	29	20	20	19	15	21	20	33	32	27	28	31	29	20	20	19	15	21	20	43.7	43.7
Q91YR7	Q91YR7	38	38	38	Pre-mRNA-processing factor 6	Prpf6	sp|Q91YR7|PRP6_MOUSE Pre-mRNA-processing factor 6 OS=Mus musculus GN=Prpf6 PE=1 SV=1	1	38	38	38	34	26	28	33	32	31	21	19	16	14	24	22	34	26	28	33	32	31	21	19	16	14	24	22	34	26	28	33	32	31	21	19	16	14	24	22	44.2	44.2
Q922J3;Q9Z0H8	Q922J3	38;1	38;1	38;1	CAP-Gly domain-containing linker protein 1	Clip1	sp|Q922J3|CLIP1_MOUSE CAP-Gly domain-containing linker protein 1 OS=Mus musculus GN=Clip1 PE=1 SV=1	2	38	38	38	29	27	24	29	24	27	5	4	3	3	5	2	29	27	24	29	24	27	5	4	3	3	5	2	29	27	24	29	24	27	5	4	3	3	5	2	31.7	31.7
Q99PP2	Q99PP2	38	38	38	Zinc finger protein 318	Znf318	sp|Q99PP2|ZN318_MOUSE Zinc finger protein 318 (Fragment) OS=Mus musculus GN=Znf318 PE=1 SV=2	1	38	38	38	30	34	27	28	25	25	15	11	13	10	16	11	30	34	27	28	25	25	15	11	13	10	16	11	30	34	27	28	25	25	15	11	13	10	16	11	29	29
Q9JKR6	Q9JKR6	38	38	38	Hypoxia up-regulated protein 1	Hyou1	sp|Q9JKR6|HYOU1_MOUSE Hypoxia up-regulated protein 1 OS=Mus musculus GN=Hyou1 PE=1 SV=1	1	38	38	38	35	34	32	35	33	35	20	17	12	12	18	16	35	34	32	35	33	35	20	17	12	12	18	16	35	34	32	35	33	35	20	17	12	12	18	16	49.6	49.6
P56399	P56399	37	37	37	Ubiquitin carboxyl-terminal hydrolase 5	Usp5	sp|P56399|UBP5_MOUSE Ubiquitin carboxyl-terminal hydrolase 5 OS=Mus musculus GN=Usp5 PE=1 SV=1	1	37	37	37	34	33	29	32	34	34	18	16	19	19	23	23	34	33	29	32	34	34	18	16	19	19	23	23	34	33	29	32	34	34	18	16	19	19	23	23	53.8	53.8
P59328	P59328	37	37	37	WD repeat and HMG-box DNA-binding protein 1	Wdhd1	sp|P59328|WDHD1_MOUSE WD repeat and HMG-box DNA-binding protein 1 OS=Mus musculus GN=Wdhd1 PE=1 SV=2	1	37	37	37	35	32	30	31	31	32	12	14	11	6	11	17	35	32	30	31	31	32	12	14	11	6	11	17	35	32	30	31	31	32	12	14	11	6	11	17	43.2	43.2
P68372	P68372	37	37	2	Tubulin beta-4B chain	Tubb4b	sp|P68372|TBB4B_MOUSE Tubulin beta-4B chain OS=Mus musculus GN=Tubb4b PE=1 SV=1	1	37	37	2	35	36	36	32	37	35	25	24	24	23	25	26	35	36	36	32	37	35	25	24	24	23	25	26	2	2	2	2	2	2	1	1	1	1	2	2	84.7	84.7
Q61881	Q61881	37	37	37	DNA replication licensing factor MCM7	Mcm7	sp|Q61881|MCM7_MOUSE DNA replication licensing factor MCM7 OS=Mus musculus GN=Mcm7 PE=1 SV=1	1	37	37	37	33	35	32	32	34	34	24	25	19	16	28	25	33	35	32	32	34	34	24	25	19	16	28	25	33	35	32	32	34	34	24	25	19	16	28	25	61.1	61.1
Q62448	Q62448	37	37	37	Eukaryotic translation initiation factor 4 gamma 2	Eif4g2	sp|Q62448|IF4G2_MOUSE Eukaryotic translation initiation factor 4 gamma 2 OS=Mus musculus GN=Eif4g2 PE=1 SV=2	1	37	37	37	31	30	26	29	29	30	21	21	22	19	24	21	31	30	26	29	29	30	21	21	22	19	24	21	31	30	26	29	29	30	21	21	22	19	24	21	43.7	43.7
Q6A068	Q6A068	37	37	37	Cell division cycle 5-like protein	Cdc5l	sp|Q6A068|CDC5L_MOUSE Cell division cycle 5-like protein OS=Mus musculus GN=Cdc5l PE=1 SV=2	1	37	37	37	28	30	24	28	25	28	28	29	20	21	24	20	28	30	24	28	25	28	28	29	20	21	24	20	28	30	24	28	25	28	28	29	20	21	24	20	61.2	61.2
Q8CGY8	Q8CGY8	37	37	37	UDP-N-acetylglucosamine--peptide N-acetylglucosaminyltransferase 110 kDa subunit	Ogt	sp|Q8CGY8|OGT1_MOUSE UDP-N-acetylglucosamine--peptide N-acetylglucosaminyltransferase 110 kDa subunit OS=Mus musculus GN=Ogt PE=1 SV=2	1	37	37	37	31	31	28	27	32	33	17	17	12	9	24	25	31	31	28	27	32	33	17	17	12	9	24	25	31	31	28	27	32	33	17	17	12	9	24	25	45.4	45.4
Q8K363	Q8K363	37	37	37	ATP-dependent RNA helicase DDX18	Ddx18	sp|Q8K363|DDX18_MOUSE ATP-dependent RNA helicase DDX18 OS=Mus musculus GN=Ddx18 PE=1 SV=1	1	37	37	37	28	29	25	30	25	23	23	20	22	21	22	22	28	29	25	30	25	23	23	20	22	21	22	22	28	29	25	30	25	23	23	20	22	21	22	22	66.4	66.4
Q91W50	Q91W50	37	37	37	Cold shock domain-containing protein E1	Csde1	sp|Q91W50|CSDE1_MOUSE Cold shock domain-containing protein E1 OS=Mus musculus GN=Csde1 PE=1 SV=1	1	37	37	37	33	33	28	32	31	33	21	21	17	13	23	24	33	33	28	32	31	33	21	21	17	13	23	24	33	33	28	32	31	33	21	21	17	13	23	24	48.5	48.5
Q9CWJ9	Q9CWJ9	37	37	37	Bifunctional purine biosynthesis protein PURH;Phosphoribosylaminoimidazolecarboxamide formyltransferase;IMP cyclohydrolase	Atic	sp|Q9CWJ9|PUR9_MOUSE Bifunctional purine biosynthesis protein PURH OS=Mus musculus GN=Atic PE=1 SV=2	1	37	37	37	35	33	33	34	33	36	22	23	19	19	27	24	35	33	33	34	33	36	22	23	19	19	27	24	35	33	33	34	33	36	22	23	19	19	27	24	73.3	73.3
Q9WU78	Q9WU78	37	37	37	Programmed cell death 6-interacting protein	Pdcd6ip	sp|Q9WU78|PDC6I_MOUSE Programmed cell death 6-interacting protein OS=Mus musculus GN=Pdcd6ip PE=1 SV=3	1	37	37	37	32	31	28	29	28	30	17	19	13	17	24	19	32	31	28	29	28	30	17	19	13	17	24	19	32	31	28	29	28	30	17	19	13	17	24	19	45.5	45.5
Q9Z110	Q9Z110	37	37	37	Delta-1-pyrroline-5-carboxylate synthase;Glutamate 5-kinase;Gamma-glutamyl phosphate reductase	Aldh18a1	sp|Q9Z110|P5CS_MOUSE Delta-1-pyrroline-5-carboxylate synthase OS=Mus musculus GN=Aldh18a1 PE=1 SV=2	1	37	37	37	35	36	33	35	35	35	16	18	14	17	17	19	35	36	33	35	35	35	16	18	14	17	17	19	35	36	33	35	35	35	16	18	14	17	17	19	47.2	47.2
O88508;P0DOY1	O88508	36;3	36;3	34;1	DNA (cytosine-5)-methyltransferase 3A	Dnmt3a	sp|O88508|DNM3A_MOUSE DNA (cytosine-5)-methyltransferase 3A OS=Mus musculus GN=Dnmt3a PE=1 SV=2	2	36	36	34	26	26	19	25	29	29	20	19	15	19	17	17	26	26	19	25	29	29	20	19	15	19	17	17	25	24	17	23	27	27	18	17	14	17	15	15	43.5	43.5
O88569	O88569	36	36	35	Heterogeneous nuclear ribonucleoproteins A2/B1	Hnrnpa2b1	sp|O88569|ROA2_MOUSE Heterogeneous nuclear ribonucleoproteins A2/B1 OS=Mus musculus GN=Hnrnpa2b1 PE=1 SV=2	1	36	36	35	32	32	32	32	34	34	18	17	15	14	22	19	32	32	32	32	34	34	18	17	15	14	22	19	31	31	31	31	33	33	17	16	14	14	22	19	76.8	76.8
P40142	P40142	36	36	36	Transketolase	Tkt	sp|P40142|TKT_MOUSE Transketolase OS=Mus musculus GN=Tkt PE=1 SV=1	1	36	36	36	35	36	34	34	35	35	16	18	17	15	21	23	35	36	34	34	35	35	16	18	17	15	21	23	35	36	34	34	35	35	16	18	17	15	21	23	71.7	71.7
P43247	P43247	36	36	36	DNA mismatch repair protein Msh2	Msh2	sp|P43247|MSH2_MOUSE DNA mismatch repair protein Msh2 OS=Mus musculus GN=Msh2 PE=1 SV=1	1	36	36	36	33	34	27	27	33	30	24	22	19	19	23	21	33	34	27	27	33	30	24	22	19	19	23	21	33	34	27	27	33	30	24	22	19	19	23	21	46.5	46.5
P55937	P55937	36	36	36	Golgin subfamily A member 3	Golga3	sp|P55937|GOGA3_MOUSE Golgin subfamily A member 3 OS=Mus musculus GN=Golga3 PE=1 SV=3	1	36	36	36	33	28	27	29	30	28	5	5	2	0	6	6	33	28	27	29	30	28	5	5	2	0	6	6	33	28	27	29	30	28	5	5	2	0	6	6	33	33
P70168	P70168	36	36	36	Importin subunit beta-1	Kpnb1	sp|P70168|IMB1_MOUSE Importin subunit beta-1 OS=Mus musculus GN=Kpnb1 PE=1 SV=2	1	36	36	36	30	32	29	32	32	29	22	22	14	23	23	23	30	32	29	32	32	29	22	22	14	23	23	23	30	32	29	32	32	29	22	22	14	23	23	23	53.1	53.1
Q03265	Q03265	36	36	36	ATP synthase subunit alpha, mitochondrial	Atp5a1	sp|Q03265|ATPA_MOUSE ATP synthase subunit alpha, mitochondrial OS=Mus musculus GN=Atp5a1 PE=1 SV=1	1	36	36	36	35	32	28	32	30	30	16	21	19	20	21	21	35	32	28	32	30	30	16	21	19	20	21	21	35	32	28	32	30	30	16	21	19	20	21	21	61.5	61.5
Q04750;Q8R4U6	Q04750	36;2	36;2	36;2	DNA topoisomerase 1	Top1	sp|Q04750|TOP1_MOUSE DNA topoisomerase 1 OS=Mus musculus GN=Top1 PE=1 SV=2	2	36	36	36	29	29	27	27	27	27	25	23	22	21	26	25	29	29	27	27	27	27	25	23	22	21	26	25	29	29	27	27	27	27	25	23	22	21	26	25	46.5	46.5
Q3U0V1	Q3U0V1	36	36	33	Far upstream element-binding protein 2	Khsrp	sp|Q3U0V1|FUBP2_MOUSE Far upstream element-binding protein 2 OS=Mus musculus GN=Khsrp PE=1 SV=2	1	36	36	33	28	32	25	30	31	35	11	14	13	9	15	16	28	32	25	30	31	35	11	14	13	9	15	16	25	29	24	28	29	32	10	12	10	9	13	15	51.6	51.6
Q5SUR0	Q5SUR0	36	36	36	Phosphoribosylformylglycinamidine synthase	Pfas	sp|Q5SUR0|PUR4_MOUSE Phosphoribosylformylglycinamidine synthase OS=Mus musculus GN=Pfas PE=1 SV=1	1	36	36	36	32	29	27	35	28	29	8	9	6	6	9	7	32	29	27	35	28	29	8	9	6	6	9	7	32	29	27	35	28	29	8	9	6	6	9	7	48.8	48.8
Q62318	Q62318	36	36	36	Transcription intermediary factor 1-beta	Trim28	sp|Q62318|TIF1B_MOUSE Transcription intermediary factor 1-beta OS=Mus musculus GN=Trim28 PE=1 SV=3	1	36	36	36	30	30	29	30	30	31	21	24	21	20	26	21	30	30	29	30	30	31	21	24	21	20	26	21	30	30	29	30	30	31	21	24	21	20	26	21	60.2	60.2
Q6A0A9	Q6A0A9	36	36	34	Constitutive coactivator of PPAR-gamma-like protein 1	FAM120A	sp|Q6A0A9|F120A_MOUSE Constitutive coactivator of PPAR-gamma-like protein 1 OS=Mus musculus GN=FAM120A PE=1 SV=2	1	36	36	34	32	32	30	29	30	29	21	19	18	19	20	22	32	32	30	29	30	29	21	19	18	19	20	22	30	30	28	27	28	27	20	18	17	18	19	20	45.6	45.6
Q7TT37	Q7TT37	36	36	36	Elongator complex protein 1	Ikbkap	sp|Q7TT37|ELP1_MOUSE Elongator complex protein 1 OS=Mus musculus GN=Elp1 PE=1 SV=2	1	36	36	36	29	30	26	32	33	30	16	17	11	7	11	13	29	30	26	32	33	30	16	17	11	7	11	13	29	30	26	32	33	30	16	17	11	7	11	13	34.1	34.1
Q8BK67	Q8BK67	36	36	36	Protein RCC2	Rcc2	sp|Q8BK67|RCC2_MOUSE Protein RCC2 OS=Mus musculus GN=Rcc2 PE=1 SV=1	1	36	36	36	29	30	27	28	30	31	21	18	21	18	21	21	29	30	27	28	30	31	21	18	21	18	21	21	29	30	27	28	30	31	21	18	21	18	21	21	76.7	76.7
Q8K224	Q8K224	36	36	36	N-acetyltransferase 10	Nat10	sp|Q8K224|NAT10_MOUSE RNA cytidine acetyltransferase OS=Mus musculus GN=Nat10 PE=1 SV=1	1	36	36	36	26	25	23	25	24	22	29	27	25	18	25	21	26	25	23	25	24	22	29	27	25	18	25	21	26	25	23	25	24	22	29	27	25	18	25	21	40.4	40.4
Q8R418	Q8R418	36	36	36	Endoribonuclease Dicer	Dicer1	sp|Q8R418|DICER_MOUSE Endoribonuclease Dicer OS=Mus musculus GN=Dicer1 PE=1 SV=3	1	36	36	36	26	24	25	25	24	23	11	11	9	12	14	14	26	24	25	25	24	23	11	11	9	12	14	14	26	24	25	25	24	23	11	11	9	12	14	14	23	23
Q8VDD9	Q8VDD9	36	36	32	PH-interacting protein	Phip	sp|Q8VDD9|PHIP_MOUSE PH-interacting protein OS=Mus musculus GN=Phip PE=1 SV=2	1	36	36	32	25	25	22	27	21	18	23	23	24	18	20	22	25	25	22	27	21	18	23	23	24	18	20	22	22	23	21	25	20	17	20	20	21	16	18	18	24.4	24.4
Q8VIJ6	Q8VIJ6	36	36	34	Splicing factor, proline- and glutamine-rich	Sfpq	sp|Q8VIJ6|SFPQ_MOUSE Splicing factor, proline- and glutamine-rich OS=Mus musculus GN=Sfpq PE=1 SV=1	1	36	36	34	33	32	26	31	30	31	20	20	15	17	17	18	33	32	26	31	30	31	20	20	15	17	17	18	32	31	24	30	29	30	18	18	15	15	15	16	48.1	48.1
Q99LE6	Q99LE6	36	36	36	ATP-binding cassette sub-family F member 2	Abcf2	sp|Q99LE6|ABCF2_MOUSE ATP-binding cassette sub-family F member 2 OS=Mus musculus GN=Abcf2 PE=1 SV=1	1	36	36	36	33	30	31	31	30	31	23	20	16	20	23	23	33	30	31	31	30	31	23	20	16	20	23	23	33	30	31	31	30	31	23	20	16	20	23	23	51.8	51.8
Q9D6Z1	Q9D6Z1	36	36	36	Nucleolar protein 56	Nop56	sp|Q9D6Z1|NOP56_MOUSE Nucleolar protein 56 OS=Mus musculus GN=Nop56 PE=1 SV=2	1	36	36	36	30	32	32	33	30	33	26	24	21	20	28	27	30	32	32	33	30	33	26	24	21	20	28	27	30	32	32	33	30	33	26	24	21	20	28	27	69.7	69.7
Q9Z1F9	Q9Z1F9	36	36	36	SUMO-activating enzyme subunit 2	Uba2	sp|Q9Z1F9|SAE2_MOUSE SUMO-activating enzyme subunit 2 OS=Mus musculus GN=Uba2 PE=1 SV=1	1	36	36	36	30	33	27	33	31	31	16	17	13	7	21	21	30	33	27	33	31	31	16	17	13	7	21	21	30	33	27	33	31	31	16	17	13	7	21	21	64.7	64.7
E9Q3L2	E9Q3L2	35	35	35		Pi4ka	sp|E9Q3L2|PI4KA_MOUSE Phosphatidylinositol 4-kinase alpha OS=Mus musculus GN=Pi4ka PE=1 SV=2	1	35	35	35	26	26	26	26	22	24	14	12	13	11	15	15	26	26	26	26	22	24	14	12	13	11	15	15	26	26	26	26	22	24	14	12	13	11	15	15	19.5	19.5
P05064	P05064	35	35	27	Fructose-bisphosphate aldolase A	Aldoa	sp|P05064|ALDOA_MOUSE Fructose-bisphosphate aldolase A OS=Mus musculus GN=Aldoa PE=1 SV=2	1	35	35	27	33	34	27	31	32	32	18	14	17	13	17	19	33	34	27	31	32	32	18	14	17	13	17	19	27	27	24	25	26	26	14	11	12	11	14	14	81.3	81.3
P11983	P11983	35	35	35	T-complex protein 1 subunit alpha	Tcp1	sp|P11983|TCPA_MOUSE T-complex protein 1 subunit alpha OS=Mus musculus GN=Tcp1 PE=1 SV=3	1	35	35	35	30	30	31	27	30	31	25	20	18	16	24	22	30	30	31	27	30	31	25	20	18	16	24	22	30	30	31	27	30	31	25	20	18	16	24	22	73.4	73.4
Q08943	Q08943	35	35	35	FACT complex subunit SSRP1	Ssrp1	sp|Q08943|SSRP1_MOUSE FACT complex subunit SSRP1 OS=Mus musculus GN=Ssrp1 PE=1 SV=2	1	35	35	35	28	30	26	27	26	27	27	27	26	24	28	29	28	30	26	27	26	27	27	27	26	24	28	29	28	30	26	27	26	27	27	27	26	24	28	29	55.4	55.4
Q60597	Q60597	35	35	35	2-oxoglutarate dehydrogenase, mitochondrial	Ogdh	sp|Q60597|ODO1_MOUSE 2-oxoglutarate dehydrogenase, mitochondrial OS=Mus musculus GN=Ogdh PE=1 SV=3	1	35	35	35	28	29	31	31	28	30	10	9	8	7	10	10	28	29	31	31	28	30	10	9	8	7	10	10	28	29	31	31	28	30	10	9	8	7	10	10	41.4	41.4
Q60974	Q60974	35	35	32	Nuclear receptor corepressor 1	Ncor1	sp|Q60974|NCOR1_MOUSE Nuclear receptor corepressor 1 OS=Mus musculus GN=Ncor1 PE=1 SV=1	1	35	35	32	25	24	20	26	24	26	11	9	5	6	6	4	25	24	20	26	24	26	11	9	5	6	6	4	22	21	18	23	23	24	9	7	4	5	4	3	16.7	16.7
Q61191	Q61191	35	35	35	Host cell factor 1;HCF N-terminal chain 1;HCF N-terminal chain 2;HCF N-terminal chain 3;HCF N-terminal chain 4;HCF N-terminal chain 5;HCF N-terminal chain 6;HCF C-terminal chain 1;HCF C-terminal chain 2;HCF C-terminal chain 3;HCF C-terminal chain 4;HCF C-terminal chain 5;HCF C-terminal chain 6	Hcfc1	sp|Q61191|HCFC1_MOUSE Host cell factor 1 OS=Mus musculus GN=Hcfc1 PE=1 SV=2	1	35	35	35	29	30	28	33	30	32	17	16	15	9	17	16	29	30	28	33	30	32	17	16	15	9	17	16	29	30	28	33	30	32	17	16	15	9	17	16	23.4	23.4
Q6A4J8;REV__Q8BQP8	Q6A4J8	35;1	35;1	35;1	Ubiquitin carboxyl-terminal hydrolase 7	Usp7	sp|Q6A4J8|UBP7_MOUSE Ubiquitin carboxyl-terminal hydrolase 7 OS=Mus musculus GN=Usp7 PE=1 SV=1	2	35	35	35	30	29	30	29	30	33	19	16	14	14	20	17	30	29	30	29	30	33	19	16	14	14	20	17	30	29	30	29	30	33	19	16	14	14	20	17	36.8	36.8
Q80U72	Q80U72	35	35	33	Protein scribble homolog	Scrib	sp|Q80U72|SCRIB_MOUSE Protein scribble homolog OS=Mus musculus GN=Scrib PE=1 SV=2	1	35	35	33	30	28	27	27	33	31	12	11	10	8	15	14	30	28	27	27	33	31	12	11	10	8	15	14	28	26	26	25	31	29	10	9	8	6	13	12	34.9	34.9
Q8CDG3	Q8CDG3	35	35	35	Deubiquitinating protein VCIP135	Vcpip1	sp|Q8CDG3|VCIP1_MOUSE Deubiquitinating protein VCIP135 OS=Mus musculus GN=Vcpip1 PE=1 SV=1	1	35	35	35	26	28	24	24	20	29	13	9	7	6	11	10	26	28	24	24	20	29	13	9	7	6	11	10	26	28	24	24	20	29	13	9	7	6	11	10	36.1	36.1
Q8CI11	Q8CI11	35	35	34	Guanine nucleotide-binding protein-like 3	Gnl3	sp|Q8CI11|GNL3_MOUSE Guanine nucleotide-binding protein-like 3 OS=Mus musculus GN=Gnl3 PE=1 SV=2	1	35	35	34	32	32	27	30	33	30	25	26	23	21	24	24	32	32	27	30	33	30	25	26	23	21	24	24	31	31	26	29	32	29	24	25	22	20	23	23	59.5	59.5
Q8K019	Q8K019	36	35	35	Bcl-2-associated transcription factor 1	Bclaf1	sp|Q8K019|BCLF1_MOUSE Bcl-2-associated transcription factor 1 OS=Mus musculus GN=Bclaf1 PE=1 SV=2	1	36	35	35	32	33	24	31	30	32	24	19	26	19	25	22	31	32	23	30	29	31	23	18	26	18	24	21	31	32	23	30	29	31	23	18	26	18	24	21	42.4	41.2
Q8K411	Q8K411	35	35	35	Presequence protease, mitochondrial	Pitrm1	sp|Q8K411|PREP_MOUSE Presequence protease, mitochondrial OS=Mus musculus GN=Pitrm1 PE=1 SV=1	1	35	35	35	28	28	29	30	25	26	2	4	2	3	3	2	28	28	29	30	25	26	2	4	2	3	3	2	28	28	29	30	25	26	2	4	2	3	3	2	46.8	46.8
Q91VR5	Q91VR5	35	35	35	ATP-dependent RNA helicase DDX1	Ddx1	sp|Q91VR5|DDX1_MOUSE ATP-dependent RNA helicase DDX1 OS=Mus musculus GN=Ddx1 PE=1 SV=1	1	35	35	35	32	31	29	31	29	30	21	24	22	16	23	25	32	31	29	31	29	30	21	24	22	16	23	25	32	31	29	31	29	30	21	24	22	16	23	25	58.6	58.6
Q9CZD3	Q9CZD3	35	35	35	Glycine--tRNA ligase	Gars	sp|Q9CZD3|GARS_MOUSE Glycine--tRNA ligase OS=Mus musculus GN=Gars PE=1 SV=1	1	35	35	35	29	29	24	27	32	29	19	19	15	11	20	20	29	29	24	27	32	29	19	19	15	11	20	20	29	29	24	27	32	29	19	19	15	11	20	20	55.4	55.4
Q9QUR6	Q9QUR6	35	35	35	Prolyl endopeptidase	Prep	sp|Q9QUR6|PPCE_MOUSE Prolyl endopeptidase OS=Mus musculus GN=Prep PE=1 SV=1	1	35	35	35	33	33	27	33	31	34	20	17	17	13	23	20	33	33	27	33	31	34	20	17	17	13	23	20	33	33	27	33	31	34	20	17	17	13	23	20	64.6	64.6
Q9QYI3	Q9QYI3	35	35	35	DnaJ homolog subfamily C member 7	Dnajc7	sp|Q9QYI3|DNJC7_MOUSE DnaJ homolog subfamily C member 7 OS=Mus musculus GN=Dnajc7 PE=1 SV=2	1	35	35	35	29	30	26	31	30	28	16	14	10	13	16	16	29	30	26	31	30	28	16	14	10	13	16	16	29	30	26	31	30	28	16	14	10	13	16	16	62.1	62.1
Q9Z1X4	Q9Z1X4	35	35	30	Interleukin enhancer-binding factor 3	Ilf3	sp|Q9Z1X4|ILF3_MOUSE Interleukin enhancer-binding factor 3 OS=Mus musculus GN=Ilf3 PE=1 SV=2	1	35	35	30	30	27	26	28	28	29	22	20	18	19	21	22	30	27	26	28	28	29	22	20	18	19	21	22	25	23	22	23	24	24	18	18	15	16	17	18	55.3	55.3
A2AKX3	A2AKX3	34	34	33	Probable helicase senataxin	Setx	sp|A2AKX3|SETX_MOUSE Probable helicase senataxin OS=Mus musculus GN=Setx PE=1 SV=1	1	34	34	33	27	26	25	22	20	19	13	18	13	12	12	14	27	26	25	22	20	19	13	18	13	12	12	14	26	25	24	21	19	18	13	17	13	12	12	14	18.1	18.1
B2RXS4;Q9QZC2;Q3UH93	B2RXS4	34;1;1	34;1;1	34;1;1	Plexin-B2	Plxnb2	sp|B2RXS4|PLXB2_MOUSE Plexin-B2 OS=Mus musculus GN=Plxnb2 PE=1 SV=1	3	34	34	34	30	30	29	33	27	25	15	11	7	8	16	16	30	30	29	33	27	25	15	11	7	8	16	16	30	30	29	33	27	25	15	11	7	8	16	16	25.7	25.7
O08784	O08784	34	34	34	Treacle protein	Tcof1	sp|O08784|TCOF_MOUSE Treacle protein OS=Mus musculus GN=Tcof1 PE=1 SV=1	1	34	34	34	22	23	19	22	21	20	20	21	21	23	23	25	22	23	19	22	21	20	20	21	21	23	23	25	22	23	19	22	21	20	20	21	21	23	23	25	38	38
O55143	O55143	34	34	22	Sarcoplasmic/endoplasmic reticulum calcium ATPase 2	Atp2a2	sp|O55143|AT2A2_MOUSE Sarcoplasmic/endoplasmic reticulum calcium ATPase 2 OS=Mus musculus GN=Atp2a2 PE=1 SV=2	1	34	34	22	32	32	27	28	32	29	25	21	18	18	21	22	32	32	27	28	32	29	25	21	18	18	21	22	20	20	17	17	20	18	14	14	10	10	14	15	37.3	37.3
O89053	O89053	34	34	34	Coronin-1A	Coro1a	sp|O89053|COR1A_MOUSE Coronin-1A OS=Mus musculus GN=Coro1a PE=1 SV=5	1	34	34	34	32	31	26	30	30	29	22	22	13	18	24	22	32	31	26	30	30	29	22	22	13	18	24	22	32	31	26	30	30	29	22	22	13	18	24	22	62.7	62.7
P09103	P09103	34	34	34	Protein disulfide-isomerase	P4hb	sp|P09103|PDIA1_MOUSE Protein disulfide-isomerase OS=Mus musculus GN=P4hb PE=1 SV=2	1	34	34	34	31	30	27	30	30	28	12	14	11	5	11	11	31	30	27	30	30	28	12	14	11	5	11	11	31	30	27	30	30	28	12	14	11	5	11	11	62.9	62.9
P16858;Q64467	P16858	34;3	34;3	34;3	Glyceraldehyde-3-phosphate dehydrogenase	Gapdh	sp|P16858|G3P_MOUSE Glyceraldehyde-3-phosphate dehydrogenase OS=Mus musculus GN=Gapdh PE=1 SV=2	2	34	34	34	31	32	28	30	30	31	20	18	19	17	21	21	31	32	28	30	30	31	20	18	19	17	21	21	31	32	28	30	30	31	20	18	19	17	21	21	88.3	88.3
P33609	P33609	34	34	34	DNA polymerase alpha catalytic subunit	Pola1	sp|P33609|DPOLA_MOUSE DNA polymerase alpha catalytic subunit OS=Mus musculus GN=Pola1 PE=1 SV=2	1	34	34	34	28	30	28	26	28	26	13	13	12	5	12	11	28	30	28	26	28	26	13	13	12	5	12	11	28	30	28	26	28	26	13	13	12	5	12	11	29.6	29.6
P61979	P61979	34	34	34	Heterogeneous nuclear ribonucleoprotein K	Hnrnpk	sp|P61979|HNRPK_MOUSE Heterogeneous nuclear ribonucleoprotein K OS=Mus musculus GN=Hnrnpk PE=1 SV=1	1	34	34	34	31	34	28	30	32	30	24	26	24	20	28	27	31	34	28	30	32	30	24	26	24	20	28	27	31	34	28	30	32	30	24	26	24	20	28	27	66.3	66.3
P70335	P70335	34	34	31	Rho-associated protein kinase 1	Rock1	sp|P70335|ROCK1_MOUSE Rho-associated protein kinase 1 OS=Mus musculus GN=Rock1 PE=1 SV=1	1	34	34	31	21	22	15	18	27	28	7	4	4	3	14	11	21	22	15	18	27	28	7	4	4	3	14	11	20	21	14	17	26	26	7	4	4	3	13	10	27	27
P80316	P80316	34	34	34	T-complex protein 1 subunit epsilon	Cct5	sp|P80316|TCPE_MOUSE T-complex protein 1 subunit epsilon OS=Mus musculus GN=Cct5 PE=1 SV=1	1	34	34	34	33	34	26	30	33	31	23	20	17	17	22	21	33	34	26	30	33	31	23	20	17	17	22	21	33	34	26	30	33	31	23	20	17	17	22	21	70.4	70.4
Q61033	Q61033	34	34	22	Lamina-associated polypeptide 2, isoforms alpha/zeta	Tmpo	sp|Q61033|LAP2A_MOUSE Lamina-associated polypeptide 2, isoforms alpha/zeta OS=Mus musculus GN=Tmpo PE=1 SV=4	1	34	34	22	30	30	25	28	28	28	22	24	20	20	22	23	30	30	25	28	28	28	22	24	20	20	22	23	20	19	16	18	18	19	15	16	13	15	15	13	64.1	64.1
Q66JQ7	Q66JQ7	34	34	34	Protein CASC5	Casc5	sp|Q66JQ7|KNL1_MOUSE Kinetochore scaffold 1 OS=Mus musculus GN=Knl1 PE=1 SV=3	1	34	34	34	26	25	20	23	23	24	22	21	24	18	20	21	26	25	20	23	23	24	22	21	24	18	20	21	26	25	20	23	23	24	22	21	24	18	20	21	27.4	27.4
Q7TMK9	Q7TMK9	34	34	34	Heterogeneous nuclear ribonucleoprotein Q	Syncrip	sp|Q7TMK9|HNRPQ_MOUSE Heterogeneous nuclear ribonucleoprotein Q OS=Mus musculus GN=Syncrip PE=1 SV=2	1	34	34	34	30	32	29	29	30	30	23	23	25	22	28	26	30	32	29	29	30	30	23	23	25	22	28	26	30	32	29	29	30	30	23	23	25	22	28	26	60.5	60.5
Q80YR5	Q80YR5	34	34	22	Scaffold attachment factor B2	Safb2	sp|Q80YR5|SAFB2_MOUSE Scaffold attachment factor B2 OS=Mus musculus GN=Safb2 PE=1 SV=2	1	34	34	22	29	30	28	30	28	26	12	15	11	7	9	9	29	30	28	30	28	26	12	15	11	7	9	9	18	19	17	19	18	17	9	10	9	6	7	7	34.1	34.1
Q8BZN6	Q8BZN6	34	34	34	Dedicator of cytokinesis protein 10	Dock10	sp|Q8BZN6|DOC10_MOUSE Dedicator of cytokinesis protein 10 OS=Mus musculus GN=Dock10 PE=1 SV=3	1	34	34	34	29	29	24	25	24	22	12	14	14	9	13	17	29	29	24	25	24	22	12	14	14	9	13	17	29	29	24	25	24	22	12	14	14	9	13	17	19.8	19.8
Q8CFI7	Q8CFI7	34	34	34	DNA-directed RNA polymerase II subunit RPB2	Polr2b	sp|Q8CFI7|RPB2_MOUSE DNA-directed RNA polymerase II subunit RPB2 OS=Mus musculus GN=Polr2b PE=1 SV=2	1	34	34	34	31	26	27	29	28	28	18	16	17	15	22	21	31	26	27	29	28	28	18	16	17	15	22	21	31	26	27	29	28	28	18	16	17	15	22	21	33.2	33.2
Q8CJF7	Q8CJF7	34	34	34	Protein ELYS	Ahctf1	sp|Q8CJF7|ELYS_MOUSE Protein ELYS OS=Mus musculus GN=Ahctf1 PE=1 SV=1	1	34	34	34	22	24	24	22	17	21	15	11	13	12	15	10	22	24	24	22	17	21	15	11	13	12	15	10	22	24	24	22	17	21	15	11	13	12	15	10	22.4	22.4
Q8R081	Q8R081	34	34	34	Heterogeneous nuclear ribonucleoprotein L	Hnrnpl	sp|Q8R081|HNRPL_MOUSE Heterogeneous nuclear ribonucleoprotein L OS=Mus musculus GN=Hnrnpl PE=1 SV=2	1	34	34	34	31	32	27	31	30	32	17	16	21	15	22	22	31	32	27	31	30	32	17	16	21	15	22	22	31	32	27	31	30	32	17	16	21	15	22	22	76.6	76.6
Q9DBG3	Q9DBG3	34	34	19	AP-2 complex subunit beta	Ap2b1	sp|Q9DBG3|AP2B1_MOUSE AP-2 complex subunit beta OS=Mus musculus GN=Ap2b1 PE=1 SV=1	1	34	34	19	30	27	24	27	24	26	15	15	16	12	17	12	30	27	24	27	24	26	15	15	16	12	17	12	17	17	17	17	14	16	5	7	8	5	9	6	47.6	47.6
Q9DBY8	Q9DBY8	34	34	34	Nuclear valosin-containing protein-like	Nvl	sp|Q9DBY8|NVL_MOUSE Nuclear valosin-containing protein-like OS=Mus musculus GN=Nvl PE=1 SV=1	1	34	34	34	26	32	25	30	27	28	22	17	18	15	21	18	26	32	25	30	27	28	22	17	18	15	21	18	26	32	25	30	27	28	22	17	18	15	21	18	54.9	54.9
Q9Z315	Q9Z315	34	34	34	U4/U6.U5 tri-snRNP-associated protein 1	Sart1	sp|Q9Z315|SNUT1_MOUSE U4/U6.U5 tri-snRNP-associated protein 1 OS=Mus musculus GN=Sart1 PE=1 SV=1	1	34	34	34	27	28	22	28	24	25	20	18	17	17	19	20	27	28	22	28	24	25	20	18	17	17	19	20	27	28	22	28	24	25	20	18	17	17	19	20	53.3	53.3
P14824	P14824	33	33	33	Annexin A6	Anxa6	sp|P14824|ANXA6_MOUSE Annexin A6 OS=Mus musculus GN=Anxa6 PE=1 SV=3	1	33	33	33	25	21	22	28	25	26	2	1	2	3	7	6	25	21	22	28	25	26	2	1	2	3	7	6	25	21	22	28	25	26	2	1	2	3	7	6	55	55
P30416	P30416	33	33	33	Peptidyl-prolyl cis-trans isomerase FKBP4;Peptidyl-prolyl cis-trans isomerase FKBP4, N-terminally processed	Fkbp4	sp|P30416|FKBP4_MOUSE Peptidyl-prolyl cis-trans isomerase FKBP4 OS=Mus musculus GN=Fkbp4 PE=1 SV=5	1	33	33	33	29	31	28	27	29	30	18	11	10	11	23	23	29	31	28	27	29	30	18	11	10	11	23	23	29	31	28	27	29	30	18	11	10	11	23	23	71	71
Q3UPF5	Q3UPF5	33	33	33	Zinc finger CCCH-type antiviral protein 1	Zc3hav1	sp|Q3UPF5|ZCCHV_MOUSE Zinc finger CCCH-type antiviral protein 1 OS=Mus musculus GN=Zc3hav1 PE=1 SV=1	1	33	33	33	27	28	25	26	27	30	16	14	13	15	15	16	27	28	25	26	27	30	16	14	13	15	15	16	27	28	25	26	27	30	16	14	13	15	15	16	49.7	49.7
Q60875	Q60875	33	33	33	Rho guanine nucleotide exchange factor 2	Arhgef2	sp|Q60875|ARHG2_MOUSE Rho guanine nucleotide exchange factor 2 OS=Mus musculus GN=Arhgef2 PE=1 SV=4	1	33	33	33	22	25	23	23	26	27	15	11	15	15	17	16	22	25	23	23	26	27	15	11	15	15	17	16	22	25	23	23	26	27	15	11	15	15	17	16	47.1	47.1
Q61598	Q61598	33	33	27	Rab GDP dissociation inhibitor beta	Gdi2	sp|Q61598|GDIB_MOUSE Rab GDP dissociation inhibitor beta OS=Mus musculus GN=Gdi2 PE=1 SV=1	1	33	33	27	31	29	29	32	29	29	10	7	7	7	8	10	31	29	29	32	29	29	10	7	7	7	8	10	25	23	23	26	23	23	8	7	6	5	7	7	76.2	76.2
Q62351	Q62351	33	33	33	Transferrin receptor protein 1	Tfrc	sp|Q62351|TFR1_MOUSE Transferrin receptor protein 1 OS=Mus musculus GN=Tfrc PE=1 SV=1	1	33	33	33	25	28	26	27	24	24	16	16	13	10	15	12	25	28	26	27	24	24	16	16	13	10	15	12	25	28	26	27	24	24	16	16	13	10	15	12	45.7	45.7
Q8BJ71	Q8BJ71	33	33	33	Nuclear pore complex protein Nup93	Nup93	sp|Q8BJ71|NUP93_MOUSE Nuclear pore complex protein Nup93 OS=Mus musculus GN=Nup93 PE=1 SV=1	1	33	33	33	29	28	25	27	27	26	15	19	14	11	18	18	29	28	25	27	27	26	15	19	14	11	18	18	29	28	25	27	27	26	15	19	14	11	18	18	41.9	41.9
Q8BL66	Q8BL66	33	33	33	Early endosome antigen 1	Eea1	sp|Q8BL66|EEA1_MOUSE Early endosome antigen 1 OS=Mus musculus GN=Eea1 PE=1 SV=2	1	33	33	33	26	23	25	26	21	24	3	2	2	2	4	7	26	23	25	26	21	24	3	2	2	2	4	7	26	23	25	26	21	24	3	2	2	2	4	7	28.7	28.7
Q8CH18	Q8CH18	33	33	33	Cell division cycle and apoptosis regulator protein 1	Ccar1	sp|Q8CH18|CCAR1_MOUSE Cell division cycle and apoptosis regulator protein 1 OS=Mus musculus GN=Ccar1 PE=1 SV=1	1	33	33	33	27	29	22	24	28	30	20	16	11	12	18	14	27	29	22	24	28	30	20	16	11	12	18	14	27	29	22	24	28	30	20	16	11	12	18	14	34.8	34.8
Q8CJ40	Q8CJ40	33	33	33	Rootletin	Crocc	sp|Q8CJ40|CROCC_MOUSE Rootletin OS=Mus musculus GN=Crocc PE=1 SV=2	1	33	33	33	21	23	22	19	22	18	20	9	11	11	11	15	21	23	22	19	22	18	20	9	11	11	11	15	21	23	22	19	22	18	20	9	11	11	11	15	19.2	19.2
Q8K4Z5	Q8K4Z5	33	33	33	Splicing factor 3A subunit 1	Sf3a1	sp|Q8K4Z5|SF3A1_MOUSE Splicing factor 3A subunit 1 OS=Mus musculus GN=Sf3a1 PE=1 SV=1	1	33	33	33	29	28	27	28	27	28	16	20	19	13	15	15	29	28	27	28	27	28	16	20	19	13	15	15	29	28	27	28	27	28	16	20	19	13	15	15	41.3	41.3
Q8VDM6	Q8VDM6	33	33	33	Heterogeneous nuclear ribonucleoprotein U-like protein 1	Hnrnpul1	sp|Q8VDM6|HNRL1_MOUSE Heterogeneous nuclear ribonucleoprotein U-like protein 1 OS=Mus musculus GN=Hnrnpul1 PE=1 SV=1	1	33	33	33	29	30	27	26	28	26	21	22	19	16	22	20	29	30	27	26	28	26	21	22	19	16	22	20	29	30	27	26	28	26	21	22	19	16	22	20	44.6	44.6
Q922B2	Q922B2	33	33	33	Aspartate--tRNA ligase, cytoplasmic	Dars	sp|Q922B2|SYDC_MOUSE Aspartate--tRNA ligase, cytoplasmic OS=Mus musculus GN=Dars PE=1 SV=2	1	33	33	33	29	27	27	27	28	25	19	20	19	16	22	21	29	27	27	27	28	25	19	20	19	16	22	21	29	27	27	27	28	25	19	20	19	16	22	21	68.9	68.9
Q9CQN1	Q9CQN1	33	33	33	Heat shock protein 75 kDa, mitochondrial	Trap1	sp|Q9CQN1|TRAP1_MOUSE Heat shock protein 75 kDa, mitochondrial OS=Mus musculus GN=Trap1 PE=1 SV=1	1	33	33	33	30	30	29	30	26	27	19	17	16	14	16	14	30	30	29	30	26	27	19	17	16	14	16	14	30	30	29	30	26	27	19	17	16	14	16	14	54	54
Q9CZU3	Q9CZU3	33	33	33	Superkiller viralicidic activity 2-like 2	Skiv2l2	sp|Q9CZU3|SK2L2_MOUSE Superkiller viralicidic activity 2-like 2 OS=Mus musculus GN=Skiv2l2 PE=1 SV=1	1	33	33	33	26	30	24	25	28	29	22	21	17	17	18	15	26	30	24	25	28	29	22	21	17	17	18	15	26	30	24	25	28	29	22	21	17	17	18	15	39.5	39.5
Q9D0R2	Q9D0R2	33	33	33	Threonine--tRNA ligase, cytoplasmic	Tars	sp|Q9D0R2|SYTC_MOUSE Threonine--tRNA ligase, cytoplasmic OS=Mus musculus GN=Tars PE=1 SV=2	1	33	33	33	30	30	29	31	30	29	15	15	12	13	17	17	30	30	29	31	30	29	15	15	12	13	17	17	30	30	29	31	30	29	15	15	12	13	17	17	51.4	51.4
Q9ESZ8;Q99NI3	Q9ESZ8	33;1	33;1	33;1	General transcription factor II-I	Gtf2i	sp|Q9ESZ8|GTF2I_MOUSE General transcription factor II-I OS=Mus musculus GN=Gtf2i PE=1 SV=3	2	33	33	33	26	26	25	24	25	28	16	16	8	9	18	19	26	26	25	24	25	28	16	16	8	9	18	19	26	26	25	24	25	28	16	16	8	9	18	19	37.5	37.5
O35286	O35286	32	32	31	Pre-mRNA-splicing factor ATP-dependent RNA helicase DHX15	Dhx15	sp|O35286|DHX15_MOUSE Pre-mRNA-splicing factor ATP-dependent RNA helicase DHX15 OS=Mus musculus GN=Dhx15 PE=1 SV=2	1	32	32	31	24	23	26	25	25	27	21	19	15	10	17	17	24	23	26	25	25	27	21	19	15	10	17	17	23	22	25	25	24	26	21	19	15	10	17	17	46.7	46.7
P26638	P26638	32	32	32	Serine--tRNA ligase, cytoplasmic	Sars	sp|P26638|SYSC_MOUSE Serine--tRNA ligase, cytoplasmic OS=Mus musculus GN=Sars PE=1 SV=3	1	32	32	32	24	28	20	25	25	29	14	13	12	10	20	17	24	28	20	25	25	29	14	13	12	10	20	17	24	28	20	25	25	29	14	13	12	10	20	17	53.3	53.3
P56960	P56960	32	32	32	Exosome component 10	Exosc10	sp|P56960|EXOSX_MOUSE Exosome component 10 OS=Mus musculus GN=Exosc10 PE=1 SV=2	1	32	32	32	25	24	19	23	26	25	21	16	16	14	17	18	25	24	19	23	26	25	21	16	16	14	17	18	25	24	19	23	26	25	21	16	16	14	17	18	50.3	50.3
P60843	P60843	32	32	17	Eukaryotic initiation factor 4A-I	Eif4a1	sp|P60843|IF4A1_MOUSE Eukaryotic initiation factor 4A-I OS=Mus musculus GN=Eif4a1 PE=1 SV=1	1	32	32	17	30	30	28	29	29	30	23	23	21	18	24	25	30	30	28	29	29	30	23	23	21	18	24	25	16	16	15	16	15	15	14	13	10	9	13	14	75.1	75.1
Q3UMU9;Q9JMG7	Q3UMU9	32;2	32;2	31;1	Hepatoma-derived growth factor-related protein 2	Hdgfrp2	sp|Q3UMU9|HDGR2_MOUSE Hepatoma-derived growth factor-related protein 2 OS=Mus musculus GN=Hdgfl2 PE=1 SV=1	2	32	32	31	22	20	16	22	17	17	18	21	18	19	19	21	22	20	16	22	17	17	18	21	18	19	19	21	21	20	16	21	16	16	18	21	17	19	19	21	57	57
Q60848	Q60848	32	32	32	Lymphocyte-specific helicase	Hells	sp|Q60848|HELLS_MOUSE Lymphocyte-specific helicase OS=Mus musculus GN=Hells PE=1 SV=2	1	32	32	32	24	25	22	25	26	26	18	17	15	14	19	18	24	25	22	25	26	26	18	17	15	14	19	18	24	25	22	25	26	26	18	17	15	14	19	18	39.5	39.5
Q8BG05	Q8BG05	32	32	29	Heterogeneous nuclear ribonucleoprotein A3	Hnrnpa3	sp|Q8BG05|ROA3_MOUSE Heterogeneous nuclear ribonucleoprotein A3 OS=Mus musculus GN=Hnrnpa3 PE=1 SV=1	1	32	32	29	30	30	29	30	31	29	14	16	12	10	18	15	30	30	29	30	31	29	14	16	12	10	18	15	28	28	28	28	28	27	13	15	11	9	17	15	54.4	54.4
Q8BRT1	Q8BRT1	37	32	32	CLIP-associating protein 2	Clasp2	sp|Q8BRT1|CLAP2_MOUSE CLIP-associating protein 2 OS=Mus musculus GN=Clasp2 PE=1 SV=1	1	37	32	32	20	22	19	27	20	22	14	17	21	16	17	18	17	19	16	24	17	19	11	14	16	11	13	14	17	19	16	24	17	19	11	14	16	11	13	14	33.8	29.3
Q8JZQ9	Q8JZQ9	32	32	32	Eukaryotic translation initiation factor 3 subunit B	Eif3b	sp|Q8JZQ9|EIF3B_MOUSE Eukaryotic translation initiation factor 3 subunit B OS=Mus musculus GN=Eif3b PE=1 SV=1	1	32	32	32	27	29	26	30	26	28	24	23	19	17	21	22	27	29	26	30	26	28	24	23	19	17	21	22	27	29	26	30	26	28	24	23	19	17	21	22	50.1	50.1
Q91WQ3	Q91WQ3	32	32	32	Tyrosine--tRNA ligase, cytoplasmic;Tyrosine--tRNA ligase, cytoplasmic, N-terminally processed	Yars	sp|Q91WQ3|SYYC_MOUSE Tyrosine--tRNA ligase, cytoplasmic OS=Mus musculus GN=Yars PE=1 SV=3	1	32	32	32	28	29	29	30	24	26	17	17	16	14	14	18	28	29	29	30	24	26	17	17	16	14	14	18	28	29	29	30	24	26	17	17	16	14	14	18	63.1	63.1
Q91YQ5	Q91YQ5	32	32	32	Dolichyl-diphosphooligosaccharide--protein glycosyltransferase subunit 1	Rpn1	sp|Q91YQ5|RPN1_MOUSE Dolichyl-diphosphooligosaccharide--protein glycosyltransferase subunit 1 OS=Mus musculus GN=Rpn1 PE=1 SV=1	1	32	32	32	28	26	20	25	27	27	23	26	19	18	20	21	28	26	20	25	27	27	23	26	19	18	20	21	28	26	20	25	27	27	23	26	19	18	20	21	59.5	59.5
Q921M3	Q921M3	32	32	32	Splicing factor 3B subunit 3	Sf3b3	sp|Q921M3|SF3B3_MOUSE Splicing factor 3B subunit 3 OS=Mus musculus GN=Sf3b3 PE=1 SV=1	1	32	32	32	27	27	26	27	28	24	22	22	17	21	20	18	27	27	26	27	28	24	22	22	17	21	20	18	27	27	26	27	28	24	22	22	17	21	20	18	35.4	35.4
Q99NH0	Q99NH0	32	32	32	Ankyrin repeat domain-containing protein 17	Ankrd17	sp|Q99NH0|ANR17_MOUSE Ankyrin repeat domain-containing protein 17 OS=Mus musculus GN=Ankrd17 PE=1 SV=2	1	32	32	32	24	21	17	18	19	23	9	8	9	11	8	15	24	21	17	18	19	23	9	8	9	11	8	15	24	21	17	18	19	23	9	8	9	11	8	15	17.1	17.1
Q9DCD2	Q9DCD2	32	32	32	Pre-mRNA-splicing factor SYF1	Xab2	sp|Q9DCD2|SYF1_MOUSE Pre-mRNA-splicing factor SYF1 OS=Mus musculus GN=Xab2 PE=1 SV=1	1	32	32	32	25	25	20	24	27	29	12	12	9	9	13	12	25	25	20	24	27	29	12	12	9	9	13	12	25	25	20	24	27	29	12	12	9	9	13	12	42.8	42.8
Q9ES52	Q9ES52	32	32	31	Phosphatidylinositol 3,4,5-trisphosphate 5-phosphatase 1	Inpp5d	sp|Q9ES52|SHIP1_MOUSE Phosphatidylinositol 3,4,5-trisphosphate 5-phosphatase 1 OS=Mus musculus GN=Inpp5d PE=1 SV=2	1	32	32	31	24	29	27	27	28	27	10	8	7	11	14	13	24	29	27	27	28	27	10	8	7	11	14	13	23	28	26	26	28	27	9	8	6	10	13	12	33.1	33.1
Q9JLN9	Q9JLN9	32	32	32	Serine/threonine-protein kinase mTOR	Mtor	sp|Q9JLN9|MTOR_MOUSE Serine/threonine-protein kinase mTOR OS=Mus musculus GN=Mtor PE=1 SV=2	1	32	32	32	23	23	17	21	27	25	8	7	7	6	11	6	23	23	17	21	27	25	8	7	7	6	11	6	23	23	17	21	27	25	8	7	7	6	11	6	16.9	16.9
E9Q557	E9Q557	31	31	31	Desmoplakin	Dsp	sp|E9Q557|DESP_MOUSE Desmoplakin OS=Mus musculus GN=Dsp PE=1 SV=1	1	31	31	31	0	0	9	7	0	1	28	27	20	24	19	25	0	0	9	7	0	1	28	27	20	24	19	25	0	0	9	7	0	1	28	27	20	24	19	25	11.7	11.7
E9Q5F9	E9Q5F9	31	31	31	Histone-lysine N-methyltransferase SETD2	Setd2	sp|E9Q5F9|SETD2_MOUSE Histone-lysine N-methyltransferase SETD2 OS=Mus musculus GN=Setd2 PE=1 SV=1	1	31	31	31	18	23	14	19	12	15	15	15	11	8	9	7	18	23	14	19	12	15	15	15	11	8	9	7	18	23	14	19	12	15	15	15	11	8	9	7	14.9	14.9
O08759	O08759	31	31	31	Ubiquitin-protein ligase E3A	Ube3a	sp|O08759|UBE3A_MOUSE Ubiquitin-protein ligase E3A OS=Mus musculus GN=Ube3a PE=1 SV=2	1	31	31	31	28	23	14	23	27	24	5	7	4	6	11	12	28	23	14	23	27	24	5	7	4	6	11	12	28	23	14	23	27	24	5	7	4	6	11	12	43.1	43.1
O55201	O55201	31	31	31	Transcription elongation factor SPT5	Supt5h	sp|O55201|SPT5H_MOUSE Transcription elongation factor SPT5 OS=Mus musculus GN=Supt5h PE=1 SV=1	1	31	31	31	20	22	23	21	25	25	14	13	8	11	16	14	20	22	23	21	25	25	14	13	8	11	16	14	20	22	23	21	25	25	14	13	8	11	16	14	38.8	38.8
P07901;REV__Q8BL66	P07901	48;1	31;0	31;0	Heat shock protein HSP 90-alpha	Hsp90aa1	sp|P07901|HS90A_MOUSE Heat shock protein HSP 90-alpha OS=Mus musculus GN=Hsp90aa1 PE=1 SV=4	2	48	31	31	45	46	43	44	45	47	33	34	35	24	38	39	29	29	27	29	29	30	20	21	22	14	24	24	29	29	27	29	29	30	20	21	22	14	24	24	57.6	41.1
P09411	P09411	31	31	26	Phosphoglycerate kinase 1	Pgk1	sp|P09411|PGK1_MOUSE Phosphoglycerate kinase 1 OS=Mus musculus GN=Pgk1 PE=1 SV=4	1	31	31	26	28	29	25	26	27	28	21	21	15	15	23	21	28	29	25	26	27	28	21	21	15	15	23	21	24	24	20	22	22	23	17	16	12	11	18	16	82	82
P25976	P25976	31	31	31	Nucleolar transcription factor 1	Ubtf	sp|P25976|UBF1_MOUSE Nucleolar transcription factor 1 OS=Mus musculus GN=Ubtf PE=1 SV=1	1	31	31	31	27	28	21	28	26	27	22	22	25	21	23	20	27	28	21	28	26	27	22	22	25	21	23	20	27	28	21	28	26	27	22	22	25	21	23	20	37.1	37.1
P29351	P29351	31	31	31	Tyrosine-protein phosphatase non-receptor type 6	Ptpn6	sp|P29351|PTN6_MOUSE Tyrosine-protein phosphatase non-receptor type 6 OS=Mus musculus GN=Ptpn6 PE=1 SV=2	1	31	31	31	29	30	28	29	27	29	23	21	14	18	22	24	29	30	28	29	27	29	23	21	14	18	22	24	29	30	28	29	27	29	23	21	14	18	22	24	63.2	63.2
P35123	P35123	31	31	28	Ubiquitin carboxyl-terminal hydrolase 4	Usp4	sp|P35123|UBP4_MOUSE Ubiquitin carboxyl-terminal hydrolase 4 OS=Mus musculus GN=Usp4 PE=1 SV=3	1	31	31	28	27	28	24	24	26	26	13	13	11	13	17	17	27	28	24	24	26	26	13	13	11	13	17	17	25	25	21	21	25	25	11	10	11	12	15	14	44.3	44.3
P46471	P46471	31	31	31	26S protease regulatory subunit 7	Psmc2	sp|P46471|PRS7_MOUSE 26S proteasome regulatory subunit 7 OS=Mus musculus GN=Psmc2 PE=1 SV=5	1	31	31	31	27	28	23	24	25	24	21	20	14	18	26	23	27	28	23	24	25	24	21	20	14	18	26	23	27	28	23	24	25	24	21	20	14	18	26	23	68.8	68.8
Q3TBD2	Q3TBD2	31	31	31	Minor histocompatibility protein HA-1	Hmha1	sp|Q3TBD2|HMHA1_MOUSE Rho GTPase-activating protein 45 OS=Mus musculus GN=Arhgap45 PE=1 SV=2	1	31	31	31	25	28	25	28	28	27	14	13	10	8	14	14	25	28	25	28	28	27	14	13	10	8	14	14	25	28	25	28	28	27	14	13	10	8	14	14	34.9	34.9
Q3UJB9	Q3UJB9	31	31	31	Enhancer of mRNA-decapping protein 4	Edc4	sp|Q3UJB9|EDC4_MOUSE Enhancer of mRNA-decapping protein 4 OS=Mus musculus GN=Edc4 PE=1 SV=2	1	31	31	31	28	26	22	25	27	25	15	20	15	14	19	15	28	26	22	25	27	25	15	20	15	14	19	15	28	26	22	25	27	25	15	20	15	14	19	15	30.4	30.4
Q3UMC0;Q9D3R6	Q3UMC0	31;1	31;1	31;1	Spermatogenesis-associated protein 5	Spata5	sp|Q3UMC0|SPAT5_MOUSE Spermatogenesis-associated protein 5 OS=Mus musculus GN=Spata5 PE=1 SV=2	2	31	31	31	24	25	22	29	22	24	16	16	15	11	15	16	24	25	22	29	22	24	16	16	15	11	15	16	24	25	22	29	22	24	16	16	15	11	15	16	43.9	43.9
Q7TQH0	Q7TQH0	31	31	31	Ataxin-2-like protein	Atxn2l	sp|Q7TQH0|ATX2L_MOUSE Ataxin-2-like protein OS=Mus musculus GN=Atxn2l PE=1 SV=1	1	31	31	31	27	24	24	28	24	22	16	12	11	7	16	13	27	24	24	28	24	22	16	12	11	7	16	13	27	24	24	28	24	22	16	12	11	7	16	13	28.8	28.8
Q8BML9	Q8BML9	32	31	31		Qars	sp|Q8BML9|SYQ_MOUSE Glutamine--tRNA ligase OS=Mus musculus GN=Qars PE=1 SV=1	1	32	31	31	30	29	25	27	28	27	21	21	19	12	20	21	29	28	25	26	27	26	21	21	18	12	19	20	29	28	25	26	27	26	21	21	18	12	19	20	47	45.9
Q8BVE8	Q8BVE8	31	31	31	Histone-lysine N-methyltransferase NSD2	Whsc1	sp|Q8BVE8|NSD2_MOUSE Histone-lysine N-methyltransferase NSD2 OS=Mus musculus GN=Nsd2 PE=1 SV=2	1	31	31	31	25	23	22	25	24	24	17	15	16	13	19	21	25	23	22	25	24	24	17	15	16	13	19	21	25	23	22	25	24	24	17	15	16	13	19	21	30.2	30.2
Q8K389	Q8K389	31	31	30	CDK5 regulatory subunit-associated protein 2	Cdk5rap2	sp|Q8K389|CK5P2_MOUSE CDK5 regulatory subunit-associated protein 2 OS=Mus musculus GN=Cdk5rap2 PE=1 SV=3	1	31	31	30	22	20	17	22	15	15	18	13	11	14	17	16	22	20	17	22	15	15	18	13	11	14	17	16	22	19	17	21	15	15	17	13	11	13	17	16	19.3	19.3
Q8K4L3	Q8K4L3	31	31	31	Supervillin	Svil	sp|Q8K4L3|SVIL_MOUSE Supervillin OS=Mus musculus GN=Svil PE=1 SV=1	1	31	31	31	21	27	19	21	21	24	7	9	11	11	10	12	21	27	19	21	21	24	7	9	11	11	10	12	21	27	19	21	21	24	7	9	11	11	10	12	18.6	18.6
Q925I1	Q925I1	31	31	31	ATPase family AAA domain-containing protein 3	Atad3	sp|Q925I1|ATAD3_MOUSE ATPase family AAA domain-containing protein 3 OS=Mus musculus GN=Atad3 PE=1 SV=1	1	31	31	31	24	24	21	25	25	25	17	19	16	16	15	14	24	24	21	25	25	25	17	19	16	16	15	14	24	24	21	25	25	25	17	19	16	16	15	14	55.7	55.7
Q9CY58	Q9CY58	31	31	31	Plasminogen activator inhibitor 1 RNA-binding protein	Serbp1	sp|Q9CY58|PAIRB_MOUSE Plasminogen activator inhibitor 1 RNA-binding protein OS=Mus musculus GN=Serbp1 PE=1 SV=2	1	31	31	31	28	29	27	28	28	30	15	11	12	7	13	13	28	29	27	28	28	30	15	11	12	7	13	13	28	29	27	28	28	30	15	11	12	7	13	13	62.4	62.4
D0QMC3	D0QMC3	30	30	18	Myeloid cell nuclear differentiation antigen-like protein	Mndal	sp|D0QMC3|MNDAL_MOUSE Myeloid cell nuclear differentiation antigen-like protein OS=Mus musculus GN=Mndal PE=1 SV=1	1	30	30	18	24	22	19	23	26	27	17	17	14	12	23	19	24	22	19	23	26	27	17	17	14	12	23	19	15	13	10	14	15	17	13	12	9	7	16	14	58.2	58.2
O08788	O08788	30	30	30	Dynactin subunit 1	Dctn1	sp|O08788|DCTN1_MOUSE Dynactin subunit 1 OS=Mus musculus GN=Dctn1 PE=1 SV=3	1	30	30	30	21	22	20	21	21	24	10	9	7	8	15	13	21	22	20	21	21	24	10	9	7	8	15	13	21	22	20	21	21	24	10	9	7	8	15	13	30.4	30.4
P14685	P14685	30	30	30	26S proteasome non-ATPase regulatory subunit 3	Psmd3	sp|P14685|PSMD3_MOUSE 26S proteasome non-ATPase regulatory subunit 3 OS=Mus musculus GN=Psmd3 PE=1 SV=3	1	30	30	30	26	26	20	23	25	23	16	17	16	11	18	17	26	26	20	23	25	23	16	17	16	11	18	17	26	26	20	23	25	23	16	17	16	11	18	17	58.5	58.5
P17182;P17183	P17182	30;4	30;4	26;1	Alpha-enolase	Eno1	sp|P17182|ENOA_MOUSE Alpha-enolase OS=Mus musculus GN=Eno1 PE=1 SV=3	2	30	30	26	29	30	26	27	29	28	22	20	22	19	22	19	29	30	26	27	29	28	22	20	22	19	22	19	26	26	23	24	25	24	19	17	19	16	19	17	80.4	80.4
P27659	P27659	30	30	30	60S ribosomal protein L3	Rpl3	sp|P27659|RL3_MOUSE 60S ribosomal protein L3 OS=Mus musculus GN=Rpl3 PE=1 SV=3	1	30	30	30	27	29	23	26	27	27	19	19	17	14	21	20	27	29	23	26	27	27	19	19	17	14	21	20	27	29	23	26	27	27	19	19	17	14	21	20	57.6	57.6
P46460	P46460	30	30	29	Vesicle-fusing ATPase	Nsf	sp|P46460|NSF_MOUSE Vesicle-fusing ATPase OS=Mus musculus GN=Nsf PE=1 SV=2	1	30	30	29	24	25	22	24	22	23	15	15	15	14	18	16	24	25	22	24	22	23	15	15	15	14	18	16	24	24	22	23	22	23	15	15	14	13	17	15	48.5	48.5
P58281	P58281	30	30	29	Dynamin-like 120 kDa protein, mitochondrial;Dynamin-like 120 kDa protein, form S1	Opa1	sp|P58281|OPA1_MOUSE Dynamin-like 120 kDa protein, mitochondrial OS=Mus musculus GN=Opa1 PE=1 SV=1	1	30	30	29	26	27	25	26	28	25	14	11	7	11	16	15	26	27	25	26	28	25	14	11	7	11	16	15	25	26	24	25	27	24	13	10	6	10	15	14	31.8	31.8
P60122	P60122	30	30	30	RuvB-like 1	Ruvbl1	sp|P60122|RUVB1_MOUSE RuvB-like 1 OS=Mus musculus GN=Ruvbl1 PE=1 SV=1	1	30	30	30	25	25	21	24	24	24	19	22	18	18	20	19	25	25	21	24	24	24	19	22	18	18	20	19	25	25	21	24	24	24	19	22	18	18	20	19	71.7	71.7
Q00PI9	Q00PI9	30	30	30	Heterogeneous nuclear ribonucleoprotein U-like protein 2	Hnrnpul2	sp|Q00PI9|HNRL2_MOUSE Heterogeneous nuclear ribonucleoprotein U-like protein 2 OS=Mus musculus GN=Hnrnpul2 PE=1 SV=2	1	30	30	30	23	25	22	24	23	24	17	13	15	11	18	15	23	25	22	24	23	24	17	13	15	11	18	15	23	25	22	24	23	24	17	13	15	11	18	15	45.4	45.4
Q3V300	Q3V300	30	30	30	Kinesin-like protein KIF22	Kif22	sp|Q3V300|KIF22_MOUSE Kinesin-like protein KIF22 OS=Mus musculus GN=Kif22 PE=2 SV=2	1	30	30	30	25	23	23	18	24	25	23	24	22	21	21	26	25	23	23	18	24	25	23	24	22	21	21	26	25	23	23	18	24	25	23	24	22	21	21	26	63	63
Q61210	Q61210	30	30	30	Rho guanine nucleotide exchange factor 1	Arhgef1	sp|Q61210|ARHG1_MOUSE Rho guanine nucleotide exchange factor 1 OS=Mus musculus GN=Arhgef1 PE=1 SV=2	1	30	30	30	28	25	24	26	27	28	15	15	11	9	12	15	28	25	24	26	27	28	15	15	11	9	12	15	28	25	24	26	27	28	15	15	11	9	12	15	37.8	37.8
Q6A065;Q80U49	Q6A065	30;1	30;1	30;1	Centrosomal protein of 170 kDa	Cep170	sp|Q6A065|CE170_MOUSE Centrosomal protein of 170 kDa OS=Mus musculus GN=Cep170 PE=1 SV=2	2	30	30	30	21	24	21	23	20	21	18	14	15	10	16	14	21	24	21	23	20	21	18	14	15	10	16	14	21	24	21	23	20	21	18	14	15	10	16	14	23.4	23.4
Q6DFW4	Q6DFW4	30	30	30	Nucleolar protein 58	Nop58	sp|Q6DFW4|NOP58_MOUSE Nucleolar protein 58 OS=Mus musculus GN=Nop58 PE=1 SV=1	1	30	30	30	26	27	22	25	26	26	20	21	21	17	19	18	26	27	22	25	26	26	20	21	21	17	19	18	26	27	22	25	26	26	20	21	21	17	19	18	62.1	62.1
Q76MZ3	Q76MZ3	30	30	23	Serine/threonine-protein phosphatase 2A 65 kDa regulatory subunit A alpha isoform	Ppp2r1a	sp|Q76MZ3|2AAA_MOUSE Serine/threonine-protein phosphatase 2A 65 kDa regulatory subunit A alpha isoform OS=Mus musculus GN=Ppp2r1a PE=1 SV=3	1	30	30	23	28	28	28	27	27	27	16	17	18	15	21	19	28	28	28	27	27	27	16	17	18	15	21	19	23	23	23	22	22	22	12	13	13	11	16	13	63.3	63.3
Q7TSG2	Q7TSG2	30	30	30	RNA polymerase II subunit A C-terminal domain phosphatase	Ctdp1	sp|Q7TSG2|CTDP1_MOUSE RNA polymerase II subunit A C-terminal domain phosphatase OS=Mus musculus GN=Ctdp1 PE=1 SV=1	1	30	30	30	28	27	23	25	24	26	7	7	7	4	11	12	28	27	23	25	24	26	7	7	7	4	11	12	28	27	23	25	24	26	7	7	7	4	11	12	46	46
Q8BT07	Q8BT07	30	30	30	Centrosomal protein of 55 kDa	Cep55	sp|Q8BT07|CEP55_MOUSE Centrosomal protein of 55 kDa OS=Mus musculus GN=Cep55 PE=1 SV=2	1	30	30	30	21	22	23	22	23	23	17	18	14	9	17	15	21	22	23	22	23	23	17	18	14	9	17	15	21	22	23	22	23	23	17	18	14	9	17	15	61.7	61.7
Q8CIN4;Q61036;O88643	Q8CIN4	30;6;4	30;6;4	30;6;4	Serine/threonine-protein kinase PAK 2;PAK-2p27;PAK-2p34	Pak2	sp|Q8CIN4|PAK2_MOUSE Serine/threonine-protein kinase PAK 2 OS=Mus musculus GN=Pak2 PE=1 SV=1	3	30	30	30	28	29	26	26	29	29	18	14	9	12	17	16	28	29	26	26	29	29	18	14	9	12	17	16	28	29	26	26	29	29	18	14	9	12	17	16	68.7	68.7
Q921N6	Q921N6	30	30	30	Probable ATP-dependent RNA helicase DDX27	Ddx27	sp|Q921N6|DDX27_MOUSE Probable ATP-dependent RNA helicase DDX27 OS=Mus musculus GN=Ddx27 PE=1 SV=3	1	30	30	30	17	23	23	22	18	19	17	18	17	13	21	14	17	23	23	22	18	19	17	18	17	13	21	14	17	23	23	22	18	19	17	18	17	13	21	14	45.9	45.9
Q9ESV0	Q9ESV0	30	30	30	ATP-dependent RNA helicase DDX24	Ddx24	sp|Q9ESV0|DDX24_MOUSE ATP-dependent RNA helicase DDX24 OS=Mus musculus GN=Ddx24 PE=1 SV=2	1	30	30	30	21	23	22	20	20	20	16	15	10	10	9	12	21	23	22	20	20	20	16	15	10	10	9	12	21	23	22	20	20	20	16	15	10	10	9	12	37.5	37.5
Q9JKY5	Q9JKY5	30	30	29	Huntingtin-interacting protein 1-related protein	Hip1r	sp|Q9JKY5|HIP1R_MOUSE Huntingtin-interacting protein 1-related protein OS=Mus musculus GN=Hip1r PE=1 SV=2	1	30	30	29	22	25	22	26	19	21	15	13	12	8	13	14	22	25	22	26	19	21	15	13	12	8	13	14	22	25	22	25	19	21	15	13	12	8	13	14	34.2	34.2
Q9QVP9	Q9QVP9	30	30	30	Protein-tyrosine kinase 2-beta	Ptk2b	sp|Q9QVP9|FAK2_MOUSE Protein-tyrosine kinase 2-beta OS=Mus musculus GN=Ptk2b PE=1 SV=2	1	30	30	30	22	27	21	25	23	19	14	14	11	12	12	15	22	27	21	25	23	19	14	14	11	12	12	15	22	27	21	25	23	19	14	14	11	12	12	15	35.2	35.2
Q9QZE5	Q9QZE5	30	30	27	Coatomer subunit gamma-1	Copg1	sp|Q9QZE5|COPG1_MOUSE Coatomer subunit gamma-1 OS=Mus musculus GN=Copg1 PE=1 SV=1	1	30	30	27	29	27	26	28	28	28	16	15	17	14	17	13	29	27	26	28	28	28	16	15	17	14	17	13	26	24	24	26	26	26	14	13	14	11	15	10	47.8	47.8
Q9R1C7;Q80W14	Q9R1C7	30;2	30;2	30;2	Pre-mRNA-processing factor 40 homolog A	Prpf40a	sp|Q9R1C7|PR40A_MOUSE Pre-mRNA-processing factor 40 homolog A OS=Mus musculus GN=Prpf40a PE=1 SV=1	2	30	30	30	26	27	24	26	23	23	16	16	15	12	15	17	26	27	24	26	23	23	16	16	15	12	15	17	26	27	24	26	23	23	16	16	15	12	15	17	36.9	36.9
Q9WUA3	Q9WUA3	30	30	28	ATP-dependent 6-phosphofructokinase, platelet type	Pfkp	sp|Q9WUA3|PFKAP_MOUSE ATP-dependent 6-phosphofructokinase, platelet type OS=Mus musculus GN=Pfkp PE=1 SV=1	1	30	30	28	24	26	21	27	29	27	16	14	11	11	20	19	24	26	21	27	29	27	16	14	11	11	20	19	22	24	19	25	27	25	14	13	10	10	19	18	49.9	49.9
B1AZI6	B1AZI6	29	29	29	THO complex subunit 2	Thoc2	sp|B1AZI6|THOC2_MOUSE THO complex subunit 2 OS=Mus musculus GN=Thoc2 PE=1 SV=1	1	29	29	29	25	25	22	24	23	23	9	9	6	9	12	12	25	25	22	24	23	23	9	9	6	9	12	12	25	25	22	24	23	23	9	9	6	9	12	12	23.2	23.2
E9Q309	E9Q309	29	29	29		Cep350	sp|E9Q309|CE350_MOUSE Centrosome-associated protein 350 OS=Mus musculus GN=Cep350 PE=1 SV=1	1	29	29	29	19	20	16	18	15	16	14	12	8	9	9	7	19	20	16	18	15	16	14	12	8	9	9	7	19	20	16	18	15	16	14	12	8	9	9	7	13	13
O55029	O55029	29	29	29	Coatomer subunit beta	Copb2	sp|O55029|COPB2_MOUSE Coatomer subunit beta OS=Mus musculus GN=Copb2 PE=1 SV=2	1	29	29	29	21	22	23	23	22	24	10	10	12	10	14	15	21	22	23	23	22	24	10	10	12	10	14	15	21	22	23	23	22	24	10	10	12	10	14	15	43.8	43.8
P09242	P09242	29	29	29	Alkaline phosphatase, tissue-nonspecific isozyme	Alpl	sp|P09242|PPBT_MOUSE Alkaline phosphatase, tissue-nonspecific isozyme OS=Mus musculus GN=Alpl PE=1 SV=2	1	29	29	29	28	27	25	26	28	29	22	18	17	18	21	19	28	27	25	26	28	29	22	18	17	18	21	19	28	27	25	26	28	29	22	18	17	18	21	19	58.4	58.4
P14148	P14148	29	29	29	60S ribosomal protein L7	Rpl7	sp|P14148|RL7_MOUSE 60S ribosomal protein L7 OS=Mus musculus GN=Rpl7 PE=1 SV=2	1	29	29	29	28	29	24	25	25	28	21	20	21	16	21	22	28	29	24	25	25	28	21	20	21	16	21	22	28	29	24	25	25	28	21	20	21	16	21	22	58.5	58.5
P24788;Q64434	P24788	29;1	29;1	29;1	Cyclin-dependent kinase 11B	Cdk11b	sp|P24788|CD11B_MOUSE Cyclin-dependent kinase 11B OS=Mus musculus GN=Cdk11b PE=1 SV=2	2	29	29	29	23	28	24	24	20	22	17	15	9	11	17	18	23	28	24	24	20	22	17	15	9	11	17	18	23	28	24	24	20	22	17	15	9	11	17	18	43	43
P32067	P32067	29	29	29	Lupus La protein homolog	Ssb	sp|P32067|LA_MOUSE Lupus La protein homolog OS=Mus musculus GN=Ssb PE=1 SV=1	1	29	29	29	27	27	22	26	26	27	16	19	15	15	20	21	27	27	22	26	26	27	16	19	15	15	20	21	27	27	22	26	26	27	16	19	15	15	20	21	57.8	57.8
P46061	P46061	29	29	29	Ran GTPase-activating protein 1	Rangap1	sp|P46061|RAGP1_MOUSE Ran GTPase-activating protein 1 OS=Mus musculus GN=Rangap1 PE=1 SV=2	1	29	29	29	25	25	23	23	23	25	17	16	15	11	17	14	25	25	23	23	23	25	17	16	15	11	17	14	25	25	23	23	23	25	17	16	15	11	17	14	51.4	51.4
P48025;P43404;Q8BZ25	P48025	29;1;1	29;1;1	29;1;1	Tyrosine-protein kinase SYK	Syk	sp|P48025|KSYK_MOUSE Tyrosine-protein kinase SYK OS=Mus musculus GN=Syk PE=1 SV=2	3	29	29	29	21	21	20	22	23	23	9	15	11	13	15	12	21	21	20	22	23	23	9	15	11	13	15	12	21	21	20	22	23	23	9	15	11	13	15	12	61.2	61.2
P50247	P50247	29	29	29	Adenosylhomocysteinase	Ahcy	sp|P50247|SAHH_MOUSE Adenosylhomocysteinase OS=Mus musculus GN=Ahcy PE=1 SV=3	1	29	29	29	28	29	25	28	24	26	14	13	15	13	17	17	28	29	25	28	24	26	14	13	15	13	17	17	28	29	25	28	24	26	14	13	15	13	17	17	67.1	67.1
P50580	P50580	29	29	29	Proliferation-associated protein 2G4	Pa2g4	sp|P50580|PA2G4_MOUSE Proliferation-associated protein 2G4 OS=Mus musculus GN=Pa2g4 PE=1 SV=3	1	29	29	29	26	28	21	25	25	26	16	16	15	11	17	15	26	28	21	25	25	26	16	16	15	11	17	15	26	28	21	25	25	26	16	16	15	11	17	15	75.6	75.6
P56480	P56480	29	29	29	ATP synthase subunit beta, mitochondrial	Atp5b	sp|P56480|ATPB_MOUSE ATP synthase subunit beta, mitochondrial OS=Mus musculus GN=Atp5b PE=1 SV=2	1	29	29	29	27	28	26	25	26	26	20	22	19	20	20	21	27	28	26	25	26	26	20	22	19	20	20	21	27	28	26	25	26	26	20	22	19	20	20	21	72.6	72.6
P97868	P97868	29	29	29	E3 ubiquitin-protein ligase RBBP6	Rbbp6	sp|P97868|RBBP6_MOUSE E3 ubiquitin-protein ligase RBBP6 OS=Mus musculus GN=Rbbp6 PE=1 SV=5	1	29	29	29	21	21	14	21	18	21	12	12	11	7	11	8	21	21	14	21	18	21	12	12	11	7	11	8	21	21	14	21	18	21	12	12	11	7	11	8	20.8	20.8
Q07113	Q07113	29	29	29	Cation-independent mannose-6-phosphate receptor	Igf2r	sp|Q07113|MPRI_MOUSE Cation-independent mannose-6-phosphate receptor OS=Mus musculus GN=Igf2r PE=1 SV=1	1	29	29	29	23	24	21	22	16	14	9	8	2	4	2	2	23	24	21	22	16	14	9	8	2	4	2	2	23	24	21	22	16	14	9	8	2	4	2	2	15	15
Q3U9G9	Q3U9G9	29	29	29	Lamin-B receptor	Lbr	sp|Q3U9G9|LBR_MOUSE Lamin-B receptor OS=Mus musculus GN=Lbr PE=1 SV=2	1	29	29	29	24	24	25	23	22	23	16	21	12	15	13	15	24	24	25	23	22	23	16	21	12	15	13	15	24	24	25	23	22	23	16	21	12	15	13	15	38	38
Q6NV83	Q6NV83	29	29	29	U2 snRNP-associated SURP motif-containing protein	U2surp	sp|Q6NV83|SR140_MOUSE U2 snRNP-associated SURP motif-containing protein OS=Mus musculus GN=U2surp PE=1 SV=3	1	29	29	29	24	26	20	20	21	21	13	13	10	9	13	12	24	26	20	20	21	21	13	13	10	9	13	12	24	26	20	20	21	21	13	13	10	9	13	12	31.1	31.1
Q6P542	Q6P542	29	29	29	ATP-binding cassette sub-family F member 1	Abcf1	sp|Q6P542|ABCF1_MOUSE ATP-binding cassette sub-family F member 1 OS=Mus musculus GN=Abcf1 PE=1 SV=1	1	29	29	29	23	19	20	23	27	23	17	18	16	14	17	18	23	19	20	23	27	23	17	18	16	14	17	18	23	19	20	23	27	23	17	18	16	14	17	18	45.3	45.3
Q6Y7W8	Q6Y7W8	29	29	29	PERQ amino acid-rich with GYF domain-containing protein 2	Gigyf2	sp|Q6Y7W8|GGYF2_MOUSE GRB10-interacting GYF protein 2 OS=Mus musculus GN=Gigyf2 PE=1 SV=2	1	29	29	29	24	22	21	23	23	22	14	12	11	11	14	13	24	22	21	23	23	22	14	12	11	11	14	13	24	22	21	23	23	22	14	12	11	11	14	13	28	28
Q7TSI3	Q7TSI3	29	29	29	Serine/threonine-protein phosphatase 6 regulatory subunit 1	Ppp6r1	sp|Q7TSI3|PP6R1_MOUSE Serine/threonine-protein phosphatase 6 regulatory subunit 1 OS=Mus musculus GN=Ppp6r1 PE=1 SV=1	1	29	29	29	26	27	22	26	27	26	15	9	16	10	15	14	26	27	22	26	27	26	15	9	16	10	15	14	26	27	22	26	27	26	15	9	16	10	15	14	48.2	48.2
Q80X82	Q80X82	29	29	29	Symplekin	Sympk	sp|Q80X82|SYMPK_MOUSE Symplekin OS=Mus musculus GN=Sympk PE=1 SV=1	1	29	29	29	25	25	19	21	19	18	14	14	13	12	16	11	25	25	19	21	19	18	14	14	13	12	16	11	25	25	19	21	19	18	14	14	13	12	16	11	28.3	28.3
Q80XI3	Q80XI3	34	29	29	Eukaryotic translation initiation factor 4 gamma 3	Eif4g3	sp|Q80XI3|IF4G3_MOUSE Eukaryotic translation initiation factor 4 gamma 3 OS=Mus musculus GN=Eif4g3 PE=1 SV=2	1	34	29	29	26	23	24	22	22	25	14	14	12	9	16	17	21	18	19	17	17	20	10	10	9	7	12	12	21	18	19	17	17	20	10	10	9	7	12	12	25.8	22.7
Q8BFY9	Q8BFY9	29	29	22	Transportin-1	Tnpo1	sp|Q8BFY9|TNPO1_MOUSE Transportin-1 OS=Mus musculus GN=Tnpo1 PE=1 SV=2	1	29	29	22	26	27	23	25	25	26	15	14	16	12	16	18	26	27	23	25	25	26	15	14	16	12	16	18	19	20	17	18	18	19	11	10	10	8	12	13	46.3	46.3
Q8BG32	Q8BG32	29	29	29	26S proteasome non-ATPase regulatory subunit 11	Psmd11	sp|Q8BG32|PSD11_MOUSE 26S proteasome non-ATPase regulatory subunit 11 OS=Mus musculus GN=Psmd11 PE=1 SV=3	1	29	29	29	27	26	28	26	27	27	19	17	21	17	21	22	27	26	28	26	27	27	19	17	21	17	21	22	27	26	28	26	27	27	19	17	21	17	21	22	67.3	67.3
Q8BH74	Q8BH74	29	29	29	Nuclear pore complex protein Nup107	Nup107	sp|Q8BH74|NU107_MOUSE Nuclear pore complex protein Nup107 OS=Mus musculus GN=Nup107 PE=1 SV=1	1	29	29	29	23	26	22	21	21	24	15	16	14	12	11	12	23	26	22	21	21	24	15	16	14	12	11	12	23	26	22	21	21	24	15	16	14	12	11	12	37.8	37.8
Q8BLH7	Q8BLH7	29	29	29	HIRA-interacting protein 3	Hirip3	sp|Q8BLH7|HIRP3_MOUSE HIRA-interacting protein 3 OS=Mus musculus GN=Hirip3 PE=1 SV=1	1	29	29	29	21	22	16	23	19	17	18	21	20	16	17	22	21	22	16	23	19	17	18	21	20	16	17	22	21	22	16	23	19	17	18	21	20	16	17	22	58.4	58.4
Q8BMA6	Q8BMA6	29	29	29	Signal recognition particle subunit SRP68	Srp68	sp|Q8BMA6|SRP68_MOUSE Signal recognition particle subunit SRP68 OS=Mus musculus GN=Srp68 PE=1 SV=2	1	29	29	29	24	26	22	26	20	24	15	18	16	16	17	17	24	26	22	26	20	24	15	18	16	16	17	17	24	26	22	26	20	24	15	18	16	16	17	17	55	55
Q8BMS1	Q8BMS1	29	29	29	Trifunctional enzyme subunit alpha, mitochondrial;Long-chain enoyl-CoA hydratase;Long chain 3-hydroxyacyl-CoA dehydrogenase	Hadha	sp|Q8BMS1|ECHA_MOUSE Trifunctional enzyme subunit alpha, mitochondrial OS=Mus musculus GN=Hadha PE=1 SV=1	1	29	29	29	21	23	21	24	23	23	17	14	15	13	15	18	21	23	21	24	23	23	17	14	15	13	15	18	21	23	21	24	23	23	17	14	15	13	15	18	54.1	54.1
Q8C156	Q8C156	29	29	29	Condensin complex subunit 2	Ncaph	sp|Q8C156|CND2_MOUSE Condensin complex subunit 2 OS=Mus musculus GN=Ncaph PE=1 SV=1	1	29	29	29	25	23	26	23	25	24	22	22	22	20	24	22	25	23	26	23	25	24	22	22	22	20	24	22	25	23	26	23	25	24	22	22	22	20	24	22	48.8	48.8
Q8CFQ3	Q8CFQ3	29	29	29	Intron-binding protein aquarius	Aqr	sp|Q8CFQ3|AQR_MOUSE Intron-binding protein aquarius OS=Mus musculus GN=Aqr PE=1 SV=2	1	29	29	29	23	26	25	22	24	23	9	12	8	6	10	6	23	26	25	22	24	23	9	12	8	6	10	6	23	26	25	22	24	23	9	12	8	6	10	6	28.7	28.7
Q8CGK3	Q8CGK3	29	29	29	Lon protease homolog, mitochondrial	Lonp1	sp|Q8CGK3|LONM_MOUSE Lon protease homolog, mitochondrial OS=Mus musculus GN=Lonp1 PE=1 SV=2	1	29	29	29	25	26	23	23	26	26	13	14	9	11	9	12	25	26	23	23	26	26	13	14	9	11	9	12	25	26	23	23	26	26	13	14	9	11	9	12	44.9	44.9
Q8CI94;Q9WUB3;Q9ET01	Q8CI94	29;6;3	29;6;3	29;6;3	Glycogen phosphorylase, brain form	Pygb	sp|Q8CI94|PYGB_MOUSE Glycogen phosphorylase, brain form OS=Mus musculus GN=Pygb PE=1 SV=3	3	29	29	29	23	25	21	20	25	24	8	9	5	7	12	13	23	25	21	20	25	24	8	9	5	7	12	13	23	25	21	20	25	24	8	9	5	7	12	13	39.5	39.5
Q8K1B8	Q8K1B8	29	29	29	Fermitin family homolog 3	Fermt3	sp|Q8K1B8|URP2_MOUSE Fermitin family homolog 3 OS=Mus musculus GN=Fermt3 PE=1 SV=1	1	29	29	29	24	25	26	27	23	28	14	16	12	11	14	11	24	25	26	27	23	28	14	16	12	11	14	11	24	25	26	27	23	28	14	16	12	11	14	11	54.6	54.6
Q99L45	Q99L45	29	29	29	Eukaryotic translation initiation factor 2 subunit 2	Eif2s2	sp|Q99L45|IF2B_MOUSE Eukaryotic translation initiation factor 2 subunit 2 OS=Mus musculus GN=Eif2s2 PE=1 SV=1	1	29	29	29	24	26	17	25	24	22	15	17	12	10	17	16	24	26	17	25	24	22	15	17	12	10	17	16	24	26	17	25	24	22	15	17	12	10	17	16	72.5	72.5
Q99LH1	Q99LH1	29	29	29	Nucleolar GTP-binding protein 2	Gnl2	sp|Q99LH1|NOG2_MOUSE Nucleolar GTP-binding protein 2 OS=Mus musculus GN=Gnl2 PE=1 SV=2	1	29	29	29	23	24	18	23	23	24	14	20	15	19	19	16	23	24	18	23	23	24	14	20	15	19	19	16	23	24	18	23	23	24	14	20	15	19	19	16	42.2	42.2
Q99MD9	Q99MD9	29	29	29	Nuclear autoantigenic sperm protein	Nasp	sp|Q99MD9|NASP_MOUSE Nuclear autoantigenic sperm protein OS=Mus musculus GN=Nasp PE=1 SV=2	1	29	29	29	25	26	23	25	27	27	17	14	10	10	22	18	25	26	23	25	27	27	17	14	10	10	22	18	25	26	23	25	27	27	17	14	10	10	22	18	48.3	48.3
Q99MN1	Q99MN1	29	29	29	Lysine--tRNA ligase	Kars	sp|Q99MN1|SYK_MOUSE Lysine--tRNA ligase OS=Mus musculus GN=Kars PE=1 SV=1	1	29	29	29	23	23	24	26	23	25	17	16	13	15	12	17	23	23	24	26	23	25	17	16	13	15	12	17	23	23	24	26	23	25	17	16	13	15	12	17	58.2	58.2
Q9D8E6	Q9D8E6	29	29	29	60S ribosomal protein L4	Rpl4	sp|Q9D8E6|RL4_MOUSE 60S ribosomal protein L4 OS=Mus musculus GN=Rpl4 PE=1 SV=3	1	29	29	29	28	28	28	28	28	28	20	19	16	16	21	22	28	28	28	28	28	28	20	19	16	16	21	22	28	28	28	28	28	28	20	19	16	16	21	22	53	53
Q9D8N0	Q9D8N0	29	29	29	Elongation factor 1-gamma	Eef1g	sp|Q9D8N0|EF1G_MOUSE Elongation factor 1-gamma OS=Mus musculus GN=Eef1g PE=1 SV=3	1	29	29	29	27	26	20	26	24	25	19	17	13	13	16	16	27	26	20	26	24	25	19	17	13	13	16	16	27	26	20	26	24	25	19	17	13	13	16	16	60.4	60.4
Q9DBE9	Q9DBE9	29	29	29	pre-rRNA processing protein FTSJ3	Ftsj3	sp|Q9DBE9|SPB1_MOUSE pre-rRNA processing protein FTSJ3 OS=Mus musculus GN=Ftsj3 PE=1 SV=1	1	29	29	29	24	25	23	22	24	25	22	22	22	21	16	19	24	25	23	22	24	25	22	22	22	21	16	19	24	25	23	22	24	25	22	22	22	21	16	19	42.8	42.8
Q9DBR1	Q9DBR1	29	29	29	5-3 exoribonuclease 2	Xrn2	sp|Q9DBR1|XRN2_MOUSE 5-3 exoribonuclease 2 OS=Mus musculus GN=Xrn2 PE=1 SV=1	1	29	29	29	21	27	21	23	21	24	11	11	12	11	15	13	21	27	21	23	21	24	11	11	12	11	15	13	21	27	21	23	21	24	11	11	12	11	15	13	43.7	43.7
Q9JHR7	Q9JHR7	29	29	29	Insulin-degrading enzyme	Ide	sp|Q9JHR7|IDE_MOUSE Insulin-degrading enzyme OS=Mus musculus GN=Ide PE=1 SV=1	1	29	29	29	24	26	27	25	26	24	5	4	6	8	12	7	24	26	27	25	26	24	5	4	6	8	12	7	24	26	27	25	26	24	5	4	6	8	12	7	33.8	33.8
Q9JJ28	Q9JJ28	29	29	29	Protein flightless-1 homolog	Flii	sp|Q9JJ28|FLII_MOUSE Protein flightless-1 homolog OS=Mus musculus GN=Flii PE=1 SV=1	1	29	29	29	22	22	16	21	25	26	13	8	9	5	14	16	22	22	16	21	25	26	13	8	9	5	14	16	22	22	16	21	25	26	13	8	9	5	14	16	32.4	32.4
Q9JLI8	Q9JLI8	29	29	29	Squamous cell carcinoma antigen recognized by T-cells 3	Sart3	sp|Q9JLI8|SART3_MOUSE Squamous cell carcinoma antigen recognized by T-cells 3 OS=Mus musculus GN=Sart3 PE=1 SV=1	1	29	29	29	26	26	25	22	24	26	11	7	6	5	13	14	26	26	25	22	24	26	11	7	6	5	13	14	26	26	25	22	24	26	11	7	6	5	13	14	36.3	36.3
Q9JMA1	Q9JMA1	29	29	29	Ubiquitin carboxyl-terminal hydrolase 14	Usp14	sp|Q9JMA1|UBP14_MOUSE Ubiquitin carboxyl-terminal hydrolase 14 OS=Mus musculus GN=Usp14 PE=1 SV=3	1	29	29	29	27	27	26	25	27	25	16	13	11	12	18	17	27	27	26	25	27	25	16	13	11	12	18	17	27	27	26	25	27	25	16	13	11	12	18	17	63.7	63.7
A2APB8	A2APB8	28	28	28	Targeting protein for Xklp2	Tpx2	sp|A2APB8|TPX2_MOUSE Targeting protein for Xklp2 OS=Mus musculus GN=Tpx2 PE=1 SV=1	1	28	28	28	17	17	19	18	17	20	19	18	19	21	16	17	17	17	19	18	17	20	19	18	19	21	16	17	17	17	19	18	17	20	19	18	19	21	16	17	40.3	40.3
B2RXR6	B2RXR6	28	28	27	Serine/threonine-protein phosphatase 6 regulatory ankyrin repeat subunit B	Ankrd44	sp|B2RXR6|ANR44_MOUSE Serine/threonine-protein phosphatase 6 regulatory ankyrin repeat subunit B OS=Mus musculus GN=Ankrd44 PE=1 SV=1	1	28	28	27	26	23	20	23	21	22	9	8	5	3	7	7	26	23	20	23	21	22	9	8	5	3	7	7	25	23	19	23	20	21	9	8	5	3	7	7	38.1	38.1
E9Q394	E9Q394	28	28	28		Akap13	sp|E9Q394|AKP13_MOUSE A-kinase anchor protein 13 OS=Mus musculus GN=Akap13 PE=1 SV=1	1	28	28	28	16	17	13	11	18	18	5	4	4	6	8	11	16	17	13	11	18	18	5	4	4	6	8	11	16	17	13	11	18	18	5	4	4	6	8	11	13.9	13.9
O35218	O35218	28	28	28	Cleavage and polyadenylation specificity factor subunit 2	Cpsf2	sp|O35218|CPSF2_MOUSE Cleavage and polyadenylation specificity factor subunit 2 OS=Mus musculus GN=Cpsf2 PE=1 SV=1	1	28	28	28	24	23	21	24	20	19	18	18	13	12	14	14	24	23	21	24	20	19	18	18	13	12	14	14	24	23	21	24	20	19	18	18	13	12	14	14	54.2	54.2
P52332;Q62120	P52332	28;1	28;1	27;1	Tyrosine-protein kinase JAK1	Jak1	sp|P52332|JAK1_MOUSE Tyrosine-protein kinase JAK1 OS=Mus musculus GN=Jak1 PE=1 SV=1	2	28	28	27	19	20	21	19	23	19	13	13	12	15	20	14	19	20	21	19	23	19	13	13	12	15	20	14	19	20	20	19	22	19	13	13	12	15	20	14	29.5	29.5
P62908	P62908	28	28	28	40S ribosomal protein S3	Rps3	sp|P62908|RS3_MOUSE 40S ribosomal protein S3 OS=Mus musculus GN=Rps3 PE=1 SV=1	1	28	28	28	28	27	21	25	25	27	20	17	17	14	18	18	28	27	21	25	25	27	20	17	17	14	18	18	28	27	21	25	25	27	20	17	17	14	18	18	85.2	85.2
Q3UPL0	Q3UPL0	28	28	28	Protein transport protein Sec31A	Sec31a	sp|Q3UPL0|SC31A_MOUSE Protein transport protein Sec31A OS=Mus musculus GN=Sec31a PE=1 SV=2	1	28	28	28	23	24	21	20	24	25	16	12	11	7	10	10	23	24	21	20	24	25	16	12	11	7	10	10	23	24	21	20	24	25	16	12	11	7	10	10	34	34
Q5SW19	Q5SW19	28	28	28	Clustered mitochondria protein homolog	Cluh	sp|Q5SW19|CLU_MOUSE Clustered mitochondria protein homolog OS=Mus musculus GN=Cluh PE=1 SV=2	1	28	28	28	24	23	19	23	22	22	8	10	6	4	11	9	24	23	19	23	22	22	8	10	6	4	11	9	24	23	19	23	22	22	8	10	6	4	11	9	28.2	28.2
Q61543	Q61543	28	28	28	Golgi apparatus protein 1	Glg1	sp|Q61543|GSLG1_MOUSE Golgi apparatus protein 1 OS=Mus musculus GN=Glg1 PE=1 SV=1	1	28	28	28	24	18	16	20	19	20	10	5	2	4	6	9	24	18	16	20	19	20	10	5	2	4	6	9	24	18	16	20	19	20	10	5	2	4	6	9	28.1	28.1
Q640M1	Q640M1	28	28	22	U3 small nucleolar RNA-associated protein 14 homolog A	Utp14a	sp|Q640M1|UT14A_MOUSE U3 small nucleolar RNA-associated protein 14 homolog A OS=Mus musculus GN=Utp14a PE=1 SV=1	1	28	28	22	22	23	19	19	18	16	18	19	18	18	15	20	22	23	19	19	18	16	18	19	18	18	15	20	19	18	16	16	15	12	14	15	15	16	13	16	46.7	46.7
Q6P4S8	Q6P4S8	28	28	28	Integrator complex subunit 1	Ints1	sp|Q6P4S8|INT1_MOUSE Integrator complex subunit 1 OS=Mus musculus GN=Ints1 PE=1 SV=2	1	28	28	28	19	20	19	22	20	23	6	8	7	6	10	8	19	20	19	22	20	23	6	8	7	6	10	8	19	20	19	22	20	23	6	8	7	6	10	8	16.9	16.9
Q6PGC1	Q6PGC1	28	28	28	ATP-dependent RNA helicase Dhx29	Dhx29	sp|Q6PGC1|DHX29_MOUSE ATP-dependent RNA helicase DHX29 OS=Mus musculus GN=Dhx29 PE=1 SV=1	1	28	28	28	23	22	22	22	18	20	4	9	3	3	8	7	23	22	22	22	18	20	4	9	3	3	8	7	23	22	22	22	18	20	4	9	3	3	8	7	24.3	24.3
Q6ZPY7	Q6ZPY7	28	28	27	Lysine-specific demethylase 3B	Kdm3b	sp|Q6ZPY7|KDM3B_MOUSE Lysine-specific demethylase 3B OS=Mus musculus GN=Kdm3b PE=1 SV=2	1	28	28	27	18	20	15	18	18	19	8	8	9	6	12	8	18	20	15	18	18	19	8	8	9	6	12	8	17	19	14	17	17	18	8	7	9	5	11	7	25.3	25.3
Q80U93	Q80U93	28	28	28	Nuclear pore complex protein Nup214	Nup214	sp|Q80U93|NU214_MOUSE Nuclear pore complex protein Nup214 OS=Mus musculus GN=Nup214 PE=1 SV=2	1	28	28	28	25	21	21	23	19	21	10	10	5	5	9	9	25	21	21	23	19	21	10	10	5	5	9	9	25	21	21	23	19	21	10	10	5	5	9	9	19.4	19.4
Q8BH04;Q9Z2V4	Q8BH04	28;1	28;1	28;1	Phosphoenolpyruvate carboxykinase [GTP], mitochondrial	Pck2	sp|Q8BH04|PCKGM_MOUSE Phosphoenolpyruvate carboxykinase [GTP], mitochondrial OS=Mus musculus GN=Pck2 PE=1 SV=1	2	28	28	28	25	24	25	25	25	26	10	10	10	10	12	15	25	24	25	25	25	26	10	10	10	10	12	15	25	24	25	25	25	26	10	10	10	10	12	15	62	62
Q8BPU7	Q8BPU7	28	28	25	Engulfment and cell motility protein 1	Elmo1	sp|Q8BPU7|ELMO1_MOUSE Engulfment and cell motility protein 1 OS=Mus musculus GN=Elmo1 PE=1 SV=2	1	28	28	25	26	25	20	25	22	26	16	15	13	10	17	17	26	25	20	25	22	26	16	15	13	10	17	17	23	22	18	23	20	24	13	12	10	7	14	14	45.8	45.8
Q8BWY9	Q8BWY9	28	28	28	Protein CIP2A	Kiaa1524	sp|Q8BWY9|CIP2A_MOUSE Protein CIP2A OS=Mus musculus GN=Kiaa1524 PE=1 SV=3	1	28	28	28	19	21	17	18	21	18	9	8	7	7	11	12	19	21	17	18	21	18	9	8	7	7	11	12	19	21	17	18	21	18	9	8	7	7	11	12	31	31
Q8C3Y4	Q8C3Y4	28	28	28	Kinetochore-associated protein 1	Kntc1	sp|Q8C3Y4|KNTC1_MOUSE Kinetochore-associated protein 1 OS=Mus musculus GN=Kntc1 PE=1 SV=2	1	28	28	28	21	22	19	18	18	17	14	11	15	11	12	14	21	22	19	18	18	17	14	11	15	11	12	14	21	22	19	18	18	17	14	11	15	11	12	14	15.4	15.4
Q8C547	Q8C547	28	28	28	HEAT repeat-containing protein 5B	Heatr5b	sp|Q8C547|HTR5B_MOUSE HEAT repeat-containing protein 5B OS=Mus musculus GN=Heatr5b PE=1 SV=3	1	28	28	28	22	17	20	20	22	22	7	9	3	6	10	7	22	17	20	20	22	22	7	9	3	6	10	7	22	17	20	20	22	22	7	9	3	6	10	7	20.1	20.1
Q8CHY6	Q8CHY6	28	28	27	Transcriptional repressor p66 alpha	Gatad2a	sp|Q8CHY6|P66A_MOUSE Transcriptional repressor p66 alpha OS=Mus musculus GN=Gatad2a PE=1 SV=2	1	28	28	27	19	20	20	20	19	19	21	15	15	21	17	17	19	20	20	20	19	19	21	15	15	21	17	17	18	19	19	19	18	18	20	15	15	20	17	17	59.8	59.8
Q8K284	Q8K284	28	28	28	General transcription factor 3C polypeptide 1	Gtf3c1	sp|Q8K284|TF3C1_MOUSE General transcription factor 3C polypeptide 1 OS=Mus musculus GN=Gtf3c1 PE=1 SV=2	1	28	28	28	17	19	16	16	19	19	7	9	6	5	5	8	17	19	16	16	19	19	7	9	6	5	5	8	17	19	16	16	19	19	7	9	6	5	5	8	22.6	22.6
Q8VEE4	Q8VEE4	28	28	28	Replication protein A 70 kDa DNA-binding subunit;Replication protein A 70 kDa DNA-binding subunit, N-terminally processed	Rpa1	sp|Q8VEE4|RFA1_MOUSE Replication protein A 70 kDa DNA-binding subunit OS=Mus musculus GN=Rpa1 PE=1 SV=1	1	28	28	28	23	20	19	22	23	24	17	17	16	12	20	17	23	20	19	22	23	24	17	17	16	12	20	17	23	20	19	22	23	24	17	17	16	12	20	17	54.4	54.4
Q91VD9	Q91VD9	28	28	28	NADH-ubiquinone oxidoreductase 75 kDa subunit, mitochondrial	Ndufs1	sp|Q91VD9|NDUS1_MOUSE NADH-ubiquinone oxidoreductase 75 kDa subunit, mitochondrial OS=Mus musculus GN=Ndufs1 PE=1 SV=2	1	28	28	28	26	25	22	23	22	25	13	11	11	11	14	14	26	25	22	23	22	25	13	11	11	11	14	14	26	25	22	23	22	25	13	11	11	11	14	14	53.2	53.2
Q922D4	Q922D4	28	28	28	Serine/threonine-protein phosphatase 6 regulatory subunit 3	Ppp6r3	sp|Q922D4|PP6R3_MOUSE Serine/threonine-protein phosphatase 6 regulatory subunit 3 OS=Mus musculus GN=Ppp6r3 PE=1 SV=1	1	28	28	28	25	25	24	24	24	24	17	15	12	13	18	13	25	25	24	24	24	24	17	15	12	13	18	13	25	25	24	24	24	24	17	15	12	13	18	13	38	38
Q924C1	Q924C1	28	28	28	Exportin-5	Xpo5	sp|Q924C1|XPO5_MOUSE Exportin-5 OS=Mus musculus GN=Xpo5 PE=1 SV=1	1	28	28	28	24	25	22	22	26	21	11	13	15	14	13	14	24	25	22	22	26	21	11	13	15	14	13	14	24	25	22	22	26	21	11	13	15	14	13	14	27.2	27.2
Q99JF8	Q99JF8	29	28	28	PC4 and SFRS1-interacting protein	Psip1	sp|Q99JF8|PSIP1_MOUSE PC4 and SFRS1-interacting protein OS=Mus musculus GN=Psip1 PE=1 SV=1	1	29	28	28	22	22	14	23	19	21	14	17	18	12	17	17	21	22	14	22	18	20	14	17	17	12	17	17	21	22	14	22	18	20	14	17	17	12	17	17	61	59.5
Q9CWK8	Q9CWK8	28	28	26	Sorting nexin-2	Snx2	sp|Q9CWK8|SNX2_MOUSE Sorting nexin-2 OS=Mus musculus GN=Snx2 PE=1 SV=2	1	28	28	26	25	23	22	25	26	26	21	18	18	15	22	21	25	23	22	25	26	26	21	18	18	15	22	21	23	22	20	23	24	24	19	16	17	14	20	19	56.1	56.1
Q9EPU4	Q9EPU4	28	28	28	Cleavage and polyadenylation specificity factor subunit 1	Cpsf1	sp|Q9EPU4|CPSF1_MOUSE Cleavage and polyadenylation specificity factor subunit 1 OS=Mus musculus GN=Cpsf1 PE=1 SV=1	1	28	28	28	22	23	20	21	21	22	8	11	7	10	11	11	22	23	20	21	21	22	8	11	7	10	11	11	22	23	20	21	21	22	8	11	7	10	11	11	20.2	20.2
Q9ES00	Q9ES00	28	28	28	Ubiquitin conjugation factor E4 B	Ube4b	sp|Q9ES00|UBE4B_MOUSE Ubiquitin conjugation factor E4 B OS=Mus musculus GN=Ube4b PE=1 SV=3	1	28	28	28	22	19	21	23	24	20	7	6	5	7	8	11	22	19	21	23	24	20	7	6	5	7	8	11	22	19	21	23	24	20	7	6	5	7	8	11	30.3	30.3
Q9QWT9	Q9QWT9	28	28	28	Kinesin-like protein KIFC1	Kifc1	sp|Q9QWT9|KIFC1_MOUSE Kinesin-like protein KIFC1 OS=Mus musculus GN=Kifc1 PE=1 SV=2	1	28	28	28	17	18	19	19	17	20	16	19	16	15	18	16	17	18	19	19	17	20	16	19	16	15	18	16	17	18	19	19	17	20	16	19	16	15	18	16	45.1	45.1
A2A432	A2A432	27	27	21	Cullin-4B	Cul4b	sp|A2A432|CUL4B_MOUSE Cullin-4B OS=Mus musculus GN=Cul4b PE=1 SV=1	1	27	27	21	21	23	20	24	24	21	16	12	10	10	12	14	21	23	20	24	24	21	16	12	10	10	12	14	16	17	16	18	18	16	12	9	7	7	8	10	29.8	29.8
B2RY56	B2RY56	27	27	27	RNA-binding protein 25	Rbm25	sp|B2RY56|RBM25_MOUSE RNA-binding protein 25 OS=Mus musculus GN=Rbm25 PE=1 SV=2	1	27	27	27	21	24	21	22	20	22	12	17	14	11	19	17	21	24	21	22	20	22	12	17	14	11	19	17	21	24	21	22	20	22	12	17	14	11	19	17	34.7	34.7
O08808	O08808	27	27	27	Protein diaphanous homolog 1	Diaph1	sp|O08808|DIAP1_MOUSE Protein diaphanous homolog 1 OS=Mus musculus GN=Diaph1 PE=1 SV=1	1	27	27	27	21	23	19	21	15	18	9	12	7	7	11	12	21	23	19	21	15	18	9	12	7	7	11	12	21	23	19	21	15	18	9	12	7	7	11	12	23.7	23.7
O35691	O35691	27	27	27	Pinin	Pnn	sp|O35691|PININ_MOUSE Pinin OS=Mus musculus GN=Pnn PE=1 SV=4	1	27	27	27	21	23	17	21	21	22	20	16	18	18	16	15	21	23	17	21	21	22	20	16	18	18	16	15	21	23	17	21	21	22	20	16	18	18	16	15	40.6	40.6
P14211	P14211	27	27	27	Calreticulin	Calr	sp|P14211|CALR_MOUSE Calreticulin OS=Mus musculus GN=Calr PE=1 SV=1	1	27	27	27	24	26	23	25	23	23	9	10	9	6	10	8	24	26	23	25	23	23	9	10	9	6	10	8	24	26	23	25	23	23	9	10	9	6	10	8	64.2	64.2
P24547	P24547	27	27	25	Inosine-5-monophosphate dehydrogenase 2	Impdh2	sp|P24547|IMDH2_MOUSE Inosine-5-monophosphate dehydrogenase 2 OS=Mus musculus GN=Impdh2 PE=1 SV=2	1	27	27	25	25	23	22	25	25	26	16	15	14	14	19	19	25	23	22	25	25	26	16	15	14	14	19	19	23	21	20	23	23	24	15	14	13	14	18	18	56.4	56.4
P26040	P26040	39	27	26	Ezrin	Ezr	sp|P26040|EZRI_MOUSE Ezrin OS=Mus musculus GN=Ezr PE=1 SV=3	1	39	27	26	36	36	31	36	38	34	7	7	4	5	8	11	24	24	20	25	27	24	4	3	2	2	4	8	23	23	20	25	26	23	4	3	2	2	4	8	53.9	39.9
P27612	P27612	27	27	27	Phospholipase A-2-activating protein	Plaa	sp|P27612|PLAP_MOUSE Phospholipase A-2-activating protein OS=Mus musculus GN=Plaa PE=1 SV=4	1	27	27	27	18	25	19	22	20	18	15	15	9	8	13	13	18	25	19	22	20	18	15	15	9	8	13	13	18	25	19	22	20	18	15	15	9	8	13	13	39.5	39.5
P27870	P27870	27	27	26	Proto-oncogene vav	Vav1	sp|P27870|VAV_MOUSE Proto-oncogene vav OS=Mus musculus GN=Vav1 PE=1 SV=1	1	27	27	26	21	24	21	24	20	24	13	13	11	10	15	14	21	24	21	24	20	24	13	13	11	10	15	14	20	23	20	23	19	23	12	12	10	9	15	14	37	37
P39054;P39053	P39054	27;5	27;5	18;2	Dynamin-2	Dnm2	sp|P39054|DYN2_MOUSE Dynamin-2 OS=Mus musculus GN=Dnm2 PE=1 SV=2	2	27	27	18	23	21	20	21	22	18	14	14	8	9	10	9	23	21	20	21	22	18	14	14	8	9	10	9	15	13	13	14	13	10	11	11	5	5	8	7	39.9	39.9
P47738;Q62148;P24549;O35945;Q9JHW9	P47738	27;2;1;1;1	27;2;1;1;1	26;1;0;0;0	Aldehyde dehydrogenase, mitochondrial	Aldh2	sp|P47738|ALDH2_MOUSE Aldehyde dehydrogenase, mitochondrial OS=Mus musculus GN=Aldh2 PE=1 SV=1	5	27	27	26	26	23	24	23	25	25	14	13	11	11	15	15	26	23	24	23	25	25	14	13	11	11	15	15	25	22	23	22	24	24	14	12	11	11	15	15	57.6	57.6
P53995	P53995	27	27	27	Anaphase-promoting complex subunit 1	Anapc1	sp|P53995|APC1_MOUSE Anaphase-promoting complex subunit 1 OS=Mus musculus GN=Anapc1 PE=1 SV=2	1	27	27	27	20	19	22	20	17	22	8	8	6	6	12	12	20	19	22	20	17	22	8	8	6	6	12	12	20	19	22	20	17	22	8	8	6	6	12	12	19.1	19.1
P54103	P54103	27	27	27	DnaJ homolog subfamily C member 2;DnaJ homolog subfamily C member 2, N-terminally processed	Dnajc2	sp|P54103|DNJC2_MOUSE DnaJ homolog subfamily C member 2 OS=Mus musculus GN=Dnajc2 PE=1 SV=2	1	27	27	27	24	25	21	24	22	19	15	13	14	12	15	13	24	25	21	24	22	19	15	13	14	12	15	13	24	25	21	24	22	19	15	13	14	12	15	13	47.2	47.2
P54775	P54775	27	27	27	26S protease regulatory subunit 6B	Psmc4	sp|P54775|PRS6B_MOUSE 26S proteasome regulatory subunit 6B OS=Mus musculus GN=Psmc4 PE=1 SV=2	1	27	27	27	22	24	22	25	24	23	16	10	9	10	17	17	22	24	22	25	24	23	16	10	9	10	17	17	22	24	22	25	24	23	16	10	9	10	17	17	72.2	72.2
P61222	P61222	27	27	27	ATP-binding cassette sub-family E member 1	Abce1	sp|P61222|ABCE1_MOUSE ATP-binding cassette sub-family E member 1 OS=Mus musculus GN=Abce1 PE=1 SV=1	1	27	27	27	23	20	19	18	21	20	12	13	9	12	14	15	23	20	19	18	21	20	12	13	9	12	14	15	23	20	19	18	21	20	12	13	9	12	14	15	50.1	50.1
P62702	P62702	27	27	27	40S ribosomal protein S4, X isoform	Rps4x	sp|P62702|RS4X_MOUSE 40S ribosomal protein S4, X isoform OS=Mus musculus GN=Rps4x PE=1 SV=2	1	27	27	27	25	24	25	24	24	24	19	19	16	15	19	16	25	24	25	24	24	24	19	19	16	15	19	16	25	24	25	24	24	24	19	19	16	15	19	16	68.8	68.8
P97386	P97386	27	27	27	DNA ligase 3	Lig3	sp|P97386|DNLI3_MOUSE DNA ligase 3 OS=Mus musculus GN=Lig3 PE=1 SV=2	1	27	27	27	19	20	19	18	20	19	12	9	10	8	15	11	19	20	19	18	20	19	12	9	10	8	15	11	19	20	19	18	20	19	12	9	10	8	15	11	29.7	29.7
Q3UDE2	Q3UDE2	27	27	27	Tubulin--tyrosine ligase-like protein 12	Ttll12	sp|Q3UDE2|TTL12_MOUSE Tubulin--tyrosine ligase-like protein 12 OS=Mus musculus GN=Ttll12 PE=1 SV=1	1	27	27	27	24	26	24	24	26	26	10	10	6	6	16	16	24	26	24	24	26	26	10	10	6	6	16	16	24	26	24	24	26	26	10	10	6	6	16	16	57.6	57.6
Q52KI8	Q52KI8	27	27	27	Serine/arginine repetitive matrix protein 1	Srrm1	sp|Q52KI8|SRRM1_MOUSE Serine/arginine repetitive matrix protein 1 OS=Mus musculus GN=Srrm1 PE=1 SV=2	1	27	27	27	21	22	12	20	19	21	15	16	14	12	17	15	21	22	12	20	19	21	15	16	14	12	17	15	21	22	12	20	19	21	15	16	14	12	17	15	33.1	33.1
Q5DW34	Q5DW34	27	27	26	Histone-lysine N-methyltransferase EHMT1	Ehmt1	sp|Q5DW34|EHMT1_MOUSE Histone-lysine N-methyltransferase EHMT1 OS=Mus musculus GN=Ehmt1 PE=1 SV=2	1	27	27	26	17	20	20	19	19	17	12	16	12	10	16	13	17	20	20	19	19	17	12	16	12	10	16	13	16	19	19	18	18	17	12	16	11	10	15	13	28.5	28.5
Q69ZR2	Q69ZR2	27	27	27	E3 ubiquitin-protein ligase HECTD1	Hectd1	sp|Q69ZR2|HECD1_MOUSE E3 ubiquitin-protein ligase HECTD1 OS=Mus musculus GN=Hectd1 PE=1 SV=2	1	27	27	27	21	20	14	21	18	18	9	10	6	5	11	11	21	20	14	21	18	18	9	10	6	5	11	11	21	20	14	21	18	18	9	10	6	5	11	11	14.1	14.1
Q6NZF1	Q6NZF1	27	27	27	Zinc finger CCCH domain-containing protein 11A	Zc3h11a	sp|Q6NZF1|ZC11A_MOUSE Zinc finger CCCH domain-containing protein 11A OS=Mus musculus GN=Zc3h11a PE=1 SV=1	1	27	27	27	23	23	15	21	21	22	14	12	13	15	14	12	23	23	15	21	21	22	14	12	13	15	14	12	23	23	15	21	21	22	14	12	13	15	14	12	45.1	45.1
Q6ZQF0	Q6ZQF0	27	27	27	DNA topoisomerase 2-binding protein 1	Topbp1	sp|Q6ZQF0|TOPB1_MOUSE DNA topoisomerase 2-binding protein 1 OS=Mus musculus GN=Topbp1 PE=1 SV=2	1	27	27	27	18	22	15	23	20	21	11	13	8	7	12	13	18	22	15	23	20	21	11	13	8	7	12	13	18	22	15	23	20	21	11	13	8	7	12	13	23.3	23.3
Q80TR8	Q80TR8	27	27	27	Protein VPRBP	Vprbp	sp|Q80TR8|DCAF1_MOUSE DDB1- and CUL4-associated factor 1 OS=Mus musculus GN=Dcaf1 PE=1 SV=4	1	27	27	27	20	20	18	22	24	23	13	6	6	11	12	7	20	20	18	22	24	23	13	6	6	11	12	7	20	20	18	22	24	23	13	6	6	11	12	7	22.8	22.8
Q80VW7	Q80VW7	27	27	27	AT-hook-containing transcription factor	Akna	sp|Q80VW7|AKNA_MOUSE AT-hook-containing transcription factor OS=Mus musculus GN=Akna PE=1 SV=1	1	27	27	27	17	19	14	16	15	14	12	15	14	15	16	15	17	19	14	16	15	14	12	15	14	15	16	15	17	19	14	16	15	14	12	15	14	15	16	15	28.6	28.6
Q8CDM1	Q8CDM1	27	27	27	ATPase family AAA domain-containing protein 2	Atad2	sp|Q8CDM1|ATAD2_MOUSE ATPase family AAA domain-containing protein 2 OS=Mus musculus GN=Atad2 PE=1 SV=1	1	27	27	27	17	19	14	16	22	20	9	7	10	6	9	11	17	19	14	16	22	20	9	7	10	6	9	11	17	19	14	16	22	20	9	7	10	6	9	11	34.2	34.2
Q8K4I3	Q8K4I3	27	27	24	Rho guanine nucleotide exchange factor 6	Arhgef6	sp|Q8K4I3|ARHG6_MOUSE Rho guanine nucleotide exchange factor 6 OS=Mus musculus GN=Arhgef6 PE=1 SV=1	1	27	27	24	23	23	21	19	26	25	14	10	5	7	15	12	23	23	21	19	26	25	14	10	5	7	15	12	20	20	18	16	23	22	12	8	4	5	13	10	46.6	46.6
Q8R5H1	Q8R5H1	29	27	27	Ubiquitin carboxyl-terminal hydrolase 15	Usp15	sp|Q8R5H1|UBP15_MOUSE Ubiquitin carboxyl-terminal hydrolase 15 OS=Mus musculus GN=Usp15 PE=1 SV=1	1	29	27	27	24	23	23	26	23	22	12	8	7	6	12	13	23	21	21	24	23	22	11	6	7	6	11	11	23	21	21	24	23	22	11	6	7	6	11	11	37.4	35.5
Q8VHK9	Q8VHK9	27	27	26	ATP-dependent RNA helicase DHX36	Dhx36	sp|Q8VHK9|DHX36_MOUSE ATP-dependent RNA helicase DHX36 OS=Mus musculus GN=Dhx36 PE=1 SV=2	1	27	27	26	23	22	19	19	20	19	14	13	10	9	9	14	23	22	19	19	20	19	14	13	10	9	9	14	22	22	19	19	19	19	14	13	10	9	9	13	35.2	35.2
Q921G8	Q921G8	27	27	27	Gamma-tubulin complex component 2	Tubgcp2	sp|Q921G8|GCP2_MOUSE Gamma-tubulin complex component 2 OS=Mus musculus GN=Tubgcp2 PE=1 SV=2	1	27	27	27	22	22	14	20	17	20	16	14	14	14	14	14	22	22	14	20	17	20	16	14	14	14	14	14	22	22	14	20	17	20	16	14	14	14	14	14	39	39
Q99M31	Q99M31	27	27	27	Heat shock 70 kDa protein 14	Hspa14	sp|Q99M31|HSP7E_MOUSE Heat shock 70 kDa protein 14 OS=Mus musculus GN=Hspa14 PE=1 SV=2	1	27	27	27	23	23	22	23	24	24	12	14	9	8	15	17	23	23	22	23	24	24	12	14	9	8	15	17	23	23	22	23	24	24	12	14	9	8	15	17	58.5	58.5
Q99ME9	Q99ME9	27	27	27	Nucleolar GTP-binding protein 1	Gtpbp4	sp|Q99ME9|NOG1_MOUSE Nucleolar GTP-binding protein 1 OS=Mus musculus GN=Gtpbp4 PE=1 SV=3	1	27	27	27	24	23	20	23	23	23	23	23	22	17	17	17	24	23	20	23	23	23	23	23	22	17	17	17	24	23	20	23	23	23	23	23	22	17	17	17	42.4	42.4
Q9DBR0	Q9DBR0	27	27	27	A-kinase anchor protein 8	Akap8	sp|Q9DBR0|AKAP8_MOUSE A-kinase anchor protein 8 OS=Mus musculus GN=Akap8 PE=1 SV=1	1	27	27	27	21	22	17	23	21	20	13	15	10	7	10	10	21	22	17	23	21	20	13	15	10	7	10	10	21	22	17	23	21	20	13	15	10	7	10	10	49.2	49.2
Q9EQ32	Q9EQ32	27	27	27	Phosphoinositide 3-kinase adapter protein 1	Pik3ap1	sp|Q9EQ32|BCAP_MOUSE Phosphoinositide 3-kinase adapter protein 1 OS=Mus musculus GN=Pik3ap1 PE=1 SV=1	1	27	27	27	21	23	17	22	22	21	15	11	11	8	14	16	21	23	17	22	22	21	15	11	11	8	14	16	21	23	17	22	22	21	15	11	11	8	14	16	44.6	44.6
Q9EQH2	Q9EQH2	27	27	27	Endoplasmic reticulum aminopeptidase 1	Erap1	sp|Q9EQH2|ERAP1_MOUSE Endoplasmic reticulum aminopeptidase 1 OS=Mus musculus GN=Erap1 PE=1 SV=2	1	27	27	27	23	27	22	26	24	25	10	9	13	9	10	11	23	27	22	26	24	25	10	9	13	9	10	11	23	27	22	26	24	25	10	9	13	9	10	11	34.8	34.8
Q9EQH3	Q9EQH3	27	27	27	Vacuolar protein sorting-associated protein 35	Vps35	sp|Q9EQH3|VPS35_MOUSE Vacuolar protein sorting-associated protein 35 OS=Mus musculus GN=Vps35 PE=1 SV=1	1	27	27	27	24	21	18	20	19	22	9	9	6	6	11	11	24	21	18	20	19	22	9	9	6	6	11	11	24	21	18	20	19	22	9	9	6	6	11	11	37.7	37.7
Q9JL35	Q9JL35	27	27	27	High mobility group nucleosome-binding domain-containing protein 5	Hmgn5	sp|Q9JL35|HMGN5_MOUSE High mobility group nucleosome-binding domain-containing protein 5 OS=Mus musculus GN=Hmgn5 PE=1 SV=2	1	27	27	27	25	25	15	24	18	20	1	1	0	0	1	1	25	25	15	24	18	20	1	1	0	0	1	1	25	25	15	24	18	20	1	1	0	0	1	1	75.1	75.1
Q9JLQ2	Q9JLQ2	27	27	23	ARF GTPase-activating protein GIT2	Git2	sp|Q9JLQ2|GIT2_MOUSE ARF GTPase-activating protein GIT2 OS=Mus musculus GN=Git2 PE=1 SV=2	1	27	27	23	24	25	17	22	20	20	13	12	6	3	7	8	24	25	17	22	20	20	13	12	6	3	7	8	21	21	14	19	17	17	9	9	5	2	5	6	54.9	54.9
Q9WUA2	Q9WUA2	27	27	27	Phenylalanine--tRNA ligase beta subunit	Farsb	sp|Q9WUA2|SYFB_MOUSE Phenylalanine--tRNA ligase beta subunit OS=Mus musculus GN=Farsb PE=1 SV=2	1	27	27	27	24	25	18	24	24	25	18	16	10	11	19	20	24	25	18	24	24	25	18	16	10	11	19	20	24	25	18	24	24	25	18	16	10	11	19	20	51.8	51.8
Q9Z0R6	Q9Z0R6	27	27	25	Intersectin-2	Itsn2	sp|Q9Z0R6|ITSN2_MOUSE Intersectin-2 OS=Mus musculus GN=Itsn2 PE=1 SV=2	1	27	27	25	20	23	22	22	16	17	12	6	8	6	9	10	20	23	22	22	16	17	12	6	8	6	9	10	19	22	20	20	16	15	12	6	7	5	7	10	21.3	21.3
Q9Z1S0	Q9Z1S0	27	27	27	Mitotic checkpoint serine/threonine-protein kinase BUB1 beta	Bub1b	sp|Q9Z1S0|BUB1B_MOUSE Mitotic checkpoint serine/threonine-protein kinase BUB1 beta OS=Mus musculus GN=Bub1b PE=1 SV=2	1	27	27	27	18	19	18	21	23	22	9	9	7	4	14	10	18	19	18	21	23	22	9	9	7	4	14	10	18	19	18	21	23	22	9	9	7	4	14	10	30.1	30.1
B1AY13	B1AY13	26	26	26	Ubiquitin carboxyl-terminal hydrolase 24	Usp24	sp|B1AY13|UBP24_MOUSE Ubiquitin carboxyl-terminal hydrolase 24 OS=Mus musculus GN=Usp24 PE=1 SV=1	1	26	26	26	17	18	14	19	14	16	11	9	7	3	12	10	17	18	14	19	14	16	11	9	7	3	12	10	17	18	14	19	14	16	11	9	7	3	12	10	13.3	13.3
O08528;Q91W97;Q3TRM8	O08528	26;1;1	26;1;1	23;0;1	Hexokinase-2	Hk2	sp|O08528|HXK2_MOUSE Hexokinase-2 OS=Mus musculus GN=Hk2 PE=1 SV=1	3	26	26	23	25	21	18	24	22	22	12	7	3	4	10	8	25	21	18	24	22	22	12	7	3	4	10	8	23	19	16	21	20	19	10	6	3	4	9	8	29.6	29.6
O08553;Q62188;P97427	O08553	26;4;3	26;4;3	26;4;3	Dihydropyrimidinase-related protein 2	Dpysl2	sp|O08553|DPYL2_MOUSE Dihydropyrimidinase-related protein 2 OS=Mus musculus GN=Dpysl2 PE=1 SV=2	3	26	26	26	25	24	24	25	24	24	17	19	12	15	19	18	25	24	24	25	24	24	17	19	12	15	19	18	25	24	24	25	24	24	17	19	12	15	19	18	68.2	68.2
O88685	O88685	26	26	26	26S protease regulatory subunit 6A	Psmc3	sp|O88685|PRS6A_MOUSE 26S proteasome regulatory subunit 6A OS=Mus musculus GN=Psmc3 PE=1 SV=2	1	26	26	26	24	26	18	21	23	25	16	12	14	13	21	18	24	26	18	21	23	25	16	12	14	13	21	18	24	26	18	21	23	25	16	12	14	13	21	18	64.5	64.5
P24270	P24270	26	26	26	Catalase	Cat	sp|P24270|CATA_MOUSE Catalase OS=Mus musculus GN=Cat PE=1 SV=4	1	26	26	26	23	25	21	26	24	26	11	11	7	7	14	16	23	25	21	26	24	26	11	11	7	7	14	16	23	25	21	26	24	26	11	11	7	7	14	16	64.5	64.5
P24527	P24527	26	26	26	Leukotriene A-4 hydrolase	Lta4h	sp|P24527|LKHA4_MOUSE Leukotriene A-4 hydrolase OS=Mus musculus GN=Lta4h PE=1 SV=4	1	26	26	26	20	21	22	21	24	24	2	4	2	2	5	7	20	21	22	21	24	24	2	4	2	2	5	7	20	21	22	21	24	24	2	4	2	2	5	7	48.1	48.1
P41230;Q62240	P41230	26;3	26;3	25;2	Lysine-specific demethylase 5C	Kdm5c	sp|P41230|KDM5C_MOUSE Lysine-specific demethylase 5C OS=Mus musculus GN=Kdm5c PE=1 SV=4	2	26	26	25	17	16	12	14	20	20	6	2	4	0	11	8	17	16	12	14	20	20	6	2	4	0	11	8	16	15	11	14	20	19	5	2	3	0	10	7	25.1	25.1
P53564	P53564	26	26	9	Homeobox protein cut-like 1	Cux1	sp|P53564|CUX1_MOUSE Homeobox protein cut-like 1 OS=Mus musculus GN=Cux1 PE=1 SV=3	1	26	26	9	18	17	12	18	21	19	18	13	11	14	11	15	18	17	12	18	21	19	18	13	11	14	11	15	4	4	4	6	7	5	6	5	3	4	6	5	21.6	21.6
P62192	P62192	26	26	26	26S protease regulatory subunit 4	Psmc1	sp|P62192|PRS4_MOUSE 26S proteasome regulatory subunit 4 OS=Mus musculus GN=Psmc1 PE=1 SV=1	1	26	26	26	25	25	21	23	24	23	16	13	15	10	15	17	25	25	21	23	24	23	16	13	15	10	15	17	25	25	21	23	24	23	16	13	15	10	15	17	70	70
P70206;Q80UG2;P70207	P70206	26;6;4	26;6;4	21;2;0	Plexin-A1	Plxna1	sp|P70206|PLXA1_MOUSE Plexin-A1 OS=Mus musculus GN=Plxna1 PE=1 SV=1	3	26	26	21	19	18	18	21	20	23	8	8	6	5	10	11	19	18	18	21	20	23	8	8	6	5	10	11	16	14	13	16	15	18	6	6	5	3	9	9	16.6	16.6
P80313	P80313	26	26	26	T-complex protein 1 subunit eta	Cct7	sp|P80313|TCPH_MOUSE T-complex protein 1 subunit eta OS=Mus musculus GN=Cct7 PE=1 SV=1	1	26	26	26	24	25	23	24	23	25	19	16	13	14	16	14	24	25	23	24	23	25	19	16	13	14	16	14	24	25	23	24	23	25	19	16	13	14	16	14	58.6	58.6
P97313	P97313	26	26	26	DNA-dependent protein kinase catalytic subunit	Prkdc	sp|P97313|PRKDC_MOUSE DNA-dependent protein kinase catalytic subunit OS=Mus musculus GN=Prkdc PE=1 SV=3	1	26	26	26	19	19	18	16	15	15	4	8	5	5	7	5	19	19	18	16	15	15	4	8	5	5	7	5	19	19	18	16	15	15	4	8	5	5	7	5	7.2	7.2
Q3UYV9	Q3UYV9	26	26	26	Nuclear cap-binding protein subunit 1	Ncbp1	sp|Q3UYV9|NCBP1_MOUSE Nuclear cap-binding protein subunit 1 OS=Mus musculus GN=Ncbp1 PE=1 SV=2	1	26	26	26	21	21	17	22	20	18	10	13	8	4	13	11	21	21	17	22	20	18	10	13	8	4	13	11	21	21	17	22	20	18	10	13	8	4	13	11	41.5	41.5
Q5DTM8	Q5DTM8	26	26	24	E3 ubiquitin-protein ligase BRE1A	Rnf20	sp|Q5DTM8|BRE1A_MOUSE E3 ubiquitin-protein ligase BRE1A OS=Mus musculus GN=Rnf20 PE=1 SV=2	1	26	26	24	21	23	23	20	23	21	10	13	9	9	14	15	21	23	23	20	23	21	10	13	9	9	14	15	19	21	21	19	21	20	10	12	9	9	14	14	34.2	34.2
Q60790	Q60790	26	26	25	Ras GTPase-activating protein 3	Rasa3	sp|Q60790|RASA3_MOUSE Ras GTPase-activating protein 3 OS=Mus musculus GN=Rasa3 PE=1 SV=2	1	26	26	25	21	21	18	19	20	16	9	10	8	7	12	6	21	21	18	19	20	16	9	10	8	7	12	6	20	20	17	18	19	15	8	9	7	6	11	5	38	38
Q60953	Q60953	26	26	26	Protein PML	Pml	sp|Q60953|PML_MOUSE Protein PML OS=Mus musculus GN=Pml PE=1 SV=3	1	26	26	26	24	25	20	20	23	23	11	12	10	10	13	12	24	25	20	20	23	23	11	12	10	10	13	12	24	25	20	20	23	23	11	12	10	10	13	12	45.9	45.9
Q60973	Q60973	26	26	17	Histone-binding protein RBBP7	Rbbp7	sp|Q60973|RBBP7_MOUSE Histone-binding protein RBBP7 OS=Mus musculus GN=Rbbp7 PE=1 SV=1	1	26	26	17	25	25	23	23	25	23	18	20	17	19	16	19	25	25	23	23	25	23	18	20	17	19	16	19	17	17	17	16	17	16	13	14	11	13	12	14	80.5	80.5
Q61043	Q61043	26	26	26	Ninein	Nin	sp|Q61043|NIN_MOUSE Ninein OS=Mus musculus GN=Nin PE=1 SV=3	1	26	26	26	17	12	17	17	15	15	10	9	10	10	11	15	17	12	17	17	15	15	10	9	10	10	11	15	17	12	17	17	15	15	10	9	10	10	11	15	15.9	15.9
Q61584	Q61584	26	26	24	Fragile X mental retardation syndrome-related protein 1	Fxr1	sp|Q61584|FXR1_MOUSE Fragile X mental retardation syndrome-related protein 1 OS=Mus musculus GN=Fxr1 PE=1 SV=2	1	26	26	24	22	20	20	20	21	21	14	9	9	6	10	12	22	20	20	20	21	21	14	9	9	6	10	12	20	18	19	18	19	19	12	7	8	5	8	10	47	47
Q61655;Q9QY15	Q61655	26;1	26;1	26;1	ATP-dependent RNA helicase DDX19A	Ddx19a	sp|Q61655|DD19A_MOUSE ATP-dependent RNA helicase DDX19A OS=Mus musculus GN=Ddx19a PE=1 SV=2	2	26	26	26	22	21	18	19	20	20	10	12	9	9	12	13	22	21	18	19	20	20	10	12	9	9	12	13	22	21	18	19	20	20	10	12	9	9	12	13	52.1	52.1
Q61753	Q61753	26	26	26	D-3-phosphoglycerate dehydrogenase	Phgdh	sp|Q61753|SERA_MOUSE D-3-phosphoglycerate dehydrogenase OS=Mus musculus GN=Phgdh PE=1 SV=3	1	26	26	26	24	25	25	25	24	24	20	18	19	15	24	22	24	25	25	25	24	24	20	18	19	15	24	22	24	25	25	25	24	24	20	18	19	15	24	22	51.4	51.4
Q64701	Q64701	26	26	26	Retinoblastoma-like protein 1	Rbl1	sp|Q64701|RBL1_MOUSE Retinoblastoma-like protein 1 OS=Mus musculus GN=Rbl1 PE=1 SV=3	1	26	26	26	20	15	17	17	18	20	13	12	7	7	13	8	20	15	17	17	18	20	13	12	7	7	13	8	20	15	17	17	18	20	13	12	7	7	13	8	30	30
Q64727	Q64727	26	26	26	Vinculin	Vcl	sp|Q64727|VINC_MOUSE Vinculin OS=Mus musculus GN=Vcl PE=1 SV=4	1	26	26	26	16	15	13	18	25	23	1	1	3	1	4	6	16	15	13	18	25	23	1	1	3	1	4	6	16	15	13	18	25	23	1	1	3	1	4	6	29.8	29.8
Q6IRU2	Q6IRU2	26	26	23	Tropomyosin alpha-4 chain	Tpm4	sp|Q6IRU2|TPM4_MOUSE Tropomyosin alpha-4 chain OS=Mus musculus GN=Tpm4 PE=1 SV=3	1	26	26	23	23	26	21	23	24	25	13	13	11	13	14	14	23	26	21	23	24	25	13	13	11	13	14	14	20	23	18	21	21	22	10	11	9	11	12	11	66.9	66.9
Q6P5D4	Q6P5D4	26	26	26	Centrosomal protein of 135 kDa	Cep135	sp|Q6P5D4|CP135_MOUSE Centrosomal protein of 135 kDa OS=Mus musculus GN=Cep135 PE=1 SV=1	1	26	26	26	12	16	19	16	13	17	16	13	10	8	14	13	12	16	19	16	13	17	16	13	10	8	14	13	12	16	19	16	13	17	16	13	10	8	14	13	26.5	26.5
Q80UG5	Q80UG5	26	26	26	Septin-9	2009-09-01	sp|Q80UG5|SEPT9_MOUSE Septin-9 OS=Mus musculus GN=Sept9 PE=1 SV=1	1	26	26	26	21	21	20	23	22	22	10	12	9	8	14	10	21	21	20	23	22	22	10	12	9	8	14	10	21	21	20	23	22	22	10	12	9	8	14	10	51.3	51.3
Q80WJ7	Q80WJ7	26	26	26	Protein LYRIC	Mtdh	sp|Q80WJ7|LYRIC_MOUSE Protein LYRIC OS=Mus musculus GN=Mtdh PE=1 SV=1	1	26	26	26	24	26	18	20	22	23	12	17	15	13	14	18	24	26	18	20	22	23	12	17	15	13	14	18	24	26	18	20	22	23	12	17	15	13	14	18	46.5	46.5
Q810B6	Q810B6	26	26	26	Rabankyrin-5	Ankfy1	sp|Q810B6|ANFY1_MOUSE Rabankyrin-5 OS=Mus musculus GN=Ankfy1 PE=1 SV=2	1	26	26	26	22	19	19	22	18	18	11	11	4	8	8	13	22	19	19	22	18	18	11	11	4	8	8	13	22	19	19	22	18	18	11	11	4	8	8	13	32.4	32.4
Q8BFR5	Q8BFR5	26	26	26	Elongation factor Tu, mitochondrial	Tufm	sp|Q8BFR5|EFTU_MOUSE Elongation factor Tu, mitochondrial OS=Mus musculus GN=Tufm PE=1 SV=1	1	26	26	26	25	23	21	22	23	25	14	13	12	10	12	16	25	23	21	22	23	25	14	13	12	10	12	16	25	23	21	22	23	25	14	13	12	10	12	16	56.2	56.2
Q8BJS4	Q8BJS4	26	26	26	SUN domain-containing protein 2	Sun2	sp|Q8BJS4|SUN2_MOUSE SUN domain-containing protein 2 OS=Mus musculus GN=Sun2 PE=1 SV=3	1	26	26	26	22	23	20	24	24	24	16	17	11	12	18	19	22	23	20	24	24	24	16	17	11	12	18	19	22	23	20	24	24	24	16	17	11	12	18	19	49.1	49.1
Q8BKS9	Q8BKS9	26	26	26	Pumilio domain-containing protein KIAA0020	Kiaa0020	sp|Q8BKS9|PUM3_MOUSE Pumilio homolog 3 OS=Mus musculus GN=Pum3 PE=1 SV=2	1	26	26	26	21	21	21	21	21	20	18	17	16	11	15	14	21	21	21	21	21	20	18	17	16	11	15	14	21	21	21	21	21	20	18	17	16	11	15	14	46.4	46.4
Q8BP47	Q8BP47	26	26	26	Asparagine--tRNA ligase, cytoplasmic	Nars	sp|Q8BP47|SYNC_MOUSE Asparagine--tRNA ligase, cytoplasmic OS=Mus musculus GN=Nars PE=1 SV=2	1	26	26	26	25	25	24	23	23	24	13	16	12	14	16	17	25	25	24	23	23	24	13	16	12	14	16	17	25	25	24	23	23	24	13	16	12	14	16	17	52.8	52.8
Q8BQ30	Q8BQ30	26	26	26	Phostensin	Ppp1r18	sp|Q8BQ30|PPR18_MOUSE Phostensin OS=Mus musculus GN=Ppp1r18 PE=1 SV=1	1	26	26	26	22	17	18	21	19	21	8	8	6	4	10	10	22	17	18	21	19	21	8	8	6	4	10	10	22	17	18	21	19	21	8	8	6	4	10	10	54.4	54.4
Q8CHG3	Q8CHG3	26	26	26	GRIP and coiled-coil domain-containing protein 2	Gcc2	sp|Q8CHG3|GCC2_MOUSE GRIP and coiled-coil domain-containing protein 2 OS=Mus musculus GN=Gcc2 PE=1 SV=2	1	26	26	26	18	19	13	13	20	18	4	3	0	3	7	7	18	19	13	13	20	18	4	3	0	3	7	7	18	19	13	13	20	18	4	3	0	3	7	7	17	17
Q8K2B3	Q8K2B3	26	26	26	Succinate dehydrogenase [ubiquinone] flavoprotein subunit, mitochondrial	Sdha	sp|Q8K2B3|SDHA_MOUSE Succinate dehydrogenase [ubiquinone] flavoprotein subunit, mitochondrial OS=Mus musculus GN=Sdha PE=1 SV=1	1	26	26	26	24	25	24	25	26	24	8	2	6	4	5	4	24	25	24	25	26	24	8	2	6	4	5	4	24	25	24	25	26	24	8	2	6	4	5	4	58.7	58.7
Q8QZY1	Q8QZY1	26	26	26	Eukaryotic translation initiation factor 3 subunit L	Eif3l	sp|Q8QZY1|EIF3L_MOUSE Eukaryotic translation initiation factor 3 subunit L OS=Mus musculus GN=Eif3l PE=1 SV=1	1	26	26	26	25	22	24	23	24	25	16	16	10	8	16	17	25	22	24	23	24	25	16	16	10	8	16	17	25	22	24	23	24	25	16	16	10	8	16	17	49.3	49.3
Q91WM1	Q91WM1	31	26	26	Spermatid perinuclear RNA-binding protein	Strbp	sp|Q91WM1|STRBP_MOUSE Spermatid perinuclear RNA-binding protein OS=Mus musculus GN=Strbp PE=1 SV=1	1	31	26	26	26	29	23	26	25	27	15	17	16	17	17	19	21	25	19	21	21	22	11	15	13	14	13	15	21	25	19	21	21	22	11	15	13	14	13	15	49.1	44
Q99JI4	Q99JI4	26	26	26	26S proteasome non-ATPase regulatory subunit 6	Psmd6	sp|Q99JI4|PSMD6_MOUSE 26S proteasome non-ATPase regulatory subunit 6 OS=Mus musculus GN=Psmd6 PE=1 SV=1	1	26	26	26	21	19	18	17	19	19	11	11	13	10	13	15	21	19	18	17	19	19	11	11	13	10	13	15	21	19	18	17	19	19	11	11	13	10	13	15	51.9	51.9
Q99P88	Q99P88	26	26	26	Nuclear pore complex protein Nup155	Nup155	sp|Q99P88|NU155_MOUSE Nuclear pore complex protein Nup155 OS=Mus musculus GN=Nup155 PE=1 SV=1	1	26	26	26	22	21	24	17	20	20	13	11	11	4	9	8	22	21	24	17	20	20	13	11	11	4	9	8	22	21	24	17	20	20	13	11	11	4	9	8	25.6	25.6
Q9D0F1	Q9D0F1	26	26	26	Kinetochore protein NDC80 homolog	Ndc80	sp|Q9D0F1|NDC80_MOUSE Kinetochore protein NDC80 homolog OS=Mus musculus GN=Ndc80 PE=1 SV=1	1	26	26	26	19	22	15	21	19	20	16	16	14	12	15	17	19	22	15	21	19	20	16	16	14	12	15	17	19	22	15	21	19	20	16	16	14	12	15	17	47.8	47.8
Q9D554	Q9D554	26	26	26	Splicing factor 3A subunit 3	Sf3a3	sp|Q9D554|SF3A3_MOUSE Splicing factor 3A subunit 3 OS=Mus musculus GN=Sf3a3 PE=1 SV=2	1	26	26	26	19	23	18	23	19	17	13	11	10	7	13	12	19	23	18	23	19	17	13	11	10	7	13	12	19	23	18	23	19	17	13	11	10	7	13	12	60.3	60.3
Q9D706	Q9D706	26	26	26	RNA polymerase II-associated protein 3	Rpap3	sp|Q9D706|RPAP3_MOUSE RNA polymerase II-associated protein 3 OS=Mus musculus GN=Rpap3 PE=1 SV=1	1	26	26	26	22	21	19	17	23	18	15	12	9	12	12	14	22	21	19	17	23	18	15	12	9	12	12	14	22	21	19	17	23	18	15	12	9	12	12	14	43.2	43.2
Q9DBR7	Q9DBR7	26	26	24	Protein phosphatase 1 regulatory subunit 12A	Ppp1r12a	sp|Q9DBR7|MYPT1_MOUSE Protein phosphatase 1 regulatory subunit 12A OS=Mus musculus GN=Ppp1r12a PE=1 SV=2	1	26	26	24	21	21	13	24	20	19	8	7	3	5	9	4	21	21	13	24	20	19	8	7	3	5	9	4	19	20	12	22	19	18	8	7	2	5	9	4	31.9	31.9
Q9DCL9	Q9DCL9	26	26	26	Multifunctional protein ADE2;Phosphoribosylaminoimidazole-succinocarboxamide synthase;Phosphoribosylaminoimidazole carboxylase	Paics	sp|Q9DCL9|PUR6_MOUSE Multifunctional protein ADE2 OS=Mus musculus GN=Paics PE=1 SV=4	1	26	26	26	23	24	19	23	24	25	14	11	12	11	11	13	23	24	19	23	24	25	14	11	12	11	11	13	23	24	19	23	24	25	14	11	12	11	11	13	68.7	68.7
Q9JJY4	Q9JJY4	26	26	26	Probable ATP-dependent RNA helicase DDX20	Ddx20	sp|Q9JJY4|DDX20_MOUSE Probable ATP-dependent RNA helicase DDX20 OS=Mus musculus GN=Ddx20 PE=1 SV=2	1	26	26	26	25	25	21	23	26	25	19	16	15	12	10	16	25	25	21	23	26	25	19	16	15	12	10	16	25	25	21	23	26	25	19	16	15	12	10	16	42.9	42.9
Q9WTM5	Q9WTM5	26	26	26	RuvB-like 2	Ruvbl2	sp|Q9WTM5|RUVB2_MOUSE RuvB-like 2 OS=Mus musculus GN=Ruvbl2 PE=1 SV=3	1	26	26	26	23	24	18	21	22	21	16	22	15	16	20	19	23	24	18	21	22	21	16	22	15	16	20	19	23	24	18	21	22	21	16	22	15	16	20	19	59.4	59.4
Q9WU62	Q9WU62	26	26	26	Inner centromere protein	Incenp	sp|Q9WU62|INCE_MOUSE Inner centromere protein OS=Mus musculus GN=Incenp PE=1 SV=2	1	26	26	26	18	17	19	19	17	16	18	14	18	19	17	14	18	17	19	19	17	16	18	14	18	19	17	14	18	17	19	19	17	16	18	14	18	19	17	14	34.4	34.4
Q9Z0W3	Q9Z0W3	26	26	26	Nuclear pore complex protein Nup160	Nup160	sp|Q9Z0W3|NU160_MOUSE Nuclear pore complex protein Nup160 OS=Mus musculus GN=Nup160 PE=1 SV=2	1	26	26	26	23	23	19	20	22	22	7	9	11	6	7	6	23	23	19	20	22	22	7	9	11	6	7	6	23	23	19	20	22	22	7	9	11	6	7	6	23	23
Q9Z1Z0	Q9Z1Z0	26	26	26	General vesicular transport factor p115	Uso1	sp|Q9Z1Z0|USO1_MOUSE General vesicular transport factor p115 OS=Mus musculus GN=Uso1 PE=1 SV=2	1	26	26	26	22	24	20	24	20	16	14	14	12	10	15	16	22	24	20	24	20	16	14	14	12	10	15	16	22	24	20	24	20	16	14	14	12	10	15	16	35.9	35.9
B2RX14	B2RX14	25	25	23	Terminal uridylyltransferase 4	Zcchc11	sp|B2RX14|TUT4_MOUSE Terminal uridylyltransferase 4 OS=Mus musculus GN=Zcchc11 PE=1 SV=2	1	25	25	23	16	19	19	15	15	18	8	7	9	6	12	8	16	19	19	15	15	18	8	7	9	6	12	8	15	18	17	14	13	16	7	7	8	6	11	8	17.8	17.8
E9Q5C9	E9Q5C9	25	25	25		Nolc1	sp|E9Q5C9|NOLC1_MOUSE Nucleolar and coiled-body phosphoprotein 1 OS=Mus musculus GN=Nolc1 PE=1 SV=1	1	25	25	25	22	22	7	21	16	15	15	15	15	12	18	16	22	22	7	21	16	15	15	15	15	12	18	16	22	22	7	21	16	15	15	15	15	12	18	16	41.9	41.9
F7BJB9	F7BJB9	25	25	25		Morc3	sp|F7BJB9|MORC3_MOUSE MORC family CW-type zinc finger protein 3 OS=Mus musculus GN=Morc3 PE=1 SV=1	1	25	25	25	20	18	18	18	18	20	11	11	5	4	7	10	20	18	18	18	18	20	11	11	5	4	7	10	20	18	18	18	18	20	11	11	5	4	7	10	35.8	35.8
O35382	O35382	25	25	25	Exocyst complex component 4	Exoc4	sp|O35382|EXOC4_MOUSE Exocyst complex component 4 OS=Mus musculus GN=Exoc4 PE=1 SV=2	1	25	25	25	20	20	19	19	17	19	8	9	8	7	11	12	20	20	19	19	17	19	8	9	8	7	11	12	20	20	19	19	17	19	8	9	8	7	11	12	30.5	30.5
P06745;CON__Q3ZBD7	P06745	25;8	25;8	25;8	Glucose-6-phosphate isomerase	Gpi	sp|P06745|G6PI_MOUSE Glucose-6-phosphate isomerase OS=Mus musculus GN=Gpi PE=1 SV=4	2	25	25	25	23	24	16	25	23	23	2	3	6	5	5	6	23	24	16	25	23	23	2	3	6	5	5	6	23	24	16	25	23	23	2	3	6	5	5	6	57.5	57.5
P10853;Q8CGP2;P70696	P10853;Q8CGP2;P70696	25;24;15	25;24;15	0;0;0	Histone H2B type 1-F/J/L;Histone H2B type 1-P;Histone H2B type 1-A	Hist1h2bf;Hist1h2bp;Hist1h2ba	sp|P10853|H2B1F_MOUSE Histone H2B type 1-F/J/L OS=Mus musculus GN=Hist1h2bf PE=1 SV=2;sp|Q8CGP2|H2B1P_MOUSE Histone H2B type 1-P OS=Mus musculus GN=Hist1h2bp PE=1 SV=3;sp|P70696|H2B1A_MOUSE Histone H2B type 1-A OS=Mus musculus GN=Hist1h2ba PE=1 SV=3	3	25	25	0	24	25	21	23	22	21	19	17	16	15	12	14	24	25	21	23	22	21	19	17	16	15	12	14	0	0	0	0	0	0	0	0	0	0	0	0	83.3	83.3
P18760;P45591	P18760	25;2	25;2	24;1	Cofilin-1	Cfl1	sp|P18760|COF1_MOUSE Cofilin-1 OS=Mus musculus GN=Cfl1 PE=1 SV=3	2	25	25	24	22	23	20	21	19	21	13	12	12	11	15	15	22	23	20	21	19	21	13	12	12	11	15	15	21	22	20	20	19	20	13	12	12	11	14	14	82.5	82.5
P46467	P46467	25	25	20	Vacuolar protein sorting-associated protein 4B	Vps4b	sp|P46467|VPS4B_MOUSE Vacuolar protein sorting-associated protein 4B OS=Mus musculus GN=Vps4b PE=1 SV=2	1	25	25	20	22	22	14	22	19	21	16	15	12	12	15	17	22	22	14	22	19	21	16	15	12	12	15	17	17	17	12	17	16	17	13	13	10	9	14	15	59.5	59.5
P52293	P52293	25	25	25	Importin subunit alpha-1	Kpna2	sp|P52293|IMA1_MOUSE Importin subunit alpha-1 OS=Mus musculus GN=Kpna2 PE=1 SV=2	1	25	25	25	22	22	21	20	20	17	18	14	10	13	13	15	22	22	21	20	20	17	18	14	10	13	13	15	22	22	21	20	20	17	18	14	10	13	13	15	70.3	70.3
P62196	P62196	25	25	25	26S protease regulatory subunit 8	Psmc5	sp|P62196|PRS8_MOUSE 26S proteasome regulatory subunit 8 OS=Mus musculus GN=Psmc5 PE=1 SV=1	1	25	25	25	25	25	22	23	25	24	17	14	12	9	14	15	25	25	22	23	25	24	17	14	12	9	14	15	25	25	22	23	25	24	17	14	12	9	14	15	63.5	63.5
Q05CL8	Q05CL8	25	25	25	La-related protein 7	Larp7	sp|Q05CL8|LARP7_MOUSE La-related protein 7 OS=Mus musculus GN=Larp7 PE=1 SV=2	1	25	25	25	22	24	19	21	22	22	15	14	13	6	15	12	22	24	19	21	22	22	15	14	13	6	15	12	22	24	19	21	22	22	15	14	13	6	15	12	46.8	46.8
Q497V5	Q497V5	25	25	25	S1 RNA-binding domain-containing protein 1	Srbd1	sp|Q497V5|SRBD1_MOUSE S1 RNA-binding domain-containing protein 1 OS=Mus musculus GN=Srbd1 PE=2 SV=2	1	25	25	25	18	22	18	20	17	12	17	14	16	14	14	14	18	22	18	20	17	12	17	14	16	14	14	14	18	22	18	20	17	12	17	14	16	14	14	14	31.2	31.2
Q571H0	Q571H0	25	25	25	Nucleolar pre-ribosomal-associated protein 1	Urb1	sp|Q571H0|NPA1P_MOUSE Nucleolar pre-ribosomal-associated protein 1 OS=Mus musculus GN=Urb1 PE=1 SV=2	1	25	25	25	19	19	18	15	17	21	13	10	12	12	14	11	19	19	18	15	17	21	13	10	12	12	14	11	19	19	18	15	17	21	13	10	12	12	14	11	15.4	15.4
Q6DFV1	Q6DFV1	25	25	25	Condensin-2 complex subunit G2	Ncapg2	sp|Q6DFV1|CNDG2_MOUSE Condensin-2 complex subunit G2 OS=Mus musculus GN=Ncapg2 PE=1 SV=2	1	25	25	25	19	18	18	17	18	22	14	13	12	12	16	17	19	18	18	17	18	22	14	13	12	12	16	17	19	18	18	17	18	22	14	13	12	12	16	17	31.5	31.5
Q6PAR5	Q6PAR5	25	25	25	GTPase-activating protein and VPS9 domain-containing protein 1	Gapvd1	sp|Q6PAR5|GAPD1_MOUSE GTPase-activating protein and VPS9 domain-containing protein 1 OS=Mus musculus GN=Gapvd1 PE=1 SV=2	1	25	25	25	21	17	18	19	19	18	6	9	6	5	11	11	21	17	18	19	19	18	6	9	6	5	11	11	21	17	18	19	19	18	6	9	6	5	11	11	19.1	19.1
Q6ZQK0	Q6ZQK0	25	25	25	Condensin-2 complex subunit D3	Ncapd3	sp|Q6ZQK0|CNDD3_MOUSE Condensin-2 complex subunit D3 OS=Mus musculus GN=Ncapd3 PE=1 SV=3	1	25	25	25	18	18	17	19	19	19	14	14	13	16	15	12	18	18	17	19	19	19	14	14	13	16	15	12	18	18	17	19	19	19	14	14	13	16	15	12	25.9	25.9
Q80WE4	Q80WE4	25	25	25	Kinesin-like protein KIF20B	Kif20b	sp|Q80WE4|KI20B_MOUSE Kinesin-like protein KIF20B OS=Mus musculus GN=Kif20b PE=1 SV=3	1	25	25	25	16	16	9	13	18	15	8	9	10	9	9	8	16	16	9	13	18	15	8	9	10	9	9	8	16	16	9	13	18	15	8	9	10	9	9	8	16.4	16.4
Q8BGD9	Q8BGD9	25	25	25	Eukaryotic translation initiation factor 4B	Eif4b	sp|Q8BGD9|IF4B_MOUSE Eukaryotic translation initiation factor 4B OS=Mus musculus GN=Eif4b PE=1 SV=1	1	25	25	25	22	24	18	23	21	21	1	4	2	4	4	6	22	24	18	23	21	21	1	4	2	4	4	6	22	24	18	23	21	21	1	4	2	4	4	6	48.3	48.3
Q8BHG1	Q8BHG1	25	25	25	Nardilysin	Nrd1	sp|Q8BHG1|NRDC_MOUSE Nardilysin OS=Mus musculus GN=Nrdc PE=1 SV=1	1	25	25	25	20	20	21	21	18	18	6	5	2	5	6	5	20	20	21	21	18	18	6	5	2	5	6	5	20	20	21	21	18	18	6	5	2	5	6	5	24.9	24.9
Q8BHK9	Q8BHK9	25	25	25	DNA excision repair protein ERCC-6-like	Ercc6l	sp|Q8BHK9|ERC6L_MOUSE DNA excision repair protein ERCC-6-like OS=Mus musculus GN=Ercc6l PE=1 SV=1	1	25	25	25	16	18	18	15	16	20	7	8	3	4	4	4	16	18	18	15	16	20	7	8	3	4	4	4	16	18	18	15	16	20	7	8	3	4	4	4	26.2	26.2
Q8R0G9	Q8R0G9	25	25	25	Nuclear pore complex protein Nup133	Nup133	sp|Q8R0G9|NU133_MOUSE Nuclear pore complex protein Nup133 OS=Mus musculus GN=Nup133 PE=1 SV=2	1	25	25	25	20	20	20	21	16	18	8	7	7	5	7	6	20	20	20	21	16	18	8	7	7	5	7	6	20	20	20	21	16	18	8	7	7	5	7	6	32.8	32.8
Q91VM5	Q91VM5	25	25	7	RNA binding motif protein, X-linked-like-1	Rbmxl1	sp|Q91VM5|RMXL1_MOUSE RNA binding motif protein, X-linked-like-1 OS=Mus musculus GN=Rbmxl1 PE=1 SV=1	1	25	25	7	21	21	11	19	19	18	13	13	13	11	13	14	21	21	11	19	19	18	13	13	13	11	13	14	5	5	3	5	5	5	3	3	4	3	4	4	54.9	54.9
Q99LF4	Q99LF4	25	25	25	tRNA-splicing ligase RtcB homolog	Rtcb	sp|Q99LF4|RTCB_MOUSE tRNA-splicing ligase RtcB homolog OS=Mus musculus GN=Rtcb PE=1 SV=1	1	25	25	25	23	23	21	21	20	21	17	16	17	14	20	21	23	23	21	21	20	21	17	16	17	14	20	21	23	23	21	21	20	21	17	16	17	14	20	21	68.7	68.7
Q99MU3	Q99MU3	25	25	25	Double-stranded RNA-specific adenosine deaminase	Adar	sp|Q99MU3|DSRAD_MOUSE Double-stranded RNA-specific adenosine deaminase OS=Mus musculus GN=Adar PE=1 SV=2	1	25	25	25	16	18	19	21	16	17	5	4	5	4	6	6	16	18	19	21	16	17	5	4	5	4	6	6	16	18	19	21	16	17	5	4	5	4	6	6	28	28
Q9CZ30	Q9CZ30	25	25	25	Obg-like ATPase 1	Ola1	sp|Q9CZ30|OLA1_MOUSE Obg-like ATPase 1 OS=Mus musculus GN=Ola1 PE=1 SV=1	1	25	25	25	17	21	20	20	19	23	17	12	12	8	13	11	17	21	20	20	19	23	17	12	12	8	13	11	17	21	20	20	19	23	17	12	12	8	13	11	75.3	75.3
Q9D8U8	Q9D8U8	25	25	24	Sorting nexin-5	Snx5	sp|Q9D8U8|SNX5_MOUSE Sorting nexin-5 OS=Mus musculus GN=Snx5 PE=1 SV=1	1	25	25	24	23	24	20	24	23	22	15	19	15	14	16	17	23	24	20	24	23	22	15	19	15	14	16	17	22	23	20	23	22	21	15	18	14	13	16	17	71.3	71.3
Q9ER72	Q9ER72	25	25	25	Cysteine--tRNA ligase, cytoplasmic	Cars	sp|Q9ER72|SYCC_MOUSE Cysteine--tRNA ligase, cytoplasmic OS=Mus musculus GN=Cars PE=1 SV=2	1	25	25	25	22	21	22	23	22	21	4	5	3	3	5	6	22	21	22	23	22	21	4	5	3	3	5	6	22	21	22	23	22	21	4	5	3	3	5	6	33	33
Q9WVK4	Q9WVK4	25	25	19	EH domain-containing protein 1	Ehd1	sp|Q9WVK4|EHD1_MOUSE EH domain-containing protein 1 OS=Mus musculus GN=Ehd1 PE=1 SV=1	1	25	25	19	21	21	21	20	20	20	10	9	12	10	11	10	21	21	21	20	20	20	10	9	12	10	11	10	16	17	17	16	15	15	8	7	9	8	8	8	57.5	57.5
Q9Z1R2	Q9Z1R2	25	25	25	Large proline-rich protein BAG6	Bag6	sp|Q9Z1R2|BAG6_MOUSE Large proline-rich protein BAG6 OS=Mus musculus GN=Bag6 PE=1 SV=1	1	25	25	25	18	20	18	20	20	20	4	5	4	4	8	8	18	20	18	20	20	20	4	5	4	4	8	8	18	20	18	20	20	20	4	5	4	4	8	8	28.7	28.7
O35685	O35685	24	24	24	Nuclear migration protein nudC	Nudc	sp|O35685|NUDC_MOUSE Nuclear migration protein nudC OS=Mus musculus GN=Nudc PE=1 SV=1	1	24	24	24	19	19	18	22	18	20	9	10	8	7	11	10	19	19	18	22	18	20	9	10	8	7	11	10	19	19	18	22	18	20	9	10	8	7	11	10	62	62
O54692	O54692	24	24	24	Centromere/kinetochore protein zw10 homolog	Zw10	sp|O54692|ZW10_MOUSE Centromere/kinetochore protein zw10 homolog OS=Mus musculus GN=Zw10 PE=1 SV=3	1	24	24	24	20	18	19	18	19	18	13	7	12	11	10	10	20	18	19	18	19	18	13	7	12	11	10	10	20	18	19	18	19	18	13	7	12	11	10	10	42.6	42.6
O70194	O70194	24	24	24	Eukaryotic translation initiation factor 3 subunit D	Eif3d	sp|O70194|EIF3D_MOUSE Eukaryotic translation initiation factor 3 subunit D OS=Mus musculus GN=Eif3d PE=1 SV=2	1	24	24	24	23	22	22	20	21	21	17	16	13	12	14	18	23	22	22	20	21	21	17	16	13	12	14	18	23	22	22	20	21	21	17	16	13	12	14	18	54.6	54.6
O88342	O88342	24	24	24	WD repeat-containing protein 1	Wdr1	sp|O88342|WDR1_MOUSE WD repeat-containing protein 1 OS=Mus musculus GN=Wdr1 PE=1 SV=3	1	24	24	24	22	20	20	21	20	21	9	12	8	9	12	9	22	20	20	21	20	21	9	12	8	9	12	9	22	20	20	21	20	21	9	12	8	9	12	9	56.3	56.3
O88532	O88532	24	24	24	Zinc finger RNA-binding protein	Zfr	sp|O88532|ZFR_MOUSE Zinc finger RNA-binding protein OS=Mus musculus GN=Zfr PE=1 SV=2	1	24	24	24	19	18	21	20	16	20	11	9	5	8	11	10	19	18	21	20	16	20	11	9	5	8	11	10	19	18	21	20	16	20	11	9	5	8	11	10	29.3	29.3
P12970	P12970	24	24	24	60S ribosomal protein L7a	Rpl7a	sp|P12970|RL7A_MOUSE 60S ribosomal protein L7a OS=Mus musculus GN=Rpl7a PE=1 SV=2	1	24	24	24	22	22	21	22	24	23	13	13	13	11	13	12	22	22	21	22	24	23	13	13	13	11	13	12	22	22	21	22	24	23	13	13	13	11	13	12	62.8	62.8
P17426	P17426	24	24	17	AP-2 complex subunit alpha-1	Ap2a1	sp|P17426|AP2A1_MOUSE AP-2 complex subunit alpha-1 OS=Mus musculus GN=Ap2a1 PE=1 SV=1	1	24	24	17	17	20	16	21	18	20	6	7	8	5	9	6	17	20	16	21	18	20	6	7	8	5	9	6	11	15	10	14	12	13	4	4	4	3	5	3	27	27
P33610	P33610	24	24	24	DNA primase large subunit	Prim2	sp|P33610|PRI2_MOUSE DNA primase large subunit OS=Mus musculus GN=Prim2 PE=1 SV=1	1	24	24	24	22	22	18	20	17	18	10	7	7	8	10	10	22	22	18	20	17	18	10	7	7	8	10	10	22	22	18	20	17	18	10	7	7	8	10	10	59.4	59.4
P35550	P35550	24	24	20	rRNA 2-O-methyltransferase fibrillarin	Fbl	sp|P35550|FBRL_MOUSE rRNA 2-O-methyltransferase fibrillarin OS=Mus musculus GN=Fbl PE=1 SV=2	1	24	24	20	18	21	17	18	17	18	17	14	17	15	15	16	18	21	17	18	17	18	17	14	17	15	15	16	14	17	13	14	13	14	15	12	14	12	12	13	67	67
P42209;Q9Z2Q6;P28661	P42209	24;1;1	24;1;1	24;1;1	Septin-1	2001-09-01	sp|P42209|SEPT1_MOUSE Septin-1 OS=Mus musculus GN=Sept1 PE=1 SV=2	3	24	24	24	21	21	22	21	20	19	11	14	10	6	14	11	21	21	22	21	20	19	11	14	10	6	14	11	21	21	22	21	20	19	11	14	10	6	14	11	71.9	71.9
P46935	P46935	24	24	21	E3 ubiquitin-protein ligase NEDD4	Nedd4	sp|P46935|NEDD4_MOUSE E3 ubiquitin-protein ligase NEDD4 OS=Mus musculus GN=Nedd4 PE=1 SV=3	1	24	24	21	18	20	20	21	18	18	12	12	8	7	9	13	18	20	20	21	18	18	12	12	8	7	9	13	16	17	17	18	16	15	10	11	7	6	7	11	32	32
P62960;Q9Z2C8	P62960	24;4	24;4	18;0	Nuclease-sensitive element-binding protein 1	Ybx1	sp|P62960|YBOX1_MOUSE Nuclease-sensitive element-binding protein 1 OS=Mus musculus GN=Ybx1 PE=1 SV=3	2	24	24	18	20	22	19	21	21	20	17	14	11	14	15	13	20	22	19	21	21	20	17	14	11	14	15	13	14	16	13	15	15	14	11	10	6	10	10	9	76.1	76.1
P63101	P63101	24	24	19	14-3-3 protein zeta/delta	Ywhaz	sp|P63101|1433Z_MOUSE 14-3-3 protein zeta/delta OS=Mus musculus GN=Ywhaz PE=1 SV=1	1	24	24	19	23	23	21	22	24	23	13	10	13	11	15	15	23	23	21	22	24	23	13	10	13	11	15	15	18	18	17	17	19	18	10	8	10	10	12	12	66.1	66.1
P80317;Q61390	P80317	24;6	24;6	24;6	T-complex protein 1 subunit zeta	Cct6a	sp|P80317|TCPZ_MOUSE T-complex protein 1 subunit zeta OS=Mus musculus GN=Cct6a PE=1 SV=3	2	24	24	24	23	23	24	22	22	21	18	17	14	12	18	13	23	23	24	22	22	21	18	17	14	12	18	13	23	23	24	22	22	21	18	17	14	12	18	13	52	52
P97452	P97452	24	24	24	Ribosome biogenesis protein BOP1	Bop1	sp|P97452|BOP1_MOUSE Ribosome biogenesis protein BOP1 OS=Mus musculus GN=Bop1 PE=1 SV=1	1	24	24	24	21	20	19	19	19	17	15	13	11	11	12	13	21	20	19	19	19	17	15	13	11	11	12	13	21	20	19	19	19	17	15	13	11	11	12	13	48.1	48.1
Q3UIA2;Q5SSM3	Q3UIA2	24;1	24;1	24;1	Rho GTPase-activating protein 17	Arhgap17	sp|Q3UIA2|RHG17_MOUSE Rho GTPase-activating protein 17 OS=Mus musculus GN=Arhgap17 PE=1 SV=1	2	24	24	24	20	22	20	22	21	21	14	12	14	11	14	15	20	22	20	22	21	21	14	12	14	11	14	15	20	22	20	22	21	21	14	12	14	11	14	15	40	40
Q5SFM8	Q5SFM8	24	24	23	RNA-binding protein 27	Rbm27	sp|Q5SFM8|RBM27_MOUSE RNA-binding protein 27 OS=Mus musculus GN=Rbm27 PE=1 SV=3	1	24	24	23	20	21	18	17	16	15	14	14	12	10	12	11	20	21	18	17	16	15	14	14	12	10	12	11	19	20	17	16	15	14	13	13	11	9	11	10	25.9	25.9
Q60520	Q60520	24	24	23	Paired amphipathic helix protein Sin3a	Sin3a	sp|Q60520|SIN3A_MOUSE Paired amphipathic helix protein Sin3a OS=Mus musculus GN=Sin3a PE=1 SV=3	1	24	24	23	18	17	14	18	18	18	11	9	9	7	8	7	18	17	14	18	18	18	11	9	9	7	8	7	17	17	14	17	18	17	11	9	9	7	8	7	23.6	23.6
Q65Z40	Q65Z40	24	24	24	Wings apart-like protein homolog	Wapal	sp|Q65Z40|WAPL_MOUSE Wings apart-like protein homolog OS=Mus musculus GN=Wapl PE=1 SV=2	1	24	24	24	20	21	17	20	18	18	9	7	6	9	11	12	20	21	17	20	18	18	9	7	6	9	11	12	20	21	17	20	18	18	9	7	6	9	11	12	28.4	28.4
Q6A009	Q6A009	24	24	24	E3 ubiquitin-protein ligase listerin	Ltn1	sp|Q6A009|LTN1_MOUSE E3 ubiquitin-protein ligase listerin OS=Mus musculus GN=Ltn1 PE=1 SV=3	1	24	24	24	19	21	18	19	18	18	5	5	8	5	10	8	19	21	18	19	18	18	5	5	8	5	10	8	19	21	18	19	18	18	5	5	8	5	10	8	18.6	18.6
Q6A0A2	Q6A0A2	24	24	24	La-related protein 4B	Larp4b	sp|Q6A0A2|LAR4B_MOUSE La-related protein 4B OS=Mus musculus GN=Larp4b PE=1 SV=2	1	24	24	24	18	21	15	19	20	21	10	9	6	9	12	10	18	21	15	19	20	21	10	9	6	9	12	10	18	21	15	19	20	21	10	9	6	9	12	10	38.3	38.3
Q6PR54	Q6PR54	24	24	24	Telomere-associated protein RIF1	Rif1	sp|Q6PR54|RIF1_MOUSE Telomere-associated protein RIF1 OS=Mus musculus GN=Rif1 PE=1 SV=2	1	24	24	24	14	19	16	18	17	14	12	10	11	8	10	11	14	19	16	18	17	14	12	10	11	8	10	11	14	19	16	18	17	14	12	10	11	8	10	11	11.2	11.2
Q6QI06	Q6QI06	24	24	24	Rapamycin-insensitive companion of mTOR	Rictor	sp|Q6QI06|RICTR_MOUSE Rapamycin-insensitive companion of mTOR OS=Mus musculus GN=Rictor PE=1 SV=2	1	24	24	24	16	17	15	17	14	14	9	8	6	8	10	10	16	17	15	17	14	14	9	8	6	8	10	10	16	17	15	17	14	14	9	8	6	8	10	10	18.5	18.5
Q80Y19	Q80Y19	24	24	24	Rho GTPase-activating protein 11A	Arhgap11a	sp|Q80Y19|RHGBA_MOUSE Rho GTPase-activating protein 11A OS=Mus musculus GN=Arhgap11a PE=1 SV=2	1	24	24	24	14	19	13	19	12	12	10	7	10	6	8	7	14	19	13	19	12	12	10	7	10	6	8	7	14	19	13	19	12	12	10	7	10	6	8	7	32.3	32.3
Q8BH59	Q8BH59	24	24	21	Calcium-binding mitochondrial carrier protein Aralar1	Slc25a12	sp|Q8BH59|CMC1_MOUSE Calcium-binding mitochondrial carrier protein Aralar1 OS=Mus musculus GN=Slc25a12 PE=1 SV=1	1	24	24	21	19	19	19	18	16	17	13	9	12	11	11	10	19	19	19	18	16	17	13	9	12	11	11	10	16	17	16	15	14	15	11	8	9	9	9	9	45.6	45.6
Q8BJW6	Q8BJW6	24	24	24	Eukaryotic translation initiation factor 2A;Eukaryotic translation initiation factor 2A, N-terminally processed	Eif2a	sp|Q8BJW6|EIF2A_MOUSE Eukaryotic translation initiation factor 2A OS=Mus musculus GN=Eif2a PE=1 SV=2	1	24	24	24	19	20	21	21	19	23	14	12	8	7	12	11	19	20	21	21	19	23	14	12	8	7	12	11	19	20	21	21	19	23	14	12	8	7	12	11	52.7	52.7
Q8CH25	Q8CH25	24	24	24	SAFB-like transcription modulator	Sltm	sp|Q8CH25|SLTM_MOUSE SAFB-like transcription modulator OS=Mus musculus GN=Sltm PE=1 SV=1	1	24	24	24	18	18	16	21	16	16	5	5	7	5	8	8	18	18	16	21	16	16	5	5	7	5	8	8	18	18	16	21	16	16	5	5	7	5	8	8	29.4	29.4
Q8R050;Q149F3	Q8R050	24;11	24;11	24;11	Eukaryotic peptide chain release factor GTP-binding subunit ERF3A	Gspt1	sp|Q8R050|ERF3A_MOUSE Eukaryotic peptide chain release factor GTP-binding subunit ERF3A OS=Mus musculus GN=Gspt1 PE=1 SV=2	2	24	24	24	22	22	20	23	21	22	13	13	8	9	11	10	22	22	20	23	21	22	13	13	8	9	11	10	22	22	20	23	21	22	13	13	8	9	11	10	45.9	45.9
Q8VH51	Q8VH51	24	24	24	RNA-binding protein 39	Rbm39	sp|Q8VH51|RBM39_MOUSE RNA-binding protein 39 OS=Mus musculus GN=Rbm39 PE=1 SV=2	1	24	24	24	23	23	20	22	23	24	17	17	16	17	18	20	23	23	20	22	23	24	17	17	16	17	18	20	23	23	20	22	23	24	17	17	16	17	18	20	56.2	56.2
Q91VN6	Q91VN6	24	24	24	Probable ATP-dependent RNA helicase DDX41	Ddx41	sp|Q91VN6|DDX41_MOUSE Probable ATP-dependent RNA helicase DDX41 OS=Mus musculus GN=Ddx41 PE=1 SV=2	1	24	24	24	21	22	20	21	20	21	14	15	7	5	10	12	21	22	20	21	20	21	14	15	7	5	10	12	21	22	20	21	20	21	14	15	7	5	10	12	43.7	43.7
Q922S8	Q922S8	24	24	22	Kinesin-like protein KIF2C	Kif2c	sp|Q922S8|KIF2C_MOUSE Kinesin-like protein KIF2C OS=Mus musculus GN=Kif2c PE=1 SV=1	1	24	24	22	21	20	17	20	19	21	11	10	11	5	10	14	21	20	17	20	19	21	11	10	11	5	10	14	19	18	15	18	18	20	10	9	10	4	9	13	39.5	39.5
Q9CPN8;O88477;Q5SF07	Q9CPN8	24;1;1	24;1;1	24;1;1	Insulin-like growth factor 2 mRNA-binding protein 3	Igf2bp3	sp|Q9CPN8|IF2B3_MOUSE Insulin-like growth factor 2 mRNA-binding protein 3 OS=Mus musculus GN=Igf2bp3 PE=1 SV=1	3	24	24	24	16	19	19	19	19	17	16	20	15	17	17	17	16	19	19	19	19	17	16	20	15	17	17	17	16	19	19	19	19	17	16	20	15	17	17	17	48	48
Q9CR16	Q9CR16	24	24	24	Peptidyl-prolyl cis-trans isomerase D	Ppid	sp|Q9CR16|PPID_MOUSE Peptidyl-prolyl cis-trans isomerase D OS=Mus musculus GN=Ppid PE=1 SV=3	1	24	24	24	20	20	20	19	21	19	9	12	12	12	16	15	20	20	20	19	21	19	9	12	12	12	16	15	20	20	20	19	21	19	9	12	12	12	16	15	72.7	72.7
Q9CSH3	Q9CSH3	24	24	24	Exosome complex exonuclease RRP44	Dis3	sp|Q9CSH3|RRP44_MOUSE Exosome complex exonuclease RRP44 OS=Mus musculus GN=Dis3 PE=1 SV=4	1	24	24	24	21	21	19	17	21	19	11	8	4	6	11	11	21	21	19	17	21	19	11	8	4	6	11	11	21	21	19	17	21	19	11	8	4	6	11	11	37.6	37.6
Q9DAW6	Q9DAW6	24	24	24	U4/U6 small nuclear ribonucleoprotein Prp4	Prpf4	sp|Q9DAW6|PRP4_MOUSE U4/U6 small nuclear ribonucleoprotein Prp4 OS=Mus musculus GN=Prpf4 PE=1 SV=1	1	24	24	24	19	20	18	19	19	19	11	9	11	11	13	12	19	20	18	19	19	19	11	9	11	11	13	12	19	20	18	19	19	19	11	9	11	11	13	12	59.5	59.5
Q9DCD0	Q9DCD0	24	24	24	6-phosphogluconate dehydrogenase, decarboxylating	Pgd	sp|Q9DCD0|6PGD_MOUSE 6-phosphogluconate dehydrogenase, decarboxylating OS=Mus musculus GN=Pgd PE=1 SV=3	1	24	24	24	22	21	21	19	20	20	9	8	6	9	11	13	22	21	21	19	20	20	9	8	6	9	11	13	22	21	21	19	20	20	9	8	6	9	11	13	59	59
Q9ERA6	Q9ERA6	24	24	24	Tuftelin-interacting protein 11	Tfip11	sp|Q9ERA6|TFP11_MOUSE Tuftelin-interacting protein 11 OS=Mus musculus GN=Tfip11 PE=1 SV=1	1	24	24	24	20	22	18	20	21	21	13	13	11	14	11	12	20	22	18	20	21	21	13	13	11	14	11	12	20	22	18	20	21	21	13	13	11	14	11	12	36.2	36.2
Q9QUG9	Q9QUG9	24	24	24	RAS guanyl-releasing protein 2	Rasgrp2	sp|Q9QUG9|GRP2_MOUSE RAS guanyl-releasing protein 2 OS=Mus musculus GN=Rasgrp2 PE=1 SV=2	1	24	24	24	19	18	20	23	17	14	7	10	9	8	9	12	19	18	20	23	17	14	7	10	9	8	9	12	19	18	20	23	17	14	7	10	9	8	9	12	48.8	48.8
Q9WTX8	Q9WTX8	24	24	24	Mitotic spindle assembly checkpoint protein MAD1	Mad1l1	sp|Q9WTX8|MD1L1_MOUSE Mitotic spindle assembly checkpoint protein MAD1 OS=Mus musculus GN=Mad1l1 PE=1 SV=1	1	24	24	24	20	22	19	18	19	18	8	5	3	3	6	6	20	22	19	18	19	18	8	5	3	3	6	6	20	22	19	18	19	18	8	5	3	3	6	6	37.4	37.4
Q9Z204;Q8BTF8	Q9Z204	24;1	24;1	24;1	Heterogeneous nuclear ribonucleoproteins C1/C2	Hnrnpc	sp|Q9Z204|HNRPC_MOUSE Heterogeneous nuclear ribonucleoproteins C1/C2 OS=Mus musculus GN=Hnrnpc PE=1 SV=1	2	24	24	24	21	21	18	19	21	19	13	18	16	13	19	19	21	21	18	19	21	19	13	18	16	13	19	19	21	21	18	19	21	19	13	18	16	13	19	19	74.4	74.4
Q9Z329	Q9Z329	28	24	24	Inositol 1,4,5-trisphosphate receptor type 2	Itpr2	sp|Q9Z329|ITPR2_MOUSE Inositol 1,4,5-trisphosphate receptor type 2 OS=Mus musculus GN=Itpr2 PE=1 SV=4	1	28	24	24	19	19	18	16	19	16	6	3	4	1	3	2	16	16	14	14	17	13	4	2	3	0	2	0	16	16	14	14	17	13	4	2	3	0	2	0	13.5	12.3
B2RRE7	B2RRE7	23	23	23	OTU domain-containing protein 4	Otud4	sp|B2RRE7|OTUD4_MOUSE OTU domain-containing protein 4 OS=Mus musculus GN=Otud4 PE=1 SV=1	1	23	23	23	17	20	16	18	19	21	8	7	4	6	7	11	17	20	16	18	19	21	8	7	4	6	7	11	17	20	16	18	19	21	8	7	4	6	7	11	26.8	26.8
O54824	O54824	23	23	23	Pro-interleukin-16;Interleukin-16	Il16	sp|O54824|IL16_MOUSE Pro-interleukin-16 OS=Mus musculus GN=Il16 PE=1 SV=3	1	23	23	23	22	22	18	20	22	21	11	8	6	4	7	5	22	22	18	20	22	21	11	8	6	4	7	5	22	22	18	20	22	21	11	8	6	4	7	5	21.2	21.2
O89110	O89110	23	23	23	Caspase-8;Caspase-8 subunit p18;Caspase-8 subunit p10	Casp8	sp|O89110|CASP8_MOUSE Caspase-8 OS=Mus musculus GN=Casp8 PE=1 SV=1	1	23	23	23	21	20	16	19	20	22	10	8	9	6	13	12	21	20	16	19	20	22	10	8	9	6	13	12	21	20	16	19	20	22	10	8	9	6	13	12	64.4	64.4
P06151;P00342	P06151	23;2	23;2	22;1	L-lactate dehydrogenase A chain	Ldha	sp|P06151|LDHA_MOUSE L-lactate dehydrogenase A chain OS=Mus musculus GN=Ldha PE=1 SV=3	2	23	23	22	22	20	18	20	20	18	6	6	4	6	6	5	22	20	18	20	20	18	6	6	4	6	6	5	21	19	17	19	19	17	6	6	4	6	6	5	70.2	70.2
P10852	P10852	23	23	23	4F2 cell-surface antigen heavy chain	Slc3a2	sp|P10852|4F2_MOUSE 4F2 cell-surface antigen heavy chain OS=Mus musculus GN=Slc3a2 PE=1 SV=1	1	23	23	23	22	23	19	22	21	22	11	11	9	9	13	8	22	23	19	22	21	22	11	11	9	9	13	8	22	23	19	22	21	22	11	11	9	9	13	8	50.6	50.6
P13439	P13439	23	23	23	Uridine 5-monophosphate synthase;Orotate phosphoribosyltransferase;Orotidine 5-phosphate decarboxylase	Umps	sp|P13439|UMPS_MOUSE Uridine 5-monophosphate synthase OS=Mus musculus GN=Umps PE=1 SV=3	1	23	23	23	22	22	18	21	19	21	15	14	12	13	13	15	22	22	18	21	19	21	15	14	12	13	13	15	22	22	18	21	19	21	15	14	12	13	13	15	62	62
P18653;Q9WUT3	P18653	23;7	23;7	15;1	Ribosomal protein S6 kinase alpha-1	Rps6ka1	sp|P18653|KS6A1_MOUSE Ribosomal protein S6 kinase alpha-1 OS=Mus musculus GN=Rps6ka1 PE=1 SV=1	2	23	23	15	16	19	18	21	18	16	9	11	9	9	13	12	16	19	18	21	18	16	9	11	9	9	13	12	9	12	12	13	11	10	7	7	5	5	9	9	40.2	40.2
P26443	P26443	23	23	23	Glutamate dehydrogenase 1, mitochondrial	Glud1	sp|P26443|DHE3_MOUSE Glutamate dehydrogenase 1, mitochondrial OS=Mus musculus GN=Glud1 PE=1 SV=1	1	23	23	23	21	22	21	23	20	21	9	11	10	8	6	6	21	22	21	23	20	21	9	11	10	8	6	6	21	22	21	23	20	21	9	11	10	8	6	6	56.6	56.6
P27546	P27546	23	23	23	Microtubule-associated protein 4	Map4	sp|P27546|MAP4_MOUSE Microtubule-associated protein 4 OS=Mus musculus GN=Map4 PE=1 SV=3	1	23	23	23	16	19	16	17	12	12	11	9	7	3	5	7	16	19	16	17	12	12	11	9	7	3	5	7	16	19	16	17	12	12	11	9	7	3	5	7	27.8	27.8
P46062	P46062	23	23	23	Signal-induced proliferation-associated protein 1	Sipa1	sp|P46062|SIPA1_MOUSE Signal-induced proliferation-associated protein 1 OS=Mus musculus GN=Sipa1 PE=1 SV=2	1	23	23	23	20	20	15	19	19	20	7	4	5	3	8	8	20	20	15	19	19	20	7	4	5	3	8	8	20	20	15	19	19	20	7	4	5	3	8	8	27.9	27.9
P47911	P47911	23	23	23	60S ribosomal protein L6	Rpl6	sp|P47911|RL6_MOUSE 60S ribosomal protein L6 OS=Mus musculus GN=Rpl6 PE=1 SV=3	1	23	23	23	20	19	19	21	21	21	15	15	15	11	16	14	20	19	19	21	21	21	15	15	15	11	16	14	20	19	19	21	21	21	15	15	15	11	16	14	53	53
P49312	P49312	27	23	23	Heterogeneous nuclear ribonucleoprotein A1;Heterogeneous nuclear ribonucleoprotein A1, N-terminally processed	Hnrnpa1	sp|P49312|ROA1_MOUSE Heterogeneous nuclear ribonucleoprotein A1 OS=Mus musculus GN=Hnrnpa1 PE=1 SV=2	1	27	23	23	25	25	23	24	27	25	14	13	12	10	13	13	22	22	21	21	23	22	12	11	10	9	12	13	22	22	21	21	23	22	12	11	10	9	12	13	57.5	57.5
P50516	P50516	23	23	23	V-type proton ATPase catalytic subunit A	Atp6v1a	sp|P50516|VATA_MOUSE V-type proton ATPase catalytic subunit A OS=Mus musculus GN=Atp6v1a PE=1 SV=2	1	23	23	23	17	21	20	19	17	17	6	5	7	4	5	3	17	21	20	19	17	17	6	5	7	4	5	3	17	21	20	19	17	17	6	5	7	4	5	3	44.2	44.2
P57776	P57776	23	23	20	Elongation factor 1-delta	Eef1d	sp|P57776|EF1D_MOUSE Elongation factor 1-delta OS=Mus musculus GN=Eef1d PE=1 SV=3	1	23	23	20	20	23	18	21	20	21	14	15	7	9	14	14	20	23	18	21	20	21	14	15	7	9	14	14	17	20	15	18	17	18	11	12	7	8	13	12	71.5	71.5
P58462;Q99JB6;P58463	P58462	23;1;1	23;1;1	21;0;0	Forkhead box protein P1	Foxp1	sp|P58462|FOXP1_MOUSE Forkhead box protein P1 OS=Mus musculus GN=Foxp1 PE=1 SV=1	3	23	23	21	21	21	22	21	22	22	16	11	12	10	15	16	21	21	22	21	22	22	16	11	12	10	15	16	19	19	20	19	20	20	14	10	12	9	15	15	53.3	53.3
P59325	P59325	23	23	23	Eukaryotic translation initiation factor 5	Eif5	sp|P59325|IF5_MOUSE Eukaryotic translation initiation factor 5 OS=Mus musculus GN=Eif5 PE=1 SV=1	1	23	23	23	21	21	18	22	23	22	11	13	6	8	10	11	21	21	18	22	23	22	11	13	6	8	10	11	21	21	18	22	23	22	11	13	6	8	10	11	45.2	45.2
P63037	P63037	23	23	23	DnaJ homolog subfamily A member 1	Dnaja1	sp|P63037|DNJA1_MOUSE DnaJ homolog subfamily A member 1 OS=Mus musculus GN=Dnaja1 PE=1 SV=1	1	23	23	23	21	19	17	20	23	19	16	12	11	9	13	15	21	19	17	20	23	19	16	12	11	9	13	15	21	19	17	20	23	19	16	12	11	9	13	15	64	64
P70336	P70336	26	23	23	Rho-associated protein kinase 2	Rock2	sp|P70336|ROCK2_MOUSE Rho-associated protein kinase 2 OS=Mus musculus GN=Rock2 PE=1 SV=1	1	26	23	23	18	18	15	16	15	14	3	1	4	2	9	7	17	17	14	15	14	12	3	1	4	2	8	6	17	17	14	15	14	12	3	1	4	2	8	6	22.8	20.2
P97351	P97351	23	23	23	40S ribosomal protein S3a	Rps3a	sp|P97351|RS3A_MOUSE 40S ribosomal protein S3a OS=Mus musculus GN=Rps3a PE=1 SV=3	1	23	23	23	22	23	21	21	21	22	17	17	16	14	13	17	22	23	21	21	21	22	17	17	16	14	13	17	22	23	21	21	21	22	17	17	16	14	13	17	63.3	63.3
Q00547	Q00547	23	23	23	Hyaluronan mediated motility receptor	Hmmr	sp|Q00547|HMMR_MOUSE Hyaluronan mediated motility receptor OS=Mus musculus GN=Hmmr PE=1 SV=4	1	23	23	23	16	16	15	16	14	16	17	16	16	15	13	13	16	16	15	16	14	16	17	16	16	15	13	13	16	16	15	16	14	16	17	16	16	15	13	13	42.8	42.8
Q00612;P97324;REV__P46662	Q00612	23;4;1	23;4;1	23;4;1	Glucose-6-phosphate 1-dehydrogenase X	G6pdx	sp|Q00612|G6PD1_MOUSE Glucose-6-phosphate 1-dehydrogenase X OS=Mus musculus GN=G6pdx PE=1 SV=3	3	23	23	23	23	21	19	22	22	20	9	9	6	7	10	10	23	21	19	22	22	20	9	9	6	7	10	10	23	21	19	22	22	20	9	9	6	7	10	10	53.8	53.8
Q04692	Q04692	23	23	23	SWI/SNF-related matrix-associated actin-dependent regulator of chromatin subfamily A containing DEAD/H box 1	Smarcad1	sp|Q04692|SMRCD_MOUSE SWI/SNF-related matrix-associated actin-dependent regulator of chromatin subfamily A containing DEAD/H box 1 OS=Mus musculus GN=Smarcad1 PE=1 SV=2	1	23	23	23	18	17	16	15	20	19	8	9	9	8	13	9	18	17	16	15	20	19	8	9	9	8	13	9	18	17	16	15	20	19	8	9	9	8	13	9	27.8	27.8
Q08288	Q08288	23	23	23	Cell growth-regulating nucleolar protein	Lyar	sp|Q08288|LYAR_MOUSE Cell growth-regulating nucleolar protein OS=Mus musculus GN=Lyar PE=1 SV=2	1	23	23	23	21	21	15	17	17	18	13	14	16	15	16	17	21	21	15	17	17	18	13	14	16	15	16	17	21	21	15	17	17	18	13	14	16	15	16	17	58.8	58.8
Q14AX6	Q14AX6	23	23	18	Cyclin-dependent kinase 12	Cdk12	sp|Q14AX6|CDK12_MOUSE Cyclin-dependent kinase 12 OS=Mus musculus GN=Cdk12 PE=1 SV=2	1	23	23	18	17	17	14	15	17	14	10	10	4	7	11	11	17	17	14	15	17	14	10	10	4	7	11	11	13	13	10	12	14	12	8	9	3	4	9	9	21	21
Q3UQ44	Q3UQ44	27	23	23	Ras GTPase-activating-like protein IQGAP2	Iqgap2	sp|Q3UQ44|IQGA2_MOUSE Ras GTPase-activating-like protein IQGAP2 OS=Mus musculus GN=Iqgap2 PE=1 SV=2	1	27	23	23	15	13	13	12	22	22	9	6	3	4	18	18	11	9	10	8	18	19	5	3	1	1	14	14	11	9	10	8	18	19	5	3	1	1	14	14	22.9	20.8
Q61024	Q61024	23	23	23	Asparagine synthetase [glutamine-hydrolyzing]	Asns	sp|Q61024|ASNS_MOUSE Asparagine synthetase [glutamine-hydrolyzing] OS=Mus musculus GN=Asns PE=1 SV=3	1	23	23	23	22	22	21	21	22	22	13	14	7	11	12	15	22	22	21	21	22	22	13	14	7	11	12	15	22	22	21	21	22	22	13	14	7	11	12	15	53.3	53.3
Q61164	Q61164	23	23	23	Transcriptional repressor CTCF	Ctcf	sp|Q61164|CTCF_MOUSE Transcriptional repressor CTCF OS=Mus musculus GN=Ctcf PE=1 SV=2	1	23	23	23	20	17	13	20	17	18	12	12	12	13	14	9	20	17	13	20	17	18	12	12	12	13	14	9	20	17	13	20	17	18	12	12	12	13	14	9	33.3	33.3
Q61464	Q61464	23	23	23	Zinc finger protein 638	Znf638	sp|Q61464|ZN638_MOUSE Zinc finger protein 638 OS=Mus musculus GN=Znf638 PE=1 SV=2	1	23	23	23	14	18	13	15	15	14	8	8	7	6	7	11	14	18	13	15	15	14	8	8	7	6	7	11	14	18	13	15	15	14	8	8	7	6	7	11	15.6	15.6
Q6A028	Q6A028	23	23	23	Switch-associated protein 70	Swap70	sp|Q6A028|SWP70_MOUSE Switch-associated protein 70 OS=Mus musculus GN=Swap70 PE=1 SV=2	1	23	23	23	18	21	17	19	18	17	7	8	5	5	6	8	18	21	17	19	18	17	7	8	5	5	6	8	18	21	17	19	18	17	7	8	5	5	6	8	44.1	44.1
Q6PDG5	Q6PDG5	34	23	23	SWI/SNF complex subunit SMARCC2	Smarcc2	sp|Q6PDG5|SMRC2_MOUSE SWI/SNF complex subunit SMARCC2 OS=Mus musculus GN=Smarcc2 PE=1 SV=2	1	34	23	23	29	31	24	26	28	28	20	18	17	17	17	15	20	22	16	17	20	18	14	13	11	11	11	9	20	22	16	17	20	18	14	13	11	11	11	9	32.6	24.9
Q8BI84	Q8BI84	23	23	23	Melanoma inhibitory activity protein 3	Mia3	sp|Q8BI84|TGO1_MOUSE Transport and Golgi organization protein 1 homolog OS=Mus musculus GN=Mia3 PE=1 SV=2	1	23	23	23	18	18	17	19	13	13	6	3	1	2	3	2	18	18	17	19	13	13	6	3	1	2	3	2	18	18	17	19	13	13	6	3	1	2	3	2	15.9	15.9
Q8C2Q3	Q8C2Q3	23	23	23	RNA-binding protein 14	Rbm14	sp|Q8C2Q3|RBM14_MOUSE RNA-binding protein 14 OS=Mus musculus GN=Rbm14 PE=1 SV=1	1	23	23	23	22	20	20	21	20	22	18	18	18	13	17	20	22	20	20	21	20	22	18	18	18	13	17	20	22	20	20	21	20	22	18	18	18	13	17	20	39.6	39.6
Q8C4J7	Q8C4J7	23	23	23	Transducin beta-like protein 3	Tbl3	sp|Q8C4J7|TBL3_MOUSE Transducin beta-like protein 3 OS=Mus musculus GN=Tbl3 PE=2 SV=1	1	23	23	23	22	20	19	21	18	20	17	14	14	12	15	11	22	20	19	21	18	20	17	14	14	12	15	11	22	20	19	21	18	20	17	14	14	12	15	11	45.2	45.2
Q8JZK9;P54869	Q8JZK9	23;1	23;1	23;1	Hydroxymethylglutaryl-CoA synthase, cytoplasmic	Hmgcs1	sp|Q8JZK9|HMCS1_MOUSE Hydroxymethylglutaryl-CoA synthase, cytoplasmic OS=Mus musculus GN=Hmgcs1 PE=1 SV=1	2	23	23	23	20	21	21	21	22	20	13	12	10	9	13	12	20	21	21	21	22	20	13	12	10	9	13	12	20	21	21	21	22	20	13	12	10	9	13	12	54	54
Q8K296	Q8K296	23	23	21	Myotubularin-related protein 3	Mtmr3	sp|Q8K296|MTMR3_MOUSE Myotubularin-related protein 3 OS=Mus musculus GN=Mtmr3 PE=1 SV=2	1	23	23	21	14	19	17	18	14	15	8	5	2	4	7	7	14	19	17	18	14	15	8	5	2	4	7	7	12	17	15	16	12	13	6	3	1	3	6	6	24.9	24.9
Q8K4B0	Q8K4B0	27	23	20	Metastasis-associated protein MTA1	Mta1	sp|Q8K4B0|MTA1_MOUSE Metastasis-associated protein MTA1 OS=Mus musculus GN=Mta1 PE=1 SV=1	1	27	23	20	18	19	20	19	18	21	12	13	10	13	14	15	16	17	17	17	16	19	10	11	8	11	12	12	14	15	15	16	13	16	9	10	6	10	9	10	45.7	40.1
Q8VDW0	Q8VDW0	23	23	13	ATP-dependent RNA helicase DDX39A	Ddx39a	sp|Q8VDW0|DX39A_MOUSE ATP-dependent RNA helicase DDX39A OS=Mus musculus GN=Ddx39a PE=1 SV=1	1	23	23	13	21	22	21	22	20	20	16	17	13	12	16	16	21	22	21	22	20	20	16	17	13	12	16	16	12	12	11	12	10	10	9	8	7	6	8	8	62.3	62.3
Q91VI7	Q91VI7	23	23	23	Ribonuclease inhibitor	Rnh1	sp|Q91VI7|RINI_MOUSE Ribonuclease inhibitor OS=Mus musculus GN=Rnh1 PE=1 SV=1	1	23	23	23	22	21	22	21	22	22	12	12	10	6	15	13	22	21	22	21	22	22	12	12	10	6	15	13	22	21	22	21	22	22	12	12	10	6	15	13	74.6	74.6
Q99JX7	Q99JX7	23	23	23	Nuclear RNA export factor 1	Nxf1	sp|Q99JX7|NXF1_MOUSE Nuclear RNA export factor 1 OS=Mus musculus GN=Nxf1 PE=1 SV=3	1	23	23	23	23	22	17	20	21	21	13	9	8	8	15	16	23	22	17	20	21	21	13	9	8	8	15	16	23	22	17	20	21	21	13	9	8	8	15	16	48.1	48.1
Q99JY9;Q641P0	Q99JY9	23;4	23;4	23;4	Actin-related protein 3	Actr3	sp|Q99JY9|ARP3_MOUSE Actin-related protein 3 OS=Mus musculus GN=Actr3 PE=1 SV=3	2	23	23	23	20	21	21	22	21	22	12	13	11	11	16	14	20	21	21	22	21	22	12	13	11	11	16	14	20	21	21	22	21	22	12	13	11	11	16	14	62.7	62.7
Q99KK7	Q99KK7	23	23	23	Dipeptidyl peptidase 3	Dpp3	sp|Q99KK7|DPP3_MOUSE Dipeptidyl peptidase 3 OS=Mus musculus GN=Dpp3 PE=1 SV=2	1	23	23	23	18	18	19	20	18	20	2	2	3	2	8	6	18	18	19	20	18	20	2	2	3	2	8	6	18	18	19	20	18	20	2	2	3	2	8	6	46.2	46.2
Q9CW46	Q9CW46	23	23	23	Ribonucleoprotein PTB-binding 1	Raver1	sp|Q9CW46|RAVR1_MOUSE Ribonucleoprotein PTB-binding 1 OS=Mus musculus GN=Raver1 PE=1 SV=2	1	23	23	23	21	22	20	17	20	19	14	12	8	7	11	12	21	22	20	17	20	19	14	12	8	7	11	12	21	22	20	17	20	19	14	12	8	7	11	12	49.1	49.1
Q9CXF4	Q9CXF4	23	23	23	TBC1 domain family member 15	Tbc1d15	sp|Q9CXF4|TBC15_MOUSE TBC1 domain family member 15 OS=Mus musculus GN=Tbc1d15 PE=1 SV=1	1	23	23	23	19	21	22	20	16	16	12	15	10	9	16	13	19	21	22	20	16	16	12	15	10	9	16	13	19	21	22	20	16	16	12	15	10	9	16	13	42.3	42.3
Q9EPL8	Q9EPL8	23	23	22	Importin-7	Ipo7	sp|Q9EPL8|IPO7_MOUSE Importin-7 OS=Mus musculus GN=Ipo7 PE=1 SV=2	1	23	23	22	20	18	19	20	22	21	9	9	10	10	10	9	20	18	19	20	22	21	9	9	10	10	10	9	19	17	18	19	21	20	9	9	9	9	9	8	32.7	32.7
Q9R1T2	Q9R1T2	23	23	23	SUMO-activating enzyme subunit 1;SUMO-activating enzyme subunit 1, N-terminally processed	Sae1	sp|Q9R1T2|SAE1_MOUSE SUMO-activating enzyme subunit 1 OS=Mus musculus GN=Sae1 PE=1 SV=1	1	23	23	23	22	21	14	21	21	20	10	13	6	9	15	18	22	21	14	21	21	20	10	13	6	9	15	18	22	21	14	21	21	20	10	13	6	9	15	18	76.9	76.9
Q9R1X4	Q9R1X4	23	23	23	Protein timeless homolog	Timeless	sp|Q9R1X4|TIM_MOUSE Protein timeless homolog OS=Mus musculus GN=Timeless PE=1 SV=3	1	23	23	23	17	20	19	19	17	19	10	10	7	8	12	11	17	20	19	19	17	19	10	10	7	8	12	11	17	20	19	19	17	19	10	10	7	8	12	11	23.5	23.5
Q9Z148	Q9Z148	24	23	23	Histone-lysine N-methyltransferase EHMT2	Ehmt2	sp|Q9Z148|EHMT2_MOUSE Histone-lysine N-methyltransferase EHMT2 OS=Mus musculus GN=Ehmt2 PE=1 SV=2	1	24	23	23	13	11	15	14	15	18	18	15	15	11	13	8	12	10	14	13	14	18	18	15	14	11	12	8	12	10	14	13	14	18	18	15	14	11	12	8	26.7	25.9
Q9Z2I0	Q9Z2I0	23	23	23	LETM1 and EF-hand domain-containing protein 1, mitochondrial	Letm1	sp|Q9Z2I0|LETM1_MOUSE Mitochondrial proton/calcium exchanger protein OS=Mus musculus GN=Letm1 PE=1 SV=1	1	23	23	23	18	16	17	18	17	17	5	9	5	4	7	6	18	16	17	18	17	17	5	9	5	4	7	6	18	16	17	18	17	17	5	9	5	4	7	6	42	42
Q9Z2X1	Q9Z2X1	23	23	20	Heterogeneous nuclear ribonucleoprotein F;Heterogeneous nuclear ribonucleoprotein F, N-terminally processed	Hnrnpf	sp|Q9Z2X1|HNRPF_MOUSE Heterogeneous nuclear ribonucleoprotein F OS=Mus musculus GN=Hnrnpf PE=1 SV=3	1	23	23	20	21	20	21	20	22	20	14	16	15	15	15	17	21	20	21	20	22	20	14	16	15	15	15	17	18	17	18	17	19	17	11	13	13	12	12	14	69.4	69.4
A2A4P0	A2A4P0	23	22	22	ATP-dependent RNA helicase DHX8	Dhx8	sp|A2A4P0|DHX8_MOUSE ATP-dependent RNA helicase DHX8 OS=Mus musculus GN=Dhx8 PE=2 SV=1	1	23	22	22	16	19	20	17	16	15	8	9	7	6	8	9	15	18	19	17	15	14	8	9	7	6	8	9	15	18	19	17	15	14	8	9	7	6	8	9	24.1	23.4
G3X9K3	G3X9K3	22	22	16	Brefeldin A-inhibited guanine nucleotide-exchange protein 1	Arfgef1	sp|G3X9K3|BIG1_MOUSE Brefeldin A-inhibited guanine nucleotide-exchange protein 1 OS=Mus musculus GN=Arfgef1 PE=1 SV=1	1	22	22	16	18	14	15	14	14	14	6	8	7	6	8	9	18	14	15	14	14	14	6	8	7	6	8	9	14	12	12	10	11	11	4	6	4	3	4	4	15.1	15.1
O08529	O08529	22	22	22	Calpain-2 catalytic subunit	Capn2	sp|O08529|CAN2_MOUSE Calpain-2 catalytic subunit OS=Mus musculus GN=Capn2 PE=1 SV=4	1	22	22	22	16	17	13	13	19	15	3	5	4	4	10	11	16	17	13	13	19	15	3	5	4	4	10	11	16	17	13	13	19	15	3	5	4	4	10	11	46.1	46.1
O08900	O08900	22	22	20	Zinc finger protein Aiolos	Ikzf3	sp|O08900|IKZF3_MOUSE Zinc finger protein Aiolos OS=Mus musculus GN=Ikzf3 PE=1 SV=2	1	22	22	20	16	17	15	15	18	17	10	7	6	7	6	7	16	17	15	15	18	17	10	7	6	7	6	7	15	15	13	14	17	15	9	6	5	6	5	6	49.7	49.7
O55098	O55098	22	22	20	Serine/threonine-protein kinase 10	Stk10	sp|O55098|STK10_MOUSE Serine/threonine-protein kinase 10 OS=Mus musculus GN=Stk10 PE=1 SV=2	1	22	22	20	19	17	13	15	16	19	14	14	11	10	15	14	19	17	13	15	16	19	14	14	11	10	15	14	17	15	11	13	14	17	12	12	9	8	13	12	22	22
O70551	O70551	22	22	20	SRSF protein kinase 1	Srpk1	sp|O70551|SRPK1_MOUSE SRSF protein kinase 1 OS=Mus musculus GN=Srpk1 PE=1 SV=2	1	22	22	20	18	19	17	16	18	17	11	11	6	9	14	12	18	19	17	16	18	17	11	11	6	9	14	12	16	17	15	14	16	15	10	11	5	8	12	10	41	41
P12382	P12382	24	22	20	ATP-dependent 6-phosphofructokinase, liver type	Pfkl	sp|P12382|PFKAL_MOUSE ATP-dependent 6-phosphofructokinase, liver type OS=Mus musculus GN=Pfkl PE=1 SV=4	1	24	22	20	22	22	19	23	20	23	13	12	7	8	14	13	20	20	17	21	18	21	11	11	6	7	13	12	18	18	15	19	16	19	10	11	6	6	12	11	38.1	34.5
P15864	P15864	22	22	8	Histone H1.2	Hist1h1c	sp|P15864|H12_MOUSE Histone H1.2 OS=Mus musculus GN=Hist1h1c PE=1 SV=2	1	22	22	8	19	18	14	19	14	16	12	15	15	15	14	14	19	18	14	19	14	16	12	15	15	15	14	14	7	7	3	6	4	5	2	4	4	4	4	4	50.9	50.9
P21107	P21107	24	22	14	Tropomyosin alpha-3 chain	Tpm3	sp|P21107|TPM3_MOUSE Tropomyosin alpha-3 chain OS=Mus musculus GN=Tpm3 PE=1 SV=3	1	24	22	14	23	20	19	20	18	19	14	10	8	10	12	12	21	18	17	18	16	17	12	9	7	9	11	10	13	11	12	11	10	12	9	7	4	6	7	6	51.2	51.2
P28658	P28658	22	22	22	Ataxin-10	Atxn10	sp|P28658|ATX10_MOUSE Ataxin-10 OS=Mus musculus GN=Atxn10 PE=1 SV=2	1	22	22	22	17	17	18	18	18	21	12	9	8	10	13	13	17	17	18	18	18	21	12	9	8	10	13	13	17	17	18	18	18	21	12	9	8	10	13	13	50.3	50.3
P28843	P28843	22	22	22	Dipeptidyl peptidase 4;Dipeptidyl peptidase 4 membrane form;Dipeptidyl peptidase 4 soluble form	Dpp4	sp|P28843|DPP4_MOUSE Dipeptidyl peptidase 4 OS=Mus musculus GN=Dpp4 PE=1 SV=3	1	22	22	22	17	19	18	17	17	16	8	5	7	4	8	7	17	19	18	17	17	16	8	5	7	4	8	7	17	19	18	17	17	16	8	5	7	4	8	7	34.2	34.2
P35922	P35922	24	22	21	Fragile X mental retardation protein 1 homolog	Fmr1	sp|P35922|FMR1_MOUSE Synaptic functional regulator FMR1 OS=Mus musculus GN=Fmr1 PE=1 SV=1	1	24	22	21	20	23	19	21	20	20	13	12	10	13	15	12	18	21	18	19	18	18	11	10	9	12	13	10	17	20	17	18	17	17	10	10	9	12	12	10	50.7	48
P40124;Q9CYT6	P40124	22;1	22;1	22;1	Adenylyl cyclase-associated protein 1	Cap1	sp|P40124|CAP1_MOUSE Adenylyl cyclase-associated protein 1 OS=Mus musculus GN=Cap1 PE=1 SV=4	2	22	22	22	20	21	15	20	19	19	5	4	5	5	7	9	20	21	15	20	19	19	5	4	5	5	7	9	20	21	15	20	19	19	5	4	5	5	7	9	50	50
P51881	P51881	22	22	12	ADP/ATP translocase 2;ADP/ATP translocase 2, N-terminally processed	Slc25a5	sp|P51881|ADT2_MOUSE ADP/ATP translocase 2 OS=Mus musculus GN=Slc25a5 PE=1 SV=3	1	22	22	12	21	20	19	20	18	18	16	16	16	15	17	16	21	20	19	20	18	18	16	16	16	15	17	16	11	11	10	11	10	10	10	10	11	9	10	9	63.1	63.1
P53569	P53569	22	22	22	CCAAT/enhancer-binding protein zeta	Cebpz	sp|P53569|CEBPZ_MOUSE CCAAT/enhancer-binding protein zeta OS=Mus musculus GN=Cebpz PE=1 SV=2	1	22	22	22	20	19	18	17	18	17	15	13	12	13	12	11	20	19	18	17	18	17	15	13	12	13	12	11	20	19	18	17	18	17	15	13	12	13	12	11	25.2	25.2
P54071	P54071	22	22	21	Isocitrate dehydrogenase [NADP], mitochondrial	Idh2	sp|P54071|IDHP_MOUSE Isocitrate dehydrogenase [NADP], mitochondrial OS=Mus musculus GN=Idh2 PE=1 SV=3	1	22	22	21	16	19	15	16	19	21	6	4	3	5	8	9	16	19	15	16	19	21	6	4	3	5	8	9	15	18	14	15	18	20	6	4	3	5	8	9	42.5	42.5
P54729	P54729	22	22	22	NEDD8 ultimate buster 1	Nub1	sp|P54729|NUB1_MOUSE NEDD8 ultimate buster 1 OS=Mus musculus GN=Nub1 PE=1 SV=2	1	22	22	22	12	13	12	12	14	14	6	7	7	4	10	11	12	13	12	12	14	14	6	7	7	4	10	11	12	13	12	12	14	14	6	7	7	4	10	11	39.6	39.6
P62137	P62137	22	22	5	Serine/threonine-protein phosphatase PP1-alpha catalytic subunit	Ppp1ca	sp|P62137|PP1A_MOUSE Serine/threonine-protein phosphatase PP1-alpha catalytic subunit OS=Mus musculus GN=Ppp1ca PE=1 SV=1	1	22	22	5	22	22	22	21	20	21	12	13	13	10	12	13	22	22	22	21	20	21	12	13	13	10	12	13	5	5	5	4	5	5	2	2	2	2	2	3	72.1	72.1
P62334	P62334	22	22	22	26S protease regulatory subunit 10B	Psmc6	sp|P62334|PRS10_MOUSE 26S proteasome regulatory subunit 10B OS=Mus musculus GN=Psmc6 PE=1 SV=1	1	22	22	22	22	22	20	20	22	22	16	18	13	11	18	17	22	22	20	20	22	22	16	18	13	11	18	17	22	22	20	20	22	22	16	18	13	11	18	17	60.9	60.9
P63154	P63154	22	22	22	Crooked neck-like protein 1	Crnkl1	sp|P63154|CRNL1_MOUSE Crooked neck-like protein 1 OS=Mus musculus GN=Crnkl1 PE=1 SV=1	1	22	22	22	20	19	16	17	18	18	13	14	9	6	12	11	20	19	16	17	18	18	13	14	9	6	12	11	20	19	16	17	18	18	13	14	9	6	12	11	32	32
P68040	P68040	22	22	22	Guanine nucleotide-binding protein subunit beta-2-like 1;Guanine nucleotide-binding protein subunit beta-2-like 1, N-terminally processed	Gnb2l1	sp|P68040|RACK1_MOUSE Receptor of activated protein C kinase 1 OS=Mus musculus GN=Rack1 PE=1 SV=3	1	22	22	22	22	21	19	20	21	22	14	14	10	9	15	13	22	21	19	20	21	22	14	14	10	9	15	13	22	21	19	20	21	22	14	14	10	9	15	13	85.2	85.2
P70698	P70698	22	22	21	CTP synthase 1	Ctps1	sp|P70698|PYRG1_MOUSE CTP synthase 1 OS=Mus musculus GN=Ctps1 PE=1 SV=2	1	22	22	21	21	18	19	17	19	20	9	10	7	4	9	11	21	18	19	17	19	20	9	10	7	4	9	11	20	17	18	16	18	19	8	9	6	3	8	10	46.9	46.9
P97807	P97807	22	22	22	Fumarate hydratase, mitochondrial	Fh	sp|P97807|FUMH_MOUSE Fumarate hydratase, mitochondrial OS=Mus musculus GN=Fh PE=1 SV=3	1	22	22	22	21	20	18	19	19	19	9	9	9	5	11	9	21	20	18	19	19	19	9	9	9	5	11	9	21	20	18	19	19	19	9	9	9	5	11	9	60	60
Q11011	Q11011	22	22	22	Puromycin-sensitive aminopeptidase	Npepps	sp|Q11011|PSA_MOUSE Puromycin-sensitive aminopeptidase OS=Mus musculus GN=Npepps PE=1 SV=2	1	22	22	22	17	18	19	18	20	21	4	2	2	3	11	8	17	18	19	18	20	21	4	2	2	3	11	8	17	18	19	18	20	21	4	2	2	3	11	8	35	35
Q3ULJ0;P13707	Q3ULJ0	22;2	22;2	21;2	Glycerol-3-phosphate dehydrogenase 1-like protein	Gpd1l	sp|Q3ULJ0|GPD1L_MOUSE Glycerol-3-phosphate dehydrogenase 1-like protein OS=Mus musculus GN=Gpd1l PE=1 SV=2	2	22	22	21	18	18	17	18	18	20	13	10	7	9	10	10	18	18	17	18	18	20	13	10	7	9	10	10	17	17	16	17	17	19	13	10	7	9	10	10	66.7	66.7
Q3V3V9	Q3V3V9	22	22	22	Leucine-rich repeat-containing protein 16C	Rltpr	sp|Q3V3V9|CARL2_MOUSE Capping protein, Arp2/3 and myosin-I linker protein 2 OS=Mus musculus GN=Carmil2 PE=1 SV=2	1	22	22	22	18	17	16	16	17	17	9	6	7	8	10	12	18	17	16	16	17	17	9	6	7	8	10	12	18	17	16	16	17	17	9	6	7	8	10	12	23.1	23.1
Q5F2E7	Q5F2E7	22	22	22	Nuclear fragile X mental retardation-interacting protein 2	Nufip2	sp|Q5F2E7|NUFP2_MOUSE Nuclear fragile X mental retardation-interacting protein 2 OS=Mus musculus GN=Nufip2 PE=1 SV=1	1	22	22	22	16	13	13	14	15	16	12	15	12	12	13	9	16	13	13	14	15	16	12	15	12	12	13	9	16	13	13	14	15	16	12	15	12	12	13	9	47	47
Q60664	Q60664	22	22	22	Lymphoid-restricted membrane protein;Processed lymphoid-restricted membrane protein	Lrmp	sp|Q60664|LRMP_MOUSE Lymphoid-restricted membrane protein OS=Mus musculus GN=Lrmp PE=1 SV=1	1	22	22	22	22	21	22	21	22	22	20	15	15	12	15	13	22	21	22	21	22	22	20	15	15	12	15	13	22	21	22	21	22	22	20	15	15	12	15	13	44.2	44.2
Q61074	Q61074	22	22	22	Protein phosphatase 1G	Ppm1g	sp|Q61074|PPM1G_MOUSE Protein phosphatase 1G OS=Mus musculus GN=Ppm1g PE=1 SV=3	1	22	22	22	20	22	19	19	17	20	6	10	8	9	8	12	20	22	19	19	17	20	6	10	8	9	8	12	20	22	19	19	17	20	6	10	8	9	8	12	51.8	51.8
Q61136	Q61136	22	22	22	Serine/threonine-protein kinase PRP4 homolog	Prpf4b	sp|Q61136|PRP4B_MOUSE Serine/threonine-protein kinase PRP4 homolog OS=Mus musculus GN=Prpf4b PE=1 SV=3	1	22	22	22	18	15	14	15	14	17	13	14	10	12	11	15	18	15	14	15	14	17	13	14	10	12	11	15	18	15	14	15	14	17	13	14	10	12	11	15	24.3	24.3
Q61550	Q61550	22	22	22	Double-strand-break repair protein rad21 homolog	Rad21	sp|Q61550|RAD21_MOUSE Double-strand-break repair protein rad21 homolog OS=Mus musculus GN=Rad21 PE=1 SV=3	1	22	22	22	16	15	14	16	16	18	5	7	6	8	12	10	16	15	14	16	16	18	5	7	6	8	12	10	16	15	14	16	16	18	5	7	6	8	12	10	44.6	44.6
Q62418	Q62418	22	22	22	Drebrin-like protein	Dbnl	sp|Q62418|DBNL_MOUSE Drebrin-like protein OS=Mus musculus GN=Dbnl PE=1 SV=2	1	22	22	22	21	21	18	21	19	19	9	10	7	8	13	14	21	21	18	21	19	19	9	10	7	8	13	14	21	21	18	21	19	19	9	10	7	8	13	14	56.4	56.4
Q64518	Q64518	28	22	20	Sarcoplasmic/endoplasmic reticulum calcium ATPase 3	Atp2a3	sp|Q64518|AT2A3_MOUSE Sarcoplasmic/endoplasmic reticulum calcium ATPase 3 OS=Mus musculus GN=Atp2a3 PE=1 SV=3	1	28	22	20	24	26	23	22	23	24	20	12	11	8	17	15	18	20	19	17	17	19	15	9	7	4	13	11	16	19	17	15	15	17	14	9	6	4	11	10	32.5	25.7
Q6NZQ2	Q6NZQ2	22	22	22		Ddx31	sp|Q6NZQ2|DDX31_MOUSE Probable ATP-dependent RNA helicase DDX31 OS=Mus musculus GN=Ddx31 PE=2 SV=2	1	22	22	22	18	17	15	18	19	19	9	12	14	8	11	11	18	17	15	18	19	19	9	12	14	8	11	11	18	17	15	18	19	19	9	12	14	8	11	11	48.8	48.8
Q6PG16	Q6PG16	22	22	22	Holliday junction recognition protein	Hjurp	sp|Q6PG16|HJURP_MOUSE Holliday junction recognition protein OS=Mus musculus GN=Hjurp PE=1 SV=1	1	22	22	22	18	18	16	18	14	11	11	13	11	11	13	12	18	18	16	18	14	11	11	13	11	11	13	12	18	18	16	18	14	11	11	13	11	11	13	12	40	40
Q6PGG6	Q6PGG6	22	22	22	Guanine nucleotide-binding protein-like 3-like protein	Gnl3l	sp|Q6PGG6|GNL3L_MOUSE Guanine nucleotide-binding protein-like 3-like protein OS=Mus musculus GN=Gnl3l PE=1 SV=1	1	22	22	22	15	17	15	14	14	15	11	11	8	5	11	6	15	17	15	14	14	15	11	11	8	5	11	6	15	17	15	14	14	15	11	11	8	5	11	6	39.2	39.2
Q6WKZ8	Q6WKZ8	22	22	22	E3 ubiquitin-protein ligase UBR2	Ubr2	sp|Q6WKZ8|UBR2_MOUSE E3 ubiquitin-protein ligase UBR2 OS=Mus musculus GN=Ubr2 PE=1 SV=2	1	22	22	22	18	16	15	18	18	18	1	3	1	3	5	5	18	16	15	18	18	18	1	3	1	3	5	5	18	16	15	18	18	18	1	3	1	3	5	5	16.4	16.4
Q6ZQ88	Q6ZQ88	22	22	22	Lysine-specific histone demethylase 1A	Kdm1a	sp|Q6ZQ88|KDM1A_MOUSE Lysine-specific histone demethylase 1A OS=Mus musculus GN=Kdm1a PE=1 SV=2	1	22	22	22	19	17	16	19	19	18	8	11	4	7	10	10	19	17	16	19	19	18	8	11	4	7	10	10	19	17	16	19	19	18	8	11	4	7	10	10	30.4	30.4
Q7TPD0	Q7TPD0	22	22	22	Integrator complex subunit 3	Ints3	sp|Q7TPD0|INT3_MOUSE Integrator complex subunit 3 OS=Mus musculus GN=Ints3 PE=1 SV=2	1	22	22	22	15	17	16	14	15	15	6	6	5	3	5	7	15	17	16	14	15	15	6	6	5	3	5	7	15	17	16	14	15	15	6	6	5	3	5	7	31.9	31.9
Q80X50	Q80X50	22	22	22	Ubiquitin-associated protein 2-like	Ubap2l	sp|Q80X50|UBP2L_MOUSE Ubiquitin-associated protein 2-like OS=Mus musculus GN=Ubap2l PE=1 SV=1	1	22	22	22	18	19	19	17	17	18	10	13	9	10	12	12	18	19	19	17	17	18	10	13	9	10	12	12	18	19	19	17	17	18	10	13	9	10	12	12	32.1	32.1
Q80YV3	Q80YV3	22	22	22	Transformation/transcription domain-associated protein	Trrap	sp|Q80YV3|TRRAP_MOUSE Transformation/transcription domain-associated protein OS=Mus musculus GN=Trrap PE=1 SV=2	1	22	22	22	15	10	10	12	11	9	8	4	7	8	4	6	15	10	10	12	11	9	8	4	7	8	4	6	15	10	10	12	11	9	8	4	7	8	4	6	11.2	11.2
Q8BK64	Q8BK64	22	22	22	Activator of 90 kDa heat shock protein ATPase homolog 1	Ahsa1	sp|Q8BK64|AHSA1_MOUSE Activator of 90 kDa heat shock protein ATPase homolog 1 OS=Mus musculus GN=Ahsa1 PE=1 SV=2	1	22	22	22	19	19	15	17	19	19	10	8	10	8	13	10	19	19	15	17	19	19	10	8	10	8	13	10	19	19	15	17	19	19	10	8	10	8	13	10	66.9	66.9
Q8BUK6	Q8BUK6	22	22	22	Protein Hook homolog 3	Hook3	sp|Q8BUK6|HOOK3_MOUSE Protein Hook homolog 3 OS=Mus musculus GN=Hook3 PE=1 SV=2	1	22	22	22	16	16	15	16	13	16	10	7	9	5	13	7	16	16	15	16	13	16	10	7	9	5	13	7	16	16	15	16	13	16	10	7	9	5	13	7	35.7	35.7
Q8BYA0	Q8BYA0	22	22	22	Tubulin-specific chaperone D	Tbcd	sp|Q8BYA0|TBCD_MOUSE Tubulin-specific chaperone D OS=Mus musculus GN=Tbcd PE=1 SV=1	1	22	22	22	18	18	18	15	20	20	5	5	4	6	8	8	18	18	18	15	20	20	5	5	4	6	8	8	18	18	18	15	20	20	5	5	4	6	8	8	25.4	25.4
Q8BZH4	Q8BZH4	22	22	22	Pogo transposable element with ZNF domain	Pogz	sp|Q8BZH4|POGZ_MOUSE Pogo transposable element with ZNF domain OS=Mus musculus GN=Pogz PE=1 SV=2	1	22	22	22	17	17	14	14	16	16	6	5	5	6	7	6	17	17	14	14	16	16	6	5	5	6	7	6	17	17	14	14	16	16	6	5	5	6	7	6	21.4	21.4
Q8C2K1	Q8C2K1	22	22	22	Differentially expressed in FDCP 6	Def6	sp|Q8C2K1|DEFI6_MOUSE Differentially expressed in FDCP 6 OS=Mus musculus GN=Def6 PE=1 SV=1	1	22	22	22	20	15	14	19	17	17	5	7	6	4	8	10	20	15	14	19	17	17	5	7	6	4	8	10	20	15	14	19	17	17	5	7	6	4	8	10	34.6	34.6
Q8CGC6	Q8CGC6	22	22	22	RNA-binding protein 28	Rbm28	sp|Q8CGC6|RBM28_MOUSE RNA-binding protein 28 OS=Mus musculus GN=Rbm28 PE=1 SV=4	1	22	22	22	18	18	13	16	13	15	10	12	10	9	12	10	18	18	13	16	13	15	10	12	10	9	12	10	18	18	13	16	13	15	10	12	10	9	12	10	34.1	34.1
Q8CHI8	Q8CHI8	22	22	22	E1A-binding protein p400	Ep400	sp|Q8CHI8|EP400_MOUSE E1A-binding protein p400 OS=Mus musculus GN=Ep400 PE=1 SV=3	1	22	22	22	12	13	13	11	13	11	4	4	2	2	4	5	12	13	13	11	13	11	4	4	2	2	4	5	12	13	13	11	13	11	4	4	2	2	4	5	8.6	8.6
Q8CJ27	Q8CJ27	22	22	22	Abnormal spindle-like microcephaly-associated protein homolog	Aspm	sp|Q8CJ27|ASPM_MOUSE Abnormal spindle-like microcephaly-associated protein homolog OS=Mus musculus GN=Aspm PE=1 SV=2	1	22	22	22	13	15	15	12	14	17	14	8	6	10	11	7	13	15	15	12	14	17	14	8	6	10	11	7	13	15	15	12	14	17	14	8	6	10	11	7	8.5	8.5
Q8K1M6	Q8K1M6	22	22	22	Dynamin-1-like protein	Dnm1l	sp|Q8K1M6|DNM1L_MOUSE Dynamin-1-like protein OS=Mus musculus GN=Dnm1l PE=1 SV=2	1	22	22	22	19	17	14	16	18	19	9	9	7	8	10	8	19	17	14	16	18	19	9	9	7	8	10	8	19	17	14	16	18	19	9	9	7	8	10	8	41.1	41.1
Q8K298	Q8K298	22	22	22	Actin-binding protein anillin	Anln	sp|Q8K298|ANLN_MOUSE Anillin OS=Mus musculus GN=Anln PE=1 SV=2	1	22	22	22	18	17	17	16	16	19	9	11	8	11	9	10	18	17	17	16	16	19	9	11	8	11	9	10	18	17	17	16	16	19	9	11	8	11	9	10	24.5	24.5
Q8R311;Q91ZV0	Q8R311;Q91ZV0	22;22	22;22	22;22	cTAGE family member 5;Melanoma inhibitory activity protein 2	Ctage5;Mia2	sp|Q8R311|CTGE5_MOUSE Endoplasmic reticulum export factor CTAGE5 OS=Mus musculus GN=Ctage5 PE=2 SV=1;sp|Q91ZV0|MIA2_MOUSE Melanoma inhibitory activity protein 2 OS=Mus musculus GN=Mia2 PE=1 SV=3	2	22	22	22	17	19	16	19	17	16	8	8	6	4	6	9	17	19	16	19	17	16	8	8	6	4	6	9	17	19	16	19	17	16	8	8	6	4	6	9	31.8	31.8
Q8VDP3	Q8VDP3	22	22	22	Protein-methionine sulfoxide oxidase MICAL1	Mical1	sp|Q8VDP3|MICA1_MOUSE [F-actin]-monooxygenase MICAL1 OS=Mus musculus GN=Mical1 PE=1 SV=1	1	22	22	22	17	18	17	19	18	18	8	8	7	7	14	10	17	18	17	19	18	18	8	8	7	7	14	10	17	18	17	19	18	18	8	8	7	7	14	10	33.8	33.8
Q91WJ8	Q91WJ8	25	22	22	Far upstream element-binding protein 1	Fubp1	sp|Q91WJ8|FUBP1_MOUSE Far upstream element-binding protein 1 OS=Mus musculus GN=Fubp1 PE=1 SV=1	1	25	22	22	23	24	19	23	22	24	8	9	9	4	10	10	20	21	18	21	20	21	7	7	6	4	8	9	20	21	18	21	20	21	7	7	6	4	8	9	40.4	37.9
Q91YE7	Q91YE7	22	22	22	RNA-binding protein 5	Rbm5	sp|Q91YE7|RBM5_MOUSE RNA-binding protein 5 OS=Mus musculus GN=Rbm5 PE=1 SV=1	1	22	22	22	17	15	15	18	19	17	13	15	6	9	13	9	17	15	15	18	19	17	13	15	6	9	13	9	17	15	15	18	19	17	13	15	6	9	13	9	35.2	35.2
Q99JR8	Q99JR8	22	22	18	SWI/SNF-related matrix-associated actin-dependent regulator of chromatin subfamily D member 2	Smarcd2	sp|Q99JR8|SMRD2_MOUSE SWI/SNF-related matrix-associated actin-dependent regulator of chromatin subfamily D member 2 OS=Mus musculus GN=Smarcd2 PE=1 SV=2	1	22	22	18	18	18	15	17	19	17	12	13	10	8	11	12	18	18	15	17	19	17	12	13	10	8	11	12	14	15	11	14	15	13	9	10	8	5	9	10	50.7	50.7
Q99JY0	Q99JY0	22	22	22	Trifunctional enzyme subunit beta, mitochondrial;3-ketoacyl-CoA thiolase	Hadhb	sp|Q99JY0|ECHB_MOUSE Trifunctional enzyme subunit beta, mitochondrial OS=Mus musculus GN=Hadhb PE=1 SV=1	1	22	22	22	21	22	20	21	16	18	12	12	12	12	11	9	21	22	20	21	16	18	12	12	12	12	11	9	21	22	20	21	16	18	12	12	12	12	11	9	54.5	54.5
Q9DC61	Q9DC61	22	22	22	Mitochondrial-processing peptidase subunit alpha	Pmpca	sp|Q9DC61|MPPA_MOUSE Mitochondrial-processing peptidase subunit alpha OS=Mus musculus GN=Pmpca PE=1 SV=1	1	22	22	22	18	19	16	15	16	16	2	4	1	1	1	2	18	19	16	15	16	16	2	4	1	1	1	2	18	19	16	15	16	16	2	4	1	1	1	2	49.6	49.6
Q9ESX5	Q9ESX5	22	22	22	H/ACA ribonucleoprotein complex subunit 4	Dkc1	sp|Q9ESX5|DKC1_MOUSE H/ACA ribonucleoprotein complex subunit 4 OS=Mus musculus GN=Dkc1 PE=1 SV=4	1	22	22	22	21	21	20	19	18	19	15	12	15	11	13	13	21	21	20	19	18	19	15	12	15	11	13	13	21	21	20	19	18	19	15	12	15	11	13	13	45.8	45.8
Q9QYJ0	Q9QYJ0	22	22	22	DnaJ homolog subfamily A member 2	Dnaja2	sp|Q9QYJ0|DNJA2_MOUSE DnaJ homolog subfamily A member 2 OS=Mus musculus GN=Dnaja2 PE=1 SV=1	1	22	22	22	20	18	16	18	17	19	13	14	11	11	12	14	20	18	16	18	17	19	13	14	11	11	12	14	20	18	16	18	17	19	13	14	11	11	12	14	67.2	67.2
Q9WVM1	Q9WVM1	22	22	22	Rac GTPase-activating protein 1	Racgap1	sp|Q9WVM1|RGAP1_MOUSE Rac GTPase-activating protein 1 OS=Mus musculus GN=Racgap1 PE=1 SV=1	1	22	22	22	16	16	17	17	18	18	15	16	12	12	13	15	16	16	17	17	18	18	15	16	12	12	13	15	16	16	17	17	18	18	15	16	12	12	13	15	45.1	45.1
A2AIV2	A2AIV2	21	21	21	Protein virilizer homolog	Kiaa1429	sp|A2AIV2|VIR_MOUSE Protein virilizer homolog OS=Mus musculus GN=Virma PE=1 SV=1	1	21	21	21	16	15	16	16	16	16	5	3	4	6	6	4	16	15	16	16	16	16	5	3	4	6	6	4	16	15	16	16	16	16	5	3	4	6	6	4	15	15
D3YXK2	D3YXK2	33	21	21	Scaffold attachment factor B1	Safb	sp|D3YXK2|SAFB1_MOUSE Scaffold attachment factor B1 OS=Mus musculus GN=Safb PE=1 SV=2	1	33	21	21	32	29	21	32	27	26	7	13	8	8	7	8	21	18	10	21	17	17	4	8	6	7	5	6	21	18	10	21	17	17	4	8	6	7	5	6	32.9	22.9
O08539	O08539	21	21	19	Myc box-dependent-interacting protein 1	Bin1	sp|O08539|BIN1_MOUSE Myc box-dependent-interacting protein 1 OS=Mus musculus GN=Bin1 PE=1 SV=1	1	21	21	19	20	21	16	18	18	19	10	11	7	9	12	15	20	21	16	18	18	19	10	11	7	9	12	15	18	19	15	16	17	17	8	10	7	9	10	14	46.3	46.3
O35904	O35904	21	21	20	Phosphatidylinositol 4,5-bisphosphate 3-kinase catalytic subunit delta isoform	Pik3cd	sp|O35904|PK3CD_MOUSE Phosphatidylinositol 4,5-bisphosphate 3-kinase catalytic subunit delta isoform OS=Mus musculus GN=Pik3cd PE=1 SV=2	1	21	21	20	15	17	15	16	17	17	7	4	4	1	6	9	15	17	15	16	17	17	7	4	4	1	6	9	14	16	14	15	16	16	6	4	4	1	5	8	29.1	29.1
O54774	O54774	21	21	21	AP-3 complex subunit delta-1	Ap3d1	sp|O54774|AP3D1_MOUSE AP-3 complex subunit delta-1 OS=Mus musculus GN=Ap3d1 PE=1 SV=1	1	21	21	21	18	16	14	16	14	15	8	6	7	4	9	7	18	16	14	16	14	15	8	6	7	4	9	7	18	16	14	16	14	15	8	6	7	4	9	7	21.9	21.9
P08752;B2RSH2	P08752	21;8	21;8	14;1	Guanine nucleotide-binding protein G(i) subunit alpha-2	Gnai2	sp|P08752|GNAI2_MOUSE Guanine nucleotide-binding protein G(i) subunit alpha-2 OS=Mus musculus GN=Gnai2 PE=1 SV=5	2	21	21	14	18	19	18	18	17	17	12	12	14	13	14	12	18	19	18	18	17	17	12	12	14	13	14	12	13	12	12	12	13	12	8	8	9	8	8	8	60.6	60.6
P17918	P17918	21	21	21	Proliferating cell nuclear antigen	Pcna	sp|P17918|PCNA_MOUSE Proliferating cell nuclear antigen OS=Mus musculus GN=Pcna PE=1 SV=2	1	21	21	21	21	21	19	21	19	20	14	13	14	12	16	17	21	21	19	21	19	20	14	13	14	12	16	17	21	21	19	21	19	20	14	13	14	12	16	17	92.7	92.7
P18155;D3YZG8	P18155	21;1	21;1	21;1	Bifunctional methylenetetrahydrofolate dehydrogenase/cyclohydrolase, mitochondrial;NAD-dependent methylenetetrahydrofolate dehydrogenase;Methenyltetrahydrofolate cyclohydrolase	Mthfd2	sp|P18155|MTDC_MOUSE Bifunctional methylenetetrahydrofolate dehydrogenase/cyclohydrolase, mitochondrial OS=Mus musculus GN=Mthfd2 PE=1 SV=1	2	21	21	21	18	16	13	18	17	16	6	5	6	2	5	5	18	16	13	18	17	16	6	5	6	2	5	5	18	16	13	18	17	16	6	5	6	2	5	5	61.1	61.1
P35329	P35329	21	21	21	B-cell receptor CD22	Cd22	sp|P35329|CD22_MOUSE B-cell receptor CD22 OS=Mus musculus GN=Cd22 PE=1 SV=1	1	21	21	21	20	18	14	18	16	14	6	5	2	5	1	3	20	18	14	18	16	14	6	5	2	5	1	3	20	18	14	18	16	14	6	5	2	5	1	3	38.5	38.5
P35486	P35486	21	21	21	Pyruvate dehydrogenase E1 component subunit alpha, somatic form, mitochondrial	Pdha1	sp|P35486|ODPA_MOUSE Pyruvate dehydrogenase E1 component subunit alpha, somatic form, mitochondrial OS=Mus musculus GN=Pdha1 PE=1 SV=1	1	21	21	21	18	17	16	17	16	16	6	5	7	2	6	6	18	17	16	17	16	16	6	5	7	2	6	6	18	17	16	17	16	16	6	5	7	2	6	6	60.8	60.8
P35991;Q60629;P29319;Q8CBF3;P54763;P54761;P54754;Q61772;Q62413	P35991	21;1;1;1;1;1;1;1;1	21;1;1;1;1;1;1;1;1	20;0;0;0;0;0;0;0;0	Tyrosine-protein kinase BTK	Btk	sp|P35991|BTK_MOUSE Tyrosine-protein kinase BTK OS=Mus musculus GN=Btk PE=1 SV=4	9	21	21	20	18	16	16	15	19	19	13	12	11	10	14	17	18	16	16	15	19	19	13	12	11	10	14	17	17	15	15	14	18	18	12	11	10	9	13	16	43.7	43.7
P42859	P42859	21	21	21	Huntingtin	Htt	sp|P42859|HD_MOUSE Huntingtin OS=Mus musculus GN=Htt PE=1 SV=2	1	21	21	21	15	12	16	13	13	13	2	3	5	3	8	6	15	12	16	13	13	13	2	3	5	3	8	6	15	12	16	13	13	13	2	3	5	3	8	6	9	9
P47963	P47963	21	21	21	60S ribosomal protein L13	Rpl13	sp|P47963|RL13_MOUSE 60S ribosomal protein L13 OS=Mus musculus GN=Rpl13 PE=1 SV=3	1	21	21	21	18	21	15	16	17	17	8	11	9	8	12	11	18	21	15	16	17	17	8	11	9	8	12	11	18	21	15	16	17	17	8	11	9	8	12	11	62.1	62.1
P49710	P49710	21	21	21	Hematopoietic lineage cell-specific protein	Hcls1	sp|P49710|HCLS1_MOUSE Hematopoietic lineage cell-specific protein OS=Mus musculus GN=Hcls1 PE=1 SV=2	1	21	21	21	20	19	19	19	18	18	4	2	3	1	6	6	20	19	19	19	18	18	4	2	3	1	6	6	20	19	19	19	18	18	4	2	3	1	6	6	45.7	45.7
P50431	P50431	21	21	21	Serine hydroxymethyltransferase, cytosolic	Shmt1	sp|P50431|GLYC_MOUSE Serine hydroxymethyltransferase, cytosolic OS=Mus musculus GN=Shmt1 PE=1 SV=3	1	21	21	21	17	19	19	18	16	18	12	12	7	11	12	14	17	19	19	18	16	18	12	12	7	11	12	14	17	19	19	18	16	18	12	12	7	11	12	14	59.4	59.4
P63158	P63158	21	21	18	High mobility group protein B1	Hmgb1	sp|P63158|HMGB1_MOUSE High mobility group protein B1 OS=Mus musculus GN=Hmgb1 PE=1 SV=2	1	21	21	18	20	19	19	20	21	21	12	7	11	7	12	12	20	19	19	20	21	21	12	7	11	7	12	12	17	16	16	17	18	18	11	6	10	7	11	11	65.6	65.6
P67778	P67778	21	21	21	Prohibitin	Phb	sp|P67778|PHB_MOUSE Prohibitin OS=Mus musculus GN=Phb PE=1 SV=1	1	21	21	21	20	21	18	18	19	20	17	14	12	12	17	11	20	21	18	18	19	20	17	14	12	12	17	11	20	21	18	18	19	20	17	14	12	12	17	11	72.1	72.1
P70290	P70290	21	21	21	55 kDa erythrocyte membrane protein	Mpp1	sp|P70290|EM55_MOUSE 55 kDa erythrocyte membrane protein OS=Mus musculus GN=Mpp1 PE=1 SV=1	1	21	21	21	19	18	17	19	19	17	9	8	8	9	9	11	19	18	17	19	19	17	9	8	8	9	9	11	19	18	17	19	19	17	9	8	8	9	9	11	70.2	70.2
P70441	P70441	21	21	21	Na(+)/H(+) exchange regulatory cofactor NHE-RF1	Slc9a3r1	sp|P70441|NHRF1_MOUSE Na(+)/H(+) exchange regulatory cofactor NHE-RF1 OS=Mus musculus GN=Slc9a3r1 PE=1 SV=3	1	21	21	21	20	18	17	17	17	17	5	4	5	4	9	6	20	18	17	17	17	17	5	4	5	4	9	6	20	18	17	17	17	17	5	4	5	4	9	6	65.1	65.1
P83741;Q80UE6	P83741	21;1	21;1	16;0	Serine/threonine-protein kinase WNK1	Wnk1	sp|P83741|WNK1_MOUSE Serine/threonine-protein kinase WNK1 OS=Mus musculus GN=Wnk1 PE=1 SV=2	2	21	21	16	18	18	13	15	17	17	8	6	4	3	6	6	18	18	13	15	17	17	8	6	4	3	6	6	13	13	8	11	13	13	4	5	3	2	2	4	10.1	10.1
Q07832	Q07832	21	21	21	Serine/threonine-protein kinase PLK1	Plk1	sp|Q07832|PLK1_MOUSE Serine/threonine-protein kinase PLK1 OS=Mus musculus GN=Plk1 PE=1 SV=2	1	21	21	21	19	14	14	17	16	19	9	9	7	5	10	6	19	14	14	17	16	19	9	9	7	5	10	6	19	14	14	17	16	19	9	9	7	5	10	6	47.1	47.1
Q0P678;REV__Q0P678	Q0P678	21;1	21;1	21;1	Zinc finger CCCH domain-containing protein 18	Zc3h18	sp|Q0P678|ZCH18_MOUSE Zinc finger CCCH domain-containing protein 18 OS=Mus musculus GN=Zc3h18 PE=1 SV=1	2	21	21	21	18	19	13	16	16	17	12	12	12	10	12	10	18	19	13	16	16	17	12	12	12	10	12	10	18	19	13	16	16	17	12	12	12	10	12	10	31.8	31.8
Q3U319	Q3U319	23	21	21	E3 ubiquitin-protein ligase BRE1B	Rnf40	sp|Q3U319|BRE1B_MOUSE E3 ubiquitin-protein ligase BRE1B OS=Mus musculus GN=Rnf40 PE=1 SV=2	1	23	21	21	21	19	18	18	20	18	6	7	5	5	6	10	19	17	16	17	18	17	6	6	5	5	6	9	19	17	16	17	18	17	6	6	5	5	6	9	30.2	27.4
Q3UKC1	Q3UKC1	21	21	21	Tax1-binding protein 1 homolog	Tax1bp1	sp|Q3UKC1|TAXB1_MOUSE Tax1-binding protein 1 homolog OS=Mus musculus GN=Tax1bp1 PE=1 SV=2	1	21	21	21	18	18	13	16	17	16	6	4	5	3	5	7	18	18	13	16	17	16	6	4	5	3	5	7	18	18	13	16	17	16	6	4	5	3	5	7	30.7	30.7
Q3UM45	Q3UM45	21	21	21	Protein phosphatase 1 regulatory subunit 7	Ppp1r7	sp|Q3UM45|PP1R7_MOUSE Protein phosphatase 1 regulatory subunit 7 OS=Mus musculus GN=Ppp1r7 PE=1 SV=2	1	21	21	21	17	18	15	18	17	18	4	6	3	3	9	3	17	18	15	18	17	18	4	6	3	3	9	3	17	18	15	18	17	18	4	6	3	3	9	3	74.8	74.8
Q4QY64	Q4QY64	21	21	21	ATPase family AAA domain-containing protein 5	Atad5	sp|Q4QY64|ATAD5_MOUSE ATPase family AAA domain-containing protein 5 OS=Mus musculus GN=Atad5 PE=1 SV=1	1	21	21	21	18	15	14	15	18	14	8	10	7	5	8	6	18	15	14	15	18	14	8	10	7	5	8	6	18	15	14	15	18	14	8	10	7	5	8	6	14.1	14.1
Q4U2R1	Q4U2R1	21	21	21	E3 ubiquitin-protein ligase HERC2	Herc2	sp|Q4U2R1|HERC2_MOUSE E3 ubiquitin-protein ligase HERC2 OS=Mus musculus GN=Herc2 PE=1 SV=3	1	21	21	21	13	14	12	17	16	12	8	3	8	8	11	8	13	14	12	17	16	12	8	3	8	8	11	8	13	14	12	17	16	12	8	3	8	8	11	8	4.9	4.9
Q5BLK4	Q5BLK4	23	21	21	Terminal uridylyltransferase 7	Zcchc6	sp|Q5BLK4|TUT7_MOUSE Terminal uridylyltransferase 7 OS=Mus musculus GN=Zcchc6 PE=1 SV=3	1	23	21	21	15	17	18	15	19	13	10	8	8	8	9	10	14	16	16	14	17	11	9	8	7	8	8	10	14	16	16	14	17	11	9	8	7	8	8	10	22	20.8
Q5NC05	Q5NC05	21	21	21	Transcription termination factor 2	Ttf2	sp|Q5NC05|TTF2_MOUSE Transcription termination factor 2 OS=Mus musculus GN=Ttf2 PE=1 SV=2	1	21	21	21	16	15	11	14	14	13	7	3	4	3	8	8	16	15	11	14	14	13	7	3	4	3	8	8	16	15	11	14	14	13	7	3	4	3	8	8	21.3	21.3
Q5SSI6	Q5SSI6	21	21	21	U3 small nucleolar RNA-associated protein 18 homolog	Utp18	sp|Q5SSI6|UTP18_MOUSE U3 small nucleolar RNA-associated protein 18 homolog OS=Mus musculus GN=Utp18 PE=1 SV=1	1	21	21	21	17	17	16	15	13	15	12	12	12	11	13	12	17	17	16	15	13	15	12	12	12	11	13	12	17	17	16	15	13	15	12	12	12	11	13	12	49.1	49.1
Q5XJY5	Q5XJY5	21	21	21	Coatomer subunit delta	Arcn1	sp|Q5XJY5|COPD_MOUSE Coatomer subunit delta OS=Mus musculus GN=Arcn1 PE=1 SV=2	1	21	21	21	15	15	17	15	15	14	9	9	9	10	10	12	15	15	17	15	15	14	9	9	9	10	10	12	15	15	17	15	15	14	9	9	9	10	10	12	41.1	41.1
Q60668	Q60668	21	21	20	Heterogeneous nuclear ribonucleoprotein D0	Hnrnpd	sp|Q60668|HNRPD_MOUSE Heterogeneous nuclear ribonucleoprotein D0 OS=Mus musculus GN=Hnrnpd PE=1 SV=2	1	21	21	20	20	20	19	19	19	20	12	13	12	8	13	13	20	20	19	19	19	20	12	13	12	8	13	13	19	19	18	18	18	19	12	12	12	7	12	12	41.1	41.1
Q61937	Q61937	21	21	21	Nucleophosmin	Npm1	sp|Q61937|NPM_MOUSE Nucleophosmin OS=Mus musculus GN=Npm1 PE=1 SV=1	1	21	21	21	21	20	19	18	18	20	16	15	14	14	16	18	21	20	19	18	18	20	16	15	14	14	16	18	21	20	19	18	18	20	16	15	14	14	16	18	67.1	67.1
Q6PCM1	Q6PCM1	22	21	21	Lysine-specific demethylase 3A	Kdm3a	sp|Q6PCM1|KDM3A_MOUSE Lysine-specific demethylase 3A OS=Mus musculus GN=Kdm3a PE=1 SV=1	1	22	21	21	16	16	15	14	16	17	7	6	3	4	12	10	15	15	14	13	15	16	7	5	3	3	11	9	15	15	14	13	15	16	7	5	3	3	11	9	22.4	21.5
Q6ZQL4	Q6ZQL4	21	21	21	WD repeat-containing protein 43	Wdr43	sp|Q6ZQL4|WDR43_MOUSE WD repeat-containing protein 43 OS=Mus musculus GN=Wdr43 PE=2 SV=2	1	21	21	21	14	14	15	16	16	14	9	11	9	8	11	12	14	14	15	16	16	14	9	11	9	8	11	12	14	14	15	16	16	14	9	11	9	8	11	12	45.5	45.5
Q80Y44	Q80Y44	21	21	21	Probable ATP-dependent RNA helicase DDX10	Ddx10	sp|Q80Y44|DDX10_MOUSE Probable ATP-dependent RNA helicase DDX10 OS=Mus musculus GN=Ddx10 PE=1 SV=2	1	21	21	21	15	15	14	15	14	15	15	13	12	10	9	10	15	15	14	15	14	15	15	13	12	10	9	10	15	15	14	15	14	15	15	13	12	10	9	10	34.3	34.3
Q8BHJ9	Q8BHJ9	21	21	21	Pre-mRNA-splicing factor SLU7	Slu7	sp|Q8BHJ9|SLU7_MOUSE Pre-mRNA-splicing factor SLU7 OS=Mus musculus GN=Slu7 PE=1 SV=1	1	21	21	21	18	15	10	14	16	13	9	9	6	7	10	9	18	15	10	14	16	13	9	9	6	7	10	9	18	15	10	14	16	13	9	9	6	7	10	9	42.9	42.9
Q8BNV1	Q8BNV1	21	21	21	tRNA (uracil-5-)-methyltransferase homolog A	Trmt2a	sp|Q8BNV1|TRM2A_MOUSE tRNA (uracil-5-)-methyltransferase homolog A OS=Mus musculus GN=Trmt2a PE=1 SV=1	1	21	21	21	16	17	13	14	18	16	7	10	7	5	8	10	16	17	13	14	18	16	7	10	7	5	8	10	16	17	13	14	18	16	7	10	7	5	8	10	50.9	50.9
Q8BVY0	Q8BVY0	21	21	21	Ribosomal L1 domain-containing protein 1	Rsl1d1	sp|Q8BVY0|RL1D1_MOUSE Ribosomal L1 domain-containing protein 1 OS=Mus musculus GN=Rsl1d1 PE=1 SV=1	1	21	21	21	19	19	18	19	18	18	14	12	11	12	16	15	19	19	18	19	18	18	14	12	11	12	16	15	19	19	18	19	18	18	14	12	11	12	16	15	50.4	50.4
Q8C0C7	Q8C0C7	21	21	21	Phenylalanine--tRNA ligase alpha subunit	Farsa	sp|Q8C0C7|SYFA_MOUSE Phenylalanine--tRNA ligase alpha subunit OS=Mus musculus GN=Farsa PE=1 SV=1	1	21	21	21	19	18	16	19	17	19	11	9	8	9	14	14	19	18	16	19	17	19	11	9	8	9	14	14	19	18	16	19	17	19	11	9	8	9	14	14	53	53
Q8CGZ0	Q8CGZ0	21	21	21	Calcium homeostasis endoplasmic reticulum protein	Cherp	sp|Q8CGZ0|CHERP_MOUSE Calcium homeostasis endoplasmic reticulum protein OS=Mus musculus GN=Cherp PE=1 SV=1	1	21	21	21	20	19	17	19	19	19	14	14	12	11	11	11	20	19	17	19	19	19	14	14	12	11	11	11	20	19	17	19	19	19	14	14	12	11	11	11	26.3	26.3
Q8K2D3	Q8K2D3	21	21	21	Enhancer of mRNA-decapping protein 3	Edc3	sp|Q8K2D3|EDC3_MOUSE Enhancer of mRNA-decapping protein 3 OS=Mus musculus GN=Edc3 PE=1 SV=1	1	21	21	21	14	15	13	16	17	18	8	11	7	7	7	10	14	15	13	16	17	18	8	11	7	7	7	10	14	15	13	16	17	18	8	11	7	7	7	10	55.5	55.5
Q8R3N1	Q8R3N1	21	21	21	Nucleolar protein 14	Nop14	sp|Q8R3N1|NOP14_MOUSE Nucleolar protein 14 OS=Mus musculus GN=Nop14 PE=1 SV=2	1	21	21	21	15	18	16	17	17	19	12	11	10	10	9	9	15	18	16	17	17	19	12	11	10	10	9	9	15	18	16	17	17	19	12	11	10	10	9	9	29.5	29.5
Q8VCW8	Q8VCW8	21	21	21	Acyl-CoA synthetase family member 2, mitochondrial	Acsf2	sp|Q8VCW8|ACSF2_MOUSE Acyl-CoA synthetase family member 2, mitochondrial OS=Mus musculus GN=Acsf2 PE=1 SV=1	1	21	21	21	19	20	15	20	19	19	11	10	7	8	11	10	19	20	15	20	19	19	11	10	7	8	11	10	19	20	15	20	19	19	11	10	7	8	11	10	41.1	41.1
Q8VD65	Q8VD65	21	21	21	Phosphoinositide 3-kinase regulatory subunit 4	Pik3r4	sp|Q8VD65|PI3R4_MOUSE Phosphoinositide 3-kinase regulatory subunit 4 OS=Mus musculus GN=Pik3r4 PE=1 SV=3	1	21	21	21	15	16	16	13	17	16	9	7	6	6	8	10	15	16	16	13	17	16	9	7	6	6	8	10	15	16	16	13	17	16	9	7	6	6	8	10	18.6	18.6
Q99K48	Q99K48	23	21	21	Non-POU domain-containing octamer-binding protein	Nono	sp|Q99K48|NONO_MOUSE Non-POU domain-containing octamer-binding protein OS=Mus musculus GN=Nono PE=1 SV=3	1	23	21	21	18	19	21	19	19	20	13	11	10	9	16	15	17	18	19	18	18	19	11	9	10	7	14	13	17	18	19	18	18	19	11	9	10	7	14	13	41.9	39.7
Q99KE1;Q8BMF3	Q99KE1	21;1	21;1	21;1	NAD-dependent malic enzyme, mitochondrial	Me2	sp|Q99KE1|MAOM_MOUSE NAD-dependent malic enzyme, mitochondrial OS=Mus musculus GN=Me2 PE=1 SV=1	2	21	21	21	18	20	17	20	19	20	9	6	8	8	9	8	18	20	17	20	19	20	9	6	8	8	9	8	18	20	17	20	19	20	9	6	8	8	9	8	54.3	54.3
Q9CQC6	Q9CQC6	21	21	20	Basic leucine zipper and W2 domain-containing protein 1	Bzw1	sp|Q9CQC6|BZW1_MOUSE Basic leucine zipper and W2 domain-containing protein 1 OS=Mus musculus GN=Bzw1 PE=1 SV=1	1	21	21	20	15	17	11	17	16	15	7	11	8	10	12	13	15	17	11	17	16	15	7	11	8	10	12	13	14	16	10	16	15	14	7	11	8	10	12	13	44.6	44.6
Q9CZ13	Q9CZ13	21	21	20	Cytochrome b-c1 complex subunit 1, mitochondrial	Uqcrc1	sp|Q9CZ13|QCR1_MOUSE Cytochrome b-c1 complex subunit 1, mitochondrial OS=Mus musculus GN=Uqcrc1 PE=1 SV=2	1	21	21	20	20	20	17	21	18	18	10	7	5	8	4	6	20	20	17	21	18	18	10	7	5	8	4	6	19	19	17	20	18	17	9	7	5	7	4	6	57.1	57.1
Q9D0L8	Q9D0L8	21	21	21	mRNA cap guanine-N7 methyltransferase	Rnmt	sp|Q9D0L8|MCES_MOUSE mRNA cap guanine-N7 methyltransferase OS=Mus musculus GN=Rnmt PE=1 SV=1	1	21	21	21	16	17	16	18	16	17	7	9	4	3	8	9	16	17	16	18	16	17	7	9	4	3	8	9	16	17	16	18	16	17	7	9	4	3	8	9	52.9	52.9
Q9R0G7	Q9R0G7	21	21	17	Zinc finger E-box-binding homeobox 2	Zeb2	sp|Q9R0G7|ZEB2_MOUSE Zinc finger E-box-binding homeobox 2 OS=Mus musculus GN=Zeb2 PE=1 SV=2	1	21	21	17	19	18	14	17	16	18	7	10	8	6	14	14	19	18	14	17	16	18	7	10	8	6	14	14	15	15	11	14	14	15	7	9	8	6	12	12	21.4	21.4
Q9WUM4;Q920M5	Q9WUM4	21;1	21;1	21;1	Coronin-1C	Coro1c	sp|Q9WUM4|COR1C_MOUSE Coronin-1C OS=Mus musculus GN=Coro1c PE=1 SV=2	2	21	21	21	19	18	15	19	19	19	12	10	12	6	10	12	19	18	15	19	19	19	12	10	12	6	10	12	19	18	15	19	19	19	12	10	12	6	10	12	51.3	51.3
Q9WVJ2	Q9WVJ2	21	21	21	26S proteasome non-ATPase regulatory subunit 13	Psmd13	sp|Q9WVJ2|PSD13_MOUSE 26S proteasome non-ATPase regulatory subunit 13 OS=Mus musculus GN=Psmd13 PE=1 SV=1	1	21	21	21	18	17	16	17	21	19	12	12	7	12	11	11	18	17	16	17	21	19	12	12	7	12	11	11	18	17	16	17	21	19	12	12	7	12	11	11	66	66
Q9Z1Q5	Q9Z1Q5	21	21	21	Chloride intracellular channel protein 1	Clic1	sp|Q9Z1Q5|CLIC1_MOUSE Chloride intracellular channel protein 1 OS=Mus musculus GN=Clic1 PE=1 SV=3	1	21	21	21	18	19	18	19	19	18	13	13	10	11	15	17	18	19	18	19	19	18	13	13	10	11	15	17	18	19	18	19	19	18	13	13	10	11	15	17	87.1	87.1
A2AJK6	A2AJK6	28	20	19	Chromodomain-helicase-DNA-binding protein 7	Chd7	sp|A2AJK6|CHD7_MOUSE Chromodomain-helicase-DNA-binding protein 7 OS=Mus musculus GN=Chd7 PE=1 SV=1	1	28	20	19	23	17	17	19	20	19	15	18	11	15	15	12	15	10	10	11	12	12	10	11	7	9	8	8	14	9	9	10	11	11	9	10	7	8	8	7	11.1	8.4
E9Q7E2	E9Q7E2	20	20	20		Arid2	sp|E9Q7E2|ARID2_MOUSE AT-rich interactive domain-containing protein 2 OS=Mus musculus GN=Arid2 PE=1 SV=1	1	20	20	20	15	14	13	15	17	14	8	7	7	9	9	7	15	14	13	15	17	14	8	7	7	9	9	7	15	14	13	15	17	14	8	7	7	9	9	7	15.9	15.9
O08663	O08663	20	20	20	Methionine aminopeptidase 2	Metap2	sp|O08663|MAP2_MOUSE Methionine aminopeptidase 2 OS=Mus musculus GN=Metap2 PE=1 SV=1	1	20	20	20	15	18	15	16	11	14	7	9	6	6	5	6	15	18	15	16	11	14	7	9	6	6	5	6	15	18	15	16	11	14	7	9	6	6	5	6	61.7	61.7
O08796	O08796	20	20	20	Eukaryotic elongation factor 2 kinase	Eef2k	sp|O08796|EF2K_MOUSE Eukaryotic elongation factor 2 kinase OS=Mus musculus GN=Eef2k PE=1 SV=1	1	20	20	20	12	13	12	13	15	12	5	3	5	4	8	7	12	13	12	13	15	12	5	3	5	4	8	7	12	13	12	13	15	12	5	3	5	4	8	7	36.2	36.2
O09106	O09106	20	20	14	Histone deacetylase 1	Hdac1	sp|O09106|HDAC1_MOUSE Histone deacetylase 1 OS=Mus musculus GN=Hdac1 PE=1 SV=1	1	20	20	14	18	19	17	16	17	19	13	11	14	10	13	11	18	19	17	16	17	19	13	11	14	10	13	11	13	13	11	11	12	13	10	9	9	6	10	8	45.9	45.9
O35887	O35887	20	20	20	Calumenin	Calu	sp|O35887|CALU_MOUSE Calumenin OS=Mus musculus GN=Calu PE=1 SV=1	1	20	20	20	19	19	18	19	17	18	15	15	13	12	14	16	19	19	18	19	17	18	15	15	13	12	14	16	19	19	18	19	17	18	15	15	13	12	14	16	67.6	67.6
O88286	O88286	20	20	20	Protein Wiz	Wiz	sp|O88286|WIZ_MOUSE Protein Wiz OS=Mus musculus GN=Wiz PE=1 SV=2	1	20	20	20	14	16	12	13	14	15	9	10	8	8	12	12	14	16	12	13	14	15	9	10	8	8	12	12	14	16	12	13	14	15	9	10	8	8	12	12	16.5	16.5
O88351	O88351	20	20	19	Inhibitor of nuclear factor kappa-B kinase subunit beta	Ikbkb	sp|O88351|IKKB_MOUSE Inhibitor of nuclear factor kappa-B kinase subunit beta OS=Mus musculus GN=Ikbkb PE=1 SV=1	1	20	20	19	18	14	17	15	16	16	8	8	6	4	7	8	18	14	17	15	16	16	8	8	6	4	7	8	17	13	16	14	15	15	7	7	5	3	7	7	32	32
O88447	O88447	20	20	14	Kinesin light chain 1	Klc1	sp|O88447|KLC1_MOUSE Kinesin light chain 1 OS=Mus musculus GN=Klc1 PE=1 SV=3	1	20	20	14	14	16	15	16	16	17	10	9	5	5	12	8	14	16	15	16	16	17	10	9	5	5	12	8	10	11	11	13	12	12	8	8	4	4	9	6	40.7	40.7
P05202	P05202	20	20	20	Aspartate aminotransferase, mitochondrial	Got2	sp|P05202|AATM_MOUSE Aspartate aminotransferase, mitochondrial OS=Mus musculus GN=Got2 PE=1 SV=1	1	20	20	20	19	19	20	18	19	18	3	4	5	3	4	3	19	19	20	18	19	18	3	4	5	3	4	3	19	19	20	18	19	18	3	4	5	3	4	3	50	50
P13020	P13020	20	20	10	Gelsolin	Gsn	sp|P13020|GELS_MOUSE Gelsolin OS=Mus musculus GN=Gsn PE=1 SV=3	1	20	20	10	18	19	12	13	19	19	8	7	7	5	10	11	18	19	12	13	19	19	8	7	7	5	10	11	9	9	6	5	10	10	3	3	2	2	6	6	32.8	32.8
P17751	P17751	20	20	20	Triosephosphate isomerase	Tpi1	sp|P17751|TPIS_MOUSE Triosephosphate isomerase OS=Mus musculus GN=Tpi1 PE=1 SV=4	1	20	20	20	18	18	16	17	18	17	12	11	10	11	14	13	18	18	16	17	18	17	12	11	10	11	14	13	18	18	16	17	18	17	12	11	10	11	14	13	75.3	75.3
P21619	P21619	26	20	20	Lamin-B2	Lmnb2	sp|P21619|LMNB2_MOUSE Lamin-B2 OS=Mus musculus GN=Lmnb2 PE=1 SV=2	1	26	20	20	21	20	17	20	19	22	7	10	7	6	11	6	16	15	12	15	14	16	4	6	4	3	5	3	16	15	12	15	14	16	4	6	4	3	5	3	43.6	37.1
P25444	P25444	20	20	20	40S ribosomal protein S2	Rps2	sp|P25444|RS2_MOUSE 40S ribosomal protein S2 OS=Mus musculus GN=Rps2 PE=1 SV=3	1	20	20	20	20	20	19	19	20	18	15	15	12	13	15	14	20	20	19	19	20	18	15	15	12	13	15	14	20	20	19	19	20	18	15	15	12	13	15	14	51.9	51.9
P28656	P28656	20	20	18	Nucleosome assembly protein 1-like 1	Nap1l1	sp|P28656|NP1L1_MOUSE Nucleosome assembly protein 1-like 1 OS=Mus musculus GN=Nap1l1 PE=1 SV=2	1	20	20	18	18	19	19	18	19	18	14	13	14	15	15	14	18	19	19	18	19	18	14	13	14	15	15	14	16	17	17	16	17	16	12	11	12	13	13	13	54.7	54.7
P41241;P41242	P41241	20;1	20;1	20;1	Tyrosine-protein kinase CSK	Csk	sp|P41241|CSK_MOUSE Tyrosine-protein kinase CSK OS=Mus musculus GN=Csk PE=1 SV=2	2	20	20	20	19	18	17	18	18	15	11	9	11	10	12	9	19	18	17	18	18	15	11	9	11	10	12	9	19	18	17	18	18	15	11	9	11	10	12	9	53.6	53.6
P47962	P47962	20	20	20	60S ribosomal protein L5	Rpl5	sp|P47962|RL5_MOUSE 60S ribosomal protein L5 OS=Mus musculus GN=Rpl5 PE=1 SV=3	1	20	20	20	18	18	17	16	17	15	16	14	14	14	13	12	18	18	17	16	17	15	16	14	14	14	13	12	18	18	17	16	17	15	16	14	14	14	13	12	63	63
P49452	P49452	20	20	20	Centromere protein C	Cenpc	sp|P49452|CENPC_MOUSE Centromere protein C OS=Mus musculus GN=Cenpc PE=1 SV=2	1	20	20	20	13	13	7	14	12	9	11	13	11	12	7	11	13	13	7	14	12	9	11	13	11	12	7	11	13	13	7	14	12	9	11	13	11	12	7	11	29.2	29.2
P54823	P54823	20	20	20	Probable ATP-dependent RNA helicase DDX6	Ddx6	sp|P54823|DDX6_MOUSE Probable ATP-dependent RNA helicase DDX6 OS=Mus musculus GN=Ddx6 PE=1 SV=1	1	20	20	20	18	17	16	18	19	18	13	13	11	11	15	13	18	17	16	18	19	18	13	13	11	11	15	13	18	17	16	18	19	18	13	13	11	11	15	13	54	54
P58854	P58854	20	20	20	Gamma-tubulin complex component 3	Tubgcp3	sp|P58854|GCP3_MOUSE Gamma-tubulin complex component 3 OS=Mus musculus GN=Tubgcp3 PE=1 SV=2	1	20	20	20	15	16	10	14	16	14	10	7	7	9	9	12	15	16	10	14	16	14	10	7	7	9	9	12	15	16	10	14	16	14	10	7	7	9	9	12	27.3	27.3
P60229	P60229	20	20	20	Eukaryotic translation initiation factor 3 subunit E	Eif3e	sp|P60229|EIF3E_MOUSE Eukaryotic translation initiation factor 3 subunit E OS=Mus musculus GN=Eif3e PE=1 SV=1	1	20	20	20	15	19	16	13	17	16	12	12	12	9	10	11	15	19	16	13	17	16	12	12	12	9	10	11	15	19	16	13	17	16	12	12	12	9	10	11	49	49
P63085;Q6P5G0;Q61532	P63085	20;1;1	20;1;1	16;0;0	Mitogen-activated protein kinase 1	Mapk1	sp|P63085|MK01_MOUSE Mitogen-activated protein kinase 1 OS=Mus musculus GN=Mapk1 PE=1 SV=3	3	20	20	16	20	18	16	19	19	18	7	6	5	5	7	9	20	18	16	19	19	18	7	6	5	5	7	9	16	15	13	16	15	15	6	6	5	5	7	8	62.8	62.8
P97329	P97329	20	20	20	Kinesin-like protein KIF20A	Kif20a	sp|P97329|KI20A_MOUSE Kinesin-like protein KIF20A OS=Mus musculus GN=Kif20a PE=1 SV=1	1	20	20	20	13	16	18	16	14	15	11	13	14	12	12	12	13	16	18	16	14	15	11	13	14	12	12	12	13	16	18	16	14	15	11	13	14	12	12	12	28.4	28.4
Q02819	Q02819	20	20	20	Nucleobindin-1	Nucb1	sp|Q02819|NUCB1_MOUSE Nucleobindin-1 OS=Mus musculus GN=Nucb1 PE=1 SV=2	1	20	20	20	18	19	20	20	18	17	1	1	4	3	5	3	18	19	20	20	18	17	1	1	4	3	5	3	18	19	20	20	18	17	1	1	4	3	5	3	47.7	47.7
Q05512	Q05512	20	20	17	Serine/threonine-protein kinase MARK2	Mark2	sp|Q05512|MARK2_MOUSE Serine/threonine-protein kinase MARK2 OS=Mus musculus GN=Mark2 PE=1 SV=3	1	20	20	17	14	12	16	15	15	15	12	15	11	7	10	12	14	12	16	15	15	15	12	15	11	7	10	12	12	11	14	12	13	13	11	13	10	6	9	11	36.2	36.2
Q3TEA8	Q3TEA8	20	20	20	Heterochromatin protein 1-binding protein 3	Hp1bp3	sp|Q3TEA8|HP1B3_MOUSE Heterochromatin protein 1-binding protein 3 OS=Mus musculus GN=Hp1bp3 PE=1 SV=1	1	20	20	20	17	17	16	18	17	15	16	14	13	15	13	14	17	17	16	18	17	15	16	14	13	15	13	14	17	17	16	18	17	15	16	14	13	15	13	14	46	46
Q3THS6;Q91X83	Q3THS6	20;2	20;2	20;2	S-adenosylmethionine synthase isoform type-2	Mat2a	sp|Q3THS6|METK2_MOUSE S-adenosylmethionine synthase isoform type-2 OS=Mus musculus GN=Mat2a PE=1 SV=2	2	20	20	20	15	20	15	16	18	16	11	9	9	8	12	10	15	20	15	16	18	16	11	9	9	8	12	10	15	20	15	16	18	16	11	9	9	8	12	10	68.6	68.6
Q3U821	Q3U821	20	20	20		Wdr75	sp|Q3U821|WDR75_MOUSE WD repeat-containing protein 75 OS=Mus musculus GN=Wdr75 PE=1 SV=1	1	20	20	20	14	14	14	13	13	11	10	10	9	10	9	7	14	14	14	13	13	11	10	10	9	10	9	7	14	14	14	13	13	11	10	10	9	10	9	7	28.8	28.8
Q3UEB3	Q3UEB3	20	20	20	Poly(U)-binding-splicing factor PUF60	Puf60	sp|Q3UEB3|PUF60_MOUSE Poly(U)-binding-splicing factor PUF60 OS=Mus musculus GN=Puf60 PE=1 SV=2	1	20	20	20	15	18	16	15	16	15	15	11	10	10	12	13	15	18	16	15	16	15	15	11	10	10	12	13	15	18	16	15	16	15	15	11	10	10	12	13	45.4	45.4
Q3UMY5	Q3UMY5	20	20	20	Echinoderm microtubule-associated protein-like 4	Eml4	sp|Q3UMY5|EMAL4_MOUSE Echinoderm microtubule-associated protein-like 4 OS=Mus musculus GN=Eml4 PE=1 SV=1	1	20	20	20	15	14	10	14	16	17	10	8	9	3	14	11	15	14	10	14	16	17	10	8	9	3	14	11	15	14	10	14	16	17	10	8	9	3	14	11	22.3	22.3
Q3V1V3	Q3V1V3	20	20	20	ESF1 homolog	Esf1	sp|Q3V1V3|ESF1_MOUSE ESF1 homolog OS=Mus musculus GN=Esf1 PE=1 SV=1	1	20	20	20	14	14	15	15	13	14	13	12	8	8	12	13	14	14	15	15	13	14	13	12	8	8	12	13	14	14	15	15	13	14	13	12	8	8	12	13	27.1	27.1
Q501J6	Q501J6	29	20	20	Probable ATP-dependent RNA helicase DDX17	Ddx17	sp|Q501J6|DDX17_MOUSE Probable ATP-dependent RNA helicase DDX17 OS=Mus musculus GN=Ddx17 PE=1 SV=1	1	29	20	20	27	29	27	27	27	28	20	19	18	18	19	21	19	20	19	19	19	19	13	12	10	12	13	14	19	20	19	19	19	19	13	12	10	12	13	14	47.8	34.6
Q505F5	Q505F5	20	20	20	Leucine-rich repeat-containing protein 47	Lrrc47	sp|Q505F5|LRC47_MOUSE Leucine-rich repeat-containing protein 47 OS=Mus musculus GN=Lrrc47 PE=1 SV=1	1	20	20	20	18	18	17	17	18	17	11	8	7	7	11	12	18	18	17	17	18	17	11	8	7	7	11	12	18	18	17	17	18	17	11	8	7	7	11	12	43.4	43.4
Q60932	Q60932	20	20	20	Voltage-dependent anion-selective channel protein 1	Vdac1	sp|Q60932|VDAC1_MOUSE Voltage-dependent anion-selective channel protein 1 OS=Mus musculus GN=Vdac1 PE=1 SV=3	1	20	20	20	16	20	17	16	16	16	11	10	7	7	8	9	16	20	17	16	16	16	11	10	7	7	8	9	16	20	17	16	16	16	11	10	7	7	8	9	68.6	68.6
Q61216	Q61216	20	20	20	Double-strand break repair protein MRE11A	Mre11a	sp|Q61216|MRE11_MOUSE Double-strand break repair protein MRE11 OS=Mus musculus GN=Mre11 PE=1 SV=1	1	20	20	20	15	14	16	15	14	14	14	12	10	10	12	13	15	14	16	15	14	14	14	12	10	10	12	13	15	14	16	15	14	14	14	12	10	10	12	13	33.3	33.3
Q6P1H6	Q6P1H6	20	20	20	Ankyrin repeat and LEM domain-containing protein 2	Ankle2	sp|Q6P1H6|ANKL2_MOUSE Ankyrin repeat and LEM domain-containing protein 2 OS=Mus musculus GN=Ankle2 PE=1 SV=2	1	20	20	20	18	17	14	17	16	14	10	12	7	7	12	11	18	17	14	17	16	14	10	12	7	7	12	11	18	17	14	17	16	14	10	12	7	7	12	11	30.1	30.1
Q6P2B1	Q6P2B1	20	20	19	Transportin-3	Tnpo3	sp|Q6P2B1|TNPO3_MOUSE Transportin-3 OS=Mus musculus GN=Tnpo3 PE=1 SV=1	1	20	20	19	17	18	15	16	14	13	7	7	9	6	7	6	17	18	15	16	14	13	7	7	9	6	7	6	16	17	14	16	14	13	6	6	8	5	6	5	35	35
Q6PDM2	Q6PDM2	20	20	20	Serine/arginine-rich splicing factor 1	Srsf1	sp|Q6PDM2|SRSF1_MOUSE Serine/arginine-rich splicing factor 1 OS=Mus musculus GN=Srsf1 PE=1 SV=3	1	20	20	20	17	19	17	20	16	19	13	13	13	12	12	14	17	19	17	20	16	19	13	13	13	12	12	14	17	19	17	20	16	19	13	13	13	12	12	14	50.4	50.4
Q6ZPJ3	Q6ZPJ3	20	20	20	E2/E3 hybrid ubiquitin-protein ligase UBE2O	Ube2o	sp|Q6ZPJ3|UBE2O_MOUSE (E3-independent) E2 ubiquitin-conjugating enzyme UBE2O OS=Mus musculus GN=Ube2o PE=1 SV=3	1	20	20	20	13	13	12	11	11	12	7	4	2	2	6	7	13	13	12	11	11	12	7	4	2	2	6	7	13	13	12	11	11	12	7	4	2	2	6	7	21.4	21.4
Q6ZQ93	Q6ZQ93	20	20	20	Ubiquitin carboxyl-terminal hydrolase 34	Usp34	sp|Q6ZQ93|UBP34_MOUSE Ubiquitin carboxyl-terminal hydrolase 34 OS=Mus musculus GN=Usp34 PE=1 SV=3	1	20	20	20	13	14	6	12	11	12	4	5	7	7	6	8	13	14	6	12	11	12	4	5	7	7	6	8	13	14	6	12	11	12	4	5	7	7	6	8	6.6	6.6
Q6ZWN5	Q6ZWN5	20	20	20	40S ribosomal protein S9	Rps9	sp|Q6ZWN5|RS9_MOUSE 40S ribosomal protein S9 OS=Mus musculus GN=Rps9 PE=1 SV=3	1	20	20	20	19	19	17	19	20	19	10	11	9	12	12	10	19	19	17	19	20	19	10	11	9	12	12	10	19	19	17	19	20	19	10	11	9	12	12	10	60.8	60.8
Q7TNV0	Q7TNV0	20	20	20	Protein DEK	Dek	sp|Q7TNV0|DEK_MOUSE Protein DEK OS=Mus musculus GN=Dek PE=1 SV=1	1	20	20	20	14	18	15	16	16	14	15	17	13	13	17	17	14	18	15	16	16	14	15	17	13	13	17	17	14	18	15	16	16	14	15	17	13	13	17	17	41.6	41.6
Q80U70	Q80U70	20	20	20	Polycomb protein Suz12	Suz12	sp|Q80U70|SUZ12_MOUSE Polycomb protein Suz12 OS=Mus musculus GN=Suz12 PE=1 SV=2	1	20	20	20	17	17	15	16	15	14	10	9	11	8	9	9	17	17	15	16	15	14	10	9	11	8	9	9	17	17	15	16	15	14	10	9	11	8	9	9	33.2	33.2
Q8BGC0	Q8BGC0	20	20	20	HIV Tat-specific factor 1 homolog	Htatsf1	sp|Q8BGC0|HTSF1_MOUSE HIV Tat-specific factor 1 homolog OS=Mus musculus GN=Htatsf1 PE=1 SV=1	1	20	20	20	15	16	11	18	14	14	2	7	4	1	7	7	15	16	11	18	14	14	2	7	4	1	7	7	15	16	11	18	14	14	2	7	4	1	7	7	34.3	34.3
Q8BHB4	Q8BHB4	20	20	20	WD repeat-containing protein 3	Wdr3	sp|Q8BHB4|WDR3_MOUSE WD repeat-containing protein 3 OS=Mus musculus GN=Wdr3 PE=1 SV=1	1	20	20	20	15	15	15	15	11	8	9	6	7	9	11	8	15	15	15	15	11	8	9	6	7	9	11	8	15	15	15	15	11	8	9	6	7	9	11	8	26	26
Q8BHD7	Q8BHD7	20	20	17	Polypyrimidine tract-binding protein 3	Ptbp3	sp|Q8BHD7|PTBP3_MOUSE Polypyrimidine tract-binding protein 3 OS=Mus musculus GN=Ptbp3 PE=1 SV=1	1	20	20	17	17	17	15	15	18	16	11	9	8	8	12	10	17	17	15	15	18	16	11	9	8	8	12	10	15	14	14	13	17	16	11	8	7	8	11	9	62	62
Q8BLN5	Q8BLN5	20	20	20	Lanosterol synthase	Lss	sp|Q8BLN5|ERG7_MOUSE Lanosterol synthase OS=Mus musculus GN=Lss PE=1 SV=2	1	20	20	20	15	14	13	14	17	17	4	3	4	4	5	8	15	14	13	14	17	17	4	3	4	4	5	8	15	14	13	14	17	17	4	3	4	4	5	8	34.9	34.9
Q8BYW1	Q8BYW1	20	20	20	Rho GTPase-activating protein 25	Arhgap25	sp|Q8BYW1|RHG25_MOUSE Rho GTPase-activating protein 25 OS=Mus musculus GN=Arhgap25 PE=1 SV=2	1	20	20	20	17	18	15	17	16	14	2	4	1	3	5	5	17	18	15	17	16	14	2	4	1	3	5	5	17	18	15	17	16	14	2	4	1	3	5	5	42.3	42.3
Q8CJG0	Q8CJG0	20	20	16	Protein argonaute-2	Ago2	sp|Q8CJG0|AGO2_MOUSE Protein argonaute-2 OS=Mus musculus GN=Ago2 PE=1 SV=3	1	20	20	16	17	20	16	18	18	16	5	5	6	7	10	9	17	20	16	18	18	16	5	5	6	7	10	9	13	16	12	14	14	13	4	4	3	4	7	7	27.7	27.7
Q8R016	Q8R016	20	20	20	Bleomycin hydrolase	Blmh	sp|Q8R016|BLMH_MOUSE Bleomycin hydrolase OS=Mus musculus GN=Blmh PE=1 SV=1	1	20	20	20	17	17	17	18	16	14	6	5	7	3	2	0	17	17	17	18	16	14	6	5	7	3	2	0	17	17	17	18	16	14	6	5	7	3	2	0	49.7	49.7
Q8R080	Q8R080	20	20	20	G2 and S phase-expressed protein 1	Gtse1	sp|Q8R080|GTSE1_MOUSE G2 and S phase-expressed protein 1 OS=Mus musculus GN=Gtse1 PE=1 SV=2	1	20	20	20	13	15	16	15	17	17	15	12	13	13	14	9	13	15	16	15	17	17	15	12	13	13	14	9	13	15	16	15	17	17	15	12	13	13	14	9	34.5	34.5
Q8R2M2	Q8R2M2	20	20	20	Deoxynucleotidyltransferase terminal-interacting protein 2	Dnttip2	sp|Q8R2M2|TDIF2_MOUSE Deoxynucleotidyltransferase terminal-interacting protein 2 OS=Mus musculus GN=Dnttip2 PE=1 SV=1	1	20	20	20	15	14	13	14	10	9	12	12	10	9	12	12	15	14	13	14	10	9	12	12	10	9	12	12	15	14	13	14	10	9	12	12	10	9	12	12	40.5	40.5
Q8R3C0	Q8R3C0	20	20	20	Mini-chromosome maintenance complex-binding protein	Mcmbp	sp|Q8R3C0|MCMBP_MOUSE Mini-chromosome maintenance complex-binding protein OS=Mus musculus GN=Mcmbp PE=1 SV=1	1	20	20	20	16	16	14	18	18	19	7	7	5	5	8	8	16	16	14	18	18	19	7	7	5	5	8	8	16	16	14	18	18	19	7	7	5	5	8	8	38	38
Q8VHR5	Q8VHR5	21	20	20	Transcriptional repressor p66-beta	Gatad2b	sp|Q8VHR5|P66B_MOUSE Transcriptional repressor p66-beta OS=Mus musculus GN=Gatad2b PE=1 SV=1	1	21	20	20	19	20	17	18	16	17	16	13	13	10	11	14	18	19	16	17	15	16	15	13	13	9	11	14	18	19	16	17	15	16	15	13	13	9	11	14	43.4	41.8
Q91YK2	Q91YK2	20	20	20	Ribosomal RNA processing protein 1 homolog B	Rrp1b	sp|Q91YK2|RRP1B_MOUSE Ribosomal RNA processing protein 1 homolog B OS=Mus musculus GN=Rrp1b PE=1 SV=2	1	20	20	20	12	12	11	11	10	9	10	12	13	11	10	12	12	12	11	11	10	9	10	12	13	11	10	12	12	12	11	11	10	9	10	12	13	11	10	12	35.8	35.8
Q922K7	Q922K7	20	20	20	Probable 28S rRNA (cytosine-C(5))-methyltransferase	Nop2	sp|Q922K7|NOP2_MOUSE Probable 28S rRNA (cytosine-C(5))-methyltransferase OS=Mus musculus GN=Nop2 PE=1 SV=1	1	20	20	20	17	17	17	17	18	17	17	17	12	13	15	15	17	17	17	17	18	17	17	17	12	13	15	15	17	17	17	17	18	17	17	17	12	13	15	15	35.3	35.3
Q922U1	Q922U1	20	20	20	U4/U6 small nuclear ribonucleoprotein Prp3	Prpf3	sp|Q922U1|PRPF3_MOUSE U4/U6 small nuclear ribonucleoprotein Prp3 OS=Mus musculus GN=Prpf3 PE=1 SV=1	1	20	20	20	19	19	16	18	17	16	10	10	11	7	13	9	19	19	16	18	17	16	10	10	11	7	13	9	19	19	16	18	17	16	10	10	11	7	13	9	39.1	39.1
Q924W5	Q924W5	20	20	20	Structural maintenance of chromosomes protein 6	Smc6	sp|Q924W5|SMC6_MOUSE Structural maintenance of chromosomes protein 6 OS=Mus musculus GN=Smc6 PE=1 SV=1	1	20	20	20	13	18	12	17	15	15	8	10	9	9	12	10	13	18	12	17	15	15	8	10	9	9	12	10	13	18	12	17	15	15	8	10	9	9	12	10	22.7	22.7
Q99JT2	Q99JT2	20	20	10	Serine/threonine-protein kinase 26	Stk26	sp|Q99JT2|STK26_MOUSE Serine/threonine-protein kinase 26 OS=Mus musculus GN=Stk26 PE=1 SV=1	1	20	20	10	19	17	16	15	20	20	11	10	8	8	12	10	19	17	16	15	20	20	11	10	8	8	12	10	10	8	7	7	10	10	6	6	5	4	7	6	50	50
Q99KY4	Q99KY4	20	20	19	Cyclin-G-associated kinase	Gak	sp|Q99KY4|GAK_MOUSE Cyclin-G-associated kinase OS=Mus musculus GN=Gak PE=1 SV=2	1	20	20	19	15	18	13	15	15	14	6	11	8	7	10	8	15	18	13	15	15	14	6	11	8	7	10	8	14	17	12	14	14	13	6	10	8	7	9	7	17	17
Q99MD6	Q99MD6	20	20	20	Thioredoxin reductase 3	Txnrd3	sp|Q99MD6|TRXR3_MOUSE Thioredoxin reductase 3 OS=Mus musculus GN=Txnrd3 PE=1 SV=3	1	20	20	20	19	19	16	20	16	16	6	4	3	3	4	5	19	19	16	20	16	16	6	4	3	3	4	5	19	19	16	20	16	16	6	4	3	3	4	5	42.6	42.6
Q9CRC8	Q9CRC8	20	20	20	Leucine-rich repeat-containing protein 40	Lrrc40	sp|Q9CRC8|LRC40_MOUSE Leucine-rich repeat-containing protein 40 OS=Mus musculus GN=Lrrc40 PE=1 SV=2	1	20	20	20	17	18	18	14	17	19	9	8	11	6	10	10	17	18	18	14	17	19	9	8	11	6	10	10	17	18	18	14	17	19	9	8	11	6	10	10	46.7	46.7
Q9CYG7	Q9CYG7	20	20	20	Mitochondrial import receptor subunit TOM34	Tomm34	sp|Q9CYG7|TOM34_MOUSE Mitochondrial import receptor subunit TOM34 OS=Mus musculus GN=Tomm34 PE=1 SV=1	1	20	20	20	18	18	16	19	18	17	12	9	9	9	13	11	18	18	16	19	18	17	12	9	9	9	13	11	18	18	16	19	18	17	12	9	9	9	13	11	68.9	68.9
Q9D1A2	Q9D1A2	20	20	20	Cytosolic non-specific dipeptidase	Cndp2	sp|Q9D1A2|CNDP2_MOUSE Cytosolic non-specific dipeptidase OS=Mus musculus GN=Cndp2 PE=1 SV=1	1	20	20	20	18	16	17	18	18	18	7	7	2	6	12	8	18	16	17	18	18	18	7	7	2	6	12	8	18	16	17	18	18	18	7	7	2	6	12	8	59.8	59.8
Q9EPE9	Q9EPE9	20	20	20	Manganese-transporting ATPase 13A1	Atp13a1	sp|Q9EPE9|AT131_MOUSE Manganese-transporting ATPase 13A1 OS=Mus musculus GN=Atp13a1 PE=1 SV=2	1	20	20	20	16	13	12	11	11	9	9	9	8	6	9	10	16	13	12	11	11	9	9	9	8	6	9	10	16	13	12	11	11	9	9	9	8	6	9	10	22.9	22.9
Q9ERH4	Q9ERH4	20	20	20	Nucleolar and spindle-associated protein 1	Nusap1	sp|Q9ERH4|NUSAP_MOUSE Nucleolar and spindle-associated protein 1 OS=Mus musculus GN=Nusap1 PE=1 SV=1	1	20	20	20	19	20	13	16	19	17	12	9	8	9	10	12	19	20	13	16	19	17	12	9	8	9	10	12	19	20	13	16	19	17	12	9	8	9	10	12	52.2	52.2
Q9JLJ2	Q9JLJ2	20	20	20	4-trimethylaminobutyraldehyde dehydrogenase	Aldh9a1	sp|Q9JLJ2|AL9A1_MOUSE 4-trimethylaminobutyraldehyde dehydrogenase OS=Mus musculus GN=Aldh9a1 PE=1 SV=1	1	20	20	20	16	16	14	13	20	19	6	7	7	5	11	10	16	16	14	13	20	19	6	7	7	5	11	10	16	16	14	13	20	19	6	7	7	5	11	10	47.6	47.6
Q9QYB1;Q8BHB9	Q9QYB1	20;1	20;1	19;0	Chloride intracellular channel protein 4	Clic4	sp|Q9QYB1|CLIC4_MOUSE Chloride intracellular channel protein 4 OS=Mus musculus GN=Clic4 PE=1 SV=3	2	20	20	19	19	20	20	18	20	19	13	12	13	9	15	15	19	20	20	18	20	19	13	12	13	9	15	15	18	19	19	17	19	18	12	12	12	9	14	14	81	81
Q9QZK7	Q9QZK7	20	20	20	Docking protein 3	Dok3	sp|Q9QZK7|DOK3_MOUSE Docking protein 3 OS=Mus musculus GN=Dok3 PE=1 SV=1	1	20	20	20	12	16	15	17	12	15	12	11	10	9	10	10	12	16	15	17	12	15	12	11	10	9	10	10	12	16	15	17	12	15	12	11	10	9	10	10	63.1	63.1
Q9WUK4	Q9WUK4	20	20	20	Replication factor C subunit 2	Rfc2	sp|Q9WUK4|RFC2_MOUSE Replication factor C subunit 2 OS=Mus musculus GN=Rfc2 PE=1 SV=1	1	20	20	20	17	18	18	18	17	17	17	16	15	9	16	16	17	18	18	18	17	17	17	16	15	9	16	16	17	18	18	18	17	17	17	16	15	9	16	16	69.6	69.6
Q9Z108	Q9Z108	20	20	20	Double-stranded RNA-binding protein Staufen homolog 1	Stau1	sp|Q9Z108|STAU1_MOUSE Double-stranded RNA-binding protein Staufen homolog 1 OS=Mus musculus GN=Stau1 PE=1 SV=1	1	20	20	20	15	16	12	15	14	12	8	7	7	6	10	7	15	16	12	15	14	12	8	7	7	6	10	7	15	16	12	15	14	12	8	7	7	6	10	7	47.6	47.6
Q9Z1D1	Q9Z1D1	20	20	20	Eukaryotic translation initiation factor 3 subunit G	Eif3g	sp|Q9Z1D1|EIF3G_MOUSE Eukaryotic translation initiation factor 3 subunit G OS=Mus musculus GN=Eif3g PE=1 SV=2	1	20	20	20	14	18	14	15	15	15	14	12	12	10	11	13	14	18	14	15	15	15	14	12	12	10	11	13	14	18	14	15	15	15	14	12	12	10	11	13	69.4	69.4
Q9Z1M8	Q9Z1M8	20	20	20	Protein Red	Ik	sp|Q9Z1M8|RED_MOUSE Protein Red OS=Mus musculus GN=Ik PE=1 SV=2	1	20	20	20	19	16	14	18	19	15	12	7	3	7	10	10	19	16	14	18	19	15	12	7	3	7	10	10	19	16	14	18	19	15	12	7	3	7	10	10	38.2	38.2
Q9Z1Z2	Q9Z1Z2	20	20	20	Serine-threonine kinase receptor-associated protein	Strap	sp|Q9Z1Z2|STRAP_MOUSE Serine-threonine kinase receptor-associated protein OS=Mus musculus GN=Strap PE=1 SV=2	1	20	20	20	19	19	17	17	18	16	11	11	8	8	12	14	19	19	17	17	18	16	11	11	8	8	12	14	19	19	17	17	18	16	11	11	8	8	12	14	63.1	63.1
O08709	O08709	19	19	19	Peroxiredoxin-6	Prdx6	sp|O08709|PRDX6_MOUSE Peroxiredoxin-6 OS=Mus musculus GN=Prdx6 PE=1 SV=3	1	19	19	19	17	17	17	19	18	18	10	8	10	9	11	11	17	17	17	19	18	18	10	8	10	9	11	11	17	17	17	19	18	18	10	8	10	9	11	11	81.2	81.2
O35134	O35134	19	19	19	DNA-directed RNA polymerase I subunit RPA1	Polr1a	sp|O35134|RPA1_MOUSE DNA-directed RNA polymerase I subunit RPA1 OS=Mus musculus GN=Polr1a PE=1 SV=2	1	19	19	19	11	15	14	12	11	11	5	10	8	4	8	4	11	15	14	12	11	11	5	10	8	4	8	4	11	15	14	12	11	11	5	10	8	4	8	4	16.6	16.6
O35638	O35638	19	19	16	Cohesin subunit SA-2	Stag2	sp|O35638|STAG2_MOUSE Cohesin subunit SA-2 OS=Mus musculus GN=Stag2 PE=1 SV=3	1	19	19	16	14	15	14	15	13	15	8	7	8	5	7	7	14	15	14	15	13	15	8	7	8	5	7	7	11	12	11	13	10	12	7	6	7	4	6	6	19.4	19.4
P08249	P08249	19	19	19	Malate dehydrogenase, mitochondrial	Mdh2	sp|P08249|MDHM_MOUSE Malate dehydrogenase, mitochondrial OS=Mus musculus GN=Mdh2 PE=1 SV=3	1	19	19	19	19	19	18	18	19	19	8	6	8	9	10	7	19	19	18	18	19	19	8	6	8	9	10	7	19	19	18	18	19	19	8	6	8	9	10	7	65.1	65.1
P11157	P11157	19	19	18	Ribonucleoside-diphosphate reductase subunit M2	Rrm2	sp|P11157|RIR2_MOUSE Ribonucleoside-diphosphate reductase subunit M2 OS=Mus musculus GN=Rrm2 PE=1 SV=1	1	19	19	18	16	16	18	15	16	16	6	7	6	5	4	6	16	16	18	15	16	16	6	7	6	5	4	6	15	15	17	14	15	15	5	6	6	5	4	6	55.1	55.1
P14206	P14206	19	19	19	40S ribosomal protein SA	Rpsa	sp|P14206|RSSA_MOUSE 40S ribosomal protein SA OS=Mus musculus GN=Rpsa PE=1 SV=4	1	19	19	19	17	17	15	16	19	17	12	13	12	10	13	11	17	17	15	16	19	17	12	13	12	10	13	11	17	17	15	16	19	17	12	13	12	10	13	11	63.7	63.7
P14576	P14576	19	19	19	Signal recognition particle 54 kDa protein	Srp54	sp|P14576|SRP54_MOUSE Signal recognition particle 54 kDa protein OS=Mus musculus GN=Srp54 PE=1 SV=2	1	19	19	19	14	16	13	17	10	9	10	10	6	6	9	4	14	16	13	17	10	9	10	10	6	6	9	4	14	16	13	17	10	9	10	10	6	6	9	4	45.4	45.4
P16330	P16330	19	19	19	2,3-cyclic-nucleotide 3-phosphodiesterase	Cnp	sp|P16330|CN37_MOUSE 2,3-cyclic-nucleotide 3-phosphodiesterase OS=Mus musculus GN=Cnp PE=1 SV=3	1	19	19	19	16	16	16	15	18	17	11	9	6	8	13	12	16	16	16	15	18	17	11	9	6	8	13	12	16	16	16	15	18	17	11	9	6	8	13	12	44.5	44.5
P26043	P26043	34	19	19	Radixin	Rdx	sp|P26043|RADI_MOUSE Radixin OS=Mus musculus GN=Rdx PE=1 SV=3	1	34	19	19	32	31	25	29	31	29	5	5	4	4	7	7	17	17	12	17	17	16	2	1	1	0	2	3	17	17	12	17	17	16	2	1	1	0	2	3	48.2	28.8
P26369	P26369	19	19	19	Splicing factor U2AF 65 kDa subunit	U2af2	sp|P26369|U2AF2_MOUSE Splicing factor U2AF 65 kDa subunit OS=Mus musculus GN=U2af2 PE=1 SV=3	1	19	19	19	17	17	13	16	16	16	12	12	11	9	12	12	17	17	13	16	16	16	12	12	11	9	12	12	17	17	13	16	16	16	12	12	11	9	12	12	60.4	60.4
P35235	P35235	19	19	19	Tyrosine-protein phosphatase non-receptor type 11	Ptpn11	sp|P35235|PTN11_MOUSE Tyrosine-protein phosphatase non-receptor type 11 OS=Mus musculus GN=Ptpn11 PE=1 SV=2	1	19	19	19	15	14	16	15	13	15	4	6	2	2	6	5	15	14	16	15	13	15	4	6	2	2	6	5	15	14	16	15	13	15	4	6	2	2	6	5	41	41
P35700	P35700	19	19	17	Peroxiredoxin-1	Prdx1	sp|P35700|PRDX1_MOUSE Peroxiredoxin-1 OS=Mus musculus GN=Prdx1 PE=1 SV=1	1	19	19	17	17	17	16	18	18	17	11	10	10	7	9	11	17	17	16	18	18	17	11	10	10	7	9	11	15	15	14	16	16	15	10	9	9	6	8	10	75.9	75.9
P37040	P37040	19	19	19	NADPH--cytochrome P450 reductase	Por	sp|P37040|NCPR_MOUSE NADPH--cytochrome P450 reductase OS=Mus musculus GN=Por PE=1 SV=2	1	19	19	19	15	16	14	15	14	16	4	3	2	3	6	3	15	16	14	15	14	16	4	3	2	3	6	3	15	16	14	15	14	16	4	3	2	3	6	3	33.9	33.9
P42225	P42225	19	19	19	Signal transducer and activator of transcription 1	Stat1	sp|P42225|STAT1_MOUSE Signal transducer and activator of transcription 1 OS=Mus musculus GN=Stat1 PE=1 SV=1	1	19	19	19	17	15	16	16	18	14	7	12	10	7	4	11	17	15	16	16	18	14	7	12	10	7	4	11	17	15	16	16	18	14	7	12	10	7	4	11	32.8	32.8
P42227	P42227	19	19	19	Signal transducer and activator of transcription 3	Stat3	sp|P42227|STAT3_MOUSE Signal transducer and activator of transcription 3 OS=Mus musculus GN=Stat3 PE=1 SV=2	1	19	19	19	13	9	11	14	14	13	6	4	4	5	9	7	13	9	11	14	14	13	6	4	4	5	9	7	13	9	11	14	14	13	6	4	4	5	9	7	37.9	37.9
P45481	P45481	19	19	11	CREB-binding protein	Crebbp	sp|P45481|CBP_MOUSE CREB-binding protein OS=Mus musculus GN=Crebbp PE=1 SV=3	1	19	19	11	11	14	9	10	14	14	5	3	2	2	6	7	11	14	9	10	14	14	5	3	2	2	6	7	4	8	4	5	6	6	3	0	1	1	2	3	10.2	10.2
P58501	P58501	19	19	19	PAX3- and PAX7-binding protein 1	Paxbp1	sp|P58501|PAXB1_MOUSE PAX3- and PAX7-binding protein 1 OS=Mus musculus GN=Paxbp1 PE=1 SV=3	1	19	19	19	14	15	11	14	11	13	11	8	6	6	6	6	14	15	11	14	11	13	11	8	6	6	6	6	14	15	11	14	11	13	11	8	6	6	6	6	24.5	24.5
P60335;P57724	P60335	19;2	19;2	13;0	Poly(rC)-binding protein 1	Pcbp1	sp|P60335|PCBP1_MOUSE Poly(rC)-binding protein 1 OS=Mus musculus GN=Pcbp1 PE=1 SV=1	2	19	19	13	19	19	17	18	18	18	14	15	15	10	14	16	19	19	17	18	18	18	14	15	15	10	14	16	13	13	13	12	13	13	11	10	11	7	11	12	82.6	82.6
P61406	P61406	19	19	19	Telomerase-binding protein EST1A	Smg6	sp|P61406|EST1A_MOUSE Telomerase-binding protein EST1A OS=Mus musculus GN=Smg6 PE=1 SV=1	1	19	19	19	16	13	9	12	14	9	5	7	7	7	9	7	16	13	9	12	14	9	5	7	7	7	9	7	16	13	9	12	14	9	5	7	7	7	9	7	16.6	16.6
P62806	P62806	19	19	19	Histone H4	Hist1h4a	sp|P62806|H4_MOUSE Histone H4 OS=Mus musculus GN=Hist1h4a PE=1 SV=2	1	19	19	19	19	18	18	19	19	19	13	13	12	11	13	12	19	18	18	19	19	19	13	13	12	11	13	12	19	18	18	19	19	19	13	13	12	11	13	12	68.9	68.9
P70460	P70460	19	19	19	Vasodilator-stimulated phosphoprotein	Vasp	sp|P70460|VASP_MOUSE Vasodilator-stimulated phosphoprotein OS=Mus musculus GN=Vasp PE=1 SV=4	1	19	19	19	17	18	16	17	18	17	10	12	10	10	11	12	17	18	16	17	18	17	10	12	10	10	11	12	17	18	16	17	18	17	10	12	10	10	11	12	50.9	50.9
Q14C51	Q14C51	19	19	19	Pentatricopeptide repeat domain-containing protein 3, mitochondrial	Ptcd3	sp|Q14C51|PTCD3_MOUSE Pentatricopeptide repeat domain-containing protein 3, mitochondrial OS=Mus musculus GN=Ptcd3 PE=1 SV=2	1	19	19	19	16	14	14	16	14	12	4	1	3	0	1	1	16	14	14	16	14	12	4	1	3	0	1	1	16	14	14	16	14	12	4	1	3	0	1	1	37.1	37.1
Q2EMV9	Q2EMV9	19	19	19	Poly [ADP-ribose] polymerase 14	Parp14	sp|Q2EMV9|PAR14_MOUSE Poly [ADP-ribose] polymerase 14 OS=Mus musculus GN=Parp14 PE=1 SV=3	1	19	19	19	11	14	14	10	14	14	9	5	4	7	8	6	11	14	14	10	14	14	9	5	4	7	8	6	11	14	14	10	14	14	9	5	4	7	8	6	13.6	13.6
Q3B7Z2	Q3B7Z2	19	19	19	Oxysterol-binding protein 1	Osbp	sp|Q3B7Z2|OSBP1_MOUSE Oxysterol-binding protein 1 OS=Mus musculus GN=Osbp PE=1 SV=3	1	19	19	19	15	17	13	12	14	15	6	5	4	1	8	10	15	17	13	12	14	15	6	5	4	1	8	10	15	17	13	12	14	15	6	5	4	1	8	10	29.9	29.9
Q3TDD9	Q3TDD9	19	19	19	Protein phosphatase 1 regulatory subunit 21	Ppp1r21	sp|Q3TDD9|PPR21_MOUSE Protein phosphatase 1 regulatory subunit 21 OS=Mus musculus GN=Ppp1r21 PE=1 SV=2	1	19	19	19	15	16	10	14	15	16	2	3	4	2	6	6	15	16	10	14	15	16	2	3	4	2	6	6	15	16	10	14	15	16	2	3	4	2	6	6	31.9	31.9
Q3TIX9	Q3TIX9	19	19	19	U4/U6.U5 tri-snRNP-associated protein 2	Usp39	sp|Q3TIX9|SNUT2_MOUSE U4/U6.U5 tri-snRNP-associated protein 2 OS=Mus musculus GN=Usp39 PE=1 SV=2	1	19	19	19	17	15	12	14	17	17	8	7	6	5	8	9	17	15	12	14	17	17	8	7	6	5	8	9	17	15	12	14	17	17	8	7	6	5	8	9	38.7	38.7
Q3UHX0	Q3UHX0	19	19	19	Nucleolar protein 8	Nol8	sp|Q3UHX0|NOL8_MOUSE Nucleolar protein 8 OS=Mus musculus GN=Nol8 PE=1 SV=2	1	19	19	19	9	10	12	14	9	11	8	8	8	6	5	9	9	10	12	14	9	11	8	8	8	6	5	9	9	10	12	14	9	11	8	8	8	6	5	9	19.8	19.8
Q4LDD4	Q4LDD4	19	19	19	Arf-GAP with Rho-GAP domain, ANK repeat and PH domain-containing protein 1	Arap1	sp|Q4LDD4|ARAP1_MOUSE Arf-GAP with Rho-GAP domain, ANK repeat and PH domain-containing protein 1 OS=Mus musculus GN=Arap1 PE=1 SV=2	1	19	19	19	14	15	13	14	12	12	7	3	6	5	6	3	14	15	13	14	12	12	7	3	6	5	6	3	14	15	13	14	12	12	7	3	6	5	6	3	16	16
Q5SSW2	Q5SSW2	19	19	19	Proteasome activator complex subunit 4	Psme4	sp|Q5SSW2|PSME4_MOUSE Proteasome activator complex subunit 4 OS=Mus musculus GN=Psme4 PE=1 SV=1	1	19	19	19	14	15	11	14	15	16	1	3	1	1	5	6	14	15	11	14	15	16	1	3	1	1	5	6	14	15	11	14	15	16	1	3	1	1	5	6	12.9	12.9
Q5SUF2	Q5SUF2	19	19	19	Luc7-like protein 3	Luc7l3	sp|Q5SUF2|LC7L3_MOUSE Luc7-like protein 3 OS=Mus musculus GN=Luc7l3 PE=1 SV=1	1	19	19	19	13	13	12	15	14	14	9	9	7	10	9	10	13	13	12	15	14	14	9	9	7	10	9	10	13	13	12	15	14	14	9	9	7	10	9	10	36.3	36.3
Q60865	Q60865	19	19	19	Caprin-1	Caprin1	sp|Q60865|CAPR1_MOUSE Caprin-1 OS=Mus musculus GN=Caprin1 PE=1 SV=2	1	19	19	19	19	18	14	18	18	18	10	10	11	7	11	12	19	18	14	18	18	18	10	10	11	7	11	12	19	18	14	18	18	18	10	10	11	7	11	12	31.5	31.5
Q64287	Q64287	19	19	19	Interferon regulatory factor 4	Irf4	sp|Q64287|IRF4_MOUSE Interferon regulatory factor 4 OS=Mus musculus GN=Irf4 PE=1 SV=1	1	19	19	19	14	15	16	16	15	16	6	8	4	6	7	8	14	15	16	16	15	16	6	8	4	6	7	8	14	15	16	16	15	16	6	8	4	6	7	8	61.1	61.1
Q6NZC7	Q6NZC7	19	19	19	SEC23-interacting protein	Sec23ip	sp|Q6NZC7|S23IP_MOUSE SEC23-interacting protein OS=Mus musculus GN=Sec23ip PE=1 SV=2	1	19	19	19	18	15	12	12	17	15	5	6	3	2	6	3	18	15	12	12	17	15	5	6	3	2	6	3	18	15	12	12	17	15	5	6	3	2	6	3	25.3	25.3
Q6NZN0	Q6NZN0	20	19	19	RNA-binding protein 26	Rbm26	sp|Q6NZN0|RBM26_MOUSE RNA-binding protein 26 OS=Mus musculus GN=Rbm26 PE=1 SV=2	1	20	19	19	16	19	12	15	17	15	10	7	6	4	5	8	15	18	11	14	16	14	9	6	5	3	4	7	15	18	11	14	16	14	9	6	5	3	4	7	20	18.8
Q6P1B1	Q6P1B1	19	19	18	Xaa-Pro aminopeptidase 1	Xpnpep1	sp|Q6P1B1|XPP1_MOUSE Xaa-Pro aminopeptidase 1 OS=Mus musculus GN=Xpnpep1 PE=1 SV=1	1	19	19	18	14	14	15	11	15	17	8	7	7	3	9	7	14	14	15	11	15	17	8	7	7	3	9	7	13	13	15	11	15	16	8	7	7	3	9	7	42.2	42.2
Q6P9Q6	Q6P9Q6	19	19	19	FK506-binding protein 15	Fkbp15	sp|Q6P9Q6|FKB15_MOUSE FK506-binding protein 15 OS=Mus musculus GN=Fkbp15 PE=1 SV=2	1	19	19	19	16	16	14	16	14	16	8	9	6	8	7	6	16	16	14	16	14	16	8	9	6	8	7	6	16	16	14	16	14	16	8	9	6	8	7	6	24.6	24.6
Q6PA06	Q6PA06	19	19	18	Atlastin-2	Atl2	sp|Q6PA06|ATLA2_MOUSE Atlastin-2 OS=Mus musculus GN=Atl2 PE=1 SV=1	1	19	19	18	15	16	14	16	15	14	10	9	7	6	12	8	15	16	14	16	15	14	10	9	7	6	12	8	15	15	14	15	14	13	9	8	7	5	11	8	36.4	36.4
Q6PAM1	Q6PAM1	19	19	19	Alpha-taxilin	Txlna	sp|Q6PAM1|TXLNA_MOUSE Alpha-taxilin OS=Mus musculus GN=Txlna PE=1 SV=1	1	19	19	19	16	18	13	17	14	15	6	4	2	2	3	5	16	18	13	17	14	15	6	4	2	2	3	5	16	18	13	17	14	15	6	4	2	2	3	5	39.9	39.9
Q6PGG2	Q6PGG2	19	19	19	GEM-interacting protein	Gmip	sp|Q6PGG2|GMIP_MOUSE GEM-interacting protein OS=Mus musculus GN=Gmip PE=1 SV=1	1	19	19	19	16	16	12	15	17	15	8	9	3	4	8	10	16	16	12	15	17	15	8	9	3	4	8	10	16	16	12	15	17	15	8	9	3	4	8	10	25.2	25.2
Q6ZQB6	Q6ZQB6	19	19	17	Inositol hexakisphosphate and diphosphoinositol-pentakisphosphate kinase 2	Ppip5k2	sp|Q6ZQB6|VIP2_MOUSE Inositol hexakisphosphate and diphosphoinositol-pentakisphosphate kinase 2 OS=Mus musculus GN=Ppip5k2 PE=1 SV=3	1	19	19	17	13	14	15	16	14	13	10	8	8	4	10	7	13	14	15	16	14	13	10	8	8	4	10	7	13	12	14	15	13	13	10	7	7	3	9	7	21.1	21.1
Q6ZWX6	Q6ZWX6	19	19	19	Eukaryotic translation initiation factor 2 subunit 1	Eif2s1	sp|Q6ZWX6|IF2A_MOUSE Eukaryotic translation initiation factor 2 subunit 1 OS=Mus musculus GN=Eif2s1 PE=1 SV=3	1	19	19	19	16	18	17	19	18	18	8	11	9	10	9	10	16	18	17	19	18	18	8	11	9	10	9	10	16	18	17	19	18	18	8	11	9	10	9	10	61.3	61.3
Q7TME2	Q7TME2	19	19	19	Sperm-associated antigen 5	Spag5	sp|Q7TME2|SPAG5_MOUSE Sperm-associated antigen 5 OS=Mus musculus GN=Spag5 PE=1 SV=1	1	19	19	19	15	12	8	14	11	11	5	5	5	7	4	3	15	12	8	14	11	11	5	5	5	7	4	3	15	12	8	14	11	11	5	5	5	7	4	3	19.4	19.4
Q80UJ7	Q80UJ7	19	19	19	Rab3 GTPase-activating protein catalytic subunit	Rab3gap1	sp|Q80UJ7|RB3GP_MOUSE Rab3 GTPase-activating protein catalytic subunit OS=Mus musculus GN=Rab3gap1 PE=1 SV=4	1	19	19	19	17	17	14	15	13	11	6	5	5	5	6	8	17	17	14	15	13	11	6	5	5	5	6	8	17	17	14	15	13	11	6	5	5	5	6	8	25.4	25.4
Q80WQ8	Q80WQ8	19	19	19	Mis18-binding protein 1	Mis18bp1	sp|Q80WQ8|M18BP_MOUSE Mis18-binding protein 1 OS=Mus musculus GN=Mis18bp1 PE=1 SV=1	1	19	19	19	12	13	12	13	9	11	12	10	8	5	9	8	12	13	12	13	9	11	12	10	8	5	9	8	12	13	12	13	9	11	12	10	8	5	9	8	23.8	23.8
Q80XU3	Q80XU3	19	19	19	Nuclear ubiquitous casein and cyclin-dependent kinase substrate 1	Nucks1	sp|Q80XU3|NUCKS_MOUSE Nuclear ubiquitous casein and cyclin-dependent kinase substrate 1 OS=Mus musculus GN=Nucks1 PE=1 SV=1	1	19	19	19	18	17	12	16	16	16	10	10	10	6	10	8	18	17	12	16	16	16	10	10	10	6	10	8	18	17	12	16	16	16	10	10	10	6	10	8	57.3	57.3
Q810A7	Q810A7	19	19	19	ATP-dependent RNA helicase DDX42	Ddx42	sp|Q810A7|DDX42_MOUSE ATP-dependent RNA helicase DDX42 OS=Mus musculus GN=Ddx42 PE=1 SV=3	1	19	19	19	17	18	14	18	16	13	9	8	8	7	7	9	17	18	14	18	16	13	9	8	8	7	7	9	17	18	14	18	16	13	9	8	8	7	7	9	27.6	27.6
Q8BL48;Q5FWH2	Q8BL48	19;1	19;1	19;1	RING finger protein unkempt homolog	Unk	sp|Q8BL48|UNK_MOUSE RING finger protein unkempt homolog OS=Mus musculus GN=Unk PE=1 SV=1	2	19	19	19	15	15	13	14	17	16	4	3	2	2	6	5	15	15	13	14	17	16	4	3	2	2	6	5	15	15	13	14	17	16	4	3	2	2	6	5	31.9	31.9
Q8BRF7	Q8BRF7	19	19	19	Sec1 family domain-containing protein 1	Scfd1	sp|Q8BRF7|SCFD1_MOUSE Sec1 family domain-containing protein 1 OS=Mus musculus GN=Scfd1 PE=1 SV=1	1	19	19	19	16	16	12	12	16	16	9	8	7	7	11	8	16	16	12	12	16	16	9	8	7	7	11	8	16	16	12	12	16	16	9	8	7	7	11	8	41.5	41.5
Q8BVL9;Q5DTN8	Q8BVL9	19;1	19;1	19;1	Janus kinase and microtubule-interacting protein 1	Jakmip1	sp|Q8BVL9|JKIP1_MOUSE Janus kinase and microtubule-interacting protein 1 OS=Mus musculus GN=Jakmip1 PE=1 SV=2	2	19	19	19	13	13	15	13	12	13	11	9	6	8	8	10	13	13	15	13	12	13	11	9	6	8	8	10	13	13	15	13	12	13	11	9	6	8	8	10	29.4	29.4
Q8BY87	Q8BY87	19	19	19	Ubiquitin carboxyl-terminal hydrolase 47	Usp47	sp|Q8BY87|UBP47_MOUSE Ubiquitin carboxyl-terminal hydrolase 47 OS=Mus musculus GN=Usp47 PE=1 SV=2	1	19	19	19	16	13	13	13	14	14	4	2	4	3	7	9	16	13	13	13	14	14	4	2	4	3	7	9	16	13	13	13	14	14	4	2	4	3	7	9	16.4	16.4
Q8CIG8	Q8CIG8	19	19	19	Protein arginine N-methyltransferase 5	Prmt5	sp|Q8CIG8|ANM5_MOUSE Protein arginine N-methyltransferase 5 OS=Mus musculus GN=Prmt5 PE=1 SV=3	1	19	19	19	17	15	17	17	16	14	12	8	10	8	10	9	17	15	17	17	16	14	12	8	10	8	10	9	17	15	17	17	16	14	12	8	10	8	10	9	41.9	41.9
Q8CIM8	Q8CIM8	19	19	19	Integrator complex subunit 4	Ints4	sp|Q8CIM8|INT4_MOUSE Integrator complex subunit 4 OS=Mus musculus GN=Ints4 PE=1 SV=1	1	19	19	19	16	17	14	14	17	19	5	5	3	4	8	7	16	17	14	14	17	19	5	5	3	4	8	7	16	17	14	14	17	19	5	5	3	4	8	7	24.6	24.6
Q8K0D5	Q8K0D5	19	19	19	Elongation factor G, mitochondrial	Gfm1	sp|Q8K0D5|EFGM_MOUSE Elongation factor G, mitochondrial OS=Mus musculus GN=Gfm1 PE=1 SV=1	1	19	19	19	17	13	17	18	15	14	2	2	3	3	6	3	17	13	17	18	15	14	2	2	3	3	6	3	17	13	17	18	15	14	2	2	3	3	6	3	29.7	29.7
Q8R180	Q8R180	19	19	18	ERO1-like protein alpha	Ero1l	sp|Q8R180|ERO1A_MOUSE ERO1-like protein alpha OS=Mus musculus GN=Ero1a PE=1 SV=2	1	19	19	18	16	17	15	14	19	19	3	3	1	2	5	6	16	17	15	14	19	19	3	3	1	2	5	6	15	16	14	13	18	18	3	3	1	2	4	5	50	50
Q8R3C6	Q8R3C6	19	19	19	Probable RNA-binding protein 19	Rbm19	sp|Q8R3C6|RBM19_MOUSE Probable RNA-binding protein 19 OS=Mus musculus GN=Rbm19 PE=1 SV=1	1	19	19	19	14	16	12	18	12	14	9	9	8	5	6	7	14	16	12	18	12	14	9	9	8	5	6	7	14	16	12	18	12	14	9	9	8	5	6	7	23.5	23.5
Q8VCG3	Q8VCG3	19	19	19	WD repeat-containing protein 74	Wdr74	sp|Q8VCG3|WDR74_MOUSE WD repeat-containing protein 74 OS=Mus musculus GN=Wdr74 PE=2 SV=1	1	19	19	19	14	16	14	15	12	14	10	13	8	12	11	9	14	16	14	15	12	14	10	13	8	12	11	9	14	16	14	15	12	14	10	13	8	12	11	9	62.2	62.2
Q8VE19	Q8VE19	19	19	19	WD repeat-containing protein mio	Mios	sp|Q8VE19|MIO_MOUSE GATOR complex protein MIOS OS=Mus musculus GN=Mios PE=1 SV=2	1	19	19	19	16	14	13	14	14	13	9	6	9	5	9	10	16	14	13	14	14	13	9	6	9	5	9	10	16	14	13	14	14	13	9	6	9	5	9	10	29.3	29.3
Q91VC3	Q91VC3	24	19	19	Eukaryotic initiation factor 4A-III;Eukaryotic initiation factor 4A-III, N-terminally processed	Eif4a3	sp|Q91VC3|IF4A3_MOUSE Eukaryotic initiation factor 4A-III OS=Mus musculus GN=Eif4a3 PE=1 SV=3	1	24	19	19	22	21	18	21	21	21	16	13	15	14	15	18	17	16	13	16	16	16	13	10	12	11	12	14	17	16	13	16	16	16	13	10	12	11	12	14	57.9	52.1
Q91VX2	Q91VX2	19	19	19	Ubiquitin-associated protein 2	Ubap2	sp|Q91VX2|UBAP2_MOUSE Ubiquitin-associated protein 2 OS=Mus musculus GN=Ubap2 PE=1 SV=1	1	19	19	19	18	16	12	18	16	17	3	2	1	2	5	4	18	16	12	18	16	17	3	2	1	2	5	4	18	16	12	18	16	17	3	2	1	2	5	4	30.3	30.3
Q921T2	Q921T2	19	19	18	Torsin-1A-interacting protein 1	Tor1aip1	sp|Q921T2|TOIP1_MOUSE Torsin-1A-interacting protein 1 OS=Mus musculus GN=Tor1aip1 PE=1 SV=3	1	19	19	18	14	16	15	15	16	15	9	9	5	8	9	7	14	16	15	15	16	15	9	9	5	8	9	7	13	15	14	14	15	14	8	9	5	8	9	7	42	42
Q922R8	Q922R8	19	19	19	Protein disulfide-isomerase A6	Pdia6	sp|Q922R8|PDIA6_MOUSE Protein disulfide-isomerase A6 OS=Mus musculus GN=Pdia6 PE=1 SV=3	1	19	19	19	15	17	14	15	16	15	9	10	9	7	10	9	15	17	14	15	16	15	9	10	9	7	10	9	15	17	14	15	16	15	9	10	9	7	10	9	59.8	59.8
Q99K43	Q99K43	19	19	19	Protein regulator of cytokinesis 1	Prc1	sp|Q99K43|PRC1_MOUSE Protein regulator of cytokinesis 1 OS=Mus musculus GN=Prc1 PE=1 SV=2	1	19	19	19	14	16	14	17	15	15	12	11	10	11	11	10	14	16	14	17	15	15	12	11	10	11	11	10	14	16	14	17	15	15	12	11	10	11	11	10	38	38
Q99K85	Q99K85	19	19	19	Phosphoserine aminotransferase	Psat1	sp|Q99K85|SERC_MOUSE Phosphoserine aminotransferase OS=Mus musculus GN=Psat1 PE=1 SV=1	1	19	19	19	18	18	16	15	17	18	12	12	12	11	14	12	18	18	16	15	17	18	12	12	12	11	14	12	18	18	16	15	17	18	12	12	12	11	14	12	65.7	65.7
Q99KC8	Q99KC8	19	19	19	von Willebrand factor A domain-containing protein 5A	Vwa5a	sp|Q99KC8|VMA5A_MOUSE von Willebrand factor A domain-containing protein 5A OS=Mus musculus GN=Vwa5a PE=1 SV=2	1	19	19	19	16	15	17	14	15	16	7	6	3	2	10	5	16	15	17	14	15	16	7	6	3	2	10	5	16	15	17	14	15	16	7	6	3	2	10	5	32.5	32.5
Q99NB1	Q99NB1	19	19	19	Acetyl-coenzyme A synthetase 2-like, mitochondrial	Acss1	sp|Q99NB1|ACS2L_MOUSE Acetyl-coenzyme A synthetase 2-like, mitochondrial OS=Mus musculus GN=Acss1 PE=1 SV=1	1	19	19	19	14	14	15	16	17	14	10	4	6	3	10	6	14	14	15	16	17	14	10	4	6	3	10	6	14	14	15	16	17	14	10	4	6	3	10	6	37.7	37.7
Q99PP7	Q99PP7	19	19	18	E3 ubiquitin-protein ligase TRIM33	Trim33	sp|Q99PP7|TRI33_MOUSE E3 ubiquitin-protein ligase TRIM33 OS=Mus musculus GN=Trim33 PE=1 SV=2	1	19	19	18	13	16	12	13	13	14	5	4	4	3	11	9	13	16	12	13	13	14	5	4	4	3	11	9	12	15	11	12	12	13	4	4	4	3	10	8	19.2	19.2
Q9CPY7	Q9CPY7	19	19	19	Cytosol aminopeptidase	Lap3	sp|Q9CPY7|AMPL_MOUSE Cytosol aminopeptidase OS=Mus musculus GN=Lap3 PE=1 SV=3	1	19	19	19	17	18	16	17	17	18	5	1	2	1	2	1	17	18	16	17	17	18	5	1	2	1	2	1	17	18	16	17	17	18	5	1	2	1	2	1	48.2	48.2
Q9CQM9	Q9CQM9	19	19	19	Glutaredoxin-3	Glrx3	sp|Q9CQM9|GLRX3_MOUSE Glutaredoxin-3 OS=Mus musculus GN=Glrx3 PE=1 SV=1	1	19	19	19	19	17	17	17	17	17	10	12	11	9	12	11	19	17	17	17	17	17	10	12	11	9	12	11	19	17	17	17	17	17	10	12	11	9	12	11	65.3	65.3
Q9CZU6	Q9CZU6	19	19	19	Citrate synthase, mitochondrial	Cs	sp|Q9CZU6|CISY_MOUSE Citrate synthase, mitochondrial OS=Mus musculus GN=Cs PE=1 SV=1	1	19	19	19	15	16	16	17	15	14	4	3	4	3	6	4	15	16	16	17	15	14	4	3	4	3	6	4	15	16	16	17	15	14	4	3	4	3	6	4	48.1	48.1
Q9D071	Q9D071	19	19	19	MMS19 nucleotide excision repair protein homolog	Mms19	sp|Q9D071|MMS19_MOUSE MMS19 nucleotide excision repair protein homolog OS=Mus musculus GN=Mms19 PE=1 SV=1	1	19	19	19	13	16	14	12	17	16	6	8	5	2	8	7	13	16	14	12	17	16	6	8	5	2	8	7	13	16	14	12	17	16	6	8	5	2	8	7	21.8	21.8
Q9D0F9	Q9D0F9	19	19	19	Phosphoglucomutase-1	Pgm1	sp|Q9D0F9|PGM1_MOUSE Phosphoglucomutase-1 OS=Mus musculus GN=Pgm1 PE=1 SV=4	1	19	19	19	16	17	16	16	15	15	1	0	2	2	6	5	16	17	16	16	15	15	1	0	2	2	6	5	16	17	16	16	15	15	1	0	2	2	6	5	45.7	45.7
Q9D0K2	Q9D0K2	19	19	19	Succinyl-CoA:3-ketoacid coenzyme A transferase 1, mitochondrial	Oxct1	sp|Q9D0K2|SCOT1_MOUSE Succinyl-CoA:3-ketoacid coenzyme A transferase 1, mitochondrial OS=Mus musculus GN=Oxct1 PE=1 SV=1	1	19	19	19	15	15	15	17	15	14	0	0	2	3	4	2	15	15	15	17	15	14	0	0	2	3	4	2	15	15	15	17	15	14	0	0	2	3	4	2	50.6	50.6
Q9D0R4	Q9D0R4	19	19	19	Probable ATP-dependent RNA helicase DDX56	Ddx56	sp|Q9D0R4|DDX56_MOUSE Probable ATP-dependent RNA helicase DDX56 OS=Mus musculus GN=Ddx56 PE=2 SV=1	1	19	19	19	18	15	16	14	15	15	8	11	8	6	9	8	18	15	16	14	15	15	8	11	8	6	9	8	18	15	16	14	15	15	8	11	8	6	9	8	45.6	45.6
Q9D4H8	Q9D4H8	19	19	19	Cullin-2	Cul2	sp|Q9D4H8|CUL2_MOUSE Cullin-2 OS=Mus musculus GN=Cul2 PE=1 SV=2	1	19	19	19	17	16	13	15	16	16	7	8	4	4	6	8	17	16	13	15	16	16	7	8	4	4	6	8	17	16	13	15	16	16	7	8	4	4	6	8	30.1	30.1
Q9D5V5	Q9D5V5	19	19	19	Cullin-5	Cul5	sp|Q9D5V5|CUL5_MOUSE Cullin-5 OS=Mus musculus GN=Cul5 PE=1 SV=3	1	19	19	19	14	15	12	11	14	16	7	5	8	5	10	10	14	15	12	11	14	16	7	5	8	5	10	10	14	15	12	11	14	16	7	5	8	5	10	10	24.6	24.6
Q9D662	Q9D662	19	19	17	Protein transport protein Sec23B	Sec23b	sp|Q9D662|SC23B_MOUSE Protein transport protein Sec23B OS=Mus musculus GN=Sec23b PE=1 SV=1	1	19	19	17	17	18	17	18	16	17	9	7	10	7	7	7	17	18	17	18	16	17	9	7	10	7	7	7	16	16	15	16	15	16	8	6	8	6	6	6	37.2	37.2
Q9D8W5	Q9D8W5	19	19	19	26S proteasome non-ATPase regulatory subunit 12	Psmd12	sp|Q9D8W5|PSD12_MOUSE 26S proteasome non-ATPase regulatory subunit 12 OS=Mus musculus GN=Psmd12 PE=1 SV=4	1	19	19	19	18	18	13	17	17	19	14	14	12	10	16	16	18	18	13	17	17	19	14	14	12	10	16	16	18	18	13	17	17	19	14	14	12	10	16	16	43.2	43.2
Q9D903	Q9D903	19	19	19	Probable rRNA-processing protein EBP2	Ebna1bp2	sp|Q9D903|EBP2_MOUSE Probable rRNA-processing protein EBP2 OS=Mus musculus GN=Ebna1bp2 PE=2 SV=1	1	19	19	19	14	14	14	13	16	15	11	15	11	7	10	12	14	14	14	13	16	15	11	15	11	7	10	12	14	14	14	13	16	15	11	15	11	7	10	12	47.4	47.4
Q9DC23	Q9DC23	19	19	19	DnaJ homolog subfamily C member 10	Dnajc10	sp|Q9DC23|DJC10_MOUSE DnaJ homolog subfamily C member 10 OS=Mus musculus GN=Dnajc10 PE=1 SV=2	1	19	19	19	17	15	9	14	18	17	8	7	5	4	5	6	17	15	9	14	18	17	8	7	5	4	5	6	17	15	9	14	18	17	8	7	5	4	5	6	31.9	31.9
Q9EPK7	Q9EPK7	19	19	19	Exportin-7	Xpo7	sp|Q9EPK7|XPO7_MOUSE Exportin-7 OS=Mus musculus GN=Xpo7 PE=1 SV=3	1	19	19	19	16	14	14	13	14	16	7	6	7	4	4	6	16	14	14	13	14	16	7	6	7	4	4	6	16	14	14	13	14	16	7	6	7	4	4	6	21.4	21.4
Q9EQ61	Q9EQ61	19	19	19	Pescadillo homolog	Pes1	sp|Q9EQ61|PESC_MOUSE Pescadillo homolog OS=Mus musculus GN=Pes1 PE=1 SV=1	1	19	19	19	12	13	14	15	12	14	12	12	6	9	9	9	12	13	14	15	12	14	12	12	6	9	9	9	12	13	14	15	12	14	12	12	6	9	9	9	39	39
Q9EQM6	Q9EQM6	19	19	19	Microprocessor complex subunit DGCR8	Dgcr8	sp|Q9EQM6|DGCR8_MOUSE Microprocessor complex subunit DGCR8 OS=Mus musculus GN=Dgcr8 PE=1 SV=2	1	19	19	19	15	16	15	15	11	15	8	6	6	4	8	7	15	16	15	15	11	15	8	6	6	4	8	7	15	16	15	15	11	15	8	6	6	4	8	7	30.1	30.1
Q9QXK7	Q9QXK7	19	19	19	Cleavage and polyadenylation specificity factor subunit 3	Cpsf3	sp|Q9QXK7|CPSF3_MOUSE Cleavage and polyadenylation specificity factor subunit 3 OS=Mus musculus GN=Cpsf3 PE=1 SV=2	1	19	19	19	15	13	15	15	12	14	7	8	5	4	7	7	15	13	15	15	12	14	7	8	5	4	7	7	15	13	15	15	12	14	7	8	5	4	7	7	34.6	34.6
Q9QZQ8	Q9QZQ8	19	19	17	Core histone macro-H2A.1	H2afy	sp|Q9QZQ8|H2AY_MOUSE Core histone macro-H2A.1 OS=Mus musculus GN=H2afy PE=1 SV=3	1	19	19	17	18	16	18	17	18	17	19	18	15	16	17	15	18	16	18	17	18	17	19	18	15	16	17	15	16	14	16	15	16	15	17	16	13	14	15	13	56.2	56.2
Q9R0N0	Q9R0N0	19	19	19	Galactokinase	Galk1	sp|Q9R0N0|GALK1_MOUSE Galactokinase OS=Mus musculus GN=Galk1 PE=1 SV=2	1	19	19	19	17	17	14	14	15	15	11	9	9	10	11	8	17	17	14	14	15	15	11	9	9	10	11	8	17	17	14	14	15	15	11	9	9	10	11	8	60.7	60.7
Q9R1P4	Q9R1P4	19	19	19	Proteasome subunit alpha type-1	Psma1	sp|Q9R1P4|PSA1_MOUSE Proteasome subunit alpha type-1 OS=Mus musculus GN=Psma1 PE=1 SV=1	1	19	19	19	17	14	11	15	16	17	6	6	3	4	6	3	17	14	11	15	16	17	6	6	3	4	6	3	17	14	11	15	16	17	6	6	3	4	6	3	72.2	72.2
Q9Z0X1	Q9Z0X1	19	19	19	Apoptosis-inducing factor 1, mitochondrial	Aifm1	sp|Q9Z0X1|AIFM1_MOUSE Apoptosis-inducing factor 1, mitochondrial OS=Mus musculus GN=Aifm1 PE=1 SV=1	1	19	19	19	16	14	12	14	12	13	8	7	7	3	8	6	16	14	12	14	12	13	8	7	7	3	8	6	16	14	12	14	12	13	8	7	7	3	8	6	37.7	37.7
A8C756	A8C756	18	18	18	Thyroid adenoma-associated protein homolog	Thada	sp|A8C756|THADA_MOUSE Thyroid adenoma-associated protein homolog OS=Mus musculus GN=Thada PE=1 SV=1	1	18	18	18	12	11	13	12	16	17	9	5	5	5	5	9	12	11	13	12	16	17	9	5	5	5	5	9	12	11	13	12	16	17	9	5	5	5	5	9	10.8	10.8
D3Z7P3	D3Z7P3	18	18	18	Glutaminase kidney isoform, mitochondrial	Gls	sp|D3Z7P3|GLSK_MOUSE Glutaminase kidney isoform, mitochondrial OS=Mus musculus GN=Gls PE=1 SV=1	1	18	18	18	16	18	16	16	16	15	8	5	8	7	6	6	16	18	16	16	16	15	8	5	8	7	6	6	16	18	16	16	16	15	8	5	8	7	6	6	34.9	34.9
O08573	O08573	18	18	18	Galectin-9	Lgals9	sp|O08573|LEG9_MOUSE Galectin-9 OS=Mus musculus GN=Lgals9 PE=1 SV=1	1	18	18	18	18	18	16	17	18	18	10	11	10	11	12	13	18	18	16	17	18	18	10	11	10	11	12	13	18	18	16	17	18	18	10	11	10	11	12	13	54.7	54.7
O35129	O35129	18	18	18	Prohibitin-2	Phb2	sp|O35129|PHB2_MOUSE Prohibitin-2 OS=Mus musculus GN=Phb2 PE=1 SV=1	1	18	18	18	14	17	11	14	13	12	10	12	9	7	11	8	14	17	11	14	13	12	10	12	9	7	11	8	14	17	11	14	13	12	10	12	9	7	11	8	62.9	62.9
O55131;Q9DA97;Q8C650	O55131	18;1;1	18;1;1	18;1;1	Septin-7	2007-09-01	sp|O55131|SEPT7_MOUSE Septin-7 OS=Mus musculus GN=Sept7 PE=1 SV=1	3	18	18	18	15	13	14	15	16	15	11	11	8	9	12	11	15	13	14	15	16	15	11	11	8	9	12	11	15	13	14	15	16	15	11	11	8	9	12	11	43.1	43.1
O70310	O70310	18	18	14	Glycylpeptide N-tetradecanoyltransferase 1	Nmt1	sp|O70310|NMT1_MOUSE Glycylpeptide N-tetradecanoyltransferase 1 OS=Mus musculus GN=Nmt1 PE=1 SV=1	1	18	18	14	14	17	11	12	14	15	10	9	8	10	9	10	14	17	11	12	14	15	10	9	8	10	9	10	11	13	9	10	11	11	9	8	7	9	8	9	49	49
O88544	O88544	18	18	18	COP9 signalosome complex subunit 4	Cops4	sp|O88544|CSN4_MOUSE COP9 signalosome complex subunit 4 OS=Mus musculus GN=Cops4 PE=1 SV=1	1	18	18	18	16	17	15	15	16	17	10	5	6	4	6	6	16	17	15	15	16	17	10	5	6	4	6	6	16	17	15	15	16	17	10	5	6	4	6	6	55.2	55.2
O88700	O88700	18	18	18	Bloom syndrome protein homolog	Blm	sp|O88700|BLM_MOUSE Bloom syndrome protein homolog OS=Mus musculus GN=Blm PE=1 SV=1	1	18	18	18	14	12	11	14	16	15	8	4	6	4	7	7	14	12	11	14	16	15	8	4	6	4	7	7	14	12	11	14	16	15	8	4	6	4	7	7	17	17
O88844	O88844	19	18	18	Isocitrate dehydrogenase [NADP] cytoplasmic	Idh1	sp|O88844|IDHC_MOUSE Isocitrate dehydrogenase [NADP] cytoplasmic OS=Mus musculus GN=Idh1 PE=1 SV=2	1	19	18	18	15	14	10	15	16	17	6	5	5	5	8	11	14	13	9	14	15	16	6	5	5	5	8	11	14	13	9	14	15	16	6	5	5	5	8	11	51.2	49
P01872	P01872	18	18	18	Ig mu chain C region	Ighm	sp|P01872|IGHM_MOUSE Ig mu chain C region OS=Mus musculus GN=Ighm PE=1 SV=2	1	18	18	18	15	16	14	15	9	8	11	13	12	8	5	3	15	16	14	15	9	8	11	13	12	8	5	3	15	16	14	15	9	8	11	13	12	8	5	3	41.2	41.2
P09055	P09055	18	18	18	Integrin beta-1	Itgb1	sp|P09055|ITB1_MOUSE Integrin beta-1 OS=Mus musculus GN=Itgb1 PE=1 SV=1	1	18	18	18	13	14	14	17	13	11	2	0	1	2	2	2	13	14	14	17	13	11	2	0	1	2	2	2	13	14	14	17	13	11	2	0	1	2	2	2	29.3	29.3
P10711	P10711	18	18	17	Transcription elongation factor A protein 1	Tcea1	sp|P10711|TCEA1_MOUSE Transcription elongation factor A protein 1 OS=Mus musculus GN=Tcea1 PE=1 SV=2	1	18	18	17	14	15	13	15	16	14	5	6	6	6	11	7	14	15	13	15	16	14	5	6	6	6	11	7	13	14	13	14	15	13	4	6	6	6	10	7	56.5	56.5
P11440	P11440	19	18	17	Cyclin-dependent kinase 1	Cdk1	sp|P11440|CDK1_MOUSE Cyclin-dependent kinase 1 OS=Mus musculus GN=Cdk1 PE=1 SV=3	1	19	18	17	18	17	16	15	15	16	13	14	7	9	13	12	17	16	15	14	14	15	12	13	6	8	12	11	16	15	15	14	14	14	11	12	6	7	12	11	56.6	53.9
P14131	P14131	18	18	18	40S ribosomal protein S16	Rps16	sp|P14131|RS16_MOUSE 40S ribosomal protein S16 OS=Mus musculus GN=Rps16 PE=1 SV=4	1	18	18	18	18	16	12	14	14	14	12	13	10	10	11	10	18	16	12	14	14	14	12	13	10	10	11	10	18	16	12	14	14	14	12	13	10	10	11	10	75.3	75.3
P14869	P14869	18	18	18	60S acidic ribosomal protein P0	Rplp0	sp|P14869|RLA0_MOUSE 60S acidic ribosomal protein P0 OS=Mus musculus GN=Rplp0 PE=1 SV=3	1	18	18	18	18	17	16	17	17	17	14	15	13	12	15	15	18	17	16	17	17	17	14	15	13	12	15	15	18	17	16	17	17	17	14	15	13	12	15	15	65.6	65.6
P19157;P46425	P19157;P46425	18;12	18;12	18;12	Glutathione S-transferase P 1;Glutathione S-transferase P 2	Gstp1;Gstp2	sp|P19157|GSTP1_MOUSE Glutathione S-transferase P 1 OS=Mus musculus GN=Gstp1 PE=1 SV=2;sp|P46425|GSTP2_MOUSE Glutathione S-transferase P 2 OS=Mus musculus GN=Gstp2 PE=1 SV=2	2	18	18	18	16	15	16	14	15	16	10	10	7	8	13	11	16	15	16	14	15	16	10	10	7	8	13	11	16	15	16	14	15	16	10	10	7	8	13	11	69.5	69.5
P25799	P25799	18	18	18	Nuclear factor NF-kappa-B p105 subunit;Nuclear factor NF-kappa-B p50 subunit	Nfkb1	sp|P25799|NFKB1_MOUSE Nuclear factor NF-kappa-B p105 subunit OS=Mus musculus GN=Nfkb1 PE=1 SV=2	1	18	18	18	14	14	11	16	9	15	5	7	4	4	8	5	14	14	11	16	9	15	5	7	4	4	8	5	14	14	11	16	9	15	5	7	4	4	8	5	21.6	21.6
P28740	P28740	19	18	17	Kinesin-like protein KIF2A	Kif2a	sp|P28740|KIF2A_MOUSE Kinesin-like protein KIF2A OS=Mus musculus GN=Kif2a PE=1 SV=2	1	19	18	17	16	15	15	18	14	14	7	12	8	5	11	10	15	14	14	17	14	14	7	12	8	5	11	10	14	13	13	16	13	13	7	12	8	5	11	10	30.5	29.2
P32921	P32921	18	18	18	Tryptophan--tRNA ligase, cytoplasmic;T1-TrpRS;T2-TrpRS	Wars	sp|P32921|SYWC_MOUSE Tryptophan--tRNA ligase, cytoplasmic OS=Mus musculus GN=Wars PE=1 SV=2	1	18	18	18	14	12	13	12	12	11	9	10	7	6	12	9	14	12	13	12	12	11	9	10	7	6	12	9	14	12	13	12	12	11	9	10	7	6	12	9	44.9	44.9
P46664	P46664	18	18	17	Adenylosuccinate synthetase isozyme 2	Adss	sp|P46664|PURA2_MOUSE Adenylosuccinate synthetase isozyme 2 OS=Mus musculus GN=Adss PE=1 SV=2	1	18	18	17	15	16	15	15	16	17	7	4	5	5	9	9	15	16	15	15	16	17	7	4	5	5	9	9	15	16	15	15	16	16	7	4	5	5	9	9	49.1	49.1
P51660	P51660	18	18	18	Peroxisomal multifunctional enzyme type 2;(3R)-hydroxyacyl-CoA dehydrogenase;Enoyl-CoA hydratase 2	Hsd17b4	sp|P51660|DHB4_MOUSE Peroxisomal multifunctional enzyme type 2 OS=Mus musculus GN=Hsd17b4 PE=1 SV=3	1	18	18	18	13	13	13	11	16	14	4	4	2	3	6	7	13	13	13	11	16	14	4	4	2	3	6	7	13	13	13	11	16	14	4	4	2	3	6	7	35.5	35.5
P55194	P55194	18	18	18	SH3 domain-binding protein 1	Sh3bp1	sp|P55194|3BP1_MOUSE SH3 domain-binding protein 1 OS=Mus musculus GN=Sh3bp1 PE=1 SV=3	1	18	18	18	15	13	10	16	16	16	6	5	4	6	5	6	15	13	10	16	16	16	6	5	4	6	5	6	15	13	10	16	16	16	6	5	4	6	5	6	36.9	36.9
P62082	P62082	18	18	18	40S ribosomal protein S7	Rps7	sp|P62082|RS7_MOUSE 40S ribosomal protein S7 OS=Mus musculus GN=Rps7 PE=2 SV=1	1	18	18	18	17	17	13	16	16	15	14	13	12	11	12	13	17	17	13	16	16	15	14	13	12	11	12	13	17	17	13	16	16	15	14	13	12	11	12	13	68.6	68.6
P62259	P62259	21	18	18	14-3-3 protein epsilon	Ywhae	sp|P62259|1433E_MOUSE 14-3-3 protein epsilon OS=Mus musculus GN=Ywhae PE=1 SV=1	1	21	18	18	20	20	19	20	20	21	11	11	11	7	13	11	17	17	17	17	17	18	9	9	9	6	11	9	17	17	17	17	17	18	9	9	9	6	11	9	66.7	59.6
P62814	P62814	18	18	18	V-type proton ATPase subunit B, brain isoform	Atp6v1b2	sp|P62814|VATB2_MOUSE V-type proton ATPase subunit B, brain isoform OS=Mus musculus GN=Atp6v1b2 PE=1 SV=1	1	18	18	18	15	16	17	15	15	17	8	6	6	5	2	3	15	16	17	15	15	17	8	6	6	5	2	3	15	16	17	15	15	17	8	6	6	5	2	3	47.4	47.4
P63242;Q8BGY2	P63242;Q8BGY2	18;9	18;9	18;9	Eukaryotic translation initiation factor 5A-1;Eukaryotic translation initiation factor 5A-2	Eif5a;Eif5a2	sp|P63242|IF5A1_MOUSE Eukaryotic translation initiation factor 5A-1 OS=Mus musculus GN=Eif5a PE=1 SV=2;sp|Q8BGY2|IF5A2_MOUSE Eukaryotic translation initiation factor 5A-2 OS=Mus musculus GN=Eif5a2 PE=1 SV=3	2	18	18	18	15	15	16	15	15	15	8	11	10	8	8	12	15	15	16	15	15	15	8	11	10	8	8	12	15	15	16	15	15	15	8	11	10	8	8	12	85.1	85.1
P70268;Q8K045	P70268	18;1	18;1	17;0	Serine/threonine-protein kinase N1	Pkn1	sp|P70268|PKN1_MOUSE Serine/threonine-protein kinase N1 OS=Mus musculus GN=Pkn1 PE=1 SV=3	2	18	18	17	14	16	13	15	14	16	8	8	7	6	11	9	14	16	13	15	14	16	8	8	7	6	11	9	13	15	12	14	13	15	7	7	6	5	10	8	19.7	19.7
P97303	P97303	18	18	18	Transcription regulator protein BACH2	Bach2	sp|P97303|BACH2_MOUSE Transcription regulator protein BACH2 OS=Mus musculus GN=Bach2 PE=1 SV=3	1	18	18	18	15	11	11	13	9	11	12	12	9	8	6	8	15	11	11	13	9	11	12	12	9	8	6	8	15	11	11	13	9	11	12	12	9	8	6	8	29.4	29.4
P97789	P97789	18	18	18	5-3 exoribonuclease 1	Xrn1	sp|P97789|XRN1_MOUSE 5-3 exoribonuclease 1 OS=Mus musculus GN=Xrn1 PE=1 SV=1	1	18	18	18	15	14	13	11	14	14	9	5	5	3	7	8	15	14	13	11	14	14	9	5	5	3	7	8	15	14	13	11	14	14	9	5	5	3	7	8	14	14
Q02395	Q02395	18	18	18	Metal-response element-binding transcription factor 2	Mtf2	sp|Q02395|MTF2_MOUSE Metal-response element-binding transcription factor 2 OS=Mus musculus GN=Mtf2 PE=1 SV=2	1	18	18	18	12	8	6	12	11	9	9	9	9	7	4	7	12	8	6	12	11	9	9	9	9	7	4	7	12	8	6	12	11	9	9	9	9	7	4	7	38.8	38.8
Q3UFM5	Q3UFM5	18	18	18	Nucleolar MIF4G domain-containing protein 1	Nom1	sp|Q3UFM5|NOM1_MOUSE Nucleolar MIF4G domain-containing protein 1 OS=Mus musculus GN=Nom1 PE=1 SV=2	1	18	18	18	15	13	13	12	13	14	8	10	7	8	7	4	15	13	13	12	13	14	8	10	7	8	7	4	15	13	13	12	13	14	8	10	7	8	7	4	25.1	25.1
Q3UFY8	Q3UFY8	18	18	18	Mitochondrial ribonuclease P protein 1	Trmt10c	sp|Q3UFY8|TM10C_MOUSE tRNA methyltransferase 10 homolog C OS=Mus musculus GN=Trmt10c PE=1 SV=2	1	18	18	18	13	14	12	12	13	15	9	7	11	7	9	11	13	14	12	12	13	15	9	7	11	7	9	11	13	14	12	12	13	15	9	7	11	7	9	11	47.3	47.3
Q3UIR3	Q3UIR3	18	18	18	E3 ubiquitin-protein ligase DTX3L	Dtx3l	sp|Q3UIR3|DTX3L_MOUSE E3 ubiquitin-protein ligase DTX3L OS=Mus musculus GN=Dtx3l PE=1 SV=1	1	18	18	18	13	12	13	12	12	14	8	9	6	4	8	9	13	12	13	12	12	14	8	9	6	4	8	9	13	12	13	12	12	14	8	9	6	4	8	9	33	33
Q3UMF0	Q3UMF0	18	18	18	Cordon-bleu protein-like 1	Cobll1	sp|Q3UMF0|COBL1_MOUSE Cordon-bleu protein-like 1 OS=Mus musculus GN=Cobll1 PE=1 SV=2	1	18	18	18	13	12	10	10	15	14	5	4	2	3	5	5	13	12	10	10	15	14	5	4	2	3	5	5	13	12	10	10	15	14	5	4	2	3	5	5	18.9	18.9
Q3URQ0	Q3URQ0	18	18	18	Testis-expressed sequence 10 protein	Tex10	sp|Q3URQ0|TEX10_MOUSE Testis-expressed protein 10 OS=Mus musculus GN=Tex10 PE=1 SV=1	1	18	18	18	17	16	16	18	15	16	11	12	7	9	11	9	17	16	16	18	15	16	11	12	7	9	11	9	17	16	16	18	15	16	11	12	7	9	11	9	26.2	26.2
Q4FZC9	Q4FZC9	18	18	18	Nesprin-3	Syne3	sp|Q4FZC9|SYNE3_MOUSE Nesprin-3 OS=Mus musculus GN=Syne3 PE=1 SV=1	1	18	18	18	14	15	14	12	16	16	3	4	3	5	4	2	14	15	14	12	16	16	3	4	3	5	4	2	14	15	14	12	16	16	3	4	3	5	4	2	25	25
Q60715	Q60715	18	18	18	Prolyl 4-hydroxylase subunit alpha-1	P4ha1	sp|Q60715|P4HA1_MOUSE Prolyl 4-hydroxylase subunit alpha-1 OS=Mus musculus GN=P4ha1 PE=1 SV=2	1	18	18	18	16	15	14	15	13	13	9	12	10	11	10	10	16	15	14	15	13	13	9	12	10	11	10	10	16	15	14	15	13	13	9	12	10	11	10	10	39.7	39.7
Q60902	Q60902	18	18	18	Epidermal growth factor receptor substrate 15-like 1	Eps15l1	sp|Q60902|EP15R_MOUSE Epidermal growth factor receptor substrate 15-like 1 OS=Mus musculus GN=Eps15l1 PE=1 SV=3	1	18	18	18	13	17	14	15	14	12	6	9	8	7	8	9	13	17	14	15	14	12	6	9	8	7	8	9	13	17	14	15	14	12	6	9	8	7	8	9	24	24
Q61188	Q61188	18	18	16	Histone-lysine N-methyltransferase EZH2	Ezh2	sp|Q61188|EZH2_MOUSE Histone-lysine N-methyltransferase EZH2 OS=Mus musculus GN=Ezh2 PE=1 SV=2	1	18	18	16	15	15	11	15	13	14	9	13	9	8	10	13	15	15	11	15	13	14	9	13	9	8	10	13	13	14	10	14	12	13	8	13	8	8	9	12	30.8	30.8
Q61510	Q61510	18	18	18	E3 ubiquitin/ISG15 ligase TRIM25	Trim25	sp|Q61510|TRI25_MOUSE E3 ubiquitin/ISG15 ligase TRIM25 OS=Mus musculus GN=Trim25 PE=1 SV=2	1	18	18	18	14	13	14	11	14	16	7	4	5	7	7	9	14	13	14	11	14	16	7	4	5	7	7	9	14	13	14	11	14	16	7	4	5	7	7	9	36.3	36.3
Q62018	Q62018	18	18	18	RNA polymerase-associated protein CTR9 homolog	Ctr9	sp|Q62018|CTR9_MOUSE RNA polymerase-associated protein CTR9 homolog OS=Mus musculus GN=Ctr9 PE=1 SV=2	1	18	18	18	13	14	11	13	12	15	3	7	3	1	7	7	13	14	11	13	12	15	3	7	3	1	7	7	13	14	11	13	12	15	3	7	3	1	7	7	18.8	18.8
Q62384	Q62384	18	18	18	Zinc finger protein ZPR1	Zpr1	sp|Q62384|ZPR1_MOUSE Zinc finger protein ZPR1 OS=Mus musculus GN=Zpr1 PE=1 SV=1	1	18	18	18	16	14	17	16	15	14	5	5	5	4	8	9	16	14	17	16	15	14	5	5	5	4	8	9	16	14	17	16	15	14	5	5	5	4	8	9	60.3	60.3
Q64012	Q64012	18	18	18	RNA-binding protein Raly	Raly	sp|Q64012|RALY_MOUSE RNA-binding protein Raly OS=Mus musculus GN=Raly PE=1 SV=3	1	18	18	18	17	16	13	16	17	17	11	12	9	9	11	10	17	16	13	16	17	17	11	12	9	9	11	10	17	16	13	16	17	17	11	12	9	9	11	10	66.3	66.3
Q6DID3	Q6DID3	18	18	18	Protein SCAF8	Scaf8	sp|Q6DID3|SCAF8_MOUSE Protein SCAF8 OS=Mus musculus GN=Scaf8 PE=1 SV=1	1	18	18	18	12	16	13	13	11	12	11	12	10	9	7	10	12	16	13	13	11	12	11	12	10	9	7	10	12	16	13	13	11	12	11	12	10	9	7	10	18.8	18.8
Q6P5E6	Q6P5E6	18	18	17	ADP-ribosylation factor-binding protein GGA2	Gga2	sp|Q6P5E6|GGA2_MOUSE ADP-ribosylation factor-binding protein GGA2 OS=Mus musculus GN=Gga2 PE=1 SV=1	1	18	18	17	13	16	12	14	14	11	7	9	6	5	4	6	13	16	12	14	14	11	7	9	6	5	4	6	13	16	12	14	13	11	7	9	6	4	4	6	43.3	43.3
Q6PAC3	Q6PAC3	18	18	18	DDB1- and CUL4-associated factor 13	Dcaf13	sp|Q6PAC3|DCA13_MOUSE DDB1- and CUL4-associated factor 13 OS=Mus musculus GN=Dcaf13 PE=2 SV=2	1	18	18	18	12	12	12	11	16	11	7	9	8	10	9	9	12	12	12	11	16	11	7	9	8	10	9	9	12	12	12	11	16	11	7	9	8	10	9	9	45.6	45.6
Q7TNC4	Q7TNC4	18	18	12	Putative RNA-binding protein Luc7-like 2	Luc7l2	sp|Q7TNC4|LC7L2_MOUSE Putative RNA-binding protein Luc7-like 2 OS=Mus musculus GN=Luc7l2 PE=1 SV=1	1	18	18	12	16	17	14	14	15	17	12	13	13	14	13	13	16	17	14	14	15	17	12	13	13	14	13	13	10	11	10	8	9	11	7	8	8	9	7	9	47.7	47.7
Q7TNP2	Q7TNP2	25	18	18	Serine/threonine-protein phosphatase 2A 65 kDa regulatory subunit A beta isoform	Ppp2r1b	sp|Q7TNP2|2AAB_MOUSE Serine/threonine-protein phosphatase 2A 65 kDa regulatory subunit A beta isoform OS=Mus musculus GN=Ppp2r1b PE=1 SV=2	1	25	18	18	21	21	19	20	22	21	11	8	11	9	13	12	16	16	14	15	17	16	7	4	6	5	8	6	16	16	14	15	17	16	7	4	6	5	8	6	55.1	37.4
Q7TSG1	Q7TSG1	18	18	18	Centrosomal protein of 120 kDa	Cep120	sp|Q7TSG1|CE120_MOUSE Centrosomal protein of 120 kDa OS=Mus musculus GN=Cep120 PE=1 SV=1	1	18	18	18	9	12	7	11	11	10	8	11	11	10	11	13	9	12	7	11	11	10	8	11	11	10	11	13	9	12	7	11	11	10	8	11	11	10	11	13	21	21
Q8BGS1	Q8BGS1	18	18	15	Band 4.1-like protein 5	Epb41l5	sp|Q8BGS1|E41L5_MOUSE Band 4.1-like protein 5 OS=Mus musculus GN=Epb41l5 PE=1 SV=1	1	18	18	15	18	16	15	16	12	12	6	6	6	5	6	5	18	16	15	16	12	12	6	6	6	5	6	5	15	13	13	14	9	9	6	5	6	5	6	5	30	30
Q8BJ34	Q8BJ34	18	18	18	Meiosis arrest female protein 1	Marf1	sp|Q8BJ34|MARF1_MOUSE Meiosis regulator and mRNA stability factor 1 OS=Mus musculus GN=Marf1 PE=1 SV=3	1	18	18	18	12	12	12	13	14	12	7	7	6	7	8	6	12	12	12	13	14	12	7	7	6	7	8	6	12	12	12	13	14	12	7	7	6	7	8	6	14.1	14.1
Q8BKX6	Q8BKX6	18	18	18	Serine/threonine-protein kinase SMG1	Smg1	sp|Q8BKX6|SMG1_MOUSE Serine/threonine-protein kinase SMG1 OS=Mus musculus GN=Smg1 PE=1 SV=3	1	18	18	18	13	13	10	11	13	16	3	2	1	2	4	2	13	13	10	11	13	16	3	2	1	2	4	2	13	13	10	11	13	16	3	2	1	2	4	2	7.3	7.3
Q8BLR5	Q8BLR5	18	18	18	PH and SEC7 domain-containing protein 4	Psd4	sp|Q8BLR5|PSD4_MOUSE PH and SEC7 domain-containing protein 4 OS=Mus musculus GN=Psd4 PE=1 SV=1	1	18	18	18	13	13	12	12	9	12	7	6	6	4	8	9	13	13	12	12	9	12	7	6	6	4	8	9	13	13	12	12	9	12	7	6	6	4	8	9	23	23
Q8BUV3	Q8BUV3	18	18	18	Gephyrin;Molybdopterin adenylyltransferase;Molybdopterin molybdenumtransferase	Gphn	sp|Q8BUV3|GEPH_MOUSE Gephyrin OS=Mus musculus GN=Gphn PE=1 SV=2	1	18	18	18	13	13	11	12	9	14	7	5	3	3	6	4	13	13	11	12	9	14	7	5	3	3	6	4	13	13	11	12	9	14	7	5	3	3	6	4	32.6	32.6
Q8C0I1	Q8C0I1	18	18	18	Alkyldihydroxyacetonephosphate synthase, peroxisomal	Agps	sp|Q8C0I1|ADAS_MOUSE Alkyldihydroxyacetonephosphate synthase, peroxisomal OS=Mus musculus GN=Agps PE=1 SV=1	1	18	18	18	13	16	12	12	14	12	5	2	2	3	6	3	13	16	12	12	14	12	5	2	2	3	6	3	13	16	12	12	14	12	5	2	2	3	6	3	42.9	42.9
Q8C2B3	Q8C2B3	18	18	18	Histone deacetylase 7	Hdac7	sp|Q8C2B3|HDAC7_MOUSE Histone deacetylase 7 OS=Mus musculus GN=Hdac7 PE=1 SV=2	1	18	18	18	14	15	15	14	15	15	6	4	2	5	4	4	14	15	15	14	15	15	6	4	2	5	4	4	14	15	15	14	15	15	6	4	2	5	4	4	31.7	31.7
Q8C5N3	Q8C5N3	18	18	18	Pre-mRNA-splicing factor CWC22 homolog	Cwc22	sp|Q8C5N3|CWC22_MOUSE Pre-mRNA-splicing factor CWC22 homolog OS=Mus musculus GN=Cwc22 PE=1 SV=1	1	18	18	18	17	16	8	13	6	11	9	9	6	7	5	7	17	16	8	13	6	11	9	9	6	7	5	7	17	16	8	13	6	11	9	9	6	7	5	7	19.8	19.8
Q8C9B9	Q8C9B9	18	18	18	Death-inducer obliterator 1	Dido1	sp|Q8C9B9|DIDO1_MOUSE Death-inducer obliterator 1 OS=Mus musculus GN=Dido1 PE=1 SV=4	1	18	18	18	12	12	12	10	6	9	7	8	7	3	7	5	12	12	12	10	6	9	7	8	7	3	7	5	12	12	12	10	6	9	7	8	7	3	7	5	10.7	10.7
Q8CDN6	Q8CDN6	18	18	18	Thioredoxin-like protein 1	Txnl1	sp|Q8CDN6|TXNL1_MOUSE Thioredoxin-like protein 1 OS=Mus musculus GN=Txnl1 PE=1 SV=3	1	18	18	18	16	15	18	17	15	14	12	9	10	9	11	13	16	15	18	17	15	14	12	9	10	9	11	13	16	15	18	17	15	14	12	9	10	9	11	13	66.1	66.1
Q8CI75	Q8CI75	18	18	18	DIS3-like exonuclease 2	Dis3l2	sp|Q8CI75|DI3L2_MOUSE DIS3-like exonuclease 2 OS=Mus musculus GN=Dis3l2 PE=1 SV=1	1	18	18	18	15	13	14	13	9	12	4	2	5	2	5	6	15	13	14	13	9	12	4	2	5	2	5	6	15	13	14	13	9	12	4	2	5	2	5	6	24.6	24.6
Q8JZN5	Q8JZN5	18	18	18	Acyl-CoA dehydrogenase family member 9, mitochondrial	Acad9	sp|Q8JZN5|ACAD9_MOUSE Acyl-CoA dehydrogenase family member 9, mitochondrial OS=Mus musculus GN=Acad9 PE=1 SV=2	1	18	18	18	16	16	14	14	13	14	5	7	7	3	4	5	16	16	14	14	13	14	5	7	7	3	4	5	16	16	14	14	13	14	5	7	7	3	4	5	41.8	41.8
Q8JZR0	Q8JZR0	18	18	15	Long-chain-fatty-acid--CoA ligase 5	Acsl5	sp|Q8JZR0|ACSL5_MOUSE Long-chain-fatty-acid--CoA ligase 5 OS=Mus musculus GN=Acsl5 PE=1 SV=1	1	18	18	15	15	15	15	16	14	12	9	9	9	8	8	9	15	15	15	16	14	12	9	9	9	8	8	9	13	13	12	14	12	11	9	8	9	8	7	9	31.9	31.9
Q8K327	Q8K327	18	18	18	Chromosome alignment-maintaining phosphoprotein 1	Champ1	sp|Q8K327|CHAP1_MOUSE Chromosome alignment-maintaining phosphoprotein 1 OS=Mus musculus GN=Champ1 PE=1 SV=1	1	18	18	18	16	13	11	11	13	12	7	6	6	7	7	8	16	13	11	11	13	12	7	6	6	7	7	8	16	13	11	11	13	12	7	6	6	7	7	8	26.8	26.8
Q8R1Q8	Q8R1Q8	18	18	17	Cytoplasmic dynein 1 light intermediate chain 1	Dync1li1	sp|Q8R1Q8|DC1L1_MOUSE Cytoplasmic dynein 1 light intermediate chain 1 OS=Mus musculus GN=Dync1li1 PE=1 SV=1	1	18	18	17	16	14	15	14	15	15	10	10	8	6	10	8	16	14	15	14	15	15	10	10	8	6	10	8	15	13	14	13	14	14	9	10	8	5	9	7	46.3	46.3
Q8R3N6	Q8R3N6	18	18	18	THO complex subunit 1	Thoc1	sp|Q8R3N6|THOC1_MOUSE THO complex subunit 1 OS=Mus musculus GN=Thoc1 PE=1 SV=1	1	18	18	18	15	15	12	15	16	13	5	6	4	3	6	3	15	15	12	15	16	13	5	6	4	3	6	3	15	15	12	15	16	13	5	6	4	3	6	3	34.9	34.9
Q8R5K4	Q8R5K4	18	18	18	Nucleolar protein 6	Nol6	sp|Q8R5K4|NOL6_MOUSE Nucleolar protein 6 OS=Mus musculus GN=Nol6 PE=2 SV=2	1	18	18	18	14	15	14	14	12	11	13	13	12	10	14	12	14	15	14	14	12	11	13	13	12	10	14	12	14	15	14	14	12	11	13	13	12	10	14	12	22.9	22.9
Q8VE37	Q8VE37	18	18	18	Regulator of chromosome condensation	Rcc1	sp|Q8VE37|RCC1_MOUSE Regulator of chromosome condensation OS=Mus musculus GN=Rcc1 PE=1 SV=1	1	18	18	18	16	16	16	16	17	17	14	13	11	13	16	12	16	16	16	16	17	17	14	13	11	13	16	12	16	16	16	16	17	17	14	13	11	13	16	12	60.6	60.6
Q91WD7	Q91WD7	18	18	17	Kinesin-like protein KIF18A	Kif18a	sp|Q91WD7|KI18A_MOUSE Kinesin-like protein KIF18A OS=Mus musculus GN=Kif18a PE=2 SV=1	1	18	18	17	17	12	10	14	13	13	13	7	6	7	10	8	17	12	10	14	13	13	13	7	6	7	10	8	16	11	9	13	12	12	12	6	6	6	9	7	24.6	24.6
Q921C5;Q8BR07	Q921C5	18;4	18;4	18;4	Protein bicaudal D homolog 2	Bicd2	sp|Q921C5|BICD2_MOUSE Protein bicaudal D homolog 2 OS=Mus musculus GN=Bicd2 PE=1 SV=1	2	18	18	18	13	16	11	13	11	11	2	3	0	0	5	5	13	16	11	13	11	11	2	3	0	0	5	5	13	16	11	13	11	11	2	3	0	0	5	5	25.6	25.6
Q99J62	Q99J62	18	18	18	Replication factor C subunit 4	Rfc4	sp|Q99J62|RFC4_MOUSE Replication factor C subunit 4 OS=Mus musculus GN=Rfc4 PE=1 SV=1	1	18	18	18	15	15	10	14	12	15	10	14	11	8	11	12	15	15	10	14	12	15	10	14	11	8	11	12	15	15	10	14	12	15	10	14	11	8	11	12	52.7	52.7
Q99KG3	Q99KG3	18	18	18	RNA-binding protein 10	Rbm10	sp|Q99KG3|RBM10_MOUSE RNA-binding protein 10 OS=Mus musculus GN=Rbm10 PE=1 SV=1	1	18	18	18	15	16	14	15	16	16	12	12	9	7	9	12	15	16	14	15	16	16	12	12	9	7	9	12	15	16	14	15	16	16	12	12	9	7	9	12	30	30
Q99KP6	Q99KP6	18	18	18	Pre-mRNA-processing factor 19	Prpf19	sp|Q99KP6|PRP19_MOUSE Pre-mRNA-processing factor 19 OS=Mus musculus GN=Prpf19 PE=1 SV=1	1	18	18	18	16	16	16	16	18	16	14	11	9	8	14	14	16	16	16	16	18	16	14	11	9	8	14	14	16	16	16	16	18	16	14	11	9	8	14	14	61.9	61.9
Q99KQ4	Q99KQ4	18	18	18	Nicotinamide phosphoribosyltransferase	Nampt	sp|Q99KQ4|NAMPT_MOUSE Nicotinamide phosphoribosyltransferase OS=Mus musculus GN=Nampt PE=1 SV=1	1	18	18	18	12	15	17	14	16	15	7	7	7	4	9	7	12	15	17	14	16	15	7	7	7	4	9	7	12	15	17	14	16	15	7	7	7	4	9	7	42.4	42.4
Q99LC5	Q99LC5	18	18	18	Electron transfer flavoprotein subunit alpha, mitochondrial	Etfa	sp|Q99LC5|ETFA_MOUSE Electron transfer flavoprotein subunit alpha, mitochondrial OS=Mus musculus GN=Etfa PE=1 SV=2	1	18	18	18	17	17	15	16	16	17	12	10	8	9	6	6	17	17	15	16	16	17	12	10	8	9	6	6	17	17	15	16	16	17	12	10	8	9	6	6	72.1	72.1
Q9CVB6	Q9CVB6	18	18	18	Actin-related protein 2/3 complex subunit 2	Arpc2	sp|Q9CVB6|ARPC2_MOUSE Actin-related protein 2/3 complex subunit 2 OS=Mus musculus GN=Arpc2 PE=1 SV=3	1	18	18	18	13	15	16	14	15	16	5	6	2	1	6	5	13	15	16	14	15	16	5	6	2	1	6	5	13	15	16	14	15	16	5	6	2	1	6	5	67.7	67.7
Q9CZM2	Q9CZM2	18	18	18	60S ribosomal protein L15	Rpl15	sp|Q9CZM2|RL15_MOUSE 60S ribosomal protein L15 OS=Mus musculus GN=Rpl15 PE=2 SV=4	1	18	18	18	15	15	15	16	14	15	11	9	11	9	11	11	15	15	15	16	14	15	11	9	11	9	11	11	15	15	15	16	14	15	11	9	11	9	11	11	54.4	54.4
Q9CZW5	Q9CZW5	18	18	18	Mitochondrial import receptor subunit TOM70	Tomm70a	sp|Q9CZW5|TOM70_MOUSE Mitochondrial import receptor subunit TOM70 OS=Mus musculus GN=Tomm70 PE=1 SV=2	1	18	18	18	16	13	15	15	14	14	7	9	5	5	9	8	16	13	15	15	14	14	7	9	5	5	9	8	16	13	15	15	14	14	7	9	5	5	9	8	37.8	37.8
Q9CZX8	Q9CZX8	18	18	18	40S ribosomal protein S19	Rps19	sp|Q9CZX8|RS19_MOUSE 40S ribosomal protein S19 OS=Mus musculus GN=Rps19 PE=1 SV=3	1	18	18	18	17	18	14	17	17	16	8	11	6	8	11	11	17	18	14	17	17	16	8	11	6	8	11	11	17	18	14	17	17	16	8	11	6	8	11	11	66.9	66.9
Q9D7G0	Q9D7G0	18	18	9	Ribose-phosphate pyrophosphokinase 1	Prps1	sp|Q9D7G0|PRPS1_MOUSE Ribose-phosphate pyrophosphokinase 1 OS=Mus musculus GN=Prps1 PE=1 SV=4	1	18	18	9	14	16	14	12	15	13	10	8	6	7	9	10	14	16	14	12	15	13	10	8	6	7	9	10	7	9	8	6	8	7	5	3	4	3	5	6	57.5	57.5
Q9D906	Q9D906	18	18	18	Ubiquitin-like modifier-activating enzyme ATG7	Atg7	sp|Q9D906|ATG7_MOUSE Ubiquitin-like modifier-activating enzyme ATG7 OS=Mus musculus GN=Atg7 PE=1 SV=1	1	18	18	18	16	15	14	16	15	13	5	6	3	3	8	4	16	15	14	16	15	13	5	6	3	3	8	4	16	15	14	16	15	13	5	6	3	3	8	4	34.8	34.8
Q9DBG7	Q9DBG7	18	18	18	Signal recognition particle receptor subunit alpha	Srpr	sp|Q9DBG7|SRPRA_MOUSE Signal recognition particle receptor subunit alpha OS=Mus musculus GN=Srpra PE=1 SV=1	1	18	18	18	14	14	12	14	15	12	4	4	5	3	7	8	14	14	12	14	15	12	4	4	5	3	7	8	14	14	12	14	15	12	4	4	5	3	7	8	35.1	35.1
Q9EQQ9	Q9EQQ9	18	18	18	Protein O-GlcNAcase	Mgea5	sp|Q9EQQ9|OGA_MOUSE Protein O-GlcNAcase OS=Mus musculus GN=Mgea5 PE=1 SV=2	1	18	18	18	13	15	14	14	15	16	6	6	6	6	8	9	13	15	14	14	15	16	6	6	6	6	8	9	13	15	14	14	15	16	6	6	6	6	8	9	25.5	25.5
Q9JI11	Q9JI11	18	18	12	Serine/threonine-protein kinase 4;Serine/threonine-protein kinase 4 37kDa subunit;Serine/threonine-protein kinase 4 18kDa subunit	Stk4	sp|Q9JI11|STK4_MOUSE Serine/threonine-protein kinase 4 OS=Mus musculus GN=Stk4 PE=1 SV=1	1	18	18	12	17	14	13	16	17	15	8	9	7	9	10	10	17	14	13	16	17	15	8	9	7	9	10	10	11	8	7	10	11	9	6	5	4	6	7	5	44.8	44.8
Q9QUJ7	Q9QUJ7	18	18	17	Long-chain-fatty-acid--CoA ligase 4	Acsl4	sp|Q9QUJ7|ACSL4_MOUSE Long-chain-fatty-acid--CoA ligase 4 OS=Mus musculus GN=Acsl4 PE=1 SV=2	1	18	18	17	15	17	15	12	15	14	8	6	4	3	6	8	15	17	15	12	15	14	8	6	4	3	6	8	14	16	14	11	14	13	7	5	3	3	5	8	32.5	32.5
Q9QWF0	Q9QWF0	18	18	18	Chromatin assembly factor 1 subunit A	Chaf1a	sp|Q9QWF0|CAF1A_MOUSE Chromatin assembly factor 1 subunit A OS=Mus musculus GN=Chaf1a PE=1 SV=1	1	18	18	18	18	17	15	17	15	16	5	7	5	4	6	7	18	17	15	17	15	16	5	7	5	4	6	7	18	17	15	17	15	16	5	7	5	4	6	7	30	30
Q9QXL1;B7ZNG0;Q7M6Z4	Q9QXL1	18;1;1	18;1;1	17;0;0	Kinesin-like protein KIF21B	Kif21b	sp|Q9QXL1|KI21B_MOUSE Kinesin-like protein KIF21B OS=Mus musculus GN=Kif21b PE=1 SV=2	3	18	18	17	15	13	13	13	16	14	7	5	6	5	7	7	15	13	13	13	16	14	7	5	6	5	7	7	14	12	12	12	15	13	7	5	6	5	7	7	15.2	15.2
Q9QYC0	Q9QYC0	18	18	17	Alpha-adducin	Add1	sp|Q9QYC0|ADDA_MOUSE Alpha-adducin OS=Mus musculus GN=Add1 PE=1 SV=2	1	18	18	17	17	15	11	16	13	11	7	6	3	6	8	2	17	15	11	16	13	11	7	6	3	6	8	2	16	14	10	15	12	10	6	5	2	5	7	1	34.3	34.3
Q9R020	Q9R020	18	18	18	Zinc finger Ran-binding domain-containing protein 2	Zranb2	sp|Q9R020|ZRAB2_MOUSE Zinc finger Ran-binding domain-containing protein 2 OS=Mus musculus GN=Zranb2 PE=1 SV=2	1	18	18	18	14	15	14	15	16	15	10	12	13	13	14	13	14	15	14	15	16	15	10	12	13	13	14	13	14	15	14	15	16	15	10	12	13	13	14	13	42.7	42.7
Q9WTP6	Q9WTP6	18	18	18	Adenylate kinase 2, mitochondrial;Adenylate kinase 2, mitochondrial, N-terminally processed	Ak2	sp|Q9WTP6|KAD2_MOUSE Adenylate kinase 2, mitochondrial OS=Mus musculus GN=Ak2 PE=1 SV=5	1	18	18	18	16	16	17	15	15	15	6	4	4	2	5	5	16	16	17	15	15	15	6	4	4	2	5	5	16	16	17	15	15	15	6	4	4	2	5	5	75.7	75.7
Q9Z1T1;Q9JME5	Q9Z1T1	18;1	18;1	18;1	AP-3 complex subunit beta-1	Ap3b1	sp|Q9Z1T1|AP3B1_MOUSE AP-3 complex subunit beta-1 OS=Mus musculus GN=Ap3b1 PE=1 SV=2	2	18	18	18	13	15	16	15	13	15	11	11	7	10	10	9	13	15	16	15	13	15	11	11	7	10	10	9	13	15	16	15	13	15	11	11	7	10	10	9	18.6	18.6
Q9Z2I8	Q9Z2I8	18	18	18	Succinyl-CoA ligase [GDP-forming] subunit beta, mitochondrial	Suclg2	sp|Q9Z2I8|SUCB2_MOUSE Succinate--CoA ligase [GDP-forming] subunit beta, mitochondrial OS=Mus musculus GN=Suclg2 PE=1 SV=3	1	18	18	18	15	15	15	18	16	16	9	8	10	6	8	8	15	15	15	18	16	16	9	8	10	6	8	8	15	15	15	18	16	16	9	8	10	6	8	8	43.2	43.2
A3KGV1	A3KGV1	17	17	17	Outer dense fiber protein 2	Odf2	sp|A3KGV1|ODFP2_MOUSE Outer dense fiber protein 2 OS=Mus musculus GN=Odf2 PE=1 SV=1	1	17	17	17	14	12	10	14	14	14	13	10	7	9	8	10	14	12	10	14	14	14	13	10	7	9	8	10	14	12	10	14	14	14	13	10	7	9	8	10	24.9	24.9
A6H8H2	A6H8H2	17	17	17	DENN domain-containing protein 4C	Dennd4c	sp|A6H8H2|DEN4C_MOUSE DENN domain-containing protein 4C OS=Mus musculus GN=Dennd4c PE=1 SV=1	1	17	17	17	13	15	13	16	14	14	5	6	1	4	8	7	13	15	13	16	14	14	5	6	1	4	8	7	13	15	13	16	14	14	5	6	1	4	8	7	11.6	11.6
E9PZJ8	E9PZJ8	17	17	17	Activating signal cointegrator 1 complex subunit 3	Ascc3	sp|E9PZJ8|ASCC3_MOUSE Activating signal cointegrator 1 complex subunit 3 OS=Mus musculus GN=Ascc3 PE=1 SV=1	1	17	17	17	12	13	13	14	10	13	7	6	5	5	6	6	12	13	13	14	10	13	7	6	5	5	6	6	12	13	13	14	10	13	7	6	5	5	6	6	11.2	11.2
E9Q555	E9Q555	17	17	17	E3 ubiquitin-protein ligase RNF213	Rnf213	sp|E9Q555|RN213_MOUSE E3 ubiquitin-protein ligase RNF213 OS=Mus musculus GN=Rnf213 PE=1 SV=2	1	17	17	17	12	13	7	10	6	4	2	4	2	2	2	3	12	13	7	10	6	4	2	4	2	2	2	3	12	13	7	10	6	4	2	4	2	2	2	3	3.8	3.8
O08795	O08795	17	17	17	Glucosidase 2 subunit beta	Prkcsh	sp|O08795|GLU2B_MOUSE Glucosidase 2 subunit beta OS=Mus musculus GN=Prkcsh PE=1 SV=1	1	17	17	17	16	16	14	15	16	15	2	1	2	3	1	1	16	16	14	15	16	15	2	1	2	3	1	1	16	16	14	15	16	15	2	1	2	3	1	1	36.5	36.5
O35737	O35737	20	17	10	Heterogeneous nuclear ribonucleoprotein H;Heterogeneous nuclear ribonucleoprotein H, N-terminally processed	Hnrnph1	sp|O35737|HNRH1_MOUSE Heterogeneous nuclear ribonucleoprotein H OS=Mus musculus GN=Hnrnph1 PE=1 SV=3	1	20	17	10	20	18	17	19	17	17	16	15	13	13	16	17	17	15	14	16	14	14	13	12	11	10	13	14	10	8	8	10	8	8	7	6	6	6	6	7	57.7	51.7
O35857	O35857	17	17	17	Mitochondrial import inner membrane translocase subunit TIM44	Timm44	sp|O35857|TIM44_MOUSE Mitochondrial import inner membrane translocase subunit TIM44 OS=Mus musculus GN=Timm44 PE=1 SV=2	1	17	17	17	14	16	13	15	13	13	10	4	6	5	9	9	14	16	13	15	13	13	10	4	6	5	9	9	14	16	13	15	13	13	10	4	6	5	9	9	38.1	38.1
O54833	O54833	17	17	17	Casein kinase II subunit alpha	Csnk2a2	sp|O54833|CSK22_MOUSE Casein kinase II subunit alpha OS=Mus musculus GN=Csnk2a2 PE=1 SV=1	1	17	17	17	11	13	16	12	13	14	5	4	4	5	5	5	11	13	16	12	13	14	5	4	4	5	5	5	11	13	16	12	13	14	5	4	4	5	5	5	52.9	52.9
O55222	O55222	17	17	17	Integrin-linked protein kinase	Ilk	sp|O55222|ILK_MOUSE Integrin-linked protein kinase OS=Mus musculus GN=Ilk PE=1 SV=2	1	17	17	17	13	14	10	12	13	15	4	3	5	4	7	6	13	14	10	12	13	15	4	3	5	4	7	6	13	14	10	12	13	15	4	3	5	4	7	6	40.3	40.3
O70252	O70252	17	17	17	Heme oxygenase 2	Hmox2	sp|O70252|HMOX2_MOUSE Heme oxygenase 2 OS=Mus musculus GN=Hmox2 PE=1 SV=1	1	17	17	17	15	15	14	16	15	13	8	7	6	4	7	6	15	15	14	16	15	13	8	7	6	4	7	6	15	15	14	16	15	13	8	7	6	4	7	6	63.8	63.8
O88487	O88487	17	17	17	Cytoplasmic dynein 1 intermediate chain 2	Dync1i2	sp|O88487|DC1I2_MOUSE Cytoplasmic dynein 1 intermediate chain 2 OS=Mus musculus GN=Dync1i2 PE=1 SV=1	1	17	17	17	13	12	11	11	13	13	6	7	4	3	11	10	13	12	11	11	13	13	6	7	4	3	11	10	13	12	11	11	13	13	6	7	4	3	11	10	39.9	39.9
P0DP28;P0DP27;P0DP26;P20801	P0DP28;P0DP27;P0DP26	17;17;17;1	17;17;17;1	10;10;10;1			sp|P0DP28|CALM3_MOUSE Calmodulin-3 OS=Mus musculus GN=Calm3 PE=1 SV=1;sp|P0DP27|CALM2_MOUSE Calmodulin-2 OS=Mus musculus GN=Calm2 PE=1 SV=1;sp|P0DP26|CALM1_MOUSE Calmodulin-1 OS=Mus musculus GN=Calm1 PE=1 SV=1	4	17	17	10	15	17	14	15	14	14	12	9	10	12	12	13	15	17	14	15	14	14	12	9	10	12	12	13	8	10	8	8	7	7	5	5	6	7	6	6	98.7	98.7
P19973	P19973	17	17	17	Lymphocyte-specific protein 1	Lsp1	sp|P19973|LSP1_MOUSE Lymphocyte-specific protein 1 OS=Mus musculus GN=Lsp1 PE=1 SV=2	1	17	17	17	14	16	12	14	11	12	3	3	1	2	3	3	14	16	12	14	11	12	3	3	1	2	3	3	14	16	12	14	11	12	3	3	1	2	3	3	64.8	64.8
P22682	P22682	17	17	16	E3 ubiquitin-protein ligase CBL	Cbl	sp|P22682|CBL_MOUSE E3 ubiquitin-protein ligase CBL OS=Mus musculus GN=Cbl PE=1 SV=3	1	17	17	16	11	11	9	14	14	12	3	5	2	3	3	5	11	11	9	14	14	12	3	5	2	3	3	5	10	10	8	13	13	11	3	4	2	3	3	5	26.1	26.1
P23475	P23475	17	17	17	X-ray repair cross-complementing protein 6	Xrcc6	sp|P23475|XRCC6_MOUSE X-ray repair cross-complementing protein 6 OS=Mus musculus GN=Xrcc6 PE=1 SV=5	1	17	17	17	12	14	13	13	9	9	12	12	11	9	14	14	12	14	13	13	9	9	12	12	11	9	14	14	12	14	13	13	9	9	12	12	11	9	14	14	32.1	32.1
P28867	P28867	17	17	16	Protein kinase C delta type;Protein kinase C delta type regulatory subunit;Protein kinase C delta type catalytic subunit	Prkcd	sp|P28867|KPCD_MOUSE Protein kinase C delta type OS=Mus musculus GN=Prkcd PE=1 SV=3	1	17	17	16	15	15	14	15	12	14	10	9	9	6	11	12	15	15	14	15	12	14	10	9	9	6	11	12	14	14	13	14	11	14	9	8	8	6	11	11	31.8	31.8
P29758	P29758	17	17	17	Ornithine aminotransferase, mitochondrial	Oat	sp|P29758|OAT_MOUSE Ornithine aminotransferase, mitochondrial OS=Mus musculus GN=Oat PE=1 SV=1	1	17	17	17	16	16	16	15	14	15	2	1	2	2	3	2	16	16	16	15	14	15	2	1	2	2	3	2	16	16	16	15	14	15	2	1	2	2	3	2	52.2	52.2
P31230	P31230	17	17	17	Aminoacyl tRNA synthase complex-interacting multifunctional protein 1;Endothelial monocyte-activating polypeptide 2	Aimp1	sp|P31230|AIMP1_MOUSE Aminoacyl tRNA synthase complex-interacting multifunctional protein 1 OS=Mus musculus GN=Aimp1 PE=1 SV=2	1	17	17	17	14	13	15	15	14	15	10	10	8	8	11	12	14	13	15	15	14	15	10	10	8	8	11	12	14	13	15	15	14	15	10	10	8	8	11	12	71.3	71.3
P47856;Q9Z2Z9	P47856	17;5	17;5	17;5	Glutamine--fructose-6-phosphate aminotransferase [isomerizing] 1	Gfpt1	sp|P47856|GFPT1_MOUSE Glutamine--fructose-6-phosphate aminotransferase [isomerizing] 1 OS=Mus musculus GN=Gfpt1 PE=1 SV=3	2	17	17	17	16	14	15	16	15	13	6	8	9	8	11	9	16	14	15	16	15	13	6	8	9	8	11	9	16	14	15	16	15	13	6	8	9	8	11	9	29.4	29.4
P51174	P51174	17	17	17	Long-chain specific acyl-CoA dehydrogenase, mitochondrial	Acadl	sp|P51174|ACADL_MOUSE Long-chain specific acyl-CoA dehydrogenase, mitochondrial OS=Mus musculus GN=Acadl PE=1 SV=2	1	17	17	17	16	15	13	15	15	15	7	7	6	4	2	7	16	15	13	15	15	15	7	7	6	4	2	7	16	15	13	15	15	15	7	7	6	4	2	7	40.7	40.7
P57080	P57080	17	17	17	Ubiquitin carboxyl-terminal hydrolase 25	Usp25	sp|P57080|UBP25_MOUSE Ubiquitin carboxyl-terminal hydrolase 25 OS=Mus musculus GN=Usp25 PE=1 SV=2	1	17	17	17	15	14	11	10	9	11	6	6	5	3	7	10	15	14	11	10	9	11	6	6	5	3	7	10	15	14	11	10	9	11	6	6	5	3	7	10	18.7	18.7
P61202	P61202	17	17	17	COP9 signalosome complex subunit 2	Cops2	sp|P61202|CSN2_MOUSE COP9 signalosome complex subunit 2 OS=Mus musculus GN=Cops2 PE=1 SV=1	1	17	17	17	14	15	16	15	14	14	9	8	5	5	12	10	14	15	16	15	14	14	9	8	5	5	12	10	14	15	16	15	14	14	9	8	5	5	12	10	35.7	35.7
P62242	P62242	17	17	17	40S ribosomal protein S8	Rps8	sp|P62242|RS8_MOUSE 40S ribosomal protein S8 OS=Mus musculus GN=Rps8 PE=1 SV=2	1	17	17	17	17	16	16	15	16	16	12	12	9	11	13	13	17	16	16	15	16	16	12	12	9	11	13	13	17	16	16	15	16	16	12	12	9	11	13	13	61.1	61.1
P62827;Q61820	P62827	17;6	17;6	17;6	GTP-binding nuclear protein Ran	Ran	sp|P62827|RAN_MOUSE GTP-binding nuclear protein Ran OS=Mus musculus GN=Ran PE=1 SV=3	2	17	17	17	16	14	16	14	16	16	12	11	8	9	10	10	16	14	16	14	16	16	12	11	8	9	10	10	16	14	16	14	16	16	12	11	8	9	10	10	51.4	51.4
P62880	P62880	17	17	8	Guanine nucleotide-binding protein G(I)/G(S)/G(T) subunit beta-2	Gnb2	sp|P62880|GBB2_MOUSE Guanine nucleotide-binding protein G(I)/G(S)/G(T) subunit beta-2 OS=Mus musculus GN=Gnb2 PE=1 SV=3	1	17	17	8	16	16	14	15	13	15	6	6	3	6	9	8	16	16	14	15	13	15	6	6	3	6	9	8	8	8	7	8	6	7	1	1	1	1	4	2	62.4	62.4
P62918	P62918	17	17	17	60S ribosomal protein L8	Rpl8	sp|P62918|RL8_MOUSE 60S ribosomal protein L8 OS=Mus musculus GN=Rpl8 PE=1 SV=2	1	17	17	17	16	15	15	15	14	15	8	10	5	6	9	7	16	15	15	15	14	15	8	10	5	6	9	7	16	15	15	15	14	15	8	10	5	6	9	7	57.6	57.6
P70302	P70302	17	17	17	Stromal interaction molecule 1	Stim1	sp|P70302|STIM1_MOUSE Stromal interaction molecule 1 OS=Mus musculus GN=Stim1 PE=1 SV=2	1	17	17	17	12	14	10	16	10	10	4	5	4	4	4	5	12	14	10	16	10	10	4	5	4	4	4	5	12	14	10	16	10	10	4	5	4	4	4	5	34.9	34.9
P84228	P84228	17	17	4	Histone H3.2	Hist1h3b	sp|P84228|H32_MOUSE Histone H3.2 OS=Mus musculus GN=Hist1h3b PE=1 SV=2	1	17	17	4	14	16	13	16	14	13	9	9	8	6	8	7	14	16	13	16	14	13	9	9	8	6	8	7	3	3	2	3	3	3	2	3	1	1	2	1	69.1	69.1
P97770	P97770	17	17	17	THUMP domain-containing protein 3	Thumpd3	sp|P97770|THUM3_MOUSE THUMP domain-containing protein 3 OS=Mus musculus GN=Thumpd3 PE=1 SV=1	1	17	17	17	12	15	13	13	12	14	12	9	9	9	13	11	12	15	13	13	12	14	12	9	9	9	13	11	12	15	13	13	12	14	12	9	9	9	13	11	39	39
P97855	P97855	17	17	16	Ras GTPase-activating protein-binding protein 1	G3bp1	sp|P97855|G3BP1_MOUSE Ras GTPase-activating protein-binding protein 1 OS=Mus musculus GN=G3bp1 PE=1 SV=1	1	17	17	16	17	17	15	17	17	17	12	10	8	7	12	10	17	17	15	17	17	17	12	10	8	7	12	10	16	16	14	16	16	16	11	9	8	7	11	10	48.8	48.8
Q02257;Q02248	Q02257	17;2	17;2	17;2	Junction plakoglobin	Jup	sp|Q02257|PLAK_MOUSE Junction plakoglobin OS=Mus musculus GN=Jup PE=1 SV=3	2	17	17	17	0	0	11	8	2	0	12	12	8	10	10	7	0	0	11	8	2	0	12	12	8	10	10	7	0	0	11	8	2	0	12	12	8	10	10	7	27.9	27.9
Q3THK3	Q3THK3	17	17	17	General transcription factor IIF subunit 1	Gtf2f1	sp|Q3THK3|T2FA_MOUSE General transcription factor IIF subunit 1 OS=Mus musculus GN=Gtf2f1 PE=1 SV=2	1	17	17	17	10	11	11	10	10	11	10	9	7	7	9	9	10	11	11	10	10	11	10	9	7	7	9	9	10	11	11	10	10	11	10	9	7	7	9	9	43.5	43.5
Q3TIV5	Q3TIV5	17	17	17	Zinc finger CCCH domain-containing protein 15	Zc3h15	sp|Q3TIV5|ZC3HF_MOUSE Zinc finger CCCH domain-containing protein 15 OS=Mus musculus GN=Zc3h15 PE=1 SV=2	1	17	17	17	15	15	11	15	16	14	3	4	1	4	6	4	15	15	11	15	16	14	3	4	1	4	6	4	15	15	11	15	16	14	3	4	1	4	6	4	39.9	39.9
Q3TW96	Q3TW96	17	17	17	UDP-N-acetylhexosamine pyrophosphorylase-like protein 1	Uap1l1	sp|Q3TW96|UAP1L_MOUSE UDP-N-acetylhexosamine pyrophosphorylase-like protein 1 OS=Mus musculus GN=Uap1l1 PE=1 SV=1	1	17	17	17	14	14	13	12	16	15	7	9	9	6	10	9	14	14	13	12	16	15	7	9	9	6	10	9	14	14	13	12	16	15	7	9	9	6	10	9	39.6	39.6
Q5RJG1	Q5RJG1	17	17	17	Nucleolar protein 10	Nol10	sp|Q5RJG1|NOL10_MOUSE Nucleolar protein 10 OS=Mus musculus GN=Nol10 PE=2 SV=1	1	17	17	17	13	12	13	12	13	13	12	9	13	10	14	13	13	12	13	12	13	13	12	9	13	10	14	13	13	12	13	12	13	13	12	9	13	10	14	13	39	39
Q5U458	Q5U458	17	17	17	DnaJ homolog subfamily C member 11	Dnajc11	sp|Q5U458|DJC11_MOUSE DnaJ homolog subfamily C member 11 OS=Mus musculus GN=Dnajc11 PE=1 SV=2	1	17	17	17	16	16	16	16	16	16	6	7	4	5	3	8	16	16	16	16	16	16	6	7	4	5	3	8	16	16	16	16	16	16	6	7	4	5	3	8	35.8	35.8
Q60737	Q60737	17	17	17	Casein kinase II subunit alpha	Csnk2a1	sp|Q60737|CSK21_MOUSE Casein kinase II subunit alpha OS=Mus musculus GN=Csnk2a1 PE=1 SV=2	1	17	17	17	14	12	16	16	14	14	6	6	4	2	7	5	14	12	16	16	14	14	6	6	4	2	7	5	14	12	16	16	14	14	6	6	4	2	7	5	48.8	48.8
Q60972	Q60972	26	17	17	Histone-binding protein RBBP4	Rbbp4	sp|Q60972|RBBP4_MOUSE Histone-binding protein RBBP4 OS=Mus musculus GN=Rbbp4 PE=1 SV=5	1	26	17	17	24	24	21	23	22	22	18	20	20	17	17	17	16	16	15	16	14	15	13	14	14	11	13	12	16	16	15	16	14	15	13	14	14	11	13	12	79.5	68.5
Q61194	Q61194	17	17	17	Phosphatidylinositol 4-phosphate 3-kinase C2 domain-containing subunit alpha	Pik3c2a	sp|Q61194|P3C2A_MOUSE Phosphatidylinositol 4-phosphate 3-kinase C2 domain-containing subunit alpha OS=Mus musculus GN=Pik3c2a PE=1 SV=2	1	17	17	17	11	10	10	10	15	16	2	2	3	3	5	4	11	10	10	10	15	16	2	2	3	3	5	4	11	10	10	10	15	16	2	2	3	3	5	4	11.6	11.6
Q62376	Q62376	17	17	17	U1 small nuclear ribonucleoprotein 70 kDa	Snrnp70	sp|Q62376|RU17_MOUSE U1 small nuclear ribonucleoprotein 70 kDa OS=Mus musculus GN=Snrnp70 PE=1 SV=2	1	17	17	17	14	15	11	13	15	13	7	9	7	9	10	8	14	15	11	13	15	13	7	9	7	9	10	8	14	15	11	13	15	13	7	9	7	9	10	8	33.3	33.3
Q69ZA1	Q69ZA1	21	17	17	Cyclin-dependent kinase 13	Cdk13	sp|Q69ZA1|CDK13_MOUSE Cyclin-dependent kinase 13 OS=Mus musculus GN=Cdk13 PE=1 SV=3	1	21	17	17	17	16	15	14	13	10	7	5	5	7	9	8	14	13	12	11	11	9	5	4	4	4	7	6	14	13	12	11	11	9	5	4	4	4	7	6	19.8	16.3
Q69ZK0	Q69ZK0	17	17	17	Phosphatidylinositol 3,4,5-trisphosphate-dependent Rac exchanger 1 protein	Prex1	sp|Q69ZK0|PREX1_MOUSE Phosphatidylinositol 3,4,5-trisphosphate-dependent Rac exchanger 1 protein OS=Mus musculus GN=Prex1 PE=1 SV=2	1	17	17	17	10	12	12	9	13	14	2	2	2	0	6	5	10	12	12	9	13	14	2	2	2	0	6	5	10	12	12	9	13	14	2	2	2	0	6	5	13	13
Q6GQT9	Q6GQT9	17	17	17	Nodal modulator 1	Nomo1	sp|Q6GQT9|NOMO1_MOUSE Nodal modulator 1 OS=Mus musculus GN=Nomo1 PE=1 SV=1	1	17	17	17	13	15	12	16	13	14	8	7	6	5	7	6	13	15	12	16	13	14	8	7	6	5	7	6	13	15	12	16	13	14	8	7	6	5	7	6	21.1	21.1
Q6P549	Q6P549	18	17	17	Phosphatidylinositol 3,4,5-trisphosphate 5-phosphatase 2	Inppl1	sp|Q6P549|SHIP2_MOUSE Phosphatidylinositol 3,4,5-trisphosphate 5-phosphatase 2 OS=Mus musculus GN=Inppl1 PE=1 SV=1	1	18	17	17	14	12	12	14	15	16	6	3	5	5	5	6	13	11	11	13	15	16	5	3	4	4	4	5	13	11	11	13	15	16	5	3	4	4	4	5	21.3	20.5
Q6PF93	Q6PF93	17	17	17	Phosphatidylinositol 3-kinase catalytic subunit type 3	Pik3c3	sp|Q6PF93|PK3C3_MOUSE Phosphatidylinositol 3-kinase catalytic subunit type 3 OS=Mus musculus GN=Pik3c3 PE=1 SV=1	1	17	17	17	14	12	13	13	7	9	1	3	3	4	1	3	14	12	13	13	7	9	1	3	3	4	1	3	14	12	13	13	7	9	1	3	3	4	1	3	23	23
Q6PIJ4	Q6PIJ4	17	17	17	Nuclear factor related to kappa-B-binding protein	Nfrkb	sp|Q6PIJ4|NFRKB_MOUSE Nuclear factor related to kappa-B-binding protein OS=Mus musculus GN=Nfrkb PE=1 SV=1	1	17	17	17	10	10	9	9	9	7	7	9	7	6	6	8	10	10	9	9	9	7	7	9	7	6	6	8	10	10	9	9	9	7	7	9	7	6	6	8	16.3	16.3
Q6ZPZ3	Q6ZPZ3	17	17	17	Zinc finger CCCH domain-containing protein 4	Zc3h4	sp|Q6ZPZ3|ZC3H4_MOUSE Zinc finger CCCH domain-containing protein 4 OS=Mus musculus GN=Zc3h4 PE=1 SV=2	1	17	17	17	10	12	9	8	10	12	4	3	0	4	5	4	10	12	9	8	10	12	4	3	0	4	5	4	10	12	9	8	10	12	4	3	0	4	5	4	20.7	20.7
Q6ZQH8	Q6ZQH8	17	17	17	Nucleoporin NUP188 homolog	Nup188	sp|Q6ZQH8|NU188_MOUSE Nucleoporin NUP188 homolog OS=Mus musculus GN=Nup188 PE=1 SV=2	1	17	17	17	13	9	13	13	9	9	4	4	4	3	6	4	13	9	13	13	9	9	4	4	4	3	6	4	13	9	13	13	9	9	4	4	4	3	6	4	12.2	12.2
Q7TSY8	Q7TSY8	17	17	17	Shugoshin-like 2	Sgol2	sp|Q7TSY8|SGO2_MOUSE Shugoshin 2 OS=Mus musculus GN=Sgo2 PE=1 SV=1	1	17	17	17	10	10	8	9	7	9	9	12	7	6	7	6	10	10	8	9	7	9	9	12	7	6	7	6	10	10	8	9	7	9	9	12	7	6	7	6	17	17
Q80UP3	Q80UP3	17	17	17	Diacylglycerol kinase zeta	Dgkz	sp|Q80UP3|DGKZ_MOUSE Diacylglycerol kinase zeta OS=Mus musculus GN=Dgkz PE=1 SV=2	1	17	17	17	12	14	9	12	11	15	7	6	6	5	7	9	12	14	9	12	11	15	7	6	6	5	7	9	12	14	9	12	11	15	7	6	6	5	7	9	26.3	26.3
Q80VI1	Q80VI1	17	17	17	E3 ubiquitin-protein ligase TRIM56	Trim56	sp|Q80VI1|TRI56_MOUSE E3 ubiquitin-protein ligase TRIM56 OS=Mus musculus GN=Trim56 PE=1 SV=1	1	17	17	17	12	13	12	14	14	14	6	7	3	3	8	8	12	13	12	14	14	14	6	7	3	3	8	8	12	13	12	14	14	14	6	7	3	3	8	8	29	29
Q8BHX3	Q8BHX3	17	17	17	Borealin	Cdca8	sp|Q8BHX3|BOREA_MOUSE Borealin OS=Mus musculus GN=Cdca8 PE=1 SV=2	1	17	17	17	16	15	15	14	14	14	15	16	14	13	12	15	16	15	15	14	14	14	15	16	14	13	12	15	16	15	15	14	14	14	15	16	14	13	12	15	62.3	62.3
Q8BMF4	Q8BMF4	17	17	17	Dihydrolipoyllysine-residue acetyltransferase component of pyruvate dehydrogenase complex, mitochondrial	Dlat	sp|Q8BMF4|ODP2_MOUSE Dihydrolipoyllysine-residue acetyltransferase component of pyruvate dehydrogenase complex, mitochondrial OS=Mus musculus GN=Dlat PE=1 SV=2	1	17	17	17	16	16	14	17	13	14	7	8	6	4	4	6	16	16	14	17	13	14	7	8	6	4	4	6	16	16	14	17	13	14	7	8	6	4	4	6	32.1	32.1
Q8BMG7	Q8BMG7	17	17	17	Rab3 GTPase-activating protein non-catalytic subunit	Rab3gap2	sp|Q8BMG7|RBGPR_MOUSE Rab3 GTPase-activating protein non-catalytic subunit OS=Mus musculus GN=Rab3gap2 PE=1 SV=2	1	17	17	17	13	13	11	14	10	10	6	4	2	2	3	5	13	13	11	14	10	10	6	4	2	2	3	5	13	13	11	14	10	10	6	4	2	2	3	5	14.7	14.7
Q8BV49;Q504N7	Q8BV49;Q504N7	17;10	17;10	17;10	Pyrin and HIN domain-containing protein 1;Pyrin and HIN domain-containing protein 1-like	Pyhin1	sp|Q8BV49|IFIX_MOUSE Pyrin and HIN domain-containing protein 1 OS=Mus musculus GN=Pyhin1 PE=1 SV=1;sp|Q504N7|IFIXL_MOUSE Pyrin and HIN domain-containing protein 1-like OS=Mus musculus PE=2 SV=1	2	17	17	17	14	14	12	12	16	15	12	11	10	8	13	12	14	14	12	12	16	15	12	11	10	8	13	12	14	14	12	12	16	15	12	11	10	8	13	12	54	54
Q8BVK9	Q8BVK9	17	17	17	Sp110 nuclear body protein	Sp110	sp|Q8BVK9|SP110_MOUSE Sp110 nuclear body protein OS=Mus musculus GN=Sp110 PE=1 SV=1	1	17	17	17	14	14	14	13	14	14	13	11	10	9	12	12	14	14	14	13	14	14	13	11	10	9	12	12	14	14	14	13	14	14	13	11	10	9	12	12	49	49
Q8BWW4	Q8BWW4	17	17	17	La-related protein 4	Larp4	sp|Q8BWW4|LARP4_MOUSE La-related protein 4 OS=Mus musculus GN=Larp4 PE=1 SV=2	1	17	17	17	15	14	14	14	12	13	8	9	7	6	7	7	15	14	14	14	12	13	8	9	7	6	7	7	15	14	14	14	12	13	8	9	7	6	7	7	29.9	29.9
Q8C1D8	Q8C1D8	17	17	17	Protein IWS1 homolog	Iws1	sp|Q8C1D8|IWS1_MOUSE Protein IWS1 homolog OS=Mus musculus GN=Iws1 PE=1 SV=1	1	17	17	17	13	15	9	12	10	11	3	3	2	0	4	2	13	15	9	12	10	11	3	3	2	0	4	2	13	15	9	12	10	11	3	3	2	0	4	2	26.8	26.8
Q8C4Y3	Q8C4Y3	17	17	17	Negative elongation factor B	Nelfb	sp|Q8C4Y3|NELFB_MOUSE Negative elongation factor B OS=Mus musculus GN=Nelfb PE=1 SV=2	1	17	17	17	13	11	14	12	13	12	6	7	5	3	9	10	13	11	14	12	13	12	6	7	5	3	9	10	13	11	14	12	13	12	6	7	5	3	9	10	36.9	36.9
Q8JZM7	Q8JZM7	17	17	17	Parafibromin	Cdc73	sp|Q8JZM7|CDC73_MOUSE Parafibromin OS=Mus musculus GN=Cdc73 PE=1 SV=1	1	17	17	17	9	9	10	11	12	8	6	4	4	4	6	7	9	9	10	11	12	8	6	4	4	4	6	7	9	9	10	11	12	8	6	4	4	4	6	7	34.8	34.8
Q8K285	Q8K285	17	17	17	F-BAR domain only protein 1	Fcho1	sp|Q8K285|FCHO1_MOUSE F-BAR domain only protein 1 OS=Mus musculus GN=Fcho1 PE=1 SV=2	1	17	17	17	16	13	10	14	12	14	9	4	2	2	7	5	16	13	10	14	12	14	9	4	2	2	7	5	16	13	10	14	12	14	9	4	2	2	7	5	29.4	29.4
Q8K2H4	Q8K2H4	17	17	17	Arf-GAP with coiled-coil, ANK repeat and PH domain-containing protein 1	Acap1	sp|Q8K2H4|ACAP1_MOUSE Arf-GAP with coiled-coil, ANK repeat and PH domain-containing protein 1 OS=Mus musculus GN=Acap1 PE=1 SV=1	1	17	17	17	11	11	14	14	13	12	9	8	8	6	9	8	11	11	14	14	13	12	9	8	8	6	9	8	11	11	14	14	13	12	9	8	8	6	9	8	33.2	33.2
Q8K2V1	Q8K2V1	17	17	17	Serine/threonine-protein phosphatase 4 regulatory subunit 1	Ppp4r1	sp|Q8K2V1|PP4R1_MOUSE Serine/threonine-protein phosphatase 4 regulatory subunit 1 OS=Mus musculus GN=Ppp4r1 PE=1 SV=2	1	17	17	17	14	11	12	9	13	14	7	6	7	3	7	9	14	11	12	9	13	14	7	6	7	3	7	9	14	11	12	9	13	14	7	6	7	3	7	9	25	25
Q8K4P0	Q8K4P0	17	17	17	pre-mRNA 3 end processing protein WDR33	Wdr33	sp|Q8K4P0|WDR33_MOUSE pre-mRNA 3 end processing protein WDR33 OS=Mus musculus GN=Wdr33 PE=1 SV=1	1	17	17	17	12	12	8	11	8	9	3	4	5	2	2	2	12	12	8	11	8	9	3	4	5	2	2	2	12	12	8	11	8	9	3	4	5	2	2	2	15.4	15.4
Q8R3Y8	Q8R3Y8	17	17	17	Interferon regulatory factor 2-binding protein 1	Irf2bp1	sp|Q8R3Y8|I2BP1_MOUSE Interferon regulatory factor 2-binding protein 1 OS=Mus musculus GN=Irf2bp1 PE=1 SV=2	1	17	17	17	13	15	11	13	15	13	6	5	5	4	4	6	13	15	11	13	15	13	6	5	5	4	4	6	13	15	11	13	15	13	6	5	5	4	4	6	38	38
Q8R4X3	Q8R4X3	17	17	17	RNA-binding protein 12	Rbm12	sp|Q8R4X3|RBM12_MOUSE RNA-binding protein 12 OS=Mus musculus GN=Rbm12 PE=1 SV=3	1	17	17	17	11	14	13	14	14	15	5	4	4	2	7	6	11	14	13	14	14	15	5	4	4	2	7	6	11	14	13	14	14	15	5	4	4	2	7	6	21.7	21.7
Q8VHE0	Q8VHE0	17	17	17	Translocation protein SEC63 homolog	Sec63	sp|Q8VHE0|SEC63_MOUSE Translocation protein SEC63 homolog OS=Mus musculus GN=Sec63 PE=1 SV=4	1	17	17	17	12	10	11	13	13	11	4	5	4	3	7	6	12	10	11	13	13	11	4	5	4	3	7	6	12	10	11	13	13	11	4	5	4	3	7	6	27.1	27.1
Q91VN1	Q91VN1	17	17	15	Zinc finger protein 24	Znf24	sp|Q91VN1|ZNF24_MOUSE Zinc finger protein 24 OS=Mus musculus GN=Znf24 PE=1 SV=1	1	17	17	15	14	15	10	13	13	14	5	2	4	1	6	5	14	15	10	13	13	14	5	2	4	1	6	5	12	13	10	11	11	12	5	2	4	1	6	5	51.6	51.6
Q91WC0	Q91WC0	17	17	17	Histone-lysine N-methyltransferase setd3	Setd3	sp|Q91WC0|SETD3_MOUSE Histone-lysine N-methyltransferase setd3 OS=Mus musculus GN=Setd3 PE=1 SV=1	1	17	17	17	13	14	12	14	11	12	6	8	4	3	6	7	13	14	12	14	11	12	6	8	4	3	6	7	13	14	12	14	11	12	6	8	4	3	6	7	29.8	29.8
Q91WG8	Q91WG8	17	17	17	Bifunctional UDP-N-acetylglucosamine 2-epimerase/N-acetylmannosamine kinase;UDP-N-acetylglucosamine 2-epimerase (hydrolyzing);N-acetylmannosamine kinase	Gne	sp|Q91WG8|GLCNE_MOUSE Bifunctional UDP-N-acetylglucosamine 2-epimerase/N-acetylmannosamine kinase OS=Mus musculus GN=Gne PE=1 SV=1	1	17	17	17	15	13	12	9	15	12	4	5	4	2	4	5	15	13	12	9	15	12	4	5	4	2	4	5	15	13	12	9	15	12	4	5	4	2	4	5	26.6	26.6
Q91YT0	Q91YT0	17	17	17	NADH dehydrogenase [ubiquinone] flavoprotein 1, mitochondrial	Ndufv1	sp|Q91YT0|NDUV1_MOUSE NADH dehydrogenase [ubiquinone] flavoprotein 1, mitochondrial OS=Mus musculus GN=Ndufv1 PE=1 SV=1	1	17	17	17	17	16	14	15	16	15	3	3	4	2	2	2	17	16	14	15	16	15	3	3	4	2	2	2	17	16	14	15	16	15	3	3	4	2	2	2	52.4	52.4
Q91YT7	Q91YT7	17	17	12	YTH domain-containing family protein 2	Ythdf2	sp|Q91YT7|YTHD2_MOUSE YTH domain-containing family protein 2 OS=Mus musculus GN=Ythdf2 PE=1 SV=1	1	17	17	12	15	16	12	15	15	15	15	11	13	8	12	13	15	16	12	15	15	15	15	11	13	8	12	13	10	11	8	10	10	10	10	6	9	5	8	8	35.6	35.6
Q921G7	Q921G7	17	17	17	Electron transfer flavoprotein-ubiquinone oxidoreductase, mitochondrial	Etfdh	sp|Q921G7|ETFD_MOUSE Electron transfer flavoprotein-ubiquinone oxidoreductase, mitochondrial OS=Mus musculus GN=Etfdh PE=1 SV=1	1	17	17	17	12	14	12	10	14	14	0	0	0	0	1	0	12	14	12	10	14	14	0	0	0	0	1	0	12	14	12	10	14	14	0	0	0	0	1	0	34.9	34.9
Q922J9	Q922J9	17	17	17	Fatty acyl-CoA reductase 1	Far1	sp|Q922J9|FACR1_MOUSE Fatty acyl-CoA reductase 1 OS=Mus musculus GN=Far1 PE=1 SV=1	1	17	17	17	14	14	15	16	15	17	11	10	8	8	11	10	14	14	15	16	15	17	11	10	8	8	11	10	14	14	15	16	15	17	11	10	8	8	11	10	37.7	37.7
Q99N69	Q99N69	17	17	17	Leupaxin	Lpxn	sp|Q99N69|LPXN_MOUSE Leupaxin OS=Mus musculus GN=Lpxn PE=1 SV=2	1	17	17	17	14	15	11	15	15	15	7	5	7	6	9	9	14	15	11	15	15	15	7	5	7	6	9	9	14	15	11	15	15	15	7	5	7	6	9	9	63.2	63.2
Q9CPV4	Q9CPV4	17	17	17	Glyoxalase domain-containing protein 4	Glod4	sp|Q9CPV4|GLOD4_MOUSE Glyoxalase domain-containing protein 4 OS=Mus musculus GN=Glod4 PE=1 SV=1	1	17	17	17	13	13	13	15	15	15	9	5	1	4	7	5	13	13	13	15	15	15	9	5	1	4	7	5	13	13	13	15	15	15	9	5	1	4	7	5	64.4	64.4
Q9CS00	Q9CS00	17	17	17	Cactin	Cactin	sp|Q9CS00|CATIN_MOUSE Cactin OS=Mus musculus GN=Cactin PE=1 SV=2	1	17	17	17	11	15	8	12	11	10	9	5	5	7	9	8	11	15	8	12	11	10	9	5	5	7	9	8	11	15	8	12	11	10	9	5	5	7	9	8	29.8	29.8
Q9CX86	Q9CX86	17	17	17	Heterogeneous nuclear ribonucleoprotein A0	Hnrnpa0	sp|Q9CX86|ROA0_MOUSE Heterogeneous nuclear ribonucleoprotein A0 OS=Mus musculus GN=Hnrnpa0 PE=1 SV=1	1	17	17	17	13	15	13	14	12	15	7	10	11	6	8	10	13	15	13	14	12	15	7	10	11	6	8	10	13	15	13	14	12	15	7	10	11	6	8	10	58	58
Q9D154;Q8VHP7;Q5SV42;Q9JK88	Q9D154	17;2;1;1	17;2;1;1	17;2;1;1	Leukocyte elastase inhibitor A	Serpinb1a	sp|Q9D154|ILEUA_MOUSE Leukocyte elastase inhibitor A OS=Mus musculus GN=Serpinb1a PE=1 SV=1	4	17	17	17	16	17	16	16	17	17	4	5	4	3	6	5	16	17	16	16	17	17	4	5	4	3	6	5	16	17	16	16	17	17	4	5	4	3	6	5	44.6	44.6
Q9D2R0	Q9D2R0	17	17	17	Acetoacetyl-CoA synthetase	Aacs	sp|Q9D2R0|AACS_MOUSE Acetoacetyl-CoA synthetase OS=Mus musculus GN=Aacs PE=1 SV=1	1	17	17	17	15	15	14	14	15	16	12	11	5	9	10	9	15	15	14	14	15	16	12	11	5	9	10	9	15	15	14	14	15	16	12	11	5	9	10	9	29.5	29.5
Q9D819	Q9D819	17	17	17	Inorganic pyrophosphatase	Ppa1	sp|Q9D819|IPYR_MOUSE Inorganic pyrophosphatase OS=Mus musculus GN=Ppa1 PE=1 SV=1	1	17	17	17	15	17	16	15	15	15	10	12	7	9	11	11	15	17	16	15	15	15	10	12	7	9	11	11	15	17	16	15	15	15	10	12	7	9	11	11	71.6	71.6
Q9DB77	Q9DB77	17	17	17	Cytochrome b-c1 complex subunit 2, mitochondrial	Uqcrc2	sp|Q9DB77|QCR2_MOUSE Cytochrome b-c1 complex subunit 2, mitochondrial OS=Mus musculus GN=Uqcrc2 PE=1 SV=1	1	17	17	17	17	16	15	16	16	16	10	10	11	8	8	7	17	16	15	16	16	16	10	10	11	8	8	7	17	16	15	16	16	16	10	10	11	8	8	7	52.8	52.8
Q9DBD5	Q9DBD5	17	17	17	Proline-, glutamic acid- and leucine-rich protein 1	Pelp1	sp|Q9DBD5|PELP1_MOUSE Proline-, glutamic acid- and leucine-rich protein 1 OS=Mus musculus GN=Pelp1 PE=1 SV=2	1	17	17	17	14	15	16	16	14	15	9	11	11	10	10	9	14	15	16	16	14	15	9	11	11	10	10	9	14	15	16	16	14	15	9	11	11	10	10	9	22.3	22.3
Q9DBG6	Q9DBG6	17	17	17	Dolichyl-diphosphooligosaccharide--protein glycosyltransferase subunit 2	Rpn2	sp|Q9DBG6|RPN2_MOUSE Dolichyl-diphosphooligosaccharide--protein glycosyltransferase subunit 2 OS=Mus musculus GN=Rpn2 PE=1 SV=1	1	17	17	17	14	12	13	15	15	14	12	12	10	10	8	9	14	12	13	15	15	14	12	12	10	10	8	9	14	12	13	15	15	14	12	12	10	10	8	9	39.8	39.8
Q9DBJ1;O70250	Q9DBJ1	17;6	17;6	17;6	Phosphoglycerate mutase 1	Pgam1	sp|Q9DBJ1|PGAM1_MOUSE Phosphoglycerate mutase 1 OS=Mus musculus GN=Pgam1 PE=1 SV=3	2	17	17	17	14	17	13	13	14	14	9	10	8	3	9	11	14	17	13	13	14	14	9	10	8	3	9	11	14	17	13	13	14	14	9	10	8	3	9	11	64.6	64.6
Q9EPR5	Q9EPR5	17	17	17	VPS10 domain-containing receptor SorCS2	Sorcs2	sp|Q9EPR5|SORC2_MOUSE VPS10 domain-containing receptor SorCS2 OS=Mus musculus GN=Sorcs2 PE=1 SV=2	1	17	17	17	11	13	14	13	16	15	4	6	5	6	8	8	11	13	14	13	16	15	4	6	5	6	8	8	11	13	14	13	16	15	4	6	5	6	8	8	14.8	14.8
Q9EQP2	Q9EQP2	17	17	15	EH domain-containing protein 4	Ehd4	sp|Q9EQP2|EHD4_MOUSE EH domain-containing protein 4 OS=Mus musculus GN=Ehd4 PE=1 SV=1	1	17	17	15	15	15	15	14	13	8	11	12	7	9	9	8	15	15	15	14	13	8	11	12	7	9	9	8	13	13	13	12	11	6	10	11	6	9	8	7	35.3	35.3
Q9JHS4	Q9JHS4	17	17	17	ATP-dependent Clp protease ATP-binding subunit clpX-like, mitochondrial	Clpx	sp|Q9JHS4|CLPX_MOUSE ATP-dependent Clp protease ATP-binding subunit clpX-like, mitochondrial OS=Mus musculus GN=Clpx PE=1 SV=2	1	17	17	17	13	13	12	9	13	14	4	7	6	5	5	4	13	13	12	9	13	14	4	7	6	5	5	4	13	13	12	9	13	14	4	7	6	5	5	4	32.6	32.6
Q9JI78	Q9JI78	17	17	17	Peptide-N(4)-(N-acetyl-beta-glucosaminyl)asparagine amidase	Ngly1	sp|Q9JI78|NGLY1_MOUSE Peptide-N(4)-(N-acetyl-beta-glucosaminyl)asparagine amidase OS=Mus musculus GN=Ngly1 PE=1 SV=2	1	17	17	17	14	14	11	15	10	12	7	8	4	3	5	3	14	14	11	15	10	12	7	8	4	3	5	3	14	14	11	15	10	12	7	8	4	3	5	3	30.9	30.9
Q9JIF0;Q6PAK3	Q9JIF0	17;3	17;3	17;3	Protein arginine N-methyltransferase 1	Prmt1	sp|Q9JIF0|ANM1_MOUSE Protein arginine N-methyltransferase 1 OS=Mus musculus GN=Prmt1 PE=1 SV=1	2	17	17	17	16	12	15	15	15	14	5	5	3	6	8	8	16	12	15	15	15	14	5	5	3	6	8	8	16	12	15	15	15	14	5	5	3	6	8	8	51.8	51.8
Q9JIH2	Q9JIH2	17	17	17	Nuclear pore complex protein Nup50	Nup50	sp|Q9JIH2|NUP50_MOUSE Nuclear pore complex protein Nup50 OS=Mus musculus GN=Nup50 PE=1 SV=3	1	17	17	17	14	17	13	14	13	12	4	4	2	1	6	6	14	17	13	14	13	12	4	4	2	1	6	6	14	17	13	14	13	12	4	4	2	1	6	6	48.3	48.3
Q9QYE3	Q9QYE3	17	17	17	B-cell lymphoma/leukemia 11A	Bcl11a	sp|Q9QYE3|BC11A_MOUSE B-cell lymphoma/leukemia 11A OS=Mus musculus GN=Bcl11a PE=1 SV=1	1	17	17	17	11	10	11	11	9	8	7	4	2	6	3	3	11	10	11	11	9	8	7	4	2	6	3	3	11	10	11	11	9	8	7	4	2	6	3	3	33.5	33.5
Q9QZD9	Q9QZD9	17	17	17	Eukaryotic translation initiation factor 3 subunit I	Eif3i	sp|Q9QZD9|EIF3I_MOUSE Eukaryotic translation initiation factor 3 subunit I OS=Mus musculus GN=Eif3i PE=1 SV=1	1	17	17	17	15	14	13	15	15	16	11	9	9	7	10	10	15	14	13	15	15	16	11	9	9	7	10	10	15	14	13	15	15	16	11	9	9	7	10	10	71.1	71.1
Q9R1T4	Q9R1T4	17	17	9	Septin-6	2006-09-01	sp|Q9R1T4|SEPT6_MOUSE Septin-6 OS=Mus musculus GN=Sept6 PE=1 SV=4	1	17	17	9	17	15	16	17	17	16	12	10	6	7	9	9	17	15	16	17	17	16	12	10	6	7	9	9	9	9	8	9	9	8	8	5	4	4	5	7	47.7	47.7
Q9WUD1	Q9WUD1	17	17	17	STIP1 homology and U box-containing protein 1	Stub1	sp|Q9WUD1|CHIP_MOUSE STIP1 homology and U box-containing protein 1 OS=Mus musculus GN=Stub1 PE=1 SV=1	1	17	17	17	14	16	12	15	12	14	4	3	4	3	6	5	14	16	12	15	12	14	4	3	4	3	6	5	14	16	12	15	12	14	4	3	4	3	6	5	61.8	61.8
Q9WV32	Q9WV32	17	17	16	Actin-related protein 2/3 complex subunit 1B	Arpc1b	sp|Q9WV32|ARC1B_MOUSE Actin-related protein 2/3 complex subunit 1B OS=Mus musculus GN=Arpc1b PE=1 SV=4	1	17	17	16	14	15	15	16	14	14	12	7	6	8	10	8	14	15	15	16	14	14	12	7	6	8	10	8	13	14	14	15	13	13	11	7	6	8	10	8	54.8	54.8
Q9WV80	Q9WV80	19	17	17	Sorting nexin-1	Snx1	sp|Q9WV80|SNX1_MOUSE Sorting nexin-1 OS=Mus musculus GN=Snx1 PE=1 SV=1	1	19	17	17	17	16	19	18	17	17	9	10	8	5	10	8	15	15	17	16	15	15	7	8	7	4	8	6	15	15	17	16	15	15	7	8	7	4	8	6	40.4	36.4
Q9WVA4;Q9R1Q8	Q9WVA4	17;2	17;2	17;2	Transgelin-2	Tagln2	sp|Q9WVA4|TAGL2_MOUSE Transgelin-2 OS=Mus musculus GN=Tagln2 PE=1 SV=4	2	17	17	17	17	16	14	16	15	16	6	8	7	6	11	13	17	16	14	16	15	16	6	8	7	6	11	13	17	16	14	16	15	16	6	8	7	6	11	13	84.4	84.4
Q9Z160	Q9Z160	17	17	17	Conserved oligomeric Golgi complex subunit 1	Cog1	sp|Q9Z160|COG1_MOUSE Conserved oligomeric Golgi complex subunit 1 OS=Mus musculus GN=Cog1 PE=1 SV=3	1	17	17	17	11	13	12	11	14	11	6	3	5	4	6	4	11	13	12	11	14	11	6	3	5	4	6	4	11	13	12	11	14	11	6	3	5	4	6	4	25.8	25.8
Q9Z2N8;Q99MR0	Q9Z2N8	17;4	17;4	17;4	Actin-like protein 6A	Actl6a	sp|Q9Z2N8|ACL6A_MOUSE Actin-like protein 6A OS=Mus musculus GN=Actl6a PE=1 SV=2	2	17	17	17	13	14	13	13	13	11	12	11	9	6	12	10	13	14	13	13	13	11	12	11	9	6	12	10	13	14	13	13	13	11	12	11	9	6	12	10	52.7	52.7
A2BE28	A2BE28	16	16	16	Ribosomal biogenesis protein LAS1L	Las1l	sp|A2BE28|LAS1L_MOUSE Ribosomal biogenesis protein LAS1L OS=Mus musculus GN=Las1l PE=1 SV=1	1	16	16	16	12	11	11	11	13	10	11	10	9	10	10	7	12	11	11	11	13	10	11	10	9	10	10	7	12	11	11	11	13	10	11	10	9	10	10	7	29.8	29.8
B2RR83	B2RR83	16	16	16	Probable ATP-dependent RNA helicase YTHDC2	Ythdc2	sp|B2RR83|YTDC2_MOUSE Probable ATP-dependent RNA helicase YTHDC2 OS=Mus musculus GN=Ythdc2 PE=1 SV=1	1	16	16	16	11	10	10	8	9	8	7	8	5	8	10	9	11	10	10	8	9	8	7	8	5	8	10	9	11	10	10	8	9	8	7	8	5	8	10	9	13.6	13.6
E9Q2Z1	E9Q2Z1	16	16	16		Cecr2	sp|E9Q2Z1|CECR2_MOUSE Cat eye syndrome critical region protein 2 homolog OS=Mus musculus GN=Cecr2 PE=2 SV=1	1	16	16	16	8	5	7	8	9	8	7	4	6	5	7	7	8	5	7	8	9	8	7	4	6	5	7	7	8	5	7	8	9	8	7	4	6	5	7	7	13.6	13.6
O08582	O08582	16	16	16	GTP-binding protein 1	Gtpbp1	sp|O08582|GTPB1_MOUSE GTP-binding protein 1 OS=Mus musculus GN=Gtpbp1 PE=1 SV=2	1	16	16	16	15	14	13	15	15	14	8	7	3	5	8	7	15	14	13	15	15	14	8	7	3	5	8	7	15	14	13	15	15	14	8	7	3	5	8	7	43.7	43.7
O35643	O35643	31	16	16	AP-1 complex subunit beta-1	Ap1b1	sp|O35643|AP1B1_MOUSE AP-1 complex subunit beta-1 OS=Mus musculus GN=Ap1b1 PE=1 SV=2	1	31	16	16	28	23	20	22	23	21	20	14	15	13	17	13	15	13	13	12	13	11	10	6	7	6	9	7	15	13	13	12	13	11	10	6	7	6	9	7	39.4	22.6
O88554	O88554	16	16	16	Poly [ADP-ribose] polymerase 2	Parp2	sp|O88554|PARP2_MOUSE Poly [ADP-ribose] polymerase 2 OS=Mus musculus GN=Parp2 PE=1 SV=3	1	16	16	16	15	14	15	16	14	15	9	9	6	7	7	8	15	14	15	16	14	15	9	9	6	7	7	8	15	14	15	16	14	15	9	9	6	7	7	8	41.7	41.7
O88665	O88665	16	16	16	Bromodomain-containing protein 7	Brd7	sp|O88665|BRD7_MOUSE Bromodomain-containing protein 7 OS=Mus musculus GN=Brd7 PE=1 SV=1	1	16	16	16	11	13	9	11	12	12	7	7	4	2	4	6	11	13	9	11	12	12	7	7	4	2	4	6	11	13	9	11	12	12	7	7	4	2	4	6	36.3	36.3
P09541	P09541	16	16	14	Myosin light chain 4	Myl4	sp|P09541|MYL4_MOUSE Myosin light chain 4 OS=Mus musculus GN=Myl4 PE=1 SV=3	1	16	16	14	15	14	15	15	14	14	13	13	13	13	13	12	15	14	15	15	14	14	13	13	13	13	13	12	13	12	13	13	12	12	11	11	11	11	11	10	88.6	88.6
P11835	P11835	16	16	16	Integrin beta-2	Itgb2	sp|P11835|ITB2_MOUSE Integrin beta-2 OS=Mus musculus GN=Itgb2 PE=1 SV=2	1	16	16	16	11	13	11	13	15	14	5	4	4	3	4	5	11	13	11	13	15	14	5	4	4	3	4	5	11	13	11	13	15	14	5	4	4	3	4	5	26.6	26.6
P23492	P23492	16	16	16	Purine nucleoside phosphorylase	Pnp	sp|P23492|PNPH_MOUSE Purine nucleoside phosphorylase OS=Mus musculus GN=Pnp PE=1 SV=2	1	16	16	16	14	14	14	15	16	15	4	3	7	4	9	8	14	14	14	15	16	15	4	3	7	4	9	8	14	14	14	15	16	15	4	3	7	4	9	8	60.2	60.2
P26450;Q9QZE2;Q64143	P26450	17;1;1	16;0;1	14;0;0	Phosphatidylinositol 3-kinase regulatory subunit alpha	Pik3r1	sp|P26450|P85A_MOUSE Phosphatidylinositol 3-kinase regulatory subunit alpha OS=Mus musculus GN=Pik3r1 PE=1 SV=2	3	17	16	14	12	10	11	13	11	13	3	3	2	4	7	9	11	9	10	12	10	12	2	2	1	3	6	8	10	8	10	11	8	11	2	1	0	2	5	7	29.8	27.9
P28352	P28352	16	16	16	DNA-(apurinic or apyrimidinic site) lyase;DNA-(apurinic or apyrimidinic site) lyase, mitochondrial	Apex1	sp|P28352|APEX1_MOUSE DNA-(apurinic or apyrimidinic site) lyase OS=Mus musculus GN=Apex1 PE=1 SV=2	1	16	16	16	15	15	13	15	15	15	5	7	6	7	9	10	15	15	13	15	15	15	5	7	6	7	9	10	15	15	13	15	15	15	5	7	6	7	9	10	60.6	60.6
P28474;Q64437	P28474	16;1	16;1	16;1	Alcohol dehydrogenase class-3	Adh5	sp|P28474|ADHX_MOUSE Alcohol dehydrogenase class-3 OS=Mus musculus GN=Adh5 PE=1 SV=3	2	16	16	16	13	12	11	13	13	12	8	8	8	7	7	7	13	12	11	13	13	12	8	8	8	7	7	7	13	12	11	13	13	12	8	8	8	7	7	7	53.2	53.2
P35761	P35761	16	16	16	Dual specificity protein kinase TTK	Ttk	sp|P35761|TTK_MOUSE Dual specificity protein kinase TTK OS=Mus musculus GN=Ttk PE=1 SV=1	1	16	16	16	8	8	12	8	11	8	6	6	3	4	4	3	8	8	12	8	11	8	6	6	3	4	4	3	8	8	12	8	11	8	6	6	3	4	4	3	24.4	24.4
P45376	P45376	16	16	16	Aldose reductase	Akr1b1	sp|P45376|ALDR_MOUSE Aldose reductase OS=Mus musculus GN=Akr1b1 PE=1 SV=3	1	16	16	16	16	15	14	14	16	14	10	10	6	4	8	10	16	15	14	14	16	14	10	10	6	4	8	10	16	15	14	14	16	14	10	10	6	4	8	10	51.3	51.3
P47757	P47757	16	16	16	F-actin-capping protein subunit beta	Capzb	sp|P47757|CAPZB_MOUSE F-actin-capping protein subunit beta OS=Mus musculus GN=Capzb PE=1 SV=3	1	16	16	16	14	14	15	16	15	13	7	7	6	10	8	10	14	14	15	16	15	13	7	7	6	10	8	10	14	14	15	16	15	13	7	7	6	10	8	10	59.6	59.6
P48193	P48193	16	16	15	Protein 4.1	Epb41	sp|P48193|41_MOUSE Protein 4.1 OS=Mus musculus GN=Epb41 PE=1 SV=2	1	16	16	15	10	10	12	10	11	12	1	3	1	1	5	3	10	10	12	10	11	12	1	3	1	1	5	3	10	9	12	10	11	12	1	2	1	1	4	2	24.6	24.6
P51859	P51859	17	16	16	Hepatoma-derived growth factor	Hdgf	sp|P51859|HDGF_MOUSE Hepatoma-derived growth factor OS=Mus musculus GN=Hdgf PE=1 SV=2	1	17	16	16	15	14	13	15	13	15	2	2	3	2	5	4	14	14	13	14	12	14	2	2	2	2	5	4	14	14	13	14	12	14	2	2	2	2	5	4	73.8	70.5
P53026	P53026	16	16	16	60S ribosomal protein L10a	Rpl10a	sp|P53026|RL10A_MOUSE 60S ribosomal protein L10a OS=Mus musculus GN=Rpl10a PE=1 SV=3	1	16	16	16	13	16	14	16	15	15	10	11	8	9	9	11	13	16	14	16	15	15	10	11	8	9	9	11	13	16	14	16	15	15	10	11	8	9	9	11	45.2	45.2
P62751	P62751	16	16	16	60S ribosomal protein L23a	Rpl23a	sp|P62751|RL23A_MOUSE 60S ribosomal protein L23a OS=Mus musculus GN=Rpl23a PE=1 SV=1	1	16	16	16	15	14	10	11	13	14	10	10	11	11	11	11	15	14	10	11	13	14	10	10	11	11	11	11	15	14	10	11	13	14	10	10	11	11	11	11	59.6	59.6
P62754	P62754	16	16	16	40S ribosomal protein S6	Rps6	sp|P62754|RS6_MOUSE 40S ribosomal protein S6 OS=Mus musculus GN=Rps6 PE=1 SV=1	1	16	16	16	14	16	10	14	14	14	8	8	8	8	10	9	14	16	10	14	14	14	8	8	8	8	10	9	14	16	10	14	14	14	8	8	8	8	10	9	43.8	43.8
P62915	P62915	16	16	16	Transcription initiation factor IIB	Gtf2b	sp|P62915|TF2B_MOUSE Transcription initiation factor IIB OS=Mus musculus GN=Gtf2b PE=1 SV=1	1	16	16	16	12	12	11	12	13	12	5	5	3	3	6	5	12	12	11	12	13	12	5	5	3	3	6	5	12	12	11	12	13	12	5	5	3	3	6	5	52.8	52.8
P63094;Q6R0H7;Q8CGK7	P63094;Q6R0H7	17;17;4	16;16;3	16;16;3	Guanine nucleotide-binding protein G(s) subunit alpha isoforms short;Guanine nucleotide-binding protein G(s) subunit alpha isoforms XLas	Gnas	sp|P63094|GNAS2_MOUSE Guanine nucleotide-binding protein G(s) subunit alpha isoforms short OS=Mus musculus GN=Gnas PE=1 SV=1;sp|Q6R0H7|GNAS1_MOUSE Guanine nucleotide-binding protein G(s) subunit alpha isoforms XLas OS=Mus musculus GN=Gnas PE=1 SV=1	3	17	16	16	16	14	15	16	16	15	8	8	7	8	8	8	15	13	14	15	15	14	7	7	6	7	7	7	15	13	14	15	15	14	7	7	6	7	7	7	49.2	46.4
P97371	P97371	16	16	15	Proteasome activator complex subunit 1	Psme1	sp|P97371|PSME1_MOUSE Proteasome activator complex subunit 1 OS=Mus musculus GN=Psme1 PE=1 SV=2	1	16	16	15	15	15	14	14	15	15	10	10	7	10	10	12	15	15	14	14	15	15	10	10	7	10	10	12	14	14	14	13	14	14	10	10	7	10	10	12	66.3	66.3
Q00899;Q3TTC2;P22227	Q00899	16;6;1	16;6;1	16;6;1	Transcriptional repressor protein YY1	Yy1	sp|Q00899|TYY1_MOUSE Transcriptional repressor protein YY1 OS=Mus musculus GN=Yy1 PE=1 SV=1	3	16	16	16	13	14	10	14	13	12	10	10	9	7	8	9	13	14	10	14	13	12	10	10	9	7	8	9	13	14	10	14	13	12	10	10	9	7	8	9	42.3	42.3
Q01965	Q01965	16	16	16	T-lymphocyte surface antigen Ly-9	Ly9	sp|Q01965|LY9_MOUSE T-lymphocyte surface antigen Ly-9 OS=Mus musculus GN=Ly9 PE=1 SV=2	1	16	16	16	12	10	12	12	7	8	5	5	2	3	2	0	12	10	12	12	7	8	5	5	2	3	2	0	12	10	12	12	7	8	5	5	2	3	2	0	36.5	36.5
Q0VGB7	Q0VGB7	16	16	16	Serine/threonine-protein phosphatase 4 regulatory subunit 2	Ppp4r2	sp|Q0VGB7|PP4R2_MOUSE Serine/threonine-protein phosphatase 4 regulatory subunit 2 OS=Mus musculus GN=Ppp4r2 PE=1 SV=1	1	16	16	16	14	13	13	14	13	13	4	4	1	1	2	4	14	13	13	14	13	13	4	4	1	1	2	4	14	13	13	14	13	13	4	4	1	1	2	4	55.2	55.2
Q2YDW2	Q2YDW2	16	16	16	Protein misato homolog 1	Msto1	sp|Q2YDW2|MSTO1_MOUSE Protein misato homolog 1 OS=Mus musculus GN=Msto1 PE=1 SV=1	1	16	16	16	16	14	14	15	13	13	5	5	7	5	7	6	16	14	14	15	13	13	5	5	7	5	7	6	16	14	14	15	13	13	5	5	7	5	7	6	39.9	39.9
Q3THG9	Q3THG9	16	16	16	Alanyl-tRNA editing protein Aarsd1	Aarsd1	sp|Q3THG9|AASD1_MOUSE Alanyl-tRNA editing protein Aarsd1 OS=Mus musculus GN=Aarsd1 PE=1 SV=2	1	16	16	16	12	13	12	15	10	12	2	4	3	3	7	4	12	13	12	15	10	12	2	4	3	3	7	4	12	13	12	15	10	12	2	4	3	3	7	4	56.6	56.6
Q3UZ39	Q3UZ39	16	16	15	Leucine-rich repeat flightless-interacting protein 1	Lrrfip1	sp|Q3UZ39|LRRF1_MOUSE Leucine-rich repeat flightless-interacting protein 1 OS=Mus musculus GN=Lrrfip1 PE=1 SV=2	1	16	16	15	13	15	12	13	14	13	2	0	2	1	2	3	13	15	12	13	14	13	2	0	2	1	2	3	12	14	11	12	13	12	2	0	2	1	2	3	35	35
Q3V1L4	Q3V1L4	16	16	16	Cytosolic purine 5-nucleotidase	Nt5c2	sp|Q3V1L4|5NTC_MOUSE Cytosolic purine 5-nucleotidase OS=Mus musculus GN=Nt5c2 PE=1 SV=2	1	16	16	16	12	14	12	15	12	13	3	4	5	5	6	7	12	14	12	15	12	13	3	4	5	5	6	7	12	14	12	15	12	13	3	4	5	5	6	7	40.2	40.2
Q505D1	Q505D1	17	16	16	Serine/threonine-protein phosphatase 6 regulatory ankyrin repeat subunit A	Ankrd28	sp|Q505D1|ANR28_MOUSE Serine/threonine-protein phosphatase 6 regulatory ankyrin repeat subunit A OS=Mus musculus GN=Ankrd28 PE=1 SV=1	1	17	16	16	14	13	11	10	15	15	7	2	3	3	6	6	13	13	10	10	14	14	7	2	3	3	6	6	13	13	10	10	14	14	7	2	3	3	6	6	23	22
Q56A10	Q56A10	16	16	16	Zinc finger protein 608	Znf608	sp|Q56A10|ZN608_MOUSE Zinc finger protein 608 OS=Mus musculus GN=Znf608 PE=1 SV=1	1	16	16	16	12	12	11	11	7	8	5	6	6	6	7	4	12	12	11	11	7	8	5	6	6	6	7	4	12	12	11	11	7	8	5	6	6	6	7	4	13.8	13.8
Q60930	Q60930	16	16	16	Voltage-dependent anion-selective channel protein 2	Vdac2	sp|Q60930|VDAC2_MOUSE Voltage-dependent anion-selective channel protein 2 OS=Mus musculus GN=Vdac2 PE=1 SV=2	1	16	16	16	15	16	14	16	14	15	8	9	8	7	5	3	15	16	14	16	14	15	8	9	8	7	5	3	15	16	14	16	14	15	8	9	8	7	5	3	67.8	67.8
Q62431;A6PWV5	Q62431	16;1	16;1	16;1	AT-rich interactive domain-containing protein 3A	Arid3a	sp|Q62431|ARI3A_MOUSE AT-rich interactive domain-containing protein 3A OS=Mus musculus GN=Arid3a PE=1 SV=1	2	16	16	16	14	11	11	12	14	15	9	7	2	4	5	8	14	11	11	12	14	15	9	7	2	4	5	8	14	11	11	12	14	15	9	7	2	4	5	8	33.6	33.6
Q640N3	Q640N3	16	16	16	Rho GTPase-activating protein 30	Arhgap30	sp|Q640N3|RHG30_MOUSE Rho GTPase-activating protein 30 OS=Mus musculus GN=Arhgap30 PE=1 SV=3	1	16	16	16	11	12	10	13	13	11	6	4	4	3	5	4	11	12	10	13	13	11	6	4	4	3	5	4	11	12	10	13	13	11	6	4	4	3	5	4	17.8	17.8
Q64213	Q64213	16	16	16	Splicing factor 1	Sf1	sp|Q64213|SF01_MOUSE Splicing factor 1 OS=Mus musculus GN=Sf1 PE=1 SV=6	1	16	16	16	13	14	12	12	14	13	6	6	6	6	7	7	13	14	12	12	14	13	6	6	6	6	7	7	13	14	12	12	14	13	6	6	6	6	7	7	30.6	30.6
Q6NVF4	Q6NVF4	16	16	16	DNA helicase B	Helb	sp|Q6NVF4|HELB_MOUSE DNA helicase B OS=Mus musculus GN=Helb PE=1 SV=2	1	16	16	16	11	12	11	12	13	12	4	3	5	4	4	5	11	12	11	12	13	12	4	3	5	4	4	5	11	12	11	12	13	12	4	3	5	4	4	5	21.5	21.5
Q6PCM2	Q6PCM2	16	16	13	Integrator complex subunit 6	Ints6	sp|Q6PCM2|INT6_MOUSE Integrator complex subunit 6 OS=Mus musculus GN=Ints6 PE=1 SV=1	1	16	16	13	14	15	13	12	12	13	4	3	4	3	7	7	14	15	13	12	12	13	4	3	4	3	7	7	12	13	10	9	10	11	4	3	4	3	6	6	21.1	21.1
Q6ZWV3;P86048	Q6ZWV3;P86048	16;12	16;12	16;12	60S ribosomal protein L10;60S ribosomal protein L10-like	Rpl10;Rpl10l	sp|Q6ZWV3|RL10_MOUSE 60S ribosomal protein L10 OS=Mus musculus GN=Rpl10 PE=1 SV=3;sp|P86048|RL10L_MOUSE 60S ribosomal protein L10-like OS=Mus musculus GN=Rpl10l PE=2 SV=1	2	16	16	16	15	15	12	14	12	14	8	9	10	7	11	12	15	15	12	14	12	14	8	9	10	7	11	12	15	15	12	14	12	14	8	9	10	7	11	12	57.5	57.5
Q80TH2	Q80TH2	16	16	15	Protein LAP2	Erbb2ip	sp|Q80TH2|ERBIN_MOUSE Erbin OS=Mus musculus GN=Erbin PE=1 SV=3	1	16	16	15	10	14	7	12	13	12	1	2	0	0	4	3	10	14	7	12	13	12	1	2	0	0	4	3	9	13	6	11	12	11	1	2	0	0	4	3	11.6	11.6
Q80U58	Q80U58	16	16	11	Pumilio homolog 2	Pum2	sp|Q80U58|PUM2_MOUSE Pumilio homolog 2 OS=Mus musculus GN=Pum2 PE=1 SV=2	1	16	16	11	14	15	10	13	15	13	6	6	4	3	6	10	14	15	10	13	15	13	6	6	4	3	6	10	9	10	7	9	10	9	2	3	2	3	3	5	17.6	17.6
Q80UM7	Q80UM7	16	16	16	Mannosyl-oligosaccharide glucosidase	Mogs	sp|Q80UM7|MOGS_MOUSE Mannosyl-oligosaccharide glucosidase OS=Mus musculus GN=Mogs PE=1 SV=1	1	16	16	16	13	14	13	14	15	12	6	4	3	5	6	3	13	14	13	14	15	12	6	4	3	5	6	3	13	14	13	14	15	12	6	4	3	5	6	3	27	27
Q80WT5	Q80WT5	16	16	16	Aftiphilin	Aftph	sp|Q80WT5|AFTIN_MOUSE Aftiphilin OS=Mus musculus GN=Aftph PE=1 SV=2	1	16	16	16	10	12	8	12	8	9	2	1	0	0	2	1	10	12	8	12	8	9	2	1	0	0	2	1	10	12	8	12	8	9	2	1	0	0	2	1	24.8	24.8
Q80Y81	Q80Y81	16	16	16	Zinc phosphodiesterase ELAC protein 2	Elac2	sp|Q80Y81|RNZ2_MOUSE Zinc phosphodiesterase ELAC protein 2 OS=Mus musculus GN=Elac2 PE=1 SV=1	1	16	16	16	12	12	8	11	12	13	1	2	2	0	0	2	12	12	8	11	12	13	1	2	2	0	0	2	12	12	8	11	12	13	1	2	2	0	0	2	28.9	28.9
Q810V0	Q810V0	16	16	16	U3 small nucleolar ribonucleoprotein protein MPP10	Mphosph10	sp|Q810V0|MPP10_MOUSE U3 small nucleolar ribonucleoprotein protein MPP10 OS=Mus musculus GN=Mphosph10 PE=1 SV=2	1	16	16	16	14	11	8	13	13	10	7	7	9	9	9	8	14	11	8	13	13	10	7	7	9	9	9	8	14	11	8	13	13	10	7	7	9	9	9	8	27.6	27.6
Q8BG81	Q8BG81	16	16	16	Polymerase delta-interacting protein 3	Poldip3	sp|Q8BG81|PDIP3_MOUSE Polymerase delta-interacting protein 3 OS=Mus musculus GN=Poldip3 PE=1 SV=1	1	16	16	16	14	14	10	15	12	13	8	5	4	6	7	9	14	14	10	15	12	13	8	5	4	6	7	9	14	14	10	15	12	13	8	5	4	6	7	9	47.4	47.4
Q8BGH2	Q8BGH2	16	16	16	Sorting and assembly machinery component 50 homolog	Samm50	sp|Q8BGH2|SAM50_MOUSE Sorting and assembly machinery component 50 homolog OS=Mus musculus GN=Samm50 PE=1 SV=1	1	16	16	16	11	13	15	12	14	11	11	11	8	7	9	11	11	13	15	12	14	11	11	11	8	7	9	11	11	13	15	12	14	11	11	11	8	7	9	11	43.9	43.9
Q8BIQ5	Q8BIQ5	16	16	10	Cleavage stimulation factor subunit 2	Cstf2	sp|Q8BIQ5|CSTF2_MOUSE Cleavage stimulation factor subunit 2 OS=Mus musculus GN=Cstf2 PE=1 SV=2	1	16	16	10	12	12	10	13	13	15	7	7	8	5	11	9	12	12	10	13	13	15	7	7	8	5	11	9	9	8	7	9	8	10	5	4	4	4	5	5	36.2	36.2
Q8BK35	Q8BK35	16	16	16		Gltscr2	sp|Q8BK35|NOP53_MOUSE Ribosome biogenesis protein NOP53 OS=Mus musculus GN=Nop53 PE=1 SV=1	1	16	16	16	9	10	11	13	10	11	10	10	9	9	8	7	9	10	11	13	10	11	10	10	9	9	8	7	9	10	11	13	10	11	10	10	9	9	8	7	46.1	46.1
Q8BMC4	Q8BMC4	16	16	16	Nucleolar protein 9	Nop9	sp|Q8BMC4|NOP9_MOUSE Nucleolar protein 9 OS=Mus musculus GN=Nop9 PE=1 SV=1	1	16	16	16	10	12	13	12	11	12	8	8	11	9	10	11	10	12	13	12	11	12	8	8	11	9	10	11	10	12	13	12	11	12	8	8	11	9	10	11	36.3	36.3
Q8BMS9	Q8BMS9	16	16	14	Ras association domain-containing protein 2	Rassf2	sp|Q8BMS9|RASF2_MOUSE Ras association domain-containing protein 2 OS=Mus musculus GN=Rassf2 PE=1 SV=1	1	16	16	14	14	12	10	14	10	10	10	8	7	4	7	8	14	12	10	14	10	10	10	8	7	4	7	8	12	11	9	12	8	9	9	7	6	4	6	7	64.1	64.1
Q8BP48	Q8BP48	16	16	16	Methionine aminopeptidase 1	Metap1	sp|Q8BP48|MAP11_MOUSE Methionine aminopeptidase 1 OS=Mus musculus GN=Metap1 PE=1 SV=1	1	16	16	16	14	13	14	16	14	14	4	2	2	2	3	4	14	13	14	16	14	14	4	2	2	2	3	4	14	13	14	16	14	14	4	2	2	2	3	4	57.8	57.8
Q8BP92	Q8BP92	16	16	16	Reticulocalbin-2	Rcn2	sp|Q8BP92|RCN2_MOUSE Reticulocalbin-2 OS=Mus musculus GN=Rcn2 PE=1 SV=1	1	16	16	16	13	13	11	14	12	12	10	10	12	10	12	13	13	13	11	14	12	12	10	10	12	10	12	13	13	13	11	14	12	12	10	10	12	10	12	13	60.9	60.9
Q8BZ03;Q9QUK0;Q8BLF2;Q3UTQ8;Q69ZM6	Q8BZ03	16;1;1;1;1	16;1;1;1;1	12;0;0;0;0	Serine/threonine-protein kinase D2	Prkd2	sp|Q8BZ03|KPCD2_MOUSE Serine/threonine-protein kinase D2 OS=Mus musculus GN=Prkd2 PE=1 SV=1	5	16	16	12	15	15	12	15	16	15	9	8	3	6	6	4	15	15	12	15	16	15	9	8	3	6	6	4	11	11	9	11	12	12	6	6	1	4	3	4	22.1	22.1
Q8C050	Q8C050	16	16	16	Ribosomal protein S6 kinase alpha-5	Rps6ka5	sp|Q8C050|KS6A5_MOUSE Ribosomal protein S6 kinase alpha-5 OS=Mus musculus GN=Rps6ka5 PE=1 SV=2	1	16	16	16	15	14	10	12	13	12	8	8	5	5	10	6	15	14	10	12	13	12	8	8	5	5	10	6	15	14	10	12	13	12	8	8	5	5	10	6	19.5	19.5
Q8C7Q4	Q8C7Q4	16	16	2	RNA-binding protein 4	Rbm4	sp|Q8C7Q4|RBM4_MOUSE RNA-binding protein 4 OS=Mus musculus GN=Rbm4 PE=1 SV=1	1	16	16	2	13	13	13	14	12	12	6	9	8	12	7	9	13	13	13	14	12	12	6	9	8	12	7	9	2	2	2	2	2	2	1	1	0	0	1	1	52.1	52.1
Q8C854	Q8C854	16	16	16	Myelin expression factor 2	Myef2	sp|Q8C854|MYEF2_MOUSE Myelin expression factor 2 OS=Mus musculus GN=Myef2 PE=1 SV=1	1	16	16	16	11	13	8	12	12	15	7	8	4	5	9	10	11	13	8	12	12	15	7	8	4	5	9	10	11	13	8	12	12	15	7	8	4	5	9	10	28.3	28.3
Q8CAS9	Q8CAS9	16	16	16	Poly [ADP-ribose] polymerase 9	Parp9	sp|Q8CAS9|PARP9_MOUSE Poly [ADP-ribose] polymerase 9 OS=Mus musculus GN=Parp9 PE=1 SV=2	1	16	16	16	14	15	14	14	15	15	8	7	7	6	7	6	14	15	14	14	15	15	8	7	7	6	7	6	14	15	14	14	15	15	8	7	7	6	7	6	24.2	24.2
Q8CC88	Q8CC88	16	16	16	von Willebrand factor A domain-containing protein 8	Vwa8	sp|Q8CC88|VWA8_MOUSE von Willebrand factor A domain-containing protein 8 OS=Mus musculus GN=Vwa8 PE=1 SV=2	1	16	16	16	13	9	9	11	13	10	4	5	5	2	2	1	13	9	9	11	13	10	4	5	5	2	2	1	13	9	9	11	13	10	4	5	5	2	2	1	10.1	10.1
Q8CCF0	Q8CCF0	16	16	16	U4/U6 small nuclear ribonucleoprotein Prp31	Prpf31	sp|Q8CCF0|PRP31_MOUSE U4/U6 small nuclear ribonucleoprotein Prp31 OS=Mus musculus GN=Prpf31 PE=1 SV=3	1	16	16	16	12	12	10	14	13	13	12	12	4	11	11	11	12	12	10	14	13	13	12	12	4	11	11	11	12	12	10	14	13	13	12	12	4	11	11	11	44.1	44.1
Q8CCJ3	Q8CCJ3	16	16	16	E3 UFM1-protein ligase 1	Ufl1	sp|Q8CCJ3|UFL1_MOUSE E3 UFM1-protein ligase 1 OS=Mus musculus GN=Ufl1 PE=1 SV=2	1	16	16	16	10	14	9	12	10	12	8	7	4	5	9	4	10	14	9	12	10	12	8	7	4	5	9	4	10	14	9	12	10	12	8	7	4	5	9	4	22.1	22.1
Q8CEE6	Q8CEE6	16	16	16	PAS domain-containing serine/threonine-protein kinase	Pask	sp|Q8CEE6|PASK_MOUSE PAS domain-containing serine/threonine-protein kinase OS=Mus musculus GN=Pask PE=1 SV=3	1	16	16	16	12	11	10	12	9	13	4	3	1	2	6	4	12	11	10	12	9	13	4	3	1	2	6	4	12	11	10	12	9	13	4	3	1	2	6	4	15.5	15.5
Q8CFE2	Q8CFE2	16	16	16	UPF0609 protein C4orf27 homolog		sp|Q8CFE2|HPF1_MOUSE Histone PARylation factor 1 OS=Mus musculus GN=Hpf1 PE=1 SV=1	1	16	16	16	13	14	12	14	11	13	8	9	6	4	8	10	13	14	12	14	11	13	8	9	6	4	8	10	13	14	12	14	11	13	8	9	6	4	8	10	45.4	45.4
Q8CFE3;Q6PGA0	Q8CFE3	16;3	16;3	16;3	REST corepressor 1	Rcor1	sp|Q8CFE3|RCOR1_MOUSE REST corepressor 1 OS=Mus musculus GN=Rcor1 PE=1 SV=3	2	16	16	16	12	10	13	10	13	10	8	8	5	5	8	7	12	10	13	10	13	10	8	8	5	5	8	7	12	10	13	10	13	10	8	8	5	5	8	7	45.8	45.8
Q8K1X4	Q8K1X4	16	16	16		Nckap1l	sp|Q8K1X4|NCKPL_MOUSE Nck-associated protein 1-like OS=Mus musculus GN=Nckap1l PE=1 SV=1	1	16	16	16	11	12	14	12	11	12	7	5	6	6	6	6	11	12	14	12	11	12	7	5	6	6	6	6	11	12	14	12	11	12	7	5	6	6	6	6	15.9	15.9
Q8K268	Q8K268	16	16	16	ATP-binding cassette sub-family F member 3	Abcf3	sp|Q8K268|ABCF3_MOUSE ATP-binding cassette sub-family F member 3 OS=Mus musculus GN=Abcf3 PE=1 SV=1	1	16	16	16	11	14	12	14	13	13	5	7	3	7	5	7	11	14	12	14	13	13	5	7	3	7	5	7	11	14	12	14	13	13	5	7	3	7	5	7	32.3	32.3
Q8K2T8	Q8K2T8	16	16	16	RNA polymerase II-associated factor 1 homolog	Paf1	sp|Q8K2T8|PAF1_MOUSE RNA polymerase II-associated factor 1 homolog OS=Mus musculus GN=Paf1 PE=1 SV=1	1	16	16	16	11	11	12	9	10	9	8	11	8	8	11	11	11	11	12	9	10	9	8	11	8	8	11	11	11	11	12	9	10	9	8	11	8	8	11	11	42.4	42.4
Q8K3H0	Q8K3H0	16	16	16	DCC-interacting protein 13-alpha	Appl1	sp|Q8K3H0|DP13A_MOUSE DCC-interacting protein 13-alpha OS=Mus musculus GN=Appl1 PE=1 SV=1	1	16	16	16	13	12	12	13	13	11	10	6	5	3	9	9	13	12	12	13	13	11	10	6	5	3	9	9	13	12	12	13	13	11	10	6	5	3	9	9	34.1	34.1
Q8K4Q6	Q8K4Q6	16	16	16	Endonuclease 8-like 1	Neil1	sp|Q8K4Q6|NEIL1_MOUSE Endonuclease 8-like 1 OS=Mus musculus GN=Neil1 PE=2 SV=3	1	16	16	16	9	10	5	10	7	7	9	10	9	5	13	9	9	10	5	10	7	7	9	10	9	5	13	9	9	10	5	10	7	7	9	10	9	5	13	9	51.7	51.7
Q8K4R9	Q8K4R9	16	16	16	Disks large-associated protein 5	Dlgap5	sp|Q8K4R9|DLGP5_MOUSE Disks large-associated protein 5 OS=Mus musculus GN=Dlgap5 PE=1 SV=2	1	16	16	16	9	12	7	8	5	4	9	10	6	7	8	7	9	12	7	8	5	4	9	10	6	7	8	7	9	12	7	8	5	4	9	10	6	7	8	7	24.8	24.8
Q8R0A0	Q8R0A0	16	16	16	General transcription factor IIF subunit 2	Gtf2f2	sp|Q8R0A0|T2FB_MOUSE General transcription factor IIF subunit 2 OS=Mus musculus GN=Gtf2f2 PE=1 SV=1	1	16	16	16	11	15	13	12	11	11	13	12	9	11	12	13	11	15	13	12	11	11	13	12	9	11	12	13	11	15	13	12	11	11	13	12	9	11	12	13	71.5	71.5
Q8R0S2;Q5DU25	Q8R0S2	16;1	16;1	15;0	IQ motif and SEC7 domain-containing protein 1	Iqsec1	sp|Q8R0S2|IQEC1_MOUSE IQ motif and SEC7 domain-containing protein 1 OS=Mus musculus GN=Iqsec1 PE=1 SV=2	2	16	16	15	13	14	8	13	13	13	7	6	6	4	7	8	13	14	8	13	13	13	7	6	6	4	7	8	12	13	7	12	12	12	6	6	5	3	6	8	19.6	19.6
Q8R323	Q8R323	16	16	16	Replication factor C subunit 3	Rfc3	sp|Q8R323|RFC3_MOUSE Replication factor C subunit 3 OS=Mus musculus GN=Rfc3 PE=1 SV=1	1	16	16	16	14	15	11	15	14	13	9	11	8	4	9	9	14	15	11	15	14	13	9	11	8	4	9	9	14	15	11	15	14	13	9	11	8	4	9	9	55.3	55.3
Q8VCY6	Q8VCY6	16	16	16	U3 small nucleolar RNA-associated protein 6 homolog	Utp6	sp|Q8VCY6|UTP6_MOUSE U3 small nucleolar RNA-associated protein 6 homolog OS=Mus musculus GN=Utp6 PE=2 SV=1	1	16	16	16	11	12	11	10	10	12	11	10	8	4	10	8	11	12	11	10	10	12	11	10	8	4	10	8	11	12	11	10	10	12	11	10	8	4	10	8	29.5	29.5
Q8VD04	Q8VD04	16	16	16	GRIP1-associated protein 1	Gripap1	sp|Q8VD04|GRAP1_MOUSE GRIP1-associated protein 1 OS=Mus musculus GN=Gripap1 PE=1 SV=1	1	16	16	16	11	11	13	8	12	10	3	0	0	0	3	1	11	11	13	8	12	10	3	0	0	0	3	1	11	11	13	8	12	10	3	0	0	0	3	1	21.1	21.1
Q8VE97	Q8VE97	16	16	12	Serine/arginine-rich splicing factor 4	Srsf4	sp|Q8VE97|SRSF4_MOUSE Serine/arginine-rich splicing factor 4 OS=Mus musculus GN=Srsf4 PE=2 SV=1	1	16	16	12	15	13	13	14	16	14	11	10	9	4	13	10	15	13	13	14	16	14	11	10	9	4	13	10	11	10	9	11	12	10	8	6	6	3	9	7	23.3	23.3
Q8VI84	Q8VI84	16	16	16	Nucleolar complex protein 3 homolog	Noc3l	sp|Q8VI84|NOC3L_MOUSE Nucleolar complex protein 3 homolog OS=Mus musculus GN=Noc3l PE=2 SV=2	1	16	16	16	13	10	9	12	11	11	7	7	8	7	5	6	13	10	9	12	11	11	7	7	8	7	5	6	13	10	9	12	11	11	7	7	8	7	5	6	24.8	24.8
Q91VE6	Q91VE6	16	16	16	MKI67 FHA domain-interacting nucleolar phosphoprotein	Nifk	sp|Q91VE6|MK67I_MOUSE MKI67 FHA domain-interacting nucleolar phosphoprotein OS=Mus musculus GN=Nifk PE=1 SV=1	1	16	16	16	14	14	11	14	13	13	11	12	10	10	13	13	14	14	11	14	13	13	11	12	10	10	13	13	14	14	11	14	13	13	11	12	10	10	13	13	57.1	57.1
Q91VK1	Q91VK1	17	16	16	Basic leucine zipper and W2 domain-containing protein 2	Bzw2	sp|Q91VK1|BZW2_MOUSE Basic leucine zipper and W2 domain-containing protein 2 OS=Mus musculus GN=Bzw2 PE=1 SV=1	1	17	16	16	14	17	11	16	15	15	11	7	8	4	6	9	13	16	10	15	14	14	11	7	8	4	6	9	13	16	10	15	14	14	11	7	8	4	6	9	37.2	35.6
Q91VM9	Q91VM9	16	16	16	Inorganic pyrophosphatase 2, mitochondrial	Ppa2	sp|Q91VM9|IPYR2_MOUSE Inorganic pyrophosphatase 2, mitochondrial OS=Mus musculus GN=Ppa2 PE=1 SV=1	1	16	16	16	13	12	11	12	11	11	0	1	0	0	1	0	13	12	11	12	11	11	0	1	0	0	1	0	13	12	11	12	11	11	0	1	0	0	1	0	61.2	61.2
Q91WK2	Q91WK2	16	16	16	Eukaryotic translation initiation factor 3 subunit H	Eif3h	sp|Q91WK2|EIF3H_MOUSE Eukaryotic translation initiation factor 3 subunit H OS=Mus musculus GN=Eif3h PE=1 SV=1	1	16	16	16	15	15	14	15	13	14	7	9	6	6	7	9	15	15	14	15	13	14	7	9	6	6	7	9	15	15	14	15	13	14	7	9	6	6	7	9	47.7	47.7
Q91YH5	Q91YH5	16	16	15	Atlastin-3	Atl3	sp|Q91YH5|ATLA3_MOUSE Atlastin-3 OS=Mus musculus GN=Atl3 PE=1 SV=1	1	16	16	15	14	15	13	15	14	15	11	10	8	6	10	10	14	15	13	15	14	15	11	10	8	6	10	10	13	14	12	14	13	14	10	9	7	5	9	9	40.5	40.5
Q921M4	Q921M4	16	16	16	Golgin subfamily A member 2	Golga2	sp|Q921M4|GOGA2_MOUSE Golgin subfamily A member 2 OS=Mus musculus GN=Golga2 PE=1 SV=3	1	16	16	16	13	14	9	9	9	11	5	3	5	2	5	7	13	14	9	9	9	11	5	3	5	2	5	7	13	14	9	9	9	11	5	3	5	2	5	7	20.6	20.6
Q921U8	Q921U8	16	16	16	Smoothelin	Smtn	sp|Q921U8|SMTN_MOUSE Smoothelin OS=Mus musculus GN=Smtn PE=1 SV=2	1	16	16	16	8	12	9	10	8	7	7	9	6	5	5	6	8	12	9	10	8	7	7	9	6	5	5	6	8	12	9	10	8	7	7	9	6	5	5	6	21.8	21.8
Q922P9	Q922P9	16	16	16	Putative oxidoreductase GLYR1	Glyr1	sp|Q922P9|GLYR1_MOUSE Putative oxidoreductase GLYR1 OS=Mus musculus GN=Glyr1 PE=1 SV=1	1	16	16	16	12	11	11	12	13	11	9	9	7	8	9	8	12	11	11	12	13	11	9	9	7	8	9	8	12	11	11	12	13	11	9	9	7	8	9	8	36.6	36.6
Q922Q1	Q922Q1	16	16	14	Mitochondrial amidoxime reducing component 2	2002-03-01	sp|Q922Q1|MARC2_MOUSE Mitochondrial amidoxime reducing component 2 OS=Mus musculus GN=Marc2 PE=1 SV=1	1	16	16	14	16	16	13	16	15	15	4	3	2	3	8	8	16	16	13	16	15	15	4	3	2	3	8	8	14	14	12	14	14	13	4	3	2	3	8	8	48.5	48.5
Q922Q2	Q922Q2	16	16	16	Serine/threonine-protein kinase RIO1	Riok1	sp|Q922Q2|RIOK1_MOUSE Serine/threonine-protein kinase RIO1 OS=Mus musculus GN=Riok1 PE=1 SV=2	1	16	16	16	12	12	13	11	11	12	8	7	5	6	8	8	12	12	13	11	11	12	8	7	5	6	8	8	12	12	13	11	11	12	8	7	5	6	8	8	32.1	32.1
Q99J72	Q99J72	16	16	16	DNA dC->dU-editing enzyme APOBEC-3	Apobec3	sp|Q99J72|ABEC3_MOUSE DNA dC->dU-editing enzyme APOBEC-3 OS=Mus musculus GN=Apobec3 PE=1 SV=3	1	16	16	16	6	6	5	6	15	16	2	1	2	4	12	13	6	6	5	6	15	16	2	1	2	4	12	13	6	6	5	6	15	16	2	1	2	4	12	13	34.3	34.3
Q99J77	Q99J77	16	16	16		Nans	sp|Q99J77|SIAS_MOUSE Sialic acid synthase OS=Mus musculus GN=Nans PE=1 SV=1	1	16	16	16	13	12	14	14	12	12	8	9	8	8	7	9	13	12	14	14	12	12	8	9	8	8	7	9	13	12	14	14	12	12	8	9	8	8	7	9	57.7	57.7
Q99MJ9	Q99MJ9	16	16	16	ATP-dependent RNA helicase DDX50	Ddx50	sp|Q99MJ9|DDX50_MOUSE ATP-dependent RNA helicase DDX50 OS=Mus musculus GN=Ddx50 PE=2 SV=1	1	16	16	16	9	11	11	12	11	12	9	10	8	7	9	10	9	11	11	12	11	12	9	10	8	7	9	10	9	11	11	12	11	12	9	10	8	7	9	10	31.7	31.7
Q99P69	Q99P69	16	16	16	Kinetochore protein Nuf2	Nuf2	sp|Q99P69|NUF2_MOUSE Kinetochore protein Nuf2 OS=Mus musculus GN=Nuf2 PE=1 SV=2	1	16	16	16	11	13	9	14	10	10	13	12	11	9	12	11	11	13	9	14	10	10	13	12	11	9	12	11	11	13	9	14	10	10	13	12	11	9	12	11	34.1	34.1
Q9CSN1	Q9CSN1	16	16	16	SNW domain-containing protein 1	Snw1	sp|Q9CSN1|SNW1_MOUSE SNW domain-containing protein 1 OS=Mus musculus GN=Snw1 PE=1 SV=3	1	16	16	16	16	15	14	14	14	13	12	13	12	10	9	11	16	15	14	14	14	13	12	13	12	10	9	11	16	15	14	14	14	13	12	13	12	10	9	11	37.7	37.7
Q9CT10	Q9CT10	16	16	16	Ran-binding protein 3	Ranbp3	sp|Q9CT10|RANB3_MOUSE Ran-binding protein 3 OS=Mus musculus GN=Ranbp3 PE=1 SV=2	1	16	16	16	11	13	10	13	11	11	5	7	6	5	5	6	11	13	10	13	11	11	5	7	6	5	5	6	11	13	10	13	11	11	5	7	6	5	5	6	37.7	37.7
Q9CWL8	Q9CWL8	16	16	16	Beta-catenin-like protein 1	Ctnnbl1	sp|Q9CWL8|CTBL1_MOUSE Beta-catenin-like protein 1 OS=Mus musculus GN=Ctnnbl1 PE=1 SV=1	1	16	16	16	13	14	12	13	14	15	6	7	5	5	9	8	13	14	12	13	14	15	6	7	5	5	9	8	13	14	12	13	14	15	6	7	5	5	9	8	30.7	30.7
Q9CX34	Q9CX34	16	16	16	Suppressor of G2 allele of SKP1 homolog	Sugt1	sp|Q9CX34|SGT1_MOUSE Protein SGT1 homolog OS=Mus musculus GN=Sugt1 PE=1 SV=3	1	16	16	16	13	13	10	13	13	13	4	6	4	4	7	9	13	13	10	13	13	13	4	6	4	4	7	9	13	13	10	13	13	13	4	6	4	4	7	9	50.6	50.6
Q9CXW3	Q9CXW3	16	16	16	Calcyclin-binding protein	Cacybp	sp|Q9CXW3|CYBP_MOUSE Calcyclin-binding protein OS=Mus musculus GN=Cacybp PE=1 SV=1	1	16	16	16	15	13	12	14	13	14	9	9	10	7	9	9	15	13	12	14	13	14	9	9	10	7	9	9	15	13	12	14	13	14	9	9	10	7	9	9	69.9	69.9
Q9CXY6	Q9CXY6	16	16	16	Interleukin enhancer-binding factor 2	Ilf2	sp|Q9CXY6|ILF2_MOUSE Interleukin enhancer-binding factor 2 OS=Mus musculus GN=Ilf2 PE=1 SV=1	1	16	16	16	15	15	13	14	13	15	9	10	8	7	8	5	15	15	13	14	13	15	9	10	8	7	8	5	15	15	13	14	13	15	9	10	8	7	8	5	53.3	53.3
Q9CZ44	Q9CZ44	16	16	16	NSFL1 cofactor p47	Nsfl1c	sp|Q9CZ44|NSF1C_MOUSE NSFL1 cofactor p47 OS=Mus musculus GN=Nsfl1c PE=1 SV=1	1	16	16	16	14	14	13	15	12	13	7	7	5	4	5	6	14	14	13	15	12	13	7	7	5	4	5	6	14	14	13	15	12	13	7	7	5	4	5	6	53	53
Q9CZX0	Q9CZX0	16	16	16	Elongator complex protein 3	Elp3	sp|Q9CZX0|ELP3_MOUSE Elongator complex protein 3 OS=Mus musculus GN=Elp3 PE=1 SV=1	1	16	16	16	13	15	14	15	14	14	7	6	7	4	5	5	13	15	14	15	14	14	7	6	7	4	5	5	13	15	14	15	14	14	7	6	7	4	5	5	34.9	34.9
Q9DBC3	Q9DBC3	16	16	16	Cap-specific mRNA (nucleoside-2-O-)-methyltransferase 1	Cmtr1	sp|Q9DBC3|CMTR1_MOUSE Cap-specific mRNA (nucleoside-2-O-)-methyltransferase 1 OS=Mus musculus GN=Cmtr1 PE=1 SV=1	1	16	16	16	11	14	12	9	10	14	5	2	3	2	3	5	11	14	12	9	10	14	5	2	3	2	3	5	11	14	12	9	10	14	5	2	3	2	3	5	20.8	20.8
Q9DCH4	Q9DCH4	16	16	16	Eukaryotic translation initiation factor 3 subunit F	Eif3f	sp|Q9DCH4|EIF3F_MOUSE Eukaryotic translation initiation factor 3 subunit F OS=Mus musculus GN=Eif3f PE=1 SV=2	1	16	16	16	13	15	13	14	16	16	8	10	9	8	9	9	13	15	13	14	16	16	8	10	9	8	9	9	13	15	13	14	16	16	8	10	9	8	9	9	57.1	57.1
Q9ERS5	Q9ERS5	16	16	16	Pleckstrin homology domain-containing family A member 2	Plekha2	sp|Q9ERS5|PKHA2_MOUSE Pleckstrin homology domain-containing family A member 2 OS=Mus musculus GN=Plekha2 PE=1 SV=1	1	16	16	16	15	13	12	11	14	15	12	9	6	5	11	8	15	13	12	11	14	15	12	9	6	5	11	8	15	13	12	11	14	15	12	9	6	5	11	8	49.6	49.6
Q9ESJ0	Q9ESJ0	16	16	16	Exportin-4	Xpo4	sp|Q9ESJ0|XPO4_MOUSE Exportin-4 OS=Mus musculus GN=Xpo4 PE=1 SV=2	1	16	16	16	10	13	11	10	11	11	2	5	4	3	6	5	10	13	11	10	11	11	2	5	4	3	6	5	10	13	11	10	11	11	2	5	4	3	6	5	17.2	17.2
Q9EST3	Q9EST3	16	16	16	Eukaryotic translation initiation factor 4E transporter	Eif4enif1	sp|Q9EST3|4ET_MOUSE Eukaryotic translation initiation factor 4E transporter OS=Mus musculus GN=Eif4enif1 PE=1 SV=2	1	16	16	16	15	14	12	14	15	15	7	8	4	6	9	6	15	14	12	14	15	15	7	8	4	6	9	6	15	14	12	14	15	15	7	8	4	6	9	6	25	25
Q9ESW4	Q9ESW4	16	16	16	Acylglycerol kinase, mitochondrial	Agk	sp|Q9ESW4|AGK_MOUSE Acylglycerol kinase, mitochondrial OS=Mus musculus GN=Agk PE=1 SV=1	1	16	16	16	12	13	11	12	12	12	7	7	5	3	6	6	12	13	11	12	12	12	7	7	5	3	6	6	12	13	11	12	12	12	7	7	5	3	6	6	46.3	46.3
Q9JHJ0;P49813	Q9JHJ0	16;1	16;1	15;0	Tropomodulin-3	Tmod3	sp|Q9JHJ0|TMOD3_MOUSE Tropomodulin-3 OS=Mus musculus GN=Tmod3 PE=1 SV=1	2	16	16	15	14	12	12	12	13	13	8	11	8	5	9	7	14	12	12	12	13	13	8	11	8	5	9	7	13	11	11	11	12	12	8	11	8	5	9	7	48	48
Q9JK30	Q9JK30	16	16	16	Origin recognition complex subunit 3	Orc3	sp|Q9JK30|ORC3_MOUSE Origin recognition complex subunit 3 OS=Mus musculus GN=Orc3 PE=1 SV=1	1	16	16	16	13	12	13	15	14	13	8	8	9	8	8	6	13	12	13	15	14	13	8	8	9	8	8	6	13	12	13	15	14	13	8	8	9	8	8	6	27	27
Q9QXK3	Q9QXK3	19	16	16	Coatomer subunit gamma-2	Copg2	sp|Q9QXK3|COPG2_MOUSE Coatomer subunit gamma-2 OS=Mus musculus GN=Copg2 PE=1 SV=1	1	19	16	16	18	18	15	15	16	15	12	13	9	8	12	11	15	15	13	13	14	13	10	11	6	5	10	8	15	15	13	13	14	13	10	11	6	5	10	8	28	23.8
Q9WTX6	Q9WTX6	16	16	16	Cullin-1	Cul1	sp|Q9WTX6|CUL1_MOUSE Cullin-1 OS=Mus musculus GN=Cul1 PE=1 SV=1	1	16	16	16	11	12	14	13	13	13	6	5	4	5	5	5	11	12	14	13	13	13	6	5	4	5	5	5	11	12	14	13	13	13	6	5	4	5	5	5	24.4	24.4
Q9WU56	Q9WU56	16	16	16	tRNA pseudouridine synthase A, mitochondrial	Pus1	sp|Q9WU56|TRUA_MOUSE tRNA pseudouridine synthase A OS=Mus musculus GN=Pus1 PE=1 SV=2	1	16	16	16	14	13	14	13	14	14	7	4	4	3	7	4	14	13	14	13	14	14	7	4	4	3	7	4	14	13	14	13	14	14	7	4	4	3	7	4	49.2	49.2
Q9WUP7	Q9WUP7	16	16	16	Ubiquitin carboxyl-terminal hydrolase isozyme L5	Uchl5	sp|Q9WUP7|UCHL5_MOUSE Ubiquitin carboxyl-terminal hydrolase isozyme L5 OS=Mus musculus GN=Uchl5 PE=1 SV=2	1	16	16	16	15	16	14	15	13	15	9	9	9	8	10	7	15	16	14	15	13	15	9	9	9	8	10	7	15	16	14	15	13	15	9	9	9	8	10	7	64.7	64.7
Q9WV70	Q9WV70	16	16	16	Nucleolar complex protein 2 homolog	Noc2l	sp|Q9WV70|NOC2L_MOUSE Nucleolar complex protein 2 homolog OS=Mus musculus GN=Noc2l PE=1 SV=2	1	16	16	16	11	11	11	12	12	10	9	9	10	9	9	8	11	11	11	12	12	10	9	9	10	9	9	8	11	11	11	12	12	10	9	9	10	9	9	8	19.4	19.4
Q9Z179	Q9Z179	16	16	16	SHC SH2 domain-binding protein 1	Shcbp1	sp|Q9Z179|SHCBP_MOUSE SHC SH2 domain-binding protein 1 OS=Mus musculus GN=Shcbp1 PE=1 SV=1	1	16	16	16	13	10	9	11	14	12	9	3	6	5	11	6	13	10	9	11	14	12	9	3	6	5	11	6	13	10	9	11	14	12	9	3	6	5	11	6	28.1	28.1
Q9Z1N2	Q9Z1N2	16	16	16	Origin recognition complex subunit 1	Orc1	sp|Q9Z1N2|ORC1_MOUSE Origin recognition complex subunit 1 OS=Mus musculus GN=Orc1 PE=1 SV=2	1	16	16	16	15	15	14	15	12	13	10	12	12	8	8	11	15	15	14	15	12	13	10	12	12	8	8	11	15	15	14	15	12	13	10	12	12	8	8	11	23.6	23.6
Q9Z2L7	Q9Z2L7	16	16	16	Cytokine receptor-like factor 3	Crlf3	sp|Q9Z2L7|CRLF3_MOUSE Cytokine receptor-like factor 3 OS=Mus musculus GN=Crlf3 PE=1 SV=1	1	16	16	16	15	12	14	11	14	13	7	8	7	4	10	9	15	12	14	11	14	13	7	8	7	4	10	9	15	12	14	11	14	13	7	8	7	4	10	9	48.2	48.2
Q9Z321	Q9Z321	16	16	15	DNA topoisomerase 3-beta-1	Top3b	sp|Q9Z321|TOP3B_MOUSE DNA topoisomerase 3-beta-1 OS=Mus musculus GN=Top3b PE=1 SV=1	1	16	16	15	8	11	7	9	9	13	2	1	0	0	3	5	8	11	7	9	9	13	2	1	0	0	3	5	8	11	7	9	9	13	2	1	0	0	2	4	26.2	26.2
A2A791	A2A791	15	15	15	Zinc finger MYM-type protein 4	Zmym4	sp|A2A791|ZMYM4_MOUSE Zinc finger MYM-type protein 4 OS=Mus musculus GN=Zmym4 PE=1 SV=1	1	15	15	15	10	12	7	9	9	9	7	5	5	5	7	7	10	12	7	9	9	9	7	5	5	5	7	7	10	12	7	9	9	9	7	5	5	5	7	7	12.2	12.2
A2AQ19	A2AQ19	15	15	15	RNA polymerase-associated protein RTF1 homolog	Rtf1	sp|A2AQ19|RTF1_MOUSE RNA polymerase-associated protein RTF1 homolog OS=Mus musculus GN=Rtf1 PE=1 SV=1	1	15	15	15	11	11	11	10	11	8	3	2	3	3	4	1	11	11	11	10	11	8	3	2	3	3	4	1	11	11	11	10	11	8	3	2	3	3	4	1	20.8	20.8
A6PWY4	A6PWY4	15	15	15	WD repeat-containing protein 76	Wdr76	sp|A6PWY4|WDR76_MOUSE WD repeat-containing protein 76 OS=Mus musculus GN=Wdr76 PE=1 SV=1	1	15	15	15	11	10	12	11	9	9	5	6	6	8	3	4	11	10	12	11	9	9	5	6	6	8	3	4	11	10	12	11	9	9	5	6	6	8	3	4	31	31
C0HKD9;C0HKD8	C0HKD9;C0HKD8	15;15	15;15	15;15			sp|C0HKD9|MFA1B_MOUSE Microfibrillar-associated protein 1B OS=Mus musculus GN=Mfap1b PE=1 SV=1;sp|C0HKD8|MFA1A_MOUSE Microfibrillar-associated protein 1A OS=Mus musculus GN=Mfap1a PE=1 SV=1	2	15	15	15	13	12	10	14	9	10	6	8	6	5	8	7	13	12	10	14	9	10	6	8	6	5	8	7	13	12	10	14	9	10	6	8	6	5	8	7	48.5	48.5
E9Q1P8	E9Q1P8	15	15	14	Interferon regulatory factor 2-binding protein 2	Irf2bp2	sp|E9Q1P8|I2BP2_MOUSE Interferon regulatory factor 2-binding protein 2 OS=Mus musculus GN=Irf2bp2 PE=1 SV=1	1	15	15	14	11	12	13	13	14	13	2	2	1	1	3	3	11	12	13	13	14	13	2	2	1	1	3	3	10	11	12	12	13	12	2	2	1	1	3	3	44.9	44.9
O08749	O08749	15	15	15	Dihydrolipoyl dehydrogenase, mitochondrial	Dld	sp|O08749|DLDH_MOUSE Dihydrolipoyl dehydrogenase, mitochondrial OS=Mus musculus GN=Dld PE=1 SV=2	1	15	15	15	10	10	9	10	14	14	1	2	1	2	2	1	10	10	9	10	14	14	1	2	1	2	2	1	10	10	9	10	14	14	1	2	1	2	2	1	40.1	40.1
O54941	O54941	16	15	15	SWI/SNF-related matrix-associated actin-dependent regulator of chromatin subfamily E member 1	Smarce1	sp|O54941|SMCE1_MOUSE SWI/SNF-related matrix-associated actin-dependent regulator of chromatin subfamily E member 1 OS=Mus musculus GN=Smarce1 PE=1 SV=1	1	16	15	15	12	14	11	12	11	11	9	9	9	8	11	9	12	13	11	11	11	11	9	9	8	7	10	8	12	13	11	11	11	11	9	9	8	7	10	8	45	43.3
P01899;P01896	P01899	15;3	15;3	3;0	H-2 class I histocompatibility antigen, D-B alpha chain	H2-D1	sp|P01899|HA11_MOUSE H-2 class I histocompatibility antigen, D-B alpha chain OS=Mus musculus GN=H2-D1 PE=1 SV=2	2	15	15	3	15	15	13	15	14	15	9	7	6	6	12	12	15	15	13	15	14	15	9	7	6	6	12	12	3	3	3	3	3	3	1	1	1	1	2	2	44.8	44.8
P11881	P11881	19	15	15	Inositol 1,4,5-trisphosphate receptor type 1	Itpr1	sp|P11881|ITPR1_MOUSE Inositol 1,4,5-trisphosphate receptor type 1 OS=Mus musculus GN=Itpr1 PE=1 SV=2	1	19	15	15	14	13	11	10	15	17	6	6	2	2	6	7	10	9	7	7	12	13	3	4	0	1	4	4	10	9	7	7	12	13	3	4	0	1	4	4	7.6	6.5
P12265	P12265	15	15	15	Beta-glucuronidase	Gusb	sp|P12265|BGLR_MOUSE Beta-glucuronidase OS=Mus musculus GN=Gusb PE=1 SV=2	1	15	15	15	12	14	13	14	14	13	2	1	1	0	2	1	12	14	13	14	14	13	2	1	1	0	2	1	12	14	13	14	14	13	2	1	1	0	2	1	25.2	25.2
P17225	P17225	18	15	15	Polypyrimidine tract-binding protein 1	Ptbp1	sp|P17225|PTBP1_MOUSE Polypyrimidine tract-binding protein 1 OS=Mus musculus GN=Ptbp1 PE=1 SV=2	1	18	15	15	15	16	14	14	13	12	9	11	12	10	14	13	13	13	13	12	12	12	9	10	11	10	13	12	13	13	13	12	12	12	9	10	11	10	13	12	57.3	51.6
P17742	P17742	15	15	15	Peptidyl-prolyl cis-trans isomerase A;Peptidyl-prolyl cis-trans isomerase A, N-terminally processed	Ppia	sp|P17742|PPIA_MOUSE Peptidyl-prolyl cis-trans isomerase A OS=Mus musculus GN=Ppia PE=1 SV=2	1	15	15	15	15	14	13	14	14	13	11	10	9	10	13	12	15	14	13	14	14	13	11	10	9	10	13	12	15	14	13	14	14	13	11	10	9	10	13	12	81.7	81.7
P18654;Q7TPS0	P18654	23;3	15;1	15;1	Ribosomal protein S6 kinase alpha-3	Rps6ka3	sp|P18654|KS6A3_MOUSE Ribosomal protein S6 kinase alpha-3 OS=Mus musculus GN=Rps6ka3 PE=1 SV=2	2	23	15	15	17	18	16	19	18	19	12	9	13	10	12	13	10	11	10	11	11	13	10	5	9	6	8	10	10	11	10	11	11	13	10	5	9	6	8	10	37	23.9
P23249	P23249	15	15	15	Putative helicase MOV-10	Mov10	sp|P23249|MOV10_MOUSE Putative helicase MOV-10 OS=Mus musculus GN=Mov10 PE=1 SV=2	1	15	15	15	9	13	10	12	9	11	8	7	5	6	5	10	9	13	10	12	9	11	8	7	5	6	5	10	9	13	10	12	9	11	8	7	5	6	5	10	17.7	17.7
P25911;P08103	P25911	15;2	15;2	12;0	Tyrosine-protein kinase Lyn	Lyn	sp|P25911|LYN_MOUSE Tyrosine-protein kinase Lyn OS=Mus musculus GN=Lyn PE=1 SV=4	2	15	15	12	13	13	11	11	14	14	6	7	7	6	7	7	13	13	11	11	14	14	6	7	7	6	7	7	11	10	8	8	11	11	4	5	5	5	4	4	34.6	34.6
P26516	P26516	15	15	15	26S proteasome non-ATPase regulatory subunit 7	Psmd7	sp|P26516|PSMD7_MOUSE 26S proteasome non-ATPase regulatory subunit 7 OS=Mus musculus GN=Psmd7 PE=1 SV=2	1	15	15	15	13	11	11	11	12	12	11	11	10	9	8	9	13	11	11	11	12	12	11	11	10	9	8	9	13	11	11	11	12	12	11	11	10	9	8	9	65.1	65.1
P30681	P30681	18	15	15	High mobility group protein B2	Hmgb2	sp|P30681|HMGB2_MOUSE High mobility group protein B2 OS=Mus musculus GN=Hmgb2 PE=1 SV=3	1	18	15	15	18	16	17	17	17	17	7	9	6	7	6	7	15	13	14	14	14	14	6	8	5	7	5	6	15	13	14	14	14	14	6	8	5	7	5	6	48.1	40.5
P42232	P42232	15	15	5	Signal transducer and activator of transcription 5B	Stat5b	sp|P42232|STA5B_MOUSE Signal transducer and activator of transcription 5B OS=Mus musculus GN=Stat5b PE=1 SV=1	1	15	15	5	13	13	11	10	11	8	6	6	4	6	9	8	13	13	11	10	11	8	6	6	4	6	9	8	5	5	4	4	4	2	2	1	2	2	3	3	21.8	21.8
P52479	P52479	15	15	15	Ubiquitin carboxyl-terminal hydrolase 10	Usp10	sp|P52479|UBP10_MOUSE Ubiquitin carboxyl-terminal hydrolase 10 OS=Mus musculus GN=Usp10 PE=1 SV=3	1	15	15	15	13	12	10	11	15	15	6	7	6	3	7	10	13	12	10	11	15	15	6	7	6	3	7	10	13	12	10	11	15	15	6	7	6	3	7	10	21.3	21.3
P54822	P54822	15	15	15	Adenylosuccinate lyase	Adsl	sp|P54822|PUR8_MOUSE Adenylosuccinate lyase OS=Mus musculus GN=Adsl PE=1 SV=2	1	15	15	15	13	13	14	14	14	13	3	2	3	3	6	4	13	13	14	14	14	13	3	2	3	3	6	4	13	13	14	14	14	13	3	2	3	3	6	4	41.1	41.1
P55264	P55264	15	15	15	Adenosine kinase	Adk	sp|P55264|ADK_MOUSE Adenosine kinase OS=Mus musculus GN=Adk PE=1 SV=2	1	15	15	15	13	14	10	15	15	14	8	7	5	8	8	7	13	14	10	15	15	14	8	7	5	8	8	7	13	14	10	15	15	14	8	7	5	8	8	7	50.1	50.1
P60330	P60330	15	15	15	Separin	Espl1	sp|P60330|ESPL1_MOUSE Separin OS=Mus musculus GN=Espl1 PE=1 SV=1	1	15	15	15	10	7	8	12	9	11	1	2	1	2	5	3	10	7	8	12	9	11	1	2	1	2	5	3	10	7	8	12	9	11	1	2	1	2	5	3	8.5	8.5
P60670	P60670	15	15	15	Nuclear protein localization protein 4 homolog	Nploc4	sp|P60670|NPL4_MOUSE Nuclear protein localization protein 4 homolog OS=Mus musculus GN=Nploc4 PE=1 SV=3	1	15	15	15	14	10	9	12	13	14	5	3	3	3	3	3	14	10	9	12	13	14	5	3	3	3	3	3	14	10	9	12	13	14	5	3	3	3	3	3	40.8	40.8
P60762	P60762	15	15	13	Mortality factor 4-like protein 1	Morf4l1	sp|P60762|MO4L1_MOUSE Mortality factor 4-like protein 1 OS=Mus musculus GN=Morf4l1 PE=1 SV=2	1	15	15	13	10	12	12	13	11	12	8	6	5	6	5	7	10	12	12	13	11	12	8	6	5	6	5	7	9	11	11	11	9	11	6	6	4	6	5	6	42	42
P61290	P61290	15	15	15	Proteasome activator complex subunit 3	Psme3	sp|P61290|PSME3_MOUSE Proteasome activator complex subunit 3 OS=Mus musculus GN=Psme3 PE=1 SV=1	1	15	15	15	15	14	13	15	13	14	5	4	5	3	7	3	15	14	13	15	13	14	5	4	5	3	7	3	15	14	13	15	13	14	5	4	5	3	7	3	59.4	59.4
P62046	P62046	15	15	13	Leucine-rich repeat and calponin homology domain-containing protein 1	Lrch1	sp|P62046|LRCH1_MOUSE Leucine-rich repeat and calponin homology domain-containing protein 1 OS=Mus musculus GN=Lrch1 PE=1 SV=2	1	15	15	13	10	11	7	13	11	12	7	6	5	3	5	5	10	11	7	13	11	12	7	6	5	3	5	5	8	9	6	11	9	10	5	6	4	2	5	5	26.4	26.4
P62270	P62270	15	15	15	40S ribosomal protein S18	Rps18	sp|P62270|RS18_MOUSE 40S ribosomal protein S18 OS=Mus musculus GN=Rps18 PE=1 SV=3	1	15	15	15	14	15	14	14	13	14	10	8	9	8	9	9	14	15	14	14	13	14	10	8	9	8	9	9	14	15	14	14	13	14	10	8	9	8	9	9	55.3	55.3
P62281	P62281	15	15	15	40S ribosomal protein S11	Rps11	sp|P62281|RS11_MOUSE 40S ribosomal protein S11 OS=Mus musculus GN=Rps11 PE=1 SV=3	1	15	15	15	14	13	13	14	14	14	10	11	7	8	10	9	14	13	13	14	14	14	10	11	7	8	10	9	14	13	13	14	14	14	10	11	7	8	10	9	61.4	61.4
P62983	P62983	15	15	7	Ubiquitin-40S ribosomal protein S27a;Ubiquitin;40S ribosomal protein S27a	Rps27a	sp|P62983|RS27A_MOUSE Ubiquitin-40S ribosomal protein S27a OS=Mus musculus GN=Rps27a PE=1 SV=2	1	15	15	7	14	13	13	13	12	13	8	9	7	7	8	8	14	13	13	13	12	13	8	9	7	7	8	8	6	6	5	5	6	6	3	4	2	2	4	3	73.7	73.7
P62996	P62996	15	15	13	Transformer-2 protein homolog beta	Tra2b	sp|P62996|TRA2B_MOUSE Transformer-2 protein homolog beta OS=Mus musculus GN=Tra2b PE=1 SV=1	1	15	15	13	11	11	7	10	11	11	7	6	7	6	6	7	11	11	7	10	11	11	7	6	7	6	6	7	10	10	7	9	10	10	6	5	5	5	4	5	50.3	50.3
P63330	P63330	15	15	2	Serine/threonine-protein phosphatase 2A catalytic subunit alpha isoform	Ppp2ca	sp|P63330|PP2AA_MOUSE Serine/threonine-protein phosphatase 2A catalytic subunit alpha isoform OS=Mus musculus GN=Ppp2ca PE=1 SV=1	1	15	15	2	12	14	11	12	13	15	6	8	8	7	9	12	12	14	11	12	13	15	6	8	8	7	9	12	1	2	1	2	2	2	1	2	2	1	1	1	63.8	63.8
P70372	P70372	15	15	15	ELAV-like protein 1	Elavl1	sp|P70372|ELAV1_MOUSE ELAV-like protein 1 OS=Mus musculus GN=Elavl1 PE=1 SV=2	1	15	15	15	15	15	14	13	15	15	9	8	8	7	10	10	15	15	14	13	15	15	9	8	8	7	10	10	15	15	14	13	15	15	9	8	8	7	10	10	50.3	50.3
P70677	P70677	15	15	15	Caspase-3;Caspase-3 subunit p17;Caspase-3 subunit p12	Casp3	sp|P70677|CASP3_MOUSE Caspase-3 OS=Mus musculus GN=Casp3 PE=1 SV=1	1	15	15	15	12	11	10	10	14	12	2	4	2	5	6	7	12	11	10	10	14	12	2	4	2	5	6	7	12	11	10	10	14	12	2	4	2	5	6	7	68.2	68.2
P84099	P84099	15	15	15	60S ribosomal protein L19	Rpl19	sp|P84099|RL19_MOUSE 60S ribosomal protein L19 OS=Mus musculus GN=Rpl19 PE=1 SV=1	1	15	15	15	12	13	12	12	13	13	6	7	7	7	9	8	12	13	12	12	13	13	6	7	7	7	9	8	12	13	12	12	13	13	6	7	7	7	9	8	43.4	43.4
P97377;Q80YP0	P97377	17;3	15;1	15;1	Cyclin-dependent kinase 2	Cdk2	sp|P97377|CDK2_MOUSE Cyclin-dependent kinase 2 OS=Mus musculus GN=Cdk2 PE=1 SV=2	2	17	15	15	16	15	12	15	14	16	6	7	4	7	7	5	14	13	11	14	13	14	4	5	3	5	6	4	14	13	11	14	13	14	4	5	3	5	6	4	52	46.5
P97379	P97379	16	15	15	Ras GTPase-activating protein-binding protein 2	G3bp2	sp|P97379|G3BP2_MOUSE Ras GTPase-activating protein-binding protein 2 OS=Mus musculus GN=G3bp2 PE=1 SV=2	1	16	15	15	13	12	14	13	14	13	12	9	8	8	8	7	12	11	13	12	13	12	11	8	8	8	7	7	12	11	13	12	13	12	11	8	8	8	7	7	42.1	40.5
Q03267;P81183;Q8C208	Q03267	17;3;2	15;1;1	15;1;1	DNA-binding protein Ikaros	Ikzf1	sp|Q03267|IKZF1_MOUSE DNA-binding protein Ikaros OS=Mus musculus GN=Ikzf1 PE=1 SV=2	3	17	15	15	16	17	13	14	16	16	8	5	9	6	7	7	15	15	11	13	15	14	7	4	8	5	6	6	15	15	11	13	15	14	7	4	8	5	6	6	40.4	37.5
Q07417	Q07417	15	15	15	Short-chain specific acyl-CoA dehydrogenase, mitochondrial	Acads	sp|Q07417|ACADS_MOUSE Short-chain specific acyl-CoA dehydrogenase, mitochondrial OS=Mus musculus GN=Acads PE=1 SV=2	1	15	15	15	11	13	12	12	11	13	2	4	1	3	4	5	11	13	12	12	11	13	2	4	1	3	4	5	11	13	12	12	11	13	2	4	1	3	4	5	52.2	52.2
Q3UGC7;Q66JS6	Q3UGC7;Q66JS6	15;14	15;14	15;14	Eukaryotic translation initiation factor 3 subunit J-A;Eukaryotic translation initiation factor 3 subunit J-B	Eif3j1;Eif3j2	sp|Q3UGC7|EI3JA_MOUSE Eukaryotic translation initiation factor 3 subunit J-A OS=Mus musculus GN=Eif3j1 PE=2 SV=1;sp|Q66JS6|EI3JB_MOUSE Eukaryotic translation initiation factor 3 subunit J-B OS=Mus musculus GN=Eif3j2 PE=1 SV=1	2	15	15	15	11	14	10	14	12	11	4	4	3	3	6	7	11	14	10	14	12	11	4	4	3	3	6	7	11	14	10	14	12	11	4	4	3	3	6	7	68.6	68.6
Q3UJD6	Q3UJD6	15	15	15	Ubiquitin carboxyl-terminal hydrolase 19	Usp19	sp|Q3UJD6|UBP19_MOUSE Ubiquitin carboxyl-terminal hydrolase 19 OS=Mus musculus GN=Usp19 PE=1 SV=1	1	15	15	15	14	9	10	11	13	13	2	0	1	0	6	6	14	9	10	11	13	13	2	0	1	0	6	6	14	9	10	11	13	13	2	0	1	0	6	6	18.5	18.5
Q3UZA1	Q3UZA1	15	15	15	CapZ-interacting protein	Rcsd1	sp|Q3UZA1|CPZIP_MOUSE CapZ-interacting protein OS=Mus musculus GN=Rcsd1 PE=1 SV=1	1	15	15	15	13	14	10	12	10	10	0	0	0	1	1	0	13	14	10	12	10	10	0	0	0	1	1	0	13	14	10	12	10	10	0	0	0	1	1	0	57.3	57.3
Q3V1H1	Q3V1H1	15	15	15	Cytoskeleton-associated protein 2	Ckap2	sp|Q3V1H1|CKAP2_MOUSE Cytoskeleton-associated protein 2 OS=Mus musculus GN=Ckap2 PE=1 SV=1	1	15	15	15	12	12	11	9	11	9	10	9	7	6	8	9	12	12	11	9	11	9	10	9	7	6	8	9	12	12	11	9	11	9	10	9	7	6	8	9	31	31
Q5SV85	Q5SV85	15	15	15	Synergin gamma	Synrg	sp|Q5SV85|SYNRG_MOUSE Synergin gamma OS=Mus musculus GN=Synrg PE=1 SV=1	1	15	15	15	14	13	9	12	8	10	3	1	1	0	1	1	14	13	9	12	8	10	3	1	1	0	1	1	14	13	9	12	8	10	3	1	1	0	1	1	14.5	14.5
Q5SVQ0	Q5SVQ0	15	15	15	Histone acetyltransferase KAT7	Kat7	sp|Q5SVQ0|KAT7_MOUSE Histone acetyltransferase KAT7 OS=Mus musculus GN=Kat7 PE=1 SV=1	1	15	15	15	14	12	10	12	10	11	9	10	8	9	8	8	14	12	10	12	10	11	9	10	8	9	8	8	14	12	10	12	10	11	9	10	8	9	8	8	28.1	28.1
Q61081	Q61081	15	15	15	Hsp90 co-chaperone Cdc37;Hsp90 co-chaperone Cdc37, N-terminally processed	Cdc37	sp|Q61081|CDC37_MOUSE Hsp90 co-chaperone Cdc37 OS=Mus musculus GN=Cdc37 PE=1 SV=1	1	15	15	15	12	15	11	13	12	11	8	7	7	5	6	10	12	15	11	13	12	11	8	7	7	5	6	10	12	15	11	13	12	11	8	7	7	5	6	10	51.2	51.2
Q61599	Q61599	15	15	15	Rho GDP-dissociation inhibitor 2	Arhgdib	sp|Q61599|GDIR2_MOUSE Rho GDP-dissociation inhibitor 2 OS=Mus musculus GN=Arhgdib PE=1 SV=3	1	15	15	15	14	14	13	15	14	13	9	11	12	9	13	11	14	14	13	15	14	13	9	11	12	9	13	11	14	14	13	15	14	13	9	11	12	9	13	11	70.5	70.5
Q61686	Q61686	15	15	14	Chromobox protein homolog 5	Cbx5	sp|Q61686|CBX5_MOUSE Chromobox protein homolog 5 OS=Mus musculus GN=Cbx5 PE=1 SV=1	1	15	15	14	11	12	12	11	11	11	11	11	6	7	12	12	11	12	12	11	11	11	11	11	6	7	12	12	10	11	11	10	10	10	10	10	5	6	11	11	67	67
Q61823	Q61823	15	15	15	Programmed cell death protein 4	Pdcd4	sp|Q61823|PDCD4_MOUSE Programmed cell death protein 4 OS=Mus musculus GN=Pdcd4 PE=1 SV=1	1	15	15	15	15	13	11	12	14	12	6	6	4	3	5	4	15	13	11	12	14	12	6	6	4	3	5	4	15	13	11	12	14	12	6	6	4	3	5	4	51.4	51.4
Q62077	Q62077	15	15	15	1-phosphatidylinositol 4,5-bisphosphate phosphodiesterase gamma-1	Plcg1	sp|Q62077|PLCG1_MOUSE 1-phosphatidylinositol 4,5-bisphosphate phosphodiesterase gamma-1 OS=Mus musculus GN=Plcg1 PE=1 SV=2	1	15	15	15	10	8	9	11	11	12	2	1	1	2	3	3	10	8	9	11	11	12	2	1	1	2	3	3	10	8	9	11	11	12	2	1	1	2	3	3	16.8	16.8
Q64521	Q64521	15	15	15	Glycerol-3-phosphate dehydrogenase, mitochondrial	Gpd2	sp|Q64521|GPDM_MOUSE Glycerol-3-phosphate dehydrogenase, mitochondrial OS=Mus musculus GN=Gpd2 PE=1 SV=2	1	15	15	15	11	13	10	14	10	11	1	1	2	2	1	1	11	13	10	14	10	11	1	1	2	2	1	1	11	13	10	14	10	11	1	1	2	2	1	1	25.2	25.2
Q689Z5	Q689Z5	15	15	13	Protein strawberry notch homolog 1	Sbno1	sp|Q689Z5|SBNO1_MOUSE Protein strawberry notch homolog 1 OS=Mus musculus GN=Sbno1 PE=1 SV=2	1	15	15	13	10	12	12	10	9	9	3	2	2	2	6	5	10	12	12	10	9	9	3	2	2	2	6	5	9	10	10	9	8	8	3	2	2	2	6	5	15.7	15.7
Q6P2K6	Q6P2K6	15	15	10	Serine/threonine-protein phosphatase 4 regulatory subunit 3A	Smek1	sp|Q6P2K6|P4R3A_MOUSE Serine/threonine-protein phosphatase 4 regulatory subunit 3A OS=Mus musculus GN=Ppp4r3a PE=1 SV=1	1	15	15	10	13	14	12	11	13	13	10	5	3	4	8	7	13	14	12	11	13	13	10	5	3	4	8	7	10	9	7	7	8	9	6	3	2	1	5	4	20.2	20.2
Q6P9R1	Q6P9R1	15	15	15	ATP-dependent RNA helicase DDX51	Ddx51	sp|Q6P9R1|DDX51_MOUSE ATP-dependent RNA helicase DDX51 OS=Mus musculus GN=Ddx51 PE=1 SV=1	1	15	15	15	13	13	12	14	12	14	9	8	10	8	6	7	13	13	12	14	12	14	9	8	10	8	6	7	13	13	12	14	12	14	9	8	10	8	6	7	35.2	35.2
Q6PHQ8	Q6PHQ8	15	15	15	N-alpha-acetyltransferase 35, NatC auxiliary subunit	Naa35	sp|Q6PHQ8|NAA35_MOUSE N-alpha-acetyltransferase 35, NatC auxiliary subunit OS=Mus musculus GN=Naa35 PE=1 SV=1	1	15	15	15	11	11	9	10	12	11	1	3	0	1	5	5	11	11	9	10	12	11	1	3	0	1	5	5	11	11	9	10	12	11	1	3	0	1	5	5	23	23
Q6ZPE2	Q6ZPE2	15	15	15	Myotubularin-related protein 5	Sbf1	sp|Q6ZPE2|MTMR5_MOUSE Myotubularin-related protein 5 OS=Mus musculus GN=Sbf1 PE=1 SV=2	1	15	15	15	12	13	12	14	13	13	6	6	3	3	7	7	12	13	12	14	13	13	6	6	3	3	7	7	12	13	12	14	13	13	6	6	3	3	7	7	11.1	11.1
Q6ZQ73	Q6ZQ73	16	15	15	Cullin-associated NEDD8-dissociated protein 2	Cand2	sp|Q6ZQ73|CAND2_MOUSE Cullin-associated NEDD8-dissociated protein 2 OS=Mus musculus GN=Cand2 PE=1 SV=2	1	16	15	15	5	8	13	10	8	11	3	5	6	1	4	6	4	7	12	9	7	10	2	4	5	0	3	5	4	7	12	9	7	10	2	4	5	0	3	5	15.8	15.1
Q76N33	Q76N33	15	15	15	AMSH-like protease	Stambpl1	sp|Q76N33|STALP_MOUSE AMSH-like protease OS=Mus musculus GN=Stambpl1 PE=1 SV=1	1	15	15	15	13	14	12	12	13	13	6	4	5	7	8	6	13	14	12	12	13	13	6	4	5	7	8	6	13	14	12	12	13	13	6	4	5	7	8	6	46.3	46.3
Q80UZ2	Q80UZ2	15	15	15	Protein SDA1 homolog	Sdad1	sp|Q80UZ2|SDA1_MOUSE Protein SDA1 homolog OS=Mus musculus GN=Sdad1 PE=1 SV=1	1	15	15	15	13	13	13	13	13	15	8	7	7	7	7	6	13	13	13	13	13	15	8	7	7	7	7	6	13	13	13	13	13	15	8	7	7	7	7	6	26.2	26.2
Q80X41	Q80X41	15	15	15	Serine/threonine-protein kinase VRK1	Vrk1	sp|Q80X41|VRK1_MOUSE Serine/threonine-protein kinase VRK1 OS=Mus musculus GN=Vrk1 PE=1 SV=2	1	15	15	15	13	14	11	15	13	13	6	7	5	4	11	9	13	14	11	15	13	13	6	7	5	4	11	9	13	14	11	15	13	13	6	7	5	4	11	9	42	42
Q8BG79	Q8BG79	15	15	15	CWF19-like protein 2	Cwf19l2	sp|Q8BG79|C19L2_MOUSE CWF19-like protein 2 OS=Mus musculus GN=Cwf19l2 PE=1 SV=1	1	15	15	15	12	13	8	10	10	11	9	7	6	5	7	8	12	13	8	10	10	11	9	7	6	5	7	8	12	13	8	10	10	11	9	7	6	5	7	8	18.7	18.7
Q8BGA5	Q8BGA5	15	15	15	KRR1 small subunit processome component homolog	Krr1	sp|Q8BGA5|KRR1_MOUSE KRR1 small subunit processome component homolog OS=Mus musculus GN=Krr1 PE=2 SV=1	1	15	15	15	10	11	12	10	11	10	11	9	7	10	11	9	10	11	12	10	11	10	11	9	7	10	11	9	10	11	12	10	11	10	11	9	7	10	11	9	39.7	39.7
Q8BIJ6	Q8BIJ6	15	15	15	Isoleucine--tRNA ligase, mitochondrial	Iars2	sp|Q8BIJ6|SYIM_MOUSE Isoleucine--tRNA ligase, mitochondrial OS=Mus musculus GN=Iars2 PE=1 SV=1	1	15	15	15	13	10	13	12	12	12	2	2	1	1	2	3	13	10	13	12	12	12	2	2	1	1	2	3	13	10	13	12	12	12	2	2	1	1	2	3	21	21
Q8BJW5	Q8BJW5	15	15	15	Nucleolar protein 11	Nol11	sp|Q8BJW5|NOL11_MOUSE Nucleolar protein 11 OS=Mus musculus GN=Nol11 PE=2 SV=1	1	15	15	15	7	7	9	8	9	10	4	5	5	3	7	3	7	7	9	8	9	10	4	5	5	3	7	3	7	7	9	8	9	10	4	5	5	3	7	3	27.7	27.7
Q8BU03	Q8BU03	15	15	15	Periodic tryptophan protein 2 homolog	Pwp2	sp|Q8BU03|PWP2_MOUSE Periodic tryptophan protein 2 homolog OS=Mus musculus GN=Pwp2 PE=1 SV=1	1	15	15	15	13	13	13	14	13	12	9	8	11	11	9	10	13	13	13	14	13	12	9	8	11	11	9	10	13	13	13	14	13	12	9	8	11	11	9	10	22.7	22.7
Q8BU04	Q8BU04	15	15	15	Putative E3 ubiquitin-protein ligase UBR7	Ubr7	sp|Q8BU04|UBR7_MOUSE Putative E3 ubiquitin-protein ligase UBR7 OS=Mus musculus GN=Ubr7 PE=1 SV=1	1	15	15	15	14	13	7	13	13	13	5	4	2	2	5	3	14	13	7	13	13	13	5	4	2	2	5	3	14	13	7	13	13	13	5	4	2	2	5	3	49.9	49.9
Q8BW10	Q8BW10	15	15	15	RNA-binding protein NOB1	Nob1	sp|Q8BW10|NOB1_MOUSE RNA-binding protein NOB1 OS=Mus musculus GN=Nob1 PE=1 SV=1	1	15	15	15	15	12	13	15	14	15	7	4	6	6	7	11	15	12	13	15	14	15	7	4	6	6	7	11	15	12	13	15	14	15	7	4	6	6	7	11	41.4	41.4
Q8BWT1	Q8BWT1	15	15	15	3-ketoacyl-CoA thiolase, mitochondrial	Acaa2	sp|Q8BWT1|THIM_MOUSE 3-ketoacyl-CoA thiolase, mitochondrial OS=Mus musculus GN=Acaa2 PE=1 SV=3	1	15	15	15	12	13	12	14	10	10	0	0	2	2	1	1	12	13	12	14	10	10	0	0	2	2	1	1	12	13	12	14	10	10	0	0	2	2	1	1	56.2	56.2
Q8BWY3	Q8BWY3	15	15	15	Eukaryotic peptide chain release factor subunit 1	Etf1	sp|Q8BWY3|ERF1_MOUSE Eukaryotic peptide chain release factor subunit 1 OS=Mus musculus GN=Etf1 PE=1 SV=4	1	15	15	15	12	14	11	14	11	10	6	4	4	5	7	5	12	14	11	14	11	10	6	4	4	5	7	5	12	14	11	14	11	10	6	4	4	5	7	5	43.2	43.2
Q8BY02	Q8BY02	15	15	15	NF-kappa-B-repressing factor	Nkrf	sp|Q8BY02|NKRF_MOUSE NF-kappa-B-repressing factor OS=Mus musculus GN=Nkrf PE=2 SV=3	1	15	15	15	8	10	6	9	7	9	9	6	5	6	6	8	8	10	6	9	7	9	9	6	5	6	6	8	8	10	6	9	7	9	9	6	5	6	6	8	24.2	24.2
Q8C0D5	Q8C0D5	15	15	15	Elongation factor Tu GTP-binding domain-containing protein 1	Eftud1	sp|Q8C0D5|EFL1_MOUSE Elongation factor-like GTPase 1 OS=Mus musculus GN=Efl1 PE=1 SV=1	1	15	15	15	13	13	11	12	12	12	5	3	5	4	8	11	13	13	11	12	12	12	5	3	5	4	8	11	13	13	11	12	12	12	5	3	5	4	8	11	19.6	19.6
Q8C0S1	Q8C0S1	15	15	15	DIS3-like exonuclease 1	Dis3l	sp|Q8C0S1|DI3L1_MOUSE DIS3-like exonuclease 1 OS=Mus musculus GN=Dis3l PE=1 SV=2	1	15	15	15	13	12	11	11	9	10	2	2	1	0	3	2	13	12	11	11	9	10	2	2	1	0	3	2	13	12	11	11	9	10	2	2	1	0	3	2	15.7	15.7
Q8C129	Q8C129	15	15	15	Leucyl-cystinyl aminopeptidase	Lnpep	sp|Q8C129|LCAP_MOUSE Leucyl-cystinyl aminopeptidase OS=Mus musculus GN=Lnpep PE=1 SV=1	1	15	15	15	14	14	13	14	15	15	4	1	0	0	0	3	14	14	13	14	15	15	4	1	0	0	0	3	14	14	13	14	15	15	4	1	0	0	0	3	19	19
Q8C7V3	Q8C7V3	15	15	15	U3 small nucleolar RNA-associated protein 15 homolog	Utp15	sp|Q8C7V3|UTP15_MOUSE U3 small nucleolar RNA-associated protein 15 homolog OS=Mus musculus GN=Utp15 PE=1 SV=1	1	15	15	15	12	12	10	12	10	9	8	12	10	7	10	13	12	12	10	12	10	9	8	12	10	7	10	13	12	12	10	12	10	9	8	12	10	7	10	13	41.7	41.7
Q8CBW3;P62484	Q8CBW3	15;3	15;3	15;3	Abl interactor 1	Abi1	sp|Q8CBW3|ABI1_MOUSE Abl interactor 1 OS=Mus musculus GN=Abi1 PE=1 SV=3	2	15	15	15	12	13	10	14	11	14	5	4	2	2	6	5	12	13	10	14	11	14	5	4	2	2	6	5	12	13	10	14	11	14	5	4	2	2	6	5	36.6	36.6
Q8CD92	Q8CD92	15	15	15	Tetratricopeptide repeat protein 27	Ttc27	sp|Q8CD92|TTC27_MOUSE Tetratricopeptide repeat protein 27 OS=Mus musculus GN=Ttc27 PE=1 SV=2	1	15	15	15	12	14	10	13	11	11	8	8	5	6	7	9	12	14	10	13	11	11	8	8	5	6	7	9	12	14	10	13	11	11	8	8	5	6	7	9	20.3	20.3
Q8CEE0	Q8CEE0	15	15	15	Centrosomal protein of 57 kDa	Cep57	sp|Q8CEE0|CEP57_MOUSE Centrosomal protein of 57 kDa OS=Mus musculus GN=Cep57 PE=1 SV=2	1	15	15	15	9	12	7	10	9	6	9	7	6	6	6	7	9	12	7	10	9	6	9	7	6	6	6	7	9	12	7	10	9	6	9	7	6	6	6	7	31.2	31.2
Q8CG46	Q8CG46	15	15	15	Structural maintenance of chromosomes protein 5	Smc5	sp|Q8CG46|SMC5_MOUSE Structural maintenance of chromosomes protein 5 OS=Mus musculus GN=Smc5 PE=1 SV=1	1	15	15	15	12	13	10	10	11	12	9	6	7	4	9	8	12	13	10	10	11	12	9	6	7	4	9	8	12	13	10	10	11	12	9	6	7	4	9	8	16.1	16.1
Q8CGI1	Q8CGI1	15	15	15	Protein FAM193A	Fam193a	sp|Q8CGI1|F193A_MOUSE Protein FAM193A OS=Mus musculus GN=Fam193a PE=1 SV=2	1	15	15	15	10	12	7	9	8	8	2	2	2	1	2	4	10	12	7	9	8	8	2	2	2	1	2	4	10	12	7	9	8	8	2	2	2	1	2	4	15.4	15.4
Q8CIB9	Q8CIB9	15	15	15	N-acetyltransferase ESCO2	Esco2	sp|Q8CIB9|ESCO2_MOUSE N-acetyltransferase ESCO2 OS=Mus musculus GN=Esco2 PE=2 SV=3	1	15	15	15	12	11	8	13	10	10	8	8	5	8	7	6	12	11	8	13	10	10	8	8	5	8	7	6	12	11	8	13	10	10	8	8	5	8	7	6	35.1	35.1
Q8CIV8	Q8CIV8	15	15	15	Tubulin-specific chaperone E	Tbce	sp|Q8CIV8|TBCE_MOUSE Tubulin-specific chaperone E OS=Mus musculus GN=Tbce PE=1 SV=1	1	15	15	15	11	10	10	11	11	12	4	5	5	3	7	7	11	10	10	11	11	12	4	5	5	3	7	7	11	10	10	11	11	12	4	5	5	3	7	7	40.5	40.5
Q8JZX4	Q8JZX4	15	15	15	Splicing factor 45	Rbm17	sp|Q8JZX4|SPF45_MOUSE Splicing factor 45 OS=Mus musculus GN=Rbm17 PE=1 SV=1	1	15	15	15	12	13	11	13	10	11	9	8	6	6	8	5	12	13	11	13	10	11	9	8	6	6	8	5	12	13	11	13	10	11	9	8	6	6	8	5	33.1	33.1
Q8K297	Q8K297	15	15	15	Procollagen galactosyltransferase 1	Colgalt1	sp|Q8K297|GT251_MOUSE Procollagen galactosyltransferase 1 OS=Mus musculus GN=Colgalt1 PE=1 SV=2	1	15	15	15	13	13	10	12	12	12	1	0	1	0	4	4	13	13	10	12	12	12	1	0	1	0	4	4	13	13	10	12	12	12	1	0	1	0	4	4	27.7	27.7
Q8K2C7	Q8K2C7	15	15	15	Protein OS-9	Os9	sp|Q8K2C7|OS9_MOUSE Protein OS-9 OS=Mus musculus GN=Os9 PE=1 SV=2	1	15	15	15	11	10	7	7	6	5	3	1	0	0	1	2	11	10	7	7	6	5	3	1	0	0	1	2	11	10	7	7	6	5	3	1	0	0	1	2	28.9	28.9
Q8K2T1	Q8K2T1	15	15	15	NmrA-like family domain-containing protein 1	Nmral1	sp|Q8K2T1|NMRL1_MOUSE NmrA-like family domain-containing protein 1 OS=Mus musculus GN=Nmral1 PE=1 SV=1	1	15	15	15	13	14	13	13	13	12	9	8	7	6	5	6	13	14	13	13	13	12	9	8	7	6	5	6	13	14	13	13	13	12	9	8	7	6	5	6	48.5	48.5
Q8K3A9	Q8K3A9	15	15	15	7SK snRNA methylphosphate capping enzyme	Mepce	sp|Q8K3A9|MEPCE_MOUSE 7SK snRNA methylphosphate capping enzyme OS=Mus musculus GN=Mepce PE=1 SV=2	1	15	15	15	10	12	12	11	13	13	8	7	5	4	8	5	10	12	12	11	13	13	8	7	5	4	8	5	10	12	12	11	13	13	8	7	5	4	8	5	33	33
Q8K3W3	Q8K3W3	15	15	15	Protein CASC3	Casc3	sp|Q8K3W3|CASC3_MOUSE Protein CASC3 OS=Mus musculus GN=Casc3 PE=1 SV=3	1	15	15	15	9	9	4	9	8	10	4	3	5	3	3	4	9	9	4	9	8	10	4	3	5	3	3	4	9	9	4	9	8	10	4	3	5	3	3	4	26.2	26.2
Q8K4L0	Q8K4L0	15	15	15	ATP-dependent RNA helicase DDX54	Ddx54	sp|Q8K4L0|DDX54_MOUSE ATP-dependent RNA helicase DDX54 OS=Mus musculus GN=Ddx54 PE=1 SV=1	1	15	15	15	14	14	10	13	14	14	11	9	8	8	8	11	14	14	10	13	14	14	11	9	8	8	8	11	14	14	10	13	14	14	11	9	8	8	8	11	23.8	23.8
Q8R2N2	Q8R2N2	15	15	15	Cirhin	Cirh1a	sp|Q8R2N2|UTP4_MOUSE U3 small nucleolar RNA-associated protein 4 homolog OS=Mus musculus GN=Utp4 PE=2 SV=3	1	15	15	15	14	13	12	14	12	11	10	10	8	9	10	10	14	13	12	14	12	11	10	10	8	9	10	10	14	13	12	14	12	11	10	10	8	9	10	10	31.2	31.2
Q8R2T8	Q8R2T8	15	15	15	General transcription factor 3C polypeptide 5	Gtf3c5	sp|Q8R2T8|TF3C5_MOUSE General transcription factor 3C polypeptide 5 OS=Mus musculus GN=Gtf3c5 PE=2 SV=2	1	15	15	15	13	13	11	11	11	12	4	7	5	5	7	7	13	13	11	11	11	12	4	7	5	5	7	7	13	13	11	11	11	12	4	7	5	5	7	7	33.7	33.7
Q8VDG3	Q8VDG3	15	15	15	Poly(A)-specific ribonuclease PARN	Parn	sp|Q8VDG3|PARN_MOUSE Poly(A)-specific ribonuclease PARN OS=Mus musculus GN=Parn PE=1 SV=1	1	15	15	15	11	11	9	12	12	12	6	7	8	4	6	9	11	11	9	12	12	12	6	7	8	4	6	9	11	11	9	12	12	12	6	7	8	4	6	9	28.8	28.8
Q91WG4	Q91WG4	15	15	15	Elongator complex protein 2	Elp2	sp|Q91WG4|ELP2_MOUSE Elongator complex protein 2 OS=Mus musculus GN=Elp2 PE=1 SV=1	1	15	15	15	11	12	10	9	11	12	3	4	1	1	5	3	11	12	10	9	11	12	3	4	1	1	5	3	11	12	10	9	11	12	3	4	1	1	5	3	27.6	27.6
Q91WN1	Q91WN1	15	15	15	DnaJ homolog subfamily C member 9	Dnajc9	sp|Q91WN1|DNJC9_MOUSE DnaJ homolog subfamily C member 9 OS=Mus musculus GN=Dnajc9 PE=1 SV=2	1	15	15	15	14	15	12	13	13	12	8	8	6	9	12	10	14	15	12	13	13	12	8	8	6	9	12	10	14	15	12	13	13	12	8	8	6	9	12	10	51	51
Q91Z53	Q91Z53	15	15	15	Glyoxylate reductase/hydroxypyruvate reductase	Grhpr	sp|Q91Z53|GRHPR_MOUSE Glyoxylate reductase/hydroxypyruvate reductase OS=Mus musculus GN=Grhpr PE=1 SV=1	1	15	15	15	13	15	13	11	13	13	3	4	3	1	11	8	13	15	13	11	13	13	3	4	3	1	11	8	13	15	13	11	13	13	3	4	3	1	11	8	57	57
Q921H8;Q8VCH0	Q921H8	15;6	15;6	15;6	3-ketoacyl-CoA thiolase A, peroxisomal	Acaa1a	sp|Q921H8|THIKA_MOUSE 3-ketoacyl-CoA thiolase A, peroxisomal OS=Mus musculus GN=Acaa1a PE=1 SV=1	2	15	15	15	12	13	15	12	15	13	6	5	2	4	7	7	12	13	15	12	15	13	6	5	2	4	7	7	12	13	15	12	15	13	6	5	2	4	7	7	44.6	44.6
Q922Y1	Q922Y1	15	15	15	UBX domain-containing protein 1	Ubxn1	sp|Q922Y1|UBXN1_MOUSE UBX domain-containing protein 1 OS=Mus musculus GN=Ubxn1 PE=1 SV=1	1	15	15	15	12	14	9	11	11	13	6	5	5	5	6	8	12	14	9	11	11	13	6	5	5	5	6	8	12	14	9	11	11	13	6	5	5	5	6	8	68	68
Q923D5	Q923D5	15	15	15	WW domain-binding protein 11	Wbp11	sp|Q923D5|WBP11_MOUSE WW domain-binding protein 11 OS=Mus musculus GN=Wbp11 PE=1 SV=2	1	15	15	15	11	12	9	13	8	13	3	3	3	2	2	2	11	12	9	13	8	13	3	3	3	2	2	2	11	12	9	13	8	13	3	3	3	2	2	2	27.3	27.3
Q99020	Q99020	15	15	15	Heterogeneous nuclear ribonucleoprotein A/B	Hnrnpab	sp|Q99020|ROAA_MOUSE Heterogeneous nuclear ribonucleoprotein A/B OS=Mus musculus GN=Hnrnpab PE=1 SV=1	1	15	15	15	15	14	14	15	14	14	8	8	6	6	9	8	15	14	14	15	14	14	8	8	6	6	9	8	15	14	14	15	14	14	8	8	6	6	9	8	37.9	37.9
Q99K28	Q99K28	15	15	15	ADP-ribosylation factor GTPase-activating protein 2	Arfgap2	sp|Q99K28|ARFG2_MOUSE ADP-ribosylation factor GTPase-activating protein 2 OS=Mus musculus GN=Arfgap2 PE=1 SV=1	1	15	15	15	14	12	7	12	8	8	6	7	5	7	6	5	14	12	7	12	8	8	6	7	5	7	6	5	14	12	7	12	8	8	6	7	5	7	6	5	35.2	35.2
Q99KN9	Q99KN9	15	15	15	Clathrin interactor 1	Clint1	sp|Q99KN9|EPN4_MOUSE Clathrin interactor 1 OS=Mus musculus GN=Clint1 PE=1 SV=2	1	15	15	15	12	13	12	14	12	11	8	9	6	3	10	6	12	13	12	14	12	11	8	9	6	3	10	6	12	13	12	14	12	11	8	9	6	3	10	6	24.4	24.4
Q99KV1	Q99KV1	15	15	15	DnaJ homolog subfamily B member 11	Dnajb11	sp|Q99KV1|DJB11_MOUSE DnaJ homolog subfamily B member 11 OS=Mus musculus GN=Dnajb11 PE=1 SV=1	1	15	15	15	14	14	13	15	13	11	7	6	7	2	7	7	14	14	13	15	13	11	7	6	7	2	7	7	14	14	13	15	13	11	7	6	7	2	7	7	46.9	46.9
Q99N57	Q99N57	15	15	10	RAF proto-oncogene serine/threonine-protein kinase	Raf1	sp|Q99N57|RAF1_MOUSE RAF proto-oncogene serine/threonine-protein kinase OS=Mus musculus GN=Raf1 PE=1 SV=2	1	15	15	10	13	13	11	8	11	11	3	4	2	1	4	3	13	13	11	8	11	11	3	4	2	1	4	3	9	9	7	6	7	8	2	2	1	1	3	3	35.5	35.5
Q9CQ65	Q9CQ65	15	15	15	S-methyl-5-thioadenosine phosphorylase	Mtap	sp|Q9CQ65|MTAP_MOUSE S-methyl-5-thioadenosine phosphorylase OS=Mus musculus GN=Mtap PE=1 SV=1	1	15	15	15	14	13	14	14	14	14	6	6	5	7	9	7	14	13	14	14	14	14	6	6	5	7	9	7	14	13	14	14	14	14	6	6	5	7	9	7	58.3	58.3
Q9CQA3	Q9CQA3	15	15	15	Succinate dehydrogenase [ubiquinone] iron-sulfur subunit, mitochondrial	Sdhb	sp|Q9CQA3|SDHB_MOUSE Succinate dehydrogenase [ubiquinone] iron-sulfur subunit, mitochondrial OS=Mus musculus GN=Sdhb PE=1 SV=1	1	15	15	15	13	14	12	14	13	13	5	6	2	0	3	2	13	14	12	14	13	13	5	6	2	0	3	2	13	14	12	14	13	13	5	6	2	0	3	2	58.2	58.2
Q9CQE8	Q9CQE8	15	15	15	UPF0568 protein C14orf166 homolog		sp|Q9CQE8|RTRAF_MOUSE RNA transcription, translation and transport factor protein OS=Mus musculus GN=RTRAF PE=1 SV=1	1	15	15	15	12	13	10	14	13	13	7	6	7	5	10	8	12	13	10	14	13	13	7	6	7	5	10	8	12	13	10	14	13	13	7	6	7	5	10	8	63.1	63.1
Q9CRT8	Q9CRT8	15	15	15	Exportin-T	Xpot	sp|Q9CRT8|XPOT_MOUSE Exportin-T OS=Mus musculus GN=Xpot PE=1 SV=3	1	15	15	15	12	13	11	14	13	13	5	6	4	1	5	5	12	13	11	14	13	13	5	6	4	1	5	5	12	13	11	14	13	13	5	6	4	1	5	5	18.2	18.2
Q9CXG3	Q9CXG3	15	15	15	Peptidyl-prolyl cis-trans isomerase-like 4	Ppil4	sp|Q9CXG3|PPIL4_MOUSE Peptidyl-prolyl cis-trans isomerase-like 4 OS=Mus musculus GN=Ppil4 PE=1 SV=2	1	15	15	15	12	11	11	11	11	12	7	5	4	1	7	6	12	11	11	11	11	12	7	5	4	1	7	6	12	11	11	11	11	12	7	5	4	1	7	6	36	36
Q9CXW4	Q9CXW4	15	15	15	60S ribosomal protein L11	Rpl11	sp|Q9CXW4|RL11_MOUSE 60S ribosomal protein L11 OS=Mus musculus GN=Rpl11 PE=1 SV=4	1	15	15	15	11	11	10	11	12	11	9	7	10	9	5	8	11	11	10	11	12	11	9	7	10	9	5	8	11	11	10	11	12	11	9	7	10	9	5	8	68.5	68.5
Q9CYH6	Q9CYH6	15	15	15	Ribosome biogenesis regulatory protein homolog	Rrs1	sp|Q9CYH6|RRS1_MOUSE Ribosome biogenesis regulatory protein homolog OS=Mus musculus GN=Rrs1 PE=1 SV=1	1	15	15	15	9	13	10	13	12	9	10	7	8	6	8	9	9	13	10	13	12	9	10	7	8	6	8	9	9	13	10	13	12	9	10	7	8	6	8	9	41.4	41.4
Q9CZW4	Q9CZW4	16	15	15	Long-chain-fatty-acid--CoA ligase 3	Acsl3	sp|Q9CZW4|ACSL3_MOUSE Long-chain-fatty-acid--CoA ligase 3 OS=Mus musculus GN=Acsl3 PE=1 SV=2	1	16	15	15	16	13	13	13	15	16	9	10	7	5	9	6	15	12	12	12	14	15	8	9	6	5	8	6	15	12	12	12	14	15	8	9	6	5	8	6	27.9	26.4
Q9D0B0	Q9D0B0	15	15	15	Serine/arginine-rich splicing factor 9	Srsf9	sp|Q9D0B0|SRSF9_MOUSE Serine/arginine-rich splicing factor 9 OS=Mus musculus GN=Srsf9 PE=1 SV=1	1	15	15	15	15	14	13	13	14	13	9	7	8	5	8	8	15	14	13	13	14	13	9	7	8	5	8	8	15	14	13	13	14	13	9	7	8	5	8	8	63.1	63.1
Q9D0C4	Q9D0C4	15	15	15	tRNA (guanine(37)-N1)-methyltransferase	Trmt5	sp|Q9D0C4|TRM5_MOUSE tRNA (guanine(37)-N1)-methyltransferase OS=Mus musculus GN=Trmt5 PE=1 SV=1	1	15	15	15	13	13	11	13	10	13	6	4	3	2	4	5	13	13	11	13	10	13	6	4	3	2	4	5	13	13	11	13	10	13	6	4	3	2	4	5	33.7	33.7
Q9D0N7	Q9D0N7	15	15	15	Chromatin assembly factor 1 subunit B	Chaf1b	sp|Q9D0N7|CAF1B_MOUSE Chromatin assembly factor 1 subunit B OS=Mus musculus GN=Chaf1b PE=1 SV=1	1	15	15	15	11	11	7	9	10	8	4	7	3	3	8	6	11	11	7	9	10	8	4	7	3	3	8	6	11	11	7	9	10	8	4	7	3	3	8	6	33.6	33.6
Q9D1Q6	Q9D1Q6	15	15	15	Endoplasmic reticulum resident protein 44	Erp44	sp|Q9D1Q6|ERP44_MOUSE Endoplasmic reticulum resident protein 44 OS=Mus musculus GN=Erp44 PE=1 SV=1	1	15	15	15	14	12	12	12	14	11	3	2	2	1	2	4	14	12	12	12	14	11	3	2	2	1	2	4	14	12	12	12	14	11	3	2	2	1	2	4	42.1	42.1
Q9D4J7	Q9D4J7	15	15	15	PHD finger protein 6	Phf6	sp|Q9D4J7|PHF6_MOUSE PHD finger protein 6 OS=Mus musculus GN=Phf6 PE=1 SV=1	1	15	15	15	13	13	11	12	11	13	9	8	4	3	8	9	13	13	11	12	11	13	9	8	4	3	8	9	13	13	11	12	11	13	9	8	4	3	8	9	53	53
Q9D5T0	Q9D5T0	15	15	15	ATPase family AAA domain-containing protein 1	Atad1	sp|Q9D5T0|ATAD1_MOUSE ATPase family AAA domain-containing protein 1 OS=Mus musculus GN=Atad1 PE=1 SV=1	1	15	15	15	13	13	15	14	14	15	10	7	9	9	10	10	13	13	15	14	14	15	10	7	9	9	10	10	13	13	15	14	14	15	10	7	9	9	10	10	60.9	60.9
Q9D6R2	Q9D6R2	15	15	15	Isocitrate dehydrogenase [NAD] subunit alpha, mitochondrial	Idh3a	sp|Q9D6R2|IDH3A_MOUSE Isocitrate dehydrogenase [NAD] subunit alpha, mitochondrial OS=Mus musculus GN=Idh3a PE=1 SV=1	1	15	15	15	14	14	12	15	13	12	10	8	9	7	8	7	14	14	12	15	13	12	10	8	9	7	8	7	14	14	12	15	13	12	10	8	9	7	8	7	42.3	42.3
Q9D7H3	Q9D7H3	15	15	15	RNA 3-terminal phosphate cyclase	RtcA	sp|Q9D7H3|RTCA_MOUSE RNA 3-terminal phosphate cyclase OS=Mus musculus GN=RtcA PE=1 SV=2	1	15	15	15	10	8	10	11	12	12	8	9	10	11	10	10	10	8	10	11	12	12	8	9	10	11	10	10	10	8	10	11	12	12	8	9	10	11	10	10	47.3	47.3
Q9D824	Q9D824	15	15	15	Pre-mRNA 3-end-processing factor FIP1	Fip1l1	sp|Q9D824|FIP1_MOUSE Pre-mRNA 3-end-processing factor FIP1 OS=Mus musculus GN=Fip1l1 PE=1 SV=1	1	15	15	15	14	14	13	12	12	13	7	8	9	9	9	8	14	14	13	12	12	13	7	8	9	9	9	8	14	14	13	12	12	13	7	8	9	9	9	8	42.5	42.5
Q9DBC7;P12849	Q9DBC7	15;2	15;2	15;2	cAMP-dependent protein kinase type I-alpha regulatory subunit;cAMP-dependent protein kinase type I-alpha regulatory subunit, N-terminally processed	Prkar1a	sp|Q9DBC7|KAP0_MOUSE cAMP-dependent protein kinase type I-alpha regulatory subunit OS=Mus musculus GN=Prkar1a PE=1 SV=3	2	15	15	15	14	14	13	13	12	11	7	9	5	5	9	10	14	14	13	13	12	11	7	9	5	5	9	10	14	14	13	13	12	11	7	9	5	5	9	10	39.9	39.9
Q9ESU6	Q9ESU6	15	15	12	Bromodomain-containing protein 4	Brd4	sp|Q9ESU6|BRD4_MOUSE Bromodomain-containing protein 4 OS=Mus musculus GN=Brd4 PE=1 SV=2	1	15	15	12	13	8	9	8	12	11	3	1	4	2	4	5	13	8	9	8	12	11	3	1	4	2	4	5	11	7	7	7	9	9	2	1	3	1	3	4	13.4	13.4
Q9JKX4	Q9JKX4	15	15	15	Protein AATF	Aatf	sp|Q9JKX4|AATF_MOUSE Protein AATF OS=Mus musculus GN=Aatf PE=1 SV=1	1	15	15	15	10	10	10	11	11	8	11	10	11	9	10	10	10	10	10	11	11	8	11	10	11	9	10	10	10	10	10	11	11	8	11	10	11	9	10	10	40.9	40.9
Q9QXD8;Q7TQJ8;Q91XC0	Q9QXD8	15;1;1	15;1;1	15;1;1	LIM domain-containing protein 1	Limd1	sp|Q9QXD8|LIMD1_MOUSE LIM domain-containing protein 1 OS=Mus musculus GN=Limd1 PE=1 SV=2	3	15	15	15	13	9	11	11	11	8	5	3	2	4	5	2	13	9	11	11	11	8	5	3	2	4	5	2	13	9	11	11	11	8	5	3	2	4	5	2	30.7	30.7
Q9R0I7	Q9R0I7	15	15	15	YLP motif-containing protein 1	Ylpm1	sp|Q9R0I7|YLPM1_MOUSE YLP motif-containing protein 1 OS=Mus musculus GN=Ylpm1 PE=2 SV=2	1	15	15	15	8	12	7	10	9	9	3	1	0	0	2	1	8	12	7	10	9	9	3	1	0	0	2	1	8	12	7	10	9	9	3	1	0	0	2	1	14.6	14.6
Q9R210;Q9WTW4;Q08874	Q9R210	15;1;1	15;1;1	14;0;0	Transcription factor EB	Tfeb	sp|Q9R210|TFEB_MOUSE Transcription factor EB OS=Mus musculus GN=Tfeb PE=1 SV=2	3	15	15	14	12	12	8	12	10	9	7	8	6	4	4	8	12	12	8	12	10	9	7	8	6	4	4	8	11	11	8	11	9	8	7	8	5	3	4	8	36.8	36.8
Q9WUM3	Q9WUM3	15	15	15	Coronin-1B	Coro1b	sp|Q9WUM3|COR1B_MOUSE Coronin-1B OS=Mus musculus GN=Coro1b PE=1 SV=1	1	15	15	15	13	12	13	13	13	12	8	8	4	2	8	7	13	12	13	13	13	12	8	8	4	2	8	7	13	12	13	13	13	12	8	8	4	2	8	7	40.5	40.5
Q9WVR4	Q9WVR4	18	15	15	Fragile X mental retardation syndrome-related protein 2	Fxr2	sp|Q9WVR4|FXR2_MOUSE Fragile X mental retardation syndrome-related protein 2 OS=Mus musculus GN=Fxr2 PE=1 SV=1	1	18	15	15	13	14	9	15	17	16	11	6	8	7	12	10	10	11	7	12	14	13	8	4	7	6	9	8	10	11	7	12	14	13	8	4	7	6	9	8	36.1	30.9
Q9Z0H1	Q9Z0H1	15	15	15	WD repeat-containing protein 46	Wdr46	sp|Q9Z0H1|WDR46_MOUSE WD repeat-containing protein 46 OS=Mus musculus GN=Wdr46 PE=2 SV=1	1	15	15	15	12	12	8	12	9	9	10	12	11	7	9	12	12	12	8	12	9	9	10	12	11	7	9	12	12	12	8	12	9	9	10	12	11	7	9	12	29.9	29.9
Q9Z2I9	Q9Z2I9	15	15	15	Succinyl-CoA ligase [ADP-forming] subunit beta, mitochondrial	Sucla2	sp|Q9Z2I9|SUCB1_MOUSE Succinate--CoA ligase [ADP-forming] subunit beta, mitochondrial OS=Mus musculus GN=Sucla2 PE=1 SV=2	1	15	15	15	15	15	12	15	14	15	9	7	8	9	8	8	15	15	12	15	14	15	9	7	8	9	8	8	15	15	12	15	14	15	9	7	8	9	8	8	29.4	29.4
A2A6A1;A2AKY4	A2A6A1	14;1	14;1	14;1	G patch domain-containing protein 8	Gpatch8	sp|A2A6A1|GPTC8_MOUSE G patch domain-containing protein 8 OS=Mus musculus GN=Gpatch8 PE=1 SV=1	2	14	14	14	8	11	6	9	7	8	2	3	3	2	3	4	8	11	6	9	7	8	2	3	3	2	3	4	8	11	6	9	7	8	2	3	3	2	3	4	12.9	12.9
A2AWA9	A2AWA9	14	14	14	Rab GTPase-activating protein 1	Rabgap1	sp|A2AWA9|RBGP1_MOUSE Rab GTPase-activating protein 1 OS=Mus musculus GN=Rabgap1 PE=1 SV=1	1	14	14	14	7	9	6	7	7	6	3	1	0	0	0	2	7	9	6	7	7	6	3	1	0	0	0	2	7	9	6	7	7	6	3	1	0	0	0	2	14.8	14.8
A2BDX3	A2BDX3	14	14	14	Adenylyltransferase and sulfurtransferase MOCS3;Molybdopterin-synthase adenylyltransferase;Molybdopterin-synthase sulfurtransferase	Mocs3	sp|A2BDX3|MOCS3_MOUSE Adenylyltransferase and sulfurtransferase MOCS3 OS=Mus musculus GN=Mocs3 PE=1 SV=1	1	14	14	14	11	12	7	11	10	8	6	6	2	2	3	3	11	12	7	11	10	8	6	6	2	2	3	3	11	12	7	11	10	8	6	6	2	2	3	3	41.1	41.1
E9Q784	E9Q784	14	14	14		Zc3h13	sp|E9Q784|ZC3HD_MOUSE Zinc finger CCCH domain-containing protein 13 OS=Mus musculus GN=Zc3h13 PE=1 SV=1	1	14	14	14	12	10	8	12	10	11	7	3	5	6	5	3	12	10	8	12	10	11	7	3	5	6	5	3	12	10	8	12	10	11	7	3	5	6	5	3	10.1	10.1
O35344	O35344	14	14	10	Importin subunit alpha-4	Kpna3	sp|O35344|IMA4_MOUSE Importin subunit alpha-4 OS=Mus musculus GN=Kpna3 PE=1 SV=1	1	14	14	10	13	11	12	11	12	10	10	9	7	5	8	9	13	11	12	11	12	10	10	9	7	5	8	9	10	9	10	8	9	8	7	6	6	3	7	7	37.2	37.2
O35654	O35654	14	14	14	DNA polymerase delta subunit 2	Pold2	sp|O35654|DPOD2_MOUSE DNA polymerase delta subunit 2 OS=Mus musculus GN=Pold2 PE=1 SV=2	1	14	14	14	12	13	11	14	14	13	4	3	3	3	9	9	12	13	11	14	14	13	4	3	3	3	9	9	12	13	11	14	14	13	4	3	3	3	9	9	45.8	45.8
O35841	O35841	14	14	14	Apoptosis inhibitor 5	Api5	sp|O35841|API5_MOUSE Apoptosis inhibitor 5 OS=Mus musculus GN=Api5 PE=1 SV=2	1	14	14	14	12	12	12	12	13	12	5	5	4	2	3	3	12	12	12	12	13	12	5	5	4	2	3	3	12	12	12	12	13	12	5	5	4	2	3	3	35.1	35.1
O54734	O54734	14	14	14	Dolichyl-diphosphooligosaccharide--protein glycosyltransferase 48 kDa subunit	Ddost	sp|O54734|OST48_MOUSE Dolichyl-diphosphooligosaccharide--protein glycosyltransferase 48 kDa subunit OS=Mus musculus GN=Ddost PE=1 SV=2	1	14	14	14	14	14	11	12	11	13	9	9	9	8	8	9	14	14	11	12	11	13	9	9	9	8	8	9	14	14	11	12	11	13	9	9	9	8	8	9	43.3	43.3
O54825	O54825	14	14	14	Bystin	Bysl	sp|O54825|BYST_MOUSE Bystin OS=Mus musculus GN=Bysl PE=1 SV=3	1	14	14	14	10	12	12	10	9	11	7	7	7	9	7	10	10	12	12	10	9	11	7	7	7	9	7	10	10	12	12	10	9	11	7	7	7	9	7	10	33.9	33.9
O70400	O70400	14	14	14	PDZ and LIM domain protein 1	Pdlim1	sp|O70400|PDLI1_MOUSE PDZ and LIM domain protein 1 OS=Mus musculus GN=Pdlim1 PE=1 SV=4	1	14	14	14	13	13	12	14	14	14	4	4	3	3	4	5	13	13	12	14	14	14	4	4	3	3	4	5	13	13	12	14	14	14	4	4	3	3	4	5	65.4	65.4
O88712;P56546	O88712	14;4	14;4	14;4	C-terminal-binding protein 1	Ctbp1	sp|O88712|CTBP1_MOUSE C-terminal-binding protein 1 OS=Mus musculus GN=Ctbp1 PE=1 SV=2	2	14	14	14	13	12	12	11	12	11	8	5	3	3	5	6	13	12	12	11	12	11	8	5	3	3	5	6	13	12	12	11	12	11	8	5	3	3	5	6	52.6	52.6
O88967	O88967	14	14	14	ATP-dependent zinc metalloprotease YME1L1	Yme1l1	sp|O88967|YMEL1_MOUSE ATP-dependent zinc metalloprotease YME1L1 OS=Mus musculus GN=Yme1l1 PE=1 SV=1	1	14	14	14	11	13	10	11	10	12	6	6	5	1	6	6	11	13	10	11	10	12	6	6	5	1	6	6	11	13	10	11	10	12	6	6	5	1	6	6	23.8	23.8
P03958	P03958	14	14	14	Adenosine deaminase	Ada	sp|P03958|ADA_MOUSE Adenosine deaminase OS=Mus musculus GN=Ada PE=1 SV=3	1	14	14	14	9	12	13	13	12	10	1	0	0	0	1	0	9	12	13	13	12	10	1	0	0	0	1	0	9	12	13	13	12	10	1	0	0	0	1	0	45.5	45.5
P05201	P05201	14	14	14	Aspartate aminotransferase, cytoplasmic	Got1	sp|P05201|AATC_MOUSE Aspartate aminotransferase, cytoplasmic OS=Mus musculus GN=Got1 PE=1 SV=3	1	14	14	14	14	14	13	14	14	14	0	0	3	2	5	2	14	14	13	14	14	14	0	0	3	2	5	2	14	14	13	14	14	14	0	0	3	2	5	2	43.6	43.6
P08228	P08228	14	14	14	Superoxide dismutase [Cu-Zn]	Sod1	sp|P08228|SODC_MOUSE Superoxide dismutase [Cu-Zn] OS=Mus musculus GN=Sod1 PE=1 SV=2	1	14	14	14	14	11	11	12	12	14	2	2	1	4	2	3	14	11	11	12	12	14	2	2	1	4	2	3	14	11	11	12	12	14	2	2	1	4	2	3	57.8	57.8
P21956	P21956	14	14	14	Lactadherin	Mfge8	sp|P21956|MFGM_MOUSE Lactadherin OS=Mus musculus GN=Mfge8 PE=1 SV=3	1	14	14	14	11	10	10	10	12	12	2	5	4	1	5	4	11	10	10	10	12	12	2	5	4	1	5	4	11	10	10	10	12	12	2	5	4	1	5	4	36.3	36.3
P22892	P22892	14	14	14	AP-1 complex subunit gamma-1	Ap1g1	sp|P22892|AP1G1_MOUSE AP-1 complex subunit gamma-1 OS=Mus musculus GN=Ap1g1 PE=1 SV=3	1	14	14	14	12	10	10	9	11	9	4	3	3	1	5	4	12	10	10	9	11	9	4	3	3	1	5	4	12	10	10	9	11	9	4	3	3	1	5	4	19.5	19.5
P26323;P81270	P26323	14;1	14;1	14;1	Friend leukemia integration 1 transcription factor	Fli1	sp|P26323|FLI1_MOUSE Friend leukemia integration 1 transcription factor OS=Mus musculus GN=Fli1 PE=1 SV=1	2	14	14	14	11	11	7	10	12	12	3	3	2	1	6	5	11	11	7	10	12	12	3	3	2	1	6	5	11	11	7	10	12	12	3	3	2	1	6	5	45.4	45.4
P27641	P27641	14	14	14	X-ray repair cross-complementing protein 5	Xrcc5	sp|P27641|XRCC5_MOUSE X-ray repair cross-complementing protein 5 OS=Mus musculus GN=Xrcc5 PE=1 SV=4	1	14	14	14	11	11	10	11	10	9	7	7	4	4	5	3	11	11	10	11	10	9	7	7	4	4	5	3	11	11	10	11	10	9	7	7	4	4	5	3	23.6	23.6
P28650	P28650	15	14	14	Adenylosuccinate synthetase isozyme 1	Adssl1	sp|P28650|PURA1_MOUSE Adenylosuccinate synthetase isozyme 1 OS=Mus musculus GN=Adssl1 PE=1 SV=2	1	15	14	14	7	3	4	3	14	14	0	1	1	0	7	7	7	3	4	3	14	13	0	1	1	0	7	7	7	3	4	3	14	13	0	1	1	0	7	7	43.3	40.3
P35980	P35980	14	14	14	60S ribosomal protein L18	Rpl18	sp|P35980|RL18_MOUSE 60S ribosomal protein L18 OS=Mus musculus GN=Rpl18 PE=1 SV=3	1	14	14	14	11	13	10	12	10	10	7	8	8	7	7	8	11	13	10	12	10	10	7	8	8	7	7	8	11	13	10	12	10	10	7	8	8	7	7	8	50	50
P42128	P42128	14	14	14	Forkhead box protein K1	Foxk1	sp|P42128|FOXK1_MOUSE Forkhead box protein K1 OS=Mus musculus GN=Foxk1 PE=1 SV=2	1	14	14	14	11	12	12	11	11	10	8	7	8	7	9	7	11	12	12	11	11	10	8	7	8	7	9	7	11	12	12	11	11	10	8	7	8	7	9	7	23.2	23.2
P42567	P42567	14	14	14	Epidermal growth factor receptor substrate 15	Eps15	sp|P42567|EPS15_MOUSE Epidermal growth factor receptor substrate 15 OS=Mus musculus GN=Eps15 PE=1 SV=1	1	14	14	14	8	10	9	9	8	8	1	1	1	0	2	2	8	10	9	9	8	8	1	1	1	0	2	2	8	10	9	9	8	8	1	1	1	0	2	2	19.2	19.2
P47753	P47753	14	14	12	F-actin-capping protein subunit alpha-1	Capza1	sp|P47753|CAZA1_MOUSE F-actin-capping protein subunit alpha-1 OS=Mus musculus GN=Capza1 PE=1 SV=4	1	14	14	12	13	12	12	12	10	12	9	12	11	7	9	9	13	12	12	12	10	12	9	12	11	7	9	9	11	10	10	10	8	10	7	10	9	5	7	7	73.4	73.4
P59997	P59997	14	14	14	Lysine-specific demethylase 2A	Kdm2a	sp|P59997|KDM2A_MOUSE Lysine-specific demethylase 2A OS=Mus musculus GN=Kdm2a PE=1 SV=2	1	14	14	14	10	8	11	11	12	11	3	4	5	4	2	5	10	8	11	11	12	11	3	4	5	4	2	5	10	8	11	11	12	11	3	4	5	4	2	5	16.1	16.1
P61161	P61161	14	14	14	Actin-related protein 2	Actr2	sp|P61161|ARP2_MOUSE Actin-related protein 2 OS=Mus musculus GN=Actr2 PE=1 SV=1	1	14	14	14	11	11	11	11	13	13	8	7	5	5	8	7	11	11	11	11	13	13	8	7	5	5	8	7	11	11	11	11	13	13	8	7	5	5	8	7	41.4	41.4
P61255	P61255	14	14	14	60S ribosomal protein L26	Rpl26	sp|P61255|RL26_MOUSE 60S ribosomal protein L26 OS=Mus musculus GN=Rpl26 PE=1 SV=1	1	14	14	14	12	12	10	12	12	12	10	8	9	9	8	11	12	12	10	12	12	12	10	8	9	9	8	11	12	12	10	12	12	12	10	8	9	9	8	11	55.2	55.2
P61982	P61982	17	14	11	14-3-3 protein gamma;14-3-3 protein gamma, N-terminally processed	Ywhag	sp|P61982|1433G_MOUSE 14-3-3 protein gamma OS=Mus musculus GN=Ywhag PE=1 SV=2	1	17	14	11	13	14	11	15	15	14	8	11	10	9	11	12	10	11	9	12	12	11	6	9	8	8	9	10	7	8	6	9	9	8	5	7	7	6	7	8	61.9	57.9
P62962	P62962	14	14	6	Profilin-1	Pfn1	sp|P62962|PROF1_MOUSE Profilin-1 OS=Mus musculus GN=Pfn1 PE=1 SV=2	1	14	14	6	13	14	13	12	13	13	10	10	8	9	10	10	13	14	13	12	13	13	10	10	8	9	10	10	6	6	6	5	5	6	4	5	4	5	4	4	77.9	77.9
P63005	P63005	14	14	14	Platelet-activating factor acetylhydrolase IB subunit alpha	Pafah1b1	sp|P63005|LIS1_MOUSE Platelet-activating factor acetylhydrolase IB subunit alpha OS=Mus musculus GN=Pafah1b1 PE=1 SV=2	1	14	14	14	14	13	11	14	13	14	4	4	2	2	5	5	14	13	11	14	13	14	4	4	2	2	5	5	14	13	11	14	13	14	4	4	2	2	5	5	38.3	38.3
P63325	P63325	14	14	14	40S ribosomal protein S10	Rps10	sp|P63325|RS10_MOUSE 40S ribosomal protein S10 OS=Mus musculus GN=Rps10 PE=1 SV=1	1	14	14	14	13	13	11	13	13	14	6	10	9	10	9	10	13	13	11	13	13	14	6	10	9	10	9	10	13	13	11	13	13	14	6	10	9	10	9	10	60	60
P68404	P68404	14	14	11	Protein kinase C beta type	Prkcb	sp|P68404|KPCB_MOUSE Protein kinase C beta type OS=Mus musculus GN=Prkcb PE=1 SV=4	1	14	14	11	10	9	8	8	9	9	5	2	4	3	5	4	10	9	8	8	9	9	5	2	4	3	5	4	9	8	7	6	7	8	5	2	3	3	5	4	27.1	27.1
P70429	P70429	14	14	14	Ena/VASP-like protein	Evl	sp|P70429|EVL_MOUSE Ena/VASP-like protein OS=Mus musculus GN=Evl PE=1 SV=2	1	14	14	14	12	13	11	12	14	11	7	4	4	2	8	7	12	13	11	12	14	11	7	4	4	2	8	7	12	13	11	12	14	11	7	4	4	2	8	7	39.4	39.4
P70700	P70700	14	14	14	DNA-directed RNA polymerase I subunit RPA2	Polr1b	sp|P70700|RPA2_MOUSE DNA-directed RNA polymerase I subunit RPA2 OS=Mus musculus GN=Polr1b PE=1 SV=2	1	14	14	14	11	9	6	11	10	11	5	6	4	3	7	5	11	9	6	11	10	11	5	6	4	3	7	5	11	9	6	11	10	11	5	6	4	3	7	5	14.2	14.2
P83887;Q8VCK3	P83887;Q8VCK3	14;10	14;10	14;10	Tubulin gamma-1 chain;Tubulin gamma-2 chain	Tubg1;Tubg2	sp|P83887|TBG1_MOUSE Tubulin gamma-1 chain OS=Mus musculus GN=Tubg1 PE=1 SV=1;sp|Q8VCK3|TBG2_MOUSE Tubulin gamma-2 chain OS=Mus musculus GN=Tubg2 PE=1 SV=1	2	14	14	14	12	11	13	13	12	12	8	8	10	9	10	11	12	11	13	13	12	12	8	8	10	9	10	11	12	11	13	13	12	12	8	8	10	9	10	11	53.4	53.4
P97355	P97355	14	14	14	Spermine synthase	Sms	sp|P97355|SPSY_MOUSE Spermine synthase OS=Mus musculus GN=Sms PE=1 SV=1	1	14	14	14	11	11	12	13	12	11	4	2	3	2	9	6	11	11	12	13	12	11	4	2	3	2	9	6	11	11	12	13	12	11	4	2	3	2	9	6	49.5	49.5
P97376	P97376	14	14	14	Protein FRG1	Frg1	sp|P97376|FRG1_MOUSE Protein FRG1 OS=Mus musculus GN=Frg1 PE=1 SV=2	1	14	14	14	13	13	12	10	13	13	8	8	2	6	7	9	13	13	12	10	13	13	8	8	2	6	7	9	13	13	12	10	13	13	8	8	2	6	7	9	48.8	48.8
P97384	P97384	14	14	14	Annexin A11	Anxa11	sp|P97384|ANX11_MOUSE Annexin A11 OS=Mus musculus GN=Anxa11 PE=1 SV=2	1	14	14	14	14	14	14	14	13	13	6	6	6	4	5	2	14	14	14	14	13	13	6	6	6	4	5	2	14	14	14	14	13	13	6	6	6	4	5	2	26.4	26.4
P97760	P97760	14	14	14	DNA-directed RNA polymerase II subunit RPB3	Polr2c	sp|P97760|RPB3_MOUSE DNA-directed RNA polymerase II subunit RPB3 OS=Mus musculus GN=Polr2c PE=1 SV=2	1	14	14	14	11	11	12	11	11	11	8	9	6	6	9	10	11	11	12	11	11	11	8	9	6	6	9	10	11	11	12	11	11	11	8	9	6	6	9	10	76.4	76.4
Q07139	Q07139	14	14	14	Protein ECT2	Ect2	sp|Q07139|ECT2_MOUSE Protein ECT2 OS=Mus musculus GN=Ect2 PE=1 SV=2	1	14	14	14	11	12	8	8	12	11	4	3	2	2	3	2	11	12	8	8	12	11	4	3	2	2	3	2	11	12	8	8	12	11	4	3	2	2	3	2	19.5	19.5
Q07802;O08791;O08792;Q8K4J2	Q07802;O08791	14;8;5;4	14;8;5;4	14;8;5;4	Transcription factor COE1;Transcription factor COE3	Ebf1;Ebf3	sp|Q07802|COE1_MOUSE Transcription factor COE1 OS=Mus musculus GN=Ebf1 PE=1 SV=1;sp|O08791|COE3_MOUSE Transcription factor COE3 OS=Mus musculus GN=Ebf3 PE=1 SV=1	4	14	14	14	13	12	12	12	11	12	8	7	5	8	8	7	13	12	12	12	11	12	8	7	5	8	8	7	13	12	12	12	11	12	8	7	5	8	8	7	28.6	28.6
Q14B71	Q14B71	14	14	14	Cell division cycle-associated protein 2	Cdca2	sp|Q14B71|CDCA2_MOUSE Cell division cycle-associated protein 2 OS=Mus musculus GN=Cdca2 PE=1 SV=2	1	14	14	14	8	10	10	8	6	8	7	6	2	1	7	3	8	10	10	8	6	8	7	6	2	1	7	3	8	10	10	8	6	8	7	6	2	1	7	3	19.6	19.6
Q3UFY7	Q3UFY7	14	14	14	7-methylguanosine phosphate-specific 5-nucleotidase	Nt5c3b	sp|Q3UFY7|5NT3B_MOUSE 7-methylguanosine phosphate-specific 5-nucleotidase OS=Mus musculus GN=Nt5c3b PE=1 SV=3	1	14	14	14	11	11	13	11	12	9	5	7	5	3	4	4	11	11	13	11	12	9	5	7	5	3	4	4	11	11	13	11	12	9	5	7	5	3	4	4	59.3	59.3
Q3UH60	Q3UH60	14	14	14	Disco-interacting protein 2 homolog B	Dip2b	sp|Q3UH60|DIP2B_MOUSE Disco-interacting protein 2 homolog B OS=Mus musculus GN=Dip2b PE=1 SV=1	1	14	14	14	7	10	9	6	9	5	4	3	3	4	3	2	7	10	9	6	9	5	4	3	3	4	3	2	7	10	9	6	9	5	4	3	3	4	3	2	12.8	12.8
Q3UM18	Q3UM18	14	14	14	Large subunit GTPase 1 homolog	Lsg1	sp|Q3UM18|LSG1_MOUSE Large subunit GTPase 1 homolog OS=Mus musculus GN=Lsg1 PE=1 SV=2	1	14	14	14	10	11	12	11	9	13	10	6	6	4	5	6	10	11	12	11	9	13	10	6	6	4	5	6	10	11	12	11	9	13	10	6	6	4	5	6	25.8	25.8
Q5DU05	Q5DU05	14	14	14	Centrosomal protein of 164 kDa	Cep164	sp|Q5DU05|CE164_MOUSE Centrosomal protein of 164 kDa OS=Mus musculus GN=Cep164 PE=1 SV=2	1	14	14	14	11	7	6	9	10	13	3	3	4	2	4	5	11	7	6	9	10	13	3	3	4	2	4	5	11	7	6	9	10	13	3	3	4	2	4	5	10.8	10.8
Q5SWD9	Q5SWD9	14	14	14	Pre-rRNA-processing protein TSR1 homolog	Tsr1	sp|Q5SWD9|TSR1_MOUSE Pre-rRNA-processing protein TSR1 homolog OS=Mus musculus GN=Tsr1 PE=1 SV=1	1	14	14	14	11	11	9	11	11	9	4	5	4	3	6	5	11	11	9	11	11	9	4	5	4	3	6	5	11	11	9	11	11	9	4	5	4	3	6	5	23.2	23.2
Q60676	Q60676	14	14	14	Serine/threonine-protein phosphatase 5	Ppp5c	sp|Q60676|PPP5_MOUSE Serine/threonine-protein phosphatase 5 OS=Mus musculus GN=Ppp5c PE=1 SV=3	1	14	14	14	13	13	12	13	13	11	3	2	3	2	4	5	13	13	12	13	13	11	3	2	3	2	4	5	13	13	12	13	13	11	3	2	3	2	4	5	36.5	36.5
Q61029	Q61029	26	14	14	Lamina-associated polypeptide 2, isoforms beta/delta/epsilon/gamma	Tmpo	sp|Q61029|LAP2B_MOUSE Lamina-associated polypeptide 2, isoforms beta/delta/epsilon/gamma OS=Mus musculus GN=Tmpo PE=1 SV=4	1	26	14	14	23	25	19	22	23	23	16	18	16	13	16	20	13	14	10	12	13	14	9	10	9	8	9	10	13	14	10	12	13	14	9	10	9	8	9	10	65.9	34.3
Q61171	Q61171	14	14	14	Peroxiredoxin-2	Prdx2	sp|Q61171|PRDX2_MOUSE Peroxiredoxin-2 OS=Mus musculus GN=Prdx2 PE=1 SV=3	1	14	14	14	12	12	11	11	13	12	6	7	4	5	4	4	12	12	11	11	13	12	6	7	4	5	4	4	12	12	11	11	13	12	6	7	4	5	4	4	65.7	65.7
Q61207	Q61207	14	14	14	Prosaposin	Psap	sp|Q61207|SAP_MOUSE Prosaposin OS=Mus musculus GN=Psap PE=1 SV=2	1	14	14	14	13	12	12	14	11	12	1	0	3	2	3	6	13	12	12	14	11	12	1	0	3	2	3	6	13	12	12	14	11	12	1	0	3	2	3	6	26.9	26.9
[truncated: 4,532 more rows]
[truncated: 82 more columns]
